# Supplementary material for: Synthesis, Crystal Structure and Spin-Orbit Coupling Analysis for Mono-Scorpionate Eu(III) Complexes
Source: Preprints.org preprint supplement (doi:10.20944/preprints202308.1806.v1), 2023-08-25

## checkCIF/PLATON report

Structure factors have been supplied for datablock(s) ppr2

THIS REPORT IS FOR GUIDANCE ONLY. IF USED AS PART OF A REVIEW PROCEDURE FOR PUBLICATION, IT SHOULD NOT REPLACE THE EXPERTISE OF AN EXPERIENCED CRYSTALLOGRAPHIC REFEREE.

No syntax errors found.      CIF dictionary      Interpreting this report

### Datablock: ppr2

---

Bond precision:      C-C = 0.0174 Å      Wavelength=0.71073

Cell:                      a=21.596(3)              b=17.912(2)              c=18.668(2)  
                                alpha=90              beta=115.419(4)              gamma=90

Temperature:              150 K

|                        | Calculated                                                                             | Reported                               |
|------------------------|----------------------------------------------------------------------------------------|----------------------------------------|
| Volume                 | 6522.2(14)                                                                             | 6522.3(14)                             |
| Space group            | P 21/c                                                                                 | P 1 21/c 1                             |
| Hall group             | -P 2ybc                                                                                | -P 2ybc                                |
| Moiety formula         | C26 H24 Eu2 F18 N12 O20 S6, 2(C13 H12 Eu F9 N6 O10 S3),<br>0.682(C4 H10 O), 2(C2 H3 N) | 0.682(C4 H10 O), 2(C2 H3 N)            |
| Sum formula            | C32.73 H36.82 Eu2 F18 N14<br>O20.68 S6                                                 | C32.90 H37.24 Eu2 F18 N14<br>O20.73 S6 |
| Mr                     | 1795.53                                                                                | 1798.66                                |
| Dx, g cm <sup>-3</sup> | 1.829                                                                                  | 1.832                                  |
| Z                      | 4                                                                                      | 4                                      |
| Mu (mm <sup>-1</sup> ) | 2.224                                                                                  | 2.224                                  |
| F000                   | 3522.6                                                                                 | 3530.0                                 |
| F000'                  | 3526.62                                                                                |                                        |
| h, k, lmax             | 26, 21, 22                                                                             | 26, 21, 22                             |
| Nref                   | 12484                                                                                  | 12125                                  |
| Tmin, Tmax             | 0.766, 0.935                                                                           | 0.602, 0.745                           |
| Tmin'                  | 0.766                                                                                  |                                        |

Correction method= # Reported T Limits: Tmin=0.602 Tmax=0.745

AbsCorr = MULTI-SCAN

Data completeness= 0.971

Theta(max)= 25.742

R(reflections)= 0.0612( 8725)

wR2(reflections)=  
0.1542( 12125)

S = 1.050

Npar= 841

The following ALERTS were generated. Each ALERT has the format

**test-name\_ALERT\_alert-type\_alert-level.**

Click on the hyperlinks for more details of the test.

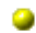

### Alert level C

|                   |                                                  |                             |              |
|-------------------|--------------------------------------------------|-----------------------------|--------------|
| PLAT041_ALERT_1_C | Calc. and Reported SumFormula                    | Strings Differ              | Please Check |
| PLAT042_ALERT_1_C | Calc. and Reported MoietyFormula                 | Strings Differ              | Please Check |
| PLAT043_ALERT_1_C | Calculated and Reported Mol. Weight              | Differ by ..                | 3.13 Check   |
| PLAT068_ALERT_1_C | Reported F000 Differs from Calcd (or Missing)... |                             | Please Check |
| PLAT202_ALERT_3_C | Isotropic non-H Atoms in Anion/Solvent .....     |                             | 5 Check      |
|                   | O1S C5S C6S C7S C8S                              |                             |              |
| PLAT213_ALERT_2_C | Atom F4                                          | has ADP max/min Ratio ..... | 3.9 prolat   |
| PLAT213_ALERT_2_C | Atom F6                                          | has ADP max/min Ratio ..... | 3.1 prolat   |
| PLAT213_ALERT_2_C | Atom C13                                         | has ADP max/min Ratio ..... | 3.1 prolat   |
| PLAT234_ALERT_4_C | Large Hirshfeld Difference F4                    | --C12                       | 0.17 Ang.    |
| PLAT242_ALERT_2_C | Low 'MainMol' Ueq as Compared to Neighbors of    |                             | S5 Check     |
| PLAT244_ALERT_4_C | Low 'Solvent' Ueq as Compared to Neighbors of    |                             | C1S Check    |
| PLAT342_ALERT_3_C | Low Bond Precision on C-C Bonds .....            |                             | 0.01743 Ang. |
| PLAT790_ALERT_4_C | Centre of Gravity not Within Unit Cell: Resd. #  |                             | 1 Note       |
|                   | C26 H24 Eu2 F18 N12 O20 S6                       |                             |              |
| PLAT911_ALERT_3_C | Missing FCF Refl Between Thmin & STh/L=          | 0.600                       | 222 Report   |

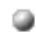

### Alert level G

FORMU01\_ALERT\_1\_G There is a discrepancy between the atom counts in the  
\_chemical\_formula\_sum and \_chemical\_formula\_moiety. This is  
usually due to the moiety formula being in the wrong format.  
Atom count from \_chemical\_formula\_sum: C32.9 H37.24 Eu2 F18 N14 O20.  
Atom count from \_chemical\_formula\_moiety: C32.72800 H36.82 Eu2 F18 N14

FORMU01\_ALERT\_2\_G There is a discrepancy between the atom counts in the  
\_chemical\_formula\_sum and the formula from the \_atom\_site\* data.  
Atom count from \_chemical\_formula\_sum: C32.9 H37.24 Eu2 F18 N14 O20.73  
Atom count from the \_atom\_site data: C32.72799 H36.81999 Eu2 F18 N14

CELLZ01\_ALERT\_1\_G Difference between formula and atom\_site contents detected.

CELLZ01\_ALERT\_1\_G ALERT: Large difference may be due to a  
symmetry error - see SYMMG tests  
From the CIF: \_cell\_formula\_units\_Z 4  
From the CIF: \_chemical\_formula\_sum C32.90 H37.24 Eu2 F18 N14 O20.73 S  
TEST: Compare cell contents of formula and atom\_site data

| atom | Z*formula | cif sites | diff |
|------|-----------|-----------|------|
| C    | 131.60    | 130.91    | 0.69 |
| H    | 148.96    | 147.28    | 1.68 |
| Eu   | 8.00      | 8.00      | 0.00 |
| F    | 72.00     | 72.00     | 0.00 |
| N    | 56.00     | 56.00     | 0.00 |
| O    | 82.92     | 82.73     | 0.19 |
| S    | 24.00     | 24.00     | 0.00 |

PLAT003\_ALERT\_2\_G Number of Uiso or Uij Restrained non-H Atoms ... 3 Report

PLAT007\_ALERT\_5\_G Number of Unrefined Donor-H Atoms ..... 4 Report

|                   |                                                  |                 |       |        |
|-------------------|--------------------------------------------------|-----------------|-------|--------|
| PLAT083_ALERT_2_G | SHELXL Second Parameter in WGHT                  | Unusually Large | 92.14 | Why ?  |
| PLAT186_ALERT_4_G | The CIF-Embedded .res File Contains ISOR Records |                 | 1     | Report |
| PLAT242_ALERT_2_G | Low 'MainMol' Ueq as Compared to Neighbors of    |                 | C2    | Check  |
| PLAT242_ALERT_2_G | Low 'MainMol' Ueq as Compared to Neighbors of    |                 | C12   | Check  |
| PLAT242_ALERT_2_G | Low 'MainMol' Ueq as Compared to Neighbors of    |                 | C18   | Check  |
| PLAT242_ALERT_2_G | Low 'MainMol' Ueq as Compared to Neighbors of    |                 | C3    | Check  |
| PLAT242_ALERT_2_G | Low 'MainMol' Ueq as Compared to Neighbors of    |                 | C10   | Check  |
| PLAT242_ALERT_2_G | Low 'MainMol' Ueq as Compared to Neighbors of    |                 | C24   | Check  |
| PLAT302_ALERT_4_G | Anion/Solvent/Minor-Residue Disorder (Resd 3 )   |                 | 100%  | Note   |
| PLAT304_ALERT_4_G | Non-Integer Number of Atoms in ..... (Resd 3 )   |                 | 10.23 | Check  |
| PLAT720_ALERT_4_G | Number of Unusual/Non-Standard Labels .....      |                 | 16    | Note   |
| PLAT722_ALERT_1_G | Angle Calc 108.00, Rep 109.50 Dev...             |                 | 1.50  | Degree |
|                   | C5S -C6S -H6SB 1_555 1_555 1_555 #               | 239             |       | Check  |
| PLAT722_ALERT_1_G | Angle Calc 108.00, Rep 109.50 Dev...             |                 | 1.50  | Degree |
|                   | C5S -C6S -H6SC 1_555 1_555 1_555 #               | 240             |       | Check  |
| PLAT722_ALERT_1_G | Angle Calc 111.00, Rep 109.50 Dev...             |                 | 1.50  | Degree |
|                   | H6SA -C6S -H6SC 1_555 1_555 1_555 #              | 242             |       | Check  |
| PLAT790_ALERT_4_G | Centre of Gravity not Within Unit Cell: Resd. #  |                 | 3     | Note   |
|                   | C4 H10 O                                         |                 |       |        |
| PLAT790_ALERT_4_G | Centre of Gravity not Within Unit Cell: Resd. #  |                 | 4     | Note   |
|                   | C2 H3 N                                          |                 |       |        |
| PLAT860_ALERT_3_G | Number of Least-Squares Restraints .....         |                 | 18    | Note   |
| PLAT870_ALERT_4_G | ALERTS Related to Twinning Effects Suppressed .. |                 | !     | Info   |
| PLAT910_ALERT_3_G | Missing # of FCF Reflection(s) Below Theta(Min). |                 | 1     | Note   |
| PLAT912_ALERT_4_G | Missing # of FCF Reflections Above STh/L= 0.600  |                 | 58    | Note   |
| PLAT913_ALERT_3_G | Missing # of Very Strong Reflections in FCF .... |                 | 1     | Note   |
| PLAT931_ALERT_5_G | CIFcalcFCF Twin Law [ 2 0 1] Est.d BASF          |                 | 0.11  | Check  |
| PLAT933_ALERT_2_G | Number of HKL-OMIT Records in Embedded .res File |                 | 10    | Note   |
| PLAT941_ALERT_3_G | Average HKL Measurement Multiplicity .....       |                 | 1.0   | Low    |

---

0 **ALERT level A** = Most likely a serious problem - resolve or explain  
 0 **ALERT level B** = A potentially serious problem, consider carefully  
 14 **ALERT level C** = Check. Ensure it is not caused by an omission or oversight  
 30 **ALERT level G** = General information/check it is not something unexpected

10 ALERT type 1 CIF construction/syntax error, inconsistent or missing data  
 14 ALERT type 2 Indicator that the structure model may be wrong or deficient  
 7 ALERT type 3 Indicator that the structure quality may be low  
 11 ALERT type 4 Improvement, methodology, query or suggestion  
 2 ALERT type 5 Informative message, check

---

It is advisable to attempt to resolve as many as possible of the alerts in all categories. Often the minor alerts point to easily fixed oversights, errors and omissions in your CIF or refinement strategy, so attention to these fine details can be worthwhile. In order to resolve some of the more serious problems it may be necessary to carry out additional measurements or structure refinements. However, the purpose of your study may justify the reported deviations and the more serious of these should normally be commented upon in the discussion or experimental section of a paper or in the "special\_details" fields of the CIF. checkCIF was carefully designed to identify outliers and unusual parameters, but every test has its limitations and alerts that are not important in a particular case may appear. Conversely, the absence of alerts does not guarantee there are no aspects of the results needing attention. It is up to the individual to critically assess their own results and, if necessary, seek expert advice.

### **Publication of your CIF in IUCr journals**

A basic structural check has been run on your CIF. These basic checks will be run on all CIFs submitted for publication in IUCr journals (*Acta Crystallographica*, *Journal of Applied Crystallography*, *Journal of Synchrotron Radiation*); however, if you intend to submit to *Acta Crystallographica Section C* or *E* or *IUCrData*, you should make sure that full publication checks are run on the final version of your CIF prior to submission.

### **Publication of your CIF in other journals**

Please refer to the *Notes for Authors* of the relevant journal for any special instructions relating to CIF submission.

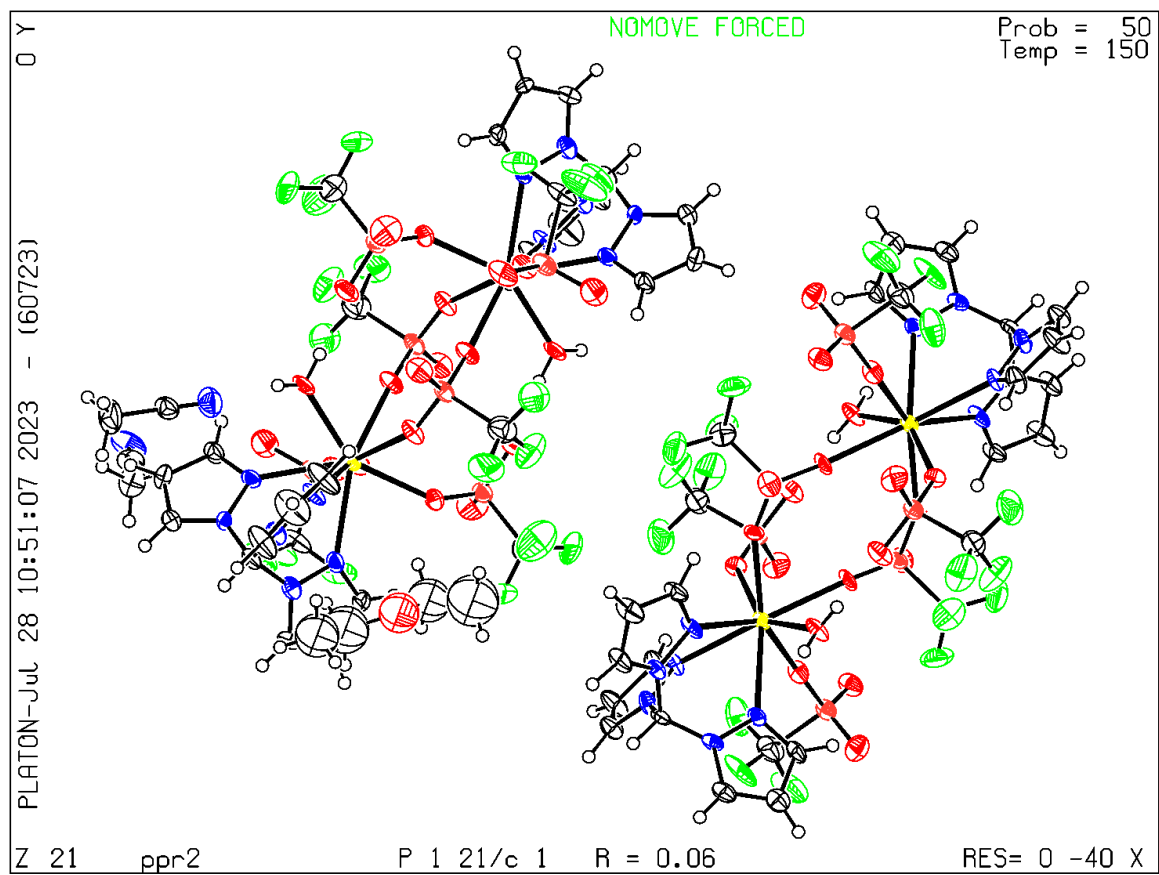

Supplement: Supplementary file 1 [file supplementary › PPR2_cifreport.pdf]
