# Supplementary material for: Synthesis, Crystal Structure and Spin-Orbit Coupling Analysis for Mono-Scorpionate Eu(III) Complexes
Source: Preprints.org preprint supplement (doi:10.20944/preprints202308.1806.v1), 2023-08-25
Supplement: Supplementary file 1 [file supplementary]

Archive with 9 entries (9 files):
- kds367_pl.cif
- Ppr1a.cif
- PPR2.cif
- PPR4.cif
- kds367_pl_cifreport.pdf
- Ppr1a_cifreport.pdf
- PPR2_cifreport.pdf
- PPR4_cifreport.pdf
- Supplementary information.pdf
