# Supplementary material for: Synthesis, Crystal Structure and Spin-Orbit Coupling Analysis for Mono-Scorpionate Eu(III) Complexes
Source: Preprints.org preprint supplement (doi:10.20944/preprints202308.1806.v1), 2023-08-25
Supplement: Supplementary file 1 [file supplementary › kds367_pl.cif]

data_kds367_pl
_audit_creation_date               2023-07-28
_audit_creation_method
;
Olex2 1.5
(compiled 2023.03.06 svn.rbb2c1857 for OlexSys, GUI svn.r6748)
;
_shelx_SHELXL_version_number       '2014/7'
_audit_contact_author_address      ?
_audit_contact_author_email        ?
_audit_contact_author_name         ''
_audit_contact_author_phone        ?
_publ_contact_author_id_orcid      ?
_publ_section_references
;
Dolomanov, O.V., Bourhis, L.J., Gildea, R.J, Howard, J.A.K. & Puschmann, H.
 (2009), J. Appl. Cryst. 42, 339-341.

Sheldrick, G.M. (2015). Acta Cryst. A71, 3-8.

Sheldrick, G.M. (2015). Acta Cryst. C71, 3-8.
;
_chemical_name_common              ?
_chemical_name_systematic          ?
_chemical_formula_moiety           'C10 H12 Eu N9 O10'
_chemical_formula_sum              'C10 H12 Eu N9 O10'
_chemical_formula_weight           570.25
_chemical_melting_point            ?
loop_
  _atom_type_symbol
  _atom_type_description
  _atom_type_scat_dispersion_real
  _atom_type_scat_dispersion_imag
  _atom_type_scat_source
 'C' 'C' 0.0033 0.0016 'International Tables Vol C Tables 4.2.6.8 and 6.1.1.4'
 'H' 'H' 0.0000 0.0000 'International Tables Vol C Tables 4.2.6.8 and 6.1.1.4'
 'Eu' 'Eu' -0.1578 3.6682
 'International Tables Vol C Tables 4.2.6.8 and 6.1.1.4'
 'N' 'N' 0.0061 0.0033 'International Tables Vol C Tables 4.2.6.8 and 6.1.1.4'
 'O' 'O' 0.0106 0.0060 'International Tables Vol C Tables 4.2.6.8 and 6.1.1.4'

_shelx_space_group_comment
;
The symmetry employed for this shelxl refinement is uniquely defined
by the following loop, which should always be used as a source of
symmetry information in preference to the above space-group names.
They are only intended as comments.
;
_space_group_crystal_system        'monoclinic'
_space_group_IT_number             15
_space_group_name_H-M_alt          'I 1 2/c 1'
_space_group_name_Hall             '-I 2yc'
loop_
  _space_group_symop_operation_xyz
 'x, y, z'
 '-x, y, -z+1/2'
 'x+1/2, y+1/2, z+1/2'
 '-x+1/2, y+1/2, -z+1'
 '-x, -y, -z'
 'x, -y, z-1/2'
 '-x+1/2, -y+1/2, -z+1/2'
 'x+1/2, -y+1/2, z'

_cell_length_a                     14.9027(3)
_cell_length_b                     15.6143(3)
_cell_length_c                     16.1279(4)
_cell_angle_alpha                  90
_cell_angle_beta                   108.4710(10)
_cell_angle_gamma                  90
_cell_volume                       3559.55(13)
_cell_formula_units_Z              8
_cell_measurement_reflns_used      9930
_cell_measurement_temperature      150(2)
_cell_measurement_theta_max        30.50
_cell_measurement_theta_min        2.88
_shelx_estimated_absorpt_T_max     0.762
_shelx_estimated_absorpt_T_min     0.533
_exptl_absorpt_coefficient_mu      3.601
_exptl_absorpt_correction_T_max    0.7461
_exptl_absorpt_correction_T_min    0.5830
_exptl_absorpt_correction_type     multi-scan
_exptl_absorpt_process_details
;
SADABS-2016/2 (Bruker,2016/2) was used for absorption correction.
wR2(int) was 0.0856 before and 0.0585 after correction.
The Ratio of minimum to maximum transmission is 0.7814.
The \l/2 correction factor is Not present.
;
_exptl_absorpt_special_details     ?
_exptl_crystal_colour              colourless
_exptl_crystal_colour_primary      colourless
_exptl_crystal_density_diffrn      2.128
_exptl_crystal_density_meas        ?
_exptl_crystal_density_method      ?
_exptl_crystal_description         prism
_exptl_crystal_F_000               2224
_exptl_crystal_size_max            0.2
_exptl_crystal_size_mid            0.16
_exptl_crystal_size_min            0.08
_exptl_transmission_factor_max     ?
_exptl_transmission_factor_min     ?
_diffrn_reflns_av_R_equivalents    0.0308
_diffrn_reflns_av_unetI/netI       0.0207
_diffrn_reflns_Laue_measured_fraction_full  0.998
_diffrn_reflns_Laue_measured_fraction_max  0.980
_diffrn_reflns_limit_h_max         21
_diffrn_reflns_limit_h_min         -21
_diffrn_reflns_limit_k_max         22
_diffrn_reflns_limit_k_min         -22
_diffrn_reflns_limit_l_max         22
_diffrn_reflns_limit_l_min         -22
_diffrn_reflns_number              44683
_diffrn_reflns_point_group_measured_fraction_full  0.998
_diffrn_reflns_point_group_measured_fraction_max  0.980
_diffrn_reflns_theta_full          25.242
_diffrn_reflns_theta_max           30.529
_diffrn_reflns_theta_min           1.943
_diffrn_ambient_temperature        150(2)
_diffrn_detector                   PIXEL
_diffrn_detector_area_resol_mean   7.41
_diffrn_detector_type              'Bruker PHOTON III area detector'
_diffrn_measured_fraction_theta_full  0.998
_diffrn_measured_fraction_theta_max  0.980
_diffrn_measurement_device         'three-circle diffractometer'
_diffrn_measurement_device_type    'Bruker D8 Venture diffractometer'
_diffrn_measurement_method         '\w and \f scans'
_diffrn_radiation_monochromator    'Incoatec HELIOS multilayer mirrors'
_diffrn_radiation_type             'MoK\a'
_diffrn_radiation_wavelength       0.71073
_diffrn_source                     'Incoatec IuS3.0 microfocus X-ray tube'
_diffrn_source_current             1.4
_diffrn_source_power               0.07
_diffrn_source_voltage             50.0
_diffrn_standards_interval_count   .
_diffrn_standards_interval_time    .
_diffrn_standards_number           .
_reflns_Friedel_coverage           0.000
_reflns_Friedel_fraction_full      .
_reflns_Friedel_fraction_max       .
_reflns_number_gt                  4589
_reflns_number_total               5332
_reflns_special_details
;
 Reflections were merged by SHELXL according to the crystal
 class for the calculation of statistics and refinement.
 
 _reflns_Friedel_fraction is defined as the number of unique
 Friedel pairs measured divided by the number that would be
 possible theoretically, ignoring centric projections and
 systematic absences.
;
_reflns_threshold_expression       'I > 2\s(I)'
_computing_cell_refinement         'Bruker SAINT'
_computing_data_collection         'Bruker APEX3'
_computing_data_reduction          'Bruker SAINT'
_computing_molecular_graphics      'Olex2 1.5 (Dolomanov et al., 2009)'
_computing_publication_material    'Olex2 1.5 (Dolomanov et al., 2009)'
_computing_structure_refinement    'SHELXL 2014/7 (Sheldrick, 2015)'
_computing_structure_solution      'SHELXT 2014/5 (Sheldrick, 2014)'
_refine_diff_density_max           0.554
_refine_diff_density_min           -0.843
_refine_diff_density_rms           0.110
_refine_ls_extinction_coef         .
_refine_ls_extinction_method       none
_refine_ls_goodness_of_fit_ref     1.091
_refine_ls_hydrogen_treatment      mixed
_refine_ls_matrix_type             full
_refine_ls_number_parameters       277
_refine_ls_number_reflns           5332
_refine_ls_number_restraints       2
_refine_ls_R_factor_all            0.0281
_refine_ls_R_factor_gt             0.0184
_refine_ls_restrained_S_all        1.091
_refine_ls_shift/su_max            0.001
_refine_ls_shift/su_mean           0.000
_refine_ls_structure_factor_coef   Fsqd
_refine_ls_weighting_details      
 'w=1/[\s^2^(Fo^2^)+(0.0132P)^2^+5.3602P] where P=(Fo^2^+2Fc^2^)/3'
_refine_ls_weighting_scheme        calc
_refine_ls_wR_factor_gt            0.0370
_refine_ls_wR_factor_ref           0.0414
_refine_special_details            ?
_olex2_refinement_description
;
1. Fixed Uiso
 At 1.2 times of:
  All C(H) groups
 At 1.5 times of:
  All O(H,H) groups
2. Restrained distances
 O10-H10A = O10-H10B
 0.88 with sigma of 0.01
3.a Ternary CH refined with riding coordinates:
 C1(H1)
3.b Aromatic/amide H refined with riding coordinates:
 C2(H2), C3(H3), C4(H4), C5(H5), C6(H6), C7(H7), C8(H8), C9(H9), C10(H10)
;
_atom_sites_solution_hydrogens     mixed
_atom_sites_solution_primary       dual
_atom_sites_solution_secondary     ?
loop_
  _atom_site_label
  _atom_site_type_symbol
  _atom_site_fract_x
  _atom_site_fract_y
  _atom_site_fract_z
  _atom_site_U_iso_or_equiv
  _atom_site_adp_type
  _atom_site_occupancy
  _atom_site_site_symmetry_order
  _atom_site_calc_flag
  _atom_site_refinement_flags_posn
  _atom_site_refinement_flags_adp
  _atom_site_refinement_flags_occupancy
  _atom_site_disorder_assembly
  _atom_site_disorder_group
 Eu1 Eu 0.44036(2) -0.21368(2) 0.03328(2) 0.02154(3) Uani 1 1 d . . . . .
 O1 O 0.33336(10) -0.10343(9) 0.06251(9) 0.0306(3) Uani 1 1 d . . . . .
 O2 O 0.40410(11) -0.16966(10) 0.18254(10) 0.0342(3) Uani 1 1 d . . . . .
 O3 O 0.33609(10) -0.04748(9) 0.18700(10) 0.0337(3) Uani 1 1 d . . . . .
 O4 O 0.54628(10) -0.29828(9) 0.15004(9) 0.0280(3) Uani 1 1 d . . . . .
 O5 O 0.60739(10) -0.25555(9) 0.05183(9) 0.0295(3) Uani 1 1 d . . . . .
 O6 O 0.69375(11) -0.32636(10) 0.16528(10) 0.0373(4) Uani 1 1 d . . . . .
 O7 O 0.43403(11) -0.07752(9) -0.05349(10) 0.0333(3) Uani 1 1 d . . . . .
 O8 O 0.49143(12) -0.18764(9) -0.09933(10) 0.0348(3) Uani 1 1 d . . . . .
 O9 O 0.49942(16) -0.06338(11) -0.15558(14) 0.0583(5) Uani 1 1 d . . . . .
 O10 O 0.54667(11) -0.10955(10) 0.12554(11) 0.0396(4) Uani 1 1 d D . . . .
 H10A H 0.5752(19) -0.1136(19) 0.1814(7) 0.059 Uiso 1 1 d D U . . .
 H10B H 0.544(2) -0.0555(7) 0.1142(19) 0.059 Uiso 1 1 d D U . . .
 N1 N 0.28573(12) -0.22827(10) -0.09435(11) 0.0268(4) Uani 1 1 d . . . . .
 N2 N 0.23868(12) -0.30301(10) -0.12107(11) 0.0255(3) Uani 1 1 d . . . . .
 N3 N 0.33824(12) -0.32634(10) 0.07023(10) 0.0248(3) Uani 1 1 d . . . . .
 N4 N 0.27843(12) -0.38111(10) 0.01280(10) 0.0253(3) Uani 1 1 d . . . . .
 N5 N 0.44142(12) -0.35484(10) -0.05275(10) 0.0253(3) Uani 1 1 d . . . . .
 N6 N 0.36435(12) -0.40594(10) -0.08652(10) 0.0256(3) Uani 1 1 d . . . . .
 N7 N 0.35707(11) -0.10602(10) 0.14551(11) 0.0254(3) Uani 1 1 d . . . . .
 N8 N 0.61886(12) -0.29409(10) 0.12319(11) 0.0263(3) Uani 1 1 d . . . . .
 N9 N 0.47593(13) -0.10851(11) -0.10410(12) 0.0320(4) Uani 1 1 d . . . . .
 C1 C 0.27363(15) -0.38327(12) -0.07774(12) 0.0255(4) Uani 1 1 d . . . . .
 H1 H 0.2275 -0.4290 -0.1070 0.031 Uiso 1 1 calc R U . . .
 C2 C 0.33033(14) -0.34727(13) 0.14743(12) 0.0270(4) Uani 1 1 d . . . . .
 H2 H 0.3640 -0.3200 0.2009 0.032 Uiso 1 1 calc R U . . .
 C3 C 0.26642(16) -0.41443(13) 0.14023(13) 0.0315(4) Uani 1 1 d . . . . .
 H3 H 0.2489 -0.4405 0.1860 0.038 Uiso 1 1 calc R U . . .
 C4 C 0.23447(16) -0.43465(13) 0.05326(13) 0.0306(4) Uani 1 1 d . . . . .
 H4 H 0.1900 -0.4780 0.0265 0.037 Uiso 1 1 calc R U . . .
 C5 C 0.51028(16) -0.39453(13) -0.07390(13) 0.0295(4) Uani 1 1 d . . . . .
 H5 H 0.5733 -0.3738 -0.0595 0.035 Uiso 1 1 calc R U . . .
 C6 C 0.47851(17) -0.47040(14) -0.11986(14) 0.0345(5) Uani 1 1 d . . . . .
 H6 H 0.5143 -0.5098 -0.1414 0.041 Uiso 1 1 calc R U . . .
 C7 C 0.38487(17) -0.47556(13) -0.12714(13) 0.0312(5) Uani 1 1 d . . . . .
 H7 H 0.3422 -0.5197 -0.1554 0.037 Uiso 1 1 calc R U . . .
 C8 C 0.23240(15) -0.16929(13) -0.14747(13) 0.0308(4) Uani 1 1 d . . . . .
 H8 H 0.2471 -0.1099 -0.1448 0.037 Uiso 1 1 calc R U . . .
 C9 C 0.15230(16) -0.20567(15) -0.20743(14) 0.0343(5) Uani 1 1 d . . . . .
 H9 H 0.1041 -0.1771 -0.2519 0.041 Uiso 1 1 calc R U . . .
 C10 C 0.15800(15) -0.29112(14) -0.18855(13) 0.0305(4) Uani 1 1 d . . . . .
 H10 H 0.1139 -0.3340 -0.2172 0.037 Uiso 1 1 calc R U . . .

loop_
  _atom_site_aniso_label
  _atom_site_aniso_U_11
  _atom_site_aniso_U_22
  _atom_site_aniso_U_33
  _atom_site_aniso_U_23
  _atom_site_aniso_U_13
  _atom_site_aniso_U_12
 Eu1 0.02402(5) 0.01627(5) 0.01999(5) -0.00071(3) 0.00082(4) 0.00214(3)
 O1 0.0298(8) 0.0328(8) 0.0248(7) 0.0040(6) 0.0024(6) 0.0070(6)
 O2 0.0317(8) 0.0321(8) 0.0309(8) 0.0044(6) -0.0015(6) 0.0114(6)
 O3 0.0303(8) 0.0288(8) 0.0461(9) -0.0124(7) 0.0178(7) -0.0026(6)
 O4 0.0257(7) 0.0274(7) 0.0276(7) 0.0026(6) 0.0036(6) 0.0042(5)
 O5 0.0330(8) 0.0262(7) 0.0274(7) 0.0021(6) 0.0070(6) 0.0021(6)
 O6 0.0278(8) 0.0406(9) 0.0380(9) 0.0034(7) 0.0027(7) 0.0133(7)
 O7 0.0421(9) 0.0210(7) 0.0353(8) -0.0038(6) 0.0101(7) 0.0021(6)
 O8 0.0511(10) 0.0204(7) 0.0368(8) 0.0063(6) 0.0196(7) 0.0061(6)
 O9 0.0865(15) 0.0308(9) 0.0727(14) 0.0194(9) 0.0467(12) 0.0005(9)
 O10 0.0317(8) 0.0301(8) 0.0452(10) -0.0158(7) -0.0044(7) 0.0022(7)
 N1 0.0302(9) 0.0221(8) 0.0229(8) -0.0012(6) 0.0010(7) -0.0020(6)
 N2 0.0298(9) 0.0231(8) 0.0201(8) -0.0008(6) 0.0028(7) -0.0027(6)
 N3 0.0263(8) 0.0245(8) 0.0210(8) -0.0043(6) 0.0037(7) -0.0020(6)
 N4 0.0332(9) 0.0219(8) 0.0189(8) -0.0027(6) 0.0057(7) -0.0033(6)
 N5 0.0316(9) 0.0191(7) 0.0244(8) -0.0009(6) 0.0078(7) -0.0012(6)
 N6 0.0340(9) 0.0197(8) 0.0224(8) -0.0026(6) 0.0079(7) -0.0021(6)
 N7 0.0193(8) 0.0233(8) 0.0302(9) -0.0033(7) 0.0030(7) 0.0003(6)
 N8 0.0252(8) 0.0204(8) 0.0289(9) -0.0041(6) 0.0026(7) 0.0028(6)
 N9 0.0347(10) 0.0226(8) 0.0352(10) 0.0028(7) 0.0060(8) -0.0031(7)
 C1 0.0342(11) 0.0220(9) 0.0187(9) -0.0025(7) 0.0060(8) -0.0051(8)
 C2 0.0320(11) 0.0271(10) 0.0185(9) -0.0003(7) 0.0032(8) 0.0038(8)
 C3 0.0425(12) 0.0277(10) 0.0232(10) 0.0036(8) 0.0090(9) -0.0004(9)
 C4 0.0409(12) 0.0227(9) 0.0269(10) -0.0001(8) 0.0090(9) -0.0052(8)
 C5 0.0360(11) 0.0270(10) 0.0274(10) 0.0017(8) 0.0126(9) 0.0041(8)
 C6 0.0499(14) 0.0250(10) 0.0306(11) -0.0038(8) 0.0155(10) 0.0050(9)
 C7 0.0491(13) 0.0197(9) 0.0244(10) -0.0046(7) 0.0110(9) -0.0007(9)
 C8 0.0334(11) 0.0261(10) 0.0278(10) 0.0033(8) 0.0024(9) 0.0044(8)
 C9 0.0283(11) 0.0427(13) 0.0265(10) 0.0059(9) 0.0010(8) 0.0042(9)
 C10 0.0281(10) 0.0392(11) 0.0205(9) -0.0021(8) 0.0023(8) -0.0050(9)

_geom_special_details
;
 All esds (except the esd in the dihedral angle between two l.s. planes)
 are estimated using the full covariance matrix.  The cell esds are taken
 into account individually in the estimation of esds in distances, angles
 and torsion angles; correlations between esds in cell parameters are only
 used when they are defined by crystal symmetry.  An approximate (isotropic)
 treatment of cell esds is used for estimating esds involving l.s. planes.
;
loop_
  _geom_bond_atom_site_label_1
  _geom_bond_atom_site_label_2
  _geom_bond_distance
  _geom_bond_site_symmetry_2
  _geom_bond_publ_flag
 Eu1 O1 2.4909(14) . ?
 Eu1 O2 2.7172(16) . ?
 Eu1 O4 2.4288(13) . ?
 Eu1 O5 2.4983(15) . ?
 Eu1 O7 2.5306(15) . ?
 Eu1 O8 2.5199(15) . ?
 Eu1 O10 2.4237(15) . ?
 Eu1 N1 2.5678(16) . ?
 Eu1 N3 2.5180(17) . ?
 Eu1 N5 2.6072(16) . ?
 O1 N7 1.272(2) . ?
 O2 N7 1.253(2) . ?
 O3 N7 1.230(2) . ?
 O4 N8 1.288(2) . ?
 O5 N8 1.261(2) . ?
 O6 N8 1.217(2) . ?
 O7 N9 1.270(2) . ?
 O8 N9 1.255(2) . ?
 O9 N9 1.222(2) . ?
 O10 H10A 0.868(10) . ?
 O10 H10B 0.861(10) . ?
 N1 N2 1.359(2) . ?
 N1 C8 1.335(3) . ?
 N2 C1 1.449(2) . ?
 N2 C10 1.355(3) . ?
 N3 N4 1.364(2) . ?
 N3 C2 1.328(3) . ?
 N4 C1 1.440(2) . ?
 N4 C4 1.351(3) . ?
 N5 N6 1.362(2) . ?
 N5 C5 1.332(3) . ?
 N6 C1 1.447(3) . ?
 N6 C7 1.353(2) . ?
 C1 H1 1.0000 . ?
 C2 H2 0.9500 . ?
 C2 C3 1.397(3) . ?
 C3 H3 0.9500 . ?
 C3 C4 1.368(3) . ?
 C4 H4 0.9500 . ?
 C5 H5 0.9500 . ?
 C5 C6 1.398(3) . ?
 C6 H6 0.9500 . ?
 C6 C7 1.365(3) . ?
 C7 H7 0.9500 . ?
 C8 H8 0.9500 . ?
 C8 C9 1.397(3) . ?
 C9 H9 0.9500 . ?
 C9 C10 1.365(3) . ?
 C10 H10 0.9500 . ?

loop_
  _geom_angle_atom_site_label_1
  _geom_angle_atom_site_label_2
  _geom_angle_atom_site_label_3
  _geom_angle
  _geom_angle_site_symmetry_1
  _geom_angle_site_symmetry_3
  _geom_angle_publ_flag
 O1 Eu1 O2 48.60(4) . . ?
 O1 Eu1 O5 146.25(5) . . ?
 O1 Eu1 O7 67.05(5) . . ?
 O1 Eu1 O8 115.64(5) . . ?
 O1 Eu1 N1 75.36(5) . . ?
 O1 Eu1 N3 88.10(5) . . ?
 O1 Eu1 N5 142.86(5) . . ?
 O4 Eu1 O1 121.80(5) . . ?
 O4 Eu1 O2 73.35(4) . . ?
 O4 Eu1 O5 52.17(5) . . ?
 O4 Eu1 O7 141.89(5) . . ?
 O4 Eu1 O8 116.67(5) . . ?
 O4 Eu1 N1 140.45(5) . . ?
 O4 Eu1 N3 74.31(5) . . ?
 O4 Eu1 N5 80.84(5) . . ?
 O5 Eu1 O2 115.49(4) . . ?
 O5 Eu1 O7 98.46(5) . . ?
 O5 Eu1 O8 65.57(5) . . ?
 O5 Eu1 N1 132.83(5) . . ?
 O5 Eu1 N3 116.28(5) . . ?
 O5 Eu1 N5 70.65(5) . . ?
 O7 Eu1 O2 107.12(5) . . ?
 O7 Eu1 N1 76.38(5) . . ?
 O7 Eu1 N5 114.92(5) . . ?
 O8 Eu1 O2 155.42(5) . . ?
 O8 Eu1 O7 50.46(5) . . ?
 O8 Eu1 N1 76.68(6) . . ?
 O8 Eu1 N5 68.31(5) . . ?
 O10 Eu1 O1 75.72(5) . . ?
 O10 Eu1 O2 63.97(6) . . ?
 O10 Eu1 O4 75.58(5) . . ?
 O10 Eu1 O5 70.69(5) . . ?
 O10 Eu1 O7 71.25(6) . . ?
 O10 Eu1 O8 95.64(6) . . ?
 O10 Eu1 N1 142.91(5) . . ?
 O10 Eu1 N3 130.53(6) . . ?
 O10 Eu1 N5 141.34(5) . . ?
 N1 Eu1 O2 110.66(5) . . ?
 N1 Eu1 N5 69.74(5) . . ?
 N3 Eu1 O2 70.26(5) . . ?
 N3 Eu1 O7 142.98(5) . . ?
 N3 Eu1 O8 132.95(5) . . ?
 N3 Eu1 N1 70.83(5) . . ?
 N3 Eu1 N5 68.98(5) . . ?
 N5 Eu1 O2 136.20(5) . . ?
 N7 O1 Eu1 101.31(10) . . ?
 N7 O2 Eu1 90.95(11) . . ?
 N8 O4 Eu1 96.92(10) . . ?
 N8 O5 Eu1 94.35(11) . . ?
 N9 O7 Eu1 95.48(11) . . ?
 N9 O8 Eu1 96.41(12) . . ?
 Eu1 O10 H10A 127(2) . . ?
 Eu1 O10 H10B 123(2) . . ?
 H10A O10 H10B 105(3) . . ?
 N2 N1 Eu1 124.89(12) . . ?
 C8 N1 Eu1 130.83(13) . . ?
 C8 N1 N2 104.27(16) . . ?
 N1 N2 C1 121.27(15) . . ?
 C10 N2 N1 111.98(16) . . ?
 C10 N2 C1 126.72(17) . . ?
 N4 N3 Eu1 126.24(12) . . ?
 C2 N3 Eu1 129.31(13) . . ?
 C2 N3 N4 104.44(16) . . ?
 N3 N4 C1 121.02(16) . . ?
 C4 N4 N3 111.87(16) . . ?
 C4 N4 C1 126.84(16) . . ?
 N6 N5 Eu1 124.15(12) . . ?
 C5 N5 Eu1 131.64(14) . . ?
 C5 N5 N6 104.21(16) . . ?
 N5 N6 C1 120.87(15) . . ?
 C7 N6 N5 111.89(17) . . ?
 C7 N6 C1 127.24(17) . . ?
 O1 N7 Eu1 54.21(9) . . ?
 O2 N7 Eu1 64.46(10) . . ?
 O2 N7 O1 116.97(16) . . ?
 O3 N7 Eu1 165.01(13) . . ?
 O3 N7 O1 120.99(16) . . ?
 O3 N7 O2 122.02(17) . . ?
 O4 N8 Eu1 56.76(9) . . ?
 O5 N8 Eu1 59.78(9) . . ?
 O5 N8 O4 116.46(15) . . ?
 O6 N8 Eu1 176.51(14) . . ?
 O6 N8 O4 120.73(17) . . ?
 O6 N8 O5 122.81(18) . . ?
 O7 N9 Eu1 59.03(10) . . ?
 O8 N9 Eu1 58.47(10) . . ?
 O8 N9 O7 117.01(17) . . ?
 O9 N9 Eu1 173.69(16) . . ?
 O9 N9 O7 121.47(18) . . ?
 O9 N9 O8 121.5(2) . . ?
 N2 C1 H1 107.6 . . ?
 N4 C1 N2 111.33(16) . . ?
 N4 C1 N6 110.93(16) . . ?
 N4 C1 H1 107.6 . . ?
 N6 C1 N2 111.62(16) . . ?
 N6 C1 H1 107.6 . . ?
 N3 C2 H2 124.2 . . ?
 N3 C2 C3 111.56(17) . . ?
 C3 C2 H2 124.2 . . ?
 C2 C3 H3 127.3 . . ?
 C4 C3 C2 105.38(18) . . ?
 C4 C3 H3 127.3 . . ?
 N4 C4 C3 106.74(18) . . ?
 N4 C4 H4 126.6 . . ?
 C3 C4 H4 126.6 . . ?
 N5 C5 H5 124.1 . . ?
 N5 C5 C6 111.8(2) . . ?
 C6 C5 H5 124.1 . . ?
 C5 C6 H6 127.4 . . ?
 C7 C6 C5 105.12(19) . . ?
 C7 C6 H6 127.4 . . ?
 N6 C7 C6 107.01(18) . . ?
 N6 C7 H7 126.5 . . ?
 C6 C7 H7 126.5 . . ?
 N1 C8 H8 124.2 . . ?
 N1 C8 C9 111.60(19) . . ?
 C9 C8 H8 124.2 . . ?
 C8 C9 H9 127.3 . . ?
 C10 C9 C8 105.31(18) . . ?
 C10 C9 H9 127.3 . . ?
 N2 C10 C9 106.84(18) . . ?
 N2 C10 H10 126.6 . . ?
 C9 C10 H10 126.6 . . ?

loop_
  _geom_torsion_atom_site_label_1
  _geom_torsion_atom_site_label_2
  _geom_torsion_atom_site_label_3
  _geom_torsion_atom_site_label_4
  _geom_torsion
  _geom_torsion_site_symmetry_1
  _geom_torsion_site_symmetry_2
  _geom_torsion_site_symmetry_3
  _geom_torsion_site_symmetry_4
  _geom_torsion_publ_flag
 Eu1 O1 N7 O2 -15.59(18) . . . . ?
 Eu1 O1 N7 O3 162.96(14) . . . . ?
 Eu1 O2 N7 O1 13.98(16) . . . . ?
 Eu1 O2 N7 O3 -164.55(16) . . . . ?
 Eu1 O4 N8 O5 -3.15(16) . . . . ?
 Eu1 O4 N8 O6 177.15(15) . . . . ?
 Eu1 O5 N8 O4 3.05(16) . . . . ?
 Eu1 O5 N8 O6 -177.26(16) . . . . ?
 Eu1 O7 N9 O8 7.91(19) . . . . ?
 Eu1 O7 N9 O9 -172.64(19) . . . . ?
 Eu1 O8 N9 O7 -7.96(19) . . . . ?
 Eu1 O8 N9 O9 172.59(19) . . . . ?
 Eu1 N1 N2 C1 0.1(3) . . . . ?
 Eu1 N1 N2 C10 178.47(14) . . . . ?
 Eu1 N1 C8 C9 -178.77(15) . . . . ?
 Eu1 N3 N4 C1 4.8(2) . . . . ?
 Eu1 N3 N4 C4 179.26(13) . . . . ?
 Eu1 N3 C2 C3 -179.25(13) . . . . ?
 Eu1 N5 N6 C1 1.2(2) . . . . ?
 Eu1 N5 N6 C7 -179.31(12) . . . . ?
 Eu1 N5 C5 C6 179.00(13) . . . . ?
 N1 N2 C1 N4 61.0(2) . . . . ?
 N1 N2 C1 N6 -63.5(2) . . . . ?
 N1 N2 C10 C9 0.6(2) . . . . ?
 N1 C8 C9 C10 0.4(3) . . . . ?
 N2 N1 C8 C9 0.0(2) . . . . ?
 N3 N4 C1 N2 -64.4(2) . . . . ?
 N3 N4 C1 N6 60.5(2) . . . . ?
 N3 N4 C4 C3 0.0(2) . . . . ?
 N3 C2 C3 C4 0.1(2) . . . . ?
 N4 N3 C2 C3 0.0(2) . . . . ?
 N5 N6 C1 N2 62.0(2) . . . . ?
 N5 N6 C1 N4 -62.7(2) . . . . ?
 N5 N6 C7 C6 0.1(2) . . . . ?
 N5 C5 C6 C7 0.6(2) . . . . ?
 N6 N5 C5 C6 -0.5(2) . . . . ?
 C1 N2 C10 C9 178.93(19) . . . . ?
 C1 N4 C4 C3 174.06(19) . . . . ?
 C1 N6 C7 C6 179.55(18) . . . . ?
 C2 N3 N4 C1 -174.43(17) . . . . ?
 C2 N3 N4 C4 0.0(2) . . . . ?
 C2 C3 C4 N4 0.0(2) . . . . ?
 C4 N4 C1 N2 122.0(2) . . . . ?
 C4 N4 C1 N6 -113.1(2) . . . . ?
 C5 N5 N6 C1 -179.22(17) . . . . ?
 C5 N5 N6 C7 0.3(2) . . . . ?
 C5 C6 C7 N6 -0.4(2) . . . . ?
 C7 N6 C1 N2 -117.4(2) . . . . ?
 C7 N6 C1 N4 117.9(2) . . . . ?
 C8 N1 N2 C1 -178.79(18) . . . . ?
 C8 N1 N2 C10 -0.4(2) . . . . ?
 C8 C9 C10 N2 -0.6(3) . . . . ?
 C10 N2 C1 N4 -117.1(2) . . . . ?
 C10 N2 C1 N6 118.3(2) . . . . ?

_shelx_res_file
;
    kds367_pl.res created by SHELXL-2014/7

TITL kds367 P 1 21/c 1 R = 0.02 New: I2/c
CELL 0.71073 14.9027 15.6143 16.1279 90 108.471 90
ZERR 8 0.0003 0.0003 0.0004 0 0.001 0
LATT 2
SYMM -X,+Y,0.5-Z
SFAC C H Eu N O
UNIT 80 96 8 72 80
DFIX 0.88 0.01 O10 H10a O10 H10b

L.S. 5
PLAN  5
SIZE 0.08 0.16 0.2
TEMP -123(2)
CONF
CONN 10 Eu1
BOND $H
MORE -1
fmap 2
acta
OMIT -20 1 3
OMIT 4 0 20
OMIT -20 0 6
OMIT -18 1 3
OMIT -20 1 1
OMIT -10 16 10
OMIT -20 1 5
OMIT -20 3 1
OMIT -2 2 22
REM <olex2.extras>
REM <HklSrc "%.\\kds367_sx.hkl">
REM </olex2.extras>

WGHT    0.013200    5.360200
FVAR       0.19182
EU1   3    0.440356   -0.213681    0.033280    11.00000    0.02402    0.01627 =
         0.01999   -0.00071    0.00082    0.00214
O1    5    0.333359   -0.103432    0.062507    11.00000    0.02979    0.03279 =
         0.02478    0.00397    0.00239    0.00701
O2    5    0.404100   -0.169661    0.182539    11.00000    0.03167    0.03208 =
         0.03094    0.00440   -0.00151    0.01145
O3    5    0.336086   -0.047476    0.186996    11.00000    0.03028    0.02877 =
         0.04608   -0.01244    0.01778   -0.00261
O4    5    0.546281   -0.298281    0.150036    11.00000    0.02571    0.02742 =
         0.02758    0.00263    0.00358    0.00419
O5    5    0.607388   -0.255550    0.051826    11.00000    0.03303    0.02622 =
         0.02742    0.00209    0.00698    0.00211
O6    5    0.693751   -0.326365    0.165285    11.00000    0.02777    0.04062 =
         0.03796    0.00341    0.00272    0.01335
O7    5    0.434031   -0.077522   -0.053494    11.00000    0.04205    0.02097 =
         0.03527   -0.00380    0.01009    0.00208
O8    5    0.491427   -0.187635   -0.099327    11.00000    0.05108    0.02038 =
         0.03685    0.00626    0.01959    0.00610
O9    5    0.499421   -0.063380   -0.155578    11.00000    0.08649    0.03078 =
         0.07267    0.01941    0.04666    0.00049
O10   5    0.546675   -0.109555    0.125543    11.00000    0.03166    0.03012 =
         0.04518   -0.01581   -0.00445    0.00219
H10A  2    0.575172   -0.113567    0.181408    11.00000   -1.50000
H10B  2    0.543971   -0.055521    0.114249    11.00000   -1.50000
N1    4    0.285726   -0.228266   -0.094354    11.00000    0.03021    0.02211 =
         0.02287   -0.00119    0.00099   -0.00198
N2    4    0.238677   -0.303012   -0.121075    11.00000    0.02978    0.02310 =
         0.02006   -0.00077    0.00280   -0.00265
N3    4    0.338242   -0.326344    0.070233    11.00000    0.02631    0.02447 =
         0.02098   -0.00431    0.00366   -0.00201
N4    4    0.278430   -0.381105    0.012801    11.00000    0.03322    0.02195 =
         0.01891   -0.00271    0.00565   -0.00329
N5    4    0.441422   -0.354844   -0.052751    11.00000    0.03158    0.01911 =
         0.02442   -0.00094    0.00777   -0.00122
N6    4    0.364349   -0.405939   -0.086520    11.00000    0.03398    0.01966 =
         0.02243   -0.00258    0.00792   -0.00208
N7    4    0.357072   -0.106017    0.145514    11.00000    0.01928    0.02331 =
         0.03021   -0.00334    0.00304    0.00033
N8    4    0.618858   -0.294091    0.123189    11.00000    0.02522    0.02044 =
         0.02892   -0.00408    0.00261    0.00283
N9    4    0.475927   -0.108509   -0.104095    11.00000    0.03465    0.02260 =
         0.03519    0.00284    0.00598   -0.00311
C1    1    0.273628   -0.383274   -0.077737    11.00000    0.03425    0.02197 =
         0.01872   -0.00254    0.00602   -0.00506
AFIX  13
H1    2    0.227542   -0.429042   -0.107033    11.00000   -1.20000
AFIX   0
C2    1    0.330334   -0.347272    0.147434    11.00000    0.03203    0.02714 =
         0.01848   -0.00030    0.00320    0.00384
AFIX  43
H2    2    0.363962   -0.319961    0.200890    11.00000   -1.20000
AFIX   0
C3    1    0.266420   -0.414433    0.140230    11.00000    0.04251    0.02772 =
         0.02321    0.00358    0.00898   -0.00036
AFIX  43
H3    2    0.248860   -0.440538    0.186022    11.00000   -1.20000
AFIX   0
C4    1    0.234471   -0.434648    0.053262    11.00000    0.04092    0.02267 =
         0.02689   -0.00007    0.00901   -0.00517
AFIX  43
H4    2    0.189966   -0.477971    0.026483    11.00000   -1.20000
AFIX   0
C5    1    0.510280   -0.394527   -0.073901    11.00000    0.03602    0.02698 =
         0.02737    0.00167    0.01257    0.00411
AFIX  43
H5    2    0.573296   -0.373793   -0.059505    11.00000   -1.20000
AFIX   0
C6    1    0.478506   -0.470398   -0.119862    11.00000    0.04989    0.02500 =
         0.03060   -0.00382    0.01545    0.00498
AFIX  43
H6    2    0.514340   -0.509845   -0.141384    11.00000   -1.20000
AFIX   0
C7    1    0.384866   -0.475560   -0.127137    11.00000    0.04911    0.01970 =
         0.02443   -0.00456    0.01102   -0.00066
AFIX  43
H7    2    0.342196   -0.519668   -0.155364    11.00000   -1.20000
AFIX   0
C8    1    0.232399   -0.169285   -0.147469    11.00000    0.03341    0.02610 =
         0.02778    0.00333    0.00244    0.00444
AFIX  43
H8    2    0.247099   -0.109941   -0.144820    11.00000   -1.20000
AFIX   0
C9    1    0.152300   -0.205669   -0.207429    11.00000    0.02831    0.04273 =
         0.02650    0.00593    0.00101    0.00416
AFIX  43
H9    2    0.104134   -0.177052   -0.251863    11.00000   -1.20000
AFIX   0
C10   1    0.157997   -0.291120   -0.188555    11.00000    0.02814    0.03917 =
         0.02050   -0.00213    0.00228   -0.00495
AFIX  43
H10   2    0.113855   -0.334015   -0.217237    11.00000   -1.20000
AFIX   0
HKLF 4 1 0 0 1 0 -1 0 1 0 0

REM  kds367 P 1 21/c 1 R = 0.02 New: I2/c
REM R1 =  0.0184 for    4589 Fo > 4sig(Fo)  and  0.0281 for all    5332 data
REM    277 parameters refined using      2 restraints

END

WGHT      0.0132      5.3608

REM Highest difference peak  0.554,  deepest hole -0.843,  1-sigma level  0.110
Q1    1   0.4189 -0.2074  0.0381  11.00000  0.05    0.55
Q2    1   0.4619 -0.1778  0.0276  11.00000  0.05    0.55
Q3    1   0.5354 -0.0698 -0.1153  11.00000  0.05    0.46
Q4    1   0.3631 -0.2233  0.0380  11.00000  0.05    0.45
Q5    1   0.3776 -0.1733  0.0609  11.00000  0.05    0.45
;
_shelx_res_checksum                36496
_shelx_hkl_file
;
   0   0  -1    0.10    0.40
   0   0   1    0.00    0.10
   0   0   1    0.10    0.40
   0   0   2 3515.25   69.99
   0   0  -2 3537.55   70.09
   0   0   2 3464.75   68.89
   0   0  -3    0.10    0.60
   0   0  -3   -1.10    1.20
   0   0   3   -0.20    1.10
   0   0   3   -0.10    0.30
   0   0  -3    0.30    1.70
   0   0  -3    0.20    0.40
   0   0   3    0.50    0.70
   0   0   3   -0.10    1.30
   0   0   4  445.26   10.90
   0   0  -4  453.85   16.90
   0   0   4  471.35   17.70
   0   0   4  458.05   16.60
   0   0  -4  459.55   11.10
   0   0  -4  467.45   13.30
   0   0  -4  478.85   18.10
   0   0   4  479.35   13.40
   0   0   5    0.50    2.20
   0   0   5    3.50    2.90
   0   0  -5    1.00    1.80
   0   0  -5    0.30    2.20
   0   0  -5    0.90    0.60
   0   0  -5    1.50    1.20
   0   0   5    0.70    0.50
   0   0   5    0.20    1.00
   0   0   6  752.42   26.60
   0   0  -6  795.02   18.40
   0   0   6  832.42   22.00
   0   0  -6  794.02   22.00
   0   0  -6  788.62   29.40
   0   0   6  799.02   28.50
   0   0  -6  780.42   27.80
   0   0   6  765.82   18.20
   0   0  -7    0.20    3.50
   0   0  -7    1.30    0.90
   0   0   7    3.30    1.70
   0   0  -7    1.60    1.40
   0   0  -7    7.90    4.30
   0   0   7    1.20    2.60
   0   0   7    1.40    0.90
   0   0   7   -0.40    3.40
   0   0  -8 2175.08   63.69
   0   0   8 2170.88   50.59
   0   0   8 2224.88   61.69
   0   0  -8 2218.18   61.49
   0   0   8 2196.88   59.49
   0   0   8 2232.18   45.30
   0   0  -8 2116.09   45.20
   0   0  -8 2202.28   51.19
   0   0  -9    0.10    0.80
   0   0  -9   -2.80    1.50
   0   0   9    1.70    1.90
   0   0   9    0.20    1.00
   0   0  -9   -0.20    5.40
   0   0  -9   -2.60    4.20
   0   0   9   -2.70    4.20
   0   0  10 3075.69   80.49
   0   0 -10 2932.51   61.69
   0   0 -10 3237.88   87.29
   0   0  10 3030.90   61.59
   0   0 -10 2999.90   69.19
   0   0  10 2969.80   81.99
   0   0  10 2932.21   68.59
   0   0 -11    0.40    1.30
   0   0  11   -0.40    2.50
   0   0  11   10.50    7.10
   0   0 -11    1.80    2.90
   0   0  11    0.60    1.30
   0   0 -11   -0.50    6.40
   0   0 -12   35.60   11.50
   0   0 -12   23.20    5.80
   0   0 -12   28.00    3.80
   0   0 -12   29.40   10.60
   0   0  12   20.40    5.20
   0   0  12   28.80    4.10
   0   0  12   18.80    9.50
   0   0 -13   -5.20    9.30
   0   0  13   -0.60    1.80
   0   0 -13    2.20    2.00
   0   0  13   -3.30   11.10
   0   0 -13   -2.00    3.30
   0   0 -13    5.50    9.60
   0   0 -14  282.67   27.00
   0   0  14  282.67   11.60
   0   0  14  286.57   11.70
   0   0 -14  306.57   18.00
   0   0 -14  317.47   29.70
   0   0  14  308.07   28.70
   0   0 -15   -5.60   11.90
   0   0  15    4.30    2.40
   0   0 -15   -5.60    3.90
   0   0  15    1.20    2.30
   0   0  15   11.30   15.40
   0   0 -15    0.90   13.20
   0   0 -16  510.55   39.10
   0   0 -16  497.45   40.00
   0   0  16  484.35   16.50
   0   0 -16  442.56   24.30
   0   0 -17   12.80   17.40
   0   0  17   -1.90    2.40
   0   0 -17    0.70    9.90
   0   0  17   -0.20    3.30
   0   0 -19    6.20   24.10
   0   0 -20   -8.40   29.70
   0   1  -1 1112.19   21.60
   0   1   1 1105.39   20.60
   0  -1  -1 1110.09   26.20
   0   1   2    6.50    0.50
   0   1  -2    9.80    2.10
   0   1  -2    3.20    1.10
   0   1   2    7.00    1.10
   0   1  -2    9.40    1.40
   0   1   2    6.40    0.50
   0   1  -2    6.40    1.00
   0   1  -2    3.50    1.10
   0   1   2    4.50    1.80
   0  -1   2    3.50    1.20
   0  -1  -2    5.80    2.00
   0  -1  -2    7.80    1.20
   0  -1   2    6.60    1.00
   0  -1   2    6.50    1.20
   0   1  -3  507.65   12.20
   0   1  -3  503.75   15.30
   0   1   3  493.45   10.60
   0   1  -3  521.15   13.30
   0   1   3  535.85   13.20
   0   1   3  507.75   10.70
   0   1   3  499.45   16.30
   0   1  -3  545.15   16.70
   0  -1   3  518.75   16.10
   0  -1   3  511.75   12.20
   0  -1   3  503.05   13.20
   0  -1  -3  514.75   18.90
   0  -1  -3  510.45   13.10
   0   1  -4    2.70    1.70
   0   1   4    5.10    2.80
   0   1   4    2.60    0.70
   0   1  -4    3.70    1.00
   0   1   4    2.00    1.10
   0   1   4    1.80    1.50
   0   1  -4    1.30    0.90
   0   1  -4    5.40    2.40
   0  -1  -4    1.60    0.90
   0  -1   4    3.60    1.00
   0  -1  -4    1.70    0.60
   0  -1   4    2.80    1.90
   0  -1  -4    1.00    2.20
   0  -1   4    1.60    0.80
   0   1  -5   18.60    3.10
   0   1   5   15.20    2.60
   0   1  -5   15.30    1.80
   0   1  -5   14.40    4.30
   0   1  -5   14.60    4.10
   0   1   5   14.80    4.60
   0   1   5   10.60    1.20
   0   1   5   15.30    3.60
   0  -1  -5    9.00    2.10
   0  -1   5    9.30    3.30
   0  -1  -5    9.40    3.90
   0  -1  -5   10.30    1.20
   0  -1   5   10.00    3.20
   0  -1   5   10.30    2.30
   0  -1   5   11.60    1.80
   0   1  -6   73.19    4.30
   0   1  -6   65.79    7.60
   0   1   6   62.49    8.70
   0   1   6   70.29    3.40
   0   1   6   68.29    5.20
   0   1  -6   66.19    5.20
   0  -1   6   52.89    6.90
   0  -1  -6   67.89    5.30
   0  -1  -6   64.09    8.90
   0  -1   6   71.69    4.20
   0  -1   6   67.99    5.20
   0  -1   6  107.99   11.60
   0  -1  -6   71.89    3.40
   0   1  -7   54.89    3.90
   0   1   7   50.99    3.10
   0   1   7   51.79    4.90
   0   1  -7   34.60    6.80
   0   1   7   51.09    9.40
   0   1   7   61.59    9.70
   0   1  -7   53.39    7.90
   0   1  -7   43.00    4.50
   0  -1   7   71.59   11.50
   0  -1   7   62.89    8.10
   0  -1  -7   52.69    5.00
   0  -1  -7   48.10    3.00
   0  -1   7   48.10    3.60
   0  -1  -7   50.69    9.90
   0  -1   7   52.09    5.00
   0   1   8  125.79   13.40
   0   1  -8  143.99    6.80
   0   1  -8  140.49    8.80
   0   1   8  133.79    5.60
   0   1  -8  121.29   12.40
   0   1   8  120.49   12.00
   0   1  -8  139.99   13.00
   0   1   8  126.09    8.10
   0  -1  -8  134.69    5.60
   0  -1   8  144.29   12.70
   0  -1  -8  125.79   13.90
   0  -1   8  145.59    8.80
   0  -1   8  135.49    6.60
   0  -1  -8  144.49    8.80
   0   1   9  634.74   22.00
   0   1  -9  669.13   18.70
   0   1  -9  697.93   31.50
   0   1   9  666.83   32.00
   0   1   9  653.93   16.80
   0   1  -9  686.03   28.80
   0   1   9  664.93   29.40
   0   1  -9  672.93   22.80
   0   1  -9  681.43   30.80
   0  -1  -9  683.23   33.70
   0  -1   9  668.53   18.50
   0  -1  -9  656.23   16.90
   0  -1   9  674.53   22.60
   0  -1  -9  704.43   23.00
   0  -1   9  685.33   29.40
   0   1  10  199.98   11.80
   0   1 -10  216.98   18.20
   0   1  10  224.68    8.30
   0   1 -10  222.38   12.60
   0   1 -10  219.88    9.40
   0   1  10  167.88   18.10
   0   1 -10  173.78   20.00
   0   1  10  223.88    8.30
   0  -1 -10  219.18   12.40
   0  -1  10  205.58    9.10
   0  -1 -10  218.78    8.20
   0  -1  10  214.68   17.70
   0  -1  10  211.38   12.00
   0  -1 -10  180.48   18.30
   0   1 -11    2.60    9.50
   0   1 -11    4.90    6.70
   0   1 -11    5.50    3.40
   0   1  11    2.80    1.40
   0   1  11    2.00    1.60
   0   1  11    2.50    7.40
   0   1  11    4.50    3.00
   0   1 -11    1.50    6.50
   0   1  11    1.30    6.80
   0  -1  11   -1.60    2.80
   0  -1 -11    4.00    2.90
   0  -1 -11   -3.10    6.00
   0  -1  11   -1.30    7.10
   0  -1  11    2.30    1.90
   0   1 -12   16.90    3.50
   0   1  12   12.00    4.30
   0   1 -12   15.10    9.10
   0   1 -12    4.40    7.50
   0   1  12   10.50    2.50
   0   1 -12    2.80    3.50
   0   1 -12   15.10    9.00
   0   1  12    7.90    9.50
   0   1  12   13.40    2.70
   0   1  12    8.00    9.20
   0  -1  12   10.90    9.00
   0  -1  12   18.30    3.60
   0  -1 -12    7.80    8.40
   0  -1 -12    9.90    3.90
   0  -1  12    3.10    3.70
   0   1  13   24.90    3.60
   0   1 -13   26.40    6.30
   0   1 -13   36.40   12.80
   0   1 -13   21.90    3.90
   0   1  13   21.60   11.00
   0   1  13   20.00    3.30
   0   1 -13   28.30   11.00
   0  -1 -13   19.30    5.20
   0  -1  13   27.50    4.40
   0  -1 -13   28.60   12.90
   0   1 -14   38.60    5.40
   0   1  14   41.90    4.30
   0   1  14   36.40    4.00
   0   1  14   23.10   16.30
   0   1 -14   28.60    6.90
   0   1 -14   16.20   11.70
   0   1 -14   40.80   14.30
   0  -1 -14   27.10    6.70
   0  -1  14   40.00    5.00
   0  -1  14   21.30   11.80
   0  -1 -14   44.50   24.10
   0  -1 -14   30.80   14.10
   0   1  15   12.70    3.20
   0   1 -15   -0.10   12.70
   0   1 -15   16.90   13.20
   0   1  15   13.50    3.00
   0   1 -15    8.50    5.50
   0   1 -15   16.80    3.80
   0   1  15    6.60   15.50
   0  -1 -15    2.30    4.60
   0  -1 -15   -0.10   15.60
   0  -1 -15   26.80   14.40
   0  -1  15   19.90    4.10
   0  -1  15   11.40    3.00
   0   1 -16  125.29   22.80
   0   1 -16  121.19   12.70
   0   1 -16   76.99   19.70
   0  -1 -16  113.59   12.70
   0  -1  16  125.49    9.00
   0  -1  16  129.79    8.60
   0   1 -17  -14.60   18.30
   0   1  17   -1.10    2.20
   0   1 -17   22.30   16.40
   0   1 -17   11.90    7.60
   0  -1  17    1.80    3.50
   0  -1  17   -1.10    2.90
   0  -1 -17    2.10   17.80
   0   1 -18  193.48   31.40
   0   1 -18  242.18   19.90
   0  -1 -18  234.98   18.40
   0  -1 -18  176.18   33.20
   0   1 -19  -15.40   23.50
   0  -1  19    2.30    4.10
   0  -1 -19    4.90   24.90
   0   1 -20   26.70   29.70
   0  -1 -20   11.70   33.20
   0   2   1    0.50    0.70
   0   2   1    0.40    0.20
   0   2   1    0.00    0.20
   0   2  -1    0.60    0.70
   0   2  -1    0.50    0.30
   0   2  -1    0.10    0.50
   0   2  -1    0.70    0.40
   0   2   1   -0.30    1.00
   0  -2  -1    2.20    1.20
   0  -2  -1    0.80    0.40
   0  -2  -1    0.20    0.50
   0  -2  -1    0.20    0.20
   0  -2   1    0.30    0.30
   0  -2   1    0.50    0.80
   0  -2   1    0.30    0.30
   0  -2   1    0.30    0.70
   0   2   2 1686.63   32.70
   0   2  -2 1661.23   36.60
   0   2   2 1645.24   41.50
   0   2  -2 1661.33   33.20
   0   2  -2 1675.73   33.80
   0   2  -2 1603.64   33.40
   0   2   2 1650.13   31.20
   0  -2   2 1658.23   36.30
   0  -2  -2 1658.03   41.60
   0  -2   2 1696.33   33.20
   0  -2   2 1632.34   33.40
   0  -2   2 1680.33   33.90
   0  -2  -2 1649.63   32.60
   0  -2  -2 1676.83   31.20
   0   2   3    5.90    1.30
   0   2   3    5.70    3.10
   0   2   3    5.60    0.60
   0   2  -3    6.90    1.50
   0   2  -3    6.40    1.30
   0   2  -3    3.50    1.20
   0   2  -3    6.90    2.30
   0  -2   3    5.90    1.30
   0  -2  -3    9.70    3.50
   0  -2  -3    6.80    0.60
   0  -2   3    5.10    2.20
   0  -2  -3    5.70    1.30
   0  -2   3    7.10    1.40
   0  -2   3    5.30    1.60
   0   2   4  106.49    5.20
   0   2  -4  102.49    5.40
   0   2  -4  114.99    6.80
   0   2  -4  108.59    6.30
   0   2   4  106.99    9.70
   0   2   4  107.79    3.20
   0   2  -4  140.99   11.30
   0   2   4  100.29    3.00
   0   2  -4   96.19    4.80
   0  -2   4  109.69    7.50
   0  -2   4   94.69    4.70
   0  -2  -4  104.79    5.20
   0  -2   4  115.79    5.70
   0  -2  -4   99.79    9.60
   0   2  -5   15.50    3.50
   0   2  -5   20.60    4.30
   0   2  -5   22.80    4.50
   0   2   5   27.00    5.60
   0   2   5   25.50    6.30
   0   2   5   23.40    3.30
   0   2  -5   23.20    3.40
   0   2   5   24.70    1.60
   0   2   5   20.80    1.40
   0   2  -5   23.50    2.50
   0  -2   5   20.70    3.40
   0  -2  -5   16.20    5.10
   0  -2  -5   17.20    2.80
   0  -2   5   22.90    2.40
   0  -2   5   23.50    6.10
   0   2  -6 2422.36   57.69
   0   2   6 2332.37   45.30
   0   2   6 2444.66   65.59
   0   2   6 2440.16   51.39
   0   2   6 2372.66   59.49
   0   2  -6 2473.75   60.69
   0   2  -6 2422.06   51.99
   0   2  -6 2434.66   55.69
   0   2  -6 2254.07   49.00
   0   2   6 2239.78   45.40
   0  -2   6 2319.77   51.39
   0  -2   6 2385.26   58.49
   0  -2  -6 2349.86   65.99
   0  -2   6 2371.96   49.20
   0  -2  -6 2438.16   51.59
   0   2   7   32.00    7.30
   0   2  -7   25.80    3.00
   0   2  -7   16.70    4.50
   0   2   7   24.70    8.00
   0   2   7   21.20    3.50
   0   2  -7   21.20    5.30
   0   2   7   26.30    2.00
   0   2  -7   16.40    4.40
   0   2  -7   29.90    4.60
   0   2   7   26.40    2.00
   0  -2   7   27.30    4.00
   0  -2  -7   33.20    8.90
   0  -2   7   23.80    6.00
   0  -2   7   25.50    2.90
   0  -2  -7   35.30    4.90
   0   2   8 2903.41   56.39
   0   2   8 2836.62   56.09
   0   2  -8 2912.31   64.79
   0   2   8 2992.10   80.69
   0   2  -8 2989.70   73.79
   0   2  -8 2949.60   70.19
   0   2   8 2889.01   73.89
   0   2  -8 2883.91   60.69
   0   2  -8 2854.11   75.19
   0   2   8 2970.90   64.09
   0  -2   8 2899.81   60.29
   0  -2  -8 2964.30   64.39
   0  -2   8 2923.41   64.39
   0  -2  -8 2968.50   82.29
   0  -2   8 2826.12   72.69
   0   2   9   74.39   12.60
   0   2   9   49.50   11.60
   0   2  -9   65.59   11.30
   0   2  -9   57.79    4.80
   0   2   9   55.59    3.20
   0   2   9   60.99    3.50
   0   2  -9   48.30    9.90
   0   2   9   64.19    6.30
   0   2  -9   59.89    6.20
   0  -2   9   43.50    6.10
   0  -2   9   62.09   11.20
   0  -2   9   56.19    4.80
   0  -2  -9   51.69   12.00
   0  -2  -9   60.49    6.20
   0   2  10 1116.19   24.40
   0   2 -10 1114.09   38.60
   0   2 -10 1065.39   32.60
   0   2  10 1075.49   45.70
   0   2  10 1068.69   31.90
   0   2 -10 1114.39   43.50
   0   2 -10 1088.69   28.30
   0   2 -10 1187.08   43.20
   0   2  10 1100.79   41.60
   0   2  10 1095.29   24.30
   0  -2  10 1090.99   28.00
   0  -2  10 1039.20   32.00
   0  -2 -10 1096.09   47.60
   0  -2  10 1131.19   41.50
   0  -2 -10 1067.69   32.20
   0   2 -11   -0.30    1.70
   0   2  11    3.40    8.30
   0   2 -11   -0.10    5.60
   0   2 -11   -3.50    5.40
   0   2 -11   -1.40    2.50
   0   2  11    3.10    1.40
   0   2  11    2.70    6.70
   0   2  11    1.20    2.80
   0   2 -11    5.20    6.60
   0   2  11    1.20    1.10
   0  -2 -11   -4.50    6.60
   0  -2  11   -0.60    1.70
   0  -2 -11    3.00    2.60
   0  -2  11   -2.00    6.70
   0   2  12  147.99   19.90
   0   2 -12  123.89   15.30
   0   2 -12  139.39   17.70
   0   2  12  130.49    6.00
   0   2 -12  163.38   18.10
   0   2  12   85.99   13.30
   0   2  12  124.29    5.70
   0   2 -12  126.09   10.90
   0   2  12  117.19   10.20
   0   2 -12  120.59    7.90
   0  -2 -12  118.29   10.40
   0  -2  12  128.59   10.70
   0  -2  12  136.59    8.30
   0  -2  12  155.38   23.80
   0  -2 -12  140.59   20.30
   0   2 -13   -2.40    7.70
   0   2 -13   -5.10    8.00
   0   2 -13   -2.00    1.70
   0   2  13  -10.70    9.60
   0   2  13    1.20    1.40
   0   2 -13   -2.70    2.80
   0   2  13   -2.50   10.80
   0   2 -13    2.70    7.30
   0   2  13    0.60    1.30
   0  -2  13    1.70    2.20
   0  -2 -13   -0.80   10.00
   0  -2 -13    1.60    3.10
   0  -2  13    8.10    8.40
   0   2  14  165.48   25.50
   0   2  14  162.38   22.50
   0   2 -14  156.08   21.70
   0   2  14  164.28    7.00
   0   2 -14  166.18    9.80
   0   2 -14  170.68   13.50
   0   2  14  165.08    6.90
   0   2 -14  171.88   20.30
   0  -2 -14  174.48   25.50
   0  -2 -14  160.48   13.00
   0  -2  14  176.38    9.90
   0   2  15   17.20   15.70
   0   2 -15   11.00    5.40
   0   2 -15   19.80   13.20
   0   2  15   20.50    3.10
   0   2 -15   17.50    4.30
   0   2 -15   23.20   12.60
   0  -2 -15   -2.70   15.70
   0  -2 -15    9.00   14.30
   0  -2  15   23.90    4.70
   0  -2 -15   19.20    6.00
   0   2  16  453.35   40.50
   0   2 -16  427.96   33.80
   0   2 -16  457.25   17.90
   0   2 -16  459.55   36.70
   0   2 -16  477.55   24.70
   0  -2 -16  469.75   41.60
   0  -2  16  443.36   17.60
   0  -2 -16  477.85   24.80
   0   2  17   -2.10    2.00
   0   2 -17   -2.70   16.10
   0   2 -17    6.70   17.90
   0   2  17   -0.20    1.60
   0   2 -17   25.80    8.20
   0  -2 -17   -5.00   17.60
   0  -2  17    3.30    3.30
   0  -2  17   16.70    4.90
   0   2 -19    7.40   22.60
   0  -2  19   -2.90    4.70
   0  -2 -19    3.30   26.00
   0   2 -20   23.20   32.30
   0  -2 -20   52.89   54.19
   0   3   0    0.30    0.40
   0   3   0    0.60    0.90
   0   3   0    1.00    1.60
   0  -3   0    0.40    1.30
   0  -3   0    0.90    0.50
   0   3   1 2121.69   41.70
   0   3   1 2190.88   51.19
   0   3   1 2177.88   44.60
   0   3  -1 2139.19   45.30
   0   3  -1 2164.58   40.80
   0   3  -1 2111.59   46.10
   0   3   1 2158.78   39.90
   0  -3   1 2158.58   40.80
   0  -3  -1 2186.28   41.80
   0  -3   1 2117.49   42.80
   0  -3  -1 2146.89   50.99
   0  -3   1 2182.28   46.40
   0  -3  -1 2218.68   45.00
   0  -3  -1 2189.18   39.90
   0  -3   1 2083.89   45.20
   0   3   2   13.00    1.30
   0   3  -2   12.60    1.90
   0   3  -2   15.20    3.10
   0   3  -2    8.50    1.90
   0   3  -2   10.50    1.40
   0   3   2    7.20    2.10
   0   3   2   14.00    1.20
   0   3   2   10.30    3.90
   0  -3  -2   13.20    1.30
   0  -3   2    9.00    1.80
   0  -3  -2    8.90    3.40
   0  -3   2   16.10    3.00
   0  -3   2    8.80    1.40
   0  -3  -2   13.10    1.20
   0  -3   2   15.90    2.30
   0   3  -3 3137.09   65.59
   0   3   3 3079.49   56.99
   0   3  -3 2968.30   60.39
   0   3   3 3106.69   73.39
   0   3   3 3003.30   58.99
   0   3  -3 3014.20   60.49
   0   3  -3 3098.19   59.99
   0  -3   3 3047.30   64.59
   0  -3   3 3050.69   60.89
   0  -3  -3 3052.49   73.19
   0  -3   3 3036.00   59.89
   0  -3   3 2976.50   60.29
   0  -3  -3 3067.59   56.89
   0  -3  -3 3135.59   59.29
   0   3  -4   -0.20    0.70
   0   3   4   -0.60    2.80
   0   3   4    0.70    0.40
   0   3   4   -0.10    0.60
   0   3  -4    0.30    1.00
   0   3  -4    0.60    1.20
   0  -3   4    0.30    0.70
   0  -3  -4    1.30    0.40
   0  -3   4    0.10    1.90
   0  -3  -4    0.10    0.70
   0  -3   4    0.10    0.60
   0  -3   4    0.30    1.30
   0  -3  -4    1.90    2.90
   0   3  -5  768.72   22.40
   0   3  -5  732.93   25.60
   0   3  -5  748.03   20.40
   0   3  -5  778.82   21.40
   0   3   5  742.13   19.60
   0   3   5  753.82   15.40
   0   3  -5  760.32   19.80
   0   3   5  740.23   15.20
   0  -3   5  769.52   25.20
   0  -3  -5  749.82   31.30
   0  -3  -5  757.22   19.80
   0  -3   5  759.02   20.40
   0  -3   5  749.23   19.50
   0   3   6   15.20    1.20
   0   3   6   12.30    5.30
   0   3  -6   22.70    6.00
   0   3   6   16.80    4.90
   0   3  -6   13.70    3.80
   0   3  -6   14.00    2.60
   0   3   6   16.30    1.30
   0   3   6   14.90    2.80
   0   3  -6   15.80    3.10
   0   3  -6   10.10    3.10
   0  -3   6   11.70    2.90
   0  -3   6   19.50    6.30
   0  -3  -6   14.20    6.20
   0  -3  -6   19.90    3.50
   0  -3   6   13.80    2.60
   0   3  -7  624.64   23.40
   0   3   7  593.54   13.20
   0   3   7  625.54   30.70
   0   3  -7  637.64   20.00
   0   3   7  622.04   26.00
   0   3  -7  636.54   21.80
   0   3   7  614.34   19.10
   0   3  -7  561.44   25.40
   0   3   7  585.04   13.40
   0   3  -7  588.44   17.80
   0  -3   7  630.34   18.10
   0  -3   7  658.43   25.60
   0  -3  -7  672.13   32.30
   0  -3   7  638.84   19.80
   0  -3  -7  606.14   19.40
   0   3  -8  146.59    9.00
   0   3   8  102.29   14.40
   0   3   8  131.69    8.10
   0   3   8  132.69    4.40
   0   3   8  127.99   12.50
   0   3  -8  122.59   11.10
   0   3  -8  134.69    8.70
   0   3  -8   97.59    9.20
   0   3   8  140.79    4.60
   0   3  -8  130.09   12.70
   0  -3   8  135.39    8.50
   0  -3  -8  133.69   15.40
   0  -3   8  125.69   12.00
   0  -3  -8  153.08    8.80
   0   3  -9  457.05   15.90
   0   3   9  478.95   24.90
   0   3  -9  465.85   18.20
   0   3   9  468.95   17.70
   0   3  -9  453.15   22.70
   0   3  -9  454.25   25.00
   0   3   9  447.46   10.90
   0   3  -9  449.46   20.60
   0   3   9  456.05   28.60
   0   3   9  430.46   11.00
   0  -3   9  469.25   18.10
   0  -3  -9  440.46   17.30
   0  -3   9  463.85   15.60
   0  -3  -9  471.45   29.90
   0   3  10   40.80    6.40
   0   3  10   45.60    2.80
   0   3 -10   26.70    7.20
   0   3 -10   35.20    8.80
   0   3 -10   39.20    4.70
   0   3 -10   38.50    9.60
   0   3 -10   38.40    6.30
   0   3  10   46.40    2.70
   0   3  10   29.00    8.40
   0   3  10   33.20   11.40
   0  -3 -10   33.30   10.40
   0  -3  10   40.40    6.80
   0  -3 -10   43.40    6.80
   0  -3  10   44.90    4.70
   0  -3  10   38.20    9.60
   0   3 -11   97.09   14.20
   0   3  11   98.69   18.30
   0   3 -11  109.39    7.60
   0   3  11  113.09    9.30
   0   3 -11  128.89   15.20
   0   3 -11  120.69    9.90
   0   3  11   81.59   13.10
   0   3  11  109.69    4.40
   0   3  11  110.19    4.70
   0   3 -11   89.59   14.30
   0  -3 -11  127.59   19.30
   0  -3  11   81.49   12.20
   0  -3 -11  100.79    9.00
   0  -3  11   96.49   10.80
   0  -3  11  104.69    7.40
   0   3 -12   10.10    4.10
   0   3  12   17.00    2.30
   0   3  12   16.50    5.00
   0   3 -12   11.30    3.10
   0   3  12   16.20   11.40
   0   3  12   15.70    1.90
   0   3  12    9.80    7.90
   0   3 -12   14.10    7.60
   0   3 -12   13.70    7.50
   0   3 -12   17.90    7.90
   0  -3 -12   15.70   11.20
   0  -3  12   20.70    4.00
   0  -3  12   10.30    4.80
   0  -3  12   25.80    9.70
   0  -3 -12   17.60    4.70
   0   3  13    6.60    1.50
   0   3 -13    7.20    8.40
   0   3 -13   -0.20    3.30
   0   3 -13    8.70    3.00
   0   3  13    2.50    9.90
   0   3 -13   14.20    8.20
   0   3  13    6.70    1.70
   0   3 -13    7.10    8.50
   0   3  13    7.90   12.80
   0  -3  13    0.00   14.30
   0  -3 -13    7.30    4.20
   0  -3  13    6.50    3.10
   0  -3 -13    5.00   11.10
   0   3  14   10.90    1.70
   0   3  14    8.80    1.90
   0   3 -14   16.80   11.20
   0   3  14   -3.40   13.80
   0   3 -14   10.50   10.20
   0   3 -14   10.10   10.30
   0   3 -14    8.40    3.90
   0   3  14   12.80   12.20
   0   3 -14    5.40    3.10
   0  -3  14    8.80    3.80
   0  -3 -14   25.30    7.10
   0  -3 -14   17.80   13.50
   0   3 -15  264.57   24.10
   0   3 -15  201.58   24.90
   0   3  15  204.58   30.80
   0   3 -15  193.08   11.70
   0   3 -15  238.78   17.20
   0  -3 -15  235.38   30.80
   0  -3  15  211.68   12.00
   0  -3 -15  193.18   15.20
   0   3 -16   66.49   17.70
   0   3 -16   66.49   10.60
   0   3  16   43.50   21.80
   0   3 -16   79.59    8.20
   0  -3 -16   83.29   12.30
   0  -3 -16   45.40   20.10
   0  -3  16   88.59   10.10
   0   3 -17   93.09   13.20
   0   3 -17  126.09   22.50
   0   3 -17  126.59   10.20
   0  -3  17  123.29   10.40
   0  -3 -17  126.29   28.50
   0   3 -18   67.39   13.30
   0   3 -18   -8.90   21.80
   0   3 -18    5.50   18.50
   0  -3  18   14.40    6.30
   0  -3  18   -0.80    4.30
   0  -3 -18   59.59   25.90
   0   3 -19    8.10   23.10
   0  -3  19   -2.50    5.30
   0  -3 -19   -4.20   28.30
   0  -3 -20   -8.40   32.80
   0   4   0   24.00    4.60
   0   4   0   28.40    2.40
   0   4   0   26.60    3.20
   0  -4   0   22.80    3.00
   0  -4   0   28.30    2.40
   0  -4   0   29.20    4.50
   0   4   1    4.50    1.70
   0   4  -1    3.90    0.80
   0   4  -1    7.90    1.60
   0   4  -1    3.60    1.70
   0   4  -1    5.20    2.20
   0   4   1    5.30    1.20
   0   4   1    3.20    2.60
   0   4   1    4.90    0.50
   0  -4  -1    8.90    3.30
   0  -4  -1    6.00    2.10
   0  -4  -1    5.10    0.50
   0  -4   1    5.00    0.90
   0  -4  -1    4.90    1.20
   0  -4   1    3.10    1.50
   0  -4   1    4.70    1.30
   0  -4   1    2.70    1.80
   0   4   2 1393.16   41.80
   0   4  -2 1472.25   31.70
   0   4   2 1431.16   29.20
   0   4  -2 1423.46   29.30
   0   4   2 1416.56   28.30
   0   4  -2 1469.15   34.10
   0   4   2 1441.46   33.80
   0  -4   2 1406.16   29.30
   0  -4  -2 1446.16   42.30
   0  -4   2 1443.66   31.50
   0  -4  -2 1444.16   28.30
   0  -4  -2 1441.96   29.30
   0  -4   2 1474.25   34.60
   0  -4   2 1424.56   33.80
   0   4  -3    3.80    1.70
   0   4   3    5.30    1.20
   0   4  -3    2.30    1.70
   0   4  -3    5.20    1.30
   0   4   3    6.30    1.10
   0   4   3    3.80    2.20
   0   4  -3    4.30    1.40
   0   4   3    3.00    3.40
   0  -4   3    5.70    1.60
   0  -4   3    4.60    1.30
   0  -4   3    5.50    1.90
   0  -4   3    4.80    2.60
   0  -4  -3    4.50    1.00
   0  -4  -3    9.10    4.40
   0  -4  -3    8.70    1.60
   0   4  -4  255.97    9.10
   0   4  -4  239.08    9.30
   0   4  -4  233.88    9.20
   0   4   4  222.38   16.20
   0   4   4  228.98    8.20
   0   4  -4  231.28   12.40
   0   4   4  241.28    6.40
   0  -4   4  233.68    9.10
   0  -4   4  236.68    9.50
   0  -4  -4  234.58    6.30
   0  -4  -4  206.48   15.50
   0  -4  -4  239.68    8.30
   0  -4   4  230.28    8.70
   0  -4   4  236.48   11.80
   0   4  -5   18.60    3.10
   0   4  -5   17.20    2.90
   0   4   5   16.20    2.60
   0   4  -5   22.40    5.30
   0   4   5   18.50    1.40
   0   4   5   15.30    6.70
   0   4  -5   11.20    2.60
   0  -4  -5    8.10    4.60
   0  -4   5   17.20    3.40
   0  -4  -5   21.20    3.10
   0  -4   5   20.10    3.10
   0  -4   5   20.30    3.10
   0  -4  -5   20.30    1.40
   0  -4   5   24.20    5.70
   0   4   6  830.72   17.20
   0   4  -6  856.81   25.30
   0   4  -6  839.92   22.90
   0   4  -6  850.91   30.30
   0   4   6  831.32   17.40
   0   4   6  839.02   22.60
   0   4  -6  867.51   23.70
   0   4  -6  875.41   24.10
   0   4   6  817.42   35.90
   0  -4  -6  874.51   38.10
   0  -4  -6  839.42   22.60
   0  -4   6  901.21   29.50
   0  -4   6  827.32   23.40
   0  -4   6  881.51   23.00
   0   4  -7   86.39   12.30
   0   4  -7   61.99    5.20
   0   4   7   79.59   11.70
   0   4  -7   52.69    6.70
   0   4   7   49.10   10.60
   0   4  -7   68.89    5.90
   0   4  -7   45.80    5.90
   0   4   7   68.89    5.50
   0   4   7   68.99    2.70
   0   4   7   65.49    2.50
   0  -4  -7   74.49   13.90
   0  -4  -7   70.59    6.70
   0  -4   7   70.89    5.30
   0  -4   7   48.20    7.40
   0  -4   7   71.49    5.90
   0   4  -8  799.12   27.60
   0   4  -8  795.02   24.20
   0   4   8  745.13   15.60
   0   4  -8  742.93   25.00
   0   4   8  802.32   38.20
   0   4   8  742.23   31.50
   0   4  -8  734.63   22.10
   0   4   8  769.92   23.10
   0   4   8  748.93   15.80
   0  -4  -8  790.52   38.80
   0  -4   8  812.12   30.70
   0  -4   8  718.03   23.30
   0  -4   8  753.72   22.00
   0  -4  -8  752.52   23.10
   0   4   9   22.20    9.50
   0   4  -9   28.40    6.70
   0   4   9   25.10    4.50
   0   4  -9   31.80    8.80
   0   4  -9   23.50    4.70
   0   4   9   26.10    1.70
   0   4   9   23.30    7.90
   0   4   9   25.40    1.60
   0   4  -9   30.10    4.70
   0   4  -9   17.50    5.30
   0  -4  -9   17.40    8.60
   0  -4   9   22.50    4.60
   0  -4   9   18.40    6.70
   0  -4   9   28.00    4.60
   0  -4  -9   31.80    5.20
   0   4 -10  184.88   13.50
   0   4 -10  173.88   14.70
   0   4  10  201.28   17.80
   0   4  10  171.28    4.90
   0   4  10  179.48   21.00
   0   4 -10  176.78   11.30
   0   4  10  178.48    5.10
   0   4  10  186.18   11.10
   0   4 -10  180.68   10.00
   0   4 -10  182.48   17.20
   0  -4 -10  174.38   10.70
   0  -4 -10  153.98   20.10
   0  -4  10  159.48   16.10
   0  -4  10  170.98   11.20
   0  -4  10  173.68    9.70
   0   4  11   21.50    1.50
   0   4 -11   18.60    3.70
   0   4 -11   20.00    8.00
   0   4 -11   12.00    3.70
   0   4  11   13.80    4.20
   0   4  11   19.40    1.60
   0   4 -11   15.90    7.60
   0   4  11    6.80   10.10
   0   4  11   17.60    8.60
   0   4 -11   15.30    6.40
   0  -4 -11   13.80    9.70
   0  -4  11   15.50    3.80
   0  -4  11   18.40    8.00
   0  -4  11   22.30    5.30
   0  -4 -11   16.60    4.60
   0   4  12   60.89    8.30
   0   4 -12   60.09    8.90
   0   4 -12   59.39    6.40
   0   4  12   83.99   14.40
   0   4 -12   81.09   13.30
   0   4 -12   62.39   13.40
   0   4  12   69.49    2.70
   0   4  12   67.39    2.60
   0  -4  12   66.29    6.60
   0  -4 -12   67.39   18.00
   0  -4  12   73.89   15.70
   0  -4 -12   78.39    8.50
   0  -4  12   68.99    8.80
   0   4 -13   17.00    5.50
   0   4 -13   15.00    4.10
   0   4  13    8.50   10.20
   0   4 -13    9.40    8.00
   0   4  13    3.40   12.80
   0   4 -13   16.50    9.20
   0   4 -13   14.50    9.00
   0  -4  13   14.40    4.30
   0  -4 -13    6.40    4.10
   0  -4 -13   17.80   12.70
   0   4 -14   54.19   12.20
   0   4 -14   44.70    8.50
   0   4  14   51.29   13.40
   0   4 -14   52.79   13.70
   0   4 -14   52.39    7.30
   0   4 -14   55.19   14.40
   0  -4  14   49.20    6.80
   0  -4 -14   41.10    7.70
   0  -4 -14   36.20   16.80
   0   4  15   86.09   21.40
   0   4 -15   71.09   10.80
   0   4 -15   75.79   15.00
   0   4 -15   78.79   18.50
   0   4 -15   80.99   17.20
   0   4 -15   93.69    8.80
   0  -4  15   93.99    8.90
   0  -4 -15   75.39   10.60
   0  -4 -15   99.49   22.90
   0   4 -16  246.78   25.10
   0   4 -16  247.08   18.30
   0   4 -16  243.38   14.10
   0  -4 -16  243.28   35.50
   0  -4 -16  255.07   18.10
   0  -4  16  243.38   14.00
   0   4 -17   63.79   10.80
   0  -4  17   89.29   10.40
   0  -4 -17   79.09   26.40
   0   4 -18  117.99   11.10
   0  -4 -18  139.09   34.00
   0  -4 -18  118.99   15.20
   0   4 -19   -2.30   21.80
   0  -4  19    5.50    6.10
   0  -4 -19   -1.20   33.60
   0   5   0    2.50    1.00
   0   5   0    2.20    1.40
   0   5   0    2.90    2.60
   0  -5   0    3.10    2.70
   0  -5   0    1.40    0.70
   0  -5   0    0.70    1.50
   0   5   1  988.50   33.30
   0   5   1 1070.79   23.40
   0   5   1 1007.60   26.40
   0   5  -1 1026.80   24.40
   0   5  -1  992.40   20.40
   0   5  -1 1008.20   27.40
   0   5  -1 1004.10   29.90
   0  -5   1 1067.59   30.40
   0  -5   1 1053.99   24.40
   0  -5   1 1019.20   20.50
   0  -5  -1 1008.20   33.40
   0  -5   1 1027.60   27.30
   0  -5  -1  993.50   23.10
   0  -5  -1 1068.69   27.40
   0   5   2   13.60    5.10
   0   5   2   17.40    1.30
   0   5  -2   17.80    1.70
   0   5  -2   14.60    3.40
   0   5  -2   19.40    2.50
   0   5  -2   12.40    3.10
   0   5   2   18.70    2.00
   0   5   2   14.40    2.90
   0  -5   2   13.60    3.40
   0  -5  -2   14.10    3.20
   0  -5   2   18.50    1.80
   0  -5  -2   18.80    1.40
   0  -5   2   24.30    2.80
   0  -5  -2   21.30    5.90
   0  -5   2   10.90    2.60
   0  -5  -2   18.30    1.90
   0   5  -3 1124.59   27.10
   0   5   3 1098.19   39.40
   0   5   3 1124.99   29.90
   0   5  -3 1093.49   28.70
   0   5  -3 1081.99   24.60
   0   5   3 1105.89   23.60
   0   5  -3 1090.49   31.10
   0   5   3 1089.49   23.40
   0  -5   3 1056.59   28.10
   0  -5   3 1091.19   26.70
   0  -5  -3 1106.19   23.70
   0  -5  -3 1112.09   23.40
   0  -5   3 1120.29   24.70
   0  -5  -3 1137.09   39.80
   0  -5   3 1055.29   29.90
   0   5  -4   15.70    3.20
   0   5   4   23.00    2.40
   0   5   4   23.30    1.90
   0   5   4   24.00    7.40
   0   5  -4   20.10    3.20
   0   5   4   13.00    3.20
   0   5  -4   28.90    5.90
   0   5  -4   23.90    3.20
   0  -5  -4   23.20    2.40
   0  -5   4   22.00    3.30
   0  -5  -4   21.70    7.00
   0  -5   4   23.00    4.60
   0  -5   4   14.70    3.10
   0  -5   4   22.10    2.90
   0  -5  -4   23.80    1.90
   0   5   5  103.19    4.00
   0   5  -5  106.49    9.50
   0   5  -5  106.19    6.30
   0   5   5   93.49    5.40
   0   5   5   87.49   12.70
   0   5  -5  119.29    7.00
   0   5  -5  102.69    6.50
   0  -5   5  112.09    9.30
   0  -5  -5  124.89   16.00
   0  -5   5  103.99    6.10
   0  -5   5  117.89    7.90
   0  -5  -5  101.89    5.70
   0  -5   5  117.29    7.10
   0  -5  -5  110.69    4.00
   0   5   6    1.70    5.20
   0   5  -6    1.50    1.40
   0   5  -6    0.50    1.20
   0   5  -6    1.00    2.10
   0   5   6    0.80    1.20
   0   5  -6    1.80    3.10
   0   5   6    2.00    0.70
   0  -5   6    1.10    3.60
   0  -5  -6    1.30    0.60
   0  -5  -6    1.60    5.40
   0  -5  -6    0.50    1.30
   0  -5   6    1.20    1.30
   0   5   7 2925.11   85.09
   0   5  -7 2890.71   63.09
   0   5  -7 2878.81   63.19
   0   5  -7 2942.71   65.59
   0   5  -7 2862.61   63.39
   0   5   7 2875.01   54.79
   0   5  -7 3172.38   87.69
   0   5   7 2986.90   65.79
   0   5   7 2940.61   54.79
   0  -5   7 2856.41   71.69
   0  -5  -7 2932.41   86.49
   0  -5   7 2868.91   63.19
   0  -5   7 2868.61   62.79
   0   5  -8    5.90    2.60
   0   5  -8    2.60    3.30
   0   5   8    7.30    6.60
   0   5   8    2.70    1.60
   0   5  -8    2.60    1.80
   0   5   8    5.00    0.80
   0   5   8    4.80    0.80
   0   5  -8    5.50    3.90
   0   5   8    6.90    4.30
   0   5  -8    6.00    3.70
   0  -5   8    2.10    4.80
   0  -5   8    6.70    2.30
   0  -5  -8    6.80    2.10
   0  -5   8    7.20    2.60
   0  -5  -8    2.10    5.60
   0   5  -9  577.64   21.50
   0   5   9  571.54   35.40
   0   5   9  562.74   11.20
   0   5  -9  562.84   28.80
   0   5   9  582.04   11.30
   0   5  -9  561.54   19.50
   0   5  -9  562.84   23.10
   0   5  -9  599.54   21.20
   0   5   9  540.25   19.40
   0  -5  -9  529.65   19.40
   0  -5   9  533.45   18.90
   0  -5   9  545.45   26.60
   0  -5   9  564.24   20.60
   0  -5  -9  520.15   34.00
   0   5 -10   21.00    4.10
   0   5 -10   17.70    5.30
   0   5 -10   23.70    8.80
   0   5  10   29.40   12.50
   0   5 -10   23.30    5.40
   0   5  10   21.60    4.70
   0   5  10   17.60    8.40
   0   5 -10   20.40    6.30
   0  -5  10   17.70    7.10
   0  -5 -10   22.20   10.80
   0  -5 -10   18.80    4.30
   0  -5  10   18.90    4.40
   0  -5  10   21.60    4.20
   0   5 -11  326.87   15.10
   0   5  11  344.07   33.50
   0   5 -11  316.27   24.50
   0   5  11  349.07   24.90
   0   5 -11  368.56   21.50
   0   5  11  357.76   16.60
   0   5 -11  324.57   16.80
   0   5 -11  356.86   18.50
   0  -5  11  356.16   15.20
   0  -5  11  336.27   16.80
   0  -5 -11  365.96   31.70
   0  -5  11  344.57   24.30
   0  -5 -11  341.17   16.30
   0   5 -12   15.20    7.80
   0   5  12   22.40    6.00
   0   5 -12   24.60    5.50
   0   5  12   35.20   12.20
   0   5 -12   12.50    6.80
   0   5  12   20.20   13.60
   0   5 -12   18.90    5.90
   0   5 -12   18.50    8.80
   0  -5  12   24.60    5.20
   0  -5 -12   19.10    4.70
   0  -5  12   27.30    6.20
   0  -5 -12   23.60   12.60
   0   5  13  214.98   28.60
   0   5 -13  196.58   14.00
   0   5  13  166.38   22.40
   0   5 -13  179.08   11.70
   0   5 -13  195.28   22.50
   0   5 -13  207.28   18.70
   0  -5 -13  213.48   14.40
   0  -5  13  194.48   12.00
   0   5 -14   -3.30    8.90
   0   5 -14    2.20    2.90
   0   5  14   -1.10   12.90
   0   5 -14    3.00    4.90
   0   5 -14    5.20    8.90
   0   5 -14    3.70    9.10
   0  -5 -14  -14.00   12.20
   0  -5  14   -4.30    3.30
   0  -5 -14    2.20    4.20
   0   5 -15  440.36   28.90
   0   5 -15  437.76   26.60
   0   5 -15  440.36   19.50
   0   5 -15  408.86   34.00
   0   5 -15  405.86   23.00
   0  -5 -15  399.26   21.60
   0  -5 -15  431.66   41.00
   0  -5  15  439.86   19.20
   0   5  16  -19.70   16.70
   0   5 -16   17.90    5.40
   0   5 -16   28.30    9.00
   0   5 -16   24.20   15.90
   0   5 -16   -8.00   11.50
   0   5 -16  -19.20   12.10
   0  -5 -16   11.00   18.90
   0  -5 -16   20.80    7.40
   0   5 -18    2.60   17.70
   0   5 -18    9.40    5.20
   0  -5 -18   12.50    8.10
   0  -5 -18   19.10   25.40
   0   5 -19   93.69   11.80
   0  -5 -19   92.49   36.20
   0   6   0  863.81   21.40
   0   6   0  879.41   30.80
   0   6   0  826.52   24.70
   0  -6   0  851.21   30.20
   0  -6   0  850.51   25.00
   0  -6   0  827.82   21.30
   0   6  -1    1.90    2.80
   0   6  -1    3.40    1.40
   0   6   1    5.40    2.30
   0   6  -1    2.30    1.80
   0   6   1    2.40    3.30
   0   6   1    6.60    1.70
   0   6  -1    4.00    0.80
   0  -6   1    6.10    3.30
   0  -6  -1    3.30    1.20
   0  -6  -1    3.70    2.30
   0  -6   1    6.20    2.90
   0  -6   1    4.20    1.50
   0  -6   1    5.00    0.80
   0  -6  -1    4.10    3.40
   0   6  -2  196.48   11.00
   0   6  -2  197.58   11.70
   0   6   2  178.38    4.90
   0   6  -2  179.58    6.10
   0   6   2  178.68   14.80
   0   6  -2  191.88    8.60
   0   6   2  187.08    7.30
   0   6   2  182.28    9.80
   0  -6   2  189.68   10.50
   0  -6  -2  190.28   10.60
   0  -6   2  206.98   11.70
   0  -6   2  185.18    8.40
   0  -6   2  184.08    6.20
   0  -6  -2  189.68    4.90
   0  -6  -2  188.38   14.70
   0  -6  -2  188.68    7.30
   0   6  -3    9.80    3.30
   0   6  -3   20.10    4.70
   0   6  -3   14.60    3.00
   0   6   3   12.60    2.20
   0   6   3   10.80    5.90
   0   6   3   12.30    1.60
   0   6  -3   14.10    2.30
   0   6   3    5.80    2.50
   0  -6   3   14.10    2.20
   0  -6   3    6.90    3.00
   0  -6  -3   12.20    5.30
   0  -6   3   11.60    3.20
   0  -6   3   16.20    3.20
   0  -6  -3   12.90    2.10
   0  -6  -3   12.80    1.70
   0   6  -4   25.50    4.60
   0   6   4   31.70    2.60
   0   6  -4   34.90    6.80
   0   6   4   29.20    2.70
   0   6   4   28.70    8.70
   0   6  -4   32.10    3.10
   0   6  -4   36.50    4.60
   0   6   4   39.70    6.10
   0  -6  -4   32.80    2.80
   0  -6   4   30.80    4.50
   0  -6   4   46.80    7.60
   0  -6  -4   30.40    2.50
   0  -6   4   28.70    3.60
   0  -6  -4   31.30    9.20
   0  -6   4   29.50    3.60
   0   6   5    1.10    0.80
   0   6  -5    3.90    3.10
   0   6  -5   -0.30    1.10
   0   6   5    0.30    1.10
   0   6  -5    0.70    1.50
   0   6  -5    0.70    2.20
   0   6   5   -3.30    5.00
   0   6   5   -0.80    2.00
   0  -6   5    1.20    2.20
   0  -6   5    1.60    1.60
   0  -6   5    0.80    3.00
   0  -6  -5    1.20    0.80
   0  -6   5    0.00    1.30
   0  -6  -5    1.80    1.10
   0  -6  -5    1.10    4.50
   0   6  -6  113.99    7.60
   0   6   6  121.19    4.60
   0   6  -6  115.99    7.70
   0   6  -6  108.49   10.70
   0   6   6  128.09    6.80
   0   6   6  123.49   15.80
   0  -6   6  112.79    7.40
   0  -6   6  121.09   10.90
   0  -6   6  119.59    8.50
   0  -6  -6  122.39    4.50
   0  -6  -6  114.69   15.20
   0  -6  -6  121.99    6.70
   0  -6   6  134.09    8.40
   0   6   7  168.88    5.20
   0   6  -7  133.09    9.40
   0   6  -7  176.08    9.50
   0   6   7  144.59   17.40
   0   6  -7  164.98   14.10
   0   6  -7  183.78    9.90
   0  -6  -7  161.78   18.60
   0  -6   7  176.58    9.50
   0  -6   7  150.98   15.10
   0  -6   7  174.08    9.60
   0  -6  -7  164.38    5.20
   0  -6  -7  162.58    9.90
   0   6   8   10.00    1.10
   0   6  -8    9.70    3.70
   0   6   8   19.80    9.30
   0   6  -8    5.80    3.60
   0   6  -8    9.30    3.00
   0   6   8    8.40    1.10
   0   6   8   10.20    2.90
   0   6  -8    5.50    2.40
   0   6  -8    3.90    3.80
   0  -6   8    7.60    2.70
   0  -6   8    3.20    4.50
   0  -6  -8    7.90    7.40
   0  -6  -8   15.80    3.50
   0  -6   8   12.50    3.50
   0   6  -9  117.39   14.00
   0   6  -9   96.39    7.70
   0   6  -9   97.09    8.10
   0   6  -9   92.39    9.30
   0   6  -9   71.99    7.70
   0   6   9   90.69    7.30
   0   6   9  112.49   16.10
   0   6   9  106.89   18.50
   0  -6   9   87.29    7.80
   0  -6   9  105.99    7.80
   0  -6   9   90.89   13.20
   0  -6  -9  102.49    7.70
   0  -6  -9   74.49   15.80
   0   6  10  170.08   22.30
   0   6  10  165.58   10.30
   0   6  10  162.78   17.70
   0   6 -10  143.19   10.70
   0   6 -10  137.89    9.60
   0   6 -10  157.28   12.60
   0   6 -10  152.58   10.70
   0   6 -10  149.29   16.60
   0  -6 -10  172.88   22.10
   0  -6  10  168.48   11.10
   0  -6  10  142.39    9.60
   0  -6 -10  172.18   10.60
   0  -6  10  153.68   18.80
   0   6 -11   65.79   10.00
   0   6  11   63.19   13.80
   0   6 -11   74.69    7.30
   0   6 -11   39.90    7.60
   0   6  11   66.19   17.70
   0   6  11   62.39    8.20
   0   6 -11   68.39   14.40
   0   6 -11   72.59    9.20
   0  -6  11   69.29    9.20
   0  -6 -11   52.39   15.50
   0  -6  11   74.49    7.40
   0  -6 -11   56.59    7.40
   0   6  12   29.70   12.10
   0   6 -12   17.60    4.90
   0   6  12   18.20    5.90
   0   6 -12   14.80    7.30
   0   6  12   19.00   14.90
   0   6 -12   37.70   12.40
   0   6 -12   25.80    7.30
   0  -6 -12   28.50   14.20
   0  -6  12   28.40    6.70
   0  -6 -12   20.40    5.70
   0   6 -13   51.39    8.20
   0   6 -13   41.00    9.20
   0   6 -13   69.19   16.00
   0   6 -13   29.70    6.80
   0   6 -13   59.89   11.60
   0   6  13   64.39   17.00
   0  -6 -13   41.70   16.20
   0  -6  13   39.30    6.40
   0  -6 -13   37.40    7.10
   0   6 -14   81.29    8.80
   0   6 -14   93.89   14.30
   0   6 -14   68.69   14.80
   0   6 -14   85.29   12.60
   0   6  14  110.29   20.10
   0   6 -14   92.59   12.20
   0  -6  14   95.39    9.80
   0  -6 -14   99.39   24.50
   0  -6 -14  103.69   10.60
   0   6 -15   99.79    9.90
   0   6 -15   79.89   11.60
   0   6 -15   74.09   17.40
   0  -6 -15   70.79   22.00
   0  -6 -15   90.69   11.90
   0   6 -16   17.20    5.40
   0   6 -16   14.90    7.10
   0   6 -16   21.90   15.90
   0   6 -16   -7.20   11.70
   0   6  16    3.30   21.60
   0   6 -16   -2.20   10.60
   0  -6 -16   28.80   19.90
   0  -6 -16   18.40    7.00
   0   6 -17  160.98   13.20
   0   6 -17  189.58   17.20
   0   6 -17  168.18   30.10
   0  -6 -17  166.48   33.80
   0   6 -18    3.90    6.10
   0   6 -18    5.50   16.40
   0  -6 -18    7.50    7.30
   0  -6 -18   20.50   28.10
   0   6 -19   40.80    8.80
   0  -6 -19   62.69   35.30
   0   7   0    1.20    2.20
   0   7   0    6.10    1.90
   0   7   0    2.10    3.50
   0  -7   0    2.10    2.40
   0  -7   0    3.40    1.30
   0  -7   0    1.80    3.30
   0   7   1 6982.60  150.68
   0   7  -1 6697.43  138.19
   0   7   1 6556.14  136.79
   0   7  -1 6882.21  145.39
   0   7  -1 6866.71  125.99
   0  -7   1 6919.21  126.19
   0  -7   1 7077.19  138.79
   0  -7  -1 6964.10  131.89
   0  -7  -1 6849.81  149.88
   0  -7   1 6897.81  144.69
   0  -7  -1 7093.19  138.79
   0   7  -2   11.10    4.40
   0   7  -2   13.80    3.30
   0   7   2    8.60    2.90
   0   7   2   13.30    0.90
   0   7   2    8.60    5.40
   0   7   2   16.80    2.80
   0   7  -2   12.20    1.80
   0   7  -2   10.60    3.80
   0  -7  -2   15.20    2.60
   0  -7   2   11.40    4.40
   0  -7   2   10.30    1.70
   0  -7  -2    6.20    3.20
   0  -7  -2   15.00    6.00
   0  -7  -2   13.20    0.90
   0  -7   2   13.00    3.70
   0   7   3  746.43   18.90
   0   7   3  730.23   24.20
   0   7  -3  748.53   18.30
   0   7  -3  758.32   22.00
   0   7  -3  733.93   25.50
   0   7  -3  767.12   26.50
   0   7   3  739.43   34.40
   0   7   3  763.92   16.50
   0  -7   3  722.03   21.40
   0  -7  -3  733.23   19.00
   0  -7  -3  755.92   16.40
   0  -7   3  779.82   18.40
   0  -7   3  735.33   24.90
   0  -7  -3  722.43   34.30
   0  -7   3  755.92   25.30
   0   7  -4   12.90    4.30
   0   7  -4   11.40    2.90
   0   7  -4    7.80    3.80
   0   7  -4   13.50    2.40
   0   7   4   12.70    2.10
   0   7   4    4.00    5.90
   0   7   4   15.60    4.60
   0   7   4   11.20    1.90
   0  -7   4    8.00    4.30
   0  -7  -4    8.10    5.80
   0  -7   4   16.10    2.70
   0  -7   4    8.20    3.40
   0  -7   4   15.50    3.30
   0  -7  -4    9.70    1.80
   0  -7  -4   14.90    2.30
   0   7   5   23.50    2.40
   0   7  -5   29.70    5.30
   0   7   5   27.70    6.10
   0   7  -5   27.50    5.90
   0   7   5   22.80    3.00
   0   7   5   23.50    9.70
   0   7  -5   15.30    3.50
   0   7  -5   17.50    2.90
   0  -7   5   23.50    3.60
   0  -7  -5   17.90    7.70
   0  -7   5   28.60    4.70
   0  -7  -5   20.50    2.20
   0  -7   5   17.60    4.30
   0  -7  -5   23.30    3.10
   0  -7   5   21.30    5.10
   0   7  -6    7.50    3.30
   0   7  -6   12.60    3.60
   0   7   6   -0.10    6.60
   0   7  -6    6.60    2.60
   0   7   6    9.70    2.50
   0   7   6    0.50    2.30
   0   7  -6   10.00    5.00
   0   7   6    9.70    1.70
   0  -7   6    6.90    3.30
   0  -7   6   11.40    2.80
   0  -7  -6   12.70    7.30
   0  -7  -6    6.90    1.50
   0  -7  -6   11.70    2.40
   0  -7   6    7.00    4.30
   0  -7   6    8.30    2.40
   0   7  -7 3022.80   66.09
   0   7   7 2889.01   66.99
   0   7  -7 2995.30   78.79
   0   7  -7 3005.50   67.59
   0   7   7 3140.59   75.19
   0   7   7 2943.71   58.39
   0   7  -7 3103.99   66.49
   0   7   7 3134.69   93.19
   0  -7   7 3039.50   76.09
   0  -7  -7 3112.89   94.29
   0  -7   7 3127.09   67.29
   0  -7   7 3050.69   66.09
   0  -7  -7 3002.20   58.39
   0  -7   7 3026.80   67.19
   0  -7  -7 3060.39   64.09
   0   7   8    6.90    1.20
   0   7  -8    8.50    4.10
   0   7   8    7.00    2.80
   0   7  -8   -0.60    1.90
   0   7  -8    8.40    2.90
   0   7  -8    3.30    3.40
   0   7  -8    5.20    4.50
   0   7   8   10.60    9.10
   0  -7  -8    6.50    8.30
   0  -7  -8    6.20    1.30
   0  -7   8    4.50    5.10
   0  -7  -8    2.90    2.00
   0  -7   8    5.10    2.70
   0  -7   8    5.90    2.80
   0   7  -9 2435.36   56.79
   0   7  -9 2348.86   56.39
   0   7   9 2347.07   82.79
   0   7  -9 2328.67   70.59
   0   7   9 2228.28   43.60
   0   7   9 2386.26   70.19
   0   7   9 2424.26   54.59
   0   7  -9 2373.36   54.09
   0   7  -9 2408.06   56.79
   0  -7   9 2308.27   55.89
   0  -7  -9 2342.77   54.49
   0  -7  -9 2472.75   85.49
   0  -7   9 2325.17   55.79
   0   7  10   -7.40   10.80
   0   7  10    0.30    2.70
   0   7 -10    2.20    4.20
   0   7 -10    2.70    4.30
   0   7 -10    4.70    7.30
   0   7 -10    1.80    2.70
   0   7  10   -3.60    7.30
   0   7 -10    0.40    2.40
   0  -7 -10   -0.90    8.10
   0  -7 -10    4.50    2.60
   0  -7  10    0.40    2.80
   0  -7  10    1.30    2.80
   0   7  11  455.25   38.10
   0   7 -11  493.65   21.70
   0   7  11  469.95   29.70
   0   7 -11  486.25   20.00
   0   7 -11  485.85   30.60
   0   7 -11  483.95   20.90
   0   7  11  455.25   19.00
   0   7 -11  473.95   19.10
   0  -7  11  421.56   20.70
   0  -7 -11  476.95   19.60
   0  -7 -11  471.45   37.50
   0  -7  11  473.65   20.50
   0   7 -12   28.90    9.50
   0   7  12   20.60   10.30
   0   7 -12   17.80    4.90
   0   7 -12   11.10    6.20
   0   7  12   15.90    5.50
   0   7 -12   19.90    4.80
   0   7 -12   15.40    6.70
   0  -7  12   19.50    5.10
   0  -7 -12   18.00   12.90
   0  -7 -12   18.90    5.20
   0   7 -13  206.48   14.80
   0   7 -13  153.08   22.70
   0   7 -13  188.88   15.20
   0   7  13  187.78   24.40
   0   7 -13  204.08   16.10
   0   7 -13  214.28   14.70
   0  -7 -13  213.28   14.40
   0  -7  13  187.48   12.70
   0  -7 -13  212.78   29.90
   0   7 -14   -1.00   10.40
   0   7 -14    1.80    7.60
   0   7 -14   -0.60    4.40
   0   7  14   -2.60   12.20
   0   7 -14   -1.80    3.20
   0   7 -14    4.10    7.70
   0  -7 -14   -6.00   13.50
   0  -7 -14    3.80    4.50
   0   7 -15  332.67   33.20
   0   7 -15  361.16   19.20
   0   7 -15  390.46   22.10
   0  -7 -15  420.96   43.60
   0  -7 -15  391.26   20.90
   0   7 -16    4.70    4.20
   0   7 -16    2.30    5.80
   0   7 -16   -8.30   14.40
   0   7 -16   -0.60   10.10
   0   7 -16   -2.10    9.90
   0  -7 -16    6.20    5.40
   0  -7 -16   -1.40   19.90
   0   7 -17  606.34   48.70
   0   7 -17  593.84   26.40
   0   7 -17  565.74   29.40
   0  -7 -17  633.54   90.29
   0  -7 -17  638.04   41.60
   0   7 -18   -3.10   20.20
   0   7 -18   -1.00    5.40
   0  -7 -18   -2.60    6.80
   0  -7 -18  -15.80   27.90
   0   7 -19  126.69   15.00
   0   8   0 1499.75   35.60
   0   8   0 1475.25   48.20
   0   8   0 1435.36   39.90
   0  -8   0 1518.55   40.70
   0  -8   0 1503.85   48.40
   0  -8   0 1516.95   38.10
   0   8   1   10.20    2.30
   0   8  -1    5.60    4.30
   0   8  -1   15.60    3.30
   0   8   1   12.00    5.90
   0   8  -1   10.30    1.00
   0   8   1   14.20    4.10
   0   8  -1    7.90    3.40
   0  -8  -1   13.00    5.60
   0  -8   1    7.20    3.70
   0  -8   1   11.30    1.10
   0  -8   1   13.80    2.90
   0  -8  -1   12.80    4.30
   0  -8   1   12.80    5.20
   0  -8  -1   12.30    2.70
   0   8  -2  124.09   11.70
   0   8   2  127.49    9.30
   0   8  -2  144.19   10.70
   0   8  -2  126.29    4.90
   0   8   2  128.59    6.80
   0   8  -2  137.79    8.20
   0   8   2  113.39   13.90
   0  -8   2  132.99    5.00
   0  -8   2  146.09   10.50
   0  -8  -2  132.89   14.50
   0  -8  -2  133.59    7.00
   0  -8   2  119.99   11.30
   0  -8   2  135.69    7.80
   0   8  -3   18.20    5.40
   0   8   3   19.10    4.30
   0   8  -3   21.50    4.20
   0   8  -3   21.50    5.40
   0   8   3   21.60    1.70
   0   8  -3   17.50    2.50
   0   8   3   16.50    7.90
   0   8   3   19.60    3.00
   0  -8  -3   19.10    1.60
   0  -8   3   14.90    4.90
   0  -8   3   17.40    3.50
   0  -8  -3   15.20    7.70
   0  -8  -3   16.80    5.60
   0  -8  -3   23.50    2.90
   0  -8   3   19.60    2.80
   0   8   4   72.39   13.90
   0   8   4   69.49    3.80
   0   8  -4   69.79    8.50
   0   8   4   71.19    7.60
   0   8  -4   66.69    5.90
   0   8  -4   70.89    8.20
   0   8  -4   64.69    4.60
   0   8   4   71.79    4.60
   0  -8   4   74.79    8.90
   0  -8   4   76.39    8.00
   0  -8  -4   74.59    3.80
   0  -8   4   76.29    6.30
   0  -8   4   65.89    4.70
   0  -8  -4   68.89    4.70
   0  -8  -4   76.29   14.10
   0   8   5    1.10    5.90
   0   8   5    1.20    2.60
   0   8  -5    1.30    1.80
   0   8  -5    2.30    2.90
   0   8   5    0.40    0.80
   0   8   5    0.60    1.00
   0   8  -5   -1.20    3.10
   0   8  -5    1.00    1.20
   0  -8   5   -3.00    3.90
   0  -8   5    0.40    2.80
   0  -8  -5    4.50    6.30
   0  -8   5    0.60    1.60
   0  -8  -5    1.50    1.00
   0  -8   5    0.80    1.40
   0  -8  -5    0.60    1.10
   0   8  -6    7.20    2.60
   0   8   6    8.30    2.10
   0   8  -6    4.10    3.90
   0   8   6    9.30    1.80
   0   8  -6    7.60    2.50
   0   8  -6    8.80    3.70
   0   8   6   -4.30    7.70
   0   8   6    3.30    2.90
   0  -8   6    8.30    2.70
   0  -8  -6   11.20    2.00
   0  -8   6    8.60    5.70
   0  -8  -6    7.90    7.60
   0  -8  -6    8.90    2.20
   0  -8   6    9.10    3.80
   0  -8   6   10.20    3.10
   0   8  -7   91.29   11.70
   0   8  -7   83.99    6.70
   0   8   7   69.09   15.80
   0   8  -7   64.59    7.20
   0   8   7   86.89    6.00
   0   8  -7   85.19    7.50
   0   8   7   90.39    4.40
   0   8   7   70.79    9.10
   0  -8   7   63.39    7.00
   0  -8  -7   84.39    4.20
   0  -8  -7   86.69    6.00
   0  -8   7   82.19    7.30
   0  -8  -7   76.29   16.90
   0  -8   7   77.59    6.40
   0   8  -8   97.89    8.40
   0   8   8   78.09   18.20
   0   8  -8   70.89    6.60
   0   8   8   85.59   10.60
   0   8   8   79.59    6.30
   0   8  -8   86.69    8.00
   0   8  -8   85.69    7.60
   0   8   8   79.49    3.80
   0   8  -8   98.69   14.90
   0  -8   8   72.79    7.00
   0  -8  -8   79.99    3.80
   0  -8   8  102.39    8.20
   0  -8  -8   65.19   15.90
   0  -8  -8   78.29    6.30
   0   8  -9  206.78   12.20
   0   8   9  210.08   24.70
   0   8  -9  237.58   20.00
   0   8  -9  235.48   13.20
   0   8   9  253.57    6.20
   0   8   9  246.88   11.90
   0   8   9  196.28   17.10
   0   8   9  240.48    6.20
   0   8  -9  253.97   13.30
   0  -8   9  236.78   12.70
   0  -8   9  248.88   13.20
   0  -8  -9  226.38   11.60
   0  -8  -9  225.78   25.00
   0   8 -10  127.99    9.60
   0   8  10  140.59    9.60
   0   8  10  152.68   25.20
   0   8  10  129.59   17.20
   0   8 -10  145.79   17.00
   0   8 -10  134.89   10.40
   0   8 -10  140.09   10.40
   0   8 -10  136.79   10.40
   0  -8 -10  161.08   23.50
   0  -8  10  141.79   10.40
   0  -8  10  150.08   10.60
   0  -8 -10  139.59    9.50
   0   8 -11   78.09    8.30
   0   8 -11   61.69    8.00
   0   8 -11   69.59   14.10
   0   8 -11   65.49    9.00
   0   8  11   60.89    7.70
   0   8 -11   60.29    8.70
   0  -8  11   75.79    9.40
   0  -8  11   66.59    8.10
   0  -8 -11   89.79   21.20
   0  -8 -11   65.09    8.20
   0   8 -12   20.30    5.40
   0   8 -12   23.90    6.40
   0   8 -12   34.90   12.00
   0   8 -12   18.90    6.10
   0   8  12   24.10    5.90
   0   8  12   24.50   11.90
   0  -8 -12   21.60    5.30
   0  -8 -12   21.30   14.80
   0  -8  12   23.00    6.00
   0   8 -13   -2.20    5.90
   0   8  13   -0.30   12.30
   0   8 -13   -0.30    9.00
   0   8 -13   -2.10    5.80
   0   8 -13    4.00    4.00
   0   8 -13    3.10    4.00
   0  -8 -13    1.30   13.70
   0  -8 -13    9.30    5.00
   0   8 -14    1.00    9.90
   0   8 -14   -0.20    3.50
   0   8  14    8.20   14.30
   0   8 -14    0.20    6.50
   0   8 -14    2.00    4.80
   0   8 -14    0.90    6.40
   0  -8 -14    0.60   16.80
   0  -8 -14    0.90    4.10
   0   8  15   23.00   17.70
   0   8 -15   53.79    9.20
   0   8 -15   45.10   15.90
   0   8 -15   48.20    8.50
   0  -8 -15   50.89    9.00
   0  -8 -15   53.29   21.80
   0   8 -16   45.70   16.60
   0   8 -16   45.80   16.00
   0   8 -16   43.40    8.50
   0  -8 -16   54.89    9.90
   0  -8 -16   63.59   25.40
   0   8 -17  150.08   14.50
   0   8 -17  121.29   15.30
   0   8 -17  117.99   25.20
   0  -8 -17  115.29   17.50
   0  -8 -17   86.89   32.60
   0   8 -18   22.00    8.10
   0   8 -18   94.59   41.70
   0  -8 -18   13.90    8.70
   0   9   0    0.80    1.10
   0   9   0    2.20    5.90
   0   9   0   -1.00    2.50
   0  -9   0   -0.50    1.10
   0  -9   0   -2.80    3.70
   0  -9   0    1.10    3.70
   0   9   1 2085.89   47.60
   0   9  -1 2069.49   39.30
   0   9  -1 2141.89   62.09
   0   9  -1 2129.59   54.79
   0   9   1 2129.69   53.79
   0   9  -1 2157.28   49.20
   0   9   1 2149.08   65.99
   0  -9   1 2042.40   39.60
   0  -9  -1 2199.48   55.29
   0  -9  -1 2253.37   66.79
   0  -9   1 2136.89   48.80
   0  -9   1 2207.38   54.99
   0  -9   1 2084.79   60.99
   0  -9  -1 2049.09   47.50
   0   9  -2    2.60    5.20
   0   9   2    0.90    1.00
   0   9  -2    2.20    3.10
   0   9  -2    0.80    0.80
   0   9   2   -0.90    2.10
   0   9   2    0.80    6.10
   0   9  -2   -1.00    1.20
   0  -9   2   -2.70    3.80
   0  -9   2   -0.80    1.40
   0  -9  -2    0.90    3.90
   0  -9  -2    2.30    1.70
   0  -9  -2   -0.20    5.00
   0  -9   2    1.90    3.90
   0  -9   2    0.90    0.70
   0   9   3  133.89   10.20
   0   9  -3  133.79   11.50
   0   9   3  144.29   17.70
   0   9   3  147.99    4.00
   0   9  -3  158.18    6.10
   0   9   3  140.59    7.40
   0   9  -3  146.09   12.80
   0   9  -3  139.29    9.00
   0  -9   3  142.49   11.70
   0  -9   3  134.89    8.70
   0  -9  -3  144.29    4.00
   0  -9  -3  144.59    7.60
   0  -9  -3  148.09   16.90
   0  -9   3  145.19    6.20
   0  -9  -3  152.78   12.50
   0  -9   3  151.98   12.60
   0   9  -4    0.40    1.30
   0   9   4    0.90    1.10
   0   9   4    5.40    7.90
   0   9  -4   -1.00    2.90
   0   9   4    1.70    1.00
   0   9   4    2.70    3.00
   0   9  -4   -0.80    3.80
   0   9  -4    1.20    1.20
   0  -9   4    1.00    1.90
   0  -9   4    0.70    3.40
   0  -9  -4    0.40    1.20
   0  -9   4    1.50    1.20
   0  -9  -4    0.30    0.80
   0  -9  -4   -2.60    5.00
   0  -9   4    2.80    4.60
   0   9   5   35.40    3.10
   0   9  -5   33.70    7.80
   0   9   5   35.00    3.40
   0   9  -5   42.40    6.20
   0   9  -5   35.80    4.50
   0   9  -5   34.20    7.00
   0   9   5   62.99   15.20
   0   9   5   52.49    8.30
   0  -9  -5   36.00    3.00
   0  -9   5   44.70    7.20
   0  -9   5   38.90    4.00
   0  -9  -5   32.60    3.30
   0  -9   5   42.60    8.60
   0  -9  -5   42.90   11.90
   0  -9   5   40.50    5.00
   0   9  -6    8.80    4.40
   0   9  -6   15.90    6.40
   0   9  -6   19.50    3.60
   0   9  -6   14.20    3.80
   0   9   6   15.40    5.10
   0   9   6   16.10    9.10
   0   9   6   14.90    2.70
   0   9   6   17.80    2.80
   0  -9   6   15.60    3.10
   0  -9  -6   13.30    2.40
   0  -9  -6    7.00    7.00
   0  -9  -6   17.50    2.70
   0  -9   6   17.00    4.20
   0  -9   6   10.70    4.40
   0   9  -7 1564.14   42.40
   0   9   7 1561.34   33.70
   0   9   7 1558.14   64.19
   0   9   7 1563.44   36.40
   0   9  -7 1554.24   41.00
   0   9   7 1610.54   47.60
   0   9  -7 1512.45   51.59
   0   9  -7 1577.94   39.00
   0  -9  -7 1564.94   36.50
   0  -9  -7 1625.54   65.79
   0  -9  -7 1482.25   33.30
   0  -9   7 1579.04   39.00
   0  -9   7 1545.85   41.50
   0  -9   7 1619.84   41.30
   0   9  -8   28.50    5.60
   0   9  -8   33.40    9.80
   0   9   8   25.10    6.50
   0   9  -8   29.30    5.60
   0   9   8   21.60    3.70
   0   9  -8   30.30    5.20
   0   9   8   26.90   13.60
   0   9   8   27.90    2.70
   0  -9  -8   31.00   12.30
   0  -9  -8   30.70    4.50
   0  -9  -8   28.60    2.70
   0  -9   8   29.50    5.00
   0   9   9 2775.82   51.79
   0   9  -9 2742.03   59.79
   0   9  -9 2534.35   87.19
   0   9  -9 2685.73   62.89
   0   9  -9 2695.53   65.19
   0   9   9 2681.93   72.59
   0   9  -9 2729.33   60.19
   0   9   9 2694.53   94.89
   0   9   9 2735.93   60.09
   0  -9  -9 2729.63   95.59
   0  -9  -9 2695.73   60.19
   0  -9   9 2620.04   62.39
   0  -9   9 2612.14   63.99
   0  -9  -9 2700.93   51.99
   0   9 -10   26.70    8.30
   0   9  10   25.10    7.80
   0   9 -10   35.40    6.30
   0   9 -10   37.30    6.20
   0   9 -10   48.80    7.50
   0   9 -10   30.90    5.50
   0   9  10   44.90    6.40
   0   9  10   25.10   10.10
   0  -9  10   39.50    6.90
   0  -9 -10   34.90    5.60
   0  -9  10   40.70    7.80
   0  -9 -10   28.70   14.10
   0   9  11  443.56   30.30
   0   9 -11  386.86   15.00
   0   9 -11  396.56   19.30
   0   9 -11  378.16   14.30
   0   9 -11  394.06   18.80
   0   9  11  401.86   17.30
   0   9 -11  393.86   29.00
   0   9  11  396.46   25.40
   0  -9 -11  396.96   17.30
   0  -9 -11  395.06   36.60
   0  -9  11  365.06   18.30
   0   9  12   -1.00    3.80
   0   9 -12    4.40    3.90
   0   9 -12   10.10    4.10
   0   9 -12    1.70    4.00
   0   9  12   16.90   12.60
   0   9 -12   -2.50    7.20
   0   9 -12   -0.60    3.40
   0   9  12    2.70    7.40
   0  -9 -12   -0.90    3.10
   0  -9 -12    4.30   14.30
   0   9 -13    7.90    4.10
   0   9  13    2.60    7.70
   0   9  13   11.70    7.40
   0   9 -13    1.60    4.30
   0   9  13    0.30   12.30
   0   9 -13    6.90    8.20
   0  -9 -13    9.70    5.20
   0  -9 -13    0.40   15.60
   0   9  14   18.30    8.80
   0   9 -14   24.20    6.10
   0   9  14   -2.40   14.90
   0   9 -14   29.30    7.60
   0   9 -14   39.40   14.90
   0  -9 -14   15.30   19.00
   0  -9 -14   30.40    7.20
   0   9 -15  293.77   18.50
   0   9 -15  320.87   20.30
   0   9 -15  313.27   34.10
   0   9  15  352.96   28.50
   0  -9 -15  299.17   18.00
   0  -9 -15  279.67   41.60
   0   9 -16   28.70    8.60
   0   9 -16   42.40    9.30
   0   9  16   20.90   12.10
   0   9 -16   65.29   22.20
   0  -9 -16   23.40    7.70
   0  -9 -16   -9.10   22.10
   0   9 -17  238.38   18.10
   0   9 -17  257.27   20.80
   0   9  17  295.77   30.10
   0   9 -17  216.08   36.50
   0  -9 -17  245.78   18.50
   0  -9 -17  236.48   46.20
   0   9 -18   11.20    8.50
   0   9 -18   30.20   24.70
   0   9  18   -2.10   14.30
   0  -9 -18    7.20    8.20
   0  10   0 3625.14   97.09
   0  10   0 3614.74   85.09
   0  10   0 3753.72   78.79
   0 -10   0 3734.33   96.99
   0 -10   0 3832.52   86.69
   0 -10   0 3734.33   78.59
   0  10  -1    1.80    1.90
   0  10   1    0.30    6.20
   0  10   1    2.50    2.90
   0  10  -1    3.10    3.50
   0  10  -1   -4.80    5.50
   0  10   1    0.60    1.50
   0 -10  -1    0.10    4.90
   0 -10  -1    5.20    5.50
   0 -10  -1    2.30    1.90
   0 -10   1    2.70    1.80
   0 -10   1   -0.20    4.50
   0  10  -2  944.01   19.90
   0  10   2  938.01   43.30
   0  10  -2  938.81   27.90
   0  10  -2  952.30   37.60
   0  10   2  934.81   31.50
   0  10  -2  948.11   33.20
   0  10   2  948.11   26.00
   0 -10  -2  962.60   42.80
   0 -10   2  933.71   27.60
   0 -10   2  970.50   37.30
   0 -10   2  983.00   37.80
   0 -10   2  938.91   20.20
   0 -10  -2  931.21   25.90
   0  10  -3   -2.30    3.20
   0  10  -3    4.90    1.50
   0  10   3    6.90    2.10
   0  10  -3   -3.10    4.70
   0  10   3   -0.50    2.70
   0  10  -3    5.10    2.40
   0  10   3   -0.40    7.00
   0 -10  -3    2.70    1.70
   0 -10   3    3.70    1.50
   0 -10   3    0.10    4.30
   0 -10  -3   -0.70    5.70
   0 -10   3    8.30    3.10
   0  10   4   71.89    3.30
   0  10  -4   83.39    4.90
   0  10  -4   74.49    7.00
   0  10   4   68.59    5.20
   0  10  -4   71.09   11.00
   0  10   4   72.79   16.20
   0  10  -4   82.69   10.20
   0  10   4   77.29    8.70
   0 -10  -4   90.99   17.30
   0 -10  -4   74.49    3.20
   0 -10   4   76.59    4.90
   0 -10  -4   74.09    6.40
   0 -10   4   75.99    9.70
   0 -10   4   67.79    6.70
   0  10   5    8.30    2.20
   0  10  -5    9.60    5.40
   0  10   5    4.10    3.60
   0  10  -5    7.90    2.20
   0  10  -5    6.50    5.10
   0  10   5   -3.60    8.30
   0  10   5    6.70    1.60
   0  10  -5    6.70    2.90
   0 -10   5    6.80    4.40
   0 -10  -5    8.50    8.00
   0 -10  -5    7.70    2.10
   0 -10  -5    6.90    1.60
   0 -10   5    6.40    2.20
   0 -10   5    5.30    2.80
   0  10   6  184.28    8.10
   0  10   6  176.78   14.00
   0  10  -6  179.68   11.40
   0  10  -6  183.78   13.20
   0  10   6  173.88   23.00
   0  10  -6  176.08   15.60
   0  10   6  175.38    7.50
   0  10  -6  181.28    9.20
   0 -10   6  170.78    9.00
   0 -10  -6  176.08    7.50
   0 -10  -6  173.28    7.90
   0 -10   6  172.28   10.90
   0 -10  -6  183.88   22.40
   0 -10   6  179.98   12.70
   0  10   7   32.00    4.20
   0  10   7   33.50    3.20
   0  10  -7   27.60    5.80
   0  10   7   19.00    6.10
   0  10  -7   28.90    7.80
   0  10   7   20.80   11.60
   0  10  -7   28.00    6.50
   0  10  -7   32.90    5.30
   0 -10  -7   25.50    3.60
   0 -10   7   18.40    5.20
   0 -10  -7   32.70    3.20
   0 -10   7   31.30    5.60
   0 -10   7   25.70    4.20
   0 -10  -7   25.10   11.00
   0  10  -8  428.86   16.90
   0  10   8  394.26   12.00
   0  10  -8  406.16   26.30
   0  10   8  406.96   35.70
   0  10   8  419.16   22.80
   0  10   8  416.76   14.80
   0  10  -8  420.06   19.10
   0  10  -8  418.96   17.70
   0 -10  -8  422.36   12.20
   0 -10  -8  418.16   14.70
   0 -10   8  402.76   16.50
   0 -10   8  409.16   17.50
   0 -10  -8  453.45   35.10
   0 -10   8  400.16   18.20
   0  10   9  125.29    8.20
   0  10   9  124.89    5.10
   0  10  -9  123.69   10.50
   0  10  -9   96.99    8.50
   0  10  -9  113.29    9.00
   0  10   9  109.59   13.20
   0  10  -9  100.69    8.50
   0  10  -9  137.89   20.00
   0 -10  -9  108.09   23.20
   0 -10   9  122.59   10.10
   0 -10  -9  123.09    5.20
   0 -10   9  100.49    8.60
   0 -10  -9  121.09    8.00
   0  10 -10  857.31   42.30
   0  10 -10  850.91   30.40
   0  10 -10  839.92   22.40
   0  10 -10  851.41   28.50
   0  10  10  856.31   26.10
   0  10  10  890.71   36.90
   0  10 -10  857.11   22.70
   0 -10 -10  810.52   51.19
   0 -10  10  837.42   32.50
   0 -10 -10  881.31   26.30
   0  10 -11   26.10    9.80
   0  10 -11   33.50    6.40
   0  10 -11   46.30    8.00
   0  10  11   40.20    6.70
   0  10  11   44.20   13.50
   0  10  11   24.00    8.70
   0 -10 -11   36.00    5.90
   0 -10  11   34.60    6.20
   0 -10 -11   20.20   17.00
   0  10  12  103.29    9.90
   0  10 -12  104.09   10.30
   0  10  12  112.39   17.80
   0  10 -12  107.59   20.50
   0  10 -12  101.49   10.40
   0 -10 -12  122.39   27.40
   0 -10 -12  103.89    9.20
   0  10  13    4.70   13.30
   0  10 -13    1.40    3.60
   0  10 -13    6.10   11.70
   0  10  13   -1.20    5.50
   0  10 -13   -0.20    4.30
   0  10  13    0.80    7.30
   0 -10 -13    2.50    4.10
   0 -10 -13   10.60   16.30
   0  10 -14  113.59   14.10
   0  10 -14  124.59   12.60
   0  10  14  135.49   19.80
   0  10 -14   90.59   18.40
   0 -10 -14  113.09   11.20
   0 -10 -14  122.59   31.40
   0  10 -15   42.70    8.50
   0  10 -15   43.90   10.10
   0  10  15   45.10   16.00
   0  10 -15   31.00   16.50
   0 -10 -15   37.00    7.70
   0 -10 -15   47.20   25.20
   0  10 -16  134.89   25.30
   0  10 -16  173.98   16.50
   0  10  16  148.69   24.20
   0  10 -16  186.08   15.90
   0 -10 -16  154.78   14.50
   0 -10 -16  154.48   39.50
   0  10  17   66.39   17.70
   0  10 -17   53.39   10.70
   0  10 -17   58.39   22.60
   0 -10 -17   32.30    9.00
   0  10 -18   85.99   15.10
   0  10 -18   51.29   25.80
   0  10  18   97.69   22.30
   0  11   0    1.80    3.40
   0  11   0    2.20    1.60
   0  11   0   -1.80    6.50
   0 -11   0   -0.50    1.80
   0 -11   0   -0.90    5.40
   0  11   1  520.25   18.40
   0  11  -1  502.35   29.10
   0  11   1  528.55   23.00
   0  11  -1  513.35   19.00
   0  11   1  508.45   31.80
   0  11  -1  502.45   23.20
   0 -11   1  475.15   18.40
   0 -11   1  521.05   28.90
   0 -11  -1  506.85   30.70
   0 -11  -1  496.95   18.10
   0  11   2   -0.10    2.70
   0  11  -2   -6.30    5.50
   0  11   2    3.70    8.30
   0  11  -2    0.30    3.20
   0  11  -2   -1.50    1.50
   0  11  -2    0.20    0.60
   0  11   2    0.40    1.60
   0 -11   2   -1.40    4.90
   0 -11   2    0.50    0.80
   0 -11   2    1.60    2.10
   0 -11  -2   -0.30    1.60
   0 -11  -2    3.60    6.60
   0  11  -3    3.20    6.10
   0  11  -3   -0.20    1.60
   0  11   3    2.20    1.80
   0  11  -3    4.70    1.40
   0  11   3    1.20    2.80
   0  11   3    4.10    8.40
   0  11  -3   -0.80    3.50
   0 -11   3    4.60    1.40
   0 -11  -3    5.00    7.40
   0 -11  -3    6.10    2.30
   0 -11   3    3.60    2.20
   0 -11   3    4.50    4.90
   0  11  -4    0.20    1.30
   0  11   4   -7.20    8.20
   0  11  -4    2.50    4.00
   0  11   4    0.00    1.50
   0  11   4    2.90    3.50
   0  11  -4    0.40    2.10
   0  11  -4    4.50    5.80
   0 -11   4   -0.50    2.10
   0 -11   4    1.00    1.40
   0 -11   4    3.30    5.00
   0 -11  -4   -0.10    7.20
   0 -11  -4   -0.20    1.50
   0  11   5    2.60    1.60
   0  11  -5    2.90    2.40
   0  11  -5    2.80    1.60
   0  11  -5   -0.80    5.60
   0  11   5    1.60    9.70
   0  11  -5    4.20    4.30
   0  11   5    0.80    1.10
   0  11   5    3.30    3.50
   0 -11   5    3.10    1.60
   0 -11   5    3.70    4.70
   0 -11  -5    2.10    8.10
   0 -11  -5    2.00    1.70
   0 -11  -5    2.10    1.20
   0  11   6   34.60   13.70
   0  11   6   15.70    2.50
   0  11  -6   26.60    7.40
   0  11  -6   24.40    5.50
   0  11   6   22.70    6.10
   0  11  -6   19.20    3.70
   0  11   6   26.20    3.90
   0  11  -6   14.00    6.70
   0 -11  -6   20.20    3.40
   0 -11  -6   25.60   12.50
   0 -11   6   16.20    3.40
   0 -11   6   14.90    5.90
   0 -11  -6   20.30    2.90
   0 -11   6   26.20    5.40
   0  11   7  487.55   14.80
   0  11   7  496.05   38.70
   0  11  -7  468.35   20.80
   0  11  -7  473.95   17.00
   0  11  -7  495.85   22.00
   0  11   7  485.55   15.00
   0  11   7  476.25   23.90
   0  11  -7  464.15   27.50
   0 -11  -7  487.95   14.90
   0 -11   7  517.45   21.60
   0 -11  -7  485.05   37.30
   0 -11   7  493.35   17.50
   0 -11   7  468.05   20.30
   0 -11  -7  450.75   14.50
   0  11   8   57.49    9.80
   0  11   8   68.89    5.60
   0  11   8   66.79    4.60
   0  11  -8   79.39   15.50
   0  11  -8   62.69    6.50
   0  11  -8   61.29    8.80
   0 -11   8   75.29   11.00
   0 -11   8   44.50    7.10
   0 -11  -8   48.70   16.20
   0 -11   8   61.79    6.90
   0 -11  -8   64.49    5.20
   0 -11  -8   63.89    4.50
   0  11  -9  437.86   20.70
   0  11  -9  469.85   16.80
   0  11  -9  472.45   17.30
   0  11   9  464.85   12.70
   0  11  -9  466.15   30.20
   0  11   9  424.56   24.40
   0  11   9  449.16   16.30
   0  11  -9  463.95   18.70
   0 -11  -9  437.96   16.00
   0 -11  -9  453.85   12.70
   0 -11   9  412.76   18.00
   0 -11  -9  456.25   39.00
   0  11 -10   74.99    8.10
   0  11  10   67.89    3.20
   0  11 -10   58.19    9.20
   0  11  10   61.29    7.20
   0  11 -10   86.39   18.20
   0  11  10   66.09   11.70
   0 -11 -10   65.69    3.50
   0 -11 -10   45.20   17.20
   0 -11  10   62.49    8.30
   0 -11 -10   65.99    6.50
   0  11  11  145.99   10.40
   0  11 -11  136.39   10.90
   0  11  11  133.29   16.30
   0  11 -11  155.08   20.50
   0  11 -11  133.39   11.70
   0 -11 -11  139.79   27.20
   0 -11  11  123.39   11.20
   0 -11 -11  142.19   10.10
   0  11 -12    2.70    3.90
   0  11  12   -9.80   12.60
   0  11 -12    0.20    8.20
   0  11 -12    8.70    5.00
   0  11  12   12.10    4.80
   0  11  12    9.30    7.50
   0 -11 -12    0.90   15.70
   0 -11 -12    5.20    3.60
   0  11  13   20.70   10.20
   0  11  13    1.50   16.10
   0  11  13   20.60    6.40
   0  11 -13   22.50    6.50
   0  11 -13   19.10    5.90
   0  11 -13   22.00   10.70
   0 -11 -13   -1.40   17.90
   0  11  14   19.50   18.00
   0  11 -14   21.10   13.60
   0  11 -14   28.50    7.60
   0  11 -14   29.50    7.60
   0 -11 -14   28.80    6.60
   0  11 -15  163.78   29.70
   0  11 -15  141.99   16.90
   0  11 -15  139.99   14.60
   0  11  15  169.08   23.30
   0 -11 -15  155.88   37.00
   0 -11 -15  133.89   13.00
   0  11 -16   59.99   10.50
   0  11 -16   98.19   24.90
   0  11  16   52.69   15.70
   0  11 -16   69.09   12.20
   0 -11 -16   38.30    8.50
   0  11  17   81.39   19.70
   0  11 -17   78.59   15.00
   0  11 -17   91.79   24.50
   0 -11 -17   82.69   12.70
   0  12   0 2269.37   74.59
   0  12   0 2299.67   54.69
   0 -12   0 2361.06   74.29
   0 -12   0 2211.08   54.19
   0  12   1    1.70    1.90
   0  12   1    0.90    4.10
   0  12  -1    7.10    8.20
   0  12  -1    1.80    1.90
   0  12   1    3.60    8.50
   0 -12  -1   -1.50    6.70
   0 -12   1   -1.30    2.10
   0 -12   1    3.50    5.90
   0 -12  -1    2.10    2.10
   0  12  -2 1184.28   47.40
   0  12  -2 1260.97   35.60
   0  12  -2 1134.59   47.40
   0  12   2 1267.17   33.70
   0  12   2 1251.87   55.09
   0  12   2 1244.18   40.40
   0 -12  -2 1224.78   33.40
   0 -12   2 1252.47   35.50
   0 -12  -2 1311.77   55.09
   0 -12   2 1209.08   46.60
   0  12   3    5.70    3.70
   0  12  -3    6.40    5.50
   0  12   3   12.50   10.90
   0  12  -3    6.80    1.50
   0  12   3    9.20    3.00
   0  12  -3    7.80    3.40
   0  12  -3    3.30    6.70
   0 -12   3    4.90    3.10
   0 -12   3    8.30    1.70
   0 -12   3    4.00    6.00
   0 -12  -3   11.40    3.30
   0 -12  -3    6.00    8.80
   0  12  -4   80.19    8.00
   0  12  -4   93.99   12.20
   0  12   4   81.49    6.70
   0  12   4   99.19   10.70
   0  12   4   99.69   20.10
   0  12  -4   82.39    4.80
   0 -12   4   86.79   15.20
   0 -12  -4   95.69   19.80
   0 -12  -4   88.29    6.80
   0 -12   4   96.29    8.50
   0 -12   4   88.69    5.20
   0  12  -5   14.10    7.80
   0  12  -5    8.60    3.60
   0  12   5   14.20    1.50
   0  12   5   11.80    5.90
   0  12  -5    9.50    2.40
   0  12   5    7.40   12.70
   0  12  -5    6.50    4.80
   0  12   5   10.40    3.00
   0 -12  -5   11.70    1.40
   0 -12  -5   15.20   11.00
   0 -12  -5   13.50    3.20
   0 -12   5   11.00    2.80
   0 -12   5    9.30    6.40
   0 -12   5   15.10    4.00
   0  12  -6  367.76   13.70
   0  12   6  381.86   14.00
   0  12   6  373.56   34.20
   0  12  -6  358.96   24.00
   0  12  -6  389.96   18.90
   0  12  -6  381.86   21.50
   0  12   6  374.76   21.20
   0  12   6  361.76   10.70
   0 -12   6  394.06   20.90
   0 -12  -6  362.26   13.80
   0 -12  -6  437.66   35.30
   0 -12  -6  375.96   10.70
   0 -12   6  376.76   14.10
   0  12  -7    1.60    2.30
   0  12   7    2.30    4.30
   0  12  -7    0.20    6.30
   0  12  -7    3.70    6.00
   0  12   7    1.10    1.90
   0  12   7    1.10    1.80
   0  12  -7    0.00    2.50
   0 -12   7    4.30    2.80
   0 -12   7    1.40    5.20
   0 -12  -7   -0.30    1.40
   0 -12  -7    1.40   10.30
   0  12   8 1161.98   27.70
   0  12   8 1111.29   31.30
   0  12  -8 1093.79   34.20
   0  12   8 1167.48   42.20
   0  12  -8 1125.59   31.60
   0  12  -8 1125.19   36.90
   0  12  -8 1197.68   48.80
   0 -12   8 1128.49   34.40
   0 -12  -8 1077.59   27.30
   0 -12  -8 1196.98   62.99
   0 -12  -8 1154.88   29.20
   0 -12   8 1145.79   32.00
   0  12   9    2.80    1.70
   0  12   9    1.40    4.80
   0  12  -9   -0.90    4.60
   0  12  -9    9.90    7.70
   0  12  -9    2.60    3.20
   0  12  -9    2.10    3.10
   0  12   9    5.50    2.60
   0 -12  -9    2.60    1.90
   0 -12   9   -1.20    3.10
   0 -12  -9    1.30    2.20
   0 -12  -9   -4.40   11.90
   0  12 -10 1023.70   48.30
   0  12  10 1038.50   28.30
   0  12 -10  992.10   31.20
   0  12  10  957.50   40.30
   0  12 -10  966.40   35.00
   0 -12 -10 1036.10   62.09
   0 -12  10  966.60   31.10
   0 -12 -10  956.20   22.10
   0 -12 -10  993.70   28.10
   0  12  11   28.60   10.10
   0  12 -11   37.30   13.60
   0  12  11   -3.10   10.80
   0  12  11   37.00    6.00
   0  12 -11   27.40    6.70
   0 -12  11   30.00    7.80
   0 -12 -11   30.80    5.80
   0 -12 -11   62.89   22.50
   0  12 -12   85.79   10.50
   0  12  12   92.29   16.20
   0  12  12   83.69    9.90
   0  12 -12   78.19   17.10
   0  12 -12   93.49   11.40
   0 -12 -12   96.19    9.10
   0 -12 -12  122.19   30.70
   0  12  13    8.40    6.20
   0  12  13  -16.00   15.80
   0  12 -13   -8.20   10.30
   0  12  13   14.20   10.10
   0  12 -13    7.90    5.20
   0  12 -13    4.30    4.90
   0  12 -14  138.29   14.50
   0  12 -14  101.99   19.80
   0  12  14  115.09   18.30
   0 -12 -14  183.98   39.20
   0 -12 -14  105.39   11.00
   0  12 -15   13.80   11.00
   0  12 -15   12.50   18.00
   0  12 -15    2.60    5.90
   0  12  15   -5.10   10.20
   0 -12 -15    4.40    5.60
   0  12 -16  258.77   19.70
   0  12 -16  257.07   22.80
   0  12 -16  214.28   33.00
   0  12  16  229.48   27.50
   0 -12 -16  249.88   17.40
   0  12 -17   19.20   23.60
   0  12  17    0.40   13.70
   0 -12 -17    7.80    7.60
   0  13   0    6.10    9.80
   0  13   0   -3.40    3.60
   0  13   0    2.20    2.30
   0 -13   0    1.40    2.50
   0 -13   0    4.60    7.40
   0  13   1   37.40    6.40
   0  13  -1   29.50   12.30
   0  13  -1   38.10    6.60
   0  13   1   26.70    7.10
   0  13   1   40.30   13.50
   0  13  -1   27.70    8.10
   0 -13  -1   41.40   12.90
   0 -13   1   55.89   12.70
   0 -13  -1   35.00    6.00
   0 -13   1   35.20    6.40
   0  13   2    7.50   10.20
   0  13   2    4.60    2.90
   0  13  -2    4.20    4.60
   0  13  -2    9.20    3.50
   0  13  -2    1.40    8.80
   0  13   2   -1.80    3.30
   0 -13  -2   -4.60    7.40
   0 -13   2    0.50    2.50
   0 -13  -2   -1.10    2.00
   0 -13   2    5.90    7.10
   0  13  -3   26.40    2.10
   0  13  -3   36.60    9.20
   0  13  -3   28.80    5.90
   0  13   3   27.40    5.00
   0  13  -3   36.30   11.80
   0  13   3   35.80    7.80
   0 -13  -3   23.50    4.60
   0 -13  -3   30.00   11.60
   0 -13   3   18.00    4.40
   0 -13   3   39.60   10.80
   0 -13   3   26.20    2.50
   0  13  -4    0.50    5.10
   0  13   4   -2.10   12.70
   0  13   4    1.10    2.20
   0  13  -4    0.30    1.50
   0  13  -4   -1.20    2.50
   0  13  -4    7.40    7.90
   0  13   4   -1.20    3.80
   0 -13  -4   -9.40    9.10
   0 -13  -4    0.60    2.10
   0 -13   4   -2.10    1.40
   0 -13   4    0.00    2.90
   0 -13   4    2.10    6.70
   0  13  -5    9.80    3.60
   0  13   5   20.00   13.50
   0  13   5   12.00    5.70
   0  13  -5   14.40    7.60
   0  13   5   14.60    3.90
   0  13  -5   12.90    2.70
   0 -13  -5   16.50    3.90
   0 -13   5   19.00    3.20
   0 -13  -5    9.90   12.10
   0  13   6   44.20    2.90
   0  13  -6   37.00    5.00
   0  13   6   47.20    5.40
   0  13  -6   39.90    9.40
   0  13  -6   44.00   10.80
   0  13  -6   43.10    7.10
   0  13   6   34.30    7.90
   0 -13  -6   49.00    5.50
   0 -13  -6   39.10   14.80
   0 -13  -6   40.40    2.70
   0 -13   6   23.10    8.40
   0 -13   6   40.00    5.20
   0  13   7  240.28   10.70
   0  13  -7  234.28   11.20
   0  13   7  218.98    8.20
   0  13   7  214.18   17.20
   0  13  -7  223.78   20.90
   0  13  -7  235.88   17.80
   0  13  -7  226.08   14.90
   0 -13  -7  221.78    8.10
   0 -13  -7  217.08   29.10
   0 -13   7  222.08   11.30
   0 -13  -7  214.68   10.30
   0 -13   7  206.58   16.10
   0  13   8   72.99    5.30
   0  13  -8   71.09    7.10
   0  13  -8   57.19   14.20
   0  13   8   78.29   13.50
   0  13  -8   64.89    9.80
   0  13  -8   61.39    9.00
   0 -13  -8   66.49    4.90
   0 -13  -8   61.89    6.10
   0 -13   8   57.69    9.50
   0 -13   8   65.69    7.30
   0 -13  -8   58.49   18.00
   0  13  -9    7.50    4.20
   0  13  -9    4.70    5.70
   0  13   9    8.40    3.00
   0  13   9    3.50    5.90
   0  13   9    4.50    2.00
   0  13  -9    7.20    3.50
   0  13  -9    2.90    7.10
   0 -13  -9    7.10   15.10
   0 -13  -9    4.90    2.70
   0 -13   9    5.60    4.20
   0 -13  -9    5.80    2.30
   0  13 -10   99.29    9.20
   0  13 -10   68.19   14.80
   0  13  10   94.39    8.10
   0  13 -10   92.29   10.70
   0  13  10   64.89   12.80
   0 -13 -10   99.49    7.30
   0 -13 -10   90.59    5.20
   0 -13 -10   85.99   23.90
   0 -13  10   99.19    9.90
   0  13  11   15.80    4.70
   0  13 -11    5.40    9.80
   0  13 -11   17.30    6.30
   0  13  11   18.40    9.00
   0  13 -11   17.20    6.20
   0 -13 -11   18.30    4.50
   0 -13 -11    4.50   16.00
   0  13 -12   11.50    5.20
   0  13 -12    7.60   13.60
   0  13  12   11.50    9.70
   0  13  12   -1.80   15.30
   0  13  12    1.90    9.20
   0  13 -12   14.10    6.80
   0 -13 -12   18.90   22.20
   0 -13 -12   12.10    4.40
   0  13  13   14.00   10.00
   0  13 -13    4.90    6.90
   0  13 -13   -2.10   12.30
   0  13  13   -3.60    5.80
   0  13 -13    8.30    5.90
   0 -13 -13   22.60   23.50
   0 -13 -13    6.50    4.20
   0  13  14   30.30   12.90
   0  13 -14   31.50    9.00
   0  13 -14   25.70    8.10
   0  13 -14   28.80   17.10
   0 -13 -14   36.60    7.00
   0 -13 -14   -6.70   25.70
   0  13 -15   39.10   11.70
   0  13 -15   44.90   18.80
   0  13 -15   40.90   10.20
   0  13  15   35.00   12.60
   0 -13 -15   35.90    7.60
   0  13 -16   72.09   13.40
   0  13  16   77.69   18.00
   0  13 -16   90.49   26.20
   0 -13 -16   72.09   10.50
   0  14   0  916.31   36.20
   0  14   0  892.51   47.50
   0  14   0  913.51   29.60
   0 -14   0  937.21   46.80
   0 -14   0  906.21   29.70
   0  14   1   -1.70    1.90
   0  14  -1   -5.30    4.20
   0  14   1    2.70    4.70
   0  14  -1    0.90    2.60
   0  14  -1    8.00   11.30
   0  14   1   -1.70   11.20
   0 -14   1   -5.20    7.50
   0 -14  -1    0.40    9.00
   0 -14  -1    0.80    3.10
   0 -14   1   -2.30    2.70
   0  14  -2  950.30   31.60
   0  14   2  934.81   36.30
   0  14  -2  950.70   38.50
   0  14  -2  949.71   45.60
   0  14   2 1011.70   30.10
   0  14   2  945.01   51.99
   0 -14  -2  956.80   29.80
   0 -14  -2 1030.10   51.39
   0 -14   2  960.10   43.70
   0 -14   2  964.00   31.60
   0  14  -3    7.70   10.40
   0  14  -3   20.80    7.70
   0  14  -3   13.10    6.80
   0  14   3   12.60   14.70
   0  14   3   15.80    6.50
   0  14   3   23.60    4.90
   0 -14  -3    6.30   10.00
   0 -14   3   14.40    8.70
   0 -14   3   23.30    8.60
   0 -14  -3   16.10    3.80
   0  14  -4   13.30   10.40
   0  14   4   13.10    3.70
   0  14  -4    9.90    3.80
   0  14  -4   12.30    7.20
   0  14   4   25.30   16.10
   0  14   4   13.80    6.60
   0  14  -4   11.50    2.00
   0 -14   4    9.40    2.10
   0 -14  -4   11.60   12.50
   0 -14   4    8.60    8.30
   0 -14  -4   11.60    3.70
   0  14  -5   16.10   10.40
   0  14  -5   39.60    3.90
   0  14   5   36.70    5.50
   0  14   5   35.70    9.10
   0  14  -5   18.90    8.40
   0  14  -5   38.50    7.10
   0 -14   5   24.40    9.50
   0 -14  -5   28.30   13.60
   0 -14  -5   31.80    5.20
   0 -14   5   36.80    4.10
   0  14  -6 1043.40   35.40
   0  14  -6  959.60   42.90
   0  14   6 1030.10   28.70
   0  14   6 1011.90   39.00
   0 -14  -6  996.10   28.80
   0 -14  -6  969.10   57.39
   0 -14   6 1054.59   27.00
   0  14  -7   12.20    8.60
   0  14   7    5.30    1.60
   0  14  -7    6.30    2.80
   0  14   7    2.90    5.70
   0  14  -7   10.30    8.20
   0  14   7    9.00    3.00
   0  14  -7   10.00    4.50
   0 -14   7    3.50    7.10
   0 -14  -7    4.90   13.20
   0 -14  -7    7.70    3.20
   0 -14   7    6.30    3.40
   0 -14  -7    6.20    1.50
   0  14  -8 1431.86   43.60
   0  14  -8 1552.24   59.39
   0  14   8 1442.36   35.60
   0  14  -8 1503.25   38.10
   0  14   8 1457.65   50.09
   0  14  -8 1513.45   46.60
   0  14   8 1450.45   32.40
   0 -14   8 1475.05   38.50
   0 -14  -8 1522.55   75.69
   0 -14  -8 1512.25   32.40
   0 -14  -8 1407.56   35.70
   0 -14   8 1458.85   43.50
   0  14  -9   -1.20    3.10
   0  14   9    0.20    2.20
   0  14  -9   -1.00    3.70
   0  14  -9    0.40    5.80
   0  14   9    4.40    6.00
   0  14  -9    0.90    7.40
   0 -14   9   -0.60    5.50
   0 -14   9    0.30    4.00
   0 -14  -9    2.40   14.70
   0  14  10  759.52   22.90
   0  14  10  787.42   37.00
   0  14 -10  839.72   45.90
   0  14 -10  820.12   27.40
   0  14 -10  811.72   33.10
   0 -14 -10  828.92   23.20
   0 -14  10  795.62   27.70
   0 -14 -10  813.72   20.80
   0 -14 -10  877.41   60.99
   0  14 -11    3.00    4.70
   0  14 -11    4.80    5.10
   0  14  11    4.40   11.40
   0  14 -11   -0.70   10.20
   0  14  11    9.50    4.20
   0 -14 -11   -1.10   20.60
   0 -14 -11    5.30    3.50
   0  14 -12   24.10   14.90
   0  14  12   22.20   19.60
   0  14  12   19.80    5.50
   0  14 -12   19.90    6.60
   0  14  12   30.30   11.00
   0  14 -12   36.50    8.70
   0 -14 -12   44.00   24.00
   0 -14 -12   36.30    6.40
   0  14 -13   10.80    6.40
   0  14  13    9.70    6.70
   0  14 -13    8.70   13.60
   0  14  13   -2.40    9.20
   0  14 -13   15.30    7.10
   0 -14 -13    4.60    4.50
   0 -14 -13    9.10   22.20
   0  14  14  155.58   21.80
   0  14 -14  164.38   29.00
   0  14 -14  174.68   15.40
   0 -14 -14  158.98   12.80
   0  14  15    7.10   12.60
   0  14 -15    3.10    8.50
   0  14 -15    7.20   16.20
   0 -14 -15    2.50    6.00
   0  15   0    1.50    4.60
   0  15   0   -1.60    2.50
   0  15   0    2.80   12.90
   0 -15   0  -11.00    9.20
   0 -15   0    4.20    3.50
   0  15   1  120.39   10.10
   0  15  -1  151.28   24.40
   0  15  -1  124.09   12.50
   0  15  -1  119.69   13.90
   0  15   1  112.19   13.10
   0  15   1  148.99   24.70
   0 -15   1   98.39   18.50
   0 -15  -1  124.99   22.40
   0 -15  -1  126.09   10.40
   0  15  -2   10.50    4.10
   0  15   2   10.40    3.60
   0  15  -2   13.50    7.00
   0  15  -2    9.80   12.80
   0  15   2    3.70   14.10
   0  15   2    4.10    4.90
   0 -15  -2    7.10    3.70
   0 -15  -2   12.10   11.30
   0 -15   2   10.30    9.50
   0  15  -3   38.30   15.00
   0  15   3   61.69   11.80
   0  15   3   36.00    6.20
   0  15  -3   39.70    7.10
   0  15   3   50.79   24.40
   0  15  -3   56.59   11.40
   0 -15  -3   46.80   19.00
   0 -15   3   24.80   10.80
   0  15  -4    6.00    3.80
   0  15   4   12.40    5.90
   0  15  -4    0.20    1.10
   0  15   4    1.50    2.50
   0  15  -4    7.80    6.60
   0  15  -4    2.00   11.50
   0 -15   4   -7.10    8.10
   0 -15  -4    7.90    3.60
   0 -15   4    1.60    1.40
   0 -15  -4   -7.60   11.10
   0  15   5   14.90    4.00
   0  15  -5    9.80    7.80
   0  15  -5   13.10    2.40
   0  15  -5   11.50   11.10
   0  15   5    9.90    5.70
   0  15  -5   12.20    5.00
   0 -15  -5   14.80    4.40
   0 -15   5   11.80    2.80
   0 -15   5    5.80    9.30
   0 -15  -5    5.30   12.10
   0  15   6    3.80    2.90
   0  15  -6    5.50   10.30
   0  15  -6   -0.20    2.30
   0  15  -6    2.60    3.60
   0  15   6    1.00    5.30
   0  15  -6    7.10    7.90
   0 -15   6    8.10    8.90
   0 -15  -6    0.80   12.90
   0 -15  -6    6.10    3.50
   0  15   7   32.30    9.60
   0  15  -7   20.70    6.30
   0  15  -7   28.80   11.50
   0  15  -7   32.20    4.50
   0  15  -7   30.60   11.30
   0  15   7   25.20    4.80
   0 -15  -7   28.90   17.00
   0 -15  -7   23.00    4.90
   0 -15   7   31.00    4.80
   0 -15   7   36.20   10.00
   0  15  -8   51.69   14.20
   0  15  -8   37.60    5.60
   0  15   8   41.70    5.30
   0  15   8   27.30    8.40
   0  15  -8   38.70    8.50
   0 -15  -8   36.00    5.30
   0 -15  -8   35.40    2.90
   0 -15   8   39.80   10.00
   0 -15  -8   42.10   18.00
   0 -15   8   49.50    6.40
   0  15  -9    3.80    6.20
   0  15   9    1.70    2.50
   0  15   9    5.60    6.80
   0  15  -9   27.90   13.10
   0  15  -9    5.20    5.20
   0  15  -9    1.70    3.60
   0  15   9    4.10    2.60
   0 -15  -9    7.60    2.60
   0 -15   9    3.70    6.40
   0 -15  -9   10.70    3.50
   0 -15  -9    5.30   16.60
   0 -15   9   10.10    4.60
   0  15  10   71.49   15.00
   0  15 -10   77.79    8.40
   0  15 -10  105.89   21.50
   0  15 -10   81.39   13.20
   0 -15 -10   78.19    6.40
   0 -15  10   80.89    9.70
   0 -15 -10   89.49    6.30
   0 -15 -10   65.09   38.00
   0  15  11    2.30    4.30
   0  15  11   -1.30    1.50
   0  15 -11    9.80    6.10
   0  15  11    3.80    8.40
   0  15 -11    6.10    4.90
   0 -15 -11    4.50    3.40
   0 -15 -11   12.10   21.30
   0 -15 -11    9.70    2.50
   0  15 -12    9.00    6.30
   0  15 -12    3.40   14.60
   0  15  12   -7.00    6.20
   0  15 -12   11.30    5.90
   0  15  12   15.40    9.70
   0 -15 -12   14.00    4.70
   0 -15 -12   14.30   23.40
   0  15 -13   -4.60   14.70
   0  15  13   28.20   11.00
   0  15 -13    6.20    6.60
   0 -15 -13   17.20    5.10
   0  15 -14   -1.60    7.70
   0  15 -14  -10.70   16.00
   0  15  14   -6.00   10.50
   0 -15 -14    9.60    5.80
   0  16   0 1156.98   36.50
   0  16   0 1124.19   43.30
   0  16   0 1120.79   58.09
   0 -16   0 1112.79   54.89
   0  16   1    6.50   16.00
   0  16   1   -1.00    3.30
   0  16   1   -5.10    5.20
   0  16  -1    2.20    5.60
   0  16  -1    1.70    3.30
   0 -16  -1   -5.10   11.10
   0 -16   1    0.10    9.90
   0  16   2  531.15   22.00
   0  16  -2  533.55   29.70
   0  16  -2  543.05   39.50
   0  16   2  533.15   28.20
   0  16  -2  535.75   23.50
   0 -16  -2  562.54   41.10
   0 -16   2  477.95   33.90
   0 -16  -2  519.35   21.80
   0  16   3   11.40    3.90
   0  16  -3    6.70    6.70
   0  16  -3   19.20   14.70
   0  16   3    1.20    5.50
   0  16  -3   11.70    5.20
   0 -16   3    4.30   10.40
   0 -16  -3   21.80   15.00
   0 -16  -3    8.00    4.20
   0  16   4   47.80    6.90
   0  16  -4   47.40    8.10
   0  16   4   59.19   12.00
   0  16  -4   58.49   16.30
   0  16  -4   31.80   10.00
   0 -16  -4   54.89   19.60
   0 -16   4   46.60   13.70
   0 -16  -4   51.79    7.70
   0  16  -5    1.90    1.50
   0  16  -5    7.50   12.10
   0  16   5    6.40    3.60
   0  16  -5    8.90    4.90
   0  16   5   11.50    7.00
   0  16  -5    3.30    6.90
   0 -16  -5   -0.20   13.30
   0 -16   5   11.40    2.60
   0 -16   5   -3.50    9.70
   0  16  -6  232.08   24.70
   0  16  -6  213.08   22.70
   0  16  -6  218.78   16.10
   0  16   6  228.78   12.60
   0  16   6  244.18   19.90
   0 -16  -6  233.98   34.10
   0 -16  -6  211.18   12.70
   0 -16   6  197.38   20.70
   0 -16   6  234.98    9.80
   0  16  -7   30.80   11.90
   0  16   7   28.10    9.80
   0  16  -7   26.90    7.00
   0  16   7   26.90    5.10
   0 -16   7   21.50    4.60
   0 -16  -7   17.70    4.70
   0 -16   7   30.90   12.10
   0 -16  -7   29.00   19.40
   0  16  -8  791.62   32.90
   0  16  -8  783.02   43.10
   0  16   8  690.43   42.30
   0 -16   8  726.53   30.70
   0 -16  -8  720.93   23.40
   0 -16  -8  770.82   57.29
   0 -16   8  778.92   23.80
   0  16  -9    0.50    3.40
   0  16   9    4.00    2.80
   0  16   9    8.90    7.50
   0  16  -9    3.40    6.70
   0  16  -9    3.70    5.50
   0  16  -9    7.70   12.10
   0 -16   9    8.70    7.00
   0 -16   9    5.30    4.50
   0 -16  -9    7.00    1.80
   0 -16  -9    3.00    3.60
   0  16 -10  446.76   25.20
   0  16 -10  517.35   38.40
   0  16  10  445.16   29.20
   0 -16 -10  452.35   13.30
   0 -16 -10  433.96   18.60
   0 -16  10  484.95   20.20
   0 -16 -10  426.96   50.19
   0  16 -11   -0.70    5.10
   0  16 -11   -4.40    5.60
   0  16  11   -1.00    2.10
   0  16 -11    6.40   13.00
   0  16  11    5.80    8.80
   0 -16 -11   16.10   24.90
   0 -16 -11   -3.00    3.00
   0  16 -12    9.00   15.10
   0  16  12    6.20    9.90
   0  16 -12   14.90    6.80
   0 -16 -12   16.90    4.70
   0  16  13   -9.90   10.10
   0  16 -13   28.60    8.20
   0  16 -13   19.10   14.60
   0  16  14  110.89   19.70
   0  16 -14   96.49   12.80
   0  16 -14   59.79   22.90
   0  17   0   -1.00    5.90
   0  17   0    4.10    3.70
   0  17   0  -15.10   17.60
   0  17   1  130.89   11.40
   0  17   1  125.29   15.80
   0  17  -1  132.99   11.80
   0  17  -1  126.19   25.90
   0  17  -1  105.29   15.70
   0 -17   1  131.99   23.30
   0 -17  -1  142.69   25.10
   0  17  -2    3.40    7.10
   0  17   2   12.30    7.40
   0  17  -2    8.20   16.70
   0  17  -2   10.70    5.10
   0  17   2    6.40    3.50
   0 -17  -2   20.30   15.50
   0 -17   2    4.90   12.00
   0  17  -3   32.50    7.70
   0  17   3   41.60   11.20
   0  17  -3   43.10   11.40
   0  17   3   46.60    7.50
   0  17  -3   34.40   17.40
   0 -17   3   48.10   15.60
   0 -17  -3   33.40   17.90
   0  17   4   17.90    5.00
   0  17  -4   13.80    8.80
   0  17  -4   29.30   16.90
   0  17  -4    7.20    4.80
   0  17   4   21.50    8.90
   0 -17  -4   14.10    5.00
   0 -17   4    7.00   11.30
   0 -17  -4   32.80   16.60
   0  17   5   14.70    4.80
   0  17  -5   16.70   10.10
   0  17  -5   12.60   15.10
   0  17  -5    9.50    5.80
   0  17   5   16.00    8.40
   0 -17  -5   21.20    5.40
   0 -17   5   20.30   12.50
   0 -17  -5   17.30   16.70
   0  17  -6    4.90    4.90
   0  17  -6   -7.80   13.10
   0  17   6    5.20    3.60
   0  17  -6   -0.60    2.00
   0  17   6    5.90    9.50
   0  17  -6    1.60    8.60
   0 -17   6    6.80   11.30
   0 -17  -6   -4.00   17.30
   0 -17   6    4.30    2.80
   0 -17  -6    4.20    4.40
   0  17   7  454.85   28.40
   0  17   7  448.66   18.30
   0 -17  -7  406.66   45.00
   0 -17   7  423.16   28.20
   0 -17   7  430.16   14.90
   0 -17  -7  406.86   19.50
   0  17   8    1.90    3.50
   0  17  -8   25.40    7.50
   0  17  -8    0.40    3.00
   0  17   8    4.60    8.40
   0  17  -8   31.40   14.90
   0  17  -8   15.40   11.80
   0 -17  -8   16.10   20.20
   0 -17   8   13.70    5.10
   0 -17   8    2.90   10.10
   0 -17  -8   12.60    5.10
   0  17   9  278.77   23.80
   0  17  -9  289.27   20.50
   0  17  -9  279.87   29.20
   0 -17  -9  298.87   44.70
   0 -17   9  253.77   14.60
   0 -17   9  262.27   15.20
   0  17 -10    7.00    4.80
   0  17  10   18.80   10.00
   0  17 -10   36.40   15.30
   0 -17 -10   35.50   33.30
   0  17 -11   65.99   20.50
   0  17  11   44.90   13.10
   0  17 -12    9.00   16.30
   0  17 -12   -0.10    6.70
   0  17  12   24.40   12.10
   0  17 -13    1.40    7.40
   0  17 -13    2.50   16.40
   0  17  13   30.20   12.90
   0  18   0  473.35   28.90
   0  18   0  411.36   21.50
   0 -18   0  467.75   38.60
   0  18   1    0.30    7.00
   0  18   1    3.00    3.80
   0  18  -1    5.20    7.10
   0  18  -1    8.30    4.80
   0 -18   1   -3.90   13.30
   0 -18  -1   -8.50   14.60
   0  18   2   50.99    8.70
   0  18  -2   58.69   13.60
   0  18   2   74.39   15.50
   0  18  -2   65.59   10.60
   0  18  -2   90.79   23.40
   0 -18   2   54.79   18.40
   0 -18  -2   67.69   20.40
   0  18  -3    6.10    4.70
   0  18  -3   14.60   19.10
   0  18   3    4.20    4.70
   0  18  -3   -1.40    9.50
   0 -18  -3    9.00   17.00
   0 -18   3    2.10   13.40
   0  18   4    9.50    4.70
   0  18  -4    8.30   11.30
   0  18   4    4.50    7.00
   0  18  -4   -2.90   17.50
   0  18  -4    8.10    5.80
   0 -18   4    5.60   14.30
   0 -18  -4   -7.40   16.90
   0  18   5    4.40    4.20
   0  18  -5    1.50    8.80
   0  18  -5    3.40    7.50
   0  18   5   -1.30    6.90
   0  18  -5   -3.60   17.30
   0 -18  -5  -18.40   18.60
   0 -18   5    2.80   13.30
   0  18   6   46.20    7.80
   0  18  -6   42.30    9.00
   0  18  -6   -3.30   16.00
   0  18   6   35.90   11.00
   0  18  -6   34.30   13.50
   0 -18  -6   58.39   24.20
   0 -18  -6   27.30    6.80
   0 -18   6   43.70   15.20
   0  18  -7   41.20   15.50
   0  18  -7  -10.90   14.90
   0  18   7   22.20   10.70
   0  18  -7   29.80    8.30
   0 -18  -7   16.60    6.20
   0 -18  -7   24.40   21.90
   0 -18   7   17.50   13.70
   0  18   8  241.58   22.50
   0  18  -8  240.58   19.30
   0  18  -8  261.27   28.60
   0 -18  -8  289.97   43.30
   0 -18   8  246.48   24.60
   0  18   9   27.20   10.70
   0  18  -9   18.30   12.80
   0  18  10   88.89   16.20
   0  18 -10   73.49   20.40
   0  18  11    1.90   10.40
   0  18 -11   -0.20    6.30
   0  18 -11   17.10   15.20
   0  19   0   -0.70    8.10
   0  19   0   -3.90    4.40
   0 -19   0    8.60   15.70
   0  19   1  718.23   36.90
   0  19  -1  652.63   29.20
   0  19   1  727.63   29.30
   0  19  -1  724.83   38.00
   0 -19  -1  750.52   52.19
   0 -19   1  750.52   50.09
   0  19  -2   18.90    6.30
   0  19  -2   17.20   10.20
   0  19   2   12.00    6.00
   0  19   2    8.50    8.40
   0 -19  -2   13.20   19.50
   0 -19   2   15.00   15.80
   0  19   3   81.19   10.10
   0  19  -3   63.39   15.20
   0  19   3   74.69   14.20
   0  19  -3   44.80   24.90
   0 -19  -3   75.69   23.80
   0  19  -4   34.60   23.20
   0  19   4   16.10    9.10
   0  19  -4   16.40   10.70
   0  19   4   13.60    5.80
   0  19  -4   17.00    7.00
   0 -19   4    9.60   15.90
   0 -19  -4   10.50   19.90
   0  19   5   54.49   13.50
   0  19  -5   45.20   10.00
   0  19   5   54.49    8.40
   0  19  -5    1.50   20.60
   0  19  -5   65.79   16.10
   0 -19   5   69.59   19.90
   0  19  -6    2.90   11.20
   0  19  -6    5.60    6.40
   0  19   6   -0.30    4.60
   0  19   6    2.90    8.70
   0 -19  -6  -14.20   20.30
   0 -19   6   -0.10   15.10
   0  19  -7  350.86   32.20
   0  19   7  331.97   26.50
   0 -19   7  305.57   28.70
   0 -19  -7  346.57   47.20
   0  19   8    1.00    4.90
   0  19   8    8.30    9.70
   0  19  -8   -6.80   12.40
   0  19  -9  460.45   38.40
   0  19   9  504.35   32.90
   0  19 -10   -7.90   14.50
   0  19  10   17.60   11.80
   0  20   0    0.60    9.60
   0  20   0    6.10    5.40
   0 -20   0   -5.10   18.60
   0  20  -1  -11.30    8.60
   0  20  -1    2.20    6.20
   0  20   1    7.30    5.90
   0  20   1    8.00    8.40
   0 -20   1   36.80   19.80
   0 -20  -1    2.50   19.60
   0  20   2   -0.50    8.40
   0  20  -2   -9.40    9.20
   0  20  -2    1.30    5.50
   0  20   2   -1.50    5.00
   0 -20  -2   -5.70   19.70
   0 -20   2    0.80   17.70
   0  20   3    4.40    5.80
   0  20  -3   -3.20    5.50
   0  20   3    4.50    8.70
   0  20  -3    7.10   10.70
   0 -20   3   -0.90   17.40
   0 -20  -3    1.60   21.90
   0  20   4   24.60    6.90
   0  20   4    8.30    9.80
   0  20  -4   13.30   11.80
   0  20  -4   10.30    7.20
   0 -20  -4    0.40   23.60
   0  20   5    4.40    5.60
   0  20  -5    4.50   11.70
   0  20   5    2.50    9.40
   0 -20   5    9.20   18.10
   0 -20  -5   -0.30   22.90
   0  20   6   51.59   13.80
   0  20  -6   78.69   19.60
   0 -20   6   51.39   19.50
   0  20   7   -0.80    5.20
   0  20  -7   11.60   14.60
   0  20   7   14.00   10.80
   0  20   8   29.40   12.30
   0  20   8    7.00    5.70
   0  20  -8   15.40   16.40
   0  21   0   14.60   10.90
   0  21   0   -2.00    6.10
   0 -21   0   11.90   22.30
   0  21   1  546.65   27.00
   0  21  -1  535.85   35.10
   0  21   1  535.15   34.20
   0  21  -1  522.45   27.10
   0 -21  -1  559.34   52.49
   0 -21   1  604.84   50.29
   0  21  -2    5.20    9.50
   0  21  -2   16.10   12.60
   0  21   2   16.90   11.10
   0 -21  -2   -2.70   23.40
   0 -21   2   23.90   23.20
   0  21   3  169.68   21.30
   0  21  -3  183.48   25.60
   0  21   3  168.38   15.20
   0 -21  -3  161.68   37.00
   0 -21   3  160.28   28.80
   0  21   4   20.40    8.10
   0  21   4   30.60   12.30
   0  21  -4   37.80   14.90
   0 -21   4   32.00   22.90
   0 -21  -4  -17.00   26.80
   0  21  -5  123.29   22.60
   0  21   5  113.29   19.70
   0  21   5  127.29   13.70
   0  21   6    0.80    6.70
   0  21  -6   -5.80   12.90
   0  21   6   -4.30   10.40
   0  22   0  182.38   25.60
   0  22   1   -7.40    8.80
   0  22  -1   -3.80   11.20
   0  22   1   -2.80   10.50
   0 -22  -1   17.40   27.80
   0 -22   1   23.00   25.60
   0  22  -2   49.30   15.70
   0  22   2   49.80   15.70
   0  22   2   42.60   10.50
   0 -22   2   51.19   27.80
   0 -22  -2   55.19   30.70
   0  22  -3    6.10   13.10
   0  22   3   10.60    7.90
   0  22   3   15.30   11.90
   0 -22   3   -7.30   25.80
   1   0 -20   13.20   27.30
   1   0 -19   -2.40   22.30
  -1   0  19   -0.90    3.30
   1   0 -18   47.50   10.50
   1   0 -18   73.39   22.80
  -1   0  17   -0.30    3.30
   1   0 -17    3.30   15.60
   1   0 -17    1.70    5.80
   1   0 -17   -6.70   18.60
  -1   0  17    2.10    2.90
  -1   0  16   -0.30    2.80
  -1   0  16   -0.80    2.30
   1   0 -16    4.70    5.10
   1   0 -16   -6.00   14.50
   1   0 -16   -1.80   13.60
   1   0 -15   -2.60    3.80
  -1   0  15   -1.50    2.40
   1   0 -15   -2.70   11.80
   1   0 -15   -1.20   12.80
  -1   0  15   -0.30    2.00
   1   0 -14  146.59   12.40
  -1   0  14  177.98    9.10
   1   0 -14  139.89   20.10
  -1   0  14  187.48   24.10
   1   0 -14  147.39   21.40
  -1   0  14  188.68    9.40
   1   0 -13   -2.80    2.90
  -1   0  13    1.10    1.90
  -1   0  13   18.40   11.00
   1   0 -13    8.10    8.80
   1   0 -12  403.16   18.90
  -1   0  12  326.87   24.80
   1   0 -12  394.46   28.10
  -1   0  12  431.36   19.20
  -1   0  12  403.76   15.40
  -1   0  12  414.66   16.50
  -1   0  11   11.20    8.30
  -1   0  11    2.50    7.10
  -1   0  11    1.20    1.30
   1   0 -11    0.30    2.20
   1   0 -11    1.30    1.40
  -1   0  11    2.40    2.50
   1   0 -11    1.50    6.00
  -1   0  10  143.19    9.50
  -1   0  10  151.58    7.30
  -1   0  10  106.19   13.50
   1   0 -10  106.99   14.10
   1   0 -10  143.59    9.70
   1   0 -10  137.79    7.00
   1   0  -9   -0.40    1.60
   1   0  -9   -3.50    4.20
  -1   0   9    0.30    1.00
  -1   0   9    4.30    4.90
  -1   0   9    0.10    4.30
  -1   0   9    6.40    2.70
   1   0  -9    1.60    1.20
   1   0  -8    9.70    5.10
  -1   0   8    8.00    2.90
  -1   0   8   11.40    2.30
   1   0  -8    5.60    2.40
  -1   0   8   17.50    6.00
   1   0  -8   11.50    2.20
  -1   0   8    7.40    5.30
   1   0  -7    0.40    1.30
  -1   0   7    0.10    1.30
  -1   0   7   -0.70    2.90
  -1   0   7    2.30    3.40
   1   0  -7    1.10    0.80
   1   0  -7    1.40    3.00
  -1   0   7    1.50    1.00
  -1   0   6   72.09    4.00
   1   0  -6   68.29    7.50
   1   0  -6   67.69    7.80
   1   0  -6   75.39    4.10
  -1   0   6   70.49    5.00
   1   0  -6   62.59    5.00
  -1   0   6   52.89    7.10
  -1   0   6  101.39   11.50
   1   0  -5   -0.10    0.80
  -1   0   5   -0.20    2.10
   1   0  -5   -0.30    1.90
  -1   0   5    2.20    1.10
   1   0  -5    3.00    1.00
   1   0  -5    1.30    2.10
  -1   0   5    1.60    0.70
  -1   0   5    3.40    3.80
   1   0  -4   32.80    4.30
   1   0  -4   35.40    2.30
  -1   0   4   29.60    4.40
   1   0  -4   33.60    2.90
   1   0  -4   33.10    4.40
  -1   0   4   33.80    2.30
  -1   0   4   28.50    4.70
  -1   0   4   32.40    2.80
   1   0  -3    4.20    1.20
  -1   0   3    1.60    0.70
  -1   0   3    1.30    1.50
  -1   0   3    1.30    0.50
   1   0  -3   -0.10    1.00
   1   0  -3    2.10    0.70
  -1   0   3    1.40    1.30
   1   0  -2   45.00    2.10
  -1   0   2   47.50    3.50
  -1   0   2   47.50    2.40
   1   0  -2   42.10    3.40
   1   0  -2   48.20    2.40
  -1   0   2   48.10    2.20
  -1   0   2   40.70    3.30
  -1   0   1    0.50    0.30
   1   0  -1    0.50    0.40
  -1   0  -1    1.00    0.70
   1   0   1    2.90    1.20
  -1   0  -1    1.20    0.50
   1   0   1    1.10    0.50
   1   0   1    1.30    0.30
  -1   0  -2    5.20    0.80
  -1   0  -2    3.70    1.30
   1   0   2    5.50    0.70
   1   0   2    3.80    1.40
  -1   0  -2    3.40    1.60
   1   0   2    5.00    1.10
  -1   0  -2    2.00    1.30
  -1   0  -2    4.60    1.10
  -1   0  -3    1.80    2.10
  -1   0  -3    6.00    1.50
   1   0   3    0.70    1.20
   1   0   3    1.30    1.70
  -1   0  -3    0.00    1.60
   1   0   3    3.70    1.30
  -1   0  -3    2.10    0.60
   1   0   3    1.10    0.50
   1   0   4   28.40    5.50
  -1   0  -4   41.90    5.10
  -1   0  -4   48.90    2.50
  -1   0  -4   40.10    5.70
  -1   0  -4   44.20    3.70
   1   0   4   50.39    2.60
   1   0   4   48.80    3.70
   1   0   5    0.50    0.60
  -1   0  -5   -0.10    2.10
  -1   0  -5    2.50    0.90
   1   0   5    1.90    2.60
   1   0   5    0.90    1.10
  -1   0  -5    1.80    1.10
   1   0   5    0.90    1.80
  -1   0  -5    1.00    2.60
  -1   0  -6  144.89   12.30
  -1   0  -6  171.58    6.10
   1   0   6  159.98    8.20
   1   0   6  126.59   11.50
  -1   0  -6  154.98    8.40
   1   0   6  167.38    6.00
  -1   0  -6  159.38   11.90
   1   0   7   -0.60    1.10
   1   0   7    1.60    3.60
  -1   0  -7    7.50    2.50
   1   0   7    0.60    0.80
  -1   0  -7   -0.50    3.30
   1   0   7    4.30    3.40
  -1   0  -7    1.40    0.80
  -1   0  -7   -1.40    3.40
  -1   0  -8   58.19   11.10
  -1   0  -8   96.89   15.30
  -1   0  -8   65.09    4.20
   1   0   8   74.19   10.70
  -1   0  -8   68.39    6.40
   1   0   8   65.69    6.20
   1   0   8   68.69    4.10
   1   0   9    0.10    0.90
  -1   0  -9    0.90    5.50
  -1   0  -9    0.60    1.70
  -1   0  -9    2.10    5.10
  -1   0  -9    3.50    4.90
  -1   0  -9    0.40    1.00
   1   0   9    0.10    1.90
   1   0   9   -1.50    4.30
  -1   0 -10   26.70    9.70
  -1   0 -10   38.10    3.60
  -1   0 -10   35.20    9.00
   1   0  10   33.90    8.70
   1   0  10   35.40    5.60
   1   0  10   39.40    3.70
  -1   0 -10   52.99    7.70
  -1   0 -10   26.60    8.50
  -1   0 -11    7.20    3.50
  -1   0 -11    0.80    1.40
   1   0  11    1.70    2.80
  -1   0 -11    6.30    7.60
   1   0  11    0.30    1.50
  -1   0 -11    0.30    6.50
  -1   0 -11   -2.60    7.40
   1   0  11   -6.00    6.50
  -1   0 -12  198.48   22.30
  -1   0 -12  193.48   13.30
  -1   0 -12  142.19   18.80
  -1   0 -12  191.48    8.60
   1   0  12  180.58   12.60
   1   0  12  188.18    8.40
   1   0  12  174.38   19.70
  -1   0 -13   -0.30    1.60
  -1   0 -13    0.70   10.20
   1   0  13    0.80    1.90
  -1   0 -13    0.00    3.40
  -1   0 -13    1.00   10.70
   1   0  13    8.20   10.00
  -1   0 -14   57.79   17.30
   1   0  14   75.19    6.00
  -1   0 -14   72.59   11.10
   1   0  14   81.89   18.40
   1   0  15    1.70    2.10
  -1   0 -15   -1.80   13.10
  -1   0 -15   -5.50   14.90
  -1   0 -15   -4.70    4.10
   1   0  15   -2.30    2.40
   1   0  15  -13.40   15.20
  -1   0 -16   28.60    8.60
   1   0  16   -0.20    2.60
   1   0  17    0.30    3.20
   1   0  17   -0.40    2.40
  -1   0 -17    3.60    6.00
  -1   0 -17  -18.90   18.30
  -1   0 -18    0.10   22.40
  -1   0 -18    5.20   11.40
  -1   0 -19   -6.40   26.20
   1   1 -20  -38.50   26.20
   1   1 -19   -1.30   23.40
   1  -1 -19    7.30   24.10
  -1  -1  19   -4.50    3.90
   1   1 -18  181.28   29.40
   1   1 -18  195.98   30.40
   1  -1 -18  200.28   31.40
   1  -1 -18  178.28   16.70
   1   1 -17    2.40    6.00
   1   1 -17    5.20   17.50
  -1   1  17   -0.40    2.40
  -1   1  17   -0.10    2.80
   1   1 -17    5.40   15.20
  -1  -1  17    3.00    4.00
  -1  -1  17    1.50    3.10
   1  -1 -17   -4.30   15.80
   1  -1 -17    7.90    6.60
   1   1 -16    5.10    5.50
   1   1 -16   -4.40   12.60
   1   1 -16  -13.80   13.30
  -1   1  16    0.80    2.10
  -1   1  16    7.30    3.20
   1  -1 -16   -6.00   14.00
   1  -1 -16   11.50    6.10
   1  -1 -16   -1.90   16.00
  -1  -1  16    6.50    3.60
  -1  -1  16    3.00    2.90
  -1   1  15    1.40    2.10
   1   1 -15   -0.20    4.30
   1   1 -15    2.30   11.30
  -1   1  15    4.20   15.90
  -1   1  15    0.30    2.20
   1   1 -15    0.20   11.60
   1  -1 -15    7.50    4.80
  -1  -1  15    2.80    2.60
   1  -1 -15    2.90   11.50
  -1  -1  15    1.50    2.50
  -1   1  14  743.63   40.90
   1   1 -14  734.53   39.90
   1   1 -14  657.93   27.80
   1   1 -14  678.53   21.50
  -1   1  14  663.33   39.50
   1   1 -14  721.43   37.00
  -1   1  14  696.03   20.30
  -1  -1  14  714.23   21.90
   1  -1 -14  723.73   42.30
   1  -1 -14  702.93   28.40
   1   1 -13    1.30    8.30
  -1   1  13   12.40    9.70
  -1   1  13    4.80    2.10
  -1   1  13    4.80    1.90
  -1   1  13    7.30   11.20
   1   1 -13   -1.50    8.80
  -1   1  13    1.60    4.50
   1   1 -13    8.30    2.80
   1   1 -13   -0.10    3.10
   1  -1 -13    4.80    9.50
  -1  -1  13   18.60   14.60
  -1  -1  13    6.30    2.60
   1   1 -12 2716.33   66.49
  -1   1  12 2643.54   56.29
  -1   1  12 2721.93   79.49
  -1   1  12 2738.33   56.69
   1   1 -12 2825.62   81.79
   1   1 -12 2714.33   76.09
   1   1 -12 2659.03   58.79
  -1   1  12 2661.23   65.59
  -1   1  12 2764.32   83.09
  -1  -1  12 2680.23   78.69
   1  -1 -12 2646.44   65.79
  -1  -1  12 2764.92   58.89
  -1  -1  12 2667.43   65.69
   1  -1 -12 2812.92   86.19
   1   1 -11   11.90    7.20
   1   1 -11   12.50    2.80
   1   1 -11   12.00    3.80
  -1   1  11   13.50    2.60
  -1   1  11    9.90    8.10
  -1   1  11   13.70    2.70
  -1   1  11    4.30    5.50
  -1   1  11   19.70    4.60
  -1  -1  11   10.30    3.50
  -1  -1  11   16.80    8.10
   1  -1 -11   18.00    8.70
  -1  -1  11   16.20    3.30
   1  -1 -11   12.30    4.20
  -1   1  10 1545.35   33.60
   1   1 -10 1526.05   50.59
  -1   1  10 1473.15   52.39
   1   1 -10 1472.75   35.10
   1   1 -10 1523.85   40.50
  -1   1  10 1452.75   33.10
  -1   1  10 1464.75   39.60
   1   1 -10 1487.45   51.49
  -1   1  10 1500.05   49.99
  -1  -1  10 1462.55   34.80
  -1  -1  10 1482.95   39.80
  -1  -1  10 1473.45   48.10
  -1  -1  10 1486.25   49.10
   1  -1 -10 1568.44   55.09
   1  -1 -10 1513.45   40.20
  -1   1   9   10.20    3.20
   1   1  -9   17.10    4.30
   1   1  -9    8.20    5.10
  -1   1   9   15.60    2.40
   1   1  -9    7.80    5.20
   1   1  -9   18.90    3.30
  -1   1   9   20.00    9.40
  -1   1   9   15.90    2.50
  -1   1   9   15.10    6.20
   1  -1  -9   18.90    4.10
  -1  -1   9   13.50    2.70
  -1  -1   9   13.00    3.80
   1  -1  -9   12.60    7.40
  -1  -1   9   13.80    5.60
  -1  -1   9   12.10    5.20
   1   1  -8  136.59    6.90
   1   1  -8  147.39    8.80
  -1   1   8  149.88   14.30
   1   1  -8  144.29   12.50
  -1   1   8  148.29    6.20
  -1   1   8  162.38    9.00
   1   1  -8  146.49   12.70
  -1   1   8  141.69    6.10
  -1  -1   8  147.19    8.80
   1  -1  -8  135.79    8.40
  -1  -1   8  122.09   11.90
  -1  -1   8  143.19    6.80
   1  -1  -8  152.28   14.50
  -1  -1   8  144.19   12.00
   1   1  -7   14.80    4.40
   1   1  -7   18.10    2.80
  -1   1   7   15.60    2.30
  -1   1   7   25.20    4.30
   1   1  -7   16.50    5.40
  -1   1   7   21.10    6.80
   1   1  -7   14.80    3.00
  -1   1   7    8.70    4.40
  -1   1   7   12.40    2.00
   1  -1  -7   11.80    5.30
  -1  -1   7   13.30    3.00
  -1  -1   7   14.60    4.70
  -1  -1   7    7.60    3.30
  -1  -1   7   14.10    2.40
  -1   1   6 2485.35   63.79
  -1   1   6 2428.36   60.29
   1   1  -6 2415.36   60.59
  -1   1   6 2477.15   48.80
   1   1  -6 2457.45   50.29
  -1   1   6 2416.76   48.50
   1   1  -6 2454.25   52.99
   1   1  -6 2453.05   59.09
  -1   1   6 2448.06   52.59
  -1  -1   6 2461.65   58.19
  -1  -1   6 2546.65   60.29
  -1  -1   6 2439.46   49.99
   1  -1  -6 2547.34   64.59
   1  -1  -6 2505.45   52.89
  -1  -1   6 2491.05   52.99
  -1   1   5    1.60    3.30
  -1   1   5    4.50    1.70
  -1   1   5    2.40    0.80
  -1   1   5    2.40    0.80
   1   1  -5    1.70    0.90
   1   1  -5    1.10    1.00
   1   1  -5    5.40    2.80
   1   1  -5    1.80    1.90
  -1  -1   5    2.20    2.10
   1  -1  -5    3.50    2.80
   1  -1  -5    3.00    1.20
  -1  -1   5    3.50    1.10
  -1  -1   5    2.00    2.10
  -1  -1   5    2.80    1.50
   1   1  -4 1186.78   25.90
  -1   1   4 1240.68   32.60
  -1   1   4 1188.68   24.70
   1   1  -4 1187.28   31.80
   1   1  -4 1233.88   27.40
   1   1  -4 1234.78   30.00
  -1   1   4 1203.18   27.00
  -1   1   4 1255.37   35.10
  -1   1   4 1178.08   24.50
  -1  -1   4 1252.77   27.40
  -1  -1   4 1223.48   31.60
   1  -1  -4 1209.38   34.80
  -1  -1   4 1226.98   29.80
  -1  -1   4 1206.18   25.90
   1  -1  -4 1186.88   26.90
  -1   1   3   11.30    3.00
   1   1  -3    9.20    1.50
  -1   1   3   11.20    1.10
  -1   1   3   10.90    1.10
   1   1  -3    5.90    1.90
  -1   1   3   10.50    1.60
   1   1  -3   10.30    1.30
   1   1  -3    9.90    2.00
  -1  -1   3    9.80    1.70
   1  -1  -3   10.40    1.10
  -1  -1   3   18.60    3.90
   1  -1  -3    9.60    1.60
   1  -1  -3   11.90    3.20
  -1  -1   3    9.90    1.50
  -1  -1   3    8.80    1.80
   1   1  -1    0.40    0.40
  -1   1   1    1.10    0.30
   1   1  -1    1.20    0.40
   1   1  -1    0.80    0.40
  -1   1   1    0.80    0.90
   1   1  -1    1.00    0.30
  -1   1   1    0.90    0.30
   1  -1  -1    0.20    0.50
  -1  -1   1    0.70    0.50
   1  -1  -1    1.30    1.00
  -1  -1   1    0.80    0.40
   1   1   1    0.50    1.00
   1   1   1    0.10    0.30
  -1   1  -1    0.00    0.70
   1   1   1   -0.20    0.50
  -1   1  -1    0.50    0.40
  -1   1  -1   -0.20    0.70
  -1   1  -1    0.30    0.30
   1  -1   1   -0.30    0.70
   1  -1   1    0.30    0.30
  -1  -1  -1    0.30    0.40
   1  -1   1   -0.10    0.50
   1  -1   1    0.40    0.40
  -1  -1  -1    0.00    0.90
   1   1   2 3031.70   65.19
  -1   1  -2 3062.79   61.59
   1   1   2 2950.50   57.59
  -1  -1  -2 2970.40   60.49
  -1  -1  -2 2950.90   65.39
   1  -1   2 2915.11   60.59
   1  -1   2 3104.59   62.09
  -1  -1  -2 3025.80   57.79
  -1   1  -3    2.50    1.80
  -1   1  -3    0.70    1.40
   1   1   3    3.50    1.10
   1   1   3    1.80    1.40
   1   1   3   -0.20    1.70
   1   1   3    1.60    0.40
  -1   1  -3    0.50    0.80
  -1   1  -3    1.90    0.70
  -1  -1  -3    2.40    2.00
   1  -1   3    3.50    2.30
  -1  -1  -3    3.00    1.60
  -1  -1  -3    1.60    0.40
   1  -1   3    1.40    1.00
   1  -1   3    2.60    0.80
  -1  -1  -3   -0.20    0.70
  -1   1  -4 7758.42  148.89
   1   1   4 7391.26  147.79
  -1   1  -4 7692.13  150.28
  -1   1  -4 7559.44  149.09
   1   1   4 7592.04  153.68
  -1  -1  -4 7358.46  154.18
  -1  -1  -4 7213.08  148.19
   1  -1   4 7707.23  148.29
  -1   1  -5    0.50    2.40
   1   1   5    0.70    1.80
  -1   1  -5    5.90    3.20
  -1   1  -5    2.60    2.70
  -1   1  -5    2.30    0.90
  -1   1  -5    0.40    0.90
   1   1   5    1.80    1.30
   1   1   5    2.00    0.60
   1   1   5    2.50    3.20
  -1  -1  -5    1.50    3.00
  -1  -1  -5    2.30    0.70
   1  -1   5    2.90    1.00
   1  -1   5    1.60    1.30
  -1  -1  -5    0.20    1.10
  -1  -1  -5    1.00    2.50
  -1   1  -6 5211.78  114.99
  -1   1  -6 5226.38  104.39
  -1   1  -6 5313.17  112.49
   1   1   6 5389.06  112.39
  -1   1  -6 5243.68  113.19
   1   1   6 5224.18  103.69
   1   1   6 5180.68  117.19
  -1   1  -6 5220.98   99.79
   1   1   6 5143.89   97.29
  -1  -1  -6 5133.49   97.29
   1  -1   6 5357.06  105.49
   1  -1   6 5046.60  110.59
  -1  -1  -6 5287.67  104.19
  -1  -1  -6 5226.08  113.09
  -1  -1  -6 5301.17  119.39
   1  -1   6 5193.18   99.69
  -1   1  -7    1.70    3.60
   1   1   7    4.20    1.10
   1   1   7    4.10    4.40
  -1   1  -7    6.30    2.50
   1   1   7    2.20    1.90
  -1   1  -7    4.00    3.90
  -1   1  -7    8.30    4.30
  -1   1  -7    4.60    1.40
   1  -1   7    2.80    5.20
   1  -1   7    5.00    1.60
  -1  -1  -7    4.50    3.50
  -1  -1  -7    3.90    4.10
  -1  -1  -7    5.40    1.30
  -1  -1  -7    3.30    2.10
   1  -1   7    2.40    2.00
   1   1   8 1492.55   51.09
   1   1   8 1553.54   47.20
  -1   1  -8 1567.14   50.39
  -1   1  -8 1542.35   48.60
  -1   1  -8 1527.55   39.50
   1   1   8 1558.44   39.00
  -1   1  -8 1493.95   46.80
  -1   1  -8 1537.65   34.30
   1   1   8 1518.35   31.90
  -1  -1  -8 1560.74   32.20
   1  -1   8 1558.44   46.60
   1  -1   8 1534.75   39.00
  -1  -1  -8 1531.15   48.60
  -1  -1  -8 1537.65   39.40
   1  -1   8 1555.94   34.10
  -1  -1  -8 1536.85   53.49
  -1   1  -9   15.40    6.10
  -1   1  -9   13.40    2.50
   1   1   9   11.10    6.70
   1   1   9    8.50    6.10
   1   1   9   13.80    2.00
   1   1   9   13.70    3.60
  -1   1  -9   13.60    6.70
  -1   1  -9    9.70    3.20
   1  -1   9   12.90    2.50
  -1  -1  -9    5.70    6.30
   1  -1   9   24.70    5.20
  -1  -1  -9   11.20    3.50
   1  -1   9   12.20    6.10
  -1  -1  -9   14.80    2.20
   1   1  10  627.84   33.40
   1   1  10  586.24   22.10
  -1   1 -10  620.04   23.20
   1   1  10  670.33   30.90
   1   1  10  623.44   16.00
  -1   1 -10  649.54   30.60
  -1   1 -10  588.74   17.80
  -1   1 -10  627.54   31.80
  -1   1 -10  650.53   33.50
   1  -1  10  605.84   22.50
   1  -1  10  616.84   29.50
  -1  -1 -10  626.94   35.10
  -1  -1 -10  609.04   16.00
  -1  -1 -10  603.84   22.80
   1  -1  10  614.44   17.80
   1   1  11    0.90    7.10
  -1   1 -11    4.10    1.60
   1   1  11    3.80    1.50
  -1   1 -11    1.90    6.80
  -1   1 -11   -4.10    8.90
   1   1  11    0.20    3.40
  -1   1 -11    9.20    7.30
  -1   1 -11    0.20    2.40
  -1  -1 -11    5.90    7.70
   1  -1  11    0.90    1.90
  -1  -1 -11    3.50    2.90
  -1  -1 -11    1.80    1.30
   1  -1  11    5.70    3.30
   1  -1  11    9.70    7.40
   1   1  12 1391.66   31.30
   1   1  12 1349.47   51.49
   1   1  12 1372.06   40.80
  -1   1 -12 1391.86   51.89
  -1   1 -12 1358.76   54.79
  -1   1 -12 1407.46   42.00
  -1   1 -12 1432.96   57.29
   1   1  12 1443.46   31.50
  -1   1 -12 1381.86   34.00
   1  -1  12 1372.46   51.39
   1  -1  12 1390.76   33.70
  -1  -1 -12 1470.85   56.69
  -1  -1 -12 1460.15   60.19
  -1  -1 -12 1360.36   41.40
  -1   1 -13    2.10    3.90
   1   1  13    3.80    1.90
  -1   1 -13   13.70   10.30
   1   1  13    1.90   10.40
  -1   1 -13    2.10    9.50
  -1   1 -13    4.50    2.40
   1   1  13    6.30    2.10
   1  -1  13    6.40    2.50
  -1  -1 -13    5.30   10.10
  -1  -1 -13    4.40   11.30
  -1  -1 -13    6.70    3.80
   1   1  14  328.57   29.70
   1   1  14  346.97   11.50
   1   1  14  351.26   11.70
  -1   1 -14  344.67   19.90
  -1   1 -14  353.46   13.90
  -1   1 -14  361.66   29.00
  -1   1 -14  383.16   31.60
  -1  -1 -14  391.66   34.40
   1  -1  14  341.97   13.50
   1  -1  14  307.77   28.60
  -1  -1 -14  352.76   32.20
  -1  -1 -14  360.76   20.10
  -1   1 -15    6.70    5.50
   1   1  15    3.10    2.20
   1   1  15    9.00   16.30
  -1   1 -15    5.30    2.80
  -1   1 -15   -2.80   13.10
  -1   1 -15   -6.20   13.70
   1   1  15    0.30    1.60
   1  -1  15   15.40   17.80
  -1  -1 -15    9.40   14.50
  -1  -1 -15    4.30   16.30
  -1  -1 -15    2.90    4.60
   1  -1  15    3.70    2.90
   1   1  16  104.79   25.60
  -1   1 -16   99.29   13.10
  -1   1 -16   92.39   22.90
  -1   1 -16  100.79   22.50
  -1  -1 -16   72.69   11.60
  -1  -1 -16  118.29   25.60
   1  -1  16   98.89    7.90
   1   1  17   -0.30    2.50
  -1   1 -17  -17.20   18.00
   1   1  17    0.70    2.00
  -1   1 -17   -4.60    5.90
   1  -1  17    2.00    2.90
   1  -1  17    1.60    3.80
  -1  -1 -17    6.70    7.60
  -1  -1 -17    0.80   19.20
  -1   1 -18   13.00   22.30
   1   1  18    1.30    2.70
  -1  -1 -18   23.00   24.10
  -1  -1 -18    9.70    8.50
  -1   1 -19   35.40   26.50
  -1  -1 -19    4.30   28.00
   1   2 -20  -31.50   24.90
   1  -2 -20  103.19   34.80
   1   2 -19    7.80   21.70
  -1  -2  19    2.80    4.20
   1  -2 -19   35.80   27.30
   1   2 -18   28.10    9.40
  -1   2  18    1.10    2.90
   1   2 -18   31.20   20.90
  -1   2  18    1.40    2.30
   1   2 -18   -9.70   16.90
  -1  -2  18   -1.60    3.70
  -1  -2  18    9.10    5.80
   1  -2 -18   30.70   22.10
   1  -2 -18   27.60    8.50
   1   2 -17   26.20   16.40
   1   2 -17   38.30   14.00
   1   2 -17   19.80   17.50
  -1  -2  17   17.60    4.90
   1  -2 -17   16.10    7.10
   1  -2 -17   27.20   18.40
  -1  -2  17   20.00    5.10
   1   2 -16    3.90   12.60
   1   2 -16   -0.10    4.40
  -1   2  16    0.00    2.00
  -1   2  16    0.30    2.10
   1   2 -16    8.70   13.80
   1   2 -16    1.40    3.10
  -1  -2  16    3.80    3.90
   1  -2 -16    2.00    5.20
  -1  -2  16    4.10    3.30
   1  -2 -16    2.80   14.50
   1   2 -15   19.70   11.80
   1   2 -15   23.90   12.30
   1   2 -15   25.10    7.30
  -1   2  15   32.90   15.90
   1   2 -15   29.70    5.40
  -1   2  15   12.50   16.00
  -1   2  15   34.50    3.60
  -1   2  15   36.20    4.10
   1  -2 -15   25.90    7.10
   1  -2 -15   27.00   15.20
  -1  -2  15   35.40    5.50
   1   2 -14  153.68   12.80
   1   2 -14  146.99    9.30
   1   2 -14  146.79   20.00
  -1   2  14  167.88   23.00
  -1   2  14  137.29    7.10
  -1   2  14  141.39    6.90
   1  -2 -14  126.09   11.40
   1  -2 -14  127.89   23.20
  -1  -2  14  144.69    9.40
   1   2 -13   52.39    8.30
  -1   2  13   44.80    3.90
  -1   2  13   54.79   14.70
   1   2 -13   63.19    6.00
  -1   2  13   43.20    8.10
  -1   2  13   34.80    9.90
   1   2 -13   46.80   11.80
  -1   2  13   47.10    4.30
   1   2 -13   53.49   12.30
  -1  -2  13   59.29   13.70
  -1  -2  13   46.60    5.40
   1  -2 -13   47.40   14.50
  -1   2  12  297.37   10.00
  -1   2  12  235.28   23.10
   1   2 -12  287.57   15.80
   1   2 -12  274.47   21.50
  -1   2  12  297.67   16.00
  -1   2  12  303.67   10.30
  -1   2  12  283.37   23.50
   1   2 -12  301.97   24.10
   1   2 -12  292.77   12.80
   1  -2 -12  228.18   23.60
  -1  -2  12  294.77   15.90
  -1  -2  12  308.07   12.90
   1  -2 -12  305.37   16.00
  -1  -2  12  285.67   23.60
   1   2 -11  384.36   21.90
  -1   2  11  360.96   11.30
   1   2 -11  363.16   14.10
  -1   2  11  373.06   11.70
  -1   2  11  350.26   23.70
   1   2 -11  360.36   23.00
  -1   2  11  394.56   27.50
  -1   2  11  361.26   16.70
   1   2 -11  375.86   17.40
   1   2 -11  377.26   25.00
   1  -2 -11  364.06   16.80
  -1  -2  11  324.67   16.30
  -1  -2  11  415.86   31.70
  -1  -2  11  365.76   13.90
   1  -2 -11  364.36   27.40
   1   2 -10   77.69    5.90
   1   2 -10   71.39    7.00
   1   2 -10  103.39   15.90
  -1   2  10   96.09   14.40
   1   2 -10   72.59   11.90
  -1   2  10   80.19   15.00
   1   2 -10   54.89    9.30
  -1   2  10   81.09    4.50
  -1   2  10   79.79    4.60
  -1   2  10   77.39    7.20
  -1  -2  10   77.69    7.30
   1  -2 -10   92.59    7.60
   1  -2 -10   80.69   14.90
  -1  -2  10   83.99    6.00
  -1  -2  10   95.29   13.60
   1   2  -9  324.27   12.60
  -1   2   9  305.37    9.90
   1   2  -9  358.06   21.60
  -1   2   9  317.17   20.20
  -1   2   9  338.67   14.40
   1   2  -9  353.86   15.00
   1   2  -9  343.87   19.20
  -1   2   9  313.77    9.80
   1   2  -9  348.67   17.80
  -1   2   9  309.37   22.60
  -1  -2   9  310.17   14.30
   1  -2  -9  330.87   14.30
  -1  -2   9  338.87   20.00
  -1  -2   9  342.07   14.10
   1  -2  -9  332.57   23.40
  -1   2   8   -0.10    3.30
  -1   2   8    1.40    5.50
   1   2  -8   -2.30    2.70
  -1   2   8    2.10    1.00
   1   2  -8    0.20    2.80
  -1   2   8    1.60    0.80
  -1   2   8    3.10    1.90
   1   2  -8    3.00    1.90
   1   2  -8    0.50    1.00
  -1  -2   8   -2.10    3.80
   1  -2  -8   -0.90    1.20
  -1  -2   8    0.10    2.00
  -1  -2   8   -0.80    1.00
   1   2  -7  437.46   21.10
  -1   2   7  428.86   11.50
   1   2  -7  433.56   13.90
   1   2  -7  420.26   15.40
  -1   2   7  432.86   23.70
  -1   2   7  425.36   11.20
  -1   2   7  434.26   20.90
   1   2  -7  436.66   18.70
  -1   2   7  526.05   22.50
  -1  -2   7  434.56   13.80
  -1  -2   7  459.55   15.80
  -1  -2   7  443.96   20.30
   1  -2  -7  444.86   24.20
   1   2  -6  113.39    5.80
  -1   2   6  105.39    4.20
   1   2  -6   99.09    7.80
  -1   2   6  106.89    9.50
   1   2  -6  110.99    6.60
   1   2  -6   96.59    9.10
  -1   2   6  104.49    6.20
  -1   2   6   94.19   10.60
  -1   2   6  106.09    4.40
  -1  -2   6  113.39    6.60
   1  -2  -6  113.89    6.50
   1  -2  -6  109.29   11.20
  -1  -2   6  107.39    9.10
  -1  -2   6  114.19    5.70
  -1   2   5   31.10    3.20
   1   2  -5   33.40    3.30
   1   2  -5   26.20    2.70
  -1   2   5   28.50    2.00
  -1   2   5   28.70    1.90
   1   2  -5   34.10    4.10
  -1   2   5   31.90    6.70
  -1  -2   5   28.40    3.70
  -1  -2   5   25.90    2.60
  -1  -2   5   38.50    6.50
   1  -2  -5   28.70    3.60
   1  -2  -5   42.00    8.30
   1   2  -4   44.00    3.40
  -1   2   4   45.60    6.60
  -1   2   4   45.50    3.30
   1   2  -4   47.80    3.30
   1   2  -4   43.80    4.90
   1   2  -4   31.60    2.90
  -1   2   4   41.20    2.20
   1   2  -4   35.70    3.30
   1  -2  -4   41.50    2.20
   1  -2  -4   44.60    6.20
  -1  -2   4   39.00    4.60
  -1  -2   4   50.29    3.30
   1  -2  -4   48.90    3.30
  -1  -2   4   43.40    3.30
   1   2  -3 2394.66   44.50
  -1   2   3 2412.46   56.99
   1   2  -3 2344.57   46.90
   1   2  -3 2288.57   46.70
   1   2  -3 2383.16   44.90
  -1   2   3 2344.57   44.60
  -1   2   3 2338.97   46.30
   1   2  -3 2389.36   50.99
   1  -2  -3 2317.37   44.70
  -1  -2   3 2374.66   46.90
   1  -2  -3 2348.57   56.49
  -1  -2   3 2311.17   46.60
   1  -2  -3 2357.36   46.30
  -1  -2   3 2361.56   50.39
  -1   2   2   23.00    1.60
  -1   2   2   16.30    3.60
  -1   2   2   13.90    2.30
   1   2  -2   18.40    1.60
   1   2  -2   23.00    1.90
  -1   2   2   21.90    1.40
   1   2  -2   20.60    2.40
   1  -2  -2   16.40    3.80
   1  -2  -2   21.10    1.50
   1  -2  -2   21.80    1.50
  -1  -2   2   22.10    1.80
  -1  -2   2   20.10    1.80
  -1   2   1   68.49    2.30
  -1   2   1   75.89    4.20
  -1   2   1   72.29    5.60
   1   2  -1   75.29    3.50
   1   2  -1   68.59    2.50
   1   2  -1   70.89    3.10
   1   2  -1   77.69    3.90
  -1   2   1   70.79    2.90
  -1  -2   1   74.39    2.60
   1  -2  -1   74.09    2.90
  -1  -2   1   78.99    4.00
   1  -2  -1   65.09    5.20
   1  -2  -1   65.09    2.20
  -1  -2   1   72.89    3.40
  -1  -2   1   74.79    3.20
  -1   2   0    0.10    0.30
  -1   2   0    0.50    1.00
   1   2   0    0.00    0.40
  -1   2   0   -0.40    0.70
   1   2   0    0.20    0.90
   1   2   0    0.20    0.30
  -1   2   0    0.30    0.20
  -1  -2   0    0.10    0.30
   1  -2   0    0.20    0.30
  -1  -2   0   -0.20    0.20
   1  -2   0    0.20    0.20
  -1  -2   0    0.10    0.30
   1  -2   0    0.30    0.90
  -1  -2   0    0.00    0.40
   1  -2   0    0.30    0.80
  -1  -2   0    0.00    0.90
  -1   2  -1  192.48    6.00
  -1   2  -1  181.68    5.40
   1   2   1  194.78    9.70
   1   2   1  182.58    4.60
   1   2   1  179.68    5.10
  -1   2  -1  176.68    7.60
   1  -2   1  185.68    7.80
  -1  -2  -1  175.18    4.50
   1  -2   1  178.58    7.30
  -1  -2  -1  178.38    9.50
   1  -2   1  188.88    5.90
  -1  -2  -1  187.68    5.20
   1  -2   1  179.08    5.40
   1   2   2    2.60    0.30
  -1   2  -2    2.00    0.80
  -1   2  -2    1.70    0.80
  -1   2  -2    1.20    1.10
   1   2   2    2.20    2.30
   1   2   2    2.70    0.90
  -1   2  -2    1.30    1.30
   1  -2   2    2.60    1.50
  -1  -2  -2    3.00    0.30
   1  -2   2    2.80    0.90
   1  -2   2    2.30    1.40
  -1  -2  -2    3.20    2.20
   1  -2   2    2.10    0.80
  -1  -2  -2    3.00    0.90
   1   2   3 3761.82   73.49
  -1   2  -3 3968.30   74.49
   1   2   3 3775.92   85.39
  -1   2  -3 3659.03   78.99
  -1   2  -3 3782.52   77.59
  -1  -2  -3 3864.41   85.99
   1  -2   3 3902.41   78.89
   1  -2   3 3885.81   78.29
  -1  -2  -3 3709.33   73.49
   1  -2   3 3798.92   73.99
   1   2   4   52.49    7.50
  -1   2  -4   68.19    4.50
  -1   2  -4   58.99    6.20
   1   2   4   57.49    5.90
   1   2   4   58.69    4.00
  -1   2  -4   59.79    3.70
   1  -2   4   58.89    3.60
  -1  -2  -4   51.69    7.30
  -1  -2  -4   54.69    4.00
   1  -2   4   57.39    4.10
   1  -2   4   58.49    5.70
  -1   2  -5 1627.24   37.70
   1   2   5 1609.64   31.00
   1   2   5 1723.13   50.09
  -1   2  -5 1660.03   35.60
  -1   2  -5 1629.84   44.20
   1   2   5 1681.63   43.60
   1   2   5 1629.54   31.00
  -1   2  -5 1704.83   44.20
  -1   2  -5 1656.23   42.10
   1   2   5 1668.23   37.30
   1  -2   5 1608.34   35.40
  -1  -2  -5 1668.33   37.50
  -1  -2  -5 1724.93   51.19
   1  -2   5 1661.73   37.60
   1   2   6   93.29   11.30
   1   2   6  111.99    6.70
  -1   2  -6   94.69    9.40
   1   2   6  117.19    9.80
   1   2   6  111.69    3.40
  -1   2  -6  105.19    6.90
  -1   2  -6  115.39    5.90
   1   2   6  109.89    3.40
   1  -2   6  116.19    5.90
  -1  -2  -6   92.49   11.50
  -1  -2  -6  109.69    6.90
   1  -2   6  111.49    9.60
  -1   2  -7  742.93   29.10
   1   2   7  720.33   15.50
   1   2   7  738.33   15.60
   1   2   7  720.43   28.10
  -1   2  -7  724.73   19.60
  -1   2  -7  717.53   26.80
   1   2   7  715.13   32.90
  -1   2  -7  719.43   29.20
  -1   2  -7  779.82   23.10
   1   2   7  755.92   22.20
   1  -2   7  757.82   19.60
  -1  -2  -7  730.63   22.20
   1  -2   7  743.23   22.30
  -1   2  -8   28.70    7.90
   1   2   8   30.40    4.80
  -1   2  -8   31.80    3.60
   1   2   8   38.70    9.60
  -1   2  -8   31.10    7.60
   1   2   8   26.70    8.80
   1   2   8   35.50    2.30
   1   2   8   38.00    2.30
  -1   2  -8   23.10    4.20
  -1   2  -8   20.00    6.00
   1  -2   8   28.10    4.80
  -1  -2  -8   36.00    5.10
   1  -2   8   32.90    3.50
  -1  -2  -8   33.50    9.80
   1  -2   8   35.60    7.60
   1   2   9    7.80    1.50
  -1   2  -9    8.60    4.40
   1   2   9    2.30    6.50
  -1   2  -9    9.00    3.20
   1   2   9    5.80    1.20
   1   2   9    9.50    3.30
  -1   2  -9    3.70    5.10
   1   2   9    7.00    4.60
  -1   2  -9    6.80    2.30
  -1   2  -9    1.30    4.70
   1  -2   9    6.70    2.10
  -1  -2  -9    7.30    6.10
   1  -2   9    2.90    5.10
   1  -2   9    5.30    2.70
  -1  -2  -9    6.50    2.90
   1   2  10   51.09    6.90
  -1   2 -10   39.20    8.70
   1   2  10   42.00    8.20
  -1   2 -10   63.19    5.20
  -1   2 -10   55.29   11.40
  -1   2 -10   53.79   10.90
  -1   2 -10   64.39    7.10
   1   2  10   53.39    3.20
   1   2  10   42.40   12.10
   1   2  10   53.89    3.20
   1  -2  10   62.09    5.20
   1  -2  10   69.99    9.00
   1  -2  10   57.39   10.40
  -1  -2 -10   46.80   12.30
  -1  -2 -10   54.79    7.50
   1   2  11   24.80   10.60
  -1   2 -11   21.10    5.30
  -1   2 -11   11.10    8.40
   1   2  11   18.50    2.20
   1   2  11   20.80    2.40
  -1   2 -11   21.30    3.90
   1   2  11   18.10    8.30
  -1   2 -11   14.60   11.20
  -1   2 -11   14.20    7.70
  -1  -2 -11   19.00    4.70
   1  -2  11   20.70    8.60
   1  -2  11   22.50    3.90
   1  -2  11   16.30    4.60
  -1  -2 -11   16.90    9.80
   1   2  12  102.59   16.40
  -1   2 -12   91.59    9.40
   1   2  12   92.19    9.50
  -1   2 -12  104.19   18.40
   1   2  12  104.09    4.70
  -1   2 -12   83.39   15.00
   1   2  12   77.89   17.30
   1   2  12  102.69    4.80
  -1   2 -12   64.19   13.00
  -1   2 -12  107.79    7.30
   1  -2  12  110.79   20.70
   1  -2  12   92.99    6.90
  -1  -2 -12   92.09    9.10
  -1  -2 -12   94.19   18.40
   1   2  13  218.78   23.40
   1   2  13  211.78    7.50
   1   2  13  211.78    7.30
  -1   2 -13  191.38   22.10
  -1   2 -13  244.08   22.30
  -1   2 -13  226.78   11.10
  -1   2 -13  237.18   15.50
  -1   2 -13  212.28   23.30
   1  -2  13  210.38   10.60
  -1  -2 -13  233.88   14.80
  -1  -2 -13  219.48   26.70
   1  -2  13  231.28   23.60
   1   2  14   88.29    4.40
  -1   2 -14   85.89    7.20
   1   2  14   85.69   18.40
  -1   2 -14   76.69   17.30
  -1   2 -14   73.79   17.10
  -1   2 -14   77.99   11.10
  -1   2 -14   59.39   15.50
   1   2  14   89.09    4.50
   1  -2  14   96.99    7.80
  -1  -2 -14   37.40   16.00
  -1  -2 -14   83.09   11.40
   1  -2  14   66.49   16.50
  -1  -2 -14   66.89   18.70
  -1   2 -15   71.29   17.70
  -1   2 -15   48.30   16.00
  -1   2 -15   54.19    6.20
  -1   2 -15   67.39   10.70
   1   2  15   65.29   19.10
   1  -2  15   57.69    6.60
  -1  -2 -15   42.30   19.20
  -1  -2 -15   50.59    9.10
  -1   2 -16   31.10    8.00
   1   2  16   13.80   19.50
  -1   2 -16   43.40    6.40
  -1   2 -16   25.90   16.40
  -1   2 -16   29.30   17.20
   1  -2  16   41.10    6.30
  -1  -2 -16   20.60   17.80
  -1  -2 -16   31.90    8.60
  -1   2 -17   13.00    4.10
  -1   2 -17    7.20   20.80
  -1   2 -17   37.10   19.50
  -1   2 -17   11.10    6.60
  -1  -2 -17   12.10    6.60
   1  -2  17    0.10    4.40
   1  -2  17   -0.20    3.50
  -1  -2 -17   -5.30   20.10
  -1   2 -18   -0.20   20.40
  -1  -2 -18    5.70    7.90
   1  -2  18   -5.80    3.80
  -1  -2 -18    3.00   22.30
  -1   2 -19   10.50   24.40
  -1  -2 -19    5.10   28.50
  -1  -3  20   -0.40    7.20
   1   3 -19  -15.90   20.20
  -1  -3  19   -2.30    4.80
   1  -3 -19   40.70   27.10
   1   3 -18   29.70   18.90
   1   3 -18   63.09   11.20
   1  -3 -18   89.49   13.30
  -1  -3  18   68.49    9.70
   1  -3 -18  126.49   30.30
   1   3 -17   -1.70   15.70
  -1   3  17   -0.50    1.90
  -1   3  17    1.10    1.40
   1   3 -17    0.40   14.50
   1   3 -17   10.10    4.20
   1  -3 -17   -0.10   16.80
   1  -3 -17   -5.10    5.20
  -1  -3  17    9.10    5.10
   1   3 -16   24.10    5.50
   1   3 -16   32.30   13.90
   1   3 -16   30.00    9.00
  -1   3  16   21.40   19.10
   1   3 -16   22.50   12.40
   1  -3 -16   20.10    6.90
  -1  -3  16   27.50    6.70
   1  -3 -16   25.90   17.30
   1   3 -15   16.80   11.20
   1   3 -15   21.10    6.30
  -1   3  15   27.80   16.70
  -1   3  15    7.50   15.50
  -1   3  15   19.80    2.90
   1   3 -15   12.60   10.70
   1   3 -15   16.20    4.40
   1  -3 -15   14.60    5.90
  -1  -3  15   12.70    4.20
   1   3 -14  547.85   28.70
  -1   3  14  506.05   13.70
  -1   3  14  492.25   34.00
  -1   3  14  463.05   36.30
   1   3 -14  473.35   18.80
   1   3 -14  548.85   31.70
  -1   3  14  483.35   13.90
   1   3 -14  524.25   23.90
   1   3 -14  441.36   32.60
   1  -3 -14  504.55   37.50
   1  -3 -14  503.05   23.20
  -1  -3  14  485.05   18.80
  -1   3  13   33.30   12.30
  -1   3  13   30.50   13.10
  -1   3  13   42.10    3.60
  -1   3  13   44.00    7.00
  -1   3  13   46.90    3.40
   1   3 -13   42.50    5.40
   1   3 -13   26.40    9.40
   1   3 -13   29.10    6.50
   1   3 -13   45.80   13.00
   1   3 -13   45.60   11.30
   1  -3 -13   48.70   11.90
   1  -3 -13   37.30   13.80
  -1  -3  13   48.20    6.30
  -1   3  12 1144.79   46.90
   1   3 -12 1102.69   47.50
  -1   3  12 1184.48   26.20
   1   3 -12 1173.68   43.40
   1   3 -12 1173.18   36.50
  -1   3  12 1172.98   35.50
  -1   3  12 1134.29   51.69
   1   3 -12 1167.08   31.90
   1   3 -12 1069.19   43.90
  -1   3  12 1135.69   25.60
   1  -3 -12 1158.58   35.60
  -1  -3  12 1177.58   31.50
  -1  -3  12 1097.69   44.90
  -1  -3  12 1147.49   35.80
   1  -3 -12 1206.68   54.39
   1   3 -11   23.80    6.80
  -1   3  11   31.70    2.80
   1   3 -11   34.90   10.10
   1   3 -11   30.40    8.10
  -1   3  11   30.90    5.60
  -1   3  11   24.80    8.30
   1   3 -11   26.10    5.20
  -1   3  11   35.10    3.00
  -1   3  11   34.50   12.10
   1   3 -11   28.10    4.60
  -1  -3  11   32.80    5.10
  -1  -3  11   25.50    5.50
  -1  -3  11   50.09   11.30
   1  -3 -11   30.60   12.00
   1  -3 -11   39.60    6.60
   1   3 -10  349.57   19.60
  -1   3  10  349.87   26.00
  -1   3  10  344.57   22.60
   1   3 -10  325.87   15.60
  -1   3  10  326.97   10.00
   1   3 -10  310.37   17.00
   1   3 -10  347.67   13.80
  -1   3  10  349.07   15.50
  -1   3  10  347.27    9.90
   1  -3 -10  360.86   26.60
  -1  -3  10  331.07   15.50
  -1  -3  10  354.06   13.70
   1  -3 -10  354.26   15.60
   1   3  -9   15.90    3.30
   1   3  -9   20.40    4.40
   1   3  -9   11.80    5.00
  -1   3   9    9.40    7.40
  -1   3   9   11.60    5.40
  -1   3   9   14.20    1.70
  -1   3   9   14.70    2.10
   1   3  -9   11.30    4.20
   1   3  -9    7.40    4.80
  -1   3   9   15.50    3.50
   1  -3  -9   14.70    8.10
  -1  -3   9   15.40    6.60
  -1  -3   9   11.10    3.40
  -1  -3   9   10.70    2.60
   1  -3  -9   13.00    3.10
   1   3  -8   -0.50    2.50
  -1   3   8   -0.30    4.80
  -1   3   8    0.10    0.60
  -1   3   8    1.50    0.90
  -1   3   8    4.80    4.20
   1   3  -8    2.20    3.10
   1   3  -8    1.10    3.00
   1   3  -8    6.10    2.80
  -1   3   8    5.50    2.40
  -1  -3   8   -4.60    3.80
  -1  -3   8    2.40    1.90
   1  -3  -8    1.10    5.10
   1  -3  -8    1.30    1.40
  -1  -3   8    2.50    2.20
   1   3  -7    0.20    1.00
  -1   3   7   -0.10    0.50
   1   3  -7   -0.40    2.10
   1   3  -7    0.40    2.40
  -1   3   7   -0.20    0.50
   1   3  -7   -0.10    4.60
  -1   3   7    0.10    3.60
   1   3  -7    0.70    1.30
   1  -3  -7   -1.40    1.00
   1  -3  -7   -2.00    4.20
  -1  -3   7    2.30    1.50
  -1  -3   7    3.40    3.20
  -1  -3   7    0.60    1.60
   1   3  -6 1326.27   33.00
   1   3  -6 1318.97   32.00
   1   3  -6 1293.07   38.90
  -1   3   6 1302.77   31.30
   1   3  -6 1295.87   30.90
  -1   3   6 1324.47   27.20
  -1   3   6 1290.17   26.70
   1   3  -6 1340.47   31.60
  -1   3   6 1324.27   45.40
   1  -3  -6 1336.17   31.40
  -1  -3   6 1338.67   37.90
  -1  -3   6 1338.67   32.10
  -1  -3   6 1326.37   31.00
   1  -3  -6 1368.26   46.30
  -1   3   5    2.10    3.50
   1   3  -5    2.30    1.80
  -1   3   5    7.40    1.10
  -1   3   5    8.10    1.80
   1   3  -5    5.80    2.00
   1   3  -5    5.80    1.50
   1   3  -5    5.90    2.00
  -1  -3   5    7.00    1.70
   1  -3  -5    5.90    1.10
  -1  -3   5    5.50    3.00
   1  -3  -5    5.70    1.60
  -1  -3   5    6.70    1.80
   1  -3  -5    2.30    3.60
   1   3  -4 4693.33   86.59
   1   3  -4 4667.73   95.29
   1   3  -4 4654.63   85.99
   1   3  -4 4478.55   88.79
  -1   3   4 4570.44   85.49
  -1   3   4 4677.93  104.29
  -1   3   4 4572.04   88.09
   1  -3  -4 4486.55   85.59
   1  -3  -4 4638.74   88.09
  -1  -3   4 4601.44   88.99
   1  -3  -4 4616.04  103.79
  -1  -3   4 4514.75   93.89
   1   3  -3   47.10    5.30
  -1   3   3   56.79    2.70
  -1   3   3   43.80    4.50
  -1   3   3   43.90    6.30
   1   3  -3   57.69    3.70
   1   3  -3   59.89    3.50
  -1   3   3   55.29    3.10
  -1  -3   3   51.59    4.60
   1  -3  -3   57.49    2.70
  -1  -3   3   50.69    3.30
  -1  -3   3   56.19    3.60
   1  -3  -3   54.09    3.00
   1  -3  -3   46.90    6.30
  -1   3   2 2100.49   44.10
   1   3  -2 2011.50   40.50
  -1   3   2 1963.50   39.20
   1   3  -2 1914.41   40.70
   1   3  -2 2048.20   43.10
   1   3  -2 2007.10   39.40
  -1   3   2 2023.90   38.60
  -1   3   2 2039.60   50.69
   1  -3  -2 2092.19   51.19
   1  -3  -2 1926.41   38.40
  -1  -3   2 1997.10   39.40
   1  -3  -2 2021.10   39.30
   1  -3  -2 2065.79   44.60
  -1  -3   2 2017.90   42.70
  -1  -3   2 2007.90   40.40
  -1  -3   2 1954.00   40.80
   1   3  -1    9.80    1.60
  -1   3   1    5.60    1.60
  -1   3   1    8.90    0.70
   1   3  -1    8.20    2.10
   1   3  -1   10.00    1.00
   1   3  -1    7.40    1.70
  -1   3   1    7.10    2.70
  -1   3   1   10.30    1.50
   1  -3  -1    7.30    1.30
  -1  -3   1    9.50    1.90
  -1  -3   1    9.10    1.10
   1  -3  -1    5.60    1.80
   1  -3  -1    8.70    3.00
   1  -3  -1    9.30    0.80
  -1  -3   1    8.00    1.40
  -1  -3   1    6.40    1.90
  -1   3   0   45.20    3.90
  -1   3   0   39.70    2.60
   1   3   0   38.50    2.80
  -1   3   0   39.60    4.60
   1   3   0   44.20    4.80
  -1   3   0   41.10    1.70
   1   3   0   42.70    2.50
  -1  -3   0   47.20    4.90
  -1  -3   0   43.30    2.90
   1  -3   0   44.20    1.80
   1  -3   0   46.80    4.80
  -1  -3   0   42.00    1.70
   1  -3   0   43.50    2.80
   1  -3   0   40.80    3.70
  -1  -3   0   44.70    1.80
  -1  -3   0   44.30    2.50
   1   3   1    0.70    0.80
   1   3   1    2.10    0.60
  -1   3  -1    1.40    1.50
   1   3   1    1.30    2.10
  -1   3  -1    1.20    1.00
   1   3   1    2.40    0.60
  -1   3  -1    1.30    0.60
  -1   3  -1    0.70    0.80
  -1  -3  -1    2.30    1.90
   1  -3   1    3.00    1.10
  -1  -3  -1    2.10    0.60
   1  -3   1    1.90    1.40
   1  -3   1    2.00    1.50
   1  -3   1    2.40    0.80
  -1  -3  -1    2.20    0.70
  -1   3  -2 2893.41   55.89
   1   3   2 2932.61   53.49
   1   3   2 2864.21   67.49
   1   3   2 2842.62   55.09
  -1   3  -2 2879.81   61.29
  -1   3  -2 2858.81   59.89
  -1   3  -2 2903.11   56.99
   1  -3   2 2842.72   60.89
  -1  -3  -2 2850.41   68.29
  -1  -3  -2 2878.21   53.59
   1  -3   2 2867.71   56.69
  -1  -3  -2 2814.82   55.09
   1  -3   2 2869.91   55.69
   1  -3   2 2881.41   60.39
   1   3   3   21.20    2.20
   1   3   3   19.70    0.90
  -1   3  -3   16.00    2.30
  -1   3  -3   25.10    4.60
   1   3   3   14.50    4.50
  -1   3  -3   20.20    2.40
  -1   3  -3   11.00    2.50
  -1  -3  -3   19.90    1.00
   1  -3   3   21.30    4.00
   1  -3   3   15.50    2.20
   1  -3   3   14.70    3.10
  -1  -3  -3   23.70    5.70
   1  -3   3   22.30    2.40
  -1  -3  -3   15.50    2.10
  -1   3  -4 2774.22   57.89
   1   3   4 2836.72   72.19
  -1   3  -4 2915.31   61.69
  -1   3  -4 2756.62   64.49
  -1   3  -4 2784.52   57.29
   1   3   4 2798.42   56.99
  -1  -3  -4 2822.62   57.29
   1  -3   4 2863.11   62.09
   1  -3   4 2796.12   57.09
  -1  -3  -4 2890.91   73.59
   1  -3   4 2770.92   57.69
   1  -3   4 2940.51   63.99
   1   3   5   58.69    9.00
  -1   3  -5   76.19    5.40
  -1   3  -5   72.69    4.80
  -1   3  -5   65.69    7.50
   1   3   5   70.09    4.80
   1   3   5   60.49    7.00
   1  -3   5   56.49    6.70
  -1  -3  -5   50.49    9.50
   1  -3   5   67.09    4.50
  -1  -3  -5   65.89    4.80
   1  -3   5   64.49    4.80
  -1   3  -6 3547.65   84.99
  -1   3  -6 3710.73   80.69
  -1   3  -6 3745.13   83.19
  -1   3  -6 3697.63   74.09
   1   3   6 3552.84   83.59
   1   3   6 3625.24   74.99
   1  -3   6 3570.54   73.39
  -1  -3  -6 3713.03  104.69
   1  -3   6 3790.72   79.79
  -1  -3  -6 3712.93   75.49
   1  -3   6 3640.34   83.19
  -1   3  -7   26.70    3.40
  -1   3  -7   27.90    7.40
   1   3   7   19.60    3.60
  -1   3  -7   21.30    5.80
  -1   3  -7   13.70    4.70
  -1   3  -7   30.70    4.70
   1   3   7   25.20    6.00
   1   3   7   29.60    8.20
  -1  -3  -7   22.50    8.20
   1  -3   7   27.40    3.20
  -1  -3  -7   21.30    3.90
   1  -3   7   25.70    4.20
   1  -3   7   17.40    5.20
   1   3   8   43.00    1.70
   1   3   8   45.10    1.80
  -1   3  -8   46.70    7.90
  -1   3  -8   57.29    7.10
  -1   3  -8   35.80    7.90
   1   3   8   49.80    9.50
   1   3   8   53.89   12.30
  -1   3  -8   44.50    5.10
  -1   3  -8   59.29    9.90
   1   3   8   51.69    6.50
  -1  -3  -8   43.80    5.90
   1  -3   8   35.20    7.20
   1  -3   8   51.89    5.70
  -1  -3  -8   48.50   11.40
   1   3   9    1.00    0.50
   1   3   9    1.50    4.20
  -1   3  -9    0.20    1.20
  -1   3  -9    3.10    2.60
  -1   3  -9    2.50    4.50
  -1   3  -9   -0.70    4.10
  -1   3  -9   -0.70    4.10
   1   3   9    3.70    2.70
   1   3   9   -2.50    6.30
   1   3   9    1.30    0.60
  -1  -3  -9    3.90    6.10
   1  -3   9    1.20    2.30
   1  -3   9   -2.20    4.80
   1  -3   9   -0.20    1.40
  -1  -3  -9   -1.30    1.60
  -1   3 -10  804.52   36.80
  -1   3 -10  832.62   35.60
  -1   3 -10  798.72   23.40
  -1   3 -10  770.52   27.10
   1   3  10  817.32   16.50
   1   3  10  782.02   40.60
   1   3  10  794.62   35.00
   1   3  10  791.92   26.50
   1   3  10  796.22   16.60
  -1  -3 -10  851.41   27.60
   1  -3  10  829.82   34.90
   1  -3  10  848.22   27.50
   1  -3  10  828.22   23.50
  -1  -3 -10  764.92   41.40
   1   3  11    6.90    1.10
  -1   3 -11    8.80    3.70
  -1   3 -11   10.40    7.40
  -1   3 -11    7.70    7.40
   1   3  11   18.90   10.40
  -1   3 -11    1.10    6.10
   1   3  11    3.20    7.50
   1   3  11    7.70    1.10
  -1   3 -11   11.10    3.20
  -1  -3 -11    9.40    3.90
  -1  -3 -11    7.50    9.90
   1  -3  11    4.50    3.40
   1  -3  11    7.90    3.00
   1  -3  11    8.50    9.40
   1   3  12  354.46    8.20
  -1   3 -12  330.17   26.00
   1   3  12  357.56    8.30
   1   3  12  393.36   37.30
   1   3  12  354.76   17.70
  -1   3 -12  350.26   14.70
  -1   3 -12  368.06   26.40
  -1   3 -12  374.46   23.70
   1   3  12  346.07   25.80
   1  -3  12  342.57   14.20
  -1  -3 -12  352.46   18.10
   1  -3  12  345.57   25.60
  -1  -3 -12  351.36   31.10
   1  -3  12  357.76   18.40
  -1   3 -13   86.19    7.30
   1   3  13   89.29    2.90
   1   3  13   78.09   18.90
   1   3  13   90.39    2.80
  -1   3 -13   84.79   11.30
  -1   3 -13   84.89   18.20
  -1   3 -13   65.09   15.40
  -1   3 -13   59.79   13.30
   1   3  13   97.79   17.00
   1  -3  13  112.79   18.50
  -1  -3 -13   86.99   19.90
  -1  -3 -13   83.19   11.00
   1  -3  13   89.79    7.50
   1   3  14  579.64   37.00
  -1   3 -14  556.94   38.10
  -1   3 -14  542.25   35.30
  -1   3 -14  591.84   26.30
  -1   3 -14  536.85   20.10
  -1   3 -14  616.94   34.00
   1  -3  14  592.04   20.50
  -1  -3 -14  557.44   25.20
  -1   3 -15   31.70   15.10
  -1   3 -15   33.30   14.90
  -1   3 -15   51.19   10.30
  -1   3 -15   12.50   13.40
  -1   3 -15   41.40    6.40
   1   3  15   43.60   17.80
  -1  -3 -15   48.40    9.30
  -1  -3 -15   46.40   19.50
   1  -3  15   39.00    6.30
  -1   3 -16  120.29    9.40
  -1   3 -16  127.79   23.00
  -1   3 -16  114.59   21.00
  -1   3 -16  101.49   13.60
  -1  -3 -16  113.19   14.80
  -1  -3 -16  135.49   29.50
   1  -3  16  124.49    9.80
  -1   3 -17    9.10    6.80
  -1   3 -17  -12.00   17.00
  -1   3 -17    9.80   18.80
  -1   3 -17    1.30    3.70
   1  -3  17    7.40    5.40
  -1  -3 -17  -10.40   20.60
  -1  -3 -17   -0.20    6.30
  -1   3 -18   24.30   21.00
  -1   3 -18   13.90    5.10
  -1  -3 -18   17.80   25.60
   1  -3  18    3.30    4.20
  -1  -3 -18   19.00    9.60
  -1   3 -19   31.80   25.80
  -1  -3 -19   11.90   49.70
   1  -4 -20   32.20   35.10
   1   4 -19    7.20   19.30
   1  -4 -19  131.99   33.60
   1   4 -18  -23.10   15.30
   1   4 -18   16.40    5.80
   1   4 -18   18.20    8.30
   1  -4 -18    9.70    7.30
   1  -4 -18   34.60   26.30
   1   4 -17   15.50    5.20
   1   4 -17    0.50   14.10
   1   4 -17   -1.90   13.10
   1   4 -17    4.10    6.50
   1  -4 -17   15.30    7.20
   1  -4 -17    3.20   18.90
   1   4 -16    6.00    3.60
  -1   4  16   -3.10   18.90
   1   4 -16    1.30    5.40
   1   4 -16   -2.00   11.50
   1   4 -16   -3.80   10.80
   1  -4 -16   -0.80    4.70
   1  -4 -16   10.50   15.60
  -1  -4  16    1.90    4.30
   1   4 -15  152.38   23.10
   1   4 -15  139.29   13.20
   1   4 -15  142.29   19.20
   1   4 -15  141.69   10.60
   1   4 -15  144.49   17.70
   1  -4 -15  176.48   29.40
   1  -4 -15  153.28   13.40
  -1  -4  15  135.29   10.70
  -1   4  14   82.89    3.90
  -1   4  14   66.49   14.90
  -1   4  14   75.99   19.00
  -1   4  14   87.79    4.30
   1   4 -14   77.29    7.80
   1   4 -14   47.10   10.70
   1   4 -14   66.49   13.30
   1   4 -14   85.59   11.40
  -1  -4  14   89.39    8.50
   1  -4 -14   67.99   18.00
   1  -4 -14   88.19   11.10
   1   4 -13  728.23   32.10
   1   4 -13  765.02   28.90
  -1   4  13  768.32   17.50
  -1   4  13  742.63   44.20
  -1   4  13  716.13   27.20
  -1   4  13  725.03   16.90
  -1   4  13  689.93   38.40
   1   4 -13  765.52   40.50
   1   4 -13  778.12   33.90
   1   4 -13  720.33   24.50
   1  -4 -13  790.52   46.40
  -1  -4  13  709.83   24.10
   1  -4 -13  733.33   31.60
  -1   4  12   60.59   16.10
  -1   4  12   79.49   15.90
  -1   4  12   73.69    9.00
   1   4 -12   65.59    8.80
  -1   4  12   67.09    3.60
  -1   4  12   64.49    3.80
   1   4 -12   58.49   10.80
   1   4 -12   52.59   11.20
   1   4 -12   61.19    6.30
   1   4 -12   47.00    8.90
   1  -4 -12   79.19    8.10
  -1  -4  12   55.69    7.70
  -1  -4  12   66.09    6.70
   1  -4 -12   54.89   14.90
   1   4 -11  201.48   19.40
  -1   4  11  196.58   12.20
  -1   4  11  249.88   21.30
  -1   4  11  214.58    7.20
   1   4 -11  228.88   16.20
   1   4 -11  233.38   14.80
   1   4 -11  207.78   13.00
  -1   4  11  208.48    6.80
   1   4 -11  223.48   11.60
  -1   4  11  244.58   24.60
  -1  -4  11  210.98   18.90
  -1  -4  11  202.48   10.90
   1  -4 -11  206.18   12.30
   1  -4 -11  209.68   23.20
   1   4 -10   27.30    6.50
  -1   4  10   37.50   12.50
   1   4 -10   26.80    5.00
   1   4 -10   14.60    5.20
  -1   4  10   37.30    6.00
   1   4 -10   34.60    5.20
   1   4 -10   25.90    7.90
  -1   4  10   34.10    2.50
  -1   4  10   32.90    2.50
  -1   4  10   44.90   10.80
  -1  -4  10   35.70    9.50
  -1  -4  10   27.30    4.40
   1  -4 -10   37.40   11.80
   1  -4 -10   31.40    5.50
  -1  -4  10   30.00    5.40
   1   4  -9   36.50    4.40
  -1   4   9   37.70   11.70
   1   4  -9   38.10    7.00
  -1   4   9   33.60    2.30
   1   4  -9   35.50    6.00
  -1   4   9   30.10    8.60
   1   4  -9   31.10    8.50
  -1   4   9   34.20    5.30
  -1   4   9   41.90    2.70
   1   4  -9   38.50    6.10
  -1  -4   9   36.20    5.20
   1  -4  -9   37.90   11.10
   1  -4  -9   30.60    4.80
  -1  -4   9   26.10    4.30
   1   4  -8    4.00    1.90
   1   4  -8    0.70    2.50
  -1   4   8    4.30    1.10
   1   4  -8    2.60    3.00
   1   4  -8    1.20    4.00
   1   4  -8    1.50    2.00
  -1   4   8    4.60    2.10
  -1   4   8    2.10    4.70
  -1   4   8    2.50    0.80
  -1   4   8    1.90    6.10
  -1  -4   8    1.80    4.50
   1  -4  -8   -1.70    5.30
  -1  -4   8    2.60    1.70
  -1  -4   8    2.70    2.10
   1  -4  -8    2.70    1.80
  -1   4   7   59.49    6.00
   1   4  -7   59.59    5.80
   1   4  -7   54.29    5.10
  -1   4   7   55.49    2.90
   1   4  -7   45.70    8.10
  -1   4   7   60.69   12.10
   1   4  -7   55.19    5.10
  -1   4   7   55.29    3.10
   1   4  -7   51.09    4.80
  -1  -4   7   69.09   10.40
  -1  -4   7   58.99    5.00
   1  -4  -7   61.29   12.10
  -1  -4   7   52.39    5.10
   1  -4  -7   63.49    5.20
  -1   4   6   49.20    2.70
  -1   4   6   45.30    4.20
   1   4  -6   57.19    7.40
   1   4  -6   32.90    4.00
   1   4  -6   40.90    4.00
   1   4  -6   50.09    4.50
   1  -4  -6   48.10    2.80
  -1  -4   6   52.99    4.50
   1  -4  -6   54.29    4.40
  -1  -4   6   48.90    4.50
   1  -4  -6   41.50   10.40
  -1   4   5 2366.46   67.19
  -1   4   5 2333.67   45.80
   1   4  -5 2354.66   47.50
   1   4  -5 2387.86   57.79
   1   4  -5 2408.86   50.29
   1   4  -5 2268.07   46.70
   1   4  -5 2294.87   50.29
  -1   4   5 2373.56   49.10
  -1  -4   5 2428.06   50.39
  -1  -4   5 2454.75   56.59
  -1  -4   5 2305.87   50.09
   1  -4  -5 2423.96   67.29
   1  -4  -5 2407.16   49.20
   1  -4  -5 2344.17   45.90
   1   4  -4   86.19    5.20
  -1   4   4   69.99    9.50
  -1   4   4   90.09    3.80
   1   4  -4   86.69    4.90
   1   4  -4   81.29    7.00
  -1   4   4   80.29    4.40
   1  -4  -4   87.99    3.80
  -1  -4   4   87.59    5.30
  -1  -4   4   90.89    5.00
  -1  -4   4   81.59    6.70
   1  -4  -4   85.29    4.40
   1  -4  -4   83.69    9.70
  -1   4   3 6138.29  114.89
  -1   4   3 6131.49  121.99
  -1   4   3 6262.77  133.59
   1   4  -3 6098.59  116.39
   1   4  -3 6186.38  122.09
   1  -4  -3 6281.57  133.19
  -1  -4   3 6363.36  121.49
  -1  -4   3 5974.90  115.69
   1   4  -2   -0.30    0.60
   1   4  -2   -0.20    1.10
  -1   4   2   -0.60    2.20
  -1   4   2    1.80    1.30
   1   4  -2    0.80    0.60
   1   4  -2    1.70    1.50
  -1   4   2    0.90    0.70
  -1   4   2    0.80    0.50
  -1  -4   2    0.80    0.60
   1  -4  -2    0.80    0.70
   1  -4  -2    1.10    1.40
   1  -4  -2    1.40    2.40
   1  -4  -2    0.80    0.50
  -1  -4   2    0.70    1.10
  -1  -4   2    1.10    0.80
  -1  -4   2    1.20    1.20
   1   4  -1  708.43   14.80
  -1   4   1  720.33   25.20
   1   4  -1  697.03   17.20
  -1   4   1  706.33   20.00
  -1   4   1  712.53   16.90
   1   4  -1  730.13   20.80
  -1   4   1  725.93   13.90
   1   4  -1  731.93   21.80
  -1  -4   1  672.53   14.70
   1  -4  -1  693.53   13.90
   1  -4  -1  709.33   20.30
  -1  -4   1  707.43   17.30
  -1  -4   1  734.83   18.90
   1  -4  -1  695.73   16.90
   1  -4  -1  708.73   25.00
  -1  -4   1  719.63   21.50
   1   4   0    0.40    1.90
  -1   4   0    1.10    0.40
  -1   4   0    3.00    2.50
   1   4   0    1.30    0.70
  -1   4   0    0.40    1.00
  -1   4   0    1.20    0.80
   1  -4   0   -0.30    1.60
   1  -4   0    1.20    0.80
  -1  -4   0    0.80    0.60
  -1  -4   0    0.70    1.80
  -1  -4   0    1.70    0.40
   1  -4   0    1.80    0.50
  -1  -4   0    0.70    0.30
  -1  -4   0    0.60    1.00
   1  -4   0    2.10    1.90
   1   4   1 1864.01   35.90
   1   4   1 1882.41   40.00
   1   4   1 1885.01   49.00
  -1   4  -1 1833.62   43.10
  -1   4  -1 1889.01   36.60
  -1   4  -1 1922.81   45.60
  -1   4  -1 1864.61   39.50
   1   4   1 1808.42   37.40
  -1  -4  -1 1819.12   37.40
   1  -4   1 1932.01   45.70
   1  -4   1 1909.01   36.70
  -1  -4  -1 1886.91   36.00
   1  -4   1 1878.21   39.30
   1  -4   1 1885.61   42.90
  -1  -4  -1 1914.61   49.40
  -1  -4  -1 1926.41   40.60
   1   4   2    5.60    1.90
   1   4   2    6.20    3.20
   1   4   2    9.30    1.30
   1   4   2    7.50    1.30
  -1   4  -2    2.70    2.00
  -1   4  -2    6.60    2.50
  -1   4  -2    7.40    1.80
  -1   4  -2   10.20    1.60
   1  -4   2    3.90    2.20
   1  -4   2    2.90    1.60
   1  -4   2    6.50    1.60
  -1  -4  -2    8.60    1.30
  -1  -4  -2    5.00    3.10
   1  -4   2    5.70    1.20
  -1  -4  -2    7.40    1.20
  -1   4  -3  381.46   11.40
   1   4   3  364.46   10.50
   1   4   3  372.36    8.70
  -1   4  -3  364.66   11.90
  -1   4  -3  402.06   20.40
  -1   4  -3  382.36   14.10
  -1  -4  -3  381.46   10.70
   1  -4   3  385.96   14.40
   1  -4   3  352.76   14.70
   1  -4   3  362.06   11.90
   1  -4   3  382.46   11.30
  -1  -4  -3  387.96   20.80
  -1  -4  -3  356.96    8.70
   1   4   4   -0.60    3.40
  -1   4  -4    4.20    1.40
  -1   4  -4    1.00    2.10
  -1   4  -4    2.60    1.30
   1   4   4    3.80    0.60
   1   4   4    2.70    1.10
  -1   4  -4    0.50    2.20
   1  -4   4    2.40    1.80
   1  -4   4    3.70    2.40
  -1  -4  -4    3.10    4.20
  -1  -4  -4    2.30    0.50
   1  -4   4    2.20    1.30
   1  -4   4    5.30    1.60
  -1  -4  -4    2.30    1.10
   1   4   5 6688.73  149.69
  -1   4  -5 6763.52  132.39
   1   4   5 6424.36  127.29
  -1   4  -5 6522.35  128.59
  -1   4  -5 6708.23  138.89
   1  -4   5 6466.75  128.29
  -1  -4  -5 6710.33  127.79
   1  -4   5 6836.22  134.09
   1  -4   5 6583.74  136.19
  -1  -4  -5 6845.82  151.38
   1   4   6   55.89   11.60
   1   4   6   65.49    5.10
  -1   4  -6   66.89   10.00
   1   4   6   59.79    9.10
  -1   4  -6   60.79    4.90
  -1   4  -6   55.39    6.10
   1  -4   6   56.09    8.30
   1  -4   6   64.99    4.90
  -1  -4  -6   56.19   11.70
  -1  -4  -6   54.69    4.70
   1  -4   6   64.19    5.30
  -1   4  -7  781.92   26.80
   1   4   7  842.82   24.00
   1   4   7  886.21   39.60
  -1   4  -7  850.01   32.80
  -1   4  -7  854.41   25.10
   1   4   7  852.11   31.70
  -1   4  -7  894.91   30.10
  -1   4  -7  823.62   23.30
   1  -4   7  826.92   23.00
  -1  -4  -7  854.31   40.00
  -1  -4  -7  822.92   24.00
   1  -4   7  860.91   24.80
   1  -4   7  819.42   30.60
  -1   4  -8    8.00    4.20
  -1   4  -8   15.60    6.40
   1   4   8   14.60    8.00
  -1   4  -8   17.50    3.60
   1   4   8   18.90    6.60
  -1   4  -8   17.70    3.70
   1   4   8   20.20    4.10
  -1   4  -8   18.60    5.60
  -1  -4  -8   17.60    8.90
   1  -4   8   17.90    3.40
   1  -4   8   23.70    4.50
  -1  -4  -8    7.50    2.40
   1  -4   8   19.30    6.70
   1   4   9   39.00    5.80
  -1   4  -9   43.80   10.70
   1   4   9   40.90    9.90
  -1   4  -9   39.40    6.50
   1   4   9   37.10   11.90
  -1   4  -9   33.80    7.30
  -1   4  -9   40.00    8.40
  -1   4  -9   31.00    4.60
  -1  -4  -9   35.70   11.10
   1  -4   9   32.40    5.40
   1  -4   9   33.80    4.30
   1  -4   9   43.80   12.50
  -1  -4  -9   32.60    5.50
  -1   4 -10   11.30    3.90
  -1   4 -10   11.00    5.70
  -1   4 -10    9.40    3.00
   1   4  10   10.20    8.70
  -1   4 -10   13.60    6.70
   1   4  10    9.50    3.80
  -1   4 -10    6.00    6.00
   1   4  10    6.10    6.00
  -1  -4 -10   14.30   10.60
   1  -4  10    6.60    2.40
  -1  -4 -10   10.00    3.30
   1  -4  10    3.30    6.40
   1  -4  10   12.40    3.90
   1   4  11  185.48   23.20
  -1   4 -11  151.98    9.60
   1   4  11  157.98   14.00
  -1   4 -11  144.99   17.60
  -1   4 -11  173.38   12.10
  -1   4 -11  175.48   15.70
   1   4  11  143.49   17.40
  -1  -4 -11  177.78   11.70
  -1  -4 -11  182.88   22.90
   1  -4  11  168.58   11.60
   1  -4  11  170.48    9.90
  -1   4 -12   10.00    7.30
   1   4  12   15.70    8.80
  -1   4 -12   21.40    4.60
  -1   4 -12   47.60   16.50
  -1   4 -12   20.50    9.40
   1   4  12   21.50   12.60
   1   4  12   14.30    4.60
  -1   4 -12   14.00    7.00
  -1  -4 -12   17.70    5.70
  -1  -4 -12    8.00   11.00
   1  -4  12   18.50    4.30
   1  -4  12    7.80    9.80
   1  -4  12   16.00    7.00
  -1   4 -13 1209.18   49.40
  -1   4 -13 1158.08   38.90
  -1   4 -13 1146.09   33.40
   1   4  13 1234.98   51.19
  -1   4 -13 1107.09   51.89
   1   4  13 1208.68   59.09
  -1   4 -13 1183.88   43.70
  -1  -4 -13 1159.58   38.10
  -1  -4 -13 1185.28   60.59
   1  -4  13 1207.18   33.20
  -1   4 -14   79.29   15.70
  -1   4 -14   83.19   10.80
  -1   4 -14   46.70   12.90
   1   4  14   73.39   16.90
  -1   4 -14   78.99   16.80
  -1   4 -14   91.99    8.20
  -1  -4 -14   78.89   22.20
  -1  -4 -14   82.09   11.30
   1  -4  14   83.59    8.30
  -1   4 -15  364.76   30.80
  -1   4 -15  357.66   37.50
  -1   4 -15  394.36   22.40
  -1   4 -15  374.16   17.30
  -1   4 -15  377.06   28.40
   1  -4  15  386.56   19.80
  -1  -4 -15  391.56   21.60
  -1  -4 -15  429.76   41.80
  -1   4 -16   29.90   15.40
  -1   4 -16   22.00   15.90
  -1   4 -16   21.80   16.40
  -1   4 -16   13.00    6.80
  -1   4 -16   16.50    5.30
   1   4  16   12.00   20.20
  -1  -4 -16   15.80   18.30
   1  -4  16   15.10    5.30
  -1  -4 -16    6.60    5.70
  -1   4 -17    1.40    4.50
  -1   4 -17    1.00   21.70
  -1   4 -17    4.50    6.20
  -1   4 -17   15.50   18.10
  -1  -4 -17   -6.20   23.00
  -1  -4 -17    3.20    5.90
   1  -4  17    7.60    5.70
  -1   4 -18    0.20   19.50
  -1   4 -18    1.60    4.70
  -1  -4 -18   -3.10    8.10
  -1  -4 -18   -7.40   25.70
  -1   4 -19   73.39    9.70
  -1   4 -19   -1.30   26.70
  -1  -4 -19   47.20   32.90
   1   5 -19   63.79    9.40
   1  -5 -19   61.39   32.20
   1   5 -18   64.39    8.90
   1   5 -18   15.50   14.70
   1   5 -18   53.09   10.80
   1  -5 -18   73.29   12.00
   1  -5 -18   82.89   30.90
   1   5 -17    4.50   13.20
   1   5 -17    7.80   12.60
   1   5 -17    1.00    4.30
   1   5 -17    0.20    6.50
   1  -5 -17   -8.40   20.80
   1  -5 -17    2.40    5.50
   1   5 -16   19.00   13.10
  -1   5  16    9.30   20.10
   1   5 -16   -4.70   10.90
   1   5 -16    5.20    5.50
   1   5 -16    7.70    4.40
   1   5 -16    4.20   10.90
   1  -5 -16   18.20    6.70
   1  -5 -16   19.00   18.30
  -1   5  15   46.50   18.30
   1   5 -15   54.89    8.10
   1   5 -15   37.20   12.30
   1   5 -15   52.39    9.80
   1   5 -15   37.30   16.80
   1   5 -15   59.89   17.40
   1  -5 -15   55.19    9.20
  -1  -5  15   50.89    7.60
   1  -5 -15   56.29   21.10
   1   5 -14  203.18   16.30
  -1   5  14  163.58   24.40
   1   5 -14  160.28   23.00
   1   5 -14  172.08   11.80
   1   5 -14  175.78   14.20
   1   5 -14  198.68   17.80
   1  -5 -14  147.49   12.60
   1  -5 -14  185.08   27.40
  -1  -5  14  166.08   11.60
   1   5 -13  251.17   13.80
  -1   5  13  254.47    6.60
  -1   5  13  237.28   14.70
  -1   5  13  212.78   28.10
   1   5 -13  230.48   25.20
   1   5 -13  255.47   16.00
  -1   5  13  244.88    6.70
  -1   5  13  250.57   25.10
   1   5 -13  237.68   18.10
  -1  -5  13  255.47   13.90
   1  -5 -13  230.78   16.80
   1  -5 -13  186.78   26.50
   1   5 -12  244.18   14.80
  -1   5  12  220.78   27.90
  -1   5  12  242.98    6.90
   1   5 -12  251.27   13.40
  -1   5  12  277.57   24.20
   1   5 -12  245.58   17.10
   1   5 -12  240.88   22.60
   1   5 -12  238.38   15.00
  -1   5  12  242.78   14.20
  -1   5  12  252.07    7.20
  -1  -5  12  237.98   12.90
  -1  -5  12  234.58   14.60
   1  -5 -12  238.38   14.00
   1  -5 -12  268.77   27.90
   1   5 -11   58.49    8.10
  -1   5  11   52.79   15.10
  -1   5  11   83.19   15.20
   1   5 -11   74.09    8.00
   1   5 -11   66.79    9.50
  -1   5  11   88.59    3.80
   1   5 -11   71.39    7.00
   1   5 -11  127.99   18.90
  -1   5  11   83.39    8.20
  -1   5  11   77.89    3.50
   1  -5 -11   74.49    7.60
  -1  -5  11   69.79    6.70
  -1  -5  11   56.09    9.10
   1  -5 -11   48.10   13.60
  -1   5  10  456.25   11.30
   1   5 -10  472.65   27.10
  -1   5  10  457.75   11.60
  -1   5  10  454.95   32.70
   1   5 -10  480.45   19.50
   1   5 -10  440.76   17.50
  -1   5  10  453.45   18.20
  -1   5  10  476.85   27.40
   1   5 -10  478.55   20.10
   1   5 -10  481.25   18.50
   1  -5 -10  459.45   18.30
  -1  -5  10  474.45   17.70
  -1  -5  10  470.35   25.70
  -1  -5  10  466.85   19.00
   1  -5 -10  517.65   34.30
   1   5  -9   28.20    5.20
  -1   5   9   24.40    2.00
   1   5  -9   20.20    4.00
  -1   5   9   20.60    4.00
  -1   5   9   26.30    2.30
   1   5  -9   10.10    5.00
   1   5  -9   21.70    5.10
  -1   5   9   18.60   10.10
  -1   5   9   29.40    8.60
   1   5  -9   13.70    3.80
  -1  -5   9   22.90    4.80
   1  -5  -9   25.40   10.40
  -1  -5   9   26.10    4.30
   1  -5  -9   17.50    3.70
  -1  -5   9   20.40    6.90
   1   5  -8   15.80    4.00
   1   5  -8   14.30    3.40
  -1   5   8   11.40    7.10
   1   5  -8   15.40    3.40
  -1   5   8   20.00    3.70
  -1   5   8   13.30    1.70
   1   5  -8   12.20    5.40
   1   5  -8   11.00    2.90
  -1   5   8   13.20    1.60
  -1  -5   8    8.00    5.80
   1  -5  -8    9.00    6.30
   1  -5  -8   16.10    3.60
  -1  -5   8   22.00    4.20
  -1  -5   8   17.10    3.80
  -1   5   7    0.90    0.70
   1   5  -7    0.80    1.90
   1   5  -7   -2.00    3.00
   1   5  -7   -3.00    1.00
  -1   5   7    2.60    1.70
   1   5  -7    0.70    1.60
  -1   5   7   -1.80    5.40
   1   5  -7   -0.50    1.70
   1  -5  -7    2.10    1.60
   1  -5  -7    4.20    5.10
  -1  -5   7   -0.10    1.40
   1  -5  -7    0.20    0.80
  -1  -5   7    1.10    3.90
  -1  -5   7    0.30    1.50
   1   5  -6  190.48    7.80
   1   5  -6  191.68   13.20
   1   5  -6  193.38    9.40
  -1   5   6  190.38    8.50
   1   5  -6  192.88    7.50
  -1   5   6  194.38    6.30
  -1   5   6  205.38   17.90
   1   5  -6  199.08    9.30
  -1  -5   6  189.38   12.60
  -1  -5   6  184.78    9.10
  -1  -5   6  191.68    9.10
   1  -5  -6  185.18    6.30
   1  -5  -6  192.98    8.50
   1  -5  -6  191.58   17.40
   1   5  -5   90.39    6.00
  -1   5   5   87.19    4.00
  -1   5   5   88.49    5.10
   1   5  -5   81.59    5.30
   1   5  -5   82.19    8.00
  -1   5   5   64.09    7.00
  -1  -5   5   68.39    7.40
  -1  -5   5   85.59    5.90
   1  -5  -5   91.69    5.00
   1  -5  -5   87.39    4.00
  -1  -5   5   90.89    5.60
   1  -5  -5   70.79   13.50
  -1   5   4 1212.58   26.30
   1   5  -4 1132.59   28.80
   1   5  -4 1173.88   27.10
  -1   5   4 1216.08   42.80
  -1   5   4 1206.08   33.10
   1   5  -4 1210.68   27.50
  -1   5   4 1189.48   25.70
   1   5  -4 1176.28   33.60
  -1  -5   4 1194.28   27.50
   1  -5  -4 1290.57   43.70
   1  -5  -4 1168.98   26.00
  -1  -5   4 1221.88   26.90
   1  -5  -4 1148.89   25.40
  -1  -5   4 1226.58   33.00
  -1  -5   4 1187.08   29.00
   1   5  -3   68.39    3.80
  -1   5   3   70.59    9.40
  -1   5   3   78.29    4.00
   1   5  -3   71.19    6.20
  -1   5   3   57.49    5.60
   1   5  -3   59.09    5.00
   1   5  -3   75.09    4.90
  -1   5   3   71.29    3.40
  -1  -5   3   70.89    3.90
   1  -5  -3   73.59    3.90
   1  -5  -3   61.89    8.90
   1  -5  -3   74.69    3.40
  -1  -5   3   78.99    5.00
  -1  -5   3   68.79    6.00
  -1   5   2   34.70    1.80
   1   5  -2   32.00    4.00
   1   5  -2   30.60    2.10
   1   5  -2   32.20    4.50
  -1   5   2   24.30    6.20
  -1   5   2   28.80    2.50
   1   5  -2   33.10    3.10
  -1  -5   2   32.90    2.30
   1  -5  -2   33.10    1.70
   1  -5  -2   39.90    6.00
   1  -5  -2   40.70    8.30
  -1  -5   2   30.10    4.10
   1  -5  -2   29.20    2.60
  -1  -5   2   33.00    4.10
  -1  -5   2   30.10    3.00
   1   5  -1    7.70    2.50
  -1   5   1    4.20    1.30
   1   5  -1    5.30    2.50
  -1   5   1    5.30    0.60
  -1   5   1    3.50    1.60
  -1   5   1    4.90    3.30
   1   5  -1    6.00    0.90
   1   5  -1    8.60    1.90
  -1   5   1    5.50    0.50
   1  -5  -1    4.00    1.30
  -1  -5   1    6.20    1.00
   1  -5  -1    2.70    2.90
  -1  -5   1    7.70    1.70
  -1  -5   1    5.90    2.20
   1  -5  -1    2.50    2.00
  -1  -5   1    6.50    2.80
   1   5   0   53.09    4.40
   1   5   0   53.89    3.60
  -1   5   0   52.39    2.00
  -1   5   0   51.89    3.80
  -1   5   0   47.90    6.60
  -1   5   0   54.19    5.30
   1   5   0   58.69    7.00
  -1  -5   0   51.99    2.00
   1  -5   0   55.19    2.10
  -1  -5   0   61.29    3.80
  -1  -5   0   57.19    2.00
   1  -5   0   53.59    6.80
  -1  -5   0   64.59    5.00
   1  -5   0   52.99    3.80
  -1  -5   0   52.99    6.80
   1  -5   0   51.89    5.30
   1   5   1    0.30    0.50
   1   5   1    1.00    1.20
   1   5   1    0.40    2.60
  -1   5  -1    1.40    0.50
  -1   5  -1    1.20    1.70
  -1   5  -1    0.60    0.70
  -1   5  -1    1.60    2.10
   1   5   1    0.40    0.40
  -1  -5  -1    1.00    0.30
  -1  -5  -1    1.00    0.70
   1  -5   1    0.60    0.50
   1  -5   1    1.70    1.10
  -1  -5  -1    1.70    1.70
  -1  -5  -1    1.90    3.20
   1  -5   1    0.00    2.00
   1  -5   1    2.20    1.80
  -1   5  -2  227.88   11.80
  -1   5  -2  225.08    7.30
   1   5   2  216.88    6.40
  -1   5  -2  221.88    9.00
  -1   5  -2  221.78   11.90
   1   5   2  223.28    9.80
   1   5   2  220.88   15.40
   1   5   2  221.78    7.10
   1  -5   2  218.58    7.20
   1  -5   2  240.78   12.00
  -1  -5  -2  212.98    6.40
  -1  -5  -2  208.28   15.00
  -1  -5  -2  216.28    7.10
   1  -5   2  225.08   11.40
   1  -5   2  224.08    8.90
  -1   5  -3    8.30    2.30
   1   5   3    9.40    5.00
  -1   5  -3    6.40    3.20
   1   5   3    7.50    2.60
  -1   5  -3    4.60    2.60
   1   5   3    6.70    1.20
   1   5   3    7.20    1.50
  -1   5  -3    6.80    1.70
   1  -5   3    6.80    2.80
   1  -5   3    8.00    1.80
   1  -5   3    6.20    1.90
  -1  -5  -3    8.80    1.70
   1  -5   3    9.30    3.70
  -1  -5  -3    5.10    3.70
  -1  -5  -3    6.90    1.30
  -1   5  -4  553.84   15.80
  -1   5  -4  562.74   21.90
   1   5   4  525.85   14.50
   1   5   4  547.25   27.40
  -1   5  -4  533.25   18.70
   1   5   4  542.45   12.10
  -1   5  -4  518.55   16.50
  -1  -5  -4  539.75   14.70
   1  -5   4  550.14   19.30
  -1  -5  -4  521.95   12.00
   1  -5   4  538.35   20.70
  -1  -5  -4  578.14   28.60
   1  -5   4  507.85   16.10
   1  -5   4  509.15   15.30
   1   5   5  104.49    5.80
  -1   5  -5  103.69    6.40
   1   5   5   84.09   12.10
  -1   5  -5  110.59    8.00
  -1   5  -5   88.99    9.20
   1   5   5  106.99    3.30
   1  -5   5  111.49    6.40
  -1  -5  -5  107.59    3.30
   1  -5   5  111.69    9.70
  -1  -5  -5  102.29    5.90
  -1  -5  -5   91.39   12.00
  -1   5  -6 1262.17   32.20
   1   5   6 1308.07   49.40
  -1   5  -6 1262.87   40.90
  -1   5  -6 1274.77   32.60
  -1   5  -6 1333.57   35.60
   1   5   6 1255.77   31.10
   1  -5   6 1293.07   32.40
   1  -5   6 1296.17   36.60
  -1  -5  -6 1331.07   50.69
   1  -5   6 1283.07   32.10
  -1  -5  -6 1299.27   31.50
  -1   5  -7   13.50    4.30
  -1   5  -7   36.40    8.70
  -1   5  -7   21.20    5.40
  -1   5  -7   20.40    4.00
   1   5   7   16.50    5.50
   1   5   7   24.30    4.00
  -1   5  -7   25.40    4.10
   1   5   7   15.30    8.00
   1  -5   7   26.90    4.20
  -1  -5  -7   33.10    4.90
   1  -5   7   13.70    4.90
  -1  -5  -7   30.10    9.40
   1  -5   7   24.30    4.40
  -1   5  -8   18.70    5.80
  -1   5  -8   15.60    6.80
  -1   5  -8   22.20    4.70
   1   5   8   20.70    4.20
  -1   5  -8   13.80    4.40
   1   5   8   17.70    9.10
  -1   5  -8   15.10    3.40
   1   5   8   18.90    7.00
   1  -5   8   23.80    4.70
   1  -5   8   21.60    6.90
   1  -5   8   25.70    4.40
  -1  -5  -8   38.50   11.60
  -1  -5  -8   27.90    4.80
  -1   5  -9    0.60    2.30
  -1   5  -9    0.70    1.70
  -1   5  -9   -1.90    4.30
   1   5   9    1.80    5.10
  -1   5  -9   -2.00    4.10
   1   5   9    0.50    8.40
   1   5   9    1.70    2.50
  -1   5  -9    1.30    4.40
   1  -5   9    1.80    2.60
  -1  -5  -9    3.40    2.50
  -1  -5  -9    1.40    7.70
   1  -5   9    0.90    1.70
  -1   5 -10    8.20    3.20
  -1   5 -10    7.90    2.70
  -1   5 -10    3.60    5.10
   1   5  10    5.30    9.70
   1   5  10    3.00    2.80
  -1   5 -10    0.40    4.70
  -1   5 -10    8.40    5.80
   1   5  10    6.20    6.10
   1  -5  10   -0.90    5.40
   1  -5  10    9.40    3.00
  -1  -5 -10   -0.70    7.90
   1  -5  10    5.50    3.30
  -1  -5 -10    4.10    3.20
   1   5  11   95.09   16.30
  -1   5 -11   41.40    8.80
   1   5  11   72.19   17.20
  -1   5 -11   54.39    7.90
  -1   5 -11   65.19    6.70
   1   5  11   48.80    8.00
  -1   5 -11   56.69   11.20
  -1   5 -11   50.79   10.20
  -1  -5 -11   49.50   15.80
  -1  -5 -11   77.59    7.90
   1  -5  11   64.59    8.50
   1  -5  11   70.39   14.00
   1  -5  11   55.39    6.30
   1   5  12  209.28   13.80
  -1   5 -12  225.28   14.80
  -1   5 -12  241.18   13.10
   1   5  12  238.78   22.70
   1   5  12  226.88   27.50
  -1   5 -12  222.68   22.30
  -1   5 -12  246.38   18.70
  -1   5 -12  223.18   22.90
  -1  -5 -12  226.78   14.20
  -1  -5 -12  214.08   27.20
   1  -5  12  233.98   12.60
  -1   5 -13  189.58   18.70
   1   5  13  253.77   24.50
  -1   5 -13  237.78   15.80
  -1   5 -13  235.48   13.30
  -1   5 -13  236.58   22.00
  -1   5 -13  263.47   25.50
  -1  -5 -13  205.18   28.70
  -1  -5 -13  238.38   15.30
   1  -5  13  258.17   13.40
  -1   5 -14  187.18   12.30
  -1   5 -14  220.28   21.20
  -1   5 -14  218.08   16.00
  -1   5 -14  202.38   22.10
   1   5  14  215.38   28.40
  -1  -5 -14  199.38   14.60
   1  -5  14  207.88   12.60
  -1  -5 -14  235.48   32.70
  -1   5 -15   63.79   16.00
  -1   5 -15   85.49   21.50
  -1   5 -15   47.00    9.50
  -1   5 -15   77.09    8.50
  -1   5 -15   48.50   13.90
  -1  -5 -15   40.90   21.30
  -1  -5 -15   74.19   11.60
   1  -5  15   75.89    9.00
  -1   5 -16    4.40    6.70
   1   5  16    3.60   29.00
  -1   5 -16   -5.90   14.00
  -1   5 -16   -2.50   14.60
  -1   5 -16   -4.60   13.70
  -1   5 -16    1.60    4.10
  -1  -5 -16    6.30   19.10
  -1  -5 -16   12.90    5.50
  -1   5 -17    1.60    4.50
  -1   5 -17  -15.60   16.30
  -1   5 -17    8.00   17.40
  -1   5 -17   -9.60   17.50
  -1   5 -17    1.70    6.60
  -1  -5 -17    0.10    6.40
  -1  -5 -17   24.90   23.60
  -1   5 -18   11.60    6.00
  -1   5 -18    4.60   19.80
  -1  -5 -18    6.70   28.30
  -1  -5 -18   -5.40    8.90
  -1   5 -19   35.70    8.00
  -1  -5 -19   55.19   34.20
   1   6 -19  226.38   16.80
   1  -6 -19  281.67   49.50
   1   6 -18   -9.70   13.10
   1   6 -18   -1.30    5.30
   1  -6 -18    4.70    6.50
   1   6 -17   -3.00   11.70
   1   6 -17    4.80   15.60
   1   6 -17    1.80    4.40
   1   6 -17   -0.30   11.00
   1   6 -17    0.30    6.50
   1  -6 -17   -1.50   20.90
   1  -6 -17    2.90    5.60
   1   6 -16    3.30    4.20
   1   6 -16    0.10    5.90
   1   6 -16    0.00    9.30
   1   6 -16  -11.90   12.80
   1   6 -16    0.10    9.40
   1  -6 -16    5.40    5.00
   1  -6 -16   -3.60   17.90
   1   6 -15  302.57   30.00
   1   6 -15  273.87   18.30
  -1   6  15  188.98   29.20
   1   6 -15  299.87   16.60
   1  -6 -15  327.67   37.40
   1  -6 -15  265.97   17.10
   1   6 -14   12.30    9.80
   1   6 -14   10.40    7.60
   1   6 -14   11.50    7.10
   1   6 -14   17.40    5.00
  -1   6  14    1.30   11.50
   1   6 -14    3.60    4.60
  -1  -6  14   14.90    4.80
   1  -6 -14   -0.10   13.90
   1  -6 -14   20.20    5.70
   1   6 -13 1623.94   43.50
   1   6 -13 1635.14   63.89
  -1   6  13 1616.24   62.09
   1   6 -13 1609.24   47.40
   1   6 -13 1561.34   44.20
  -1   6  13 1671.83   46.30
   1   6 -13 1673.73   46.50
   1  -6 -13 1766.82   75.29
  -1  -6  13 1594.74   43.70
   1  -6 -13 1546.35   46.40
  -1   6  12   38.80   11.30
  -1   6  12   26.60   13.90
   1   6 -12   22.50    5.80
   1   6 -12   36.10    7.20
  -1   6  12   35.30    6.30
  -1   6  12   31.20    1.70
   1   6 -12   31.10    6.10
   1   6 -12   23.00    8.80
  -1   6  12   32.60    1.70
   1   6 -12   28.80    6.00
   1  -6 -12   19.10   13.00
   1  -6 -12   28.70    5.90
  -1  -6  12   22.10    5.60
  -1   6  11  821.22   47.40
   1   6 -11  843.22   29.00
   1   6 -11  854.11   40.10
  -1   6  11  862.71   18.10
   1   6 -11  907.81   26.10
   1   6 -11  877.81   27.90
  -1   6  11  864.81   27.70
   1   6 -11  839.92   27.60
  -1   6  11  830.02   39.50
  -1   6  11  871.91   18.00
   1  -6 -11  871.61   48.30
   1  -6 -11  846.32   27.80
  -1  -6  11  808.42   26.80
  -1  -6  11  828.72   28.60
  -1   6  10    0.80    8.40
  -1   6  10    1.80    6.80
  -1   6  10    2.70    2.70
   1   6 -10    3.90    3.80
  -1   6  10    6.20    1.20
   1   6 -10   10.20    7.30
  -1   6  10    5.20    1.20
   1   6 -10    6.60    3.40
   1   6 -10   12.00    3.60
   1   6 -10    5.50    3.40
  -1  -6  10    4.90    2.60
   1  -6 -10    4.30    2.40
  -1  -6  10    8.80    3.90
   1  -6 -10   19.30   10.10
   1   6  -9  747.73   22.40
  -1   6   9  773.72   17.20
  -1   6   9  768.42   41.80
  -1   6   9  760.72   23.60
  -1   6   9  760.22   17.00
   1   6  -9  757.92   34.10
   1   6  -9  722.63   24.00
   1   6  -9  767.52   25.00
   1   6  -9  735.93   20.70
  -1  -6   9  712.43   24.10
  -1  -6   9  769.82   24.20
   1  -6  -9  727.73   41.20
  -1  -6   9  756.02   31.80
   1  -6  -9  781.62   23.80
   1   6  -8   18.60    4.00
   1   6  -8   16.60    3.70
   1   6  -8   14.50    5.80
   1   6  -8   22.10    4.10
  -1   6   8   25.20    4.10
   1   6  -8   15.70    3.00
  -1   6   8   18.90    1.90
  -1   6   8   21.00    9.40
   1  -6  -8   16.80    9.20
   1  -6  -8   24.70    4.20
  -1  -6   8   20.60    4.10
  -1  -6   8    8.40    6.10
   1  -6  -8   23.10    2.20
  -1  -6   8   15.30    3.50
   1   6  -7  496.75   17.80
   1   6  -7  495.35   24.00
  -1   6   7  518.15   13.00
   1   6  -7  498.55   14.50
   1   6  -7  489.75   14.10
   1   6  -7  505.35   17.50
  -1   6   7  503.25   16.20
  -1   6   7  496.75   31.20
   1  -6  -7  530.85   31.70
  -1  -6   7  536.15   17.80
   1  -6  -7  501.45   12.90
   1  -6  -7  511.65   16.30
  -1  -6   7  513.75   17.80
  -1  -6   7  508.25   22.80
   1   6  -6   18.90    3.50
   1   6  -6   14.90    2.80
   1   6  -6   24.80    6.40
  -1   6   6   13.60    2.70
  -1   6   6   24.40    8.30
  -1   6   6   16.80    5.00
   1   6  -6   19.00    3.70
  -1   6   6   20.60    2.10
  -1  -6   6   16.70    3.50
   1  -6  -6   15.50    7.40
  -1  -6   6   16.60    3.20
   1  -6  -6   24.40    3.60
  -1  -6   6   16.00    5.00
   1  -6  -6   18.00    2.00
   1   6  -5 3796.42   75.99
  -1   6   5 3748.53   72.79
   1   6  -5 3729.73   85.39
  -1   6   5 3791.92   74.09
  -1   6   5 3803.92   99.89
   1   6  -5 3754.82   78.19
  -1   6   5 3754.72   83.69
   1   6  -5 3716.03   74.79
  -1  -6   5 3787.32   74.49
  -1  -6   5 3779.02   83.59
   1  -6  -5 3739.33   73.89
   1  -6  -5 3701.03   72.59
   1  -6  -5 3870.11   99.59
  -1  -6   5 3765.62   77.89
  -1  -6   5 3792.62   75.99
  -1   6   4    5.00    1.40
  -1   6   4    6.10    5.30
   1   6  -4    3.80    1.50
  -1   6   4    3.20    1.20
  -1   6   4    3.50    2.10
   1   6  -4    3.60    2.20
   1   6  -4    3.50    2.40
  -1  -6   4    4.20    1.50
  -1  -6   4    1.30    1.80
   1  -6  -4    6.20    1.50
   1  -6  -4    4.70    1.20
  -1  -6   4    4.60    2.70
  -1  -6   4    4.40    1.70
  -1   6   3 4474.55   84.09
  -1   6   3 4524.55   86.69
   1   6  -3 4523.35   94.59
  -1   6   3 4500.15   94.19
   1   6  -3 4441.36   85.59
   1   6  -3 4374.66   89.49
  -1   6   3 4501.75  108.09
   1   6  -3 4484.25   92.59
  -1  -6   3 4468.65   89.49
  -1  -6   3 4475.45   91.79
  -1  -6   3 4558.04   93.39
   1  -6  -3 4615.84   96.19
   1  -6  -3 4438.76   86.59
   1  -6  -3 4346.27   83.79
   1  -6  -3 4537.85  108.49
  -1  -6   3 4524.05   85.99
  -1   6   2    0.20    0.40
  -1   6   2   -0.70    3.20
   1   6  -2    0.40    0.50
  -1   6   2   -0.30    0.70
   1   6  -2    0.10    1.70
   1   6  -2    0.30    0.80
  -1   6   2    0.80    1.40
   1   6  -2   -0.30    2.20
  -1  -6   2    0.30    1.90
  -1  -6   2   -0.10    1.00
   1  -6  -2   -2.50    2.90
  -1  -6   2    0.00    0.60
  -1  -6   2    2.60    2.30
   1  -6  -2    2.20    2.70
   1  -6  -2    0.90    0.90
   1  -6  -2    0.40    0.40
  -1   6   1 1048.00   29.60
  -1   6   1 1063.49   25.20
  -1   6   1 1068.69   36.80
   1   6  -1 1055.49   21.00
   1   6  -1 1051.19   25.50
   1   6  -1 1013.10   28.10
   1   6  -1 1049.20   32.90
   1  -6  -1 1071.99   30.30
  -1  -6   1 1068.09   33.20
  -1  -6   1 1054.19   28.30
  -1  -6   1 1057.29   21.20
   1  -6  -1 1050.99   25.20
   1  -6  -1 1062.19   36.30
  -1  -6   1 1046.00   25.50
  -1   6   0    8.70    4.30
   1   6   0   10.40    2.20
   1   6   0    5.90    3.60
  -1   6   0    7.40    0.70
  -1   6   0    6.40    0.80
  -1   6   0    5.50    1.80
   1   6   0    5.70    2.10
  -1   6   0    8.20    3.40
  -1  -6   0    8.40    0.70
   1  -6   0    5.30    2.50
  -1  -6   0    6.30    3.60
   1  -6   0    7.90    1.80
  -1  -6   0    6.40    2.50
  -1  -6   0   12.80    2.40
  -1  -6   0    7.90    0.80
   1  -6   0    6.50    3.90
  -1   6  -1 1689.43   33.80
   1   6   1 1740.53   40.40
  -1   6  -1 1754.12   38.80
  -1   6  -1 1651.73   43.20
  -1   6  -1 1693.43   47.10
   1   6   1 1741.63   36.90
   1   6   1 1752.62   50.99
   1  -6   1 1717.63   38.50
  -1  -6  -1 1726.23   50.99
   1  -6   1 1753.22   34.00
   1  -6   1 1707.73   43.20
   1  -6   1 1766.02   47.20
  -1  -6  -1 1657.83   32.50
  -1  -6  -1 1706.73   36.80
  -1  -6  -1 1726.33   32.70
  -1  -6  -1 1829.62   41.50
   1   6   2    0.40    3.50
  -1   6  -2   11.90    2.40
  -1   6  -2    9.50    3.30
  -1   6  -2    5.40    3.20
  -1   6  -2    8.90    1.60
   1   6   2    8.40    1.70
   1   6   2   10.00    1.40
   1   6   2    7.70    2.40
  -1  -6  -2   10.30    1.40
   1  -6   2   12.20    1.80
  -1  -6  -2    9.80    2.90
   1  -6   2   14.40    5.20
  -1  -6  -2   11.90    2.00
   1  -6   2    3.10    2.80
  -1  -6  -2    7.40    4.60
   1  -6   2   11.30    2.60
  -1   6  -3 4760.32   98.29
   1   6   3 4511.05   86.99
  -1   6  -3 4532.35   88.29
  -1   6  -3 4551.44   91.79
   1   6   3 4666.53  110.39
   1   6   3 4446.06   86.59
   1   6   3 4669.03   94.59
  -1   6  -3 4594.84   99.09
   1  -6   3 4616.64   97.49
  -1  -6  -3 4501.15   87.09
   1  -6   3 4716.83   97.69
   1  -6   3 4468.35   88.19
   1  -6   3 4564.34   91.89
  -1  -6  -3 4493.85   86.69
  -1  -6  -3 4559.94  111.19
  -1   6  -4   12.00    2.40
   1   6   4   12.10    3.70
   1   6   4    9.90    5.00
  -1   6  -4   14.10    3.10
   1   6   4   12.80    1.80
  -1   6  -4    9.20    4.10
  -1   6  -4    6.30    3.30
   1   6   4    8.90    1.90
   1  -6   4    4.50    2.70
  -1  -6  -4   10.40    2.00
   1  -6   4    8.40    2.40
   1  -6   4    6.30    3.10
   1  -6   4    8.80    2.20
  -1  -6  -4    9.90    1.60
  -1  -6  -4   12.90    6.20
   1   6   5 6050.29  141.39
  -1   6  -5 6014.00  117.99
  -1   6  -5 6008.10  120.89
   1   6   5 5555.84  109.59
   1   6   5 5872.41  122.59
  -1   6  -5 5969.80  127.89
  -1   6  -5 5944.01  115.89
   1   6   5 5761.92  113.79
   1  -6   5 6127.49  125.89
  -1  -6  -5 6068.19  143.19
   1  -6   5 6000.20  121.69
  -1  -6  -5 5935.61  114.19
   1  -6   5 5865.41  117.19
  -1  -6  -5 5913.51  109.69
   1  -6   5 5837.52  115.49
  -1   6  -6   25.20    8.30
  -1   6  -6   20.40    3.50
   1   6   6   20.90    8.40
   1   6   6   21.50    1.40
   1   6   6   17.60    3.00
  -1   6  -6   20.90    3.90
  -1   6  -6   15.40    4.30
   1  -6   6   16.50    5.00
   1  -6   6   11.20    3.90
  -1  -6  -6   24.20    3.70
   1  -6   6   23.20    3.90
   1  -6   6   19.70    3.70
  -1  -6  -6   22.50    8.80
  -1  -6  -6   20.90    1.40
  -1   6  -7 1118.79   30.80
  -1   6  -7 1123.39   31.00
   1   6   7 1088.49   38.80
   1   6   7 1117.39   48.50
   1   6   7 1155.38   29.30
  -1   6  -7 1114.09   32.60
  -1   6  -7 1130.69   40.40
   1  -6   7 1075.49   30.20
   1  -6   7 1158.08   38.50
  -1  -6  -7 1114.09   29.40
   1  -6   7 1188.18   35.10
   1  -6   7 1127.99   30.50
  -1  -6  -7 1133.09   50.19
  -1   6  -8    0.70    3.70
   1   6   8    4.60    8.10
   1   6   8    2.60    4.80
   1   6   8   -1.60    1.70
  -1   6  -8    1.00    3.70
  -1   6  -8   -1.40    1.60
  -1   6  -8    1.20    3.60
  -1   6  -8    0.90    1.50
   1  -6   8   -4.30    5.30
  -1  -6  -8   -2.20    1.40
   1  -6   8   -0.10    2.10
   1  -6   8    0.70    1.70
  -1  -6  -8   -1.10    6.80
   1   6   9   16.00    7.30
   1   6   9    8.20    3.00
  -1   6  -9   15.40    5.50
  -1   6  -9   10.60    3.60
  -1   6  -9   16.50    5.10
   1   6   9    4.40    9.40
  -1   6  -9   14.60    6.40
  -1   6  -9   18.10    4.20
  -1  -6  -9   10.20    3.30
   1  -6   9   11.00    6.60
   1  -6   9    9.70    3.30
  -1  -6  -9   18.50    9.90
   1  -6   9   18.20    4.30
  -1   6 -10   12.40    3.60
   1   6  10   13.20    7.40
  -1   6 -10    7.80    6.00
   1   6  10   17.00    4.50
  -1   6 -10   16.10    4.50
   1   6  10    6.20   12.60
  -1   6 -10    7.80    6.00
  -1   6 -10   10.90    5.50
  -1  -6 -10    6.00    3.10
   1  -6  10    3.50    6.40
   1  -6  10   11.30    3.50
  -1  -6 -10    3.40    8.50
   1  -6  10   10.70    3.70
  -1   6 -11  948.21   32.30
  -1   6 -11 1007.30   38.00
   1   6  11  935.61   50.69
  -1   6 -11 1018.70   34.90
   1   6  11  974.10   31.30
  -1   6 -11  977.20   30.40
  -1   6 -11 1032.50   46.00
  -1  -6 -11  966.90   53.39
  -1  -6 -11 1031.40   31.80
   1  -6  11  948.31   31.70
   1  -6  11  974.40   29.80
  -1   6 -12   12.40    8.90
   1   6  12   14.10    9.20
   1   6  12   14.20    4.90
  -1   6 -12    7.60    9.10
  -1   6 -12    9.10    7.80
  -1   6 -12   15.30    5.30
  -1   6 -12   15.00    4.30
  -1  -6 -12    6.50   13.30
  -1  -6 -12    6.20    4.20
  -1   6 -13 1704.53   47.20
  -1   6 -13 1870.51   69.79
  -1   6 -13 2100.79  101.19
  -1   6 -13 1757.22   51.19
  -1   6 -13 1803.32   53.39
   1   6  13 1651.73   63.49
  -1  -6 -13 1786.52   80.19
   1  -6  13 1784.12   46.70
  -1  -6 -13 1741.63   49.70
  -1   6 -14    4.30    9.20
  -1   6 -14   13.00    4.80
  -1   6 -14    7.40   10.20
  -1   6 -14   11.40    5.60
   1   6  14    3.70   13.40
  -1   6 -14   12.50   12.00
   1  -6  14    9.80    4.80
  -1  -6 -14   15.70    5.50
  -1  -6 -14   15.00   14.90
  -1   6 -15  201.88   21.70
  -1   6 -16    3.90   13.90
  -1   6 -16   14.80   13.70
  -1   6 -16    4.00    4.40
  -1   6 -16    4.80   15.70
  -1  -6 -16   -9.00   20.70
  -1  -6 -16    8.90    5.70
  -1   6 -17   28.60   20.10
  -1   6 -17   29.30    9.10
  -1   6 -17   29.10    7.20
  -1   6 -17   -9.30   15.00
  -1  -6 -17   35.20   30.50
  -1  -6 -17   14.00    8.80
  -1   6 -18   -4.70   20.80
  -1   6 -18   -1.20    5.70
  -1   6 -18    8.60   20.60
  -1  -6 -18  -17.10   29.20
  -1  -6 -18   -1.90   11.10
  -1   6 -19  152.88   15.00
   1   7 -19  131.29   14.60
   1   7 -18   -1.60    5.70
   1  -7 -18    4.80    6.50
   1  -7 -18   25.90   27.60
   1   7 -17    6.20    7.60
   1   7 -17    0.10    7.60
   1   7 -17    1.50    8.00
   1   7 -17   -0.60    5.00
   1   7 -17    7.30   17.20
   1  -7 -17   -1.70    5.80
   1  -7 -17  -15.90   22.70
   1   7 -16   -1.50    7.10
   1   7 -16   18.70    5.90
   1   7 -16   -8.20    6.70
   1   7 -16   12.10    7.00
   1   7 -16   18.40   13.50
   1  -7 -16   14.60   20.00
   1  -7 -16    8.30    5.40
   1   7 -15   24.80   12.60
   1   7 -15   32.80    6.90
   1   7 -15   22.10    7.00
  -1   7  15  -23.50   15.60
   1  -7 -15   37.00    8.10
   1  -7 -15   34.60   19.10
  -1   7  14   11.70   13.10
   1   7 -14    3.10    5.60
   1   7 -14   12.40    4.40
   1   7 -14   -1.90    5.70
   1   7 -14   14.60    9.90
   1   7 -14   12.40    4.70
   1  -7 -14   14.10    4.80
   1  -7 -14    8.50   15.00
   1   7 -13  241.58   16.30
   1   7 -13  179.08   11.00
   1   7 -13  238.48   15.50
  -1   7  13  236.48   14.50
   1   7 -13  233.78   24.20
   1   7 -13  193.58   12.10
  -1   7  13  281.47   28.20
  -1  -7  13  248.98   14.40
   1  -7 -13  218.58   14.20
   1  -7 -13  190.28   28.30
   1   7 -12   59.89   10.30
   1   7 -12  101.99   18.60
   1   7 -12   62.19    7.70
   1   7 -12   74.09    7.40
  -1   7  12   65.19   15.50
  -1   7  12   69.49    8.90
   1   7 -12   80.19    8.00
   1  -7 -12   72.29    8.70
  -1  -7  12   56.29    7.80
  -1  -7  12   72.69    9.70
   1  -7 -12   80.29   20.70
  -1   7  11  127.59    9.90
   1   7 -11  144.99   10.70
  -1   7  11  157.78   21.60
  -1   7  11  140.39    4.30
  -1   7  11  135.79    4.20
   1   7 -11  133.39   10.70
   1   7 -11  139.29   16.80
   1   7 -11  120.39    8.50
  -1   7  11  103.99   21.50
   1  -7 -11   92.59   19.00
  -1  -7  11  128.39   11.80
   1  -7 -11  137.19    9.90
  -1  -7  11  119.89   10.10
  -1   7  10    0.50    0.90
  -1   7  10    4.30    3.00
   1   7 -10    0.00    2.40
  -1   7  10    0.70    0.80
   1   7 -10    1.60    6.30
  -1   7  10    5.50   11.60
   1   7 -10    6.80    3.10
  -1   7  10   -3.60    6.80
   1   7 -10    0.30    2.30
   1   7 -10    3.30    3.00
  -1  -7  10   -0.30    2.40
   1  -7 -10   -2.70    8.00
  -1  -7  10   -0.30    2.60
   1  -7 -10   -0.40    1.90
  -1   7   9   69.69    3.60
  -1   7   9   68.29    3.70
   1   7  -9   51.89    4.60
  -1   7   9   68.09    6.40
   1   7  -9   69.79    6.90
   1   7  -9   93.69   14.30
   1   7  -9   64.29    5.20
   1   7  -9   44.70    6.20
  -1   7   9   60.09   16.60
   1  -7  -9   60.59    6.10
   1  -7  -9   43.90   13.30
  -1  -7   9   59.59    6.70
  -1  -7   9   65.39    6.70
   1   7  -8    8.30    2.60
   1   7  -8    5.80    2.30
  -1   7   8    9.00    1.80
  -1   7   8   12.40    9.40
   1   7  -8    8.40    2.40
  -1   7   8    9.50    4.50
   1   7  -8    7.60    3.00
  -1   7   8    6.10    2.40
   1   7  -8    0.00    3.70
   1  -7  -8    7.30    8.00
   1  -7  -8    8.90    1.70
   1  -7  -8   10.30    2.90
  -1  -7   8   12.00    2.90
  -1  -7   8   15.10    4.00
  -1  -7   8   10.10    6.00
  -1   7   7   35.80    6.70
   1   7  -7   65.99    6.20
   1   7  -7   44.90    8.90
   1   7  -7   55.29    4.60
  -1   7   7   64.29    5.30
   1   7  -7   56.59    5.60
  -1   7   7   67.09    3.90
  -1   7   7   51.89   13.70
   1   7  -7   55.39    4.40
  -1  -7   7   42.10    7.70
   1  -7  -7   68.39    3.80
  -1  -7   7   73.49    6.40
   1  -7  -7   55.29    4.90
   1  -7  -7   58.39   13.90
  -1  -7   7   65.09    5.90
  -1   7   6   30.50    3.30
   1   7  -6   30.80    4.70
   1   7  -6   24.90    3.90
   1   7  -6   28.50    6.50
   1   7  -6   30.00    4.00
  -1   7   6   26.90    6.00
  -1   7   6   43.20   12.30
  -1   7   6   29.40    2.70
   1  -7  -6   24.60    9.20
   1  -7  -6   28.80    2.60
  -1  -7   6   30.20    5.10
  -1  -7   6   36.80    8.00
   1  -7  -6   34.40    3.50
  -1  -7   6   30.90    3.90
  -1   7   5   83.99    8.30
  -1   7   5  103.59    5.20
  -1   7   5  101.39    5.20
   1   7  -5   81.89    6.50
   1   7  -5   91.09    5.70
   1   7  -5   79.39    8.70
   1   7  -5   99.89    7.00
  -1   7   5   93.09   13.60
   1  -7  -5   74.89   13.60
  -1  -7   5  103.69    7.10
  -1  -7   5   97.09    5.90
   1  -7  -5   95.69    5.00
   1  -7  -5   99.99    5.10
  -1  -7   5   89.29   10.30
  -1   7   4  235.08   19.40
  -1   7   4  243.78    8.90
   1   7  -4  236.98    8.80
  -1   7   4  242.08   13.30
  -1   7   4  238.68    7.70
   1   7  -4  244.38   14.00
   1   7  -4  237.58   10.90
   1   7  -4  228.68   11.60
   1  -7  -4  236.88    7.50
  -1  -7   4  240.78   13.20
  -1  -7   4  233.08   10.70
  -1  -7   4  235.48    8.90
   1  -7  -4  221.48    8.50
   1  -7  -4  252.47   19.90
  -1  -7   4  226.48   11.10
   1   7  -3   89.19    8.30
  -1   7   3  106.49    3.90
  -1   7   3   96.69   12.60
  -1   7   3  118.59    6.00
   1   7  -3  109.89    5.00
  -1   7   3   96.69    8.20
   1   7  -3  124.19    7.30
   1   7  -3  108.09    8.80
   1  -7  -3   81.39    8.60
   1  -7  -3   92.79   12.10
   1  -7  -3  105.79    3.80
   1  -7  -3  121.99    6.00
  -1  -7   3  120.49    7.10
  -1  -7   3  103.09    8.40
  -1  -7   3  111.09    5.10
  -1  -7   3   80.59    7.90
  -1   7   2   52.79    1.70
  -1   7   2   46.40    5.80
  -1   7   2   55.69   10.40
   1   7  -2   51.99    5.90
   1   7  -2   53.29    2.90
  -1   7   2   59.99    4.40
   1   7  -2   54.89    7.20
   1   7  -2   53.29    4.60
   1  -7  -2   58.89    4.40
  -1  -7   2   68.69    7.70
  -1  -7   2   52.89    6.10
   1  -7  -2   57.89    7.20
  -1  -7   2   55.49    3.10
  -1  -7   2   54.19    4.70
   1  -7  -2   49.90    1.70
   1  -7  -2   69.19   11.90
   1   7  -1    8.90    2.30
  -1   7   1    5.80    4.70
   1   7  -1    6.80    2.90
   1   7  -1    6.30    1.00
  -1   7   1    7.50    2.00
  -1   7   1    4.60    2.70
   1   7  -1    6.10    4.30
  -1  -7   1    7.30    1.20
  -1  -7   1    5.10    1.70
  -1  -7   1    4.30    3.70
   1  -7  -1    8.20    3.80
  -1  -7   1    8.60    3.20
   1  -7  -1    9.40    2.20
   1  -7  -1    3.00    4.20
  -1   7   0    5.50    4.10
  -1   7   0    8.70    3.10
  -1   7   0    7.10    0.60
   1   7   0    8.40    3.00
  -1   7   0    8.90    2.50
   1   7   0   12.20    2.50
  -1   7   0    7.20    0.60
   1   7   0    7.40    4.50
  -1  -7   0    7.90    0.70
   1  -7   0    8.50    3.10
  -1  -7   0   10.50    4.60
  -1  -7   0   11.10    3.40
   1  -7   0   12.40    5.50
   1  -7   0    7.20    2.20
  -1  -7   0    7.10    1.80
  -1  -7   0    8.40    0.60
   1   7   1   -0.90    3.90
  -1   7  -1    2.10    0.70
  -1   7  -1    1.90    2.20
  -1   7  -1    2.30    3.60
   1   7   1    3.20    1.30
   1   7   1    2.40    2.10
  -1   7  -1    3.10    1.70
  -1  -7  -1    2.80    2.80
   1  -7   1    2.60    0.90
  -1  -7  -1    5.30    4.60
  -1  -7  -1    3.20    1.50
   1  -7   1   -0.20    3.00
   1  -7   1    1.40    1.30
   1  -7   1    3.30    3.20
  -1  -7  -1    2.10    0.40
  -1  -7  -1    2.80    0.50
   1   7   2   15.00    3.30
  -1   7  -2   17.30    2.20
   1   7   2   14.90    2.40
   1   7   2   15.90    1.50
   1   7   2    8.00    5.60
  -1   7  -2   12.40    4.80
  -1   7  -2    9.90    2.50
  -1   7  -2   10.10    3.00
  -1  -7  -2   16.10    1.40
  -1  -7  -2   17.10    6.60
   1  -7   2   12.80    4.80
   1  -7   2   18.60    5.20
   1  -7   2   16.20    3.30
  -1  -7  -2   21.50    4.80
  -1  -7  -2   14.30    2.40
   1  -7   2   15.30    2.10
   1   7   3   16.10    2.40
   1   7   3    5.10    2.40
  -1   7  -3   10.00    4.20
  -1   7  -3   12.00    2.90
   1   7   3   14.30    1.90
  -1   7  -3   13.00    4.40
   1   7   3   15.20    7.00
  -1   7  -3   13.80    2.30
   1  -7   3   18.20    3.40
  -1  -7  -3   14.90    2.40
   1  -7   3   11.60    4.10
   1  -7   3   13.80    2.30
   1  -7   3   14.30    4.90
  -1  -7  -3    7.90    5.30
  -1  -7  -3   13.70    1.90
   1   7   4  821.62   19.10
   1   7   4  775.22   25.80
  -1   7  -4  824.42   24.00
  -1   7  -4  775.22   29.20
   1   7   4  816.02   19.40
  -1   7  -4  799.42   21.00
  -1   7  -4  810.12   27.60
   1   7   4  755.72   36.40
   1  -7   4  795.52   27.10
  -1  -7  -4  792.52   19.10
   1  -7   4  821.82   21.10
   1  -7   4  858.41   29.00
  -1  -7  -4  808.52   38.20
  -1  -7  -4  825.62   19.60
   1  -7   4  798.52   23.40
   1   7   5   36.40    6.50
  -1   7  -5   73.89   11.10
   1   7   5   56.09   12.90
  -1   7  -5   38.60    6.40
  -1   7  -5   55.29    4.80
  -1   7  -5   55.79    5.50
   1   7   5   54.89    3.20
   1   7   5   54.89    4.10
   1  -7   5   51.19    7.00
  -1  -7  -5   51.59    3.10
   1  -7   5   58.79    4.90
  -1  -7  -5   57.29    4.20
   1  -7   5   60.29    5.60
  -1  -7  -5   39.10   11.20
  -1   7  -6  139.59    8.80
   1   7   6  169.18   12.20
   1   7   6  127.89    7.10
   1   7   6  145.89    5.00
  -1   7  -6  145.19   10.50
  -1   7  -6  128.19   12.80
  -1   7  -6  137.89    8.20
   1   7   6  145.49   17.80
  -1  -7  -6  144.19   17.40
  -1  -7  -6  142.49    4.90
   1  -7   6  146.19   10.70
   1  -7   6  149.19    9.00
   1  -7   6  165.48    8.70
  -1  -7  -6  163.68    8.00
   1   7   7   42.30    4.60
  -1   7  -7   51.69   11.20
  -1   7  -7   44.80    5.30
  -1   7  -7   35.30    5.10
   1   7   7   46.50   13.10
   1   7   7   46.80    2.00
  -1   7  -7   33.10    6.30
   1  -7   7   37.50    5.20
  -1  -7  -7   44.00   11.50
  -1  -7  -7   44.90    4.90
   1  -7   7   45.90    5.40
   1  -7   7   63.09   11.20
   1  -7   7   35.90    6.60
  -1  -7  -7   43.20    2.00
   1   7   8  194.18   22.50
  -1   7  -8  216.78   12.00
  -1   7  -8  219.98   13.50
   1   7   8  237.48   11.20
  -1   7  -8  220.48   18.20
   1   7   8  245.98   18.50
  -1   7  -8  234.48   12.10
  -1   7  -8  216.18   14.00
  -1  -7  -8  252.67   25.20
   1  -7   8  226.58   11.80
   1  -7   8  212.58   17.30
   1  -7   8  222.28   11.80
  -1  -7  -8  234.58   11.40
  -1   7  -9   -2.40    4.70
  -1   7  -9    4.50    4.70
   1   7   9    3.00    2.30
  -1   7  -9   -1.50    1.70
  -1   7  -9    2.10    2.50
   1   7   9    4.60    6.70
  -1   7  -9    0.50    4.40
   1  -7   9    2.80    5.30
   1  -7   9    1.00    2.40
  -1  -7  -9    0.90    2.10
  -1  -7  -9   -2.50    7.90
   1  -7   9    2.80    3.10
  -1   7 -10   93.79    9.00
  -1   7 -10  102.39   12.00
  -1   7 -10  101.39   10.80
   1   7  10  115.39   16.70
  -1   7 -10  127.09   18.80
   1   7  10   97.99    8.40
   1   7  10   92.99   19.60
  -1   7 -10   96.19    8.50
   1  -7  10  109.19    8.70
  -1  -7 -10   96.69   20.20
  -1  -7 -10  111.19    8.90
   1  -7  10  104.79   14.00
  -1   7 -11   56.99    9.20
   1   7  11   77.29    9.20
  -1   7 -11   76.29    9.90
  -1   7 -11   45.80   10.30
  -1   7 -11   85.19    8.40
   1   7  11  109.79   17.40
   1   7  11   82.69   20.70
  -1   7 -11   82.09   12.40
   1  -7  11   94.79    8.80
   1  -7  11   73.99    8.10
  -1  -7 -11   73.09    8.00
  -1   7 -12   60.39    8.80
   1   7  12   89.39    9.40
  -1   7 -12   71.69    7.90
   1   7  12   70.19   17.90
  -1   7 -12   90.69   12.20
  -1   7 -12   87.29   13.20
  -1  -7 -12   76.19    9.70
  -1  -7 -12   78.49   20.50
   1  -7  12   74.69    8.20
   1   7  13  163.58   21.50
  -1   7 -13  203.48   23.30
  -1   7 -13  193.78   14.60
  -1   7 -13  226.08   19.40
  -1   7 -13  154.08   16.00
  -1  -7 -13  181.98   31.20
   1  -7  13  228.58   13.90
  -1  -7 -13  216.38   14.20
  -1   7 -14    0.40    3.50
  -1   7 -14   -2.90    4.40
  -1   7 -14  -11.60   10.70
   1   7  14   -8.60   14.10
  -1   7 -14    8.80   11.40
  -1  -7 -14   -3.20    3.70
  -1  -7 -14   -0.30   14.90
  -1   7 -15  110.69   11.00
  -1   7 -15   89.39   19.30
  -1   7 -15   89.89   12.00
  -1  -7 -15   97.49   26.70
  -1  -7 -15  104.89   11.60
  -1   7 -16  -10.70   13.20
  -1   7 -16    3.80    4.70
  -1   7 -16   21.60    7.60
  -1   7 -16   -4.50   12.30
  -1   7 -16    0.10   12.80
  -1  -7 -16   -1.70    5.50
  -1  -7 -16   15.30   22.90
  -1   7 -17   -9.50   18.70
  -1   7 -17    0.20    5.20
  -1   7 -17    5.30   14.40
  -1   7 -17    1.20    7.30
  -1  -7 -17   10.90   24.80
  -1  -7 -17    1.80    6.80
  -1   7 -18  -15.40   21.80
  -1   7 -18   15.60    7.10
  -1  -7 -18   37.60   36.20
   1   8 -19  242.58   19.10
   1   8 -18    3.50    6.00
   1   8 -18  -24.70   25.60
   1  -8 -18   -1.70    7.20
   1  -8 -18  -10.10   28.80
   1   8 -17   19.80   18.70
   1   8 -17   15.10    8.30
   1   8 -17   21.60    7.50
   1  -8 -17   32.30   27.60
   1  -8 -17   18.80    7.00
   1   8 -16    4.30    5.00
   1   8 -16    6.10    6.30
   1   8 -16   -9.20   13.90
   1  -8 -16    0.50    4.90
   1  -8 -16    6.40   21.20
   1   8 -15   61.09   17.30
   1   8 -15   48.30    8.60
   1   8 -15   41.30    8.90
  -1   8  15  -13.30   17.70
   1  -8 -15   38.20   20.30
   1  -8 -15   40.20    8.00
   1   8 -14    5.90    4.40
   1   8 -14   10.20   12.10
  -1   8  14   12.30   15.30
   1   8 -14    8.70    4.70
   1  -8 -14    8.90   14.80
   1  -8 -14    9.60    4.70
   1   8 -13  692.33   41.20
   1   8 -13  780.82   28.90
   1   8 -13  773.22   29.40
  -1   8  13  741.03   42.50
  -1   8  13  762.82   27.80
   1  -8 -13  779.02   52.19
   1  -8 -13  758.52   27.70
   1   8 -12    0.60    4.70
  -1   8  12    4.80    3.80
  -1   8  12   25.50   11.50
   1   8 -12    2.90    8.40
  -1  -8  12    5.90    3.70
   1  -8 -12    4.70    3.20
   1  -8 -12    1.80   13.20
   1   8 -11 1101.99   47.30
  -1   8  11 1065.59   46.70
   1   8 -11 1047.10   33.80
  -1   8  11 1071.29   42.20
  -1   8  11 1058.19   31.50
  -1   8  11 1043.20   20.90
   1   8 -11 1053.89   33.30
  -1   8  11  963.60   62.59
  -1   8  11 1064.39   21.00
  -1  -8  11 1043.10   32.90
   1  -8 -11 1046.80   31.30
  -1  -8  11 1053.59   33.30
  -1   8  10   45.10    3.00
   1   8 -10   32.70    5.90
  -1   8  10   34.50   13.90
  -1   8  10   45.70    6.40
  -1   8  10   48.40    3.00
   1   8 -10   21.50   10.60
  -1   8  10   43.20    9.70
   1   8 -10   43.10    6.80
   1  -8 -10   45.00    6.40
  -1  -8  10   34.90    6.10
  -1  -8  10   41.50    6.50
   1  -8 -10   29.60   13.60
  -1   8   9  641.94   15.70
  -1   8   9  624.24   20.70
  -1   8   9  607.74   47.00
   1   8  -9  624.44   31.90
   1   8  -9  632.14   22.30
   1   8  -9  610.74   23.10
  -1   8   9  676.83   29.90
   1  -8  -9  634.44   41.20
   1  -8  -9  638.04   15.90
  -1  -8   9  684.03   23.70
   1  -8  -9  648.04   20.70
  -1  -8   9  650.83   22.60
  -1   8   8   14.30    2.30
   1   8  -8   11.70    3.20
   1   8  -8   11.00    2.10
  -1   8   8   13.60    6.00
  -1   8   8   12.20    3.10
   1   8  -8   20.20    7.80
   1   8  -8   12.30    3.70
  -1   8   8   10.80   10.40
   1   8  -8   14.20    2.40
  -1  -8   8   13.00    3.70
   1  -8  -8   15.40    9.80
   1  -8  -8   11.40    2.80
   1  -8  -8   19.10    2.70
  -1  -8   8   12.10    3.50
  -1   8   7 1209.78   29.20
   1   8  -7 1187.68   27.90
  -1   8   7 1183.68   38.90
   1   8  -7 1181.18   33.40
   1   8  -7 1154.68   30.70
  -1   8   7 1172.58   53.29
   1   8  -7 1157.58   41.30
  -1   8   7 1198.18   26.80
   1  -8  -7 1149.69   26.50
   1  -8  -7 1134.19   52.19
  -1  -8   7 1170.08   31.00
  -1  -8   7 1176.18   33.00
   1  -8  -7 1144.89   28.60
   1   8  -6    6.00    4.00
   1   8  -6    6.80    2.60
  -1   8   6    8.40    2.10
  -1   8   6    5.80    3.70
  -1   8   6    6.70    2.00
   1   8  -6    4.00    2.30
   1   8  -6    6.40    3.20
  -1   8   6    9.80    7.80
  -1  -8   6    3.90    2.60
   1  -8  -6    6.40    1.70
   1  -8  -6    1.30    5.90
  -1  -8   6    8.40    2.90
  -1  -8   6    3.00    3.70
   1  -8  -6    4.70    1.70
  -1  -8   6    6.90    2.60
  -1   8   5 2736.23   66.39
   1   8  -5 2766.92   68.89
  -1   8   5 2758.42   84.49
   1   8  -5 2701.43   56.59
  -1   8   5 2719.83   55.69
   1   8  -5 2711.63   60.99
  -1   8   5 2682.43   54.29
   1   8  -5 2632.34   60.79
  -1  -8   5 2718.33   66.09
  -1  -8   5 2697.03   56.69
   1  -8  -5 2622.14   55.39
  -1  -8   5 2663.93   59.69
   1  -8  -5 2738.23   83.49
  -1  -8   5 2751.42   60.89
   1  -8  -5 2721.83   54.19
  -1   8   4   22.70    9.50
   1   8  -4   23.70    3.20
  -1   8   4   18.80    2.00
  -1   8   4   18.20    4.80
   1   8  -4   29.00    6.60
  -1   8   4   22.60    2.90
   1   8  -4   13.30    4.50
   1   8  -4   15.50    3.40
   1  -8  -4   22.10    3.40
   1  -8  -4   16.50    2.00
  -1  -8   4   16.30    3.80
   1  -8  -4   15.90    7.10
  -1  -8   4   15.70    4.50
  -1  -8   4   16.60    4.70
  -1  -8   4   16.50    2.70
   1   8  -3 4968.20  101.89
  -1   8   3 4973.80   98.69
  -1   8   3 4901.01  123.39
  -1   8   3 4962.00  106.69
  -1   8   3 4872.01   92.79
   1   8  -3 5004.00  107.69
   1   8  -3 5017.90   95.59
   1   8  -3 5002.70  108.49
   1  -8  -3 5706.23  122.69
   1  -8  -3 4876.91   92.59
   1  -8  -3 5037.90  123.99
  -1  -8   3 4996.20  101.69
   1  -8  -3 5108.79   98.99
  -1  -8   3 5072.49  108.29
  -1  -8   3 5063.09  106.29
  -1  -8   3 5019.20   95.89
  -1   8   2   15.50    4.40
   1   8  -2    6.10    4.20
  -1   8   2   13.80    2.80
   1   8  -2    9.50    3.20
   1   8  -2   12.10    1.60
   1   8  -2   10.20    2.50
  -1   8   2    5.00    5.10
  -1  -8   2   12.90    5.00
   1  -8  -2   10.70    4.10
  -1  -8   2    7.60    5.50
  -1  -8   2   12.60    2.80
  -1  -8   2   12.10    1.70
   1  -8  -2   14.80    2.80
   1  -8  -2    6.80    5.50
   1   8  -1 1109.49   38.20
  -1   8   1 1070.19   41.80
  -1   8   1 1065.99   32.40
  -1   8   1 1068.69   27.50
   1   8  -1 1052.59   21.00
   1   8  -1 1080.69   31.60
   1   8  -1 1060.59   30.40
   1  -8  -1 1125.69   33.80
  -1  -8   1 1049.70   37.10
  -1  -8   1 1059.09   21.20
  -1  -8   1 1037.80   27.50
   1  -8  -1 1040.00   27.20
   1  -8  -1 1087.69   40.60
  -1   8   0   14.00    5.90
  -1   8   0    9.00    3.30
   1   8   0   17.80    3.20
  -1   8   0   15.20    3.30
   1   8   0   17.00    4.10
   1   8   0   12.90    5.80
  -1  -8   0   10.20    5.40
  -1  -8   0   16.60    6.70
   1  -8   0   15.30    3.00
   1  -8   0   11.20    4.70
  -1  -8   0   16.70    3.00
   1  -8   0   15.00    6.10
  -1   8  -1  682.03   25.20
   1   8   1  676.03   19.30
  -1   8  -1  687.93   14.80
   1   8   1  694.83   23.00
  -1   8  -1  694.73   20.90
   1   8   1  671.93   31.40
  -1   8  -1  681.53   29.10
  -1  -8  -1  698.73   26.80
  -1  -8  -1  690.13   19.40
   1  -8   1  718.13   25.80
  -1  -8  -1  650.43   30.80
   1  -8   1  667.33   14.90
   1  -8   1  676.03   28.80
   1  -8   1  702.33   20.80
  -1   8  -2   11.30    5.10
  -1   8  -2    9.50    1.60
   1   8   2   14.40    2.70
  -1   8  -2    8.40    2.50
   1   8   2   10.60    3.30
  -1   8  -2   11.10    4.10
   1   8   2    7.10    6.20
  -1  -8  -2   13.90    6.40
   1  -8   2   11.80    2.80
   1  -8   2    9.40    1.70
   1  -8   2    5.80    4.40
  -1  -8  -2    8.10    2.20
  -1  -8  -2   10.60    4.30
  -1  -8  -2   10.80    1.20
  -1  -8  -2    8.80    1.00
   1  -8   2   10.20    4.60
   1   8   3 5232.08   98.49
   1   8   3 5331.97  101.99
  -1   8  -3 5296.07  106.89
   1   8   3 5510.85  130.49
  -1   8  -3 5275.57  115.49
  -1   8  -3 5186.88  100.79
   1   8   3 5153.48  109.09
  -1   8  -3 5408.96  115.79
  -1  -8  -3 5348.47  130.09
   1  -8   3 5209.38  100.89
  -1  -8  -3 5301.57   98.59
   1  -8   3 5228.48  113.09
   1  -8   3 5292.47  106.39
   1  -8   3 5156.98  114.19
  -1  -8  -3 5121.59  101.89
   1   8   4    9.00    6.70
  -1   8  -4    5.90    4.20
   1   8   4    9.50    3.40
   1   8   4    7.10    1.50
  -1   8  -4    9.70    4.70
   1   8   4    5.10    1.60
  -1   8  -4   11.40    2.40
  -1   8  -4    2.30    2.00
   1  -8   4    1.00    3.50
   1  -8   4    4.90    2.20
  -1  -8  -4    4.00    5.30
  -1  -8  -4    5.40    1.50
   1  -8   4    7.30    2.10
  -1  -8  -4    5.70    1.50
   1   8   5 2476.55   51.99
   1   8   5 2459.25   61.69
   1   8   5 2678.13   82.19
  -1   8  -5 2564.44   67.89
  -1   8  -5 2528.15   58.49
   1   8   5 2635.04   50.99
  -1   8  -5 2501.35   54.39
  -1   8  -5 2528.05   62.59
  -1  -8  -5 2445.96   50.79
   1  -8   5 2571.44   62.29
  -1  -8  -5 2515.05   52.29
   1  -8   5 2562.34   65.29
   1  -8   5 2508.35   54.29
   1  -8   5 2530.65   57.79
  -1  -8  -5 2566.64   81.89
   1   8   6    6.90    7.60
  -1   8  -6   -1.00    1.40
  -1   8  -6    0.90    3.90
   1   8   6   -0.40    0.80
   1   8   6    2.30    2.60
  -1   8  -6    0.90    4.30
   1   8   6   -1.40    1.30
  -1   8  -6   -1.20    1.40
   1  -8   6   -1.70    3.20
  -1  -8  -6    3.10    6.80
   1  -8   6    0.00    1.40
  -1  -8  -6   -0.90    0.80
  -1  -8  -6   -1.20    1.20
   1  -8   6    0.00    2.00
   1  -8   6   -3.50    4.70
   1   8   7 1198.58   38.40
  -1   8  -7 1149.89   31.30
   1   8   7 1110.29   29.10
  -1   8  -7 1206.88   33.90
   1   8   7 1159.88   52.79
   1   8   7 1224.08   24.00
  -1   8  -7 1131.69   42.70
  -1   8  -7 1198.08   35.30
   1  -8   7 1130.49   31.10
   1  -8   7 1118.39   32.50
   1  -8   7 1117.89   35.30
  -1  -8  -7 1127.99   31.10
  -1  -8  -7 1135.19   53.79
   1  -8   7 1139.09   40.10
  -1  -8  -7 1138.89   23.80
   1   8   8   -0.90    1.80
  -1   8  -8   -1.30    3.90
   1   8   8   -0.80   10.70
  -1   8  -8   -2.40    4.10
  -1   8  -8   -1.90    2.10
  -1   8  -8    0.60    1.90
   1  -8   8    6.50    4.40
   1  -8   8   -1.90    2.00
  -1  -8  -8    0.10    1.70
  -1  -8  -8    3.80    8.00
   1  -8   8    0.00    2.30
  -1   8  -9   54.39    6.50
  -1   8  -9   43.00   10.10
  -1   8  -9   55.49    8.60
   1   8   9   84.09   14.60
   1   8   9   46.50    6.20
  -1   8  -9   67.49    7.20
  -1   8  -9   66.39    9.50
   1   8   9   68.29   18.50
  -1  -8  -9   65.19    6.10
   1  -8   9   64.99    7.10
   1  -8   9   56.39    6.80
  -1  -8  -9   71.19   17.10
   1   8  10   45.60   16.10
  -1   8 -10   51.29   13.40
  -1   8 -10   39.30    8.70
  -1   8 -10   48.60    7.30
   1   8  10   59.79    7.40
  -1   8 -10   41.00    6.70
   1   8  10   39.50   10.60
  -1   8 -10   34.70    7.40
   1  -8  10   40.40    6.30
  -1  -8 -10   40.90   15.40
  -1  -8 -10   51.59    7.20
   1  -8  10   39.50    7.70
  -1   8 -11  764.72   27.20
   1   8  11  634.24   24.10
  -1   8 -11  709.63   28.70
  -1   8 -11  734.93   50.59
  -1   8 -11  666.63   26.00
   1   8  11  741.93   37.50
  -1   8 -11  697.63   26.20
   1  -8  11  692.83   26.10
  -1  -8 -11  755.82   49.40
   1  -8  11  665.93   25.10
  -1  -8 -11  710.93   25.20
  -1   8 -12   -3.90    3.10
   1   8  12    1.20    3.70
  -1   8 -12   -1.10    3.20
  -1   8 -12   -5.30    8.50
  -1   8 -12   -3.20    7.20
  -1   8 -12   -3.70    6.40
   1   8  12    3.60    9.70
  -1  -8 -12   -3.30    3.10
  -1  -8 -12   -0.10   14.60
  -1   8 -13  871.61   31.40
  -1   8 -13  895.91   47.80
  -1   8 -13  857.61   31.30
  -1   8 -13  913.81   33.10
  -1  -8 -13  836.72   30.60
  -1  -8 -13  900.21   58.29
  -1   8 -14   -6.50    8.40
   1   8  14   -4.00   13.80
  -1   8 -14   19.20    7.10
  -1   8 -14   -2.70    8.60
  -1   8 -14    4.50    4.30
  -1   8 -14   -6.10   12.20
  -1  -8 -14    3.60    4.30
  -1  -8 -14   14.00   16.90
  -1   8 -15  459.55   22.70
  -1   8 -15  493.45   25.30
  -1   8 -15  500.55   40.60
  -1  -8 -15  454.25   23.30
  -1  -8 -15  537.85   50.49
  -1   8 -16   13.60   14.00
  -1   8 -16    4.20    5.30
  -1   8 -16   11.10   11.80
  -1   8 -16   -2.70   12.30
  -1   8 -16   -1.10    6.40
  -1  -8 -16  -13.70   24.60
  -1  -8 -16    1.40    6.20
  -1   8 -17    2.40   11.00
  -1   8 -17    4.20   17.50
  -1   8 -17    1.10    5.50
  -1  -8 -17  -23.70   26.30
  -1  -8 -17   -6.50    6.50
  -1   8 -18  -11.20   25.00
  -1   8 -18   -0.20    6.80
  -1   9  18    3.00   15.10
   1   9 -18   41.20   23.10
   1   9 -18   23.00    8.40
   1  -9 -18   14.90    7.70
   1   9 -17    6.30    6.40
   1   9 -17   10.10    7.80
   1   9 -17  -14.30   15.70
  -1   9  17    3.00   11.40
   1  -9 -17    6.90    8.00
   1  -9 -17    3.60   25.90
  -1   9  16   21.00   15.60
   1   9 -16   19.30   14.00
   1   9 -16   -6.20    4.90
   1  -9 -16  -21.10   37.10
   1  -9 -16   -3.00    5.40
   1   9 -15   10.30    6.40
   1   9 -15   24.60    6.60
  -1   9  15   11.10   10.00
   1   9 -15    9.60   14.40
  -1   9  15    6.00   18.70
   1  -9 -15   17.00    5.90
   1  -9 -15   15.30   21.70
   1   9 -14  131.59   12.20
  -1   9  14  158.38   20.30
   1   9 -14  142.49   12.70
   1   9 -14  162.48   26.50
   1  -9 -14  130.19   30.00
   1  -9 -14  150.38   12.10
  -1   9  13   69.99   14.20
   1   9 -13   66.49   14.60
  -1   9  13   88.49   10.20
   1   9 -13   80.39   10.50
   1   9 -13  106.59   10.60
   1  -9 -13   51.79   19.30
   1  -9 -13   85.19    8.90
   1   9 -12  440.66   21.00
  -1   9  12  413.06   19.10
  -1   9  12  456.45   33.30
   1   9 -12  456.35   20.60
  -1   9  12  458.35   28.20
   1   9 -12  441.16   31.40
   1  -9 -12  437.86   38.80
   1  -9 -12  443.86   18.90
   1   9 -11  102.79    9.60
  -1   9  11   81.59   12.70
  -1   9  11  104.79    9.00
  -1   9  11  103.79    3.70
  -1   9  11  103.49    3.80
   1   9 -11   79.89   14.10
   1   9 -11  105.09   10.10
  -1   9  11  131.29   20.50
  -1  -9  11  104.69    9.80
   1  -9 -11   81.09   20.00
   1  -9 -11  103.49    8.30
  -1   9  10  225.48   29.70
   1   9 -10  237.28   14.20
   1   9 -10  248.28   13.70
  -1   9  10  253.47   19.10
  -1   9  10  249.97   12.50
  -1   9  10  244.08    7.80
   1   9 -10  268.97   22.40
  -1  -9  10  262.37   14.00
   1  -9 -10  242.98   12.10
  -1  -9  10  251.07   14.40
  -1   9   9    4.60    4.60
   1   9  -9   17.90    8.40
  -1   9   9    9.70    3.50
   1   9  -9   11.30    4.00
  -1   9   9   16.00    2.50
  -1   9   9   10.00   11.70
   1   9  -9   12.70    4.10
   1  -9  -9   10.30    3.20
   1  -9  -9    9.30    9.40
   1  -9  -9   15.40    2.50
  -1  -9   9    8.30    3.50
  -1  -9   9   11.70    4.10
   1   9  -8   -2.10    4.60
  -1   9   8    6.50   10.60
   1   9  -8    2.10    2.10
   1   9  -8    0.60    2.30
  -1   9   8    3.10    4.20
  -1   9   8    1.30    2.10
  -1   9   8    0.50    1.20
  -1  -9   8    1.40    2.20
  -1  -9   8    4.80    2.80
   1  -9  -8   -1.60    8.50
   1  -9  -8    3.50    2.00
   1  -9  -8    1.50    1.40
   1   9  -7   64.99    5.90
  -1   9   7   54.09    4.20
  -1   9   7   46.80    9.10
  -1   9   7   51.69    4.60
   1   9  -7   55.29    5.70
   1   9  -7   56.89    6.70
  -1   9   7   43.70   13.20
   1   9  -7   50.99    9.30
  -1  -9   7   48.70    6.20
  -1  -9   7   47.80    6.80
   1  -9  -7   33.60   12.00
   1  -9  -7   51.29    4.00
   1  -9  -7   50.19    4.40
  -1   9   6    6.60    2.00
  -1   9   6    8.40    8.30
  -1   9   6   12.90    2.50
   1   9  -6    7.40    3.20
   1   9  -6    5.20    3.70
   1   9  -6    5.90    4.20
  -1   9   6    6.10    4.10
  -1  -9   6    5.60    2.20
  -1  -9   6    6.70    2.80
   1  -9  -6    0.50    6.60
   1  -9  -6    7.00    1.90
  -1  -9   6    7.80    3.40
   1  -9  -6    6.90    1.80
   1   9  -5   62.79    7.70
   1   9  -5   71.69    5.10
   1   9  -5   85.19    7.20
  -1   9   5   46.70   12.40
  -1   9   5   65.59    4.90
  -1   9   5   72.99    4.10
   1   9  -5   73.19   11.40
  -1   9   5   72.29    8.50
   1  -9  -5   89.89   16.80
   1  -9  -5   70.69    3.90
  -1  -9   5   70.39    5.00
  -1  -9   5   65.79    6.50
  -1  -9   5   57.09    6.90
   1  -9  -5   64.79    4.80
  -1   9   4  830.52   41.30
  -1   9   4  820.02   18.00
   1   9  -4  834.02   20.60
  -1   9   4  803.42   28.80
   1   9  -4  836.92   29.00
  -1   9   4  829.72   22.30
   1   9  -4  860.81   30.70
   1   9  -4  826.52   25.40
   1  -9  -4  820.72   22.20
   1  -9  -4  807.42   17.70
  -1  -9   4  818.22   25.20
   1  -9  -4  870.31   41.80
  -1  -9   4  800.52   27.90
  -1  -9   4  819.92   20.70
  -1  -9   4  796.72   28.90
   1   9  -3   28.50    6.20
  -1   9   3   24.40    3.70
   1   9  -3   21.60    2.20
  -1   9   3   24.10    5.80
   1   9  -3   23.10    4.30
  -1   9   3   26.90    9.60
   1   9  -3   16.90    5.90
   1  -9  -3   16.70    1.00
   1  -9  -3    9.50    6.10
  -1  -9   3   20.30    2.60
   1  -9  -3    5.50    4.20
  -1  -9   3   19.50    5.30
  -1  -9   3   12.00    5.20
   1  -9  -3   18.70    3.60
  -1  -9   3   22.50    4.20
  -1   9   2  651.33   33.70
   1   9  -2  657.03   20.90
  -1   9   2  666.43   25.00
   1   9  -2  639.84   24.40
   1   9  -2  652.33   14.70
   1   9  -2  654.63   28.30
  -1   9   2  645.54   19.80
  -1  -9   2  672.33   28.20
   1  -9  -2  671.43   33.80
   1  -9  -2  703.43   26.90
  -1  -9   2  658.93   15.00
  -1  -9   2  641.04   20.60
   1  -9  -2  640.94   19.60
  -1  -9   2  636.34   24.10
   1   9  -1   -0.40    4.30
   1   9  -1    0.70    1.40
  -1   9   1    0.20    1.00
  -1   9   1   -1.40    4.90
  -1   9   1   -0.40    2.20
   1   9  -1   -0.20    2.50
  -1  -9   1   -1.00    3.80
   1  -9  -1    3.30    4.20
  -1  -9   1   -0.80    1.40
  -1  -9   1    1.50    0.50
   1  -9  -1   -4.90    3.90
   1  -9  -1   -0.20    1.20
  -1  -9   1    1.50    3.30
  -1   9   0   29.40   10.00
  -1   9   0   21.70    4.00
   1   9   0   20.70    8.20
  -1   9   0   15.80    4.40
   1   9   0   22.20    4.80
   1   9   0   21.20    3.50
  -1  -9   0   23.90    5.40
  -1  -9   0   26.60    7.70
   1  -9   0   16.20    5.30
   1  -9   0   28.00    4.70
  -1  -9   0   29.20    4.30
  -1   9  -1    9.40    5.20
  -1   9  -1    5.10    3.60
   1   9   1    4.90    5.50
   1   9   1    4.30    2.70
  -1   9  -1   10.50    3.10
  -1   9  -1    6.90    1.00
  -1  -9  -1   10.70    4.70
   1  -9   1    0.30    4.40
   1  -9   1    7.10    1.10
  -1  -9  -1    7.50    5.50
   1  -9   1    4.50    4.10
   1  -9   1    5.50    2.30
  -1  -9  -1    2.90    1.90
  -1   9  -2  220.88   11.10
   1   9   2  211.28   19.50
  -1   9  -2  215.08   16.30
  -1   9  -2  190.98   13.60
  -1   9  -2  211.08    7.00
   1   9   2  220.38   12.50
   1   9   2  207.98    9.30
   1  -9   2  213.88   14.60
  -1  -9  -2  226.88   19.50
   1  -9   2  209.18    7.10
   1  -9   2  223.38   16.40
  -1  -9  -2  210.78   13.30
   1  -9   2  214.88   10.90
  -1  -9  -2  204.38    9.30
   1   9   3    4.00    2.80
  -1   9  -3    6.60    4.20
  -1   9  -3    5.50    2.70
  -1   9  -3    5.40    5.00
  -1   9  -3    7.40    1.70
   1   9   3    5.70    1.80
   1   9   3    5.40    7.10
   1   9   3    6.90    1.20
   1  -9   3    6.40    1.60
   1  -9   3    6.60    2.50
  -1  -9  -3   11.70    6.40
  -1  -9  -3    5.20    2.00
  -1  -9  -3    5.30    1.10
   1  -9   3    7.50    4.90
   1  -9   3    7.60    4.90
  -1   9  -4  747.23   20.20
   1   9   4  752.82   26.50
  -1   9  -4  763.72   24.80
  -1   9  -4  756.92   30.00
   1   9   4  759.02   20.10
  -1   9  -4  771.02   30.80
   1   9   4  814.02   40.50
   1   9   4  747.73   17.90
   1  -9   4  769.62   24.20
  -1  -9  -4  804.92   40.50
   1  -9   4  795.72   20.60
  -1  -9  -4  757.52   18.10
   1  -9   4  753.22   29.40
   1  -9   4  765.52   29.50
  -1  -9  -4  763.22   20.30
  -1   9  -5   23.20    6.50
   1   9   5   28.30    2.90
  -1   9  -5   23.50    3.90
   1   9   5   30.80    3.10
   1   9   5   22.60    5.90
  -1   9  -5   19.20    6.20
   1   9   5   11.40    9.20
  -1   9  -5   24.80    4.70
  -1  -9  -5   27.60    9.90
   1  -9   5   20.50    4.20
   1  -9   5   20.50    5.80
   1  -9   5   24.10    3.60
  -1  -9  -5   25.60    2.90
  -1  -9  -5   26.80    2.90
   1  -9   5   25.80    7.00
  -1   9  -6  441.66   24.40
   1   9   6  421.26   12.10
   1   9   6  429.76   20.40
   1   9   6  415.96   13.40
  -1   9  -6  400.56   17.30
  -1   9  -6  400.56   15.00
   1   9   6  385.46   29.90
  -1   9  -6  406.96   19.70
   1  -9   6  414.46   26.00
  -1  -9  -6  430.06   13.70
  -1  -9  -6  404.26   11.90
   1  -9   6  409.56   15.00
  -1  -9  -6  439.66   32.30
   1  -9   6  405.66   17.10
   1  -9   6  401.36   19.80
  -1   9  -7   50.59    6.40
  -1   9  -7   58.59    5.80
  -1   9  -7   38.00    7.50
   1   9   7   44.00   10.60
  -1   9  -7   55.09   10.60
   1   9   7   31.70   12.30
   1   9   7   57.79    3.40
   1  -9   7   39.10    5.50
  -1  -9  -7   54.69   14.40
  -1  -9  -7   49.40    3.20
   1  -9   7   50.89    6.20
   1  -9   7   35.20    7.20
  -1   9  -8  125.19   15.30
  -1   9  -8  131.39   10.00
  -1   9  -8  122.39   11.40
  -1   9  -8  140.89    9.50
   1   9   8  127.69    4.40
   1   9   8  146.99    8.60
   1   9   8  117.19   21.30
   1   9   8  143.69   13.20
  -1  -9  -8  132.69    8.20
  -1  -9  -8  134.39    4.50
   1  -9   8  127.29   11.70
   1  -9   8  132.49   11.80
  -1  -9  -8  103.89   20.70
   1  -9   8  132.29    9.10
  -1   9  -9   19.80    4.70
  -1   9  -9   16.20    4.90
  -1   9  -9   21.10    6.50
   1   9   9    6.30    6.30
   1   9   9   23.70    4.40
  -1   9  -9   18.80    6.60
   1   9   9   19.00   15.40
  -1   9  -9   29.30   10.20
   1   9   9   20.80    6.90
  -1  -9  -9   14.10   10.90
   1  -9   9   21.80    4.80
   1  -9   9   16.40    4.50
  -1  -9  -9   25.00    4.60
   1   9  10  104.59   16.60
   1   9  10  105.49   13.80
  -1   9 -10  116.79    9.90
  -1   9 -10   95.49   15.70
  -1   9 -10  120.79   11.90
  -1   9 -10  121.89   12.00
   1   9  10  113.49    8.90
  -1   9 -10  126.39   10.40
  -1  -9 -10  108.79    8.50
  -1  -9 -10   91.99   21.40
   1  -9  10  104.19    9.70
   1  -9  10  100.79    9.40
   1   9  11   28.80    8.80
  -1   9 -11   24.50    5.70
   1   9  11   35.80   11.50
  -1   9 -11   35.70    7.30
  -1   9 -11   14.10    9.30
  -1   9 -11   33.70    7.80
   1   9  11   38.70    6.60
  -1   9 -11   25.50    6.80
   1  -9  11   29.80    6.30
  -1  -9 -11   57.29    7.80
  -1  -9 -11   40.20   17.50
  -1   9 -12   24.70    5.90
  -1   9 -12   26.20    8.50
  -1   9 -12   32.40    6.80
   1   9  12   25.90    6.70
   1   9  12   33.00    9.90
  -1   9 -12   37.10   15.00
  -1   9 -12   26.20    7.50
   1   9  12   10.60   11.20
  -1  -9 -12   27.70   16.10
  -1  -9 -12   10.70    4.30
  -1   9 -13   70.89   18.00
  -1   9 -13   76.49    9.50
  -1   9 -13   71.39    9.90
  -1  -9 -13   68.49    9.10
  -1  -9 -13   66.99   21.90
  -1   9 -14  110.89   12.40
  -1   9 -14  125.89   24.80
  -1   9 -14  110.39   11.30
  -1  -9 -14  113.29   11.40
  -1  -9 -14   83.39   24.70
  -1   9 -15   95.79   11.60
  -1   9 -15   80.89   12.40
  -1   9 -15   48.30   16.00
  -1  -9 -15  107.09   11.80
  -1  -9 -15  122.39   46.80
  -1   9 -16   22.20    7.80
  -1   9 -16    2.50   18.00
  -1   9 -16    2.40   10.80
  -1   9 -16   15.00    7.00
  -1  -9 -16   14.10   24.20
  -1  -9 -16   13.30    7.30
  -1   9 -17   -5.10   20.50
  -1   9 -17   10.90    8.00
  -1  -9 -17   -8.00    6.60
  -1   9 -18    4.80    7.70
  -1   9 -18   -1.00   22.20
   1  10 -18   35.90   24.00
  -1  10  18   25.70   17.20
   1  10 -18   20.80    9.10
   1 -10 -18   29.80    9.70
   1  10 -17   36.20    9.50
   1  10 -17   23.50   20.50
   1  10 -17   28.80    9.30
  -1  10  17   43.50   15.70
  -1  10  16   16.30   11.80
   1  10 -16  -19.00   14.80
   1  10 -16    3.70    7.00
   1  10 -16   -3.90    5.60
   1 -10 -16    1.10    5.90
   1 -10 -16  -16.00   23.50
   1  10 -15   33.90   16.30
   1  10 -15   21.40    6.90
   1  10 -15   16.60    7.50
  -1  10  15   17.60   11.00
   1 -10 -15   25.70    7.20
   1 -10 -15   15.50   31.10
  -1  10  14  -12.60   17.20
   1  10 -14   23.30   12.50
   1  10 -14   12.00    6.30
  -1  10  14   11.90    9.40
   1  10 -14    9.90    5.70
   1 -10 -14   16.90    5.70
   1 -10 -14   28.20   20.50
   1  10 -13  338.77   19.40
  -1  10  13  354.66   17.70
  -1  10  13  385.06   27.00
   1  10 -13  341.77   30.60
   1  10 -13  345.87   18.90
   1 -10 -13  321.47   16.50
   1 -10 -13  344.07   39.30
   1  10 -12   99.59   18.80
   1  10 -12   93.89    9.50
  -1  10  12   77.59   14.30
  -1  10  12   40.20   16.80
  -1  10  12  105.19   12.70
   1  10 -12  109.29   10.70
   1 -10 -12   77.99   21.50
   1 -10 -12  102.59    8.80
   1  10 -11  640.84   26.10
  -1  10  11  686.73   33.10
  -1  10  11  659.83   14.80
   1  10 -11  624.84   24.40
  -1  10  11  642.04   22.60
   1  10 -11  617.04   36.60
  -1  10  11  702.63   14.90
   1 -10 -11  766.02   50.99
  -1 -10  11  621.84   24.40
   1 -10 -11  677.83   22.90
  -1  10  10   50.79   10.20
   1  10 -10   63.19   13.90
   1  10 -10   46.30    6.90
   1  10 -10   68.49    8.40
  -1  10  10   56.89    3.70
  -1  10  10   60.19    6.60
  -1 -10  10   71.39    8.70
   1 -10 -10   48.80    5.30
   1 -10 -10   45.60   15.80
   1 -10 -10   57.89    4.00
   1  10  -9  195.08   18.70
  -1  10   9  183.08    7.60
   1  10  -9  182.58   11.10
  -1  10   9  173.08   15.70
  -1  10   9  175.28    9.80
   1  10  -9  193.18   12.80
   1 -10  -9  176.58    7.50
  -1 -10   9  188.38   11.30
  -1 -10   9  195.88   12.90
   1 -10  -9  196.48    9.90
   1  10  -8   27.60    4.00
  -1  10   8   27.80    3.80
  -1  10   8   31.80    8.20
   1  10  -8   19.50    4.90
   1  10  -8   29.00    5.00
  -1  10   8   15.00   13.00
   1  10  -8   21.30    3.10
   1  10  -8   27.20    9.00
  -1  10   8   29.00    4.40
   1 -10  -8   33.40   13.80
  -1 -10   8   30.50    5.80
   1 -10  -8   27.40    3.30
  -1 -10   8   23.30    4.20
   1 -10  -8   32.20    4.50
   1  10  -7  155.38   11.10
   1  10  -7  178.78   10.40
  -1  10   7  182.28    8.20
   1  10  -7  162.88   19.30
   1  10  -7  176.18    9.40
  -1  10   7  170.68    8.00
  -1  10   7  207.48   25.00
  -1 -10   7  165.08    9.40
   1 -10  -7  177.78    8.10
   1 -10  -7  176.78    8.00
  -1 -10   7  169.98    9.90
  -1 -10   7  186.18   13.10
   1 -10  -7  198.18   23.90
   1  10  -6    2.60    4.20
  -1  10   6    3.00    1.60
   1  10  -6    3.50    4.10
  -1  10   6   12.10   10.60
   1  10  -6    3.60    2.40
  -1  10   6    1.80    1.40
  -1  10   6    3.20    3.80
   1  10  -6    2.30    2.10
  -1 -10   6    2.00    3.50
   1 -10  -6    2.30    1.30
  -1 -10   6    1.10    2.30
   1 -10  -6    3.30    1.30
   1 -10  -6    4.80    8.30
  -1 -10   6    1.10    1.90
  -1  10   5 1073.79   23.50
  -1  10   5 1088.69   36.40
  -1  10   5 1098.69   52.29
   1  10  -5 1136.29   39.10
   1  10  -5 1052.79   31.80
   1  10  -5 1114.39   26.60
  -1  10   5 1094.79   27.90
   1  10  -5 1044.80   34.10
   1 -10  -5 1029.60   23.20
  -1 -10   5 1049.00   33.10
  -1 -10   5 1037.90   31.20
  -1 -10   5 1079.99   26.80
   1 -10  -5 1041.90   50.39
  -1  10   4   21.10    6.00
  -1  10   4   30.70    3.80
   1  10  -4   26.90    5.10
  -1  10   4   17.40    9.90
   1  10  -4   24.80    6.60
   1  10  -4   25.60    2.80
   1  10  -4   17.90    6.60
  -1  10   4   26.80    1.80
  -1 -10   4   23.10    4.40
   1 -10  -4   26.30    1.80
  -1 -10   4   22.40    5.60
   1 -10  -4   27.10    3.90
   1 -10  -4   35.80   11.00
  -1 -10   4   24.90    3.30
   1  10  -3 1557.94   46.00
  -1  10   3 1568.74   45.40
  -1  10   3 1584.54   59.89
   1  10  -3 1577.64   32.70
  -1  10   3 1531.05   37.50
   1  10  -3 1573.94   48.90
   1  10  -3 1547.05   40.30
   1 -10  -3 1551.44   37.70
  -1 -10   3 1540.55   39.90
  -1 -10   3 1592.74   48.30
   1 -10  -3 1642.34   59.99
  -1 -10   3 1531.65   32.90
  -1  10   2   29.40    6.40
  -1  10   2   39.10    4.50
   1  10  -2   34.10    5.00
  -1  10   2   37.40   11.20
   1  10  -2   28.40    8.70
   1  10  -2   32.10    2.10
   1  10  -2   24.70    5.30
  -1 -10   2   36.10    8.90
  -1 -10   2   34.90    2.30
   1 -10  -2   14.80    7.70
  -1 -10   2   30.40    4.80
   1 -10  -2   33.90    4.20
   1 -10  -2   24.80    7.30
  -1  10   1 1137.29   30.90
   1  10  -1 1204.88   36.30
  -1  10   1 1209.98   48.10
  -1  10   1 1087.09   36.50
   1  10  -1 1175.98   31.60
   1 -10  -1 1145.79   31.00
   1 -10  -1 1198.08   38.50
   1 -10  -1 1183.48   46.80
  -1 -10   1 1139.99   31.20
  -1  10   0   13.50    8.40
   1  10   0   16.40    5.10
  -1  10   0   19.00    4.20
   1  10   0   19.60    8.80
  -1  10   0   18.00    4.80
   1  10   0   15.80    3.40
   1 -10   0   17.10    6.30
   1 -10   0   17.90    4.10
  -1 -10   0    7.80    5.60
  -1 -10   0   14.30    3.20
   1 -10   0    8.30    6.50
  -1  10  -1    1.70    1.80
  -1  10  -1    3.30    0.70
   1  10   1    3.40    2.90
  -1  10  -1   10.60    7.30
   1  10   1    1.30    1.50
  -1  10  -1    1.90    3.20
  -1  10  -1    3.10    0.60
   1  10   1    6.00    7.00
  -1 -10  -1    3.60    1.90
   1 -10   1    4.60    5.00
   1 -10   1    2.30    2.00
   1 -10   1    3.50    5.20
  -1 -10  -1   -2.30    4.90
   1  10   2   10.90    4.10
   1  10   2    9.10    8.20
  -1  10  -2   15.20    3.70
  -1  10  -2   14.50    5.50
   1  10   2   10.90    2.60
  -1  10  -2   10.20    1.60
  -1  10  -2    2.40    6.50
   1 -10   2    9.00    1.70
   1 -10   2   14.20    5.90
   1 -10   2    8.20    2.70
  -1 -10  -2    8.50    2.60
  -1 -10  -2    7.60    6.50
   1 -10   2    7.30    5.20
   1  10   3  699.03   20.00
  -1  10  -3  683.33   30.30
   1  10   3  662.43   24.80
   1  10   3  674.73   37.50
  -1  10  -3  655.63   28.20
  -1  10  -3  648.04   22.70
  -1  10  -3  675.73   17.10
  -1 -10  -3  690.43   37.50
   1 -10   3  654.53   17.00
  -1 -10  -3  665.93   13.80
   1 -10   3  650.63   22.30
   1 -10   3  678.73   28.30
  -1 -10  -3  661.83   13.80
   1 -10   3  659.93   29.50
   1  10   4    7.40    3.60
   1  10   4    9.30    8.60
   1  10   4    7.70    1.50
  -1  10  -4    6.70    4.80
  -1  10  -4    3.70    5.10
   1  10   4    9.00    2.30
  -1  10  -4    7.20    3.20
  -1  10  -4    6.40    2.10
  -1 -10  -4    8.00    1.60
   1 -10   4    7.10    3.10
  -1 -10  -4   14.20    8.70
   1 -10   4    7.30    5.20
  -1 -10  -4    7.40    2.30
   1 -10   4    6.70    2.00
   1  10   5  451.75   12.70
   1  10   5  406.06   31.20
  -1  10  -5  457.45   15.00
   1  10   5  442.56   13.90
  -1  10  -5  415.46   22.40
  -1  10  -5  432.26   24.30
  -1  10  -5  427.96   18.50
   1  10   5  453.75   20.90
   1 -10   5  449.76   22.40
  -1 -10  -5  455.95   12.90
   1 -10   5  442.36   14.90
   1 -10   5  432.46   18.00
  -1 -10  -5  437.66   14.00
  -1 -10  -5  468.95   32.80
  -1  10  -6   16.20    6.70
   1  10   6   18.50    3.00
  -1  10  -6   13.60    5.70
   1  10   6   14.20    5.00
   1  10   6   20.40    3.00
  -1  10  -6   13.60    3.90
   1  10   6    1.70    9.80
  -1  10  -6   20.50    3.90
  -1 -10  -6    8.90    9.80
   1 -10   6    9.90    5.00
  -1 -10  -6   20.80    3.20
  -1 -10  -6   21.20    2.90
   1 -10   6   12.80    3.70
   1 -10   6   19.70    3.80
  -1  10  -7  349.37   23.50
   1  10   7  342.77   12.80
   1  10   7  336.37   19.30
  -1  10  -7  348.87   18.80
  -1  10  -7  330.07   16.60
   1  10   7  338.47   31.40
   1  10   7  339.77   10.50
  -1  10  -7  341.07   14.40
   1 -10   7  355.46   16.60
  -1 -10  -7  332.67   12.60
   1 -10   7  343.17   14.40
  -1 -10  -7  348.47   31.40
  -1 -10  -7  329.37   10.40
   1 -10   7  347.37   18.90
  -1  10  -8   -1.80    1.90
   1  10   8   -1.30    2.00
   1  10   8    0.40    1.10
   1  10   8   -0.60   12.40
  -1  10  -8    2.60    2.70
  -1  10  -8   -2.60    5.50
   1  10   8    4.10    4.10
   1 -10   8   -1.00    2.40
   1 -10   8    2.20    4.90
   1 -10   8   -3.70    2.60
  -1 -10  -8    0.00    9.60
  -1 -10  -8    1.70    2.10
  -1 -10  -8   -1.00    1.00
  -1  10  -9   30.40    7.20
   1  10   9   31.10    9.00
  -1  10  -9   22.80    8.40
  -1  10  -9   26.40    5.50
   1  10   9   27.30    4.90
   1 -10   9   38.10    6.10
  -1 -10  -9   31.40    4.90
  -1 -10  -9   23.80   15.30
   1 -10   9   33.30    6.20
  -1  10 -10   12.30    6.10
   1  10  10   14.40    7.30
  -1  10 -10   11.90    9.10
  -1  10 -10   10.80    3.90
   1  10  10    6.70    3.90
  -1  10 -10   11.50    6.40
   1  10  10    9.40    8.20
  -1  10 -10    5.80    4.00
   1 -10  10   10.50    3.80
  -1 -10 -10   10.60    3.80
  -1 -10 -10   23.40   14.20
  -1  10 -11  449.06   21.50
  -1  10 -11  452.45   20.30
  -1  10 -11  466.95   19.90
  -1  10 -11  422.56   31.60
   1  10  11  436.26   26.30
   1  10  11  461.15   19.10
  -1 -10 -11  447.16   19.00
  -1 -10 -11  435.76   40.90
   1 -10  11  465.75   21.00
  -1  10 -12   37.20   14.10
   1  10  12   -1.70   11.50
   1  10  12   27.70    6.40
  -1  10 -12   31.40    6.90
  -1  10 -12   34.00    6.80
   1  10  12   32.50    9.60
  -1 -10 -12   19.20    4.90
  -1 -10 -12   18.80   17.70
   1  10  13  480.85   30.40
  -1  10 -13  382.96   33.40
  -1  10 -13  374.36   20.40
  -1  10 -13  398.26   21.10
  -1 -10 -13  387.26   19.20
  -1 -10 -13  416.66   44.30
  -1  10 -14   19.30    6.60
   1  10  14   16.40   10.40
   1  10  14   -4.60   17.10
  -1  10 -14   27.10    7.20
  -1  10 -14   38.00   14.80
  -1 -10 -14   26.10    6.30
  -1 -10 -14    0.50   20.00
  -1  10 -15  247.18   35.90
   1  10  15  212.28   25.10
  -1  10 -15  200.98   17.20
  -1  10 -15  218.38   17.30
  -1 -10 -15  219.08   16.10
  -1 -10 -15  214.08   40.90
   1  10  16   -4.70   12.00
  -1  10 -16    6.50   17.50
  -1  10 -16   11.40    8.10
  -1 -10 -16   13.40   25.60
  -1 -10 -16   -3.40    6.30
  -1  10 -17   -3.90   21.20
   1  10  17   23.60   15.50
  -1  10 -17    4.70    7.50
  -1 -10 -17    3.80    7.40
   1  11 -17   -4.30    6.50
  -1  11  17  -27.60   12.40
   1  11 -17    3.10   18.30
   1  11 -16   16.90   16.60
  -1  11  16    4.10   11.50
   1  11 -16   -7.00    7.10
   1  11 -16    2.90    6.60
   1 -11 -16   -1.90    5.30
   1 -11 -16   35.50   27.90
   1  11 -15   16.10    7.00
   1  11 -15   14.30    7.40
   1  11 -15   13.80   12.90
  -1  11  15   22.40   11.90
   1 -11 -15   37.00   24.30
   1 -11 -15   17.20    6.60
   1  11 -14  134.59   25.70
  -1  11  14  100.39   16.00
   1  11 -14  128.49   13.20
   1  11 -14  120.29   12.50
   1 -11 -14  122.89   30.30
   1 -11 -14  113.19   11.00
  -1  11  13   59.49    8.40
   1  11 -13   88.49   10.70
   1  11 -13   68.39    9.60
  -1  11  13   10.60   15.60
  -1  11  13   64.49   14.10
   1  11 -13   65.39   17.20
   1 -11 -13   60.79   22.50
   1 -11 -13   68.29    9.00
  -1  11  12  765.52   38.10
   1  11 -12  743.33   27.90
   1  11 -12  800.02   44.30
   1  11 -12  767.22   30.90
   1 -11 -12  759.52   25.90
   1 -11 -12  864.01   57.89
   1  11 -11   23.20   10.80
   1  11 -11   16.20    4.90
   1  11 -11    7.30    3.60
  -1  11  11   11.60    4.30
  -1  11  11   16.90    8.00
  -1  11  11   13.30    2.10
  -1 -11  11   13.00    4.30
   1 -11 -11    9.00    3.20
   1 -11 -11   28.20   15.70
  -1  11  10  265.57   20.30
   1  11 -10  237.48   15.30
   1  11 -10  203.88   21.30
  -1  11  10  255.87    8.90
   1  11 -10  239.38   13.70
  -1  11  10  235.38   12.00
   1 -11 -10  268.57   32.20
   1 -11 -10  262.27   12.20
   1 -11 -10  247.08    9.00
  -1  11   9    0.90    1.50
   1  11  -9    0.80    7.00
   1  11  -9    4.10    3.00
   1  11  -9   -1.20    2.80
  -1  11   9    2.10    2.50
  -1  11   9   -3.00    4.80
  -1 -11   9   -2.70    2.80
   1 -11  -9    0.60    1.60
   1 -11  -9    0.30    1.80
   1 -11  -9   -5.70   10.00
  -1  11   8   91.79    6.00
  -1  11   8   89.29   11.60
   1  11  -8  105.59    6.80
   1  11  -8   91.89   14.50
   1  11  -8   92.99   14.80
  -1  11   8   92.79    9.60
   1  11  -8  100.99    7.80
  -1 -11   8  103.99    9.70
   1 -11  -8   90.29    5.90
  -1 -11   8  110.79    8.30
  -1 -11   8  102.89    7.00
   1 -11  -8   93.19    7.00
   1  11  -7   14.70    5.40
   1  11  -7   14.00    4.80
  -1  11   7   14.60   13.00
  -1  11   7    7.60    4.50
   1  11  -7   13.30    3.60
  -1  11   7   10.40    2.70
  -1  11   7   11.90    2.80
   1  11  -7   10.10    5.30
   1 -11  -7    3.10    9.60
  -1 -11   7   13.00    4.10
  -1 -11   7    9.20    3.00
   1 -11  -7    8.70    3.90
   1 -11  -7    7.50    2.20
  -1 -11   7    4.90    4.20
   1  11  -6  407.76   16.20
  -1  11   6  421.96   12.00
   1  11  -6  382.06   23.20
  -1  11   6  443.46   14.90
  -1  11   6  427.36   34.70
  -1  11   6  442.16   22.40
   1  11  -6  390.86   18.20
   1  11  -6  397.76   19.50
   1 -11  -6  394.06   14.30
   1 -11  -6  408.06   11.60
   1 -11  -6  399.26   33.00
  -1 -11   6  406.86   18.80
  -1 -11   6  403.86   14.60
  -1 -11   6  405.46   18.10
   1  11  -5   27.80    5.80
   1  11  -5   17.60    3.10
  -1  11   5   18.70    3.70
   1  11  -5   27.50    7.20
  -1  11   5   12.30    6.20
  -1  11   5   20.20   11.70
  -1  11   5   21.90    2.10
   1 -11  -5   17.40    1.80
   1 -11  -5   13.20    9.70
  -1 -11   5   11.10    4.20
  -1 -11   5   25.60    3.70
   1 -11  -5   19.30    3.60
  -1 -11   5   15.50    6.00
  -1  11   4 1072.19   36.70
   1  11  -4 1110.69   25.30
   1  11  -4 1130.99   39.10
   1  11  -4 1077.79   38.80
  -1  11   4 1069.49   51.79
  -1  11   4 1077.29   29.00
   1  11  -4 1063.09   32.20
  -1 -11   4 1107.69   32.40
   1 -11  -4 1098.19   51.09
  -1 -11   4 1064.49   37.50
   1 -11  -4 1063.69   29.00
  -1 -11   4 1105.79   25.70
  -1  11   3    0.00    1.40
   1  11  -3   -1.10    1.40
   1  11  -3    0.90    5.60
  -1  11   3    4.20    9.40
   1  11  -3    1.10    3.10
   1  11  -3    0.20    1.00
  -1  11   3   -0.90    2.90
  -1 -11   3   -1.80    4.70
   1 -11  -3    0.30    1.70
  -1 -11   3    1.70    1.10
  -1 -11   3   -0.90    2.00
   1 -11  -3    1.60    6.70
   1  11  -2 1977.30   54.19
   1  11  -2 1924.31   61.49
  -1  11   2 1955.70   54.09
  -1  11   2 1990.90   69.39
   1  11  -2 1966.50   37.20
  -1  11   2 1961.50   46.30
   1  11  -2 1953.00   48.20
  -1 -11   2 1897.11   66.79
  -1 -11   2 1961.30   37.60
   1 -11  -2 1906.91   46.20
  -1 -11   2 1902.51   47.60
   1 -11  -2 1950.90   67.79
  -1  11   1   20.30    8.80
   1  11  -1   10.30    4.20
  -1  11   1   16.50    3.80
  -1  11   1   15.20    4.50
   1  11  -1   15.90    7.80
   1  11  -1   25.60    4.90
   1 -11  -1   19.00    4.10
   1 -11  -1   13.20    8.30
  -1 -11   1   14.30    3.60
  -1 -11   1    5.40    6.10
  -1  11   0    3.90    3.20
  -1  11   0    7.90    7.70
   1  11   0   -0.90    6.50
   1  11   0    4.10    2.00
   1  11   0    7.20    4.30
  -1  11   0    4.80    2.30
  -1 -11   0   10.00    2.90
   1 -11   0    6.40    2.80
   1 -11   0    4.10    5.90
  -1 -11   0    8.80    6.30
   1  11   1    6.30    3.90
  -1  11  -1   13.20    8.40
   1  11   1    9.10    2.90
  -1  11  -1   11.10    3.30
  -1  11  -1    6.00    3.90
   1  11   1   12.90    8.80
  -1 -11  -1    0.90    5.90
   1 -11   1    7.70    3.00
  -1 -11  -1    8.20    2.50
   1 -11   1    7.20    6.30
  -1  11  -2  185.18    5.70
  -1  11  -2  173.28   14.20
   1  11   2  171.58   20.70
  -1  11  -2  166.58   17.10
   1  11   2  166.48    9.10
   1  11   2  161.38   12.10
  -1  11  -2  176.28   10.80
  -1 -11  -2  174.88    9.50
  -1 -11  -2  162.28   19.00
   1 -11   2  186.98   11.10
   1 -11   2  173.28    6.00
   1 -11   2  170.78   16.50
  -1  11  -3   -0.80    4.30
   1  11   3    2.20    2.70
   1  11   3    1.80    1.50
   1  11   3   -7.90    8.00
  -1  11  -3    0.00    2.10
  -1  11  -3   -3.00    5.90
  -1  11  -3    1.60    1.40
   1 -11   3    0.50    5.50
  -1 -11  -3    4.60    7.20
   1 -11   3    0.60    2.30
  -1 -11  -3    2.30    1.80
   1 -11   3    4.10    1.50
   1  11   4  802.32   22.40
  -1  11  -4  793.22   33.40
  -1  11  -4  763.62   33.30
  -1  11  -4  784.62   20.40
   1  11   4  753.52   42.90
   1  11   4  798.72   29.30
  -1  11  -4  723.03   26.10
  -1 -11  -4  810.22   43.90
   1 -11   4  793.32   20.60
   1 -11   4  824.52   33.10
  -1 -11  -4  791.42   22.50
   1 -11   4  808.62   26.60
  -1 -11  -4  755.12   16.70
  -1  11  -5    8.60    6.30
  -1  11  -5    5.60    5.80
  -1  11  -5    4.90    2.00
   1  11   5    5.50    3.80
   1  11   5   13.90    3.10
   1  11   5    8.30   10.20
   1  11   5    8.40    1.80
  -1  11  -5    5.80    3.20
  -1 -11  -5    8.80    1.80
  -1 -11  -5    9.80    2.70
   1 -11   5    4.60    3.00
  -1 -11  -5    6.40    8.70
   1 -11   5    8.60    5.30
   1 -11   5    7.60    2.60
   1  11   6 1286.07   59.49
  -1  11  -6 1220.98   41.00
  -1  11  -6 1185.78   36.50
   1  11   6 1204.58   28.00
   1  11   6 1217.78   40.10
  -1  11  -6 1189.68   31.20
   1  11   6 1239.98   29.10
   1 -11   6 1223.78   31.40
  -1 -11  -6 1166.58   28.80
  -1 -11  -6 1187.48   28.00
   1 -11   6 1206.88   40.60
   1 -11   6 1205.38   35.90
  -1 -11  -6 1250.97   59.29
   1  11   7   34.70    7.90
   1  11   7   35.80    3.50
  -1  11  -7   30.20    8.00
  -1  11  -7   29.90    5.90
  -1  11  -7   31.90   10.10
   1  11   7   28.10    3.90
   1  11   7   33.60   15.10
  -1  11  -7   31.20    5.20
  -1 -11  -7   27.10    3.40
   1 -11   7   28.70    5.90
   1 -11   7   25.00    7.40
   1 -11   7   27.50    4.70
  -1 -11  -7   36.80    4.60
  -1 -11  -7   22.30   12.40
  -1  11  -8  110.99   12.70
   1  11   8  109.29    5.20
  -1  11  -8   88.09   15.20
  -1  11  -8   90.49    8.00
   1  11   8  100.09   11.70
   1  11   8   98.79    7.00
  -1  11  -8  106.29   10.10
   1 -11   8  109.99    8.70
  -1 -11  -8  101.59    6.90
  -1 -11  -8   97.89    5.10
  -1 -11  -8  106.49   22.00
   1 -11   8  104.49   11.60
   1  11   9    0.30    4.50
  -1  11  -9    5.40    3.40
  -1  11  -9    3.60    3.30
   1  11   9    6.60    2.80
  -1  11  -9    9.00    6.70
  -1  11  -9    7.50    7.40
   1  11   9    9.10    1.40
  -1 -11  -9    5.20    2.80
  -1 -11  -9    8.70    1.50
   1 -11   9    2.30    3.60
  -1 -11  -9    6.80   11.90
   1 -11   9    3.70    5.90
  -1  11 -10    1.90    3.30
   1  11  10    3.90    5.60
   1  11  10    1.00    3.10
  -1  11 -10    1.20    3.30
  -1  11 -10   -3.60    5.70
  -1  11 -10   -3.80    7.00
  -1  11 -10    5.80    6.10
  -1 -11 -10   -0.70   11.90
  -1 -11 -10    1.20    2.90
   1 -11  10    3.50    4.00
  -1  11 -11    0.00    3.50
  -1  11 -11    1.40    7.30
  -1  11 -11   -0.20    5.60
   1  11  11   -3.30    5.70
   1  11  11    4.50    4.30
  -1  11 -11    6.10    6.30
  -1  11 -11   -2.10    4.30
   1  11  11    5.50   11.30
  -1 -11 -11   -9.60   14.10
  -1 -11 -11    1.00    3.10
  -1  11 -12  175.68   13.40
   1  11  12  186.38   13.00
   1  11  12  212.98   20.10
  -1  11 -12  178.38   26.60
  -1  11 -12  175.28   14.40
  -1 -11 -12  182.28   12.20
  -1 -11 -12  191.98   33.30
   1  11  13   30.70   11.70
  -1  11 -13   32.70    7.40
   1  11  13    4.70   13.90
  -1  11 -13   26.80    6.50
  -1  11 -13   40.20   15.10
  -1 -11 -13   30.40    6.80
  -1 -11 -13   21.90   20.50
  -1  11 -14  281.17   18.80
   1  11  14  310.07   26.50
  -1  11 -14  284.97   18.80
  -1  11 -14  266.37   32.00
  -1 -11 -14  311.87   48.00
  -1 -11 -14  299.27   17.10
   1  11  15   26.90   12.40
  -1  11 -15   48.50   19.90
  -1 -11 -15   32.70    8.30
  -1 -11 -15   58.39   29.00
  -1  11 -16   80.39   22.20
  -1  11 -16   84.99   13.30
   1  11  16  118.79   21.60
  -1  11 -16   98.09   14.40
  -1 -11 -16  101.99   13.00
   1  11  17   14.70   15.70
  -1  11 -17   25.20   24.00
  -1 -11 -17   17.10    8.20
   1  12 -17   21.60   19.90
  -1  12  17    4.90   14.10
   1  12 -16   -3.30    6.70
   1  12 -16   -6.20    7.50
   1  12 -16    6.60   17.50
  -1  12  16   -9.30   12.00
   1 -12 -16   -1.30    5.70
   1  12 -15    7.10    6.70
   1  12 -15    4.80   13.00
  -1  12  15   17.70   11.90
   1  12 -15    6.00    8.10
   1 -12 -15    6.90    5.10
   1 -12 -15   29.50   26.50
   1  12 -14   39.30   17.00
  -1  12  14   17.60   10.90
   1  12 -14   42.40   10.10
   1  12 -14   25.50    8.00
   1 -12 -14   46.30   24.60
   1 -12 -14   36.00    6.80
   1  12 -13  138.09   24.70
   1  12 -13  167.28   13.80
  -1  12  13  194.88   21.20
   1  12 -13  175.08   14.90
   1 -12 -13  167.28   11.70
   1 -12 -13  144.99   31.00
  -1  12  12   99.49   17.10
   1  12 -12  138.29   23.20
  -1  12  12  129.89   10.40
   1  12 -12  105.59   10.70
   1 -12 -12  117.49   27.40
   1 -12 -12  126.89    9.50
   1  12 -11   85.79   10.20
   1  12 -11  119.49   21.80
  -1  12  11   88.49   14.60
  -1  12  11   93.19    8.70
   1  12 -11   86.89    9.30
   1 -12 -11   84.89   23.70
   1 -12 -11   95.39    8.00
  -1 -12  11   93.29   10.80
   1 -12 -11   92.49    5.10
  -1  12  10   51.19    4.20
   1  12 -10   33.70    7.00
  -1  12  10   51.49    6.10
  -1  12  10   46.70   10.30
   1  12 -10   38.50   12.50
   1  12 -10   51.09    7.50
  -1 -12  10   35.20    7.00
   1 -12 -10   44.50    5.80
   1 -12 -10   43.10    4.20
   1 -12 -10   32.90   16.50
   1  12  -9  126.79   11.50
  -1  12   9  120.19    6.80
   1  12  -9  134.59   20.20
   1  12  -9  113.89    8.80
  -1  12   9  119.49    7.60
  -1  12   9  124.29   14.30
   1 -12  -9  110.19    6.70
   1 -12  -9  131.49   26.80
   1 -12  -9  112.49    7.20
  -1 -12   9  110.89    9.20
   1  12  -8   26.90    6.40
   1  12  -8   23.40    8.70
   1  12  -8   17.60    4.80
   1  12  -8   13.40    3.80
  -1  12   8   16.20    3.30
  -1  12   8   13.60    6.00
  -1 -12   8   12.60    4.30
   1 -12  -8   12.20   13.50
   1 -12  -8   19.00    3.50
   1 -12  -8   19.40    3.40
  -1 -12   8   22.50    4.70
   1  12  -7   34.40    6.80
   1  12  -7   38.00    7.30
   1  12  -7   49.60   12.50
  -1  12   7   37.70    7.90
   1  12  -7   36.20    4.90
  -1  12   7   40.20    3.80
  -1  12   7   40.30    4.60
  -1 -12   7   34.30    4.70
   1 -12  -7   34.30    4.90
   1 -12  -7   40.40    3.70
  -1 -12   7   36.00    7.00
   1 -12  -7   29.70   14.60
   1  12  -6   15.70    4.10
  -1  12   6   18.00   13.70
   1  12  -6   15.60    6.70
   1  12  -6   16.00    4.90
  -1  12   6   15.50    2.20
  -1  12   6   14.70    6.30
   1  12  -6   14.40    6.60
  -1  12   6   11.50    2.80
   1 -12  -6   16.60    2.20
  -1 -12   6   14.30    4.60
   1 -12  -6   15.20   11.40
  -1 -12   6    8.20    5.50
  -1 -12   6   14.80    3.20
   1 -12  -6   14.20    3.60
   1  12  -5  294.17   10.60
   1  12  -5  310.87   20.40
   1  12  -5  282.97   19.20
   1  12  -5  281.07   15.30
  -1  12   5  258.97   28.50
  -1  12   5  287.27   12.60
  -1  12   5  294.67   18.50
  -1 -12   5  300.47   18.50
  -1 -12   5  307.37   11.20
   1 -12  -5  311.17   28.80
   1 -12  -5  284.87   12.50
  -1 -12   5  303.87   15.50
   1  12  -4   24.80    5.50
  -1  12   4   21.40    6.20
   1  12  -4   25.00    2.70
  -1  12   4   27.00    4.50
   1  12  -4   17.90    8.30
  -1  12   4   30.20   14.30
   1  12  -4   30.50    8.30
   1 -12  -4   21.10    4.10
   1 -12  -4   30.50   11.10
  -1 -12   4   27.90    3.10
  -1 -12   4   27.00    5.80
  -1 -12   4   18.10    7.20
  -1  12   3  445.56   33.80
  -1  12   3  458.45   23.20
   1  12  -3  450.35   26.70
   1  12  -3  441.76   11.20
  -1  12   3  463.05   17.30
   1  12  -3  459.85   19.00
   1  12  -3  479.15   23.80
   1 -12  -3  459.05   32.00
   1 -12  -3  436.86   17.00
  -1 -12   3  425.06   25.00
  -1 -12   3  447.56   18.70
  -1 -12   3  445.76   11.80
  -1  12   2    9.00   10.30
   1  12  -2    6.90    2.90
   1  12  -2   10.90    4.40
  -1  12   2   12.40    3.60
   1  12  -2    8.90    8.00
   1 -12  -2    9.60    9.00
  -1 -12   2   11.60    3.40
  -1 -12   2    6.40    7.20
   1 -12  -2   14.10    3.70
  -1  12   1   50.99   13.10
   1  12  -1   69.89   10.10
  -1  12   1   76.19   11.90
   1  12  -1   61.79    6.70
   1  12  -1   47.30   12.10
  -1  12   1   56.79    6.20
  -1 -12   1   73.29    6.90
  -1 -12   1   75.19   13.80
   1 -12  -1   55.99    6.30
   1 -12  -1   80.09   15.70
   1  12   0    6.20    7.90
   1  12   0   -0.20    1.70
  -1  12   0   -1.50    2.00
  -1  12   0    4.50    8.10
  -1  12   0    2.20    3.60
   1  12   0   -0.10    3.10
   1 -12   0    2.90    7.50
  -1 -12   0    0.40    2.00
   1 -12   0    1.60    2.00
  -1 -12   0    1.70    6.60
  -1  12  -1  107.39   17.30
  -1  12  -1  132.89   12.80
   1  12   1  128.09   11.50
   1  12   1  121.69    8.40
  -1  12  -1  114.39    8.90
   1  12   1  107.79   18.20
   1 -12   1  123.39    9.20
  -1 -12  -1  138.09   17.90
  -1 -12  -1  108.79    8.00
   1 -12   1  119.39   15.70
   1  12   2   -3.20    9.40
   1  12   2   -1.50    1.60
  -1  12  -2    5.50    7.30
  -1  12  -2   -0.60    1.90
  -1  12  -2   -0.90    3.70
   1  12   2   -1.10    3.10
  -1  12  -2    0.60    0.70
   1 -12   2    2.00    5.50
   1 -12   2    1.20    2.50
  -1 -12  -2   -0.30    1.90
  -1 -12  -2    5.50    8.50
   1 -12   2    0.70    0.90
  -1  12  -3  105.49   16.30
  -1  12  -3   91.19    4.60
  -1  12  -3   92.99    8.60
   1  12   3   81.49    9.40
   1  12   3   97.59    7.10
   1  12   3   86.39   18.70
  -1 -12  -3   95.39   18.50
  -1 -12  -3   86.69    7.00
   1 -12   3   96.29    4.90
   1 -12   3  102.49   14.00
   1 -12   3   89.99   10.00
   1  12   4   19.60    3.60
   1  12   4   18.50    5.50
   1  12   4   28.60   20.10
  -1  12  -4   19.70    7.20
  -1  12  -4   24.20    3.10
  -1  12  -4   22.80    5.20
  -1  12  -4   16.40    7.70
  -1 -12  -4   22.10    4.20
   1 -12   4   21.60    3.10
  -1 -12  -4   16.90   11.40
   1 -12   4   22.20    7.60
   1 -12   4   17.50    4.60
  -1  12  -5  294.27   11.20
  -1  12  -5  291.97   15.70
   1  12   5  291.77   11.90
   1  12   5  287.87    8.30
  -1  12  -5  251.57   20.00
   1  12   5  284.67   17.60
   1  12   5  276.87   28.80
  -1 -12  -5  289.77    8.20
   1 -12   5  310.17   26.70
  -1 -12  -5  335.57   30.40
  -1 -12  -5  283.47   12.00
   1 -12   5  278.27   15.30
   1 -12   5  293.37   11.40
   1  12   6   38.40   17.00
  -1  12  -6   39.90    5.00
  -1  12  -6   28.80    8.50
   1  12   6   46.10    5.40
   1  12   6   44.30    8.90
   1  12   6   42.90    3.70
  -1  12  -6   29.00    9.10
  -1 -12  -6   42.50    3.60
   1 -12   6   27.30    8.20
   1 -12   6   36.70    5.00
  -1 -12  -6   27.80   12.20
  -1  12  -7   53.09    5.80
   1  12   7   55.19    4.60
   1  12   7   51.89    4.50
  -1  12  -7   48.10   10.40
   1  12   7   43.90    9.10
  -1  12  -7   54.49   11.50
  -1  12  -7   35.50    6.80
  -1 -12  -7   58.99   17.30
   1 -12   7   51.09    5.70
  -1 -12  -7   52.09    4.60
   1 -12   7   54.99   10.40
  -1 -12  -7   56.49    4.70
  -1  12  -8    0.30    2.70
  -1  12  -8    3.50    3.30
   1  12   8   -0.70    4.20
   1  12   8    0.70    1.50
  -1  12  -8    1.00    7.00
  -1  12  -8    3.40    6.90
   1  12   8    0.20    2.20
   1 -12   8   -3.10    6.00
  -1 -12  -8    1.90    1.70
  -1 -12  -8    7.80   12.10
   1 -12   8   -1.40    2.70
  -1 -12  -8    1.60    2.30
   1  12   9    9.20    1.80
  -1  12  -9    8.10    3.60
  -1  12  -9   12.70    7.00
   1  12   9    7.60    3.20
   1  12   9   16.80    7.00
  -1  12  -9   10.90    7.30
  -1  12  -9    8.10    4.40
   1 -12   9    7.20    6.60
  -1 -12  -9    8.50    3.10
  -1 -12  -9    7.60   11.90
   1 -12   9    3.60    3.70
  -1 -12  -9    6.90    1.90
   1  12  10   10.60    3.80
  -1  12 -10    5.80    8.40
  -1  12 -10    5.30    4.40
  -1  12 -10    1.10    6.40
  -1  12 -10    4.90    3.80
  -1  12 -10    0.70    5.60
   1  12  10    6.70    6.20
   1 -12  10    6.70    4.60
  -1 -12 -10   -8.10   12.70
  -1 -12 -10    6.80    3.20
  -1  12 -11   72.99    9.40
   1  12  11   74.09   13.60
  -1  12 -11   78.09   11.20
  -1  12 -11   54.69   14.30
   1  12  11   80.19    8.90
  -1 -12 -11   81.99   23.70
  -1 -12 -11   80.69    8.00
  -1  12 -12   49.40   16.30
   1  12  12   21.90    5.70
   1  12  12   -1.70   20.50
   1  12  12   39.60   11.40
  -1  12 -12   29.10    7.50
  -1  12 -12   35.50    6.70
  -1 -12 -12   22.70   19.20
  -1 -12 -12   40.80    6.80
  -1  12 -13  165.58   14.00
  -1  12 -13  217.18   28.40
  -1  12 -13  172.88   15.40
   1  12  13  151.38   20.10
  -1 -12 -13  173.48   34.30
  -1 -12 -13  179.68   13.00
  -1  12 -14   63.99   12.40
  -1  12 -14   67.39   18.90
   1  12  14   64.19   15.20
  -1  12 -14   57.09   10.20
  -1 -12 -14   60.29    9.20
  -1 -12 -14   76.79   28.40
  -1  12 -15   10.90   18.80
   1  12  15   32.40   13.40
  -1  12 -15   28.60    8.60
  -1  12 -15   26.70    7.70
  -1 -12 -15   28.00    7.70
   1  12  16   30.50   14.10
  -1  12 -16   42.20   11.90
  -1  12 -16   29.30   21.40
  -1 -12 -16   33.00    8.80
   1  13 -16    5.60   18.60
  -1  13  16    7.20   12.60
   1  13 -16    5.00    8.70
   1 -13 -16   -1.50    6.20
  -1  13  15    2.50   11.60
   1  13 -15   10.50    7.30
   1  13 -15    9.80    8.30
   1  13 -15   21.00   17.10
   1 -13 -15   -2.50    5.20
  -1  13  14  447.86   31.60
   1  13 -14  392.66   37.00
   1  13 -14  409.36   22.00
   1  13 -14  406.76   24.20
   1 -13 -14  436.06   52.39
   1 -13 -14  401.76   19.00
  -1  13  13   23.00    6.80
   1  13 -13   14.30    5.90
  -1  13  13    3.80    8.40
   1  13 -13   16.90   12.60
   1 -13 -13   23.30   21.00
   1 -13 -13    7.90    4.50
   1  13 -12  850.51   29.80
   1  13 -12  774.52   33.20
   1  13 -12  794.62   46.10
  -1  13  12  793.32   26.10
  -1  13  12  847.32   40.40
   1 -13 -12  791.82   25.60
   1 -13 -12  855.01   61.69
   1  13 -11   -4.00    3.50
   1  13 -11    6.60   10.00
  -1  13  11    3.00    7.50
   1  13 -11   -0.60    3.70
  -1  13  11   -2.00    1.60
  -1  13  11    4.10    3.70
  -1 -13  11   -9.20    4.40
   1 -13 -11    7.80   16.60
   1 -13 -11    0.70    3.00
   1 -13 -11    0.30    2.20
  -1  13  10  605.44   32.20
   1  13 -10  614.84   27.40
   1  13 -10  598.04   37.20
  -1  13  10  627.34   19.80
   1  13 -10  646.34   23.20
   1 -13 -10  722.03   53.09
  -1 -13  10  624.84   23.50
   1 -13 -10  671.43   20.10
   1 -13 -10  601.64   17.80
   1  13  -9    3.90    7.20
   1  13  -9    3.60    3.30
  -1  13   9    5.10    2.80
  -1  13   9    5.80    4.10
  -1  13   9    5.20    5.70
   1  13  -9   10.80    5.40
  -1 -13   9    2.90    3.60
   1 -13  -9    6.50    2.60
   1 -13  -9    4.00    2.30
   1 -13  -9    5.50   13.00
   1  13  -8   26.30    5.80
  -1  13   8   19.80    7.10
  -1  13   8   20.50    4.10
   1  13  -8   31.70    5.30
   1  13  -8   16.60    5.10
  -1  13   8   21.40    3.40
   1  13  -8   38.90   11.60
  -1 -13   8   32.60    6.20
   1 -13  -8   20.50    4.00
  -1 -13   8   25.70    5.20
   1 -13  -8   26.80    3.60
   1 -13  -8   30.70   14.80
  -1  13   7   21.10    2.90
   1  13  -7   17.40    5.10
  -1  13   7   19.70    4.00
   1  13  -7   25.40    9.90
   1  13  -7   21.40    7.10
  -1  13   7   19.00    7.60
   1  13  -7   17.00    3.90
   1 -13  -7   21.30    4.20
   1 -13  -7   18.00   14.30
   1 -13  -7   17.80    2.50
  -1 -13   7   17.30    4.10
  -1 -13   7    5.70    5.60
   1  13  -6  822.22   32.50
  -1  13   6  825.42   16.80
   1  13  -6  866.91   38.20
  -1  13   6  787.42   33.50
  -1  13   6  871.81   25.00
   1  13  -6  862.91   30.20
  -1 -13   6  785.72   30.90
  -1 -13   6  793.72   23.00
   1 -13  -6  796.42   49.00
   1 -13  -6  793.62   24.30
   1 -13  -6  812.02   16.90
   1  13  -5   16.60    8.40
  -1  13   5   13.30    3.30
  -1  13   5    9.90    5.30
   1  13  -5   12.60    2.60
   1  13  -5   16.20    6.60
  -1  13   5   15.60   15.20
   1 -13  -5   17.70   11.70
  -1 -13   5   18.50    7.30
   1 -13  -5   11.70    3.50
  -1 -13   5    6.50    2.50
  -1 -13   5   11.30    4.60
   1  13  -4 2381.16   69.69
  -1  13   4 2342.07   65.29
   1  13  -4 2319.47   58.89
   1  13  -4 2392.86   67.69
  -1  13   4 2345.27   54.69
  -1  13   4 2370.26   87.39
   1  13  -4 2346.37   47.10
   1 -13  -4 2247.08   54.39
  -1 -13   4 2293.37   58.29
  -1 -13   4 2318.87   67.29
   1 -13  -4 2417.06   85.49
  -1 -13   4 2325.07   47.90
   1  13  -3   11.90    8.70
   1  13  -3    3.00    1.10
  -1  13   3    3.60    3.90
  -1  13   3    3.90    2.50
   1  13  -3    1.80    4.30
   1  13  -3    0.50    2.40
  -1 -13   3    3.20    1.20
  -1 -13   3   -3.70    6.00
  -1 -13   3    1.20    2.90
   1 -13  -3    4.40    2.50
   1 -13  -3    5.50    8.50
  -1  13   2 1098.99   53.19
   1  13  -2 1105.19   39.40
  -1  13   2 1083.99   38.90
  -1  13   2 1094.89   31.60
   1  13  -2 1102.49   33.10
   1  13  -2 1049.99   45.60
  -1 -13   2 1004.70   43.50
   1 -13  -2 1086.89   51.49
  -1 -13   2 1003.00   33.70
   1 -13  -2 1059.69   31.40
  -1  13   1   12.40   11.20
  -1  13   1   15.50    4.10
  -1  13   1   14.20    6.10
   1  13  -1   16.90   11.10
   1  13  -1   19.30    6.60
   1  13  -1   17.00    4.50
   1 -13  -1   17.50    4.00
   1 -13  -1    7.80    8.30
  -1 -13   1   15.50    4.50
  -1 -13   1   15.30    7.70
   1  13   0   44.30   12.90
   1  13   0   37.80    6.40
   1  13   0   45.50    8.80
  -1  13   0   34.20   13.10
  -1  13   0   31.20    5.60
  -1  13   0   41.80    9.30
   1 -13   0   38.90    6.50
   1 -13   0   23.30   10.00
  -1 -13   0   31.90    5.60
  -1 -13   0   37.40   11.40
   1  13   1    4.80    4.50
   1  13   1    0.60   10.00
  -1  13  -1   20.60    7.10
   1  13   1    5.40    2.90
  -1  13  -1   15.60    4.20
  -1  13  -1   15.40    9.90
   1 -13   1    7.50    7.60
  -1 -13  -1    6.50    2.90
   1 -13   1   12.30    4.80
  -1 -13  -1   14.00    9.20
   1  13   2  153.68   22.00
  -1  13  -2  166.48   15.10
  -1  13  -2  162.28   20.10
   1  13   2  146.99   13.00
  -1  13  -2  158.08   11.10
   1  13   2  160.58    9.90
  -1 -13  -2  156.38   10.00
  -1 -13  -2  166.88   21.70
   1 -13   2  173.48   19.10
   1 -13   2  177.28   11.70
  -1  13  -3    7.30    3.10
  -1  13  -3    3.10    5.00
  -1  13  -3    6.90    9.20
  -1  13  -3    7.20    1.50
   1  13   3    5.20    2.50
   1  13   3   10.40    4.50
  -1 -13  -3    7.40    3.30
   1 -13   3    6.00    7.40
   1 -13   3    7.20    1.80
   1 -13   3    6.80    3.60
  -1 -13  -3    1.40    8.30
  -1  13  -4 1760.92   50.29
   1  13   4 1728.73   71.79
   1  13   4 1677.43   50.99
  -1  13  -4 1752.52   58.99
   1  13   4 1767.32   42.20
  -1  13  -4 1758.92   57.29
  -1  13  -4 1670.43   36.70
  -1 -13  -4 1715.73   71.69
   1 -13   4 1706.63   37.40
   1 -13   4 1658.03   56.19
   1 -13   4 1765.82   47.50
  -1 -13  -4 1650.33   41.80
  -1  13  -5   -2.00    5.60
  -1  13  -5    1.90    2.90
  -1  13  -5    3.20    1.90
   1  13   5    0.50   14.00
   1  13   5   -0.60    3.90
   1  13   5    2.30    2.20
  -1  13  -5   -3.10    8.10
   1 -13   5    0.70    6.30
  -1 -13  -5    2.40   11.00
   1 -13   5    4.40    2.30
  -1 -13  -5    4.60    2.50
   1  13   6 1786.72   54.19
   1  13   6 1847.52   42.40
  -1  13  -6 1845.72   42.20
  -1  13  -6 1834.72   51.09
   1  13   6 1799.42   37.00
  -1  13  -6 1807.62   62.09
  -1 -13  -6 1752.82   42.10
   1 -13   6 1806.22   42.30
  -1 -13  -6 1803.22   37.00
  -1 -13  -6 1854.11   78.69
  -1  13  -7    4.80    8.70
  -1  13  -7    0.30    2.80
  -1  13  -7    7.60    6.50
   1  13   7    3.50    1.90
  -1  13  -7   -0.20    3.40
   1  13   7    4.20    5.30
  -1 -13  -7    2.90   12.00
  -1 -13  -7    2.80    1.90
   1 -13   7    3.30    3.20
   1 -13   7    4.80    7.20
  -1 -13  -7    6.70    2.70
  -1  13  -8    7.10    8.10
   1  13   8   21.00    7.40
  -1  13  -8   14.90    5.60
   1  13   8   13.50    4.10
   1  13   8   19.90    3.40
  -1  13  -8   19.90    9.10
  -1  13  -8   12.40    3.90
   1 -13   8   15.10    4.70
  -1 -13  -8   19.60    4.60
  -1 -13  -8   30.40   16.40
   1 -13   8   15.50    8.10
  -1 -13  -8   12.50    2.70
  -1  13  -9    2.20    9.10
   1  13   9    0.70    1.50
  -1  13  -9   14.40    4.50
  -1  13  -9    3.00    7.70
   1  13   9    5.10    3.10
  -1  13  -9    5.20    3.90
   1  13   9    6.70    6.50
  -1 -13  -9   12.30   15.00
   1 -13   9    5.50    4.10
   1 -13   9    1.30    7.00
  -1 -13  -9    5.50    2.80
  -1 -13  -9    6.70    2.20
  -1  13 -10  180.18   12.30
   1  13  10  189.78   10.70
  -1  13 -10  191.48   23.90
  -1  13 -10  180.38   14.60
   1  13  10  188.08   18.00
   1 -13  10  183.08   12.80
  -1 -13 -10  175.48   10.30
  -1 -13 -10  176.48   31.90
  -1  13 -11    2.60    4.70
   1  13  11   11.30   13.50
  -1  13 -11    5.10    4.20
   1  13  11    6.70    3.80
  -1  13 -11    9.30   11.10
   1  13  11   -6.40    6.60
  -1 -13 -11    7.40    3.40
  -1 -13 -11   23.20   18.50
   1  13  12  367.56   17.50
   1  13  12  377.06   26.80
  -1  13 -12  394.26   19.90
  -1  13 -12  390.96   22.40
  -1  13 -12  326.67   33.50
  -1 -13 -12  357.36   16.70
  -1 -13 -12  396.46   49.10
   1  13  13   11.00    9.40
  -1  13 -13   -0.60    5.40
  -1  13 -13   22.00   15.30
  -1  13 -13   -5.00    5.00
  -1 -13 -13   -2.80   21.70
  -1 -13 -13    0.10    4.60
  -1  13 -14  485.95   26.90
   1  13  14  564.84   35.20
  -1  13 -14  500.85   25.40
  -1  13 -14  547.15   44.90
  -1 -13 -14  485.55   21.80
   1  13  15    1.00   11.50
  -1  13 -15   13.10    9.20
  -1  13 -15    6.60   16.30
  -1 -13 -15    4.50    6.20
   1  13  16  133.09   23.20
  -1  13 -16   92.79   30.50
  -1 -13 -16  152.78   15.00
  -1  14  15    4.60   13.10
   1  14 -15   20.60   16.70
   1  14 -15   21.50    8.40
   1 -14 -15   12.90    6.30
  -1  14  14   71.29   15.40
   1  14 -14   88.79   23.10
   1  14 -14   91.39   11.90
   1  14 -14   74.39   14.80
   1 -14 -14  108.09   10.40
  -1  14  13    3.10    6.00
   1  14 -13    2.80    5.60
  -1  14  13    4.60    9.60
   1  14 -13   -0.20    5.60
   1  14 -13   17.10   13.20
   1 -14 -13    2.00    3.90
   1 -14 -13   19.30   24.50
   1  14 -12  135.89   16.10
   1  14 -12  120.39   11.50
  -1  14  12   98.29   17.00
   1  14 -12  102.49   21.70
   1 -14 -12  139.99    9.40
   1 -14 -12  101.89   29.60
  -1  14  11    0.70    2.00
  -1  14  11    3.10    7.90
   1  14 -11   -1.90    5.00
  -1  14  11    8.60    4.20
   1  14 -11   20.20   12.00
   1 -14 -11    4.30    3.10
  -1 -14  11    2.30    5.80
   1 -14 -11    2.20    2.50
   1 -14 -11    6.90   18.80
  -1  14  10   36.90   10.90
  -1  14  10   50.59    5.90
   1  14 -10   42.00   12.50
   1  14 -10   51.59    9.50
   1  14 -10   34.20    6.40
   1 -14 -10   26.90   18.00
   1 -14 -10   38.20    4.90
  -1 -14  10   31.10    6.50
   1 -14 -10   40.20    7.70
  -1  14   9   -2.30    2.30
   1  14  -9   -1.30    3.90
  -1  14   9    0.20    2.40
   1  14  -9    5.10    7.70
   1  14  -9    3.70    3.30
  -1  14   9   -7.10    5.80
   1 -14  -9   -0.50    2.60
  -1 -14   9    2.90    3.80
   1 -14  -9   -4.20   15.30
   1 -14  -9    0.10    2.10
  -1  14   8    4.40    2.90
   1  14  -8    2.30    3.40
  -1  14   8   10.30    7.10
   1  14  -8    4.40    3.60
   1  14  -8    0.10    5.90
  -1  14   8    1.00    2.10
   1  14  -8   14.20    8.80
  -1 -14   8    0.50    3.30
   1 -14  -8    1.80    2.90
   1 -14  -8    3.10    2.00
   1 -14  -8   -8.80   13.30
  -1 -14   8   -1.10    5.50
   1  14  -7   29.50   11.40
   1  14  -7   17.30    4.00
  -1  14   7   20.30    2.10
  -1  14   7   25.60    8.70
   1  14  -7   22.40    8.40
   1  14  -7   26.80    6.70
  -1  14   7   19.60    4.30
   1 -14  -7   18.00    1.90
   1 -14  -7   20.60    4.20
   1 -14  -7   17.10   14.20
  -1 -14   7   26.90    4.80
  -1 -14   7   11.60    7.20
   1  14  -6   40.40   11.00
  -1  14   6   30.90    5.20
  -1  14   6   26.70    7.70
   1  14  -6   30.70    6.70
   1  14  -6   26.80    4.10
   1  14  -6   39.50   10.20
   1 -14  -6   25.80   15.90
   1 -14  -6   33.30    5.50
  -1 -14   6   30.60    8.90
  -1  14   5    0.30    2.10
   1  14  -5    1.40    1.60
   1  14  -5    3.60    3.70
  -1  14   5    4.50    4.90
   1  14  -5   12.10    9.10
   1  14  -5   -0.50    5.20
  -1 -14   5    3.20    2.10
  -1 -14   5    4.00    7.30
   1 -14  -5   12.60   11.80
   1 -14  -5    3.00    2.80
  -1  14   4   59.39    6.40
   1  14  -4   62.89    3.60
   1  14  -4   55.69   13.40
  -1  14   4   50.29   18.30
   1  14  -4   48.30   10.40
   1  14  -4   42.70    6.70
  -1  14   4   60.59   11.50
  -1 -14   4   57.49    3.80
   1 -14  -4   40.30   16.00
   1 -14  -4   53.49    6.50
   1  14  -3   11.80    5.70
  -1  14   3   -4.90   13.40
  -1  14   3   10.10    5.70
  -1  14   3   17.00    4.30
   1  14  -3   22.10    6.00
   1  14  -3   13.00   10.10
   1 -14  -3   14.10    4.00
   1 -14  -3   12.80    9.90
  -1 -14   3   16.30    4.60
  -1 -14   3   15.10    7.60
   1  14  -2   16.60    7.10
   1  14  -2   12.40   10.90
   1  14  -2   12.50    4.10
  -1  14   2    9.30    3.50
  -1  14   2    5.80   13.20
  -1  14   2   21.50    7.70
   1 -14  -2   11.20    3.80
  -1 -14   2   10.30    8.20
  -1 -14   2   13.30    4.40
   1 -14  -2    2.80    9.30
   1  14  -1   68.49   11.70
   1  14  -1   62.19    7.10
   1  14  -1   71.59   16.40
  -1  14   1   89.59   13.40
  -1  14   1   65.59    7.50
  -1  14   1   72.89   17.70
  -1 -14   1   83.89   16.60
  -1 -14   1   71.49    7.90
   1 -14  -1   68.49   16.00
   1 -14  -1   68.39    7.70
   1  14   0   -0.20    4.70
  -1  14   0    4.80    4.90
   1  14   0    0.40    2.60
   1  14   0   -3.00   11.60
  -1  14   0   -9.30   10.80
  -1  14   0   -1.40    2.30
   1 -14   0    7.80    9.00
   1 -14   0    0.40    2.80
  -1 -14   0   -2.60    8.80
  -1 -14   0   -0.90    3.30
   1  14   1    5.10    4.60
   1  14   1    3.90   11.40
  -1  14  -1    6.00    5.10
  -1  14  -1    3.00    3.40
  -1  14  -1   -2.40   10.00
   1  14   1    0.50    2.20
  -1 -14  -1    0.40    9.10
  -1 -14  -1    6.60    3.30
   1 -14   1   10.10    8.50
   1 -14   1    3.30    3.10
   1  14   2   -3.80   11.70
   1  14   2   -0.10    2.30
   1  14   2   -3.30    3.80
  -1  14  -2    2.50    5.40
  -1  14  -2    2.90    2.60
  -1  14  -2   -7.90    9.60
   1 -14   2   -4.00    7.10
  -1 -14  -2   -2.40    8.90
  -1 -14  -2    1.60    2.60
   1 -14   2    1.80    3.30
  -1  14  -3  249.88    6.40
  -1  14  -3  250.07   14.80
  -1  14  -3  207.58   18.60
   1  14   3  231.48   16.60
  -1  14  -3  233.38   24.00
   1  14   3  231.68   12.40
   1  14   3  207.28   28.00
  -1 -14  -3  244.28   12.90
  -1 -14  -3  252.37   27.40
   1 -14   3  242.08    7.00
   1 -14   3  230.98   21.70
  -1  14  -4   28.00    3.10
   1  14   4   17.30    6.40
   1  14   4   13.50   15.10
  -1  14  -4   20.50    8.40
  -1  14  -4   31.70    6.90
  -1  14  -4   26.80   11.40
   1  14   4   27.20    5.10
   1 -14   4   25.00    3.30
   1 -14   4   23.20    9.60
  -1 -14  -4   23.30    4.50
  -1  14  -5   53.99   13.20
  -1  14  -5   59.29    9.40
  -1  14  -5   69.69   14.20
   1  14   5   47.30    9.80
  -1  14  -5   59.39    4.80
   1  14   5   55.09    6.00
   1 -14   5   56.39   12.20
   1 -14   5   52.09    4.90
  -1 -14  -5   48.30    5.90
  -1 -14  -5   62.69   18.70
   1  14   6   23.90    7.40
  -1  14  -6   20.50   11.30
  -1  14  -6   19.70    5.40
  -1  14  -6   26.90   10.80
  -1  14  -6   24.50    4.40
   1  14   6   24.20    4.30
   1 -14   6   21.90    9.80
   1 -14   6   27.60    4.30
  -1 -14  -6   29.40    4.80
  -1 -14  -6   29.40   15.70
  -1 -14  -6   24.40    1.70
   1  14   7   74.79   13.10
  -1  14  -7   73.39    6.80
  -1  14  -7   74.09   16.00
   1  14   7   69.89    4.30
  -1  14  -7   82.29   11.50
   1  14   7   68.59    5.90
   1 -14   7   76.59    7.10
  -1 -14  -7   64.29   19.50
  -1 -14  -7   63.99    4.10
  -1 -14  -7   60.99    5.90
   1  14   8    2.80    2.40
   1  14   8    5.60    5.40
  -1  14  -8    6.10    9.30
  -1  14  -8    6.10    4.10
  -1  14  -8   -0.90    3.00
  -1  14  -8    4.10    9.40
   1 -14   8    5.90    3.60
  -1 -14  -8   -2.40    2.70
   1 -14   8   -1.90    7.70
  -1 -14  -8    1.10    2.00
  -1 -14  -8    2.50   15.70
  -1  14  -9   69.69   15.80
  -1  14  -9   92.59   10.80
   1  14   9   79.29   13.60
  -1  14  -9   86.39    8.50
   1  14   9   79.89    6.60
   1 -14   9   63.09    8.50
  -1 -14  -9   77.99    5.40
  -1 -14  -9   68.19    5.80
   1 -14   9   69.29   11.60
  -1 -14  -9   93.89   26.10
  -1  14 -10   19.20    6.70
  -1  14 -10    1.00    6.30
  -1  14 -10   15.10    5.30
   1  14  10   11.70    7.70
   1  14  10    7.20    4.20
  -1  14 -10    1.80    7.10
  -1  14 -10   24.50   11.40
   1 -14  10   11.90    5.70
  -1 -14 -10   17.40    4.00
  -1 -14 -10   13.20    2.10
  -1 -14 -10   21.40   19.00
  -1  14 -11   -2.70    4.70
  -1  14 -11   -0.50   12.10
   1  14  11   -2.70    4.30
   1  14  11   -3.30    7.40
   1  14  11    7.50   14.70
  -1  14 -11    6.10    5.70
  -1 -14 -11   -0.50    3.20
  -1 -14 -11   -0.40   23.20
  -1  14 -12   25.30   14.40
  -1  14 -12   40.90    8.50
   1  14  12   48.80   12.50
  -1  14 -12   45.60    9.90
   1  14  12  -19.40   16.90
  -1 -14 -12   42.30   24.50
  -1 -14 -12   43.30    6.10
  -1  14 -13   11.90   14.80
  -1  14 -13    6.00    6.70
   1  14  13   -5.00    8.50
  -1  14 -13   -1.30    5.80
   1  14  13   -0.40    9.10
  -1  14 -14   74.69   10.70
   1  14  14   82.29   17.00
  -1  14 -14   99.69   23.50
  -1 -14 -14   82.69   10.00
  -1  14 -15   10.90    8.80
   1  14  15    4.90   13.30
  -1  14 -15  -12.80   16.60
  -1 -14 -15    3.70    6.50
  -1  15  15    2.00   12.10
   1  15 -15   -2.20    7.70
   1  15 -15  -16.70   17.00
  -1  15  14  323.67   29.00
   1  15 -14  317.57   20.10
   1  15 -14  282.97   34.60
   1 -15 -14  279.57   18.70
   1  15 -13    2.90    6.20
   1  15 -13   -2.40   12.60
  -1  15  13   12.30   10.80
   1 -15 -13    6.50    4.80
   1  15 -12  463.65   21.30
  -1  15  12  487.55   31.40
   1  15 -12  513.55   39.50
   1  15 -12  496.35   26.90
   1 -15 -12  475.25   17.60
   1 -15 -12  482.35   51.39
  -1  15  11    0.30    2.30
  -1  15  11   -2.70    4.00
   1  15 -11    5.70    5.30
   1  15 -11   13.40   15.30
   1  15 -11   12.60    6.20
  -1  15  11    7.10    8.80
   1 -15 -11    7.70    3.60
   1 -15 -11   11.30   20.00
   1 -15 -11    8.10    3.30
  -1  15  10  345.37   25.80
   1  15 -10  410.96   32.60
   1  15 -10  386.86   22.70
   1  15 -10  367.26   16.70
   1 -15 -10  354.46   13.90
   1 -15 -10  382.76   44.70
  -1 -15  10  389.36   18.20
  -1  15   9   18.90    8.50
   1  15  -9   30.90   11.40
   1  15  -9   23.20    4.70
   1  15  -9   23.90    7.00
   1 -15  -9   17.90   18.60
  -1 -15   9   18.60    5.20
   1 -15  -9   13.60    4.40
   1 -15  -9   18.70    2.80
   1  15  -8    0.50    8.30
   1  15  -8    3.40    3.90
   1  15  -8    1.60    6.80
  -1  15   8    6.20    6.90
   1  15  -8    7.00    3.20
  -1  15   8    0.90    2.90
   1 -15  -8    0.00    1.20
   1 -15  -8   24.20   16.80
  -1 -15   8   -0.20    3.10
  -1 -15   8    5.80    6.60
   1 -15  -8    1.20    3.20
   1  15  -7    8.20    4.50
   1  15  -7   -0.10    7.80
   1  15  -7   10.20    8.90
  -1  15   7    6.20    3.00
  -1  15   7    4.70    6.60
   1  15  -7    3.70    2.90
   1 -15  -7    0.10    3.20
  -1 -15   7    5.60    3.20
  -1 -15   7    6.00    7.50
   1 -15  -7   -6.30   13.30
   1  15  -6  430.26   13.60
   1  15  -6  390.96   27.00
  -1  15   6  402.06   24.80
  -1  15   6  402.06   17.20
   1  15  -6  442.06   22.00
  -1 -15   6  432.76   14.40
   1 -15  -6  426.56   17.60
   1 -15  -6  465.55   40.50
  -1  15   5    2.00    2.80
  -1  15   5   -0.20    5.80
   1  15  -5   -0.40    9.50
   1  15  -5    0.00    3.10
   1  15  -5    2.00    1.70
   1  15  -5    6.40    6.40
  -1 -15   5    1.40    2.00
   1 -15  -5    2.70    3.30
  -1 -15   5    1.50    8.10
   1 -15  -5    5.80   12.60
  -1  15   4 2616.34   73.29
   1  15  -4 2513.45   77.29
   1  15  -4 2529.15   48.30
   1  15  -4 2585.94   75.09
  -1  15   4 2529.15   60.79
   1  15  -4 2494.15   65.09
  -1 -15   4 2531.55   49.10
   1 -15  -4 2596.84   95.19
  -1 -15   4 2529.85   75.39
   1 -15  -4 2619.74   74.89
   1  15  -3   15.20    7.20
  -1  15   3   21.50   20.30
  -1  15   3   15.30    6.60
   1  15  -3   13.60    4.70
   1  15  -3    5.40   11.10
  -1  15   3   15.20    4.40
  -1 -15   3   19.00    9.90
   1 -15  -3    2.10   13.00
   1 -15  -3    8.00    3.80
   1  15  -2 1230.98   53.99
   1  15  -2 1228.18   44.90
   1  15  -2 1327.97   39.10
  -1  15   2 1270.77   37.10
  -1  15   2 1224.98   44.70
  -1  15   2 1194.38   60.69
   1 -15  -2 1226.68   59.49
  -1 -15   2 1207.18   52.19
   1 -15  -2 1190.88   36.20
  -1  15   1   14.70    6.60
   1  15  -1    9.30    5.10
   1  15  -1   15.70    6.90
  -1  15   1   11.30    3.80
  -1  15   1    0.10   14.30
   1  15  -1   30.30   13.80
  -1 -15   1   10.60    4.10
   1 -15  -1   15.10   11.40
  -1 -15   1    9.70    9.70
   1 -15  -1   10.90    4.10
   1  15   0   17.10    4.90
   1  15   0   17.60   13.20
  -1  15   0   21.90    8.10
   1  15   0   19.90    7.00
  -1  15   0   16.80    6.20
   1 -15   0   25.90   12.10
  -1 -15   0   16.90   11.30
  -1 -15   0   23.70    5.70
   1 -15   0   21.10    5.40
  -1  15  -1   21.10    5.30
   1  15   1   16.00   13.70
   1  15   1   13.80    4.50
  -1  15  -1    5.80   12.60
  -1  15  -1   20.20    7.60
   1  15   1   21.10    7.20
   1 -15   1   24.50   11.10
  -1 -15  -1    8.00   11.40
  -1 -15  -1   24.30    5.30
   1  15   2  492.55   25.10
  -1  15  -2  454.95   34.60
  -1  15  -2  467.35   21.20
   1  15   2  457.45   19.20
   1  15   2  486.45   39.60
  -1  15  -2  454.85   27.30
  -1 -15  -2  425.06   20.90
   1 -15   2  472.65   31.90
  -1 -15  -2  500.85   37.30
  -1  15  -3   24.60    5.90
  -1  15  -3   12.20    8.20
  -1  15  -3   16.80   12.60
   1  15   3   16.80    4.50
   1  15   3   17.10    7.00
  -1 -15  -3   23.70   13.80
  -1 -15  -3   19.80    4.90
   1 -15   3   20.70   10.80
  -1  15  -4 1145.29   38.20
  -1  15  -4 1142.79   47.20
  -1  15  -4 1191.98   25.00
  -1  15  -4 1130.29   49.70
   1  15   4 1227.48   43.10
   1  15   4 1256.07   34.10
  -1 -15  -4 1139.79   33.50
   1 -15   4 1172.28   25.80
  -1 -15  -4 1166.38   61.29
   1 -15   4 1147.49   47.80
   1  15   5    4.50    5.20
  -1  15  -5   -4.60    6.80
  -1  15  -5    1.40   10.60
  -1  15  -5    2.30    1.90
   1  15   5   -0.90    2.30
  -1  15  -5   -0.90    3.10
   1 -15   5    2.20    2.00
  -1 -15  -5    3.00    3.00
  -1 -15  -5    0.70   12.00
   1 -15   5   -7.50    9.00
  -1  15  -6  968.40   45.30
   1  15   6 1039.20   28.70
  -1  15  -6  959.90   35.10
  -1  15  -6  994.20   42.90
   1  15   6  992.30   39.20
  -1  15  -6 1013.30   28.00
  -1 -15  -6  952.50   28.20
   1 -15   6  937.11   25.80
  -1 -15  -6 1016.10   60.49
   1 -15   6  985.80   41.60
  -1  15  -7    1.50    2.60
   1  15   7    0.40    2.60
  -1  15  -7   -2.70    8.20
   1  15   7    1.40    6.00
  -1  15  -7   -4.40   10.40
  -1  15  -7    3.80    4.40
  -1 -15  -7    5.90   15.00
  -1 -15  -7   -0.60    2.80
   1 -15   7   -0.50    3.10
   1 -15   7   -8.70    8.10
  -1  15  -8   33.30    7.80
  -1  15  -8   18.00   10.90
   1  15   8   33.90    9.90
  -1  15  -8   29.30    5.20
  -1 -15  -8   26.20    4.60
  -1 -15  -8   57.49   21.40
  -1 -15  -8   39.50    3.50
   1 -15   8   24.60    5.60
   1 -15   8   36.90   11.00
   1  15   9   -1.90    7.70
  -1  15  -9    8.10    5.40
  -1  15  -9    6.70    3.80
  -1  15  -9   11.20    9.60
   1  15   9   -0.20    2.70
   1  15   9    0.80    2.20
  -1  15  -9    9.70   10.80
   1 -15   9   -0.30    4.40
  -1 -15  -9    7.90   18.90
   1 -15   9    7.30    8.70
  -1 -15  -9    8.50    2.60
  -1 -15  -9    7.60    3.00
  -1  15 -10  184.08   12.50
   1  15  10  190.28   19.20
  -1  15 -10  212.68   26.50
  -1 -15 -10  169.98   39.00
  -1 -15 -10  197.08    9.70
   1 -15  10  203.88   14.00
  -1 -15 -10  184.38    7.30
   1  15  11    5.70    7.70
  -1  15 -11    8.10    5.80
   1  15  11    1.20    4.30
  -1  15 -11   16.30   13.50
  -1  15 -11   19.70    7.30
   1  15  11   -2.20   16.40
  -1 -15 -11   12.10   23.20
  -1 -15 -11   13.30    4.10
   1  15  12  451.95   30.30
  -1  15 -12  511.95   41.70
  -1  15 -12  491.45   22.80
  -1  15 -12  480.55   26.80
  -1 -15 -12  507.65   19.10
  -1  15 -13    1.50    6.70
   1  15  13   14.80   10.50
  -1  15 -13    5.80   16.60
  -1 -15 -13   10.70    5.80
  -1  15 -14  479.65   36.80
  -1  15 -14  417.06   42.90
   1  15  14  495.25   34.20
  -1 -15 -14  429.26   20.20
   1  16 -14   79.09   19.50
   1  16 -14   72.79   11.00
  -1  16  14   58.89   16.50
   1  16 -13  219.98   16.00
   1  16 -13  189.28   31.40
  -1  16  13  164.68   23.70
   1  16 -12   38.60    7.50
  -1  16  12   34.70   12.30
   1  16 -12   59.49   19.90
   1 -16 -12   55.49    6.30
   1  16 -11  100.79   21.40
   1  16 -11   96.59   11.60
  -1  16  11   71.69   13.80
   1  16 -11   76.59   11.90
   1 -16 -11   77.39    6.90
   1 -16 -11   67.39   29.80
  -1  16  10    0.30    2.80
   1  16 -10    8.40    6.30
   1  16 -10   21.40   12.40
   1  16 -10    6.60    4.70
  -1  16  10    6.00    8.80
  -1  16  10   -0.50    2.80
  -1 -16  10   12.30    5.80
   1 -16 -10   13.10    2.70
   1 -16 -10   15.10    4.30
   1 -16 -10    2.90   19.90
  -1  16   9   26.80   11.00
   1 -16  -9   21.70   23.30
   1 -16  -9   26.40    5.10
  -1 -16   9   22.20    6.00
   1  16  -8   11.80    5.80
   1  16  -8   16.40   10.50
  -1  16   8   15.60    9.50
  -1  16   8    3.50    3.40
   1  16  -8   -0.90    2.70
   1  16  -8    6.50    7.90
   1 -16  -8    9.80    4.60
   1 -16  -8    8.50   16.40
  -1 -16   8    5.00    7.70
  -1 -16   8    5.40    4.20
   1  16  -7   36.50   12.40
   1  16  -7    6.70    9.90
   1  16  -7   27.40    7.40
  -1  16   7   42.10    6.30
  -1  16   7   45.50   12.00
   1 -16  -7   32.80    6.50
   1 -16  -7   53.49   21.20
  -1 -16   7   35.30   10.60
  -1 -16   7   43.70    5.30
   1  16  -6   28.90   10.70
  -1  16   6   32.00    6.00
  -1  16   6   39.20    9.40
   1  16  -6   35.50    7.80
   1  16  -6   31.30   12.40
   1 -16  -6   14.80   16.20
  -1 -16   6   26.60   11.00
  -1 -16   6   33.90    4.40
   1  16  -5  280.37   17.60
   1  16  -5  261.37   25.40
   1  16  -5  284.37   23.30
  -1  16   5  265.77   20.80
  -1  16   5  309.97   15.10
   1 -16  -5  264.47   33.50
  -1 -16   5  270.87    8.70
  -1 -16   5  241.38   22.60
   1 -16  -5  277.27   14.60
   1  16  -4    8.90   13.10
  -1  16   4   23.90    7.80
   1  16  -4   18.40    7.90
   1  16  -4   18.80    5.70
  -1  16   4   31.60    5.80
  -1 -16   4   23.80   11.40
   1 -16  -4   27.10    5.50
   1 -16  -4   24.70   14.80
  -1  16   3  452.35   19.90
   1  16  -3  449.66   21.70
   1  16  -3  487.95   28.40
   1  16  -3  411.96   33.00
  -1  16   3  422.96   25.80
  -1 -16   3  467.55   32.00
   1 -16  -3  426.56   19.60
   1 -16  -3  449.36   38.60
   1  16  -2    0.10   13.40
  -1  16   2    4.30    5.30
  -1  16   2   -0.30    5.90
   1  16  -2    1.30    3.10
   1  16  -2    5.40    5.80
   1 -16  -2   -5.20   11.80
  -1 -16   2   -4.00    9.50
   1  16  -1    3.30    6.50
   1  16  -1    1.10    2.80
  -1  16   1    2.20    3.00
  -1  16   1    4.60   16.80
  -1  16   1    8.00    6.30
  -1 -16   1   -3.90   10.20
   1 -16  -1    1.40   11.70
   1  16   0   -0.80   14.70
  -1  16   0   11.30   17.40
   1  16   0    6.40    6.40
   1  16   0    2.50    3.50
  -1  16   0    2.80    5.80
  -1  16   0    3.10    3.40
   1 -16   0   -9.30    9.70
  -1 -16   0   -8.90   11.00
   1  16   1    9.30    6.60
   1  16   1    8.60   15.40
  -1  16  -1   19.30    5.80
  -1  16  -1   25.10   16.90
  -1  16  -1   16.10    8.20
   1 -16   1   11.40   12.10
  -1 -16  -1   11.10    4.70
  -1 -16  -1   16.50   12.60
  -1  16  -2   -5.20    2.90
   1  16   2   -1.60    2.60
  -1  16  -2   -3.10    6.00
  -1  16  -2  -17.10   14.00
   1  16   2   -4.20    5.10
  -1 -16  -2    1.50    3.50
  -1 -16  -2   -1.40   12.10
   1 -16   2    2.30   10.60
  -1  16  -3  242.88   21.40
  -1  16  -3  195.78   27.10
  -1  16  -3  200.68   14.60
   1  16   3  219.48   13.00
   1  16   3  204.78   17.30
  -1 -16  -3  197.78   12.70
  -1 -16  -3  216.38   29.00
   1 -16   3  199.28   23.40
  -1  16  -4    1.50    7.50
  -1  16  -4    3.30    4.20
   1  16   4    2.20    3.20
  -1  16  -4   -8.00   13.20
   1  16   4    7.20    6.40
   1 -16   4    9.40   10.40
  -1 -16  -4    2.20    4.00
  -1 -16  -4    6.80   14.30
   1  16   5  255.47   19.60
   1  16   5  264.67   13.60
  -1  16  -5  292.07   18.10
  -1  16  -5  258.77   28.00
  -1  16  -5  263.07   24.20
   1 -16   5  239.88   23.70
  -1 -16  -5  264.27   34.40
  -1 -16  -5  251.07   13.60
   1 -16   5  265.77    9.50
   1  16   6    7.90    3.90
  -1  16  -6   17.70    6.40
  -1  16  -6   -1.00   12.60
  -1  16  -6   16.80   10.60
   1  16   6   10.70    7.00
  -1  16  -6   -0.30    2.20
  -1 -16  -6   10.50    4.10
   1 -16   6   -2.00    9.80
   1 -16   6    3.10    4.70
  -1 -16  -6    2.50   15.10
   1  16   7  128.69   15.60
   1  16   7  134.29    9.20
  -1  16  -7  136.99   13.10
  -1  16  -7  110.89   20.20
  -1 -16  -7  118.09   29.50
   1 -16   7  104.29   16.60
   1 -16   7  126.79    8.80
  -1 -16  -7  118.79    9.30
  -1  16  -8   14.50   10.70
  -1  16  -8   12.60    6.20
   1  16   8    8.60    7.90
   1 -16   8   18.10    4.90
  -1 -16  -8   16.30    4.30
  -1 -16  -8    8.70   18.40
  -1  16  -9   -0.30   11.20
  -1  16  -9   -3.00    5.00
   1  16   9   -2.20    7.40
  -1  16  -9    1.80   10.80
   1  16   9   -2.50    2.60
  -1  16  -9   -1.50    3.90
  -1 -16  -9    0.80    2.50
  -1 -16  -9    1.70    2.00
   1 -16   9    6.30    9.60
   1 -16   9   -4.40    4.80
  -1 -16  -9    0.20    3.30
  -1 -16  -9  -13.70   18.40
  -1  16 -10    3.40   11.50
   1  16  10    0.20    2.30
   1  16  10   -4.70    4.00
   1  16  10    4.10    8.10
  -1  16 -10    3.40    4.80
  -1  16 -10   -3.40    5.10
  -1 -16 -10   20.00   22.40
   1 -16  10  -12.20    5.50
  -1  16 -11  116.49   23.40
  -1  16 -11  110.99   11.40
   1  16  11  118.79   17.20
  -1  16 -11  132.89   24.10
  -1 -16 -11  121.99    8.20
  -1  16 -12   36.10   18.40
  -1  16 -12   35.10    7.80
   1  16  12   14.70   10.60
  -1 -16 -12   38.70    7.20
   1  16  13   96.19   18.70
  -1  16 -13   75.09   11.20
  -1  16 -13  112.89   25.90
   1  17 -13   -0.40    7.60
   1  17 -13   24.90   16.40
  -1  17  13   15.40   12.40
  -1  17  12  207.98   24.50
   1  17 -12  155.28   27.20
  -1  17  11   28.50   12.10
   1  17 -11   29.40   13.70
   1  17 -11   -3.10    6.00
  -1  17  11    0.60    3.80
   1  17 -10  233.78   28.40
   1  17 -10  239.48   21.50
  -1  17  10  195.58   21.60
   1 -17 -10  173.18   38.60
   1  17  -9   17.60   12.20
  -1  17   9   34.40   11.60
   1  17  -9   25.00    7.30
   1 -17  -9   19.40    5.60
  -1 -17   9   24.90    6.20
   1 -17  -9   37.30   25.00
   1  17  -8    8.10    5.90
  -1  17   8   11.00    8.40
   1  17  -8   -6.80    9.20
   1  17  -8   19.10   12.50
   1  17  -8    1.00    3.10
  -1  17   8   -0.80    3.40
  -1 -17   8    8.70    4.40
   1 -17  -8   11.80    5.70
  -1 -17   8   12.40    8.80
  -1  17   7    2.80    8.10
   1  17  -7    1.30   11.40
   1  17  -7    0.30    2.60
   1  17  -7    3.30    4.60
  -1  17   7   -0.10    3.40
   1 -17  -7   -7.40   18.30
   1 -17  -7   -3.70    4.40
  -1  17   6  212.38   19.70
   1  17  -6  186.58   15.40
   1  17  -6  201.38   21.40
  -1  17   6  190.38   12.50
  -1 -17   6  179.68    7.70
   1 -17  -6  178.28   31.40
  -1 -17   6  207.08   21.70
   1 -17  -6  193.88   13.10
   1  17  -5   13.60    8.60
   1  17  -5    6.70    5.30
  -1  17   5    7.60    4.40
  -1  17   5   10.90    7.70
   1  17  -5   18.10   14.60
  -1 -17   5   14.90   11.10
   1 -17  -5    8.60    4.70
   1 -17  -5   21.70   17.00
  -1  17   4  243.28   20.80
   1  17  -4  270.37   22.80
   1  17  -4  249.38   29.00
   1  17  -4  243.88   16.50
  -1  17   4  215.68   14.00
   1 -17  -4  241.68   32.40
  -1 -17   4  240.48   25.50
  -1  17   3    8.00    3.90
   1  17  -3    1.30   15.10
   1  17  -3    1.40    7.10
   1  17  -3   10.00    5.20
  -1  17   3    6.40    7.80
  -1 -17   3    1.30   11.00
   1 -17  -3   -7.10   13.50
   1  17  -2  707.13   34.50
  -1  17   2  615.64   32.30
  -1  17   2  639.14   25.70
   1  17  -2  546.05   46.90
   1  17  -2  669.03   27.20
   1 -17  -2  682.43   47.70
  -1 -17   2  649.24   40.70
  -1  17   1    3.60    6.80
   1  17  -1   15.40    5.10
   1  17  -1    8.30    6.50
  -1  17   1   12.10    4.90
   1  17  -1   16.10   18.50
  -1 -17   1   18.60   14.70
   1 -17  -1   -0.90   12.80
  -1  17   0  101.09   10.40
   1  17   0   65.79   22.10
   1  17   0  102.09   15.70
   1  17   0   88.79    9.70
  -1  17   0   88.89   14.40
   1 -17   0   86.49   20.40
   1  17   1   16.10    5.40
  -1  17  -1   29.80    6.50
  -1  17  -1   17.80    8.20
   1  17   1   25.40    9.00
  -1  17  -1   18.20   19.20
   1 -17   1   18.60   13.90
  -1 -17  -1   24.90   14.70
  -1  17  -2  279.47   17.60
  -1  17  -2  263.97   33.50
   1  17   2  268.07   20.60
   1  17   2  288.67   16.10
  -1  17  -2  265.37   22.90
  -1 -17  -2  296.17   33.50
   1 -17   2  275.07   28.00
   1  17   3    4.80    6.20
  -1  17  -3    4.00    4.70
  -1  17  -3   17.50   10.10
   1 -17   3   12.40   12.90
  -1 -17  -3    8.80   15.60
  -1 -17  -3    7.10    5.00
  -1  17  -4  428.16   22.70
   1  17   4  437.86   19.20
   1  17   4  443.46   26.30
  -1  17  -4  446.36   37.10
  -1  17  -4  430.86   29.70
  -1 -17  -4  472.05   42.40
   1 -17   4  419.26   31.60
  -1 -17  -4  432.46   19.70
  -1  17  -5    8.20    9.00
   1  17   5    1.70    3.50
  -1  17  -5    8.70   16.00
  -1  17  -5    1.00    1.40
   1  17   5    2.10    6.50
  -1  17  -5    5.80    4.80
  -1  17  -5    0.70    1.30
  -1 -17  -5   -2.50    4.10
   1 -17   5    5.10   11.90
  -1 -17  -5   -8.10   15.10
   1  17   6  216.18   12.50
  -1  17  -6  190.78   23.30
  -1  17  -6  213.78   16.50
   1  17   6  204.58   18.80
  -1  17  -6  182.28   27.70
   1 -17   6  205.98    9.20
  -1 -17  -6  264.97   41.20
   1 -17   6  210.28   23.90
  -1  17  -7   -4.50    4.60
  -1  17  -7    0.50    2.80
   1  17   7    1.80    3.30
   1  17   7    2.40    6.60
  -1  17  -7   -4.30   12.30
  -1  17  -7   -7.10   14.80
  -1 -17  -7    0.60   18.90
   1 -17   7   -4.10   11.40
  -1 -17  -7    0.30    4.20
   1 -17   7   -6.60    3.30
  -1  17  -8   75.49   18.80
  -1  17  -8   55.89   11.20
   1  17   8   73.59   14.50
   1 -17   8   73.09   14.90
   1 -17   8   58.59    7.40
  -1 -17  -8   69.19    7.90
  -1 -17  -8   83.69   27.40
   1  17   9    7.40    9.10
  -1  17  -9    3.90    5.70
   1  17   9    3.60    3.20
  -1  17  -9   -7.40    4.00
  -1  17  -9    8.10   12.80
   1 -17   9   11.20   10.60
  -1 -17  -9   -3.90   21.90
  -1  17 -10   -1.90    4.90
   1  17  10   30.50   11.80
  -1  17 -10   36.50   15.00
   1  17  11   49.70   14.00
  -1  17 -11   29.90   18.20
   1  17  12  347.07   28.40
  -1  17 -12  333.97   37.50
  -1  18  12   20.20   12.70
   1  18 -12   18.30   18.10
   1  18 -12   -8.20    7.00
  -1  18  11  262.27   26.20
   1  18 -11  166.78   28.20
   1  18 -10    1.10    5.10
  -1  18  10    0.90    4.50
   1  18 -10    6.70   11.90
  -1  18  10    0.20    9.60
  -1  18   9   41.70   13.50
   1  18  -9   59.09   17.00
  -1  18   8    2.60    3.90
   1  18  -8    9.10    6.10
  -1  18   8   15.30    9.70
   1  18  -8    1.80    3.20
   1  18  -8    1.50   11.30
   1 -18  -8    7.10    6.20
   1 -18  -8    8.50   22.70
  -1 -18   8   15.70   10.00
   1  18  -7   75.39   16.50
  -1  18   7   86.49    9.80
   1  18  -7   80.29   12.90
  -1  18   7   81.29   15.70
   1 -18  -7   77.69    9.60
   1 -18  -7   34.00   24.90
  -1 -18   7   83.19    8.40
  -1 -18   7   66.19   14.60
   1  18  -6   12.20   10.20
  -1  18   6   18.20    5.50
   1  18  -6   18.50    7.20
  -1  18   6   15.10    8.70
   1  18  -6    7.10   16.10
  -1 -18   6    6.20   12.70
   1 -18  -6   19.50   18.30
   1  18  -5  553.84   34.10
   1  18  -5  549.65   26.70
  -1  18   5  534.25   22.50
  -1  18   5  532.65   30.90
   1 -18  -5  570.94   50.09
  -1 -18   5  503.95   33.60
   1  18  -4   -1.50    4.70
   1  18  -4  -13.10   16.60
  -1  18   4   -0.70    3.70
  -1  18   4    4.40   12.90
   1  18  -4    2.10    8.10
   1 -18  -4   21.60   18.00
  -1 -18   4    7.00   13.00
  -1  18   3  541.15   33.50
   1  18  -3  490.85   40.40
   1  18  -3  517.25   24.90
  -1  18   3  506.35   22.60
   1 -18  -3  433.96   42.80
  -1 -18   3  455.05   35.20
  -1  18   2    2.70    7.90
   1  18  -2    3.90    9.10
  -1  18   2    2.60    4.30
   1  18  -2   -1.80   18.60
   1  18  -2    4.00    4.40
   1 -18  -2    9.60   16.20
  -1 -18   2   12.70   13.90
   1  18  -1  353.76   25.50
   1  18  -1  332.87   19.20
  -1  18   1  304.67   18.20
  -1  18   1  320.47   24.60
  -1 -18   1  381.16   34.00
   1 -18  -1  331.57   35.30
   1  18   0   12.70    8.20
  -1  18   0   29.40   10.40
  -1  18   0   18.20    5.80
   1  18   0   16.60    5.70
   1 -18   0   21.60   15.80
  -1 -18   0   22.10   15.20
  -1  18  -1    9.30    5.10
   1  18   1   18.20   12.90
   1  18   1   10.70    4.90
  -1  18  -1   15.20    8.80
  -1 -18  -1   -1.70   14.90
   1 -18   1   16.50   14.00
  -1  18  -2   12.00    5.70
   1  18   2   13.40    4.90
  -1  18  -2   14.50    9.00
  -1  18  -2    2.70   20.30
  -1 -18  -2    1.50   15.30
   1  18   3  296.47   16.60
  -1  18  -3  304.97   19.10
  -1  18  -3  303.07   26.20
   1  18   3  302.27   22.70
  -1  18  -3  306.97   37.30
  -1 -18  -3  257.17   35.20
   1 -18   3  330.47   31.70
   1  18   4   -4.20    3.50
   1  18   4    2.80    7.10
  -1  18  -4   -1.50    5.00
  -1  18  -4    1.50   22.00
  -1 -18  -4   -1.00   17.40
   1 -18   4    8.90   13.80
   1  18   5  416.76   26.40
  -1  18  -5  376.26   29.30
  -1  18  -5  464.45   32.90
  -1  18  -5  426.56   38.60
   1 -18   5  395.36   32.30
  -1 -18  -5  460.85   46.30
  -1 -18  -5  401.86   21.90
   1  18   6   12.90    5.20
  -1  18  -6   -6.60    9.90
  -1  18  -6   -1.30   18.50
   1  18   6   -0.30    7.60
  -1  18  -6   10.30    5.80
  -1  18  -6   -1.80    1.70
  -1 -18  -6   16.30   22.80
   1 -18   6   12.10   14.20
  -1 -18  -6    1.10    5.20
   1  18   7  151.88   18.60
  -1  18  -7  158.28   15.20
  -1  18  -7  167.68   25.50
  -1 -18  -7  143.29   12.10
   1 -18   7  157.78   23.60
  -1 -18  -7  166.28   33.60
  -1  18  -8    7.00   12.60
   1  18   8   -4.60    7.60
   1  18   8   -2.60    3.60
  -1  18  -8    2.00    3.60
  -1 -18  -8    6.40   24.40
   1 -18   8    8.80   13.50
  -1  18  -9   -4.10    5.00
   1  18   9   22.80   11.30
  -1  18  -9    3.30   12.40
   1  18   9    3.00    3.70
   1  18  10    4.60    9.30
  -1  18 -10   14.10    6.40
  -1  18 -10    7.00   16.30
  -1  18 -11  164.48   29.60
   1  18  11  206.58   23.20
  -1  19  10   33.30   13.30
   1  19 -10   49.90   19.80
   1  19  -9   23.90   14.90
  -1  19   9   -0.90    5.20
  -1  19   9  -10.10    9.80
   1  19  -8   25.50   14.80
  -1  19   8   44.10   12.90
  -1  19   7    0.70    9.10
  -1  19   7    1.80    4.80
   1  19  -7   -5.90   11.20
   1 -19  -7    0.00   24.20
  -1 -19   7   -9.60   13.50
  -1  19   6   49.40   12.40
   1  19  -6   23.40    8.90
   1  19  -6   19.00   11.50
  -1  19   6   28.80    6.80
  -1 -19   6   49.80   16.00
   1 -19  -6   47.70   25.50
  -1  19   5    6.30    9.60
   1  19  -5   16.90    6.90
  -1  19   5   10.80    5.00
   1  19  -5   30.00   21.70
   1  19  -5   -1.80    9.20
  -1 -19   5   20.10   15.90
   1  19  -4   66.79   22.80
   1  19  -4   43.10    9.00
   1  19  -4   48.60   14.50
  -1  19   4   33.60    7.40
  -1  19   4   49.30   12.70
  -1 -19   4   66.19   18.70
   1 -19  -4   51.79   24.40
  -1  19   3    4.50    5.20
   1  19  -3    1.30   21.50
   1  19  -3    2.30    5.40
   1  19  -3    5.80    9.00
  -1  19   3   10.50    8.40
   1 -19  -3   13.20   18.90
  -1 -19   3   17.00   15.00
   1  19  -2  122.89   18.40
  -1  19   2  129.99   19.80
   1  19  -2  104.89   12.50
  -1  19   2   98.99   11.40
  -1 -19   2  116.39   23.60
   1 -19  -2  106.99   26.60
  -1  19   1   -3.40    7.80
  -1  19   1   -2.70    4.40
   1  19  -1    4.10    5.20
   1  19  -1    6.40    7.90
   1 -19  -1   -5.00   16.00
  -1 -19   1   -7.40   16.00
  -1  19   0    1.40    4.70
   1  19   0    1.60    4.80
  -1  19   0   -1.10    8.70
   1  19   0   -3.10    7.50
  -1 -19   0   -5.90   16.30
   1 -19   0   13.90   16.80
   1  19   1    3.40    8.00
  -1  19  -1    7.10    8.90
  -1  19  -1   -2.90    5.10
   1  19   1   -1.50    4.90
   1 -19   1    4.60   16.00
  -1 -19  -1   -0.40   17.20
   1  19   2   48.70    8.50
  -1  19  -2   53.19    9.30
   1  19   2   54.09   12.70
  -1  19  -2   63.79   16.40
  -1 -19  -2   15.50   19.00
   1 -19   2   35.20   18.70
   1  19   3    8.60    8.20
   1  19   3   10.80    5.70
  -1  19  -3   -2.50    5.00
  -1  19  -3    5.70   10.10
   1 -19   3    1.00   16.20
  -1 -19  -3   19.10   19.90
  -1  19  -4  147.99   23.20
  -1  19  -4  106.79   13.10
  -1  19  -4  114.59   28.40
   1  19   4  125.89   11.30
   1  19   4  115.49   17.60
   1 -19   4  131.89   24.40
  -1 -19  -4  122.19   30.90
  -1  19  -5   13.40    6.70
  -1  19  -5  -22.20   22.80
  -1  19  -5    3.20   10.40
   1  19   5    2.50    7.90
   1  19   5   16.30    5.70
   1 -19   5   16.00   16.10
  -1 -19  -5   -2.00   23.90
   1  19   6   51.09   12.60
  -1  19  -6  100.89   20.40
  -1  19  -6   45.60   11.70
   1 -19   6   45.00   19.00
  -1 -19  -6   70.79   28.60
  -1  19  -7    7.00   13.60
   1  19   7    0.20    8.60
   1  19   7    2.40    4.70
  -1 -19  -7    5.30   25.50
   1 -19   7   -2.80   15.50
   1  19   8   -1.60    4.90
   1  19   8   15.90    9.50
  -1  19  -8    5.20   13.50
   1  19   9   10.70   10.00
  -1  19  -9    1.40   14.10
   1  19  10    6.90   10.60
  -1  19 -10   -5.60   15.90
   1  20  -9   21.20   16.50
  -1  20   9   41.00   14.50
  -1  20   8    9.30   11.30
   1  20  -8   -6.70   13.40
  -1  20   8    1.80    6.20
  -1  20   7   -3.80    5.50
  -1  20   7   15.50   11.30
   1  20  -7   21.60   15.10
  -1  20   6    7.50   10.50
  -1  20   6   14.10    5.90
   1  20  -6   -3.70   11.40
   1 -20  -6  -39.10   26.70
  -1 -20   6   21.60   18.30
  -1  20   5  406.06   21.10
   1  20  -5  414.56   32.50
  -1  20   5  397.76   29.20
  -1 -20   5  383.46   35.70
   1 -20  -5  375.26   48.80
   1  20  -4   -0.90    9.80
   1  20  -4   12.20    6.90
  -1  20   4    1.60    9.30
  -1  20   4   -0.10    5.30
  -1 -20   4   14.30   18.10
   1 -20  -4   -7.50   22.50
   1  20  -3  751.62   40.10
  -1  20   3  796.42   40.80
  -1  20   3  780.82   30.90
   1  20  -3  711.13   32.10
  -1 -20   3  726.33   47.70
   1 -20  -3  686.03   61.29
   1  20  -2    0.30    9.00
   1  20  -2    6.20    6.30
  -1  20   2   10.20    6.60
  -1  20   2    1.00    9.50
   1 -20  -2    8.40   20.60
  -1 -20   2   -3.20   17.60
  -1  20   1  194.68   16.20
  -1  20   1  185.58   21.20
   1  20  -1  174.68   21.40
  -1 -20   1  205.08   32.70
   1 -20  -1  180.38   32.00
  -1  20   0   19.10   10.70
   1  20   0   13.90    7.00
   1  20   0   27.20   11.50
   1 -20   0    8.30   19.10
  -1 -20   0   41.80   20.60
  -1  20  -1   10.80    6.70
  -1  20  -1   29.30   11.90
   1  20   1    6.80    8.70
   1  20   1   16.80    7.00
   1 -20   1   -1.30   18.30
  -1 -20  -1   25.10   22.30
   1  20   2   42.50   12.80
  -1  20  -2    8.40   11.10
   1  20   2   15.90    6.20
  -1  20  -2   19.00    7.40
   1 -20   2   13.40   18.30
  -1 -20  -2   -7.20   20.70
  -1  20  -3  618.64   38.00
  -1  20  -3  527.85   27.20
   1  20   3  504.85   24.20
   1  20   3  566.54   32.60
  -1 -20  -3  576.94   60.49
   1 -20   3  502.95   42.90
   1  20   4   -4.50    8.30
  -1  20  -4   -7.80   10.00
   1  20   4    8.10    5.60
  -1 -20  -4   -1.30   23.10
   1 -20   4  -36.00   17.60
   1  20   5  558.94   32.30
  -1  20  -5  526.75   37.40
   1  20   5  510.25   23.20
   1 -20   5  534.35   40.60
  -1 -20  -5  573.34   55.39
  -1  20  -6    9.20   14.10
   1  20   6   -7.90    9.10
   1  20   6    4.40    5.40
   1 -20   6  -21.10   19.20
   1  20   7  352.66   27.20
  -1  20  -7  353.76   34.80
  -1  20  -8    8.10   15.30
   1  20   8    5.30   10.30
   1  21  -7  -14.60   12.70
  -1  21   7   -0.60    7.40
  -1  21   7   17.70   13.60
  -1  21   6   -4.80    5.70
   1  21  -6   -9.70   12.50
  -1  21   6   -4.70   11.10
  -1  21   5   10.70   12.10
  -1  21   5   19.60    7.50
   1  21  -5   16.40   13.00
   1  21  -4    7.60   11.40
  -1  21   4    5.80   11.20
  -1  21   4    4.90    6.40
   1 -21  -4   11.10   26.70
  -1 -21   4   -8.90   20.30
  -1  21   3   -8.20    9.70
   1  21  -3    7.50   10.50
   1 -21  -3  -23.40   23.10
  -1 -21   3   -5.00   20.90
  -1  21   2    1.80    6.10
   1  21  -2    6.80    7.20
  -1  21   2   -2.60   10.40
   1  21  -2    8.60   11.00
  -1 -21   2  -13.10   21.10
   1 -21  -2   11.70   24.40
   1  21  -1   -8.90    9.50
  -1  21   1    2.40    6.20
   1  21  -1    8.30    6.70
  -1  21   1    2.70   10.70
   1 -21  -1  -11.00   22.70
  -1 -21   1   -8.90   21.30
  -1  21   0   -3.50    6.10
   1  21   0    0.10    6.20
  -1  21   0   -9.00    9.40
   1  21   0   -0.30    9.90
  -1 -21   0    8.10   22.50
   1 -21   0   23.30   22.60
  -1  21  -1   -1.50   10.70
   1  21   1    8.10   10.20
   1  21   1    5.30    6.60
  -1  21  -1    1.60    6.50
  -1 -21  -1  -20.60   22.30
   1 -21   1  -12.10   22.00
  -1  21  -2    9.00   11.70
   1  21   2    3.70    6.60
   1  21   2    6.50    9.00
  -1 -21  -2    1.80   24.20
   1 -21   2    5.40   22.50
   1  21   3    4.80    6.80
  -1  21  -3    3.60   12.50
   1  21   3    7.80   10.20
  -1 -21  -3   11.50   26.30
   1 -21   3   -2.00   20.50
   1  21   4   -1.80   10.00
  -1  21  -4   10.80   12.70
   1  21   4   -0.60    6.60
   1 -21   4   -5.90   20.80
  -1 -21  -4   -5.20   26.80
   1  21   5   28.60   12.50
   1  21   5    8.80    7.00
  -1  21  -5   11.50   13.70
   1  21   6   -4.90    9.90
  -1  21  -6   17.00   15.80
   1  21   6    2.50    6.80
  -1  22   3  549.25   27.50
   1  22  -3  586.84   38.00
  -1  22   3  552.14   36.30
  -1 -22   3  551.14   50.09
  -1  22   2   -6.10   11.70
   1  22  -2    2.90   11.50
  -1  22   2   10.50    8.00
   1 -22  -2  -16.80   27.60
  -1 -22   2   10.10   26.70
   1  22  -1  159.18   23.30
  -1  22   1  157.08   25.60
   1 -22  -1  119.89   34.10
  -1 -22   1  108.39   31.70
   1  22   0    8.60   11.40
  -1  22   0   -0.80   11.40
   1 -22   0   31.20   30.80
   1  22   1    6.60    7.40
  -1  22  -1   -2.90   12.30
   1  22   1   12.20   11.70
   1 -22   1   36.00   41.30
  -1 -22  -1   19.40   26.50
  -1  22  -2   13.80   13.10
   1  22   2   17.00    8.40
   1  22   2   21.00   12.20
  -1 -22  -2  -16.90   29.00
   1 -22   2   23.70   27.30
   1 -22   3  228.18   36.10
   2   0 -20   20.10   26.50
  -2   0  19    0.70    3.60
   2   0 -19    4.30   21.00
  -2   0  17   -2.20    3.50
   2   0 -17    7.50   17.00
   2   0 -17    0.30    5.30
  -2   0  17    0.90    2.80
   2   0 -17   11.10   15.40
   2   0 -16 1027.90   51.99
   2   0 -16 1016.00   36.70
  -2   0  16  956.80   27.60
  -2   0  16  956.70   27.30
  -2   0  15   -1.30    2.10
  -2   0  15   -1.30    2.30
   2   0 -15    0.50    4.00
   2   0 -15   -3.60   10.70
   2   0 -14  185.18   21.80
  -2   0  14  165.78   21.50
  -2   0  14  320.27   42.20
  -2   0  14  161.78    9.00
   2   0 -14  172.58   13.30
  -2   0  14  170.48    9.30
  -2   0  13   -1.90    9.70
  -2   0  13    0.80    8.50
  -2   0  13   -0.30    1.70
  -2   0  13    1.20    3.60
   2   0 -13    2.20    7.80
  -2   0  13   -0.90    1.80
   2   0 -13    2.40    3.60
  -2   0  12  206.38    9.70
  -2   0  12  197.78   12.60
  -2   0  12  184.58   19.20
  -2   0  12  195.38    9.50
   2   0 -12  192.08   12.80
  -2   0  12  200.18   20.50
   2   0 -12  203.48   20.10
  -2   0  11    3.30    6.20
  -2   0  11    3.70    5.60
  -2   0  11   -1.30    2.40
   2   0 -11   -0.20    2.30
  -2   0  11    0.90    1.30
   2   0 -11    4.40    5.60
   2   0 -10   57.49   10.60
   2   0 -10   69.69    5.00
  -2   0  10   56.69    4.80
  -2   0  10   46.40   11.30
  -2   0  10   64.39    6.60
  -2   0  10   39.00    8.60
  -2   0  10   56.99    4.60
   2   0 -10   58.79    6.50
  -2   0   9   -1.00    4.30
  -2   0   9    0.90    1.90
  -2   0   9   -0.30    1.10
   2   0  -9    0.10    1.50
  -2   0   9   -3.60    4.00
   2   0  -9    0.60    1.00
   2   0  -9    2.10    4.00
   2   0  -8 4038.80   84.39
  -2   0   8 4045.40   79.99
   2   0  -8 4016.90   79.99
  -2   0   8 4089.69   84.59
   2   0  -8 4054.59   95.59
  -2   0   8 4105.59   95.29
   2   0  -7   -0.10    0.70
  -2   0   7    0.50    1.50
   2   0  -7    2.00    3.10
  -2   0   7    0.40    3.10
  -2   0   7    0.20    2.80
  -2   0   7   -0.40    0.70
   2   0  -6 2644.14   62.59
  -2   0   6 2565.64   51.89
   2   0  -6 2559.94   54.49
  -2   0   6 2631.44   62.79
   2   0  -6 2526.65   51.69
  -2   0   6 2524.15   54.39
  -2   0   6 2533.45   61.79
  -2   0   5   -0.90    2.00
  -2   0   5   -0.90    0.60
   2   0  -5    0.00    0.60
   2   0  -5    1.30    1.00
   2   0  -5   -1.10    1.80
  -2   0   5   -0.50    2.00
  -2   0   5   -0.40    0.50
   2   0  -4 2540.75   56.39
  -2   0   4 2559.14   49.90
   2   0  -4 2515.95   49.80
  -2   0   4 2571.34   56.49
  -2   0   4 2532.75   49.90
   2   0  -4 2490.25   50.99
  -2   0   4 2562.64   57.09
  -2   0   4 2501.65   51.19
  -2   0   3    0.60    0.60
  -2   0   3    0.50    0.60
   2   0  -3    0.20    0.50
   2   0  -3   -0.50    1.10
  -2   0   3   -0.10    0.40
  -2   0   3   -0.80    1.20
   2   0  -2 2697.33   51.79
   2   0  -2 2674.33   55.39
  -2   0   2 2709.63   55.79
  -2   0   2 2727.93   51.89
  -2   0   1    0.50    0.80
   2   0  -1   -0.30    0.70
   2   0  -1    0.30    0.40
   2   0  -1   -0.10    0.30
  -2   0   1    0.10    0.30
  -2   0   1   -0.10    0.30
   2   0  -1    0.40    0.50
   2   0   1   -0.20    0.40
  -2   0  -1    0.10    0.30
  -2   0  -1    0.10    1.00
  -2   0  -1    0.50    0.50
   2   0   1    0.10    0.30
   2   0   1   -1.00    0.90
  -2   0  -1    0.40    0.60
  -2   0  -2 5112.79  100.39
   2   0   2 5290.87  105.49
  -2   0  -2 5064.19  104.29
  -2   0  -3   -0.30    0.60
  -2   0  -3    2.50    2.00
   2   0   3   -1.30    1.10
  -2   0  -3    0.50    0.40
   2   0   3    0.10    0.70
  -2   0  -3   -0.60    1.00
  -2   0  -3   -0.90    1.90
   2   0   3    0.20    0.40
  -2   0  -4   28.80    3.20
  -2   0  -4   20.80    4.00
   2   0   4   24.10    1.90
   2   0   4   22.20    4.10
  -2   0  -4   25.10    1.90
  -2   0  -4   31.90    6.00
   2   0   4   19.50    2.90
  -2   0  -4   33.10    6.80
   2   0   5    1.70    1.20
  -2   0  -5   -1.00    3.10
   2   0   5   -0.60    2.10
  -2   0  -5    0.20    3.00
  -2   0  -5   -1.80    2.10
  -2   0  -5    0.70    0.70
   2   0   5   -0.60    0.50
  -2   0  -5   -0.60    0.90
  -2   0  -6 3087.49   76.39
   2   0   6 3053.29   71.59
   2   0   6 3098.49   65.19
  -2   0  -6 3055.39   59.49
  -2   0  -6 3069.29   79.39
  -2   0  -6 3027.80   65.59
   2   0   6 3072.19   59.49
  -2   0  -6 3014.00   73.49
  -2   0  -7   -1.50    3.90
  -2   0  -7    0.90    4.80
   2   0   7    0.10    3.70
  -2   0  -7   -0.30    0.70
  -2   0  -7    2.60    3.50
   2   0   7   -0.30    1.70
  -2   0  -7    1.40    1.80
   2   0   7   -0.30    0.80
  -2   0  -8 1778.32   37.90
   2   0   8 1816.92   38.00
  -2   0  -8 1859.81   45.60
   2   0   8 1857.61   52.59
  -2   0  -8 1803.22   55.89
  -2   0  -8 1755.22   54.19
  -2   0  -8 1853.81   59.69
   2   0   8 1747.73   44.10
   2   0   9   -2.20    1.70
  -2   0  -9   -3.60    5.20
  -2   0  -9   -1.50    1.70
  -2   0  -9   -0.80    0.80
   2   0   9    0.30    4.90
  -2   0  -9   -0.90    5.40
   2   0   9   -0.60    1.00
   2   0  10 4097.39   78.69
  -2   0 -10 4048.09   78.89
  -2   0 -10 3920.91  102.29
   2   0  10 3969.90   99.09
  -2   0 -10 3989.10   88.89
  -2   0 -10 3990.20  109.29
  -2   0 -10 4004.90  103.89
   2   0  10 3860.41   87.29
  -2   0 -11    0.40    7.30
  -2   0 -11   -1.70    2.80
  -2   0 -11   -0.70    1.10
  -2   0 -11    0.70    6.10
   2   0  11    0.20    3.00
  -2   0 -11    7.20    8.20
   2   0  11   -2.20    7.40
   2   0  11   -1.70    1.30
   2   0  12 1140.09   27.20
  -2   0 -12 1116.69   27.40
  -2   0 -12 1110.29   48.80
  -2   0 -12 1237.58   55.59
  -2   0 -12 1074.29   46.00
   2   0  12 1024.50   42.00
   2   0  12 1162.58   46.60
  -2   0 -13   -0.20    1.60
  -2   0 -13    0.00   11.00
   2   0  13    1.10    1.70
  -2   0 -13   -7.20   11.10
  -2   0 -13    4.70    3.80
   2   0  13    0.50    8.80
  -2   0 -14  479.65   24.10
   2   0  14  490.85   16.90
  -2   0 -14  517.45   17.40
  -2   0 -14  521.55   39.60
  -2   0 -14  497.15   36.00
   2   0  14  492.75   34.00
  -2   0 -15    4.00    5.20
  -2   0 -15    3.80   15.30
   2   0  15   17.80   15.20
   2   0  15   -0.10    2.10
  -2   0 -15    3.20   16.70
   2   0  17   -0.10    2.50
   2   0  17    2.90    5.00
  -2   0 -17   -1.80    6.50
  -2   0 -17   21.80   21.40
  -2   0 -18  527.65   52.39
  -2   0 -19    2.50   28.80
   2   1 -20  -18.70   23.90
  -2  -1  20    2.00    6.50
   2  -1 -20   -3.00   25.90
  -2   1  19   -1.30    3.20
  -2  -1  19   -0.90    4.00
   2  -1 -19    8.90   22.00
   2   1 -18   98.79   23.80
   2   1 -18   91.29   22.20
  -2  -1  18   70.49    8.90
   2  -1 -18  122.49   26.30
   2  -1 -18  130.79   14.20
   2   1 -17   32.40    8.30
   2   1 -17   32.80   16.30
   2  -1 -17   22.30    7.60
  -2  -1  17   35.00    5.60
   2  -1 -17   39.60   21.80
  -2  -1  17   30.70    5.50
   2  -1 -17    8.40   22.10
  -2   1  16  297.37   12.50
   2   1 -16  203.08   25.60
   2   1 -16  270.87   18.20
   2   1 -16  276.57   28.70
  -2   1  16  293.07   12.00
  -2  -1  16  306.57   13.80
  -2  -1  16  304.37   14.00
   2  -1 -16  245.08   30.00
   2  -1 -16  267.67   17.80
   2   1 -15   60.69   15.30
   2   1 -15   58.79   15.60
  -2   1  15   57.19   16.90
   2   1 -15   76.59   10.40
  -2   1  15   57.09    5.60
  -2   1  15   52.59    5.10
  -2  -1  15   53.49    6.30
   2  -1 -15   36.30   14.80
   2  -1 -15   58.89    9.70
  -2  -1  15   60.69    6.40
  -2   1  14   47.30   14.90
  -2   1  14   50.39    5.10
   2   1 -14   53.09    8.80
  -2   1  14   54.59   15.80
  -2   1  14   50.09    5.10
   2   1 -14   65.89   14.40
   2   1 -14   29.10   11.30
  -2  -1  14   53.39    5.70
  -2  -1  14   53.19    6.00
   2  -1 -14   47.00   14.20
   2  -1 -14   55.49    9.40
  -2   1  13   12.80    3.00
  -2   1  13   20.80   10.80
   2   1 -13   23.50    9.20
  -2   1  13    9.10    4.60
  -2   1  13    8.30    8.70
  -2   1  13   13.70    3.30
   2   1 -13   10.60    3.10
  -2  -1  13   -1.30    3.60
  -2  -1  13   31.80   12.70
  -2  -1  13   19.70    3.90
   2  -1 -13   21.50    9.80
   2  -1 -13   20.90    5.50
  -2  -1  13   13.30    3.10
   2   1 -12   23.20    8.30
  -2   1  12   21.20   14.60
  -2   1  12   20.50    3.90
  -2   1  12   11.50    8.60
  -2   1  12   14.10    2.90
  -2   1  12   18.20    4.40
   2   1 -12   18.90    3.80
   2   1 -12   17.90    5.00
  -2  -1  12   23.10    9.90
  -2  -1  12   15.70    3.40
   2  -1 -12   12.80    4.40
  -2  -1  12   13.60    7.70
  -2  -1  12   16.20    4.80
   2  -1 -12   14.50    8.50
  -2   1  11    7.60    3.90
   2   1 -11    4.30    1.80
   2   1 -11    3.20    2.50
   2   1 -11    4.60    6.30
  -2   1  11    8.30    7.80
  -2   1  11    6.30    7.50
  -2   1  11    8.90    2.20
  -2   1  11    5.50    1.80
  -2  -1  11    9.40    3.10
  -2  -1  11    5.10    6.90
  -2  -1  11    4.70    2.10
   2  -1 -11    7.30    3.00
   2  -1 -11    6.70    6.80
  -2   1  10   30.90    3.40
  -2   1  10   36.80    3.40
  -2   1  10   35.70    9.70
  -2   1  10   26.30    5.10
  -2   1  10   30.00    9.50
   2   1 -10   39.70    6.60
   2   1 -10   13.50    6.50
  -2  -1  10   34.20    8.30
  -2  -1  10   31.90    4.50
   2  -1 -10   32.30    5.50
   2  -1 -10   17.80    7.90
  -2  -1  10   33.60    6.00
  -2  -1  10   33.50   11.20
   2   1  -9  243.38   12.00
   2   1  -9  237.58    9.90
  -2   1   9  228.78    8.90
   2   1  -9  250.77   16.60
  -2   1   9  223.48   16.80
  -2   1   9  235.08    8.80
  -2   1   9  231.78   11.70
  -2   1   9  224.98   17.70
  -2  -1   9  215.38   16.10
  -2  -1   9  222.48    9.50
   2  -1  -9  238.28   11.80
  -2  -1   9  219.48   15.30
  -2  -1   9  204.98   11.20
   2  -1  -9  247.38   18.30
  -2   1   8  256.57   11.60
  -2   1   8  258.27    9.20
   2   1  -8  254.57   16.70
   2   1  -8  267.37   10.10
  -2   1   8  247.68    8.90
   2   1  -8  230.88   15.00
  -2   1   8  252.27   16.70
  -2   1   8  227.58   17.10
   2   1  -8  253.77   11.70
   2  -1  -8  227.58   17.10
  -2  -1   8  242.98   15.80
  -2  -1   8  280.77   10.20
  -2  -1   8  261.27   11.90
   2  -1  -8  256.17   11.50
  -2  -1   8  213.48   14.30
  -2   1   7  348.17   18.10
  -2   1   7  330.57   19.10
   2   1  -7  323.57   14.80
  -2   1   7  307.77    9.90
   2   1  -7  325.37   16.20
  -2   1   7  316.77   10.20
   2   1  -7  317.67   11.00
   2   1  -7  304.67   17.30
  -2  -1   7  324.57   11.00
   2  -1  -7  306.87   14.20
  -2  -1   7  325.07   17.10
  -2  -1   7  339.37   16.40
   2  -1  -7  335.67   18.90
  -2  -1   7  347.87   13.00
  -2   1   6   97.49    9.00
   2   1  -6   92.49    7.80
  -2   1   6  110.29    4.90
   2   1  -6  103.29    9.00
  -2   1   6   84.09    9.20
  -2   1   6   98.19    6.00
   2   1  -6   99.89    6.10
   2   1  -6  105.69    5.40
  -2   1   6  103.79    4.90
   2  -1  -6   88.79    9.50
  -2  -1   6  102.59    8.80
  -2  -1   6   83.49    7.50
  -2  -1   6  107.19    5.50
  -2  -1   6   94.89    6.10
   2  -1  -6  115.79    6.50
  -2   1   5  539.95   13.80
   2   1  -5  559.44   15.80
   2   1  -5  516.55   19.70
  -2   1   5  556.94   22.30
  -2   1   5  566.84   15.70
  -2   1   5  540.25   13.50
   2   1  -5  563.24   14.70
   2   1  -5  558.94   18.20
   2  -1  -5  546.35   15.50
  -2  -1   5  568.44   15.90
  -2  -1   5  546.35   14.70
   2  -1  -5  546.95   21.70
  -2  -1   5  547.35   18.30
  -2  -1   5  546.15   19.70
   2   1  -4   11.20    2.00
  -2   1   4   11.70    1.50
   2   1  -4   12.80    2.00
   2   1  -4   11.80    3.00
   2   1  -4   10.50    2.40
  -2   1   4   13.30    2.10
  -2   1   4    9.50    3.30
  -2   1   4   10.50    1.50
   2  -1  -4   12.30    2.10
   2  -1  -4    9.30    1.50
  -2  -1   4   10.60    1.90
  -2  -1   4   11.60    2.70
  -2  -1   4    9.10    2.50
  -2  -1   4   12.50    1.90
   2  -1  -4    6.90    2.90
   2   1  -3  138.59    7.20
   2   1  -3  144.09    5.60
  -2   1   3  150.98    5.60
  -2   1   3  142.19    4.90
   2   1  -3  146.89    6.20
  -2   1   3  144.99    9.10
  -2  -1   3  153.28    7.40
  -2  -1   3  150.48    5.70
   2  -1  -3  148.29    5.50
   2  -1  -3  135.39    4.90
   2  -1  -3  146.19    8.80
  -2  -1   3  147.39    6.40
  -2  -1   3  153.88    5.60
  -2   1   2   20.60    1.70
   2   1  -2   22.30    1.80
   2   1  -2   23.60    1.80
  -2   1   2   20.90    1.60
   2   1  -2   14.00    1.80
  -2   1   2   19.90    3.80
   2  -1  -2   20.40    1.60
   2  -1  -2   15.10    3.10
   2  -1  -2   20.80    1.70
  -2  -1   2   13.70    1.80
  -2  -1   2   20.10    1.70
  -2  -1   2   21.20    2.20
  -2  -1   2   21.00    1.70
  -2   1   1  147.59    7.50
  -2   1   1  148.19    4.50
   2   1  -1  138.09    4.50
  -2   1   1  133.69    4.40
   2   1  -1  142.19    4.50
  -2   1   1  132.39    5.50
   2   1  -1  143.09    6.10
  -2  -1   1  138.99    4.50
   2  -1  -1  139.89    4.50
  -2  -1   1  140.49    4.60
   2  -1  -1  131.19    7.00
  -2  -1   1  142.89    6.10
   2  -1  -1  137.49    4.40
   2  -1  -1  113.59    5.50
  -2   1   0   15.80    2.40
  -2   1   0   13.60    1.20
   2   1   0   15.10    1.40
   2   1   0    8.10    2.10
  -2   1   0   15.40    1.40
   2   1   0   13.60    1.10
  -2   1   0    8.60    2.30
   2   1   0   11.70    0.90
   2  -1   0   14.60    1.30
   2  -1   0   12.70    1.30
  -2  -1   0   11.70    0.90
   2  -1   0   11.30    2.50
  -2  -1   0   13.80    1.10
  -2  -1   0    7.00    2.00
  -2  -1   0   17.50    1.50
  -2  -1   0   12.80    1.30
  -2   1  -1  775.42   17.80
   2   1   1  785.32   17.60
   2   1   1  775.82   15.90
   2   1   1  801.62   17.90
  -2   1  -1  789.02   22.00
  -2   1  -1  783.92   17.10
   2  -1   1  762.02   16.90
  -2  -1  -1  835.82   18.30
  -2  -1  -1  777.52   17.70
  -2  -1  -1  774.82   15.80
  -2  -1  -1  810.62   23.60
   2  -1   1  825.62   17.90
  -2  -1  -1  828.12   23.40
   2  -1   1  793.72   22.10
  -2   1  -2    0.00    0.50
  -2   1  -2   -1.10    1.40
   2   1   2   -0.20    0.60
  -2   1  -2    0.20    0.80
   2   1   2   -0.60    0.80
  -2   1  -2    0.50    0.60
   2   1   2    0.10    0.20
  -2  -1  -2    0.10    0.60
   2  -1   2    0.60    0.70
  -2  -1  -2    2.20    1.90
  -2  -1  -2    0.30    1.00
  -2  -1  -2    0.40    0.30
  -2  -1  -2    1.40    1.90
   2  -1   2   -0.30    0.80
   2  -1   2    0.50    1.40
   2  -1   2   -0.10    0.50
   2   1   3  936.41   22.30
  -2   1  -3  922.51   20.60
  -2   1  -3  935.31   26.10
  -2   1  -3  949.01   22.70
   2   1   3  924.11   18.30
  -2   1  -3  946.21   27.80
  -2  -1  -3  961.10   31.00
   2  -1   3  930.21   20.50
  -2  -1  -3  914.21   25.40
  -2  -1  -3  957.20   22.60
   2  -1   3  963.10   28.60
   2  -1   3  948.61   25.70
  -2  -1  -3  907.71   18.50
  -2   1  -4    3.70    1.40
  -2   1  -4    7.20    3.40
   2   1   4    9.30    3.10
   2   1   4    5.50    3.60
  -2   1  -4   10.10    1.70
  -2   1  -4    4.40    2.70
  -2   1  -4    5.60    2.30
   2   1   4    6.70    0.80
   2   1   4    4.00    1.60
  -2  -1  -4    6.60    1.00
  -2  -1  -4    7.80    2.80
   2  -1   4    8.00    1.50
   2  -1   4    5.60    1.70
   2  -1   4    3.90    1.90
  -2  -1  -4    4.80    1.60
  -2  -1  -4    3.60    3.30
   2   1   5  854.81   22.30
  -2   1  -5  821.02   30.00
  -2   1  -5  801.22   22.30
   2   1   5  780.62   30.40
   2   1   5  799.82   26.20
  -2   1  -5  813.92   28.10
   2   1   5  801.62   17.00
  -2   1  -5  791.72   19.20
  -2  -1  -5  843.02   32.70
  -2  -1  -5  836.52   27.50
   2  -1   5  801.12   19.20
   2  -1   5  806.02   22.10
  -2  -1  -5  795.22   17.00
  -2  -1  -5  853.81   22.60
   2  -1   5  823.82   26.70
  -2   1  -6   18.70    3.30
  -2   1  -6   16.70    6.70
   2   1   6   14.60    4.20
  -2   1  -6   17.40    6.20
  -2   1  -6    8.90    4.20
  -2   1  -6   18.50    2.30
   2   1   6   13.50    2.80
   2   1   6    9.60    4.60
   2   1   6   17.50    1.60
  -2  -1  -6   16.40    3.70
   2  -1   6   16.20    3.20
  -2  -1  -6   18.10    1.70
   2  -1   6   18.10    2.20
   2  -1   6   11.40    3.20
  -2  -1  -6   17.60    6.40
  -2  -1  -6    8.90    3.90
   2   1   7  296.77   16.80
  -2   1  -7  298.27   17.90
  -2   1  -7  292.17   10.00
   2   1   7  291.87    8.30
  -2   1  -7  294.67   19.80
   2   1   7  306.27   12.90
  -2   1  -7  297.37   13.20
  -2   1  -7  309.97   18.30
  -2  -1  -7  282.27   23.50
   2  -1   7  297.17    9.90
   2  -1   7  309.57   17.10
  -2  -1  -7  305.07   13.30
   2  -1   7  295.67   12.90
  -2  -1  -7  307.67   18.00
  -2  -1  -7  291.87    8.40
   2   1   8   65.29   11.70
   2   1   8   54.49    5.70
   2   1   8   65.59    3.50
  -2   1  -8   61.89    4.40
  -2   1  -8   38.80    8.50
  -2   1  -8   59.29    6.20
  -2  -1  -8   61.49    3.50
  -2  -1  -8   56.29    9.50
   2  -1   8   58.49    4.20
  -2  -1  -8   53.39   12.00
   2  -1   8   62.69   10.40
   2  -1   8   58.79    5.90
  -2  -1  -8   58.09    6.10
  -2   1  -9  237.78   18.60
  -2   1  -9  243.28   20.20
  -2   1  -9  222.38   12.70
   2   1   9  239.78    7.90
   2   1   9  255.27   18.20
  -2   1  -9  232.78    9.30
  -2   1  -9  238.58   18.40
   2   1   9  246.38   12.80
   2  -1   9  236.68    9.40
  -2  -1  -9  240.08   20.20
  -2  -1  -9  231.98   12.80
   2  -1   9  242.18   17.70
   2  -1   9  238.18   12.60
  -2  -1  -9  238.28    8.00
  -2  -1  -9  269.57   22.40
  -2  -1  -9  240.28   18.60
  -2   1 -10  182.98    8.50
   2   1  10  192.68    7.10
   2   1  10  195.18   17.30
  -2   1 -10  181.08   11.90
  -2   1 -10  184.68   19.20
   2   1  10  202.18   12.20
  -2   1 -10  134.89   15.50
  -2   1 -10  212.38   18.80
  -2  -1 -10  190.08   12.20
   2  -1  10  173.28   16.40
  -2  -1 -10  165.68   18.10
  -2  -1 -10  180.18   20.00
   2  -1  10  198.78   12.00
   2  -1  10  201.08    8.70
  -2  -1 -10  187.38    7.10
   2   1  11   40.50    3.30
  -2   1 -11   43.30   12.50
  -2   1 -11   54.89    8.30
   2   1  11   56.59    8.40
   2   1  11   46.90   11.90
  -2   1 -11   39.60    4.30
  -2   1 -11   31.00   10.00
  -2   1 -11   53.69   13.60
  -2  -1 -11   43.20   13.50
  -2  -1 -11   47.60    7.80
   2  -1  11   46.40    4.50
  -2  -1 -11   28.30   11.90
  -2  -1 -11   39.30    3.40
   2  -1  11   28.20    5.70
   2  -1  11   47.10   11.80
  -2   1 -12   79.29   16.40
  -2   1 -12   97.29    6.40
   2   1  12   87.39    9.30
   2   1  12   96.49    5.20
  -2   1 -12   96.69   16.00
   2   1  12  121.99   18.40
  -2   1 -12   88.99    9.80
   2  -1  12   83.69   14.10
  -2  -1 -12   64.29   15.40
  -2  -1 -12  102.39    5.50
  -2  -1 -12   81.19   17.10
   2  -1  12  103.19    6.60
   2   1  13   26.20    3.30
  -2   1 -13   29.90    4.50
   2   1  13   24.70   11.50
   2   1  13   34.70    3.50
  -2   1 -13   22.50   12.00
  -2   1 -13   30.80    6.40
  -2   1 -13   31.50   12.60
  -2   1 -13   29.00   13.60
   2  -1  13   35.60   12.40
  -2  -1 -13   41.60   15.10
   2  -1  13   30.10    4.30
  -2  -1 -13   35.70   15.30
  -2  -1 -13   15.60    5.20
  -2   1 -14   32.90   15.60
   2   1  14   39.00    3.60
  -2   1 -14   22.70   15.60
   2   1  14   38.40    3.50
  -2   1 -14   33.90    7.40
   2   1  14   11.40   12.20
  -2   1 -14   45.10    5.20
   2  -1  14   37.80    4.80
  -2  -1 -14   38.10   15.60
   2  -1  14   26.90   13.40
  -2  -1 -14   25.90    6.80
  -2  -1 -14   43.60   16.60
  -2   1 -15   21.20   15.70
   2   1  15   -2.50    1.70
   2   1  15   -0.30    1.70
  -2   1 -15    5.70    5.10
  -2   1 -15    7.40    2.80
  -2   1 -15    3.30   15.20
   2   1  15  -15.50   14.70
  -2  -1 -15    0.30    4.60
  -2  -1 -15    4.80   14.60
   2  -1  15   10.90    3.50
   2  -1  15  -18.30   12.50
  -2   1 -16   61.09   10.40
   2   1  16   19.00   18.10
  -2   1 -16   63.29   22.10
  -2  -1 -16   57.59   10.00
  -2  -1 -16   64.59   21.80
  -2   1 -17   36.40   20.90
  -2   1 -17   25.10    7.80
  -2  -1 -17   30.60    8.70
  -2  -1 -17   35.10   22.30
  -2   1 -18  125.69   31.50
  -2  -1 -18  122.89   33.10
  -2   1 -19   -7.40   28.20
  -2  -1 -19    4.50   30.00
   2   2 -20   29.80   25.60
   2  -2 -20  -30.90   26.50
   2   2 -19  -24.60   18.50
   2  -2 -19   11.70   23.70
  -2  -2  19    3.70    4.60
   2   2 -18  140.69   15.60
   2   2 -18   96.49   27.70
   2  -2 -18  176.08   32.20
  -2  -2  18  166.58   12.30
   2  -2 -18  158.28   16.00
   2   2 -17   31.80   15.40
   2   2 -17   32.70    8.20
   2   2 -17    8.00   15.40
  -2  -2  17   29.10    6.70
  -2  -2  17   28.20    5.30
   2  -2 -17   25.80    7.70
   2  -2 -17   21.00   17.40
   2   2 -16  630.74   35.00
  -2   2  16  586.24   43.20
  -2   2  16  635.04   18.90
   2   2 -16  635.94   38.00
   2   2 -16  620.54   27.80
  -2  -2  16  613.74   22.20
  -2  -2  16  616.84   22.10
   2  -2 -16  653.43   45.10
   2  -2 -16  622.44   27.50
  -2   2  15   55.79    5.20
  -2   2  15   79.29   19.50
   2   2 -15   53.09   13.50
  -2   2  15   72.49    7.40
   2   2 -15   62.49   10.10
   2   2 -15   60.59    6.70
   2   2 -15   60.19   14.30
  -2   2  15   69.59   17.90
  -2  -2  15   64.49    6.90
   2  -2 -15   61.79    9.60
  -2  -2  15   62.39    7.10
   2  -2 -15   54.69   18.40
   2   2 -14  326.67   25.10
   2   2 -14  286.47   22.40
   2   2 -14  301.17   13.90
  -2   2  14  314.57   11.70
  -2   2  14  330.57   28.60
  -2   2  14  327.17   30.20
   2   2 -14  302.87   17.50
   2  -2 -14  300.47   17.20
   2  -2 -14  327.57   29.90
  -2  -2  14  304.57   13.90
  -2   2  13   28.30    3.90
   2   2 -13   18.60    6.90
  -2   2  13   31.50    7.00
   2   2 -13   24.80    4.20
   2   2 -13   21.80    8.50
  -2   2  13   37.70   13.40
   2   2 -13   29.00    9.40
  -2   2  13   29.80    3.50
   2  -2 -13   37.20    7.10
  -2  -2  13   34.80    5.40
   2  -2 -13   23.90   11.90
  -2   2  12  133.69   19.30
   2   2 -12  131.49   10.60
   2   2 -12  131.69    8.40
   2   2 -12  152.68   15.80
  -2   2  12  127.19    6.70
  -2   2  12  128.19   17.90
  -2   2  12  133.49    7.10
  -2   2  12  143.99   10.80
   2  -2 -12  154.78   11.20
  -2  -2  12  143.99   18.40
  -2  -2  12  133.79   10.60
  -2  -2  12  137.69    8.40
   2  -2 -12  121.99   17.80
  -2   2  11    1.00    7.70
   2   2 -11    2.40    1.60
  -2   2  11    3.90    1.60
   2   2 -11    2.60    2.60
  -2   2  11    4.00    5.90
  -2   2  11    4.80    3.40
   2   2 -11   -1.10    5.50
   2   2 -11    0.10    5.20
  -2   2  11    3.60    1.50
   2  -2 -11    4.40    2.80
  -2  -2  11   10.90    7.90
   2  -2 -11   -1.00    6.60
  -2  -2  11    0.90    2.80
  -2  -2  11    4.70    2.20
  -2   2  10  295.57   21.00
   2   2 -10  298.67   18.30
  -2   2  10  293.17   22.80
   2   2 -10  286.47   20.70
   2   2 -10  307.67   14.60
  -2   2  10  297.07   10.10
  -2   2  10  294.47   10.40
  -2   2  10  320.07   14.70
   2   2 -10  306.87   12.40
  -2  -2  10  317.47   18.00
  -2  -2  10  302.77   14.40
   2  -2 -10  338.37   23.90
  -2  -2  10  307.47   21.00
   2  -2 -10  303.67   14.30
  -2  -2  10  305.57   12.40
  -2   2   9   32.20    8.70
  -2   2   9   49.60    9.10
   2   2  -9   46.60    6.20
   2   2  -9   38.30    8.50
   2   2  -9   42.90    5.10
   2   2  -9   34.30    7.00
  -2   2   9   42.00    3.30
  -2   2   9   45.40    6.10
  -2   2   9   48.70    3.70
   2  -2  -9   44.20    6.20
  -2  -2   9   48.80    6.80
  -2  -2   9   35.60    7.10
  -2  -2   9   47.90    4.60
   2  -2  -9   44.50    9.80
  -2  -2   9   36.40    7.30
   2   2  -8 2551.94   57.69
   2   2  -8 2544.65   67.59
  -2   2   8 2618.14   68.19
   2   2  -8 2647.14   62.59
  -2   2   8 2667.13   57.59
  -2   2   8 2544.35   51.69
  -2   2   8 2608.24   73.39
   2   2  -8 2574.54   54.99
  -2   2   8 2551.84   52.19
  -2  -2   8 2614.34   57.89
  -2  -2   8 2562.64   61.19
   2  -2  -8 2589.44   72.59
  -2  -2   8 2524.55   54.59
  -2  -2   8 2548.45   65.79
   2  -2  -8 2566.04   57.19
  -2   2   7   20.30    6.60
  -2   2   7   22.70    4.40
  -2   2   7   23.10    2.20
   2   2  -7   25.10    3.90
   2   2  -7   20.30    4.80
   2   2  -7   16.80    4.70
   2   2  -7   23.20    2.90
  -2   2   7   17.60    4.40
  -2   2   7   21.30    2.30
  -2  -2   7   22.50    2.80
   2  -2  -7   22.10    3.80
  -2  -2   7   24.00    3.80
  -2  -2   7   14.70    4.00
  -2  -2   7   27.60    6.40
   2  -2  -7   23.70    7.30
   2   2  -6 2245.38   48.60
   2   2  -6 2208.58   47.00
  -2   2   6 2208.88   61.39
   2   2  -6 2301.37   56.49
  -2   2   6 2218.68   44.90
  -2   2   6 2170.98   44.30
   2   2  -6 2242.68   50.09
  -2   2   6 2241.88   48.20
  -2  -2   6 2242.88   47.10
   2  -2  -6 2241.68   60.99
  -2  -2   6 2245.48   49.80
  -2  -2   6 2227.08   48.60
  -2  -2   6 2206.98   54.79
   2  -2  -6 2252.97   48.00
  -2   2   5    3.90    1.00
   2   2  -5    2.90    2.30
  -2   2   5    1.40    3.00
   2   2  -5    4.70    1.80
   2   2  -5    6.50    1.70
  -2   2   5    4.60    1.60
   2   2  -5    8.00    2.00
  -2  -2   5    4.40    1.70
   2  -2  -5    3.00    3.00
   2  -2  -5    3.40    1.30
  -2  -2   5    2.50    2.60
  -2  -2   5    6.10    1.90
   2  -2  -5    4.60    1.10
  -2  -2   5    3.30    1.20
  -2   2   4  776.22   27.70
  -2   2   4  785.02   17.30
   2   2  -4  766.22   23.00
  -2   2   4  778.12   18.90
   2   2  -4  791.92   19.30
   2   2  -4  748.93   18.90
   2   2  -4  784.82   17.80
  -2  -2   4  812.32   18.30
  -2  -2   4  767.22   19.30
  -2  -2   4  769.92   22.60
   2  -2  -4  815.42   28.00
   2  -2  -4  772.52   17.50
  -2  -2   4  776.02   19.00
   2  -2  -4  769.12   18.70
   2   2  -3    1.80    0.70
   2   2  -3    3.30    1.40
  -2   2   3    3.00    1.00
  -2   2   3   -0.70    2.20
   2   2  -3    3.80    1.20
  -2   2   3    2.50    0.80
   2   2  -3    3.80    1.00
  -2  -2   3    2.80    1.10
   2  -2  -3    2.20    2.30
  -2  -2   3    3.60    1.20
   2  -2  -3    3.40    0.90
  -2  -2   3    5.00    1.50
   2  -2  -3    3.20    1.00
  -2  -2   3    3.00    0.90
  -2   2   2 1273.97   34.20
   2   2  -2 1229.58   27.40
  -2   2   2 1229.28   25.40
  -2   2   2 1292.97   29.40
   2   2  -2 1264.37   25.90
   2   2  -2 1226.58   26.50
   2   2  -2 1287.67   26.40
  -2   2   2 1203.28   25.50
  -2  -2   2 1265.57   27.20
   2  -2  -2 1232.28   25.60
   2  -2  -2 1247.48   25.40
  -2  -2   2 1252.87   26.20
   2  -2  -2 1286.07   34.20
  -2  -2   2 1261.67   26.60
  -2  -2   2 1259.07   26.00
  -2   2   1   -0.20    0.30
  -2   2   1   -0.10    0.80
   2   2  -1   -0.10    0.40
  -2   2   1    0.00    0.30
   2   2  -1   -0.10    0.50
   2   2  -1    1.00    0.50
  -2   2   1   -0.30    1.40
   2  -2  -1   -0.60    1.20
  -2  -2   1    0.20    0.80
   2  -2  -1    0.70    0.90
  -2  -2   1   -0.50    0.30
  -2  -2   1   -0.40    0.30
  -2  -2   1    0.50    1.00
   2  -2  -1    0.00    0.30
  -2  -2   1    0.20    0.50
   2  -2  -1    0.10    0.40
   2   2   0 4070.39   84.39
   2   2   0 4241.78   76.19
  -2   2   0 4104.29   81.69
  -2   2   0 4215.68   84.99
   2  -2   0 4195.88   84.99
  -2  -2   0 4145.79   84.89
   2  -2   0 4242.08   81.89
  -2  -2   0 4059.49   77.59
  -2   2  -1    0.40    1.40
  -2   2  -1    1.10    0.70
   2   2   1    1.10    0.90
   2   2   1    2.10    0.90
  -2   2  -1    3.40    1.60
  -2   2  -1    1.10    0.70
   2   2   1    1.50    0.50
   2   2   1    1.90    1.70
   2  -2   1    1.40    0.60
   2  -2   1    3.30    2.00
  -2  -2  -1    2.00    0.60
   2  -2   1    2.10    1.20
   2  -2   1    1.80    0.80
  -2  -2  -1    0.90    1.60
  -2  -2  -1    1.90    0.80
   2   2   2 5786.42  121.09
   2   2   2 5824.72  112.19
  -2   2  -2 5820.12  116.29
  -2   2  -2 5776.62  114.89
   2  -2   2 6012.60  114.59
   2  -2   2 5810.22  116.79
  -2  -2  -2 5845.02  122.19
   2   2   3    4.10    1.50
  -2   2  -3    2.50    2.20
  -2   2  -3    6.80    1.60
  -2   2  -3    3.50    1.20
  -2   2  -3    3.40    2.10
   2   2   3    4.50    2.00
   2   2   3    5.10    2.90
  -2  -2  -3    5.80    3.20
   2  -2   3    2.90    2.20
   2  -2   3    3.80    1.80
  -2  -2  -3    5.10    0.40
   2  -2   3    5.20    1.30
  -2  -2  -3    3.90    0.40
   2  -2   3    4.60    1.50
  -2  -2  -3    5.50    1.50
  -2   2  -4 1288.87   30.20
  -2   2  -4 1243.58   28.20
  -2   2  -4 1234.78   35.10
   2   2   4 1250.67   29.40
   2   2   4 1291.67   40.90
  -2   2  -4 1279.67   35.50
  -2  -2  -4 1276.27   41.60
  -2  -2  -4 1267.67   29.80
   2  -2   4 1292.97   29.90
   2  -2   4 1262.77   28.10
   2  -2   4 1328.77   36.90
   2  -2   4 1226.18   34.10
   2   2   5    0.70    0.20
  -2   2  -5   -0.20    1.30
   2   2   5    0.50    1.10
  -2   2  -5   -0.20    2.70
   2   2   5    0.80    2.30
   2   2   5   -1.80    2.90
  -2   2  -5    0.80    2.60
  -2   2  -5   -1.20    2.40
  -2   2  -5    0.00    0.80
   2  -2   5   -0.50    1.10
  -2  -2  -5    0.30    3.40
   2  -2   5    1.50    0.90
  -2  -2  -5    0.60    0.30
  -2  -2  -5   -1.30    1.00
   2  -2   5   -0.80    2.40
  -2   2  -6  410.76   19.30
   2   2   6  377.66    8.30
   2   2   6  366.16   18.00
  -2   2  -6  399.96   14.90
   2   2   6  414.96   14.70
  -2   2  -6  412.66   12.80
  -2   2  -6  420.96   21.00
  -2   2  -6  377.66   19.40
   2  -2   6  365.26   18.00
   2  -2   6  399.26   12.40
  -2  -2  -6  408.46   24.40
   2  -2   6  385.06   14.30
  -2  -2  -6  391.96    8.50
  -2   2  -7   16.20    6.40
  -2   2  -7   16.10    5.20
   2   2   7   14.70    6.50
  -2   2  -7   12.30    4.80
  -2   2  -7   19.00    2.90
   2   2   7   21.70    5.50
   2   2   7   20.40    1.40
   2   2   7   13.80    3.10
  -2   2  -7   21.30    4.10
  -2  -2  -7   16.10    3.40
   2  -2   7   29.20    8.10
  -2  -2  -7   20.40    7.50
   2  -2   7   18.10    2.90
   2  -2   7   13.00    3.10
  -2  -2  -7   20.30    1.40
  -2   2  -8 1449.76   44.80
   2   2   8 1322.47   43.30
   2   2   8 1366.36   26.90
  -2   2  -8 1370.86   47.60
   2   2   8 1390.66   36.00
  -2   2  -8 1332.87   45.60
  -2   2  -8 1359.96   36.80
  -2   2  -8 1383.16   32.30
   2   2   8 1280.87   49.40
  -2  -2  -8 1351.56   52.39
   2  -2   8 1347.37   31.80
   2  -2   8 1362.56   36.20
  -2  -2  -8 1343.77   27.10
   2  -2   8 1374.06   43.50
  -2  -2  -8 1390.86   36.70
   2   2   9   61.79    2.90
   2   2   9   53.49   12.30
   2   2   9   56.59    2.80
  -2   2  -9   56.89   11.90
   2   2   9   46.50    6.30
   2   2   9   59.09   12.60
  -2   2  -9   40.50    9.20
  -2   2  -9   41.40    9.10
  -2   2  -9   52.19    7.30
  -2   2  -9   58.29    4.90
   2  -2   9   59.89   11.30
   2  -2   9   64.09    4.90
   2  -2   9   63.49    7.90
  -2  -2  -9   61.69    6.50
  -2  -2  -9   59.09   13.80
  -2   2 -10 1628.54   52.39
  -2   2 -10 1593.74   56.49
   2   2  10 1567.94   51.79
   2   2  10 1547.85   31.30
  -2   2 -10 1570.74   55.09
  -2   2 -10 1542.25   36.90
   2   2  10 1534.25   31.30
  -2   2 -10 1501.25   42.90
   2   2  10 1530.35   41.90
   2  -2  10 1596.34   37.00
   2  -2  10 1572.94   51.49
  -2  -2 -10 1605.04   63.09
   2  -2  10 1540.85   42.50
  -2  -2 -10 1586.84   43.20
   2   2  11    8.60    4.20
   2   2  11    8.70    7.50
  -2   2 -11    8.30    7.40
  -2   2 -11    8.40    8.60
  -2   2 -11    3.50    3.50
  -2   2 -11    9.60    8.00
   2   2  11    5.70    1.40
  -2   2 -11    7.00    2.20
   2   2  11    7.70    1.40
  -2  -2 -11    0.20    9.20
   2  -2  11    4.30    3.20
  -2  -2 -11    4.40    9.40
  -2  -2 -11    3.20    2.80
   2  -2  11    5.90    2.10
   2  -2  11    5.00    6.90
   2   2  12  600.24   24.70
  -2   2 -12  579.24   32.60
  -2   2 -12  586.14   35.20
   2   2  12  620.94   14.40
   2   2  12  608.44   33.40
  -2   2 -12  603.44   19.60
  -2   2 -12  627.24   26.00
  -2   2 -12  656.53   37.20
   2   2  12  630.54   14.40
   2  -2  12  613.94   33.40
  -2  -2 -12  694.33   42.90
   2  -2  12  624.94   19.60
  -2   2 -13   27.30   10.50
   2   2  13   10.20    1.60
  -2   2 -13    9.50   10.60
   2   2  13   11.80    1.80
  -2   2 -13   12.50    3.40
  -2   2 -13    5.10   10.20
   2   2  13   15.20   11.10
  -2   2 -13   14.30    5.10
   2  -2  13   10.80    3.10
  -2  -2 -13   19.00    5.90
  -2  -2 -13   -0.90   13.10
  -2  -2 -13    4.50   12.90
   2  -2  13    8.40   11.00
  -2   2 -14   58.49   17.50
  -2   2 -14   59.69   15.90
  -2   2 -14   51.49   16.30
   2   2  14   46.50   14.70
  -2   2 -14   52.49    9.30
  -2   2 -14   52.39    5.90
  -2  -2 -14   45.00    8.30
   2  -2  14   55.99    6.10
   2  -2  14   62.99   17.50
  -2   2 -15    2.50    2.80
   2   2  15   23.30   16.10
  -2   2 -15    3.40    4.50
  -2   2 -15    9.90   13.90
  -2   2 -15    9.70   14.80
  -2  -2 -15    2.80    5.10
   2  -2  15    2.60    3.10
  -2  -2 -15  -19.90   14.20
  -2   2 -16  328.67   14.50
  -2   2 -16  360.56   36.00
  -2   2 -16  337.57   35.60
  -2   2 -16  345.47   23.50
  -2  -2 -16  340.37   41.00
   2  -2  16  304.67   14.00
  -2  -2 -16  328.07   21.60
  -2   2 -17   37.80    6.00
  -2   2 -17   52.69   21.80
  -2   2 -17   41.20    9.60
  -2  -2 -17   53.89   11.80
  -2  -2 -17   32.80   24.40
  -2   2 -19  -14.00   26.80
  -2  -2 -19   11.50   36.20
   2  -3 -20   -7.50   29.80
  -2  -3  20    0.30    6.00
   2   3 -19    0.60   17.40
  -2  -3  19    7.40    5.20
   2  -3 -19   60.89   26.20
   2   3 -18  -16.70   17.40
   2   3 -18   -4.70   14.60
   2   3 -18   43.80    9.20
   2  -3 -18   22.70    8.40
   2  -3 -18   16.70   21.20
   2   3 -17  154.18   11.20
   2   3 -17  130.29   14.50
  -2  -3  17  146.39   11.70
   2  -3 -17  152.78   14.80
  -2  -3  17  151.08   11.10
   2  -3 -17  130.19   27.30
   2   3 -16  145.89   13.80
   2   3 -16   85.59   16.80
   2   3 -16  160.78   11.10
   2   3 -16  117.59   18.20
   2  -3 -16  130.89   24.50
   2  -3 -16  123.99   12.80
  -2  -3  16  143.69   10.80
   2   3 -15  623.14   31.20
  -2   3  15  617.34   17.50
   2   3 -15  616.84   26.90
  -2   3  15  609.54   16.90
  -2   3  15  593.04   42.30
   2   3 -15  629.64   34.00
  -2   3  15  581.14   39.90
   2   3 -15  586.04   21.90
   2  -3 -15  654.33   44.00
  -2  -3  15  615.94   22.30
   2  -3 -15  638.04   26.60
  -2   3  14   78.69   18.30
   2   3 -14   63.19    9.50
  -2   3  14   69.29    4.70
   2   3 -14   59.09    6.40
   2   3 -14   53.59   12.20
  -2   3  14   64.29    5.00
  -2   3  14   66.19   17.70
   2  -3 -14   63.89    9.50
  -2  -3  14   53.39    6.50
   2  -3 -14   37.30   14.10
   2   3 -13  225.28   12.10
  -2   3  13  227.68   14.40
   2   3 -13  254.77   15.40
  -2   3  13  259.27   26.80
   2   3 -13  260.17   23.50
   2   3 -13  269.17   20.20
  -2   3  13  234.78    9.00
   2   3 -13  243.58   26.50
  -2   3  13  248.18    9.60
  -2   3  13  219.38   23.30
   2  -3 -13  295.47   27.10
   2  -3 -13  240.38   14.60
  -2  -3  13  235.38   12.20
  -2   3  12    3.60    7.20
  -2   3  12    5.20    2.00
   2   3 -12    5.10    2.40
   2   3 -12    5.80    5.80
  -2   3  12    6.50    4.20
   2   3 -12    3.00    3.00
   2   3 -12    1.60    5.40
   2   3 -12    7.50    7.10
  -2   3  12    4.60    1.80
  -2   3  12    7.20    9.60
   2  -3 -12    5.90    2.90
   2  -3 -12   -2.10    7.60
  -2  -3  12   12.90    3.30
  -2  -3  12    6.30    4.00
  -2   3  11   10.60    2.00
   2   3 -11   10.20    2.90
   2   3 -11    9.70    5.10
  -2   3  11    8.90    2.10
  -2   3  11    6.70    7.40
   2   3 -11    8.10    7.40
   2   3 -11    8.00    3.50
   2   3 -11   14.30    5.90
  -2   3  11   12.40    3.90
  -2   3  11    5.60    8.40
  -2  -3  11    8.90    7.20
   2  -3 -11   12.30    3.60
  -2  -3  11    9.70    4.10
   2  -3 -11    3.30    8.00
  -2  -3  11    7.70    2.70
  -2   3  10   15.40    2.40
   2   3 -10   31.10    9.50
  -2   3  10   18.30    2.70
   2   3 -10   11.60    4.40
  -2   3  10   19.00    9.00
   2   3 -10   19.20    5.90
   2   3 -10   16.60    4.30
  -2   3  10   13.90    7.70
   2   3 -10   18.50    3.80
  -2   3  10   19.70    4.60
  -2  -3  10   17.40    3.70
   2  -3 -10   17.60    4.30
  -2  -3  10    7.40    7.00
  -2  -3  10   14.10    4.10
   2  -3 -10   19.60    8.30
  -2   3   9  546.95   15.00
   2   3  -9  563.24   27.20
   2   3  -9  542.95   21.60
   2   3  -9  582.34   20.80
  -2   3   9  550.54   19.30
  -2   3   9  546.65   14.50
  -2   3   9  547.85   27.20
  -2   3   9  568.74   31.30
   2   3  -9  561.44   18.10
   2   3  -9  557.34   20.00
   2  -3  -9  553.14   19.30
   2  -3  -9  581.84   31.50
  -2  -3   9  542.65   25.60
  -2  -3   9  533.45   19.60
  -2  -3   9  576.04   18.30
   2   3  -8  183.88   14.20
  -2   3   8  244.38   20.70
  -2   3   8  169.98    9.10
   2   3  -8  172.38    9.70
   2   3  -8  171.08    8.70
   2   3  -8  151.38   10.00
  -2   3   8  171.98    6.40
  -2   3   8  169.88    6.80
  -2   3   8  149.09   16.00
  -2  -3   8  181.58    8.80
   2  -3  -8  166.48    9.00
   2  -3  -8  153.48   15.50
  -2  -3   8  158.68   12.80
  -2  -3   8  157.88    9.20
   2   3  -7  386.06   13.40
  -2   3   7  365.26   13.80
  -2   3   7  377.46   10.90
  -2   3   7  392.16   23.90
   2   3  -7  386.46   14.20
   2   3  -7  385.46   19.30
  -2   3   7  365.46   10.40
   2   3  -7  392.46   13.40
   2   3  -7  393.56   14.40
  -2  -3   7  376.26   18.30
  -2  -3   7  368.56   13.10
  -2  -3   7  398.26   14.50
   2  -3  -7  369.16   13.40
   2  -3  -7  377.56   22.80
   2   3  -6  128.59    6.60
   2   3  -6  153.88    7.80
  -2   3   6  146.19   14.10
   2   3  -6  157.28    7.70
  -2   3   6  144.69    7.40
   2   3  -6  149.29   10.90
  -2   3   6  159.28    5.70
  -2  -3   6  161.08    8.00
   2  -3  -6  129.99   12.70
   2  -3  -6  156.78    7.50
  -2  -3   6  147.69   10.40
  -2  -3   6  169.08    7.70
   2  -3  -6  158.88    6.10
  -2   3   5  664.73   17.50
   2   3  -5  626.84   22.30
   2   3  -5  644.84   17.90
  -2   3   5  650.03   15.30
   2   3  -5  662.23   17.90
   2   3  -5  659.23   14.40
   2   3  -5  649.54   14.10
  -2   3   5  686.53   28.60
   2  -3  -5  644.24   15.50
  -2  -3   5  650.23   21.90
   2  -3  -5  629.34   17.10
  -2  -3   5  655.23   17.90
   2  -3  -5  672.23   28.10
  -2  -3   5  664.33   18.20
   2   3  -4   45.40    3.60
   2   3  -4   40.30    3.30
  -2   3   4   26.90    6.20
  -2   3   4   38.80    3.00
  -2   3   4   46.20    2.70
   2   3  -4   43.50    4.80
   2  -3  -4   37.10    7.10
  -2  -3   4   41.50    3.40
   2  -3  -4   42.70    2.70
   2  -3  -4   44.00    3.10
  -2  -3   4   43.90    3.50
  -2  -3   4   38.40    4.50
  -2   3   3   10.00    1.60
  -2   3   3   16.60    4.80
   2   3  -3   17.80    3.10
  -2   3   3   12.80    1.50
   2   3  -3   14.40    2.10
  -2   3   3   17.20    3.40
   2   3  -3   18.50    2.20
  -2  -3   3   15.40    1.90
   2  -3  -3   20.60    5.10
  -2  -3   3   13.50    2.10
   2  -3  -3   14.40    1.60
  -2  -3   3   17.00    3.20
   2  -3  -3   14.70    1.60
  -2   3   2   22.00    1.70
  -2   3   2   17.80    1.80
   2   3  -2   23.20    1.90
   2   3  -2   18.60    2.40
  -2   3   2   15.10    4.40
   2   3  -2   20.30    2.10
   2  -3  -2   18.80    1.80
  -2  -3   2   21.90    1.90
   2  -3  -2   13.40    4.00
  -2  -3   2   18.50    2.40
   2  -3  -2   24.40    1.80
   2  -3  -2   24.50    4.00
  -2  -3   2   16.70    2.20
  -2  -3   2   20.90    2.20
   2   3  -1  765.82   21.30
   2   3  -1  775.12   16.60
   2   3  -1  801.32   17.40
  -2   3   1  762.72   17.80
  -2   3   1  785.82   25.30
  -2   3   1  762.72   16.20
   2   3  -1  764.12   17.80
   2  -3  -1  763.82   25.00
   2  -3  -1  762.92   17.70
  -2  -3   1  797.12   17.30
   2  -3  -1  764.62   16.30
  -2  -3   1  783.92   21.80
  -2  -3   1  764.62   16.50
  -2  -3   1  758.52   17.70
   2  -3  -1  809.62   21.50
  -2   3   0    3.40    2.30
   2   3   0    6.10    2.60
   2   3   0    5.90    1.20
  -2   3   0    6.50    1.40
  -2   3   0    8.30    1.30
   2   3   0    7.30    1.20
  -2   3   0    5.00    2.70
   2  -3   0    7.90    1.50
  -2  -3   0    5.40    1.10
  -2  -3   0    6.40    1.10
  -2  -3   0    5.80    1.20
   2  -3   0    3.10    1.40
   2  -3   0    5.90    1.20
  -2  -3   0    6.40    1.20
   2  -3   0    5.60    2.70
  -2  -3   0    5.20    2.30
  -2   3  -1 2843.72   61.79
   2   3   1 2658.83   53.69
   2   3   1 2794.12   52.99
  -2   3  -1 2822.12   54.29
  -2   3  -1 2826.82   59.79
   2   3   1 2826.62   54.89
   2   3   1 2758.22   64.59
  -2  -3  -1 2743.53   52.89
   2  -3   1 2799.52   61.79
  -2  -3  -1 2801.62   53.99
   2  -3   1 2781.42   54.19
   2  -3   1 2923.71   59.79
  -2  -3  -1 2736.83   65.09
   2   3   2    0.50    0.70
   2   3   2    1.20    0.50
  -2   3  -2    0.30    1.30
  -2   3  -2    1.60    1.00
   2   3   2    1.90    2.30
  -2   3  -2    0.60    1.70
  -2   3  -2    1.40    0.90
   2  -3   2    0.60    1.20
   2  -3   2    1.00    0.90
  -2  -3  -2    0.70    2.30
   2  -3   2    1.00    1.60
  -2  -3  -2    0.90    0.80
   2  -3   2    1.50    0.90
  -2  -3  -2    1.60    0.50
   2   3   3 1789.82   41.80
  -2   3  -3 1744.33   38.20
   2   3   3 1792.52   50.59
  -2   3  -3 1796.52   38.20
  -2   3  -3 1785.52   43.50
  -2   3  -3 1825.42   44.40
   2   3   3 1739.53   37.40
   2  -3   3 1822.82   38.30
  -2  -3  -3 1721.23   32.80
  -2  -3  -3 1798.62   37.80
   2  -3   3 1806.82   38.00
  -2  -3  -3 1765.22   51.29
   2  -3   3 1743.83   44.10
   2  -3   3 1805.72   43.40
  -2  -3  -3 1716.13   32.90
   2   3   4    4.80    4.00
   2   3   4    1.90    1.10
  -2   3  -4    3.70    1.50
  -2   3  -4    5.20    1.70
   2   3   4    5.20    2.70
  -2   3  -4    1.30    2.30
  -2   3  -4    0.40    2.20
  -2  -3  -4    2.30    3.30
   2  -3   4    1.90    2.10
  -2  -3  -4    2.90    1.60
   2  -3   4    2.70    1.40
   2  -3   4    3.00    1.30
   2  -3   4    1.60    2.40
   2   3   5  527.95   16.20
  -2   3  -5  529.95   22.00
  -2   3  -5  540.55   21.10
   2   3   5  519.45   26.20
  -2   3  -5  522.55   15.70
   2  -3   5  547.65   21.30
   2  -3   5  536.55   21.90
  -2  -3  -5  528.35   16.40
  -2  -3  -5  574.74   28.20
   2  -3   5  530.35   16.70
   2  -3   5  536.05   15.50
  -2   3  -6   -2.00    2.80
  -2   3  -6    0.50    1.20
   2   3   6    3.30    3.10
  -2   3  -6   -1.60    2.70
   2   3   6    3.20    4.30
  -2   3  -6    2.40    1.60
   2   3   6   -0.10    1.40
  -2   3  -6    2.50    2.90
   2  -3   6    1.30    2.80
   2  -3   6    1.10    1.10
  -2  -3  -6    5.00    5.20
   2  -3   6    0.40    1.50
  -2   3  -7  664.23   21.60
  -2   3  -7  646.34   26.10
   2   3   7  663.13   32.90
  -2   3  -7  667.13   28.40
  -2   3  -7  644.44   19.00
  -2   3  -7  612.94   27.70
   2   3   7  684.73   20.90
   2   3   7  622.34   26.10
   2  -3   7  678.13   26.90
  -2  -3  -7  651.43   21.00
  -2  -3  -7  669.03   34.50
   2  -3   7  651.93   18.70
   2  -3   7  687.03   21.40
  -2   3  -8   13.50    6.60
  -2   3  -8    8.50    5.50
  -2   3  -8   18.50    6.00
   2   3   8   20.50    4.10
   2   3   8   17.30    7.80
   2   3   8   32.20    8.10
  -2   3  -8   16.30    3.80
   2  -3   8   19.20    6.10
  -2  -3  -8    7.90    6.40
   2  -3   8   18.80    4.40
  -2  -3  -8   17.00    3.40
   2  -3   8   18.90    3.20
  -2   3  -9 1690.73   44.80
   2   3   9 1654.93   52.59
   2   3   9 1703.43   62.09
  -2   3  -9 1744.63   67.49
  -2   3  -9 1690.43   40.30
  -2   3  -9 1695.53   56.09
  -2   3  -9 1719.83   57.19
   2   3   9 1690.23   43.40
   2  -3   9 1670.03   43.90
  -2  -3  -9 1747.63   65.39
   2  -3   9 1684.83   52.49
  -2  -3  -9 1754.92   44.60
   2  -3   9 1742.73   40.00
  -2   3 -10   45.60   10.10
  -2   3 -10   56.29    8.00
  -2   3 -10   55.19    5.40
  -2   3 -10   53.29   12.30
   2   3  10   32.70   11.80
   2   3  10   51.89    9.30
  -2   3 -10   54.19   12.20
   2   3  10   58.19    7.70
  -2  -3 -10   69.79    7.50
   2  -3  10   54.09   10.70
  -2  -3 -10   53.69   14.40
   2  -3  10   63.79    5.60
   2  -3  10   52.99    7.20
   2   3  11  464.65   19.90
  -2   3 -11  449.46   26.10
  -2   3 -11  480.35   29.90
   2   3  11  456.25   27.50
  -2   3 -11  442.76   29.20
   2   3  11  463.75   33.40
  -2   3 -11  444.86   16.40
  -2   3 -11  413.16   19.90
   2  -3  11  438.66   19.90
   2  -3  11  460.35   27.70
   2  -3  11  484.05   16.80
  -2  -3 -11  464.05   35.00
  -2  -3 -11  458.15   20.30
  -2   3 -12   49.60   11.70
   2   3  12   71.39   14.00
  -2   3 -12   88.89   17.90
  -2   3 -12   83.69   10.70
  -2   3 -12   76.39    6.60
  -2   3 -12   71.29   14.70
   2   3  12   82.19    9.10
  -2  -3 -12   77.99   18.60
   2  -3  12   77.49    6.70
   2  -3  12   51.59   12.00
  -2   3 -13  155.68    9.70
  -2   3 -13  168.98   20.40
  -2   3 -13  157.88   13.20
  -2   3 -13  183.08   23.20
   2   3  13  164.78   22.90
  -2   3 -13  176.68   24.90
   2  -3  13  167.48   22.20
   2  -3  13  156.28    9.70
  -2  -3 -13  151.18   24.70
  -2  -3 -13  152.18   13.10
  -2  -3 -13  185.48   26.70
  -2   3 -14   13.70   11.80
  -2   3 -14    0.60    4.40
  -2   3 -14    1.00    2.80
   2   3  14    7.10   13.40
  -2   3 -14   19.30   12.70
  -2   3 -14    5.70   11.90
  -2  -3 -14    5.30    4.80
  -2  -3 -14   11.40   13.30
   2  -3  14    0.40    3.00
   2   3  15  -12.00   15.00
  -2   3 -15   19.80    7.50
  -2   3 -15   19.20   14.10
  -2   3 -15   20.20   17.90
  -2   3 -15   19.30   14.50
  -2   3 -15   18.20    4.60
  -2  -3 -15   31.20   18.50
  -2  -3 -15   23.70    7.60
   2  -3  15   16.90    4.70
  -2   3 -16   35.70   17.40
  -2   3 -16   55.99    7.60
   2   3  16    1.60   24.80
  -2   3 -16   23.90   18.10
  -2  -3 -16   44.10   10.60
  -2  -3 -16   36.00   22.20
   2  -3  16   44.20    6.70
  -2   3 -17  210.28   34.60
  -2   3 -17  240.08   38.30
  -2   3 -17  206.88   12.60
  -2   3 -17  198.38   18.50
  -2  -3 -17  208.98   18.60
  -2  -3 -17  251.67   41.60
  -2   3 -18   58.39    7.50
  -2   3 -18   10.10   24.10
  -2  -3 -18   54.39   29.20
  -2   3 -19   -2.40   28.60
  -2  -3 -19   45.10   33.60
  -2  -4  20    3.70    6.70
   2  -4 -20   20.80   31.90
   2   4 -19   -2.40   16.90
   2  -4 -19   23.40   26.70
  -2  -4  19    0.00    5.20
   2   4 -18   28.80    8.80
   2   4 -18   35.80    7.30
   2   4 -18   14.20   16.70
   2   4 -18   -7.10   13.20
  -2  -4  18   27.80    6.60
   2  -4 -18   32.20    9.50
   2  -4 -18   19.50   23.20
   2   4 -17   88.59   16.60
   2   4 -17   83.09    9.10
   2   4 -17   13.20   12.60
   2  -4 -17   49.50   22.00
   2  -4 -17   80.09   10.80
   2   4 -16  226.08   21.30
   2   4 -16  289.07   19.10
  -2   4  16  296.17   36.70
   2   4 -16  267.47   14.80
   2  -4 -16  275.47   17.90
   2  -4 -16  308.07   37.00
  -2  -4  16  270.67   15.00
  -2   4  15  305.87   32.30
   2   4 -15  304.17   18.50
  -2   4  15  307.37   10.30
   2   4 -15  304.57   15.60
   2  -4 -15  282.57   31.70
   2  -4 -15  317.17   18.00
  -2  -4  15  294.57   15.10
  -2   4  14  289.17   31.30
   2   4 -14  295.37   20.90
   2   4 -14  238.48   13.40
   2   4 -14  250.17   18.30
   2   4 -14  255.17   16.30
  -2   4  14  244.28    8.80
  -2   4  14  267.37    9.40
   2   4 -14  256.57   25.20
   2  -4 -14  271.27   29.70
   2  -4 -14  286.47   16.60
  -2  -4  14  250.77   13.80
  -2   4  13   31.50   14.70
   2   4 -13   74.59   15.30
   2   4 -13   18.70    7.40
   2   4 -13   43.60    9.50
   2   4 -13   42.10    6.50
  -2   4  13   45.30    7.50
  -2   4  13   34.50   12.20
   2   4 -13   35.40    6.80
  -2   4  13   44.50    3.50
  -2   4  13   39.20    3.60
  -2  -4  13   35.40    5.60
   2  -4 -13   15.60   11.30
   2  -4 -13   40.20    7.40
  -2   4  12   34.50   11.00
  -2   4  12   43.90    8.10
   2   4 -12   48.70    9.00
   2   4 -12   55.39    8.40
  -2   4  12   45.30    3.80
   2   4 -12   48.00    5.80
  -2   4  12   54.59    3.80
   2   4 -12   50.39    8.30
  -2   4  12   60.49   15.90
   2   4 -12   41.80   11.80
  -2  -4  12   49.40    5.90
  -2  -4  12   45.90    7.20
   2  -4 -12   61.49   16.10
   2  -4 -12   42.70    6.80
   2   4 -11    3.00    2.10
  -2   4  11   15.30    9.10
  -2   4  11    5.40    1.80
  -2   4  11    8.50    9.20
   2   4 -11    7.10    4.80
   2   4 -11    1.20    5.60
  -2   4  11    5.90    1.60
   2   4 -11    2.80    4.10
  -2   4  11    4.60    3.10
   2   4 -11    2.40    2.40
   2  -4 -11    5.70    2.90
  -2  -4  11    7.00    2.40
   2  -4 -11   12.90    9.10
  -2  -4  11    5.40    3.80
  -2  -4  11    3.90    8.60
  -2   4  10    8.90    1.80
   2   4 -10   13.30    3.30
  -2   4  10    4.40    2.60
  -2   4  10   17.50    9.60
  -2   4  10    8.10    2.00
   2   4 -10    8.60    4.10
   2   4 -10    8.50    4.00
  -2   4  10   12.20    6.70
   2   4 -10    9.90    3.20
   2   4 -10    9.30    6.60
   2  -4 -10    2.80    6.90
  -2  -4  10    6.40    3.20
   2  -4 -10   12.30    3.70
  -2  -4  10   13.50    3.60
  -2  -4  10    7.80    5.60
   2   4  -9   78.79    6.30
  -2   4   9   67.49    4.20
  -2   4   9   76.49    6.60
   2   4  -9   64.79    6.80
   2   4  -9   78.99   12.90
   2   4  -9   52.09    5.60
  -2   4   9   53.99   12.30
  -2   4   9   74.19    4.10
   2   4  -9   77.09    6.90
  -2   4   9   66.99   11.60
  -2  -4   9   86.79   11.20
  -2  -4   9   59.19    6.20
   2  -4  -9   77.89   14.60
   2  -4  -9   70.09    6.10
  -2  -4   9   70.49    6.00
   2   4  -8 1267.47   32.90
   2   4  -8 1311.47   34.10
   2   4  -8 1267.17   42.60
   2   4  -8 1278.37   31.80
  -2   4   8 1263.07   27.70
  -2   4   8 1353.36   33.50
   2   4  -8 1305.97   30.70
  -2   4   8 1337.17   50.89
  -2   4   8 1296.47   28.50
   2  -4  -8 1301.97   49.90
  -2  -4   8 1307.37   32.90
  -2  -4   8 1320.87   34.20
  -2  -4   8 1372.36   41.60
   2  -4  -8 1255.17   32.60
  -2   4   7   68.49    5.30
  -2   4   7   71.29    3.80
  -2   4   7   47.10   10.30
   2   4  -7   60.49    4.40
   2   4  -7   71.49    8.70
   2   4  -7   66.39    5.50
   2   4  -7   78.09    5.80
   2  -4  -7   70.29    4.00
  -2  -4   7   73.19    5.60
  -2  -4   7   70.89    5.80
   2  -4  -7   77.59    5.60
  -2  -4   7   63.99    8.40
   2  -4  -7   59.09   11.50
  -2   4   6 3518.05   70.59
  -2   4   6 3428.46   66.89
   2   4  -6 3490.75   80.19
   2   4  -6 3492.75   71.49
  -2   4   6 3505.55   99.59
   2   4  -6 3402.26   71.59
  -2  -4   6 3453.15   71.29
  -2  -4   6 3512.95   78.29
   2  -4  -6 3493.85   70.39
  -2  -4   6 3424.56   71.59
   2  -4  -6 3549.34   90.39
   2  -4  -6 3496.45   67.39
  -2   4   5  109.09   12.20
  -2   4   5  139.99    6.50
  -2   4   5  134.99    5.30
   2   4  -5  124.89    9.30
   2   4  -5  152.18    7.40
   2   4  -5  127.39    6.60
   2  -4  -5  142.89    5.50
  -2  -4   5  131.39    9.10
   2  -4  -5  112.59   12.50
  -2  -4   5  143.99    7.00
   2  -4  -5  138.99    6.30
  -2  -4   5  139.39    7.10
  -2   4   4 1528.05   47.80
   2   4  -4 1493.05   34.00
   2   4  -4 1491.65   38.10
   2   4  -4 1523.05   33.00
  -2   4   4 1482.15   31.30
  -2   4   4 1488.25   32.00
   2  -4  -4 1499.95   31.80
   2  -4  -4 1474.85   31.30
   2  -4  -4 1571.34   47.80
  -2  -4   4 1500.25   34.00
  -2  -4   4 1543.75   37.30
  -2  -4   4 1488.45   33.00
  -2   4   3    9.30    2.80
   2   4  -3    6.20    2.00
   2   4  -3   11.40    2.30
  -2   4   3    9.70    1.70
  -2   4   3    8.20    1.50
  -2   4   3   11.00    4.80
   2   4  -3    7.10    1.60
   2   4  -3   10.90    1.80
  -2  -4   3    7.70    1.80
   2  -4  -3    9.40    1.60
   2  -4  -3    5.70    3.90
  -2  -4   3    3.40    1.90
  -2  -4   3    8.30    1.60
   2  -4  -3    4.90    2.40
   2  -4  -3    6.60    1.40
  -2  -4   3    8.20    1.90
   2   4  -2 1526.85   33.40
   2   4  -2 1537.75   34.50
  -2   4   2 1574.34   44.80
  -2   4   2 1559.54   37.30
   2   4  -2 1538.55   31.30
   2   4  -2 1569.84   35.50
  -2   4   2 1542.85   30.60
  -2   4   2 1555.74   32.60
  -2  -4   2 1531.55   35.80
   2  -4  -2 1534.15   32.50
  -2  -4   2 1542.85   34.10
  -2  -4   2 1545.35   33.50
   2  -4  -2 1600.84   38.40
   2  -4  -2 1505.25   30.40
  -2  -4   2 1517.85   31.50
   2  -4  -2 1567.64   44.40
  -2   4   1   10.50    1.10
   2   4  -1   12.90    2.30
  -2   4   1    9.00    3.70
  -2   4   1   11.70    1.10
   2   4  -1    9.70    1.80
   2   4  -1    9.50    1.30
  -2   4   1   11.30    1.90
  -2   4   1    8.50    2.40
   2   4  -1    9.00    2.90
   2  -4  -1    6.90    3.10
  -2  -4   1   11.20    1.20
  -2  -4   1   10.90    3.30
  -2  -4   1   13.00    2.30
   2  -4  -1    6.90    2.00
   2  -4  -1   15.10    2.30
  -2  -4   1   12.20    2.00
   2   4   0  545.25   14.00
   2   4   0  550.04   20.50
  -2   4   0  526.85   14.50
  -2   4   0  541.05   12.40
  -2   4   0  531.85   20.70
   2   4   0  539.65   13.60
  -2   4   0  553.94   18.00
  -2  -4   0  556.74   14.10
  -2  -4   0  511.45   12.40
  -2  -4   0  528.25   12.10
   2  -4   0  519.55   12.40
   2  -4   0  537.85   17.90
   2  -4   0  543.95   14.50
   2  -4   0  547.15   21.00
  -2  -4   0  534.45   20.60
  -2  -4   0  523.95   13.40
   2   4   1    1.00    0.90
   2   4   1    1.10    2.60
   2   4   1    2.10    0.80
   2   4   1    1.00    0.70
  -2   4  -1   -0.50    1.90
  -2   4  -1    1.70    0.90
  -2   4  -1    1.00    0.90
  -2   4  -1    1.50    1.60
   2  -4   1    1.30    0.70
  -2  -4  -1    1.70    0.70
  -2  -4  -1    1.20    0.60
  -2  -4  -1    1.60    2.90
   2  -4   1    2.40    1.90
   2  -4   1    2.20    0.90
   2  -4   1    2.50    1.70
  -2   4  -2 1006.40   29.20
  -2   4  -2  989.20   28.80
  -2   4  -2 1007.40   22.90
   2   4   2  978.20   22.10
   2   4   2 1027.90   34.70
  -2   4  -2 1023.30   24.30
   2   4   2  996.70   20.70
  -2  -4  -2 1000.10   34.80
  -2  -4  -2  992.70   22.20
   2  -4   2  996.90   28.20
   2  -4   2 1018.90   22.90
   2  -4   2 1007.70   29.50
   2  -4   2  988.60   24.10
  -2  -4  -2  947.51   20.60
  -2   4  -3    2.00    1.20
   2   4   3    0.90    0.80
  -2   4  -3    0.00    0.80
   2   4   3    0.70    3.10
  -2   4  -3   -1.10    2.00
   2   4   3    1.30    0.50
  -2   4  -3    3.90    2.50
   2  -4   3    2.30    1.10
   2  -4   3    1.80    1.90
   2  -4   3    1.00    2.10
   2  -4   3    0.70    0.80
  -2  -4  -3    1.10    0.80
  -2  -4  -3    1.50    3.10
   2   4   4  589.04   16.30
   2   4   4  581.84   20.90
  -2   4  -4  579.44   17.10
  -2   4  -4  591.94   23.10
   2   4   4  632.14   28.50
  -2   4  -4  570.64   20.70
  -2   4  -4  558.44   16.90
   2  -4   4  578.94   16.80
   2  -4   4  569.64   16.80
   2  -4   4  606.04   21.90
  -2  -4  -4  588.24   28.50
  -2  -4  -4  560.04   16.20
   2  -4   4  578.84   21.80
   2   4   5    6.90    5.80
   2   4   5    8.70    4.20
  -2   4  -5    9.20    2.50
  -2   4  -5    7.30    2.40
   2   4   5    5.10    1.90
  -2   4  -5    5.20    3.30
  -2   4  -5    3.50    2.80
   2  -4   5    7.40    2.10
  -2  -4  -5   11.20    2.60
   2  -4   5   10.60    2.30
   2  -4   5    6.00    3.60
  -2  -4  -5    4.80    4.70
   2  -4   5    2.50    3.00
  -2   4  -6   39.20    4.30
   2   4   6   49.60   11.30
  -2   4  -6   21.40    5.20
  -2   4  -6   33.90    6.40
  -2   4  -6   39.00    5.30
   2  -4   6   44.20    8.40
   2  -4   6   39.70    5.30
  -2  -4  -6   42.90    6.00
  -2  -4  -6   35.60   10.40
   2  -4   6   53.49    8.70
   2  -4   6   36.50    5.30
  -2   4  -7   33.60    8.10
  -2   4  -7   22.30    6.20
  -2   4  -7   32.20    3.90
   2   4   7   46.30    8.80
  -2   4  -7   34.70    7.70
  -2   4  -7   36.80    5.40
   2   4   7   27.30    9.50
   2   4   7   25.30    4.10
   2  -4   7   34.00    7.90
   2  -4   7   37.30    5.30
  -2  -4  -7   34.40    4.80
   2  -4   7   38.30    3.90
  -2  -4  -7   22.10    8.70
   2   4   8  356.06   14.90
  -2   4  -8  362.96   14.10
  -2   4  -8  371.96   16.00
   2   4   8  347.17   20.30
   2   4   8  328.77   25.60
  -2   4  -8  365.46   22.30
  -2   4  -8  373.06   19.50
  -2   4  -8  387.76   21.80
   2  -4   8  339.87   20.20
  -2  -4  -8  360.86   27.30
   2  -4   8  360.66   15.40
  -2  -4  -8  352.06   15.20
   2  -4   8  353.86   13.50
   2   4   9   38.80   11.40
  -2   4  -9   70.29   12.20
  -2   4  -9   56.29   10.70
   2   4   9   65.49    6.70
  -2   4  -9   74.49    6.20
  -2   4  -9   46.90    9.30
  -2   4  -9   61.69    8.00
   2   4   9   74.39   12.20
   2  -4   9   83.89    6.30
  -2  -4  -9   68.19   14.90
   2  -4   9   65.99    6.90
   2  -4   9   67.29   12.00
  -2  -4  -9   73.49    7.00
   2   4  10  539.65   28.50
  -2   4 -10  511.65   21.20
  -2   4 -10  488.55   27.70
   2   4  10  499.35   20.00
  -2   4 -10  495.75   17.90
   2   4  10  483.15   33.40
  -2   4 -10  490.85   25.30
  -2   4 -10  516.45   30.00
   2  -4  10  502.65   27.60
   2  -4  10  488.25   17.40
   2  -4  10  494.05   23.00
  -2  -4 -10  520.85   36.20
  -2  -4 -10  525.85   20.80
  -2   4 -11   59.29    8.30
   2   4  11   80.09   18.20
  -2   4 -11   71.09    6.60
  -2   4 -11   48.20   10.80
   2   4  11   58.19   11.20
  -2   4 -11   62.29   12.80
  -2   4 -11   84.69   15.90
   2   4  11   52.39    7.10
   2  -4  11   75.89   13.40
  -2  -4 -11   48.70   15.00
   2  -4  11   65.39    6.40
  -2  -4 -11   63.69    8.60
   2  -4  11   75.59    8.20
  -2   4 -12  360.76   24.50
  -2   4 -12  364.66   15.90
   2   4  12  379.96   26.70
   2   4  12  379.66   33.20
  -2   4 -12  364.36   28.30
  -2   4 -12  368.26   19.10
  -2   4 -12  384.96   27.70
   2   4  12  345.07   17.90
   2  -4  12  352.76   15.20
   2  -4  12  381.36   26.70
  -2  -4 -12  332.27   32.80
  -2  -4 -12  327.57   20.70
  -2   4 -13    3.80   10.20
  -2   4 -13    2.50   10.00
   2   4  13   -1.20   10.90
  -2   4 -13   11.90   10.30
  -2   4 -13    2.30    3.70
  -2   4 -13   14.90    4.10
   2  -4  13   15.10    4.60
  -2  -4 -13   10.00    4.90
   2  -4  13   -3.90    8.90
  -2  -4 -13    7.60   12.10
  -2   4 -14   25.30    6.90
  -2   4 -14   12.90   12.40
   2   4  14   11.30   13.80
  -2   4 -14   19.70    4.70
  -2   4 -14   10.60   11.70
  -2   4 -14    6.60   11.60
  -2  -4 -14   15.10   14.50
  -2  -4 -14   14.20    5.70
   2  -4  14   16.30    4.30
  -2   4 -15   33.40   16.40
  -2   4 -15   14.70    6.60
  -2   4 -15   13.80   13.50
  -2   4 -15   18.00    4.80
   2   4  15   -5.50   15.20
  -2   4 -15   -2.80   13.80
   2  -4  15   14.60    5.90
  -2  -4 -15    8.70   17.20
  -2  -4 -15    4.60    5.50
  -2   4 -16  232.58   30.90
  -2   4 -16  215.78   31.70
  -2   4 -16  195.48   20.60
  -2   4 -16  194.68   12.60
   2  -4  16  184.58   12.60
  -2  -4 -16  256.77   39.20
  -2  -4 -16  206.98   17.40
  -2   4 -17   44.20    7.40
  -2   4 -17    2.30   17.90
  -2   4 -17   37.40    9.60
  -2   4 -17   20.80   21.60
  -2  -4 -17   57.89   12.00
  -2  -4 -17   42.60   26.70
   2  -4  17   60.69    8.50
  -2   4 -18  104.59   10.70
  -2  -4 -18  121.09   35.10
  -2  -4 -19   47.10   34.50
   2  -5 -20   28.70   31.40
  -2  -5  20    1.40    7.50
   2   5 -19   22.80    6.90
  -2  -5  19   17.00    7.30
   2   5 -18   11.80    5.70
   2   5 -18   18.50    7.50
   2  -5 -18  -14.00   22.20
   2  -5 -18   15.90    7.60
   2   5 -17  316.67   17.50
   2  -5 -17  357.56   43.20
   2  -5 -17  306.47   19.80
   2   5 -16   16.20    5.00
   2   5 -16    9.60    9.40
   2   5 -16   -2.50    9.60
  -2   5  16   15.40   20.70
   2   5 -16   16.10    7.00
   2  -5 -16   30.00   18.00
   2  -5 -16   28.00    7.70
  -2   5  15 1399.36   61.79
   2   5 -15 1326.37   43.70
   2   5 -15 1394.66   61.79
   2   5 -15 1342.37   40.00
   2   5 -15 1394.36   41.80
   2  -5 -15 1436.16   43.70
  -2  -5  15 1429.66   40.40
   2  -5 -15 1393.96   68.79
   2   5 -14   29.90   11.30
  -2   5  14   28.00    2.80
   2   5 -14   20.40    7.40
   2   5 -14   18.30    8.00
   2   5 -14   23.60    6.00
  -2   5  14   10.80   14.70
   2   5 -14   27.60    5.40
  -2   5  14   21.70    2.70
   2  -5 -14   21.10    5.30
  -2  -5  14   19.10    5.20
   2  -5 -14   -3.20   13.50
  -2   5  13  232.18   29.00
  -2   5  13  197.68    7.20
   2   5 -13  205.88   15.00
   2   5 -13  220.48   14.00
  -2   5  13  195.98   23.50
  -2   5  13  189.38   13.50
   2   5 -13  224.18   22.50
   2   5 -13  212.68   12.80
   2   5 -13  196.08   13.80
  -2   5  13  186.68    7.40
   2  -5 -13  191.28   12.90
  -2  -5  13  217.18   18.20
   2  -5 -13  180.38   24.80
  -2   5  12    1.30    1.20
   2   5 -12    2.40    2.70
  -2   5  12   -1.90    3.30
   2   5 -12   -3.80    4.70
   2   5 -12    2.30    4.30
  -2   5  12   -4.10    9.40
   2   5 -12   -1.00    2.60
  -2   5  12    2.20    1.30
   2   5 -12    0.10    5.40
   2  -5 -12   -1.10    9.20
  -2  -5  12   -4.30    3.20
  -2  -5  12    0.30    2.40
   2  -5 -12    1.10    2.90
  -2   5  11  404.76   17.50
  -2   5  11  396.96   11.30
   2   5 -11  381.66   25.70
  -2   5  11  403.36   31.30
  -2   5  11  422.96   12.10
   2   5 -11  399.46   17.00
   2   5 -11  391.36   16.80
   2   5 -11  402.36   15.90
   2   5 -11  425.46   18.50
  -2   5  11  407.06   27.10
   2  -5 -11  416.26   17.50
  -2  -5  11  418.76   16.90
  -2  -5  11  417.56   21.30
   2  -5 -11  369.46   30.40
  -2   5  10   -1.80    2.30
  -2   5  10    5.50    8.70
  -2   5  10    1.40    1.10
   2   5 -10    1.20    2.80
   2   5 -10    1.00    2.40
   2   5 -10    1.30    3.00
   2   5 -10    4.00    2.30
  -2   5  10    0.90    0.90
  -2   5  10    1.30    6.80
   2   5 -10    0.80    4.10
   2  -5 -10    0.50    1.90
  -2  -5  10   -1.50    1.80
   2  -5 -10    1.00    7.00
  -2  -5  10   -3.70    6.90
  -2  -5  10    1.50    2.60
   2   5  -9  890.61   26.80
  -2   5   9  896.21   20.70
  -2   5   9  925.71   26.80
  -2   5   9  904.51   44.10
  -2   5   9  900.51   21.30
   2   5  -9  961.50   37.10
   2   5  -9  937.31   22.50
   2   5  -9  915.31   27.40
   2   5  -9  917.01   23.50
   2  -5  -9  868.21   26.00
  -2  -5   9  912.01   34.60
   2  -5  -9  878.81   43.10
  -2  -5   9  896.51   26.30
  -2  -5   9  868.41   27.20
   2   5  -8   50.69    5.20
   2   5  -8   43.90    5.90
  -2   5   8   51.99    3.30
   2   5  -8   38.40    3.00
  -2   5   8   59.29   13.90
  -2   5   8   50.79    5.00
   2   5  -8   41.90    9.10
   2  -5  -8   38.50   10.50
  -2  -5   8   52.39    5.40
   2  -5  -8   50.59    5.00
  -2  -5   8   36.00    6.70
   2  -5  -8   46.30    3.30
  -2  -5   8   54.69    5.30
  -2   5   7 2895.31   85.69
   2   5  -7 2955.20   64.49
   2   5  -7 2927.61   73.99
   2   5  -7 3019.20   63.99
  -2   5   7 2955.20   62.59
  -2   5   7 2924.81   58.29
   2  -5  -7 2987.30   62.39
   2  -5  -7 3178.28   86.79
  -2  -5   7 2989.90   64.09
   2  -5  -7 2985.20   58.79
  -2  -5   7 2869.61   71.89
  -2  -5   7 3041.10   64.39
  -2   5   6   69.39    3.90
  -2   5   6   75.39    5.10
   2   5  -6   74.29    5.70
   2   5  -6   73.49    8.10
  -2   5   6   54.29    7.20
  -2   5   6   79.19   13.90
   2   5  -6   69.19    5.20
   2  -5  -6   52.19   11.00
  -2  -5   6   76.19    5.60
   2  -5  -6   69.29    3.90
   2  -5  -6   65.69    4.70
  -2  -5   6   69.29    7.80
  -2  -5   6   73.69    5.70
   2   5  -5 4120.79   90.29
   2   5  -5 4090.59   81.99
   2   5  -5 4079.49   84.09
  -2   5   5 4113.29   89.79
  -2   5   5 4141.79   80.89
  -2   5   5 4111.49   79.49
   2  -5  -5 4154.68   80.69
   2  -5  -5 4000.60   79.39
  -2  -5   5 4227.88   88.69
   2  -5  -5 4338.37  113.99
  -2  -5   5 4129.79   82.29
  -2   5   4    2.30    2.20
   2   5  -4    0.00    0.80
   2   5  -4    0.10    2.00
  -2   5   4    0.70    3.80
  -2   5   4    0.10    0.80
   2   5  -4    0.50    1.10
  -2   5   4    0.90    0.60
   2   5  -4    0.50    0.90
  -2  -5   4    0.20    0.80
  -2  -5   4    0.40    0.90
   2  -5  -4   -0.90    3.10
   2  -5  -4    0.20    0.70
   2  -5  -4    0.80    0.80
  -2  -5   4    0.60    2.10
  -2  -5   4    1.50    1.20
  -2   5   3  166.78    6.70
   2   5  -3  174.28    6.50
   2   5  -3  166.68    7.70
  -2   5   3  178.68   10.10
  -2   5   3  148.89   13.20
  -2   5   3  159.38    5.70
   2   5  -3  178.98    9.40
   2   5  -3  177.58    8.10
  -2  -5   3  167.78    8.70
   2  -5  -3  163.08    6.60
  -2  -5   3  173.88    8.10
  -2  -5   3  166.08    7.70
   2  -5  -3  167.98    5.60
   2  -5  -3  173.88   14.10
   2  -5  -3  184.08   10.90
  -2  -5   3  180.48    6.70
  -2   5   2   14.80    2.40
  -2   5   2    9.40    2.80
   2   5  -2   15.20    3.40
   2   5  -2   13.10    2.40
   2   5  -2   14.40    1.60
   2   5  -2    9.30    2.50
  -2   5   2   12.30    1.30
  -2   5   2    9.60    4.60
  -2  -5   2   14.50    1.80
   2  -5  -2   14.50    1.30
  -2  -5   2   11.10    2.70
  -2  -5   2   14.20    2.50
  -2  -5   2   13.10    3.40
   2  -5  -2   13.40    2.20
   2  -5  -2    9.40    3.10
   2  -5  -2   13.10    4.70
   2   5  -1 2009.50   49.70
  -2   5   1 1976.20   38.70
  -2   5   1 2039.00   42.70
  -2   5   1 1970.40   38.50
   2   5  -1 2017.40   39.30
   2   5  -1 2066.89   43.50
  -2   5   1 2026.90   48.10
  -2   5   1 2032.80   54.89
   2   5  -1 1977.40   42.30
  -2  -5   1 2082.89   50.49
   2  -5  -1 1979.00   42.40
   2  -5  -1 2029.40   54.49
  -2  -5   1 2043.40   39.30
   2  -5  -1 1979.50   47.90
  -2  -5   1 2090.79   43.70
  -2  -5   1 2019.00   42.40
  -2   5   0   -1.50    2.40
  -2   5   0    0.30    0.50
   2   5   0    0.50    0.60
  -2   5   0    0.60    0.80
  -2   5   0    0.00    2.00
   2   5   0    1.50    1.20
   2   5   0   -1.10    2.30
   2  -5   0    0.40    2.20
   2  -5   0    0.00    2.20
  -2  -5   0    0.70    1.40
  -2  -5   0    0.70    0.60
  -2  -5   0   -0.30    2.30
   2  -5   0    0.90    0.90
  -2  -5   0    0.30    0.50
  -2  -5   0    0.00    0.60
   2  -5   0    0.60    0.60
  -2   5  -1 6975.70  129.69
   2   5   1 7004.70  146.79
   2   5   1 6855.41  128.89
  -2   5  -1 6750.82  139.49
  -2   5  -1 7029.30  142.99
   2   5   1 6966.20  132.69
   2  -5   1 6985.80  129.79
  -2  -5  -1 6906.41  147.79
  -2  -5  -1 7226.08  133.69
   2  -5   1 7161.48  139.19
   2  -5   1 6884.81  142.69
  -2  -5  -1 6951.90  129.09
  -2   5  -2   -1.70    1.80
   2   5   2   -0.30    0.60
   2   5   2    2.10    3.50
   2   5   2   -0.40    0.40
   2   5   2    1.40    1.40
  -2   5  -2    0.10    0.80
  -2   5  -2   -0.20    2.40
  -2   5  -2   -0.40    0.60
  -2  -5  -2    2.30    3.40
   2  -5   2    1.30    0.90
  -2  -5  -2    0.90    0.70
   2  -5   2    4.60    2.80
   2  -5   2    0.60    2.20
   2  -5   2    0.00    0.80
  -2  -5  -2    0.90    0.70
   2   5   3 5080.19  117.09
  -2   5  -3 5060.49  105.19
   2   5   3 4946.51   93.09
   2   5   3 4880.01   95.49
   2   5   3 5036.90  100.79
  -2   5  -3 4984.10  106.29
  -2   5  -3 4889.91   98.79
  -2   5  -3 4938.41   96.79
   2  -5   3 5113.39  106.29
  -2  -5  -3 4989.70   95.79
   2  -5   3 5139.09  105.29
  -2  -5  -3 5075.39  118.29
   2  -5   3 4940.21   98.49
  -2  -5  -3 4933.41   93.29
   2  -5   3 5046.70   96.79
  -2   5  -4    3.90    2.20
  -2   5  -4    4.30    2.90
  -2   5  -4    4.20    1.60
   2   5   4    1.90    4.40
  -2   5  -4    7.70    2.30
   2   5   4    7.70    2.00
   2   5   4    6.80    1.00
   2  -5   4    5.50    3.10
  -2  -5  -4    6.10    1.70
  -2  -5  -4    6.80    1.00
   2  -5   4    6.90    2.10
   2  -5   4    5.50    3.00
   2  -5   4    7.10    1.90
  -2  -5  -4    6.40    4.90
   2   5   5 2479.45   62.09
  -2   5  -5 2553.14   55.79
  -2   5  -5 2550.54   55.29
   2   5   5 2536.65   53.89
   2   5   5 2630.14   75.49
  -2   5  -5 2595.44   61.69
   2  -5   5 2513.95   54.99
   2  -5   5 2576.24   63.19
  -2  -5  -5 2598.74   54.39
   2  -5   5 2513.65   62.29
  -2  -5  -5 2572.54   76.99
   2  -5   5 2475.45   54.69
  -2   5  -6    3.30    3.70
   2   5   6   12.50    7.20
  -2   5  -6   11.60    3.00
  -2   5  -6    6.50    4.10
  -2   5  -6   13.00    3.00
   2  -5   6   16.30    5.70
  -2  -5  -6    9.20    6.20
   2  -5   6   15.30    3.20
   2  -5   6    9.50    2.40
   2  -5   6    6.10    4.30
  -2  -5  -6    8.00    2.40
  -2   5  -7 1019.00   33.00
  -2   5  -7  981.00   28.40
  -2   5  -7  962.50   27.20
   2   5   7  978.10   44.00
   2   5   7  930.81   26.80
  -2   5  -7  953.90   37.00
   2  -5   7  958.50   26.70
   2  -5   7 1028.80   35.10
  -2  -5  -7  980.40   46.10
  -2  -5  -7 1005.50   27.70
   2  -5   7  985.20   35.00
   2  -5   7 1021.70   28.30
   2   5   8    3.30    5.00
  -2   5  -8    0.10    1.60
  -2   5  -8    1.30    4.40
   2   5   8   -1.70    7.40
  -2   5  -8    0.00    1.90
   2   5   8    0.30    2.00
  -2   5  -8   -1.00    4.40
  -2   5  -8   -3.80    3.90
  -2  -5  -8    3.50    2.10
   2  -5   8    0.60    4.20
   2  -5   8    1.50    2.40
   2  -5   8    2.40    2.00
  -2  -5  -8    5.00    7.30
   2   5   9 1130.69   32.70
  -2   5  -9 1190.48   34.70
  -2   5  -9 1164.78   42.10
  -2   5  -9 1190.58   32.40
  -2   5  -9 1218.08   39.70
   2   5   9 1173.78   42.50
   2   5   9 1205.48   53.09
   2  -5   9 1143.59   31.40
  -2  -5  -9 1138.99   33.40
   2  -5   9 1174.18   33.90
   2  -5   9 1155.18   41.90
  -2  -5  -9 1130.89   54.09
  -2   5 -10   20.90    5.10
  -2   5 -10   17.80    8.20
  -2   5 -10   30.30    5.30
  -2   5 -10   25.20    8.30
   2   5  10   16.00   14.50
   2   5  10   20.00    8.50
  -2   5 -10   23.40    9.60
   2   5  10   16.10    4.30
  -2  -5 -10   13.50    4.20
  -2  -5 -10   12.70    9.50
   2  -5  10   22.60    8.70
   2  -5  10   10.30    7.20
   2  -5  10   15.90    3.90
  -2   5 -11  927.51   28.80
  -2   5 -11  977.40   44.50
  -2   5 -11  940.11   36.80
  -2   5 -11  970.80   41.00
   2   5  11  977.40   41.90
   2   5  11  928.41   49.70
  -2   5 -11 1010.10   33.10
   2   5  11  915.91   30.50
  -2  -5 -11  883.51   50.99
  -2  -5 -11  931.51   31.30
   2  -5  11  927.81   40.50
   2  -5  11  966.10   28.60
   2  -5  11  960.80   31.70
   2   5  12   37.70   17.10
  -2   5 -12   16.10    9.40
  -2   5 -12   25.90    4.90
   2   5  12   36.30   10.90
  -2   5 -12   23.30   10.40
  -2   5 -12   17.40    5.40
   2   5  12   28.00    6.70
  -2   5 -12   19.20    9.90
   2  -5  12   19.00    9.80
   2  -5  12   31.10    5.30
  -2  -5 -12   27.30    6.80
  -2   5 -13   23.10    5.40
  -2   5 -13   20.60    6.50
  -2   5 -13   24.00    9.70
   2   5  13   27.90   13.10
  -2   5 -13   40.70   12.90
  -2   5 -13   25.60   11.10
   2  -5  13   19.70    4.90
  -2  -5 -13   31.30   16.30
  -2  -5 -13   26.60    6.90
  -2   5 -14   13.70    4.30
  -2   5 -14   18.20   12.60
  -2   5 -14   15.10   13.60
   2   5  14    3.50   12.50
  -2   5 -14   19.00    7.00
  -2   5 -14    3.40   11.80
  -2  -5 -14   23.40   16.10
  -2  -5 -14   17.80    6.10
   2  -5  14   10.90    4.40
   2   5  15   -8.60   16.20
  -2   5 -15   72.19   16.20
  -2   5 -15   58.69   17.20
  -2   5 -15   42.70    8.70
  -2   5 -15   44.60   18.10
  -2   5 -15   51.29    7.80
  -2  -5 -15   47.30    9.20
   2  -5  15   60.39    8.50
  -2  -5 -15   48.60   21.00
  -2   5 -16   24.80    5.80
  -2   5 -16   21.60   17.20
  -2   5 -16   22.90    8.00
  -2   5 -16   12.90   17.00
  -2   5 -16   -5.50   14.70
  -2  -5 -16   -2.80   22.90
  -2  -5 -16    9.00    6.30
  -2   5 -17  333.27   23.10
  -2   5 -17  327.17   17.40
  -2   5 -17  303.07   39.70
  -2  -5 -17  306.17   21.80
  -2  -5 -17  347.57   48.70
  -2   5 -18   22.90    6.80
  -2   5 -18    2.40   22.50
  -2  -5 -18   -9.30   29.30
   2   6 -19   14.10    7.00
   2  -6 -19   13.60   28.20
   2   6 -18    6.60    5.40
   2   6 -18    6.60    7.80
   2   6 -18    1.40   12.50
   2  -6 -18   -3.10   24.40
   2  -6 -18   -5.40    6.10
   2   6 -17  166.68   13.30
   2   6 -17  183.38   16.80
   2  -6 -17  144.69   30.80
   2  -6 -17  179.38   15.20
   2   6 -16   -5.30    4.90
   2   6 -16   -0.80    3.60
   2   6 -16   -1.80    7.20
  -2   6  16   16.80   21.80
   2   6 -16    0.70    7.40
   2   6 -16    4.50   12.60
   2  -6 -16    9.70    5.30
   2  -6 -16   -5.90   16.90
   2   6 -15  320.37   17.00
   2   6 -15  333.37   19.80
   2   6 -15  302.97   29.50
   2  -6 -15  251.57   34.60
   2  -6 -15  331.37   18.40
   2   6 -14   53.99    8.10
   2   6 -14   74.79   17.00
   2   6 -14   57.69    7.80
   2   6 -14   58.99    8.60
   2   6 -14   67.59    9.60
  -2   6  14   53.89   15.50
  -2   6  14   61.49    3.50
  -2  -6  14   61.99    8.60
   2  -6 -14   69.49   20.40
   2  -6 -14   80.69    9.00
   2   6 -13   64.39    7.70
  -2   6  13   70.09    3.80
   2   6 -13   60.29   14.00
   2   6 -13   45.70    7.00
  -2   6  13   66.89   20.10
   2   6 -13   52.09    7.80
   2   6 -13   71.99    9.90
  -2   6  13   63.09   15.20
  -2   6  13   76.89    4.10
  -2   6  13   62.39    8.60
   2  -6 -13   56.09    8.00
  -2  -6  13   62.89    7.80
  -2   6  12    8.60   10.80
  -2   6  12    2.50    1.30
   2   6 -12    6.40    3.80
   2   6 -12    3.10    3.70
  -2   6  12   14.80   12.50
  -2   6  12    4.70    1.60
   2   6 -12    4.80    7.30
   2   6 -12    2.40    3.30
   2   6 -12    4.50    2.80
   2  -6 -12    4.90    2.60
   2  -6 -12   -0.90   10.00
  -2  -6  12   12.60    4.40
   2   6 -11   47.70   11.60
   2   6 -11   63.59    8.60
   2   6 -11   55.99    6.50
  -2   6  11   54.79    7.50
   2   6 -11   47.30    5.10
  -2   6  11   56.29    3.60
  -2   6  11   51.89    3.60
  -2   6  11   46.10   13.20
  -2  -6  11   63.49    6.80
   2  -6 -11   31.60   12.50
   2  -6 -11   44.40    6.50
  -2  -6  11   65.39   12.90
  -2   6  10    8.50    1.70
  -2   6  10   11.00    9.60
   2   6 -10   14.80    3.80
   2   6 -10    7.90    3.40
  -2   6  10   10.60    2.00
  -2   6  10    7.80    3.10
  -2   6  10   -0.70    5.50
   2   6 -10   11.00    6.50
   2  -6 -10    5.70    3.00
  -2  -6  10    5.50    3.20
   2  -6 -10   13.50   10.10
  -2  -6  10   12.10    3.40
   2   6  -9  140.49    9.40
   2   6  -9  151.48    9.60
  -2   6   9  145.69    6.20
  -2   6   9  142.09   19.90
   2   6  -9  135.39   14.30
  -2   6   9  125.19    8.50
  -2   6   9  147.79    6.10
   2  -6  -9  139.49    8.60
   2  -6  -9  138.29   18.20
  -2  -6   9  131.49   17.30
  -2  -6   9  146.69    9.60
  -2  -6   9  144.49    9.30
  -2   6   8  269.97    9.00
   2   6  -8  276.07   12.70
  -2   6   8  303.17   25.60
   2   6  -8  278.47   13.20
   2   6  -8  312.77   19.50
  -2   6   8  265.97   11.80
   2  -6  -8  290.97   12.00
   2  -6  -8  268.47   23.40
   2  -6  -8  298.87    9.50
  -2  -6   8  280.57   12.90
  -2  -6   8  279.57   12.90
   2   6  -7  320.07   13.40
  -2   6   7  309.17   11.80
   2   6  -7  302.67   17.90
  -2   6   7  266.47   16.40
  -2   6   7  319.87   24.70
   2   6  -7  297.67   12.40
  -2   6   7  302.57    9.60
  -2  -6   7  294.67   12.80
   2  -6  -7  295.47    9.60
  -2  -6   7  283.77   16.70
   2  -6  -7  313.07   11.70
   2  -6  -7  270.37   22.50
  -2  -6   7  292.77   12.40
  -2   6   6  492.45   29.50
  -2   6   6  502.45   13.80
   2   6  -6  503.05   17.40
   2   6  -6  489.35   21.90
  -2   6   6  497.35   15.10
  -2   6   6  511.85   21.60
   2   6  -6  466.25   15.70
  -2  -6   6  491.35   16.10
   2  -6  -6  501.05   14.90
  -2  -6   6  490.45   17.00
   2  -6  -6  488.55   13.60
   2  -6  -6  565.04   31.30
  -2  -6   6  587.64   32.20
  -2   6   5  114.89    5.70
  -2   6   5   83.09    8.40
   2   6  -5  108.99    6.20
   2   6  -5  114.39    7.20
  -2   6   5  120.59    5.60
  -2   6   5   96.69   13.40
   2   6  -5  123.29    9.60
  -2  -6   5  110.99    7.00
   2  -6  -5  117.69    5.60
  -2  -6   5  113.89    9.20
  -2  -6   5  111.39    6.40
   2  -6  -5  115.19   13.70
   2  -6  -5  120.99    5.60
  -2   6   4   37.70    3.20
  -2   6   4   34.30    2.80
   2   6  -4   37.10    3.30
   2   6  -4   40.00    4.00
  -2   6   4   43.90    7.00
   2   6  -4   33.40    5.70
  -2   6   4   43.30   10.90
  -2  -6   4   30.20    5.10
  -2  -6   4   35.90    3.30
   2  -6  -4   33.70    2.60
   2  -6  -4   34.00    3.10
  -2  -6   4   37.70    3.80
  -2  -6   4   44.40    4.30
  -2   6   3   15.10    2.40
  -2   6   3   14.00    1.50
   2   6  -3   12.30    3.20
  -2   6   3    9.70    2.90
   2   6  -3   10.30    3.00
   2   6  -3   15.10    2.20
   2   6  -3   13.80    2.60
  -2   6   3   17.00    6.60
  -2  -6   3   16.40    3.70
   2  -6  -3   12.50    2.20
   2  -6  -3    6.00    4.60
  -2  -6   3   21.60    2.70
   2  -6  -3   14.00    1.50
  -2  -6   3   14.50    2.90
  -2  -6   3   18.20    4.00
  -2   6   2  167.08    7.40
  -2   6   2  175.68   10.40
  -2   6   2  170.58    5.00
   2   6  -2  173.68    5.80
   2   6  -2  172.98   10.80
   2   6  -2  173.98    8.00
   2   6  -2  177.28    9.20
  -2   6   2  168.98   14.30
   2  -6  -2  186.58   11.40
   2  -6  -2  167.98    7.50
  -2  -6   2  171.18    7.90
  -2  -6   2  166.98   10.60
   2  -6  -2  188.68   14.80
  -2  -6   2  179.78    6.10
   2  -6  -2  169.28    5.00
  -2  -6   2  193.58    9.40
  -2   6   1   10.40    2.30
  -2   6   1    6.50    2.90
   2   6  -1    8.90    3.90
   2   6  -1   10.20    1.40
   2   6  -1    8.80    2.00
  -2   6   1    8.10    4.20
   2   6  -1    7.60    2.40
  -2   6   1    9.00    1.20
  -2   6   1   10.60    1.00
   2  -6  -1   14.30    2.60
  -2  -6   1   10.80    2.30
  -2  -6   1    7.80    2.40
   2  -6  -1    8.20    4.20
  -2  -6   1    9.50    3.70
  -2  -6   1    9.10    1.30
   2  -6  -1    8.00    3.70
  -2   6   0 1750.42   33.90
  -2   6   0 1726.03   33.90
   2   6   0 1717.03   37.40
   2   6   0 1684.63   39.10
   2   6   0 1736.63   49.00
  -2   6   0 1736.93   38.80
  -2   6   0 1737.43   44.10
  -2   6   0 1783.62   50.29
  -2  -6   0 1717.13   49.50
   2  -6   0 1790.22   49.80
  -2  -6   0 1722.33   33.60
   2  -6   0 1815.52   44.80
  -2  -6   0 1654.43   34.00
   2  -6   0 1689.03   38.50
  -2  -6   0 1742.03   39.60
  -2  -6   0 1691.43   37.10
  -2   6  -1   -0.10    3.00
   2   6   1    2.30    1.30
  -2   6  -1    0.20    2.00
  -2   6  -1    1.60    1.20
  -2   6  -1    1.30    0.80
   2   6   1    2.60    3.40
   2   6   1    0.60    0.80
   2  -6   1    1.70    2.90
  -2  -6  -1    0.70    3.40
   2  -6   1   -1.70    1.90
  -2  -6  -1    1.00    0.70
  -2  -6  -1    1.20    0.90
  -2  -6  -1    2.00    2.00
  -2  -6  -1    1.20    0.70
   2  -6   1    0.80    0.70
   2  -6   1   -0.30    0.90
   2   6   2   22.10    2.30
   2   6   2   34.60    8.20
  -2   6  -2   20.90    5.00
  -2   6  -2   27.80    6.20
  -2   6  -2   25.80    3.90
   2   6   2   26.60    4.00
  -2   6  -2   26.90    2.70
   2   6   2   26.80    2.30
  -2  -6  -2   22.20    2.10
   2  -6   2   21.70    5.40
  -2  -6  -2   23.80    2.40
   2  -6   2   24.40    4.90
   2  -6   2   22.60    3.50
   2  -6   2   20.90    2.60
  -2  -6  -2   23.50    7.20
   2   6   3    8.10    1.80
   2   6   3    9.00    1.60
  -2   6  -3    6.20    3.50
  -2   6  -3   10.60    2.20
  -2   6  -3   10.20    2.90
   2   6   3   10.90    3.20
  -2   6  -3    8.00    4.40
  -2  -6  -3    9.10    1.60
   2  -6   3    4.60    3.50
   2  -6   3    5.50    2.90
   2  -6   3   10.20    2.70
  -2  -6  -3    9.90    1.90
   2  -6   3   10.90    2.20
   2   6   4   49.70    5.80
   2   6   4   49.40    2.70
  -2   6  -4   52.39    6.90
   2   6   4   49.10    3.70
   2   6   4   58.89   12.10
  -2   6  -4   71.69   10.70
  -2   6  -4   52.19    4.50
  -2   6  -4   46.20    4.50
  -2  -6  -4   47.20   10.80
   2  -6   4   42.50    4.20
  -2  -6  -4   47.60    3.90
   2  -6   4   59.09    7.50
   2  -6   4   43.50    4.50
   2  -6   4   62.59    9.20
  -2  -6  -4   49.30    2.80
  -2   6  -5    8.70    2.60
   2   6   5    6.80    1.00
   2   6   5    7.70    2.10
  -2   6  -5    6.80    2.20
  -2   6  -5    6.00    3.60
   2   6   5    3.90    5.70
  -2   6  -5    4.90    4.10
   2  -6   5   11.30    5.10
  -2  -6  -5    6.30    1.00
  -2  -6  -5    7.10    5.90
   2  -6   5    5.40    1.80
   2  -6   5    7.50    4.00
  -2  -6  -5    8.80    2.10
   2  -6   5    5.20    1.90
  -2   6  -6  137.09    8.60
   2   6   6  130.69   16.80
  -2   6  -6  115.09   12.10
  -2   6  -6  131.49   10.70
   2   6   6  127.69   11.60
  -2   6  -6  126.89    8.10
   2   6   6  125.49    7.50
  -2  -6  -6  124.29   15.90
  -2  -6  -6  138.39    7.70
   2  -6   6  124.79   12.00
   2  -6   6  123.29    7.90
   2  -6   6  128.89   11.20
   2  -6   6  123.89    7.80
   2   6   7   37.60   11.40
  -2   6  -7   19.80    5.90
  -2   6  -7   40.10    5.00
   2   6   7   32.60    4.70
  -2   6  -7   34.50    5.20
  -2   6  -7   35.30    8.10
   2  -6   7   44.80    6.10
  -2  -6  -7   31.50    4.70
   2  -6   7   25.50    6.80
   2  -6   7   40.00    5.50
   2  -6   7   30.10    7.90
  -2  -6  -7   34.60   11.20
  -2   6  -8    9.70    5.70
  -2   6  -8   10.20    3.00
  -2   6  -8    5.60    4.20
  -2   6  -8    5.30    2.30
   2   6   8   14.20   10.00
  -2   6  -8   10.90    5.50
   2   6   8    8.00    2.80
   2  -6   8   12.10    6.70
   2  -6   8    5.80    2.60
  -2  -6  -8    8.80    2.80
   2  -6   8   10.20    3.00
  -2  -6  -8    3.00    7.50
  -2   6  -9   55.59   10.50
  -2   6  -9   52.39    7.20
  -2   6  -9   43.00   10.30
  -2   6  -9   58.99    6.30
   2   6   9   68.39    6.80
  -2   6  -9   38.60    7.90
   2   6   9   69.99   12.30
   2   6   9   43.10   12.30
  -2  -6  -9   58.49    7.40
   2  -6   9   63.69   12.60
   2  -6   9   60.99    6.30
  -2  -6  -9   51.69   13.80
   2  -6   9   52.89    7.30
  -2   6 -10   21.00    4.60
  -2   6 -10   28.60    5.80
   2   6  10   29.40   14.20
  -2   6 -10   38.20    9.70
   2   6  10   25.70    9.90
   2   6  10   41.90    6.70
  -2   6 -10   30.80    8.20
  -2   6 -10   17.90    7.00
   2  -6  10   33.30   11.30
   2  -6  10   23.50    5.30
   2  -6  10   30.10    5.50
  -2  -6 -10   36.50   14.40
  -2  -6 -10   23.20    5.10
   2   6  11   97.19   21.70
   2   6  11   88.09   14.60
  -2   6 -11   72.29   11.90
  -2   6 -11  127.69    9.50
   2   6  11  125.49   10.30
  -2   6 -11   87.59   14.60
  -2   6 -11  118.49   19.00
  -2   6 -11  107.39   10.20
   2  -6  11  118.69   10.40
  -2  -6 -11  110.89   21.60
   2  -6  11  132.29    9.80
   2  -6  11   53.49   17.70
  -2  -6 -11  107.79    9.70
  -2   6 -12    1.30    7.70
  -2   6 -12    1.00    3.50
  -2   6 -12    1.70    7.90
  -2   6 -12    5.20    3.40
   2   6  12    7.40    4.70
   2   6  12    0.40    9.60
  -2   6 -12    3.00    8.10
  -2  -6 -12    9.70   11.90
  -2  -6 -12   -1.10    3.60
   2  -6  12    1.80    3.40
  -2   6 -13   -0.60    3.80
   2   6  13   -1.40   10.50
  -2   6 -13    1.40   10.20
  -2   6 -13    7.90   10.10
  -2   6 -13    6.00    9.40
  -2   6 -13    4.10    3.40
  -2  -6 -13    0.50    4.20
   2  -6  13    4.70    3.70
  -2  -6 -13  -13.90   12.50
   2   6  14   -2.10   11.70
  -2   6 -14    9.70   12.00
  -2   6 -14   13.80    5.80
  -2   6 -14    7.60   11.60
  -2   6 -14   22.20   14.20
  -2   6 -14   13.00    5.30
   2  -6  14    6.50    4.60
  -2  -6 -14   16.50    6.30
  -2  -6 -14   17.30   18.10
  -2   6 -15   10.40   16.10
   2   6  15  -23.00   16.20
  -2   6 -15   11.70    4.70
  -2   6 -15   10.30    6.60
  -2   6 -15  -11.20   12.10
  -2   6 -15    2.20   13.50
  -2  -6 -15   14.70   19.70
  -2  -6 -15    5.30    5.70
  -2   6 -16   -6.50   15.20
  -2   6 -16   47.30   20.20
  -2   6 -16   41.60   10.40
  -2   6 -16   -4.20   16.60
  -2   6 -16   43.90    8.00
  -2  -6 -16   41.10    8.60
[truncated: 2,303,516 more chars]
