# Supplementary material for: Synthesis, Crystal Structure and Spin-Orbit Coupling Analysis for Mono-Scorpionate Eu(III) Complexes
Source: Preprints.org preprint supplement (doi:10.20944/preprints202308.1806.v1), 2023-08-25
Supplement: Supplementary file 1 [file supplementary › Ppr1a.cif]

data_ppr1a
_audit_creation_date               2023-07-28
_audit_creation_method
;
Olex2 1.5
(compiled 2023.03.06 svn.rbb2c1857 for OlexSys, GUI svn.r6748)
;
_shelx_SHELXL_version_number       '2014/7'
_audit_contact_author_address      ?
_audit_contact_author_email        ?
_audit_contact_author_name         ''
_audit_contact_author_phone        ?
_publ_contact_author_id_orcid      ?
_publ_section_references
;
Dolomanov, O.V., Bourhis, L.J., Gildea, R.J, Howard, J.A.K. & Puschmann, H.
 (2009), J. Appl. Cryst. 42, 339-341.

Sheldrick, G.M. (2015). Acta Cryst. A71, 3-8.

Sheldrick, G.M. (2015). Acta Cryst. C71, 3-8.
;
_chemical_name_common              ?
_chemical_name_systematic          ?
_chemical_formula_moiety           'C10 H12 Eu N9 O10, 2(C2 H3 N)'
_chemical_formula_sum              'C14 H18 Eu N11 O10'
_chemical_formula_weight           652.35
_chemical_melting_point            ?
loop_
  _atom_type_symbol
  _atom_type_description
  _atom_type_scat_dispersion_real
  _atom_type_scat_dispersion_imag
  _atom_type_scat_source
 'C' 'C' 0.0033 0.0016 'International Tables Vol C Tables 4.2.6.8 and 6.1.1.4'
 'H' 'H' 0.0000 0.0000 'International Tables Vol C Tables 4.2.6.8 and 6.1.1.4'
 'Eu' 'Eu' -0.1578 3.6682
 'International Tables Vol C Tables 4.2.6.8 and 6.1.1.4'
 'N' 'N' 0.0061 0.0033 'International Tables Vol C Tables 4.2.6.8 and 6.1.1.4'
 'O' 'O' 0.0106 0.0060 'International Tables Vol C Tables 4.2.6.8 and 6.1.1.4'

_shelx_space_group_comment
;
The symmetry employed for this shelxl refinement is uniquely defined
by the following loop, which should always be used as a source of
symmetry information in preference to the above space-group names.
They are only intended as comments.
;
_space_group_crystal_system        'triclinic'
_space_group_IT_number             2
_space_group_name_H-M_alt          'P -1'
_space_group_name_Hall             '-P 1'
loop_
  _space_group_symop_operation_xyz
 'x, y, z'
 '-x, -y, -z'

_cell_length_a                     9.4083(2)
_cell_length_b                     11.0349(3)
_cell_length_c                     11.7157(3)
_cell_angle_alpha                  99.6960(10)
_cell_angle_beta                   93.4410(10)
_cell_angle_gamma                  102.6850(10)
_cell_volume                       1163.71(5)
_cell_formula_units_Z              2
_cell_measurement_reflns_used      9562
_cell_measurement_temperature      150(2)
_cell_measurement_theta_max        29.62
_cell_measurement_theta_min        2.99
_shelx_estimated_absorpt_T_max     0.769
_shelx_estimated_absorpt_T_min     0.666
_exptl_absorpt_coefficient_mu      2.769
_exptl_absorpt_correction_T_max    0.7459
_exptl_absorpt_correction_T_min    0.6339
_exptl_absorpt_correction_type     multi-scan
_exptl_absorpt_process_details
;
SADABS-2016/2 (Bruker,2016/2) was used for absorption correction.
wR2(int) was 0.0788 before and 0.0408 after correction.
The Ratio of minimum to maximum transmission is 0.8498.
The \l/2 correction factor is Not present.
;
_exptl_absorpt_special_details     ?
_exptl_crystal_colour              colourless
_exptl_crystal_colour_primary      colourless
_exptl_crystal_density_diffrn      1.862
_exptl_crystal_density_meas        .
_exptl_crystal_density_method      ?
_exptl_crystal_description         prism
_exptl_crystal_F_000               644
_exptl_crystal_size_max            0.16
_exptl_crystal_size_mid            0.15
_exptl_crystal_size_min            0.1
_exptl_transmission_factor_max     ?
_exptl_transmission_factor_min     ?
_diffrn_reflns_av_R_equivalents    0.0256
_diffrn_reflns_av_unetI/netI       0.0220
_diffrn_reflns_Laue_measured_fraction_full  0.996
_diffrn_reflns_Laue_measured_fraction_max  0.993
_diffrn_reflns_limit_h_max         13
_diffrn_reflns_limit_h_min         -13
_diffrn_reflns_limit_k_max         15
_diffrn_reflns_limit_k_min         -15
_diffrn_reflns_limit_l_max         16
_diffrn_reflns_limit_l_min         -16
_diffrn_reflns_number              26611
_diffrn_reflns_point_group_measured_fraction_full  0.996
_diffrn_reflns_point_group_measured_fraction_max  0.993
_diffrn_reflns_theta_full          25.242
_diffrn_reflns_theta_max           29.616
_diffrn_reflns_theta_min           2.584
_diffrn_ambient_temperature        150(2)
_diffrn_detector                   PIXEL
_diffrn_detector_area_resol_mean   7.41
_diffrn_detector_type              'Bruker PHOTON III area detector'
_diffrn_measured_fraction_theta_full  0.996
_diffrn_measured_fraction_theta_max  0.993
_diffrn_measurement_device         'three-circle diffractometer'
_diffrn_measurement_device_type    'Bruker D8 Venture diffractometer'
_diffrn_measurement_method         '\w and \f scans'
_diffrn_radiation_monochromator    graphite
_diffrn_radiation_type             'MoK\a'
_diffrn_radiation_wavelength       0.71073
_diffrn_source                     'Incoatec IuS3.0 microfocus X-ray tube'
_diffrn_source_current             1.4
_diffrn_source_power               0.07
_diffrn_source_voltage             50.0
_diffrn_standards_interval_count   .
_diffrn_standards_interval_time    .
_diffrn_standards_number           .
_reflns_Friedel_coverage           0.000
_reflns_Friedel_fraction_full      .
_reflns_Friedel_fraction_max       .
_reflns_number_gt                  6363
_reflns_number_total               6515
_reflns_special_details
;
 Reflections were merged by SHELXL according to the crystal
 class for the calculation of statistics and refinement.
 
 _reflns_Friedel_fraction is defined as the number of unique
 Friedel pairs measured divided by the number that would be
 possible theoretically, ignoring centric projections and
 systematic absences.
;
_reflns_threshold_expression       'I > 2\s(I)'
_computing_cell_refinement         'Bruker SAINT'
_computing_data_collection         'Bruker APEX3'
_computing_data_reduction          'Bruker SAINT'
_computing_molecular_graphics      'Olex2 1.5 (Dolomanov et al., 2009)'
_computing_publication_material    'Olex2 1.5 (Dolomanov et al., 2009)'
_computing_structure_refinement    'SHELXL 2014/7 (Sheldrick, 2015)'
_computing_structure_solution      'SHELXT  (Sheldrick, 2015)'
_refine_diff_density_max           0.418
_refine_diff_density_min           -0.549
_refine_diff_density_rms           0.067
_refine_ls_extinction_coef         .
_refine_ls_extinction_method       none
_refine_ls_goodness_of_fit_ref     1.062
_refine_ls_hydrogen_treatment      mixed
_refine_ls_matrix_type             full
_refine_ls_number_parameters       333
_refine_ls_number_reflns           6515
_refine_ls_number_restraints       3
_refine_ls_R_factor_all            0.0156
_refine_ls_R_factor_gt             0.0151
_refine_ls_restrained_S_all        1.062
_refine_ls_shift/su_max            0.004
_refine_ls_shift/su_mean           0.000
_refine_ls_structure_factor_coef   Fsqd
_refine_ls_weighting_details      
 'w=1/[\s^2^(Fo^2^)+(0.0133P)^2^+0.4800P] where P=(Fo^2^+2Fc^2^)/3'
_refine_ls_weighting_scheme        calc
_refine_ls_wR_factor_gt            0.0357
_refine_ls_wR_factor_ref           0.0360
_refine_special_details            ?
_olex2_refinement_description
;
1. Fixed Uiso
 At 1.2 times of:
  All C(H) groups
 At 1.5 times of:
  All C(H,H,H) groups, All O(H,H) groups
2. Restrained distances
 O10-H10B = O10-H10A
 0.88 with sigma of 0.01
 Eu1-H10A \\sim Eu1-H10B
 with sigma of 0.02
3.a Ternary CH refined with riding coordinates:
 C10(H10)
3.b Aromatic/amide H refined with riding coordinates:
 C1(H1), C2(H2), C3(H3), C4(H4), C5(H5), C6(H6), C7(H7), C8(H8), C9(H9)
3.c Idealised Me refined as rotating group:
 C12(H12A,H12B,H12C), C14(H14A,H14B,H14C)
;
_atom_sites_solution_hydrogens     mixed
_atom_sites_solution_primary       dual
_atom_sites_solution_secondary     ?
loop_
  _atom_site_label
  _atom_site_type_symbol
  _atom_site_fract_x
  _atom_site_fract_y
  _atom_site_fract_z
  _atom_site_U_iso_or_equiv
  _atom_site_adp_type
  _atom_site_occupancy
  _atom_site_site_symmetry_order
  _atom_site_calc_flag
  _atom_site_refinement_flags_posn
  _atom_site_refinement_flags_adp
  _atom_site_refinement_flags_occupancy
  _atom_site_disorder_assembly
  _atom_site_disorder_group
 Eu1 Eu 0.51725(2) 0.29076(2) 0.29523(2) 0.01232(2) Uani 1 1 d D . . . .
 O1 O 0.48787(13) 0.20344(10) 0.48450(9) 0.0224(2) Uani 1 1 d . . . . .
 O2 O 0.64755(12) 0.37880(10) 0.49260(9) 0.0191(2) Uani 1 1 d . . . . .
 O3 O 0.62736(14) 0.29055(12) 0.64586(10) 0.0293(3) Uani 1 1 d . . . . .
 O4 O 0.58452(12) 0.52850(10) 0.34086(9) 0.0199(2) Uani 1 1 d . . . . .
 O5 O 0.50350(13) 0.44085(10) 0.16336(10) 0.0242(2) Uani 1 1 d . . . . .
 O6 O 0.60714(17) 0.64161(11) 0.20431(12) 0.0354(3) Uani 1 1 d . . . . .
 O7 O 0.28498(11) 0.22413(10) 0.15826(10) 0.0214(2) Uani 1 1 d . . . . .
 O8 O 0.31778(12) 0.09397(11) 0.27000(11) 0.0249(2) Uani 1 1 d . . . . .
 O9 O 0.11196(13) 0.05713(12) 0.16006(14) 0.0367(3) Uani 1 1 d . . . . .
 O10 O 0.32436(12) 0.36770(10) 0.39016(10) 0.0204(2) Uani 1 1 d D . . . .
 H10A H 0.343(2) 0.4438(11) 0.4288(16) 0.031 Uiso 1 1 d D U . . .
 H10B H 0.2574(17) 0.3191(16) 0.4189(17) 0.031 Uiso 1 1 d D U . . .
 N1 N 0.79108(13) 0.37121(11) 0.27189(11) 0.0167(2) Uani 1 1 d . . . . .
 N2 N 0.87715(13) 0.30061(11) 0.21616(10) 0.0155(2) Uani 1 1 d . . . . .
 N3 N 0.57417(13) 0.19889(12) 0.08899(10) 0.0171(2) Uani 1 1 d . . . . .
 N4 N 0.70397(13) 0.17115(12) 0.06302(10) 0.0165(2) Uani 1 1 d . . . . .
 N5 N 0.65784(13) 0.11424(12) 0.30249(11) 0.0172(2) Uani 1 1 d . . . . .
 N6 N 0.76090(13) 0.08948(11) 0.23104(11) 0.0171(2) Uani 1 1 d . . . . .
 N7 N 0.58759(14) 0.29003(12) 0.54469(11) 0.0182(2) Uani 1 1 d . . . . .
 N8 N 0.56584(15) 0.54116(12) 0.23509(12) 0.0206(3) Uani 1 1 d . . . . .
 N9 N 0.23483(14) 0.12319(12) 0.19480(12) 0.0218(3) Uani 1 1 d . . . . .
 C1 C 0.88460(16) 0.47891(14) 0.32229(14) 0.0209(3) Uani 1 1 d . . . . .
 H1 H 0.8568 0.5478 0.3683 0.025 Uiso 1 1 calc R U . . .
 C2 C 1.02871(17) 0.47823(15) 0.29931(15) 0.0253(3) Uani 1 1 d . . . . .
 H2 H 1.1140 0.5439 0.3251 0.030 Uiso 1 1 calc R U . . .
 C3 C 1.02011(16) 0.36252(14) 0.23161(14) 0.0207(3) Uani 1 1 d . . . . .
 H3 H 1.0994 0.3315 0.2012 0.025 Uiso 1 1 calc R U . . .
 C4 C 0.50532(17) 0.19875(15) -0.01386(13) 0.0212(3) Uani 1 1 d . . . . .
 H4 H 0.4108 0.2151 -0.0240 0.025 Uiso 1 1 calc R U . . .
 C5 C 0.58975(18) 0.17137(16) -0.10519(13) 0.0247(3) Uani 1 1 d . . . . .
 H5 H 0.5644 0.1655 -0.1860 0.030 Uiso 1 1 calc R U . . .
 C6 C 0.71656(17) 0.15488(15) -0.05308(13) 0.0213(3) Uani 1 1 d . . . . .
 H6 H 0.7977 0.1358 -0.0909 0.026 Uiso 1 1 calc R U . . .
 C7 C 0.63018(17) 0.01589(14) 0.35698(13) 0.0202(3) Uani 1 1 d . . . . .
 H7 H 0.5616 0.0060 0.4130 0.024 Uiso 1 1 calc R U . . .
 C8 C 0.71440(17) -0.07085(14) 0.32153(15) 0.0230(3) Uani 1 1 d . . . . .
 H8 H 0.7148 -0.1475 0.3481 0.028 Uiso 1 1 calc R U . . .
 C9 C 0.79631(16) -0.02149(14) 0.24017(14) 0.0207(3) Uani 1 1 d . . . . .
 H9 H 0.8647 -0.0579 0.1982 0.025 Uiso 1 1 calc R U . . .
 C10 C 0.81601(15) 0.17317(13) 0.15332(12) 0.0164(3) Uani 1 1 d . . . . .
 H10 H 0.8966 0.1418 0.1151 0.020 Uiso 1 1 calc R U . . .
 N10 N 0.0738(2) 0.21908(17) 0.47657(17) 0.0424(4) Uani 1 1 d . . . . .
 C11 C -0.00521(19) 0.17864(16) 0.53751(16) 0.0290(3) Uani 1 1 d . . . . .
 C12 C -0.1034(2) 0.1271(2) 0.61766(18) 0.0374(4) Uani 1 1 d . . . . .
 H12A H -0.1235 0.0346 0.6002 0.056 Uiso 1 1 calc R U . . .
 H12B H -0.1954 0.1541 0.6091 0.056 Uiso 1 1 calc R U . . .
 H12C H -0.0575 0.1579 0.6977 0.056 Uiso 1 1 calc R U . . .
 N11 N 0.9358(2) 0.72805(19) 0.08443(19) 0.0514(5) Uani 1 1 d . . . . .
 C13 C 0.8669(2) 0.62991(19) 0.04590(17) 0.0331(4) Uani 1 1 d . . . . .
 C14 C 0.7794(2) 0.50461(18) -0.00424(18) 0.0357(4) Uani 1 1 d . . . . .
 H14A H 0.8299 0.4648 -0.0656 0.054 Uiso 1 1 calc R U . . .
 H14B H 0.6839 0.5112 -0.0375 0.054 Uiso 1 1 calc R U . . .
 H14C H 0.7653 0.4531 0.0565 0.054 Uiso 1 1 calc R U . . .

loop_
  _atom_site_aniso_label
  _atom_site_aniso_U_11
  _atom_site_aniso_U_22
  _atom_site_aniso_U_33
  _atom_site_aniso_U_23
  _atom_site_aniso_U_13
  _atom_site_aniso_U_12
 Eu1 0.01119(3) 0.01263(4) 0.01342(4) 0.00207(2) 0.00297(2) 0.00325(2)
 O1 0.0277(6) 0.0180(5) 0.0211(5) 0.0040(4) 0.0064(4) 0.0035(4)
 O2 0.0207(5) 0.0203(5) 0.0161(5) 0.0041(4) 0.0040(4) 0.0033(4)
 O3 0.0337(7) 0.0422(7) 0.0171(5) 0.0119(5) 0.0026(5) 0.0150(5)
 O4 0.0225(5) 0.0186(5) 0.0198(5) 0.0038(4) 0.0047(4) 0.0067(4)
 O5 0.0325(6) 0.0189(5) 0.0205(5) 0.0041(4) -0.0002(4) 0.0054(4)
 O6 0.0562(9) 0.0171(6) 0.0372(7) 0.0116(5) 0.0196(6) 0.0089(5)
 O7 0.0156(5) 0.0229(5) 0.0250(5) 0.0026(4) 0.0021(4) 0.0042(4)
 O8 0.0191(5) 0.0203(5) 0.0346(6) 0.0057(5) 0.0019(4) 0.0029(4)
 O9 0.0133(5) 0.0274(6) 0.0624(9) -0.0015(6) -0.0019(5) -0.0007(5)
 O10 0.0179(5) 0.0186(5) 0.0244(5) 0.0003(4) 0.0085(4) 0.0050(4)
 N1 0.0144(5) 0.0162(6) 0.0196(6) 0.0010(5) 0.0047(4) 0.0049(4)
 N2 0.0117(5) 0.0166(6) 0.0185(6) 0.0025(5) 0.0034(4) 0.0038(4)
 N3 0.0146(5) 0.0205(6) 0.0168(6) 0.0012(5) 0.0025(4) 0.0069(4)
 N4 0.0152(5) 0.0195(6) 0.0151(5) 0.0012(4) 0.0038(4) 0.0058(4)
 N5 0.0172(6) 0.0177(6) 0.0188(6) 0.0049(5) 0.0053(4) 0.0064(4)
 N6 0.0160(6) 0.0160(6) 0.0214(6) 0.0043(5) 0.0043(4) 0.0069(4)
 N7 0.0200(6) 0.0212(6) 0.0170(6) 0.0051(5) 0.0056(4) 0.0104(5)
 N8 0.0233(6) 0.0168(6) 0.0245(6) 0.0044(5) 0.0093(5) 0.0083(5)
 N9 0.0129(6) 0.0191(6) 0.0308(7) -0.0037(5) 0.0041(5) 0.0040(5)
 C1 0.0173(7) 0.0177(7) 0.0248(7) -0.0011(6) 0.0019(5) 0.0022(5)
 C2 0.0141(7) 0.0227(8) 0.0355(9) 0.0021(6) -0.0003(6) -0.0002(6)
 C3 0.0114(6) 0.0230(7) 0.0287(8) 0.0076(6) 0.0036(5) 0.0036(5)
 C4 0.0204(7) 0.0243(8) 0.0173(7) 0.0003(6) -0.0008(5) 0.0055(6)
 C5 0.0269(8) 0.0299(8) 0.0150(7) 0.0004(6) 0.0013(6) 0.0051(6)
 C6 0.0233(7) 0.0220(7) 0.0164(7) -0.0014(5) 0.0065(5) 0.0032(6)
 C7 0.0219(7) 0.0176(7) 0.0217(7) 0.0061(6) 0.0030(5) 0.0041(5)
 C8 0.0227(7) 0.0162(7) 0.0311(8) 0.0070(6) -0.0012(6) 0.0055(6)
 C9 0.0174(7) 0.0158(7) 0.0297(8) 0.0033(6) 0.0000(6) 0.0072(5)
 C10 0.0142(6) 0.0167(6) 0.0190(6) 0.0025(5) 0.0041(5) 0.0052(5)
 N10 0.0392(9) 0.0350(9) 0.0546(11) 0.0131(8) 0.0155(8) 0.0058(7)
 C11 0.0260(8) 0.0253(8) 0.0360(9) 0.0052(7) 0.0017(7) 0.0075(6)
 C12 0.0327(10) 0.0468(11) 0.0389(10) 0.0166(9) 0.0100(8) 0.0143(8)
 N11 0.0362(10) 0.0462(11) 0.0641(13) 0.0013(9) 0.0093(9) -0.0007(8)
 C13 0.0259(9) 0.0409(10) 0.0348(9) 0.0102(8) 0.0081(7) 0.0090(8)
 C14 0.0336(10) 0.0353(10) 0.0379(10) 0.0085(8) 0.0084(8) 0.0049(8)

_geom_special_details
;
 All esds (except the esd in the dihedral angle between two l.s. planes)
 are estimated using the full covariance matrix.  The cell esds are taken
 into account individually in the estimation of esds in distances, angles
 and torsion angles; correlations between esds in cell parameters are only
 used when they are defined by crystal symmetry.  An approximate (isotropic)
 treatment of cell esds is used for estimating esds involving l.s. planes.
;
loop_
  _geom_bond_atom_site_label_1
  _geom_bond_atom_site_label_2
  _geom_bond_distance
  _geom_bond_site_symmetry_2
  _geom_bond_publ_flag
 Eu1 O1 2.5687(11) . ?
 Eu1 O2 2.4846(10) . ?
 Eu1 O4 2.5153(11) . ?
 Eu1 O5 2.4655(11) . ?
 Eu1 O7 2.5234(11) . ?
 Eu1 O8 2.5005(11) . ?
 Eu1 O10 2.4191(11) . ?
 Eu1 N1 2.5810(12) . ?
 Eu1 N3 2.5926(12) . ?
 Eu1 N5 2.5932(12) . ?
 O1 N7 1.2611(17) . ?
 O2 N7 1.2846(16) . ?
 O3 N7 1.2201(16) . ?
 O4 N8 1.2763(17) . ?
 O5 N8 1.2719(17) . ?
 O6 N8 1.2132(17) . ?
 O7 N9 1.2652(17) . ?
 O8 N9 1.2699(17) . ?
 O9 N9 1.2275(17) . ?
 O10 H10A 0.860(9) . ?
 O10 H10B 0.858(9) . ?
 N1 N2 1.3632(16) . ?
 N1 C1 1.3331(19) . ?
 N2 C3 1.3543(18) . ?
 N2 C10 1.4476(18) . ?
 N3 N4 1.3620(16) . ?
 N3 C4 1.3329(19) . ?
 N4 C6 1.3575(18) . ?
 N4 C10 1.4418(18) . ?
 N5 N6 1.3609(17) . ?
 N5 C7 1.3351(19) . ?
 N6 C9 1.3568(18) . ?
 N6 C10 1.4424(18) . ?
 C1 H1 0.9500 . ?
 C1 C2 1.399(2) . ?
 C2 H2 0.9500 . ?
 C2 C3 1.368(2) . ?
 C3 H3 0.9500 . ?
 C4 H4 0.9500 . ?
 C4 C5 1.402(2) . ?
 C5 H5 0.9500 . ?
 C5 C6 1.369(2) . ?
 C6 H6 0.9500 . ?
 C7 H7 0.9500 . ?
 C7 C8 1.398(2) . ?
 C8 H8 0.9500 . ?
 C8 C9 1.370(2) . ?
 C9 H9 0.9500 . ?
 C10 H10 1.0000 . ?
 N10 C11 1.135(2) . ?
 C11 C12 1.453(3) . ?
 C12 H12A 0.9800 . ?
 C12 H12B 0.9800 . ?
 C12 H12C 0.9800 . ?
 N11 C13 1.135(3) . ?
 C13 C14 1.450(3) . ?
 C14 H14A 0.9800 . ?
 C14 H14B 0.9800 . ?
 C14 H14C 0.9800 . ?

loop_
  _geom_angle_atom_site_label_1
  _geom_angle_atom_site_label_2
  _geom_angle_atom_site_label_3
  _geom_angle
  _geom_angle_site_symmetry_1
  _geom_angle_site_symmetry_3
  _geom_angle_publ_flag
 O1 Eu1 N1 110.28(4) . . ?
 O1 Eu1 N3 133.71(4) . . ?
 O1 Eu1 N5 68.62(4) . . ?
 O2 Eu1 O1 50.52(3) . . ?
 O2 Eu1 O4 66.59(3) . . ?
 O2 Eu1 O7 150.74(4) . . ?
 O2 Eu1 O8 118.17(4) . . ?
 O2 Eu1 N1 72.19(4) . . ?
 O2 Eu1 N3 139.02(4) . . ?
 O2 Eu1 N5 83.56(4) . . ?
 O4 Eu1 O1 109.84(3) . . ?
 O4 Eu1 O7 107.44(4) . . ?
 O4 Eu1 N1 70.43(4) . . ?
 O4 Eu1 N3 112.98(4) . . ?
 O4 Eu1 N5 135.18(4) . . ?
 O5 Eu1 O1 156.11(4) . . ?
 O5 Eu1 O2 117.21(4) . . ?
 O5 Eu1 O4 51.29(4) . . ?
 O5 Eu1 O7 67.72(4) . . ?
 O5 Eu1 O8 118.43(4) . . ?
 O5 Eu1 N1 79.21(4) . . ?
 O5 Eu1 N3 69.85(4) . . ?
 O5 Eu1 N5 134.39(4) . . ?
 O7 Eu1 O1 112.44(4) . . ?
 O7 Eu1 N1 134.73(4) . . ?
 O7 Eu1 N3 70.22(4) . . ?
 O7 Eu1 N5 114.30(4) . . ?
 O8 Eu1 O1 67.72(4) . . ?
 O8 Eu1 O4 146.79(4) . . ?
 O8 Eu1 O7 50.84(4) . . ?
 O8 Eu1 N1 142.62(4) . . ?
 O8 Eu1 N3 85.12(4) . . ?
 O8 Eu1 N5 76.46(4) . . ?
 O10 Eu1 O1 71.80(4) . . ?
 O10 Eu1 O2 80.54(4) . . ?
 O10 Eu1 O4 70.32(4) . . ?
 O10 Eu1 O5 86.56(4) . . ?
 O10 Eu1 O7 70.78(4) . . ?
 O10 Eu1 O8 77.98(4) . . ?
 O10 Eu1 N1 138.57(4) . . ?
 O10 Eu1 N3 139.76(4) . . ?
 O10 Eu1 N5 138.64(4) . . ?
 N1 Eu1 N3 69.84(4) . . ?
 N1 Eu1 N5 68.94(4) . . ?
 N3 Eu1 N5 68.98(4) . . ?
 N7 O1 Eu1 95.04(8) . . ?
 N7 O2 Eu1 98.41(8) . . ?
 N8 O4 Eu1 94.69(8) . . ?
 N8 O5 Eu1 97.18(8) . . ?
 N9 O7 Eu1 95.66(8) . . ?
 N9 O8 Eu1 96.63(8) . . ?
 Eu1 O10 H10A 119.3(12) . . ?
 Eu1 O10 H10B 121.9(13) . . ?
 H10A O10 H10B 111(2) . . ?
 N2 N1 Eu1 125.28(8) . . ?
 C1 N1 Eu1 129.88(10) . . ?
 C1 N1 N2 104.20(12) . . ?
 N1 N2 C10 121.26(11) . . ?
 C3 N2 N1 111.95(12) . . ?
 C3 N2 C10 126.74(12) . . ?
 N4 N3 Eu1 124.85(9) . . ?
 C4 N3 Eu1 128.70(10) . . ?
 C4 N3 N4 104.44(12) . . ?
 N3 N4 C10 121.32(11) . . ?
 C6 N4 N3 111.98(12) . . ?
 C6 N4 C10 126.40(13) . . ?
 N6 N5 Eu1 125.08(9) . . ?
 C7 N5 Eu1 129.53(10) . . ?
 C7 N5 N6 104.29(12) . . ?
 N5 N6 C10 121.12(12) . . ?
 C9 N6 N5 111.99(12) . . ?
 C9 N6 C10 126.83(13) . . ?
 O1 N7 Eu1 59.84(7) . . ?
 O1 N7 O2 115.88(12) . . ?
 O2 N7 Eu1 56.16(7) . . ?
 O3 N7 Eu1 175.16(10) . . ?
 O3 N7 O1 123.03(13) . . ?
 O3 N7 O2 121.08(13) . . ?
 O4 N8 Eu1 59.41(7) . . ?
 O5 N8 Eu1 57.14(7) . . ?
 O5 N8 O4 115.59(12) . . ?
 O6 N8 Eu1 169.43(11) . . ?
 O6 N8 O4 122.38(14) . . ?
 O6 N8 O5 122.01(13) . . ?
 O7 N9 Eu1 58.91(7) . . ?
 O7 N9 O8 116.58(12) . . ?
 O8 N9 Eu1 57.89(7) . . ?
 O9 N9 Eu1 175.05(11) . . ?
 O9 N9 O7 121.83(14) . . ?
 O9 N9 O8 121.59(14) . . ?
 N1 C1 H1 124.1 . . ?
 N1 C1 C2 111.82(14) . . ?
 C2 C1 H1 124.1 . . ?
 C1 C2 H2 127.5 . . ?
 C3 C2 C1 105.07(13) . . ?
 C3 C2 H2 127.5 . . ?
 N2 C3 C2 106.95(13) . . ?
 N2 C3 H3 126.5 . . ?
 C2 C3 H3 126.5 . . ?
 N3 C4 H4 124.2 . . ?
 N3 C4 C5 111.56(14) . . ?
 C5 C4 H4 124.2 . . ?
 C4 C5 H5 127.4 . . ?
 C6 C5 C4 105.29(13) . . ?
 C6 C5 H5 127.4 . . ?
 N4 C6 C5 106.72(13) . . ?
 N4 C6 H6 126.6 . . ?
 C5 C6 H6 126.6 . . ?
 N5 C7 H7 124.1 . . ?
 N5 C7 C8 111.75(14) . . ?
 C8 C7 H7 124.1 . . ?
 C7 C8 H8 127.4 . . ?
 C9 C8 C7 105.16(13) . . ?
 C9 C8 H8 127.4 . . ?
 N6 C9 C8 106.79(13) . . ?
 N6 C9 H9 126.6 . . ?
 C8 C9 H9 126.6 . . ?
 N2 C10 H10 107.7 . . ?
 N4 C10 N2 111.11(11) . . ?
 N4 C10 N6 111.11(11) . . ?
 N4 C10 H10 107.7 . . ?
 N6 C10 N2 111.33(11) . . ?
 N6 C10 H10 107.7 . . ?
 N10 C11 C12 178.6(2) . . ?
 C11 C12 H12A 109.5 . . ?
 C11 C12 H12B 109.5 . . ?
 C11 C12 H12C 109.5 . . ?
 H12A C12 H12B 109.5 . . ?
 H12A C12 H12C 109.5 . . ?
 H12B C12 H12C 109.5 . . ?
 N11 C13 C14 179.5(2) . . ?
 C13 C14 H14A 109.5 . . ?
 C13 C14 H14B 109.5 . . ?
 C13 C14 H14C 109.5 . . ?
 H14A C14 H14B 109.5 . . ?
 H14A C14 H14C 109.5 . . ?
 H14B C14 H14C 109.5 . . ?

loop_
  _geom_torsion_atom_site_label_1
  _geom_torsion_atom_site_label_2
  _geom_torsion_atom_site_label_3
  _geom_torsion_atom_site_label_4
  _geom_torsion
  _geom_torsion_site_symmetry_1
  _geom_torsion_site_symmetry_2
  _geom_torsion_site_symmetry_3
  _geom_torsion_site_symmetry_4
  _geom_torsion_publ_flag
 Eu1 O1 N7 O2 3.82(12) . . . . ?
 Eu1 O1 N7 O3 -175.42(12) . . . . ?
 Eu1 O2 N7 O1 -3.98(13) . . . . ?
 Eu1 O2 N7 O3 175.28(11) . . . . ?
 Eu1 O4 N8 O5 10.89(13) . . . . ?
 Eu1 O4 N8 O6 -167.78(13) . . . . ?
 Eu1 O5 N8 O4 -11.16(13) . . . . ?
 Eu1 O5 N8 O6 167.51(13) . . . . ?
 Eu1 O7 N9 O8 -5.29(13) . . . . ?
 Eu1 O7 N9 O9 174.26(13) . . . . ?
 Eu1 O8 N9 O7 5.35(13) . . . . ?
 Eu1 O8 N9 O9 -174.20(13) . . . . ?
 Eu1 N1 N2 C3 -171.43(10) . . . . ?
 Eu1 N1 N2 C10 6.32(17) . . . . ?
 Eu1 N1 C1 C2 171.17(11) . . . . ?
 Eu1 N3 N4 C6 -164.61(10) . . . . ?
 Eu1 N3 N4 C10 9.56(17) . . . . ?
 Eu1 N3 C4 C5 164.16(11) . . . . ?
 Eu1 N5 N6 C9 -168.73(10) . . . . ?
 Eu1 N5 N6 C10 8.73(18) . . . . ?
 Eu1 N5 C7 C8 168.48(10) . . . . ?
 N1 N2 C3 C2 -0.35(17) . . . . ?
 N1 N2 C10 N4 58.44(16) . . . . ?
 N1 N2 C10 N6 -65.98(16) . . . . ?
 N1 C1 C2 C3 -0.39(19) . . . . ?
 N2 N1 C1 C2 0.18(17) . . . . ?
 N3 N4 C6 C5 -0.59(17) . . . . ?
 N3 N4 C10 N2 -67.82(16) . . . . ?
 N3 N4 C10 N6 56.72(17) . . . . ?
 N3 C4 C5 C6 -0.28(19) . . . . ?
 N4 N3 C4 C5 -0.07(17) . . . . ?
 N5 N6 C9 C8 -0.59(17) . . . . ?
 N5 N6 C10 N2 56.82(17) . . . . ?
 N5 N6 C10 N4 -67.60(16) . . . . ?
 N5 C7 C8 C9 -0.53(18) . . . . ?
 N6 N5 C7 C8 0.18(17) . . . . ?
 C1 N1 N2 C3 0.10(16) . . . . ?
 C1 N1 N2 C10 177.85(13) . . . . ?
 C1 C2 C3 N2 0.43(18) . . . . ?
 C3 N2 C10 N4 -124.17(15) . . . . ?
 C3 N2 C10 N6 111.41(15) . . . . ?
 C4 N3 N4 C6 0.41(16) . . . . ?
 C4 N3 N4 C10 174.58(13) . . . . ?
 C4 C5 C6 N4 0.51(18) . . . . ?
 C6 N4 C10 N2 105.46(16) . . . . ?
 C6 N4 C10 N6 -130.00(15) . . . . ?
 C7 N5 N6 C9 0.25(16) . . . . ?
 C7 N5 N6 C10 177.70(13) . . . . ?
 C7 C8 C9 N6 0.65(17) . . . . ?
 C9 N6 C10 N2 -126.13(15) . . . . ?
 C9 N6 C10 N4 109.45(16) . . . . ?
 C10 N2 C3 C2 -177.94(14) . . . . ?
 C10 N4 C6 C5 -174.40(14) . . . . ?
 C10 N6 C9 C8 -177.86(14) . . . . ?

_shelx_res_file
;
    ppr1a.res created by SHELXL-2014/7

TITL ppr1a_a.res in P-1
REM Old TITL Ppr1a in P1
REM SHELXT solution in P-1
REM R1 0.048, Rweak 0.012, Alpha 0.041, Orientation as input
REM Formula found by SHELXT: C21 N5 O9 Eu
CELL 0.71073 9.4083 11.0349 11.7157 99.696 93.441 102.685
ZERR 2 0.0002 0.0003 0.0003 0.001 0.001 0.001
LATT 1
SFAC C H Eu N O
UNIT 28 36 2 22 20
SADI Eu1 H10a Eu1 H10b
DFIX 0.88 0.01 O10 H10b O10 H10a

L.S. 4 0 0
PLAN  5
SIZE 0.16 0.15 0.1
TEMP -123(2)
CONF
CONN 10 Eu1
list 4
MORE -1
BOND $H
fmap 2 53
ACTA
OMIT 0 0 1
OMIT 0 1 0
REM <olex2.extras>
REM <HklSrc "%.\\mo_ppr1a_0m.hkl">
REM </olex2.extras>

WGHT    0.013300    0.480000
FVAR       0.55302
EU1   3    0.517251    0.290762    0.295231    11.00000    0.01119    0.01263 =
         0.01342    0.00207    0.00297    0.00325
O1    5    0.487866    0.203436    0.484496    11.00000    0.02768    0.01805 =
         0.02111    0.00404    0.00644    0.00349
O2    5    0.647549    0.378800    0.492597    11.00000    0.02073    0.02029 =
         0.01613    0.00415    0.00400    0.00333
O3    5    0.627359    0.290552    0.645860    11.00000    0.03370    0.04218 =
         0.01709    0.01192    0.00262    0.01497
O4    5    0.584523    0.528503    0.340855    11.00000    0.02250    0.01861 =
         0.01983    0.00380    0.00472    0.00671
O5    5    0.503502    0.440851    0.163364    11.00000    0.03251    0.01892 =
         0.02054    0.00410   -0.00018    0.00540
O6    5    0.607139    0.641607    0.204306    11.00000    0.05618    0.01709 =
         0.03718    0.01164    0.01957    0.00889
O7    5    0.284977    0.224127    0.158256    11.00000    0.01562    0.02291 =
         0.02498    0.00256    0.00214    0.00423
O8    5    0.317782    0.093973    0.269997    11.00000    0.01912    0.02027 =
         0.03463    0.00570    0.00189    0.00290
O9    5    0.111958    0.057129    0.160056    11.00000    0.01329    0.02739 =
         0.06241   -0.00153   -0.00195   -0.00074
O10   5    0.324355    0.367696    0.390164    11.00000    0.01793    0.01865 =
         0.02437    0.00032    0.00854    0.00497
H10A  2    0.342977    0.443817    0.428816    11.00000   -1.50000
H10B  2    0.257399    0.319092    0.418873    11.00000   -1.50000
N1    4    0.791078    0.371215    0.271891    11.00000    0.01444    0.01618 =
         0.01955    0.00101    0.00473    0.00490
N2    4    0.877147    0.300612    0.216159    11.00000    0.01168    0.01664 =
         0.01848    0.00252    0.00335    0.00379
N3    4    0.574166    0.198890    0.088986    11.00000    0.01464    0.02049 =
         0.01679    0.00116    0.00254    0.00691
N4    4    0.703970    0.171149    0.063020    11.00000    0.01523    0.01947 =
         0.01508    0.00117    0.00382    0.00577
N5    4    0.657841    0.114243    0.302490    11.00000    0.01720    0.01773 =
         0.01882    0.00489    0.00533    0.00637
N6    4    0.760896    0.089484    0.231042    11.00000    0.01601    0.01601 =
         0.02139    0.00425    0.00431    0.00690
N7    4    0.587588    0.290028    0.544686    11.00000    0.01998    0.02120 =
         0.01700    0.00512    0.00562    0.01036
N8    4    0.565842    0.541161    0.235087    11.00000    0.02334    0.01680 =
         0.02451    0.00440    0.00929    0.00829
N9    4    0.234827    0.123185    0.194804    11.00000    0.01289    0.01912 =
         0.03078   -0.00370    0.00411    0.00400
C1    1    0.884601    0.478910    0.322294    11.00000    0.01734    0.01766 =
         0.02485   -0.00107    0.00187    0.00216
AFIX  43
H1    2    0.856783    0.547784    0.368257    11.00000   -1.20000
AFIX   0
C2    1    1.028714    0.478234    0.299307    11.00000    0.01410    0.02268 =
         0.03546    0.00207   -0.00025   -0.00019
AFIX  43
H2    2    1.114034    0.543903    0.325118    11.00000   -1.20000
AFIX   0
C3    1    1.020115    0.362519    0.231613    11.00000    0.01139    0.02297 =
         0.02873    0.00760    0.00365    0.00363
AFIX  43
H3    2    1.099350    0.331497    0.201231    11.00000   -1.20000
AFIX   0
C4    1    0.505316    0.198748   -0.013863    11.00000    0.02037    0.02432 =
         0.01731    0.00030   -0.00077    0.00553
AFIX  43
H4    2    0.410821    0.215149   -0.024015    11.00000   -1.20000
AFIX   0
C5    1    0.589749    0.171375   -0.105193    11.00000    0.02688    0.02995 =
         0.01497    0.00037    0.00131    0.00510
AFIX  43
H5    2    0.564389    0.165520   -0.185982    11.00000   -1.20000
AFIX   0
C6    1    0.716561    0.154883   -0.053078    11.00000    0.02334    0.02204 =
         0.01644   -0.00139    0.00649    0.00324
AFIX  43
H6    2    0.797665    0.135758   -0.090857    11.00000   -1.20000
AFIX   0
C7    1    0.630175    0.015886    0.356980    11.00000    0.02194    0.01764 =
         0.02166    0.00611    0.00304    0.00412
AFIX  43
H7    2    0.561631    0.006034    0.413000    11.00000   -1.20000
AFIX   0
C8    1    0.714396   -0.070853    0.321534    11.00000    0.02268    0.01620 =
         0.03112    0.00701   -0.00117    0.00547
AFIX  43
H8    2    0.714755   -0.147507    0.348130    11.00000   -1.20000
AFIX   0
C9    1    0.796308   -0.021488    0.240173    11.00000    0.01740    0.01578 =
         0.02972    0.00328   -0.00002    0.00717
AFIX  43
H9    2    0.864714   -0.057944    0.198238    11.00000   -1.20000
AFIX   0
C10   1    0.816007    0.173173    0.153322    11.00000    0.01421    0.01667 =
         0.01902    0.00246    0.00407    0.00518
AFIX  13
H10   2    0.896639    0.141770    0.115106    11.00000   -1.20000
AFIX   0

N10   4    0.073835    0.219079    0.476574    11.00000    0.03919    0.03501 =
         0.05457    0.01306    0.01551    0.00580
C11   1   -0.005209    0.178636    0.537510    11.00000    0.02596    0.02535 =
         0.03605    0.00521    0.00169    0.00747
C12   1   -0.103389    0.127104    0.617657    11.00000    0.03267    0.04681 =
         0.03893    0.01662    0.01003    0.01427
AFIX 137
H12A  2   -0.123526    0.034570    0.600249    11.00000   -1.50000
H12B  2   -0.195364    0.154096    0.609101    11.00000   -1.50000
H12C  2   -0.057491    0.157893    0.697674    11.00000   -1.50000
AFIX   0

N11   4    0.935798    0.728052    0.084433    11.00000    0.03618    0.04624 =
         0.06407    0.00127    0.00925   -0.00071
C13   1    0.866860    0.629912    0.045905    11.00000    0.02587    0.04093 =
         0.03477    0.01019    0.00811    0.00900
C14   1    0.779422    0.504606   -0.004241    11.00000    0.03356    0.03529 =
         0.03789    0.00851    0.00836    0.00492
AFIX 137
H14A  2    0.829892    0.464838   -0.065559    11.00000   -1.50000
H14B  2    0.683931    0.511171   -0.037515    11.00000   -1.50000
H14C  2    0.765349    0.453124    0.056461    11.00000   -1.50000
AFIX   0
HKLF 4

REM  ppr1a_a.res in P-1
REM R1 =  0.0151 for    6363 Fo > 4sig(Fo)  and  0.0156 for all    6515 data
REM    333 parameters refined using      3 restraints

END

WGHT      0.0133      0.4800

REM Highest difference peak  0.418,  deepest hole -0.549,  1-sigma level  0.067
Q1    1   0.6561 -0.0359  0.3236  11.00000  0.05    0.42
Q2    1   0.8502  0.2415  0.1836  11.00000  0.05    0.37
Q3    1   0.7114  0.1649  0.0032  11.00000  0.05    0.37
Q4    1   0.5418  0.1816 -0.0625  11.00000  0.05    0.36
Q5    1   0.7583  0.1835  0.1067  11.00000  0.05    0.34
;
_shelx_res_checksum                43332
_shelx_hkl_file
;
  -2   0   0 3239.12 74.6370   5
  -2   0   0 3336.11 70.4007   6
   2   0   0 3263.86 69.5075   6
   2   0   0 3242.13 74.9807   5
  -3   0   0 1906.28 49.7978   5
  -3   0   0 1965.99 42.7653   6
   3   0   0 1914.36 42.7840   6
   3   0   0 1830.94 50.2339   5
  -4   0   0 1623.86 38.4051   6
   4   0   0 1690.68 48.7033   5
   4   0   0 1630.88 38.4563   6
  -5   0   0 2318.04 52.7685   6
  -5   0   0 2301.41 64.7193   5
   5   0   0 2232.94 65.5645   5
   5   0   0 2304.29 53.0146   6
  -6   0   0 1029.35 31.6285   4
  -6   0   0 980.393 35.1591   2
   6   0   0 1060.55 31.5876   4
   6   0   0 1068.25 27.1035   1
   6   0   0 1030.81 37.4474   2
  -7   0   0 788.548 27.5338   4
  -7   0   0 777.763 20.6983   3
  -7   0   0 749.748 30.8736   2
   7   0   0 789.127 21.0955   3
   7   0   0 789.477 33.6651   2
   7   0   0 803.547 24.4293   1
   7   0   0 727.630 26.2835   4
  -8   0   0 739.527 20.6499   3
  -8   0   0 763.566 28.4385   4
   8   0   0 811.951 23.0712   3
   8   0   0 745.781 22.9879   1
   8   0   0 726.082 34.7530   2
  -9   0   0 117.701 10.5773   4
  -9   0   0 138.648 6.61683   3
   9   0   0 127.356 17.0983   2
   9   0   0 143.605 6.91384   3
   9   0   0 154.160 8.85929   1
 -10   0   0 538.862 15.9309   3
 -10   0   0 520.957 25.0594   4
  10   0   0 530.778 16.8394   3
  10   0   0 554.744 20.3243   1
  10   0   0 614.243 34.6184   2
 -11   0   0 213.826 16.0840   4
  11   0   0 222.589 12.3185   1
  11   0   0 204.988 20.8086   2
  12   0   0 11.3130 7.93006   2
  12   0   0 19.5925 4.41060   1
  12  -1   0 245.288 13.0923   1
  12  -1   0 275.662 38.2267   2
 -12   1   0 238.575 18.2487   4
  11  -1   0 271.324 13.2416   1
  11  -1   0 267.673 23.4090   2
 -11   1   0 280.902 18.4087   4
  10  -1   0 483.038 18.0575   1
  10  -1   0 480.468 29.9250   2
 -10   1   0 509.896 24.3129   4
   9  -1   0 432.433 16.0678   1
   9  -1   0 482.250 28.0599   2
  -9   1   0 409.142 20.7407   4
  -9   1   0 445.442 13.2952   3
   8  -1   0 427.010 13.1054   3
   8  -1   0 403.273 24.2780   2
   8  -1   0 424.035 14.9324   1
  -8   1   0 443.053 20.2129   4
  -8   1   0 437.324 13.0881   3
   7  -1   0 229.447 8.38659   3
   7  -1   0 237.062 16.8035   2
   7  -1   0 230.662 10.5246   1
   7  -1   0 215.038 12.3292   4
  -7   1   0 228.482 13.0678   4
  -7   1   0 245.674 16.0648   2
  -7   1   0 242.679 8.54016   3
   6  -1   0 81.4834 6.72104   4
   6  -1   0 87.3145 4.48774   3
   6  -1   0 86.0192 5.00234   1
   6  -1   0 102.669 9.88492   2
  -6   1   0 94.3522 4.57144   3
  -6   1   0 97.1783 9.11434   2
  -6   1   0 90.4230 7.32618   4
   5  -1   0 299.826 9.56808   1
   5  -1   0 280.881 12.3237   4
   5  -1   0 280.859 8.86186   3
   5  -1   0 302.919 15.9899   2
  -5   1   0 287.296 8.95108   3
  -5   1   0 311.869 15.5582   2
  -5   1   0 282.965 8.87036   1
   4  -1   0 1597.04 47.0028   5
   4  -1   0 1603.56 36.8564   6
  -4   1   0 1630.90 36.9970   6
  -4   1   0 1551.04 46.2485   5
   3  -1   0 23.3860 1.66123   3
   3  -1   0 23.6020 3.40150   4
   3  -1   0 19.9146 3.74743   2
   3  -1   0 23.6782 1.65578   1
  -3   1   0 22.2518 1.62546   3
  -3   1   0 20.6537 1.46030   1
  -3   1   0 20.6996 2.96820   4
  -3   1   0 32.0016 5.04585   2
   2  -1   0 386.788 10.9600   4
   2  -1   0 372.012 12.6577   2
  -2   1   0 361.416 12.6134   2
   1  -1   0 14.9989 1.02812   3
   1  -1   0 17.1829 1.22915   4
   1  -1   0 16.3653 0.60608   1
   1  -1   0 18.7383 2.34099   2
  -1   1   0 16.7405 0.62744   1
  -1   1   0 15.4882 1.62756   2
  -1   1   0 15.4885 1.20206   4
   0  -1   0 26.7849 1.66981   2
  -1  -1   0 1829.66 42.3636   5
  -1  -1   0 1889.86 40.7201   6
   1   1   0 1784.52 40.5205   6
  -2  -1   0 5215.76 110.920   6
  -2  -1   0 5182.90 115.214   5
   2   1   0 5249.99 111.088   6
  -3  -1   0 1625.55 39.0068   6
  -3  -1   0 1643.33 44.9468   5
   3   1   0 1680.83 46.1839   5
   3   1   0 1697.26 39.2044   6
  -4  -1   0 2090.92 57.8661   5
  -4  -1   0 2193.29 50.1902   6
   4   1   0 2139.01 60.0803   5
   4   1   0 2177.89 50.3941   6
  -5  -1   0 132.730 9.81815   2
  -5  -1   0 128.849 8.12323   4
  -5  -1   0 125.146 5.95705   3
   5   1   0 125.491 10.5196   2
   5   1   0 131.905 8.09910   4
   5   1   0 137.036 6.24203   3
   5   1   0 119.599 6.12770   1
  -6  -1   0 882.142 36.7406   2
  -6  -1   0 969.524 30.1064   4
  -6  -1   0 962.156 26.0972   1
   6   1   0 940.930 36.1255   2
   6   1   0 973.406 30.2162   4
   6   1   0 1006.47 26.2805   1
  -7  -1   0 708.472 25.3058   4
  -7  -1   0 635.083 19.1543   3
   7   1   0 687.017 24.9534   4
   7   1   0 649.154 30.9370   2
   7   1   0 680.012 22.2068   1
   7   1   0 691.164 19.8077   3
  -8  -1   0 1037.51 34.6282   4
  -8  -1   0 1031.56 27.3383   3
   8   1   0 1010.31 27.5683   3
   8   1   0 1012.52 42.7858   2
   8   1   0 1026.85 29.5344   1
  -9  -1   0 753.617 28.9349   4
  -9  -1   0 661.896 19.8470   3
   9   1   0 683.875 22.9048   1
   9   1   0 602.333 41.7904   2
   9   1   0 664.951 20.3861   3
 -10  -1   0 540.552 16.9116   3
 -10  -1   0 549.161 25.6405   4
  10   1   0 509.109 32.4408   2
  10   1   0 544.706 20.6589   1
  10   1   0 559.973 17.6568   3
 -11  -1   0 762.318 32.8202   4
 -11  -1   0 720.682 20.8515   3
  11   1   0 757.631 26.7985   1
  11   1   0 844.284 44.4822   2
 -12  -1   0 321.689 21.0065   4
  12   1   0 269.089 25.9033   2
  12   1   0 307.558 16.0222   1
  12  -2   0 418.069 30.7551   2
  12  -2   0 399.967 16.6910   1
 -12   2   0 414.513 23.9480   4
  11  -2   0 460.015 17.2855   1
  11  -2   0 409.420 29.2574   2
 -11   2   0 410.185 22.9131   4
  10  -2   0 847.052 41.1783   2
  10  -2   0 849.389 25.6861   1
 -10   2   0 873.527 33.8218   4
   9  -2   0 1717.09 59.8668   2
   9  -2   0 1648.84 41.7909   1
  -9   2   0 1689.49 50.9876   4
  -9   2   0 1620.04 38.3286   3
   8  -2   0 1629.92 56.2778   2
   8  -2   0 1684.04 41.1737   1
  -8   2   0 1730.62 49.6128   4
   7  -2   0 1045.15 39.2021   2
   7  -2   0 1036.39 32.6973   4
  -7   2   0 1058.35 38.2985   2
  -7   2   0 1008.49 33.0126   4
  -7   2   0 1052.39 25.5032   3
   6  -2   0 1794.67 53.6959   2
  -6   2   0 1773.23 53.2185   2
   5  -2   0 2631.68 72.6702   5
  -5   2   0 2682.00 59.1884   6
  -5   2   0 2616.69 59.3270   6
  -5   2   0 2604.61 72.0763   5
   4  -2   0 2880.47 74.8248   5
  -4   2   0 2942.27 64.1750   6
  -4   2   0 2976.86 64.6312   6
  -4   2   0 2826.38 74.5574   5
   3  -2   0 986.186 30.6904   5
  -3   2   0 992.938 31.0363   5
  -3   2   0 997.493 24.4593   6
  -3   2   0 1007.66 24.6558   6
   2  -2   0 3815.64 87.5892   5
   2  -2   0 3887.82 83.1880   6
  -2   2   0 3880.62 88.1617   5
  -2   2   0 3874.77 83.1276   6
   1  -2   0 2892.84 63.2308   6
   1  -2   0 2847.41 65.2048   5
  -1   2   0 2932.02 63.3163   6
  -1   2   0 2882.47 64.9536   5
   0  -2   0 3906.31 86.1782   5
   0  -2   0 3901.42 85.3998   6
   0   2   0 3990.22 85.5498   6
   0   2   0 3994.84 86.3984   5
  -1  -2   0 4096.56 91.6657   5
  -1  -2   0 4183.24 90.0532   6
   1   2   0 4131.90 92.0836   5
  -2  -2   0 4443.88 101.277   5
  -2  -2   0 4614.50 98.1926   6
   2   2   0 4528.71 98.1747   6
   2   2   0 4349.74 102.069   5
  -3  -2   0 1635.34 39.9223   6
  -3  -2   0 1562.45 44.2263   5
   3   2   0 1643.58 40.1238   6
  -4  -2   0 1023.87 31.4474   2
   4   2   0 1000.91 28.1326   4
   4   2   0 1015.26 27.6150   3
   4   2   0 998.389 33.0620   2
  -5  -2   0 954.747 32.9628   2
  -5  -2   0 1038.71 29.9370   4
   5   2   0 1045.12 27.0556   3
   5   2   0 1023.39 29.9665   4
   5   2   0 1006.17 35.5440   2
  -6  -2   0 237.487 9.88360   3
  -6  -2   0 225.663 10.1425   1
  -6  -2   0 259.460 12.8471   4
   6   2   0 247.352 16.8288   2
   6   2   0 240.110 10.2859   1
   6   2   0 229.370 9.97454   3
  -7  -2   0 140.142 7.56270   3
  -7  -2   0 139.324 10.0754   4
   7   2   0 154.850 14.2363   2
   7   2   0 141.416 7.75047   3
   7   2   0 130.816 12.2172   4
   7   2   0 149.418 9.35738   1
  -8  -2   0 11.0106 3.72557   4
  -8  -2   0 13.6888 3.00336   3
   8   2   0 14.7492 3.34449   3
   8   2   0 15.4481 3.16908   1
   8   2   0 24.2979 8.18128   2
  -9  -2   0 78.7652 5.76193   3
   9   2   0 74.2729 14.4918   2
   9   2   0 85.3750 7.21818   1
   9   2   0 81.2098 6.12656   3
 -10  -2   0 2.23893 1.88159   3
 -10  -2   0 2.92861 2.55316   4
  10   2   0 0.02490 1.68800   1
  10   2   0 2.05759 1.36764   3
  10   2   0 -0.3366 1.41410   2
 -11  -2   0 40.7848 5.58380   3
 -11  -2   0 39.5816 8.78847   4
  11   2   0 36.6979 10.1320   2
  11   2   0 38.6602 6.19280   1
 -12  -2   0 26.5421 7.03778   4
  12   2   0 24.2278 5.54784   1
  12   2   0 12.5150 6.46271   2
  13  -3   0 232.741 11.9531   1
  13  -3   0 264.775 25.1247   2
 -13   3   0 223.537 18.2295   4
  12  -3   0 252.751 23.6599   2
  12  -3   0 301.406 13.2527   1
 -12   3   0 272.779 19.2433   4
  11  -3   0 214.269 20.3630   2
  11  -3   0 210.963 10.3522   1
 -11   3   0 197.666 15.4984   4
  10  -3   0 25.8673 8.55475   2
  10  -3   0 14.0771 3.17153   1
 -10   3   0 15.0143 5.29251   4
   9  -3   0 34.1369 4.19141   1
   9  -3   0 44.0022 10.0816   2
  -9   3   0 39.6701 3.08902   3
  -9   3   0 34.2728 2.97471   3
  -9   3   0 38.3185 7.47619   4
   8  -3   0 108.857 5.89071   1
   8  -3   0 86.5545 11.3823   2
  -8   3   0 127.885 10.0699   4
  -8   3   0 106.809 5.21681   3
  -8   3   0 101.975 5.26065   3
   7  -3   0 116.387 11.3055   2
   7  -3   0 108.604 6.64476   1
  -7   3   0 115.296 5.61204   3
  -7   3   0 132.174 9.19637   4
  -7   3   0 116.733 5.50572   3
  -7   3   0 104.706 10.6670   2
  -7   3   0 126.010 9.29837   4
   6  -3   0 6.47025 2.06239   4
   6  -3   0 11.2883 4.33809   2
   6  -3   0 7.21103 1.51085   1
  -6   3   0 9.09789 1.90466   3
  -6   3   0 14.8588 3.84794   4
  -6   3   0 5.33186 2.05106   4
  -6   3   0 15.0596 2.47608   3
  -6   3   0 6.83878 2.66080   2
   5  -3   0 32.1473 4.34072   4
   5  -3   0 32.5308 2.19940   1
   5  -3   0 34.5553 5.90936   2
  -5   3   0 50.9475 8.42836   2
  -5   3   0 42.7389 5.79739   4
  -5   3   0 34.6026 2.72754   3
  -5   3   0 34.6607 2.90459   3
  -5   3   0 39.3472 4.90782   4
  -5   3   0 35.7292 2.05721   1
  -4   3   0 678.131 23.6852   2
  -4   3   0 614.818 14.2429   1
  -4   3   0 629.441 16.8382   3
  -4   3   0 570.201 18.4533   4
  -4   3   0 615.116 19.2185   4
   3  -3   0 8.12666 0.66823   1
   3  -3   0 12.7779 3.25128   2
   3  -3   0 8.90552 1.65272   3
  -3   3   0 7.94533 1.80296   4
  -3   3   0 7.95316 1.78553   4
  -3   3   0 8.06026 0.65131   1
  -3   3   0 11.6366 1.95438   3
  -3   3   0 11.7175 3.24377   2
   2  -3   0 13.9021 2.17978   3
  -2   3   0 13.0425 0.73859   1
  -2   3   0 16.1260 2.91471   2
  -2   3   0 12.6603 1.76998   4
  -2   3   0 14.8906 0.67209   1
  -2   3   0 11.0883 1.80705   3
  -2   3   0 9.88914 2.55556   2
  -2   3   0 13.7017 2.00153   4
   1  -3   0 278.208 7.52115   4
   1  -3   0 282.192 9.29417   3
   1  -3   0 267.995 10.3889   2
  -1   3   0 283.239 6.86297   1
  -1   3   0 281.851 10.4424   2
  -1   3   0 286.385 9.34366   3
   0  -3   0 108.884 5.99120   2
   0  -3   0 116.052 5.46919   3
   0  -3   0 126.109 4.87265   4
   0   3   0 113.124 5.45374   3
   0   3   0 114.567 3.67840   4
   0   3   0 120.326 4.04405   1
   0   3   0 124.888 6.42639   2
  -1  -3   0 1854.55 45.7934   5
  -1  -3   0 1751.14 43.6573   6
   1   3   0 1761.71 45.8762   5
   1   3   0 1810.59 43.9370   6
  -2  -3   0 2409.66 59.9269   5
  -2  -3   0 2403.68 56.8964   6
   2   3   0 2338.72 60.7350   5
  -3  -3   0 2196.33 58.5619   5
  -3  -3   0 2218.10 54.2312   6
   3   3   0 2277.44 54.6543   6
   3   3   0 2142.05 60.0854   5
  -4  -3   0 775.175 27.0038   2
  -4  -3   0 843.736 24.1354   4
  -4  -3   0 807.125 23.0457   3
   4   3   0 824.600 23.4408   3
   4   3   0 817.163 29.6985   2
   4   3   0 827.378 22.2659   1
   4   3   0 816.168 24.2336   4
  -5  -3   0 1019.07 26.9112   3
  -5  -3   0 946.213 32.4027   2
   5   3   0 904.974 28.3226   4
   5   3   0 949.158 26.7380   3
   5   3   0 920.228 34.7460   2
  -6  -3   0 2243.94 62.6632   2
  -6  -3   0 2161.12 53.4850   1
   6   3   0 2282.96 67.2019   2
   6   3   0 2177.61 57.1660   4
  -7  -3   0 1640.53 42.3689   3
  -7  -3   0 1687.32 47.2238   4
   7   3   0 1680.92 43.1817   3
   7   3   0 1595.26 56.8880   2
  -8  -3   0 764.629 23.9129   3
  -8  -3   0 775.832 28.9678   4
   8   3   0 745.609 37.2273   2
   8   3   0 816.162 25.6847   1
   8   3   0 774.165 24.5830   3
  -9  -3   0 486.468 22.8158   4
  -9  -3   0 472.468 17.4695   3
   9   3   0 493.494 31.2730   2
   9   3   0 481.462 19.4152   1
   9   3   0 490.138 18.2393   3
 -10  -3   0 164.724 9.14849   3
 -10  -3   0 176.508 13.7240   4
  10   3   0 169.825 24.7657   2
  10   3   0 135.704 10.1720   1
  10   3   0 168.472 12.4136   3
 -11  -3   0 434.218 23.5686   4
 -11  -3   0 443.809 16.6031   3
  11   3   0 456.136 20.4090   1
  11   3   0 402.095 35.4400   2
  13  -4   0 393.887 30.5971   2
  13  -4   0 419.348 15.6575   1
 -13   4   0 406.197 24.8982   4
  12  -4   0 414.238 29.9922   2
  12  -4   0 421.626 15.4531   1
 -12   4   0 481.711 25.7893   4
  11  -4   0 449.173 29.5520   2
  11  -4   0 409.845 14.6172   1
 -11   4   0 437.020 23.4861   4
  10  -4   0 949.967 43.0916   2
  10  -4   0 957.805 26.0804   1
 -10   4   0 1015.49 37.2341   4
   9  -4   0 2155.22 70.0776   2
  -9   4   0 2231.15 62.5919   4
   8  -4   0 1278.17 46.5068   2
   8  -4   0 1273.16 30.6045   1
  -8   4   0 1292.67 31.6212   3
  -8   4   0 1220.40 33.3884   3
  -8   4   0 1275.86 40.1482   4
   7  -4   0 833.443 33.7465   2
   7  -4   0 804.032 20.6280   1
  -7   4   0 838.840 27.7996   4
  -7   4   0 875.168 22.8792   3
  -7   4   0 876.876 29.0111   4
  -7   4   0 840.878 23.6663   3
  -7   4   0 805.212 33.9685   2
   6  -4   0 382.287 10.4314   1
   6  -4   0 392.512 19.9039   2
  -6   4   0 386.513 20.3477   2
  -6   4   0 398.647 12.9664   3
  -6   4   0 382.392 16.4058   4
  -6   4   0 399.517 15.9636   4
  -6   4   0 388.641 12.5945   3
  -5   4   0 1826.20 45.4157   4
  -5   4   0 1758.44 52.0799   2
   4  -4   0 2519.07 68.1549   5
   4  -4   0 2534.10 60.2332   6
  -4   4   0 2615.93 60.5595   6
  -4   4   0 2621.95 70.3596   5
   3  -4   0 4411.54 99.9282   6
  -3   4   0 4433.95 105.637   5
  -3   4   0 4532.30 107.232   5
  -3   4   0 4571.88 100.102   6
   2  -4   0 5679.31 124.194   6
  -2   4   0 5582.87 126.690   6
  -2   4   0 5730.70 127.750   5
   1  -4   0 499.080 15.5961   3
   1  -4   0 507.799 17.2054   2
  -1   4   0 544.221 16.8900   3
  -1   4   0 520.163 17.1486   2
   0  -4   0 357.940 9.56916   1
   0  -4   0 347.966 13.4141   2
   0   4   0 360.369 9.26646   4
   0   4   0 361.720 9.84900   1
   0   4   0 362.171 13.6864   2
   0   4   0 369.462 12.5398   3
  -1  -4   0 970.070 28.1480   2
   2   4   0 1147.78 30.4885   3
  -3  -4   0 406.145 14.2008   3
  -3  -4   0 381.698 12.9710   4
  -3  -4   0 383.457 16.4138   2
  -3  -4   0 383.305 11.9163   1
   3   4   0 368.364 17.4172   2
   3   4   0 382.305 13.3778   4
   3   4   0 376.171 14.1900   3
  -4  -4   0 8.10153 2.46955   4
  -4  -4   0 2.72319 1.43997   3
  -4  -4   0 3.03773 1.27101   1
  -4  -4   0 3.21059 2.04176   2
   4   4   0 2.43284 1.29591   1
   4   4   0 2.02338 1.22800   3
   4   4   0 3.89349 1.67307   4
   4   4   0 2.78156 1.93742   2
  -5  -4   0 16.0772 3.26241   3
  -5  -4   0 18.7985 4.72218   2
  -5  -4   0 14.1312 3.26497   4
   5   4   0 14.2995 3.35738   4
   5   4   0 19.6398 3.70108   1
   5   4   0 11.5504 3.87846   2
   5   4   0 14.1881 3.18567   3
  -6  -4   0 52.6252 5.12398   3
  -6  -4   0 62.2005 8.08372   4
   6   4   0 54.6858 6.74108   3
   6   4   0 51.1656 6.01378   1
   6   4   0 39.6225 5.78327   4
   6   4   0 46.2513 8.39388   2
  -7  -4   0 26.1159 5.05441   3
  -7  -4   0 31.3589 6.09310   4
   7   4   0 44.2618 10.8563   2
   7   4   0 26.3777 5.10537   3
  -8  -4   0 113.972 9.87433   4
  -8  -4   0 119.140 8.17997   3
   8   4   0 131.534 8.95821   1
   8   4   0 123.700 8.70696   3
   8   4   0 122.785 18.9802   2
  -9  -4   0 111.937 8.09887   3
  -9  -4   0 116.797 10.4776   4
   9   4   0 103.384 8.54251   1
   9   4   0 102.314 18.4352   2
   9   4   0 112.200 8.29407   3
 -10  -4   0 99.8711 7.67647   3
 -10  -4   0 101.410 12.4449   4
  10   4   0 84.6250 15.3937   2
  10   4   0 96.9673 8.01165   3
  10   4   0 93.9895 8.57360   1
 -11  -4   0 91.7536 12.1765   4
 -11  -4   0 99.0835 7.58308   3
  11   4   0 103.857 9.46523   1
  11   4   0 81.6020 16.2774   2
  12  -5   0 40.8843 4.56036   1
  12  -5   0 35.1859 9.49664   2
 -12   5   0 32.7770 7.91426   4
  11  -5   0 83.2792 5.16442   1
  11  -5   0 68.7080 12.7411   2
 -11   5   0 93.0210 13.2118   4
  10  -5   0 11.3069 2.18351   1
  10  -5   0 10.5373 5.85330   2
 -10   5   0 15.2682 5.17900   4
 -10   5   0 5.83972 1.64248   3
   9  -5   0 63.3360 11.2055   2
   9  -5   0 67.8685 4.01422   1
  -9   5   0 69.0450 4.85555   3
  -9   5   0 67.6151 9.44003   4
  -9   5   0 68.5516 4.61217   3
   8  -5   0 230.899 7.64791   1
   8  -5   0 214.433 16.8048   2
  -8   5   0 255.393 9.97275   3
  -8   5   0 249.790 10.1531   3
  -8   5   0 213.733 13.6070   4
   7  -5   0 437.073 22.8217   2
   7  -5   0 405.674 10.7333   1
  -7   5   0 415.619 23.1776   2
  -7   5   0 420.699 18.4298   4
  -7   5   0 414.295 14.4447   3
  -7   5   0 414.837 14.0165   3
  -7   5   0 415.376 17.4764   4
   6  -5   0 295.878 16.9842   2
   6  -5   0 272.688 7.13111   1
  -6   5   0 274.012 10.7573   3
  -6   5   0 276.961 12.8127   4
  -6   5   0 266.461 19.4006   2
  -6   5   0 285.708 11.3498   3
  -6   5   0 281.812 13.6257   4
   5  -5   0 1352.35 42.8593   2
  -5   5   0 1424.95 44.8775   2
  -5   5   0 1458.18 37.3528   4
   4  -5   0 398.935 13.7010   3
  -4   5   0 415.789 13.7984   4
  -4   5   0 413.067 18.0444   2
  -4   5   0 417.024 13.9231   3
  -4   5   0 381.625 18.3519   2
  -4   5   0 408.098 14.4347   4
  -3   5   0 1307.71 38.7577   2
   2  -5   0 887.113 27.5031   2
  -2   5   0 848.483 26.5569   2
  -2   5   0 867.300 24.3196   3
   1  -5   0 3075.19 73.1335   6
   1  -5   0 3075.59 75.8968   5
  -1   5   0 3028.84 74.8891   5
  -1   5   0 3038.46 73.2744   6
   0  -5   0 2303.14 57.1947   6
   0  -5   0 2270.95 58.7947   5
   0   5   0 2272.68 58.9755   5
   0   5   0 2193.13 56.7786   6
  -1  -5   0 314.578 9.34467   4
  -1  -5   0 326.982 14.2709   2
  -1  -5   0 324.033 9.82793   1
  -1  -5   0 315.249 12.6661   3
   1   5   0 334.048 9.84214   4
   1   5   0 327.302 10.3354   1
   1   5   0 311.366 12.6938   3
   1   5   0 319.540 14.4930   2
  -2  -5   0 1509.71 41.6003   2
   2   5   0 1453.09 38.8657   3
  -3  -5   0 1285.51 39.5381   2
   3   5   0 1409.71 37.2121   3
  -4  -5   0 1136.51 29.6959   1
  -4  -5   0 1178.75 31.7352   4
  -4  -5   0 1196.53 33.3127   3
   4   5   0 1168.86 32.4043   4
   4   5   0 1162.46 33.6748   3
   4   5   0 1188.28 40.6050   2
  -5  -5   0 928.669 33.5518   2
  -5  -5   0 940.685 28.6597   3
  -5  -5   0 968.133 28.4370   4
   5   5   0 927.058 37.0401   2
   5   5   0 892.597 28.5710   4
   5   5   0 962.800 27.3439   1
   5   5   0 951.412 29.2358   3
  -6  -5   0 357.217 15.1346   3
  -6  -5   0 327.884 15.0987   4
   6   5   0 304.697 15.1119   4
   6   5   0 349.239 14.3864   1
   6   5   0 327.402 14.9299   3
   6   5   0 314.491 21.2561   2
  -7  -5   0 487.062 20.6973   4
  -7  -5   0 516.990 19.8123   3
   7   5   0 523.088 19.7499   1
   7   5   0 527.173 20.5455   3
   7   5   0 535.884 29.9849   2
  -8  -5   0 767.044 28.4094   4
  -8  -5   0 756.615 25.8900   3
   8   5   0 728.329 38.8837   2
   8   5   0 749.738 26.0415   1
  -9  -5   0 386.085 17.1559   3
  -9  -5   0 421.925 20.6804   4
   9   5   0 391.611 18.1776   1
   9   5   0 384.190 28.5220   2
 -10  -5   0 88.4461 11.1166   4
 -10  -5   0 89.1926 7.76700   3
  10   5   0 89.3672 10.6494   1
  10   5   0 76.7352 15.5313   2
  12  -6   0 545.234 15.5624   1
  12  -6   0 621.079 38.0447   2
 -12   6   0 589.627 29.3706   4
  11  -6   0 911.625 44.2300   2
  11  -6   0 980.422 23.7196   1
 -11   6   0 990.270 38.4491   4
  10  -6   0 417.550 11.5547   1
  10  -6   0 419.633 26.7934   2
 -10   6   0 444.559 22.5919   4
 -10   6   0 417.243 14.2640   3
 -10   6   0 402.774 13.7964   3
   9  -6   0 790.535 36.9752   2
   9  -6   0 832.066 19.2350   1
  -9   6   0 797.899 23.3262   3
  -9   6   0 840.867 24.1106   3
  -9   6   0 783.431 30.6611   4
   8  -6   0 724.067 32.7862   2
  -8   6   0 734.222 27.6933   4
  -8   6   0 734.507 22.5186   3
  -8   6   0 729.078 21.9933   3
   7  -6   0 643.961 28.8908   2
  -7   6   0 645.891 22.9986   4
  -7   6   0 645.100 20.3026   3
  -7   6   0 655.961 20.9956   3
  -7   6   0 651.972 24.4041   4
  -6   6   0 1260.55 35.6674   4
  -6   6   0 1267.68 44.6647   2
  -6   6   0 1286.63 35.0915   3
  -6   6   0 1318.93 37.5916   4
  -6   6   0 1320.96 43.3977   2
  -6   6   0 1309.20 34.4467   3
   5  -6   0 718.585 22.1684   3
  -5   6   0 731.260 23.4586   4
  -5   6   0 748.555 22.4890   3
  -5   6   0 740.816 30.1085   2
  -5   6   0 747.828 22.3841   4
   4  -6   0 73.9393 5.60705   3
  -4   6   0 75.9427 5.66652   3
  -4   6   0 90.3255 11.5366   2
  -4   6   0 71.9493 5.32606   4
  -4   6   0 53.7272 7.62984   2
  -4   6   0 76.6211 4.91511   4
   3  -6   0 527.601 18.0672   3
  -3   6   0 547.954 21.0650   2
  -3   6   0 514.376 21.6796   2
  -3   6   0 534.128 12.6398   1
  -3   6   0 585.849 16.6288   4
  -3   6   0 542.995 18.1775   3
  -3   6   0 525.293 12.5174   1
  -3   6   0 540.781 15.2242   4
   2  -6   0 5.53381 1.81985   3
   2  -6   0 6.08767 2.72912   2
  -2   6   0 9.04676 1.35274   1
  -2   6   0 8.11104 1.48684   4
  -2   6   0 6.46666 2.67043   2
  -2   6   0 5.26278 1.87934   3
   1  -6   0 377.996 10.3618   4
   1  -6   0 400.256 10.5153   1
   1  -6   0 375.513 14.6641   3
   1  -6   0 394.656 16.6793   2
  -1   6   0 383.609 10.8817   1
  -1   6   0 382.085 14.8553   3
  -1   6   0 395.971 10.5166   4
  -1   6   0 378.109 16.3353   2
   0  -6   0 193.304 5.95896   4
   0  -6   0 176.070 9.50077   3
   0  -6   0 181.391 6.49719   1
   0  -6   0 179.726 10.5869   2
   0   6   0 203.970 11.3348   2
   0   6   0 181.895 9.65018   3
   0   6   0 177.670 6.03279   4
   0   6   0 190.286 7.10316   1
  -1  -6   0 227.993 7.36256   4
  -1  -6   0 207.935 11.9039   2
  -1  -6   0 232.302 11.1616   3
  -1  -6   0 214.420 7.79067   1
   1   6   0 210.923 8.28989   1
   1   6   0 212.313 7.56801   4
   1   6   0 211.782 10.8403   3
   1   6   0 220.213 12.4875   2
  -2  -6   0 15.9670 2.70989   1
  -2  -6   0 20.6398 2.73309   4
  -2  -6   0 18.9553 3.96351   3
  -2  -6   0 16.1971 3.99081   2
   2   6   0 20.2033 4.21206   3
   2   6   0 16.0440 2.64867   4
   2   6   0 14.7982 5.35898   2
   2   6   0 13.5204 2.45405   1
  -3  -6   0 321.300 14.4690   3
  -3  -6   0 323.315 16.6111   2
  -3  -6   0 331.559 11.8584   4
  -3  -6   0 332.708 11.5463   1
   3   6   0 355.175 12.8942   4
   3   6   0 320.846 17.9503   2
   3   6   0 340.159 12.6470   1
   3   6   0 338.477 15.0114   3
  -4  -6   0 8.49873 3.43352   2
  -4  -6   0 8.15047 3.00448   3
  -4  -6   0 10.4820 2.41234   1
  -4  -6   0 11.9587 2.90383   4
   4   6   0 6.21698 3.56317   2
   4   6   0 8.28984 2.56580   4
   4   6   0 5.81232 1.92244   1
   4   6   0 6.13953 2.62900   3
  -5  -6   0 9.47725 3.04856   4
  -5  -6   0 8.78461 2.89884   3
   5   6   0 7.90206 2.62616   4
   5   6   0 6.17294 3.51835   2
   5   6   0 15.7574 3.68666   1
   5   6   0 5.02519 2.56468   3
  -6  -6   0 818.235 26.6085   4
  -6  -6   0 792.935 27.0023   3
   6   6   0 757.504 36.0368   2
   6   6   0 767.767 27.1835   4
   6   6   0 805.749 25.7919   1
  -7  -6   0 159.460 10.6818   4
  -7  -6   0 152.055 10.3323   3
   7   6   0 144.794 9.76919   1
   7   6   0 145.088 19.0321   2
  -8  -6   0 394.061 18.8857   4
  -8  -6   0 417.668 18.3049   3
   8   6   0 372.338 17.4175   1
   8   6   0 360.411 26.9575   2
  -9  -6   0 391.168 20.2036   4
  -9  -6   0 416.004 18.6871   3
   9   6   0 404.528 19.0373   1
 -10  -6   0 439.699 22.7407   3
 -10  -6   0 496.572 23.7903   4
  10   6   0 504.344 23.0630   1
  10   6   0 406.862 32.5098   2
  12  -7   0 84.3437 19.2650   2
 -12   7   0 158.672 14.5758   4
  11  -7   0 199.696 19.0571   2
 -11   7   0 177.699 8.43879   3
 -11   7   0 181.348 14.8627   4
  10  -7   0 301.567 22.4699   2
 -10   7   0 310.290 12.3832   3
 -10   7   0 307.475 12.7300   3
 -10   7   0 292.803 18.1991   4
   9  -7   0 505.479 28.1580   2
  -9   7   0 475.368 17.1077   3
  -9   7   0 498.213 22.9630   4
  -9   7   0 505.929 18.5956   3
  -8   7   0 392.795 23.3270   2
  -8   7   0 412.511 19.2944   4
  -8   7   0 381.191 15.0682   3
  -7   7   0 1095.11 32.9726   4
  -7   7   0 1087.37 31.1790   3
  -7   7   0 1103.56 40.9275   2
  -7   7   0 1115.93 35.0460   4
  -6   7   0 1544.02 48.6433   2
  -6   7   0 1490.10 39.7311   4
  -6   7   0 1446.91 50.3222   2
  -6   7   0 1448.35 39.5209   3
  -6   7   0 1529.10 41.9827   4
  -5   7   0 942.188 28.0747   4
  -5   7   0 958.932 33.9712   2
  -5   7   0 931.626 35.6410   2
  -5   7   0 936.086 26.3193   4
  -5   7   0 927.021 28.0167   3
   4  -7   0 739.853 26.0557   3
  -4   7   0 777.724 22.4645   4
  -4   7   0 755.467 27.8900   2
  -4   7   0 759.620 29.9210   2
  -4   7   0 745.364 20.7554   4
  -4   7   0 701.304 23.4012   3
  -3   7   0 1948.09 55.6377   2
  -3   7   0 1974.98 50.1750   3
   2  -7   0 2047.45 56.0348   2
  -2   7   0 2003.14 52.0580   3
  -2   7   0 2093.76 55.4638   2
   1  -7   0 2333.55 63.3037   6
   1  -7   0 2398.30 66.9617   5
  -1   7   0 2426.06 64.1354   6
  -1   7   0 2473.37 66.5228   5
   0  -7   0 606.476 23.9970   2
   0  -7   0 664.843 17.2982   1
   0  -7   0 674.946 22.7594   3
   0  -7   0 671.755 16.0292   4
   0   7   0 652.916 16.4561   4
   0   7   0 645.550 22.6316   3
   0   7   0 670.481 18.2039   1
  -1  -7   0 1282.26 38.8425   2
  -1  -7   0 1225.36 35.8773   3
  -1  -7   0 1221.90 30.0581   1
   1   7   0 1290.60 39.6261   2
   1   7   0 1211.45 36.2961   3
   1   7   0 1228.96 29.5843   4
   1   7   0 1235.21 31.3004   1
  -2  -7   0 1418.06 40.3893   3
  -2  -7   0 1447.84 35.1240   1
  -2  -7   0 1460.60 47.7172   2
   2   7   0 1505.66 45.9496   2
   2   7   0 1372.06 40.6367   3
   2   7   0 1455.22 35.4751   4
   2   7   0 1462.92 36.6321   1
  -3  -7   0 1389.07 33.7783   4
  -3  -7   0 1333.67 33.7201   1
  -3  -7   0 1348.49 38.9627   3
  -3  -7   0 1280.16 42.2837   2
   3   7   0 1356.39 35.3128   1
   3   7   0 1282.62 39.1100   3
   3   7   0 1385.57 45.3460   2
   3   7   0 1312.52 34.6108   4
  -4  -7   0 843.732 24.0826   4
  -4  -7   0 808.296 27.7193   3
  -4  -7   0 779.938 23.1366   1
   4   7   0 820.637 25.1248   1
   4   7   0 841.627 25.2938   4
   4   7   0 799.390 33.9334   2
  -5  -7   0 436.903 16.6468   4
  -5  -7   0 437.732 18.9686   3
  -5  -7   0 459.592 18.6755   1
   5   7   0 444.917 17.3024   1
   5   7   0 427.311 25.0280   2
   5   7   0 423.508 17.3785   4
  -6  -7   0 130.391 9.79343   3
  -6  -7   0 126.559 8.83313   4
   6   7   0 111.434 8.78616   4
   6   7   0 152.756 20.4075   2
   6   7   0 131.907 9.08665   1
  -7  -7   0 266.774 14.2906   4
  -7  -7   0 257.279 14.6479   3
   7   7   0 233.636 20.6615   2
   7   7   0 271.537 14.1434   1
  -8  -7   0 219.352 14.2247   3
   8   7   0 231.656 13.6977   1
   8   7   0 248.259 22.4575   2
  -9  -7   0 143.841 11.7114   4
  -9  -7   0 142.655 11.0347   3
   9   7   0 145.573 11.2513   1
   9   7   0 154.277 24.1229   2
 -12   8   0 179.444 23.8943   4
 -12   8   0 142.847 19.1182   2
 -11   8   0 374.425 26.9255   2
 -11   8   0 377.789 21.9754   4
 -10   8   0 110.954 7.49499   3
 -10   8   0 95.2348 13.5376   2
 -10   8   0 128.108 14.8043   4
 -10   8   0 114.143 7.88906   3
  -9   8   0 7.86725 3.35442   4
  -9   8   0 10.7314 3.24631   3
  -9   8   0 1.14429 2.72213   2
  -9   8   0 8.52295 2.74683   3
  -8   8   0 6.84171 4.20259   2
  -8   8   0 3.97322 2.36128   4
  -8   8   0 4.03877 2.15096   3
  -8   8   0 4.79601 2.26834   3
  -7   8   0 413.595 18.3626   4
  -7   8   0 408.158 17.3757   3
  -7   8   0 390.412 16.3433   4
  -7   8   0 395.365 22.5899   2
   6  -8   0 104.939 7.83090   3
  -6   8   0 96.3269 7.77076   4
  -6   8   0 104.013 7.04142   4
  -6   8   0 99.3543 10.3137   2
   5  -8   0 20.8388 4.23246   3
  -5   8   0 25.3770 6.84248   2
  -5   8   0 22.9900 4.25547   4
  -5   8   0 24.8206 6.36392   2
  -5   8   0 19.3144 3.30293   4
   4  -8   0 131.944 8.76041   3
  -4   8   0 124.686 10.3817   2
  -4   8   0 118.738 4.03992   1
  -4   8   0 120.780 8.55376   3
  -4   8   0 125.498 6.32595   4
  -4   8   0 112.989 10.7906   2
  -4   8   0 114.677 6.95155   4
   3  -8   0 85.4191 7.05159   3
   3  -8   0 69.6929 9.71876   2
  -3   8   0 75.0362 9.80983   2
  -3   8   0 68.2649 4.11656   4
  -3   8   0 71.7890 4.68159   4
  -3   8   0 67.8874 3.38161   1
  -3   8   0 74.4492 6.68103   3
  -3   8   0 47.9972 7.74292   2
   2  -8   0 54.3788 9.10095   2
   2  -8   0 40.5243 5.50739   3
  -2   8   0 51.6003 3.36826   4
  -2   8   0 37.9540 5.38223   3
  -2   8   0 49.4598 3.06783   4
  -2   8   0 52.1399 7.48471   2
  -2   8   0 50.7452 3.23352   1
   1  -8   0 32.5192 2.21495   4
   1  -8   0 23.3462 4.99456   2
   1  -8   0 34.7286 2.61707   1
   1  -8   0 25.0967 4.53721   3
  -1   8   0 21.8662 4.73982   2
  -1   8   0 33.0073 2.89202   1
  -1   8   0 33.9342 2.27312   4
  -1   8   0 33.3620 5.92982   3
   0  -8   0 264.794 9.24478   1
   0  -8   0 281.803 7.95767   4
   0  -8   0 258.607 13.5639   3
   0  -8   0 265.234 15.2333   2
   0   8   0 277.288 10.2410   1
   0   8   0 266.496 8.26044   4
   0   8   0 270.277 13.9257   3
   0   8   0 288.372 15.8540   2
  -1  -8   0 1600.84 48.6147   2
   1   8   0 1674.30 49.7689   3
   1   8   0 1623.55 38.0949   4
   1   8   0 1715.31 50.4755   2
   1   8   0 1654.49 40.7384   1
  -2  -8   0 2278.55 63.4918   2
  -3  -8   0 1720.94 48.1494   3
  -3  -8   0 1662.03 40.4313   4
   3   8   0 1625.42 41.7801   4
   3   8   0 1714.92 45.8348   1
   3   8   0 1650.15 53.8650   2
  -4  -8   0 663.229 25.2478   3
  -4  -8   0 603.719 19.6300   1
  -4  -8   0 641.590 20.0309   4
   4   8   0 637.918 30.6551   2
   4   8   0 629.941 21.6206   1
   4   8   0 651.420 21.2806   4
  -5  -8   0 929.673 29.6170   1
  -5  -8   0 1021.19 29.4390   4
  -5  -8   0 1005.48 33.8636   3
   5   8   0 1013.97 30.9258   1
   5   8   0 1014.62 42.6128   2
  -6  -8   0 693.466 23.4250   4
  -6  -8   0 657.536 26.1594   3
   6   8   0 665.679 24.2929   1
   6   8   0 634.398 34.6741   2
  -7  -8   0 367.855 16.7744   4
  -7  -8   0 360.272 18.3661   3
   7   8   0 325.481 25.3870   2
   7   8   0 353.014 17.1134   1
  -8  -8   0 245.883 15.0993   3
  -8  -8   0 228.572 13.7497   4
   8   8   0 223.573 13.8707   1
   8   8   0 207.320 21.2304   2
  -9  -8   0 485.383 22.2751   3
  -9  -8   0 474.661 21.9485   4
   9   8   0 482.368 34.8915   2
   9   8   0 434.764 21.4578   1
 -12   9   0 196.744 20.2508   2
 -12   9   0 187.103 22.6443   4
 -11   9   0 304.374 19.3364   4
 -11   9   0 272.487 13.1902   3
 -11   9   0 251.745 22.0722   2
 -10   9   0 338.739 15.6825   3
 -10   9   0 326.535 14.8542   3
 -10   9   0 319.787 23.7022   2
 -10   9   0 334.226 19.4617   4
  -9   9   0 643.339 33.0199   2
  -9   9   0 634.005 23.4736   3
  -9   9   0 582.655 22.2043   3
  -9   9   0 625.741 26.4872   4
  -8   9   0 470.855 21.0413   4
  -8   9   0 436.177 28.5575   2
  -8   9   0 465.673 19.7964   3
  -8   9   0 447.751 18.7901   3
  -7   9   0 547.976 21.9230   4
  -7   9   0 549.445 27.7899   2
  -7   9   0 559.355 22.2427   3
  -7   9   0 538.773 21.1444   3
  -7   9   0 548.685 20.0553   4
   6  -9   0 742.647 26.0528   3
  -6   9   0 751.323 25.5745   4
  -6   9   0 737.295 26.2302   3
  -6   9   0 779.778 32.3476   2
  -6   9   0 790.698 23.8303   4
   5  -9   0 1176.66 36.2085   3
  -5   9   0 1243.11 31.8451   4
  -5   9   0 1160.36 36.4943   3
  -5   9   0 1254.56 34.3049   4
  -5   9   0 1190.85 41.6789   2
   4  -9   0 1341.81 39.3916   3
  -4   9   0 1347.26 43.6368   2
  -4   9   0 1338.80 30.0543   1
  -4   9   0 1333.58 32.8910   4
  -4   9   0 1258.35 45.6298   2
  -4   9   0 1381.85 35.1588   4
  -4   9   0 1354.69 42.8459   3
   3  -9   0 1406.35 46.2395   2
   3  -9   0 1452.07 41.5578   3
  -3   9   0 1378.55 33.5628   4
  -3   9   0 1447.05 45.2934   2
  -3   9   0 1451.73 34.9933   4
  -3   9   0 1388.32 32.7855   1
   2  -9   0 987.783 36.6743   2
  -2   9   0 1104.11 26.0653   4
  -2   9   0 1041.85 36.3621   2
  -2   9   0 1070.04 25.3541   4
  -2   9   0 1088.01 26.5582   1
   1  -9   0 808.907 28.0296   3
   1  -9   0 775.199 30.4005   2
   1  -9   0 799.377 20.6313   1
  -1   9   0 811.506 19.2133   4
  -1   9   0 818.608 22.0108   1
  -1   9   0 827.106 30.9438   2
   0  -9   0 885.731 20.4102   4
   0  -9   0 890.208 30.2970   3
   0  -9   0 911.387 23.2408   1
   0  -9   0 863.553 32.6528   2
   0   9   0 851.040 20.8060   4
   0   9   0 902.314 24.6285   1
   0   9   0 887.129 33.2060   2
  -1  -9   0 98.1616 8.80267   3
  -1  -9   0 94.2338 4.17411   4
   1   9   0 97.1270 10.0084   2
   1   9   0 81.8104 5.79181   1
   1   9   0 88.8235 4.56200   4
  -2  -9   0 176.613 12.1257   3
  -2  -9   0 166.398 8.03767   1
  -2  -9   0 170.877 6.99175   4
   2   9   0 177.498 9.26916   1
   2   9   0 167.669 8.60653   4
   2   9   0 194.263 14.6311   2
  -3  -9   0 57.5588 9.06845   3
  -3  -9   0 43.7969 5.30262   1
  -3  -9   0 46.3898 3.85503   4
   3   9   0 53.1512 4.47474   4
   3   9   0 47.3052 8.85433   2
  -4  -9   0 7.48915 3.07250   3
  -4  -9   0 3.25906 1.69915   4
  -4  -9   0 4.79997 2.07595   1
   4   9   0 6.00246 4.42163   2
   4   9   0 2.99359 1.62896   4
   4   9   0 0.88772 1.54335   1
  -5  -9   0 1.81892 2.44390   3
  -5  -9   0 0.18837 1.34442   1
  -5  -9   0 2.07488 1.48391   4
   5   9   0 0.77477 1.39582   4
   5   9   0 3.77538 2.45651   1
   5   9   0 4.75534 4.52204   2
  -6  -9   0 63.7181 7.36572   4
  -6  -9   0 52.1856 9.28588   3
   6   9   0 65.6223 14.2105   2
   6   9   0 56.2386 8.24201   1
  -7  -9   0 3.04252 2.83748   3
  -7  -9   0 3.37815 2.19672   4
   7   9   0 2.08234 2.67270   2
   7   9   0 3.48417 2.64248   1
  -8  -9   0 14.6315 5.12397   3
  -8  -9   0 9.49093 3.63227   4
   8   9   0 21.8873 13.0852   2
   8   9   0 12.1601 4.54750   1
 -11  10   0 13.6931 4.03290   3
 -11  10   0 9.56903 4.17121   4
 -10  10   0 51.8996 8.06620   3
 -10  10   0 43.4110 11.2823   2
 -10  10   0 44.6560 8.77995   4
  -9  10   0 1.25302 2.32520   2
  -9  10   0 0.82878 1.71165   4
  -9  10   0 2.51445 2.18978   3
  -8  10   0 15.8447 5.40273   2
  -8  10   0 14.2064 4.27147   3
  -8  10   0 21.2106 5.35781   4
   7 -10   0 195.150 12.3324   3
  -7  10   0 191.467 18.4295   2
  -7  10   0 202.704 12.2215   4
  -7  10   0 193.325 10.5108   4
   6 -10   0 199.959 12.4878   3
  -6  10   0 215.578 11.6100   4
  -6  10   0 188.680 15.2021   2
  -6  10   0 189.784 9.68787   4
   5 -10   0 99.9700 8.73611   3
  -5  10   0 96.7551 5.95550   4
  -5  10   0 101.016 7.10023   4
  -5  10   0 106.697 10.8591   2
   4 -10   0 128.845 9.99113   3
  -4  10   0 125.233 11.5962   2
  -4  10   0 143.752 7.63977   4
  -4  10   0 141.638 6.66398   4
   3 -10   0 917.611 31.5709   3
  -3  10   0 874.951 22.6390   4
  -3  10   0 926.682 23.7309   4
  -3  10   0 880.305 34.1436   2
   2 -10   0 646.157 25.4703   3
  -2  10   0 671.596 16.7260   4
  -2  10   0 652.653 18.5108   1
  -2  10   0 656.229 28.3026   2
  -2  10   0 641.432 16.2178   4
   1 -10   0 548.213 23.0221   3
  -1  10   0 547.855 25.4372   2
  -1  10   0 541.354 16.9677   1
   0 -10   0 961.661 25.5255   1
   0 -10   0 1005.63 34.2385   3
   0  10   0 981.573 27.4141   1
   0  10   0 1023.18 37.5090   2
  -1 -10   0 1304.73 41.1730   3
   1  10   0 1242.42 34.4302   1
   1  10   0 1290.16 45.2287   2
  -2 -10   0 590.428 15.5653   4
  -2 -10   0 594.157 18.4331   1
   2  10   0 555.442 27.7698   2
   2  10   0 570.848 16.5529   4
   2  10   0 558.739 19.8150   1
  -3 -10   0 398.123 14.7939   1
  -3 -10   0 412.439 20.4676   3
  -3 -10   0 420.625 13.2428   4
   3  10   0 402.641 14.1415   4
   3  10   0 386.935 23.8702   2
  -4 -10   0 825.668 25.7598   1
  -4 -10   0 911.996 33.3920   3
  -4 -10   0 881.131 24.6489   4
   4  10   0 886.235 39.9694   2
   4  10   0 865.707 26.0370   4
   4  10   0 889.471 28.8477   1
  -5 -10   0 645.125 27.8703   3
  -5 -10   0 688.837 21.7271   4
   5  10   0 624.387 34.7830   2
   5  10   0 684.882 25.1836   1
   5  10   0 687.757 27.9046   4
  -6 -10   0 494.375 23.7102   3
  -6 -10   0 473.365 18.1578   4
   6  10   0 476.750 21.1079   1
   6  10   0 492.302 31.7487   2
  -7 -10   0 457.699 18.6774   4
  -7 -10   0 429.459 22.4510   3
   7  10   0 457.914 33.4863   2
   7  10   0 462.825 21.3405   1
 -10  11   0 524.898 31.2920   2
 -10  11   0 494.388 22.4649   3
 -10  11   0 500.469 24.4577   4
  -9  11   0 620.139 33.2386   2
  -9  11   0 606.589 25.7724   3
  -8  11   0 544.007 24.2005   3
  -8  11   0 556.659 23.4114   4
  -8  11   0 565.346 30.3396   2
   7 -11   0 263.423 15.3174   3
  -7  11   0 283.635 19.9007   2
  -7  11   0 271.681 12.5493   4
  -7  11   0 261.925 14.0875   4
   6 -11   0 775.898 29.0662   3
  -6  11   0 788.289 25.6754   4
  -6  11   0 751.395 23.1136   4
   5 -11   0 41.8552 6.79525   3
  -5  11   0 54.2866 4.28292   4
  -5  11   0 56.7274 10.2911   2
  -5  11   0 58.7018 5.19305   4
   4 -11   0 280.066 16.1499   3
  -4  11   0 325.093 11.8632   4
  -4  11   0 310.536 10.7179   4
  -4  11   0 321.799 19.5883   2
   3 -11   0 448.842 20.8292   3
  -3  11   0 417.438 22.5702   2
  -3  11   0 443.411 12.8206   4
  -3  11   0 437.628 13.5533   1
  -3  11   0 437.378 12.2893   4
   2 -11   0 390.176 22.8042   3
  -2  11   0 390.334 13.4434   1
  -2  11   0 414.244 22.2345   2
  -1  11   0 447.411 23.5125   2
  -1  11   0 441.280 15.3366   1
   0 -11   0 565.486 24.5659   3
   0 -11   0 512.391 16.2360   1
   0  11   0 534.126 26.6041   2
  -1 -11   0 126.796 6.98357   1
  -1 -11   0 123.068 10.9000   3
   1  11   0 110.679 7.66815   1
   1  11   0 143.407 13.4317   2
  -2 -11   0 12.0996 4.27018   3
  -2 -11   0 6.54693 1.95749   1
   2  11   0 12.5024 3.53493   1
   2  11   0 9.92709 5.38553   2
  -3 -11   0 87.3055 4.66883   4
  -3 -11   0 84.2995 11.5852   3
  -3 -11   0 80.1133 6.12584   1
   3  11   0 94.0408 7.75606   1
   3  11   0 78.9326 12.6654   2
  -4 -11   0 1.88051 1.16896   4
  -4 -11   0 1.62404 2.90502   3
  -4 -11   0 2.66028 1.41567   4
   4  11   0 2.12401 2.48928   2
   4  11   0 0.31920 1.44090   1
  -5 -11   0 10.2032 4.53741   3
   5  11   0 6.99932 4.95358   2
   5  11   0 10.2572 3.88146   1
  -6 -11   0 19.9645 6.13309   3
   6  11   0 18.9060 7.19449   2
   6  11   0 12.8470 3.86769   1
 -10  12   0 34.9765 7.23933   4
 -10  12   0 45.0841 8.84123   3
 -10  12   0 41.7825 10.6965   2
  -9  12   0 61.3433 13.0062   2
  -9  12   0 59.6070 9.11791   4
  -9  12   0 70.1527 10.3559   3
  -8  12   0 346.129 17.4561   4
  -8  12   0 345.606 19.5655   3
  -8  12   0 338.147 23.3791   2
   7 -12   0 373.489 19.6670   3
  -7  12   0 395.880 15.5010   4
  -7  12   0 418.525 17.9579   4
  -7  12   0 405.220 24.7466   2
   6 -12   0 344.997 18.6942   3
  -6  12   0 363.388 22.5894   2
  -6  12   0 329.788 13.0731   4
  -6  12   0 347.800 14.8970   4
   5 -12   0 281.448 16.9310   3
  -5  12   0 308.415 12.3969   4
  -5  12   0 299.733 11.1393   4
  -5  12   0 310.093 20.4037   2
   4 -12   0 317.435 17.7771   3
  -4  12   0 284.548 10.1999   4
  -4  12   0 286.383 9.73454   4
   3 -12   0 742.775 29.8634   3
  -3  12   0 806.250 34.9919   2
   2 -12   0 889.039 33.0491   3
  -2  12   0 779.437 25.5913   1
  -2  12   0 853.365 35.8386   2
   1 -12   0 911.143 34.1781   3
  -1  12   0 850.771 25.3158   1
  -1  12   0 821.425 40.4711   2
   0  12   0 1215.71 34.3831   1
   0  12   0 1271.93 46.8627   2
  -1 -12   0 920.527 35.6124   3
   1  12   0 956.764 40.2494   2
   1  12   0 931.146 28.8960   1
  -2 -12   0 971.014 37.0899   3
   2  12   0 1018.77 42.8318   2
   2  12   0 968.928 30.9309   1
  -3 -12   0 544.239 26.3913   3
   3  12   0 587.812 32.3580   2
   3  12   0 563.038 22.0902   1
  -4 -12   0 310.214 19.3236   3
   4  12   0 293.932 23.3805   2
  -5 -12   0 395.896 22.2976   3
   5  12   0 332.940 27.4364   2
  -9  13   0 75.7597 10.8022   3
  -9  13   0 117.461 23.0135   2
  -9  13   0 103.888 9.57981   4
  -8  13   0 271.111 20.9732   2
  -8  13   0 255.579 17.3800   3
  -8  13   0 234.775 13.7759   4
   7 -13   0 319.864 18.7753   3
  -7  13   0 337.268 23.1459   2
  -7  13   0 352.162 15.6778   4
   6 -13   0 95.4214 12.0574   3
  -6  13   0 89.6273 13.1302   2
   5 -13   0 35.8112 7.56403   3
  -5  13   0 41.0147 8.78405   2
  -5  13   0 42.6495 3.72394   4
  -5  13   0 36.2944 4.43988   4
   4 -13   0 140.141 12.4402   3
  -4  13   0 140.049 13.9004   2
   3 -13   0 43.5820 8.57971   3
  -3  13   0 44.5697 9.08086   2
   2 -13   0 32.2052 7.09774   3
  -2  13   0 28.3232 7.41977   2
   1 -13   0 27.4257 7.29596   3
  -1  13   0 25.7375 7.10800   2
   0 -13   0 27.2562 6.76882   3
   0  13   0 52.7504 10.8924   2
  -1 -13   0 8.69428 4.54942   3
   1  13   0 5.86335 3.66720   2
  -2 -13   0 49.9845 10.2848   3
   2  13   0 45.2113 10.7444   2
  -3 -13   0 72.4787 12.5102   3
   3  13   0 67.8427 13.1924   2
   7 -14   0 257.503 17.3607   3
  -7  14   0 281.093 21.6063   2
   6 -14   0 234.343 16.5594   3
  -6  14   0 248.517 19.8612   2
   5 -14   0 649.400 29.6373   3
  -5  14   0 706.543 34.3547   2
   4 -14   0 567.676 27.1571   3
  -4  14   0 515.138 29.0381   2
   3 -14   0 419.097 23.2959   3
  -3  14   0 471.780 27.4306   2
   2 -14   0 461.426 24.7131   3
  -2  14   0 474.046 27.2966   2
  -1  14   0 576.169 30.9430   2
   0 -14   0 407.031 23.3437   3
   0  14   0 384.710 25.1543   2
  -1 -14   0 207.091 16.5174   3
   1  14   0 227.759 19.3874   2
   4 -15   0 3.78069 3.45556   3
  -4  15   0 4.30311 3.82754   2
   3 -15   0 22.4130 7.17778   3
  -3  15   0 13.0767 5.50149   2
   2 -15   0 16.9562 5.63430   3
  -2  15   0 19.7220 6.25469   2
  -1  15  -1 322.179 22.6459   2
   1 -15   1 309.668 20.8061   3
  -2  15  -1 268.338 20.3652   2
   2 -15   1 300.304 20.0626   3
  -3  15  -1 191.713 17.0913   2
   3 -15   1 206.127 16.4447   3
  -4  15  -1 388.288 24.7091   2
   4 -15   1 372.794 22.2372   3
  -5  15  -1 327.087 22.7415   2
   5 -15   1 332.119 20.8644   3
   2  14  -1 58.0777 11.6312   2
  -2 -14   1 82.2277 12.9935   3
   1  14  -1 12.0476 5.27496   2
  -1 -14   1 11.7653 5.01386   3
   0  14  -1 31.8490 8.01735   2
  -1  14  -1 13.8062 5.59890   2
   1 -14   1 11.0246 4.33519   3
  -2  14  -1 27.0923 7.69388   2
   2 -14   1 28.3673 6.70282   3
  -3  14  -1 49.6453 11.1066   2
   3 -14   1 33.1412 7.31817   3
  -4  14  -1 43.1553 9.60914   2
   4 -14   1 28.1765 6.91729   3
  -5  14  -1 42.6393 9.36849   2
  -5  14  -1 45.9145 4.20031   4
   5 -14   1 49.5265 9.59166   3
  -6  14  -1 45.1926 10.7034   2
  -6  14  -1 32.8546 4.99375   4
   6 -14   1 31.8744 7.92293   3
  -7  14  -1 83.1528 12.9711   3
  -7  14  -1 79.7229 7.31690   4
  -7  14  -1 106.430 16.1871   2
   4  13  -1 316.153 24.4546   2
  -4 -13   1 314.193 20.1313   3
   3  13  -1 505.177 30.2369   2
  -3 -13   1 563.744 34.2252   3
   2  13  -1 643.760 33.5170   2
  -2 -13   1 712.666 31.0986   3
   1  13  -1 569.721 30.0190   2
  -1 -13   1 648.716 29.0939   3
   0  13  -1 663.245 31.9405   2
   0 -13   1 687.840 30.2003   3
  -1  13  -1 529.376 27.4302   2
   1 -13   1 543.263 25.8623   3
  -2  13  -1 503.551 26.2812   2
   2 -13   1 490.384 24.3714   3
  -3  13  -1 592.143 29.0039   2
   3 -13   1 634.393 27.9316   3
  -4  13  -1 606.878 18.5364   4
  -4  13  -1 590.266 29.0957   2
  -4  13  -1 575.457 17.2870   4
   4 -13   1 653.275 28.1578   3
  -5  13  -1 367.870 15.7516   4
  -5  13  -1 334.134 12.7908   4
  -5  13  -1 309.128 20.8291   2
   5 -13   1 369.531 20.1074   3
  -6  13  -1 329.885 14.8440   4
  -6  13  -1 280.846 20.1544   2
   6 -13   1 319.815 18.7134   3
  -7  13  -1 296.510 15.2564   4
  -7  13  -1 303.414 19.3461   3
  -7  13  -1 290.718 20.8343   2
  -8  13  -1 200.325 15.6206   3
  -8  13  -1 195.420 12.9648   4
  -8  13  -1 200.537 17.6829   2
  -9  13  -1 113.554 14.6164   3
  -9  13  -1 95.3141 11.2840   4
  -9  13  -1 82.5922 14.6783   2
   5  12  -1 5.79308 4.03360   2
  -5 -12   1 7.95689 6.38136   3
   4  12  -1 11.4149 4.65722   1
   4  12  -1 13.8764 5.74506   2
  -4 -12   1 11.4837 4.63002   3
   3  12  -1 42.3065 6.59496   1
   3  12  -1 32.1586 8.79754   2
  -3 -12   1 31.7053 7.33590   3
   2  12  -1 -0.2003 1.60767   1
   2  12  -1 4.93185 3.59389   2
  -2 -12   1 14.6374 5.10472   3
   1  12  -1 245.528 12.1374   1
  -1 -12   1 244.135 10.5644   1
  -1 -12   1 245.953 16.4632   3
   0  12  -1 286.136 18.9270   2
   0  12  -1 255.831 11.9173   1
   0 -12   1 271.457 17.0396   3
  -1  12  -1 384.175 14.4475   1
  -1  12  -1 397.589 22.1938   2
   1 -12   1 393.030 20.7215   3
  -2  12  -1 169.614 6.55755   4
  -2  12  -1 184.526 14.6433   2
  -2  12  -1 177.378 8.58221   1
  -2  12  -1 173.858 6.87961   4
   2 -12   1 160.281 12.7458   3
  -3  12  -1 243.916 16.9651   2
  -3  12  -1 253.705 9.86969   4
  -3  12  -1 228.768 10.4284   4
   3 -12   1 226.076 15.2422   3
  -4  12  -1 623.405 19.5265   4
  -4  12  -1 590.832 27.8082   2
  -4  12  -1 564.819 17.6574   4
   4 -12   1 569.083 25.4333   3
  -5  12  -1 384.478 22.4221   2
  -5  12  -1 349.155 13.3315   4
  -5  12  -1 348.564 15.4862   4
   5 -12   1 358.930 19.0746   3
  -6  12  -1 806.499 35.0082   2
  -6  12  -1 830.301 27.4297   4
  -6  12  -1 776.813 24.4020   4
   6 -12   1 794.128 30.8353   3
  -7  12  -1 769.755 31.5561   3
  -7  12  -1 772.640 35.3670   2
  -7  12  -1 741.634 27.3788   4
  -8  12  -1 377.234 19.0069   4
  -8  12  -1 400.724 24.9552   2
  -8  12  -1 375.045 20.7695   3
  -9  12  -1 343.372 24.0599   2
  -9  12  -1 348.464 19.0499   4
  -9  12  -1 334.694 19.4106   3
 -10  12  -1 244.250 31.7339   2
 -10  12  -1 247.716 16.3489   3
 -10  12  -1 264.089 17.3682   4
   6  11  -1 308.946 24.7315   2
   6  11  -1 287.384 16.2523   1
  -6 -11   1 307.030 18.7434   3
  -6 -11   1 267.262 13.1435   4
   5  11  -1 667.728 25.4072   1
   5  11  -1 675.180 36.0852   2
  -5 -11   1 622.536 28.0976   3
  -5 -11   1 630.719 21.0431   4
   4  11  -1 611.260 32.5268   2
   4  11  -1 583.336 20.9070   4
   4  11  -1 623.951 23.3994   1
  -4 -11   1 624.463 19.4473   4
  -4 -11   1 622.246 24.2958   1
  -4 -11   1 599.831 26.9527   3
   3  11  -1 430.846 17.9226   1
   3  11  -1 452.578 26.2176   2
   3  11  -1 411.709 15.4993   4
  -3 -11   1 441.875 22.0893   3
  -3 -11   1 441.394 16.0818   1
  -3 -11   1 431.129 14.1968   4
   2  11  -1 745.092 24.6937   1
   2  11  -1 759.687 33.8112   2
   2  11  -1 720.862 21.5130   4
  -2 -11   1 737.819 22.4539   1
  -2 -11   1 793.788 20.4926   4
  -2 -11   1 763.247 30.4131   3
   1  11  -1 1149.55 42.3084   2
   1  11  -1 1095.74 31.9082   1
   1  11  -1 1114.54 28.8508   4
  -1 -11   1 1150.37 30.1379   1
  -1 -11   1 1115.98 27.3607   4
  -1 -11   1 1185.73 39.7846   3
   0  11  -1 773.746 31.6501   2
   0  11  -1 717.884 22.3269   1
   0  11  -1 695.371 19.1438   4
   0 -11   1 723.904 18.5655   4
   0 -11   1 712.951 28.7863   3
   0 -11   1 763.672 20.9619   1
  -1  11  -1 50.9470 3.50649   4
  -1  11  -1 56.4311 4.66377   1
  -1  11  -1 78.9754 12.2430   2
   1 -11   1 58.9061 3.59696   4
   1 -11   1 55.9622 3.99717   1
  -2  11  -1 307.869 10.5443   4
  -2  11  -1 316.577 11.3024   1
  -2  11  -1 315.198 10.9934   4
  -2  11  -1 306.791 18.2364   2
   2 -11   1 299.393 16.8858   3
  -3  11  -1 397.571 12.3518   1
  -3  11  -1 377.266 12.8970   4
  -3  11  -1 407.262 14.1023   4
  -3  11  -1 384.004 20.7481   2
   3 -11   1 419.552 19.9678   3
  -4  11  -1 90.2289 5.72184   4
  -4  11  -1 104.054 10.5330   2
  -4  11  -1 96.7254 6.68182   4
   4 -11   1 94.2193 9.08978   3
  -5  11  -1 196.728 14.9670   2
  -5  11  -1 195.782 9.33145   4
  -5  11  -1 209.819 11.1537   4
   5 -11   1 202.485 13.2228   3
  -6  11  -1 89.4954 7.81034   4
  -6  11  -1 81.5688 6.17155   4
  -6  11  -1 85.8722 13.1044   2
   6 -11   1 81.7232 10.5696   3
  -7  11  -1 139.293 11.6636   3
  -7  11  -1 120.678 15.8180   2
  -7  11  -1 123.468 9.89304   4
  -8  11  -1 12.3405 4.17430   4
  -8  11  -1 12.6526 5.37155   2
  -8  11  -1 19.5434 5.76201   3
  -9  11  -1 2.61765 1.99987   4
  -9  11  -1 2.38543 3.19109   2
  -9  11  -1 7.71870 3.96750   3
 -10  11  -1 71.9932 13.8570   2
 -10  11  -1 58.8878 9.67866   4
   7  10  -1 24.6740 5.60550   1
   7  10  -1 16.3148 6.29236   2
  -7 -10   1 27.6984 5.22713   4
  -7 -10   1 19.2878 4.96225   3
   6  10  -1 33.4680 8.86453   2
   6  10  -1 40.8687 6.89340   1
  -6 -10   1 41.4827 6.12512   4
  -6 -10   1 32.9645 7.17060   3
   5  10  -1 64.5276 7.79128   4
   5  10  -1 67.2276 7.63739   1
   5  10  -1 73.7699 13.2839   2
  -5 -10   1 92.5389 11.8712   3
  -5 -10   1 84.8204 6.58299   4
   4  10  -1 157.482 9.56129   4
   4  10  -1 175.199 10.7984   1
  -4 -10   1 184.678 13.1779   3
  -4 -10   1 175.862 9.40165   1
  -4 -10   1 176.582 9.04396   4
   3  10  -1 456.884 25.1843   2
   3  10  -1 418.337 17.0822   1
   3  10  -1 418.482 15.7692   4
  -3 -10   1 444.697 14.7518   4
  -3 -10   1 446.877 20.9431   3
  -3 -10   1 423.823 15.4349   1
   2  10  -1 360.560 14.8954   1
   2  10  -1 355.137 13.3040   4
   2  10  -1 377.846 21.5424   2
  -2 -10   1 379.043 13.5796   1
  -2 -10   1 363.362 12.3013   4
  -2 -10   1 385.837 19.0034   3
   1  10  -1 99.4591 6.78250   1
   1  10  -1 107.478 10.6521   2
  -1 -10   1 109.006 6.13196   1
  -1 -10   1 94.7478 9.11000   3
  -1 -10   1 104.475 5.25767   4
   0  10  -1 735.176 25.2871   1
   0  10  -1 877.437 32.1525   2
   0  10  -1 778.865 20.8177   4
   0 -10   1 800.059 20.2160   4
   0 -10   1 780.150 21.3274   1
   0 -10   1 767.121 29.0609   3
   0 -10   1 732.872 33.5809   2
  -1  10  -1 482.573 14.5294   4
  -1  10  -1 508.719 15.9726   1
  -1  10  -1 512.371 23.6722   2
   1 -10   1 521.685 14.7398   1
   1 -10   1 494.177 21.5682   3
   1 -10   1 477.315 23.0100   2
   1 -10   1 515.023 14.5201   4
  -2  10  -1 715.552 28.7571   2
  -2  10  -1 694.814 19.2547   1
   2 -10   1 675.083 26.0218   3
   2 -10   1 718.699 19.5308   4
   2 -10   1 685.046 28.7860   2
  -3  10  -1 703.368 20.7377   4
  -3  10  -1 631.763 28.8020   2
  -3  10  -1 699.412 19.6999   4
  -3  10  -1 677.115 18.0329   1
  -3  10  -1 731.201 28.9081   2
   3 -10   1 708.977 26.3729   3
  -4  10  -1 833.334 25.2106   4
  -4  10  -1 829.796 23.4036   4
  -4  10  -1 833.646 32.1725   2
   4 -10   1 846.739 29.6965   3
  -5  10  -1 1087.97 31.9157   4
  -5  10  -1 1059.77 29.1776   4
  -5  10  -1 1096.88 39.0500   2
   5 -10   1 1034.19 34.4437   3
  -6  10  -1 1604.37 42.8729   4
  -6  10  -1 1739.57 46.6673   4
  -6  10  -1 1568.75 52.6231   2
   6 -10   1 1683.95 47.9931   3
  -7  10  -1 954.950 33.8525   3
  -7  10  -1 1003.12 39.5949   2
  -7  10  -1 1013.18 33.4853   4
  -8  10  -1 699.995 33.2545   2
  -8  10  -1 668.911 27.1313   4
  -8  10  -1 660.893 26.6940   3
  -9  10  -1 423.115 21.7089   4
  -9  10  -1 479.157 21.2694   3
  -9  10  -1 441.160 26.8802   2
 -10  10  -1 531.539 31.3186   2
 -10  10  -1 524.574 25.6241   4
 -10  10  -1 529.756 22.6183   3
 -11  10  -1 318.915 26.3972   2
 -11  10  -1 340.610 16.8672   3
 -11  10  -1 365.295 21.8144   4
   8   9  -1 185.516 12.9958   1
   8   9  -1 198.049 20.8827   2
  -8  -9   1 168.016 12.7555   3
  -8  -9   1 179.740 12.1433   4
   7   9  -1 523.107 22.0641   1
   7   9  -1 469.358 31.0413   2
  -7  -9   1 485.597 20.3409   4
  -7  -9   1 491.344 22.5088   3
   6   9  -1 296.097 15.2974   1
   6   9  -1 275.590 22.1481   2
  -6  -9   1 315.588 14.6383   4
  -6  -9   1 322.438 17.4813   3
   5   9  -1 742.551 25.6785   1
   5   9  -1 729.191 25.6070   4
  -5  -9   1 763.850 24.0079   4
  -5  -9   1 704.077 25.1865   1
   4   9  -1 211.139 11.1239   4
   4   9  -1 202.784 11.1630   1
   4   9  -1 206.620 16.5576   2
  -4  -9   1 198.063 9.92176   1
  -4  -9   1 216.290 13.5735   3
  -4  -9   1 216.263 10.2371   4
   3   9  -1 419.941 15.9198   4
   3   9  -1 429.318 23.4177   2
   3   9  -1 447.768 16.9457   1
  -3  -9   1 416.640 19.5566   3
  -3  -9   1 440.954 15.3362   1
  -3  -9   1 442.676 14.9095   4
   2   9  -1 233.606 10.1913   4
   2   9  -1 241.775 11.1009   1
   2   9  -1 237.703 15.8905   2
  -2  -9   1 241.019 19.0008   2
  -2  -9   1 243.804 10.0094   1
  -2  -9   1 251.668 14.3713   3
  -2  -9   1 247.643 9.53010   4
   1   9  -1 309.313 12.2883   1
   1   9  -1 321.266 17.9495   2
   1   9  -1 317.604 13.7089   4
  -1  -9   1 308.277 15.7741   3
  -1  -9   1 310.532 16.8990   2
  -1  -9   1 320.294 10.6694   4
   0   9  -1 504.300 14.9899   4
   0   9  -1 529.703 22.9433   2
   0   9  -1 527.055 16.3433   1
   0  -9   1 520.878 14.5423   4
   0  -9   1 486.570 20.7902   3
   0  -9   1 496.696 22.0692   2
   0  -9   1 500.014 14.9641   1
  -1   9  -1 204.891 13.1805   2
  -1   9  -1 200.433 7.82633   4
  -1   9  -1 211.059 8.43349   1
   1  -9   1 203.087 7.74435   4
   1  -9   1 206.351 12.4163   3
  -2   9  -1 110.048 9.47327   2
  -2   9  -1 111.450 5.30847   1
   2  -9   1 106.066 5.63997   4
   2  -9   1 93.0577 8.26161   3
  -3   9  -1 691.000 26.9995   2
  -3   9  -1 720.992 20.8659   4
  -3   9  -1 644.548 28.1553   2
  -3   9  -1 690.080 19.4738   4
   3  -9   1 704.597 25.1582   3
  -4   9  -1 0.34234 0.90744   2
  -4   9  -1 1.53435 2.89101   3
  -4   9  -1 0.45178 0.85318   4
  -4   9  -1 1.12802 1.31114   4
  -4   9  -1 6.45906 3.38141   2
   4  -9   1 0.55204 1.47211   3
  -5   9  -1 -0.2794 1.07214   4
  -5   9  -1 0.18819 1.22294   3
  -5   9  -1 -0.4533 1.54224   2
  -5   9  -1 1.06779 1.19400   4
  -5   9  -1 1.08907 1.99100   2
   5  -9   1 -0.7085 1.40798   3
  -6   9  -1 272.128 17.1432   3
  -6   9  -1 289.879 17.8547   2
  -6   9  -1 279.626 14.1684   4
  -6   9  -1 281.790 12.4569   4
   6  -9   1 275.619 14.3426   3
  -7   9  -1 208.093 12.7749   3
  -7   9  -1 175.300 11.8657   4
  -7   9  -1 197.278 15.3724   2
  -8   9  -1 166.932 15.1538   2
  -8   9  -1 156.794 11.0905   3
  -8   9  -1 161.003 12.0017   4
  -9   9  -1 69.4936 12.2655   2
  -9   9  -1 62.8461 12.4627   4
  -9   9  -1 74.3838 9.54487   3
 -10   9  -1 186.714 11.7135   3
 -10   9  -1 198.540 15.0196   4
 -10   9  -1 194.650 18.0770   2
 -11   9  -1 195.272 11.5992   3
 -11   9  -1 221.832 20.3837   2
 -11   9  -1 195.260 15.7788   4
   9   8  -1 97.2914 19.3973   2
   9   8  -1 88.4530 10.5700   1
  -9  -8   1 96.2275 9.20643   3
  -9  -8   1 88.7227 10.8240   4
   8   8  -1 304.976 16.4987   1
   8   8  -1 282.864 24.5886   2
  -8  -8   1 312.070 16.4319   4
  -8  -8   1 307.667 16.5718   3
   7   8  -1 66.5740 12.2794   2
   7   8  -1 71.8308 9.53517   1
  -7  -8   1 79.1835 7.55548   4
   6   8  -1 33.7283 8.48370   2
   6   8  -1 45.9852 6.35403   1
  -6  -8   1 51.0231 7.68389   3
  -6  -8   1 49.8219 6.75273   4
   5   8  -1 189.127 11.1669   4
   5   8  -1 194.161 10.9672   1
   5   8  -1 174.361 15.7296   2
  -5  -8   1 192.855 10.3682   4
  -5  -8   1 170.499 11.7354   3
  -5  -8   1 174.960 9.59025   1
   4   8  -1 830.750 25.9308   1
   4   8  -1 818.417 34.6203   2
   4   8  -1 794.208 25.8943   4
  -4  -8   1 875.279 25.1895   4
  -4  -8   1 783.390 23.6607   1
  -4  -8   1 797.352 28.4383   3
   3   8  -1 2460.99 69.0657   2
   3   8  -1 2339.78 57.3632   4
  -3  -8   1 2334.17 65.1913   2
   2   8  -1 1798.30 43.4103   1
   2   8  -1 1696.62 42.3263   4
   2   8  -1 1717.62 51.7288   2
  -2  -8   1 1677.72 47.5625   3
  -2  -8   1 1715.79 50.3607   2
   1   8  -1 1155.43 30.7849   1
   1   8  -1 1176.93 36.1488   3
   1   8  -1 1225.77 38.8982   2
  -1  -8   1 1155.66 35.6853   3
  -1  -8   1 1225.39 37.8345   2
   0   8  -1 470.668 19.2154   3
   0   8  -1 465.681 14.0830   4
   0   8  -1 480.366 14.9047   1
   0   8  -1 478.893 20.6726   2
   0  -8   1 503.010 13.9715   4
   0  -8   1 446.638 19.8987   2
   0  -8   1 503.707 19.5383   3
   0  -8   1 482.919 13.9367   1
  -1   8  -1 1438.38 41.7409   3
  -1   8  -1 1525.16 35.3032   1
   1  -8   1 1494.07 41.9324   3
   1  -8   1 1460.15 43.4700   2
  -2   8  -1 1717.84 47.1216   3
  -2   8  -1 1751.47 39.4822   1
   2  -8   1 1743.06 49.9405   2
  -3   8  -1 982.369 34.6031   2
  -3   8  -1 989.307 30.9868   3
  -3   8  -1 999.508 32.8475   2
  -3   8  -1 998.311 25.7135   4
  -3   8  -1 984.444 23.0319   1
   3  -8   1 1017.53 30.9572   3
   3  -8   1 1017.20 26.9321   4
  -4   8  -1 989.576 33.7493   2
  -4   8  -1 1054.27 28.9148   4
  -4   8  -1 995.483 26.7930   4
  -4   8  -1 977.545 35.9112   2
  -4   8  -1 975.100 30.8536   3
   4  -8   1 1026.76 31.1616   3
  -5   8  -1 908.514 29.2741   3
  -5   8  -1 934.558 26.5260   4
  -5   8  -1 887.545 32.9347   2
  -5   8  -1 968.482 38.9376   4
  -5   8  -1 964.502 36.5261   2
   5  -8   1 925.487 29.1342   3
  -6   8  -1 1297.72 50.2977   2
  -6   8  -1 1312.41 38.1346   3
  -6   8  -1 1375.06 39.4394   3
  -6   8  -1 1289.74 39.3609   4
  -6   8  -1 1337.49 44.7087   2
  -6   8  -1 1342.26 39.0497   4
  -7   8  -1 655.737 24.6743   4
  -7   8  -1 612.800 28.5822   2
  -7   8  -1 580.505 21.8781   3
  -7   8  -1 602.718 24.0636   4
  -7   8  -1 658.306 23.6495   3
  -8   8  -1 376.158 19.0370   4
  -8   8  -1 364.476 16.5952   3
  -8   8  -1 374.024 16.1625   3
  -8   8  -1 384.548 23.0040   2
  -9   8  -1 544.513 28.7593   4
  -9   8  -1 541.745 20.6033   3
  -9   8  -1 606.812 31.1290   2
  -9   8  -1 583.379 21.8187   3
 -10   8  -1 179.668 10.3533   3
 -10   8  -1 215.733 18.8478   2
 -10   8  -1 189.049 11.0300   3
 -10   8  -1 186.587 14.4442   4
 -11   8  -1 149.158 13.6923   4
 -11   8  -1 161.075 9.63349   3
  11  -8   1 134.953 17.7240   2
 -12   8  -1 35.0748 9.66739   4
  12  -8   1 37.3563 9.72125   2
   9   7  -1 537.874 23.2612   1
   9   7  -1 496.212 34.0935   2
  -9  -7   1 577.372 24.7821   4
  -9  -7   1 557.379 25.4281   3
   8   7  -1 413.907 29.3108   2
   8   7  -1 412.470 19.1912   1
  -8  -7   1 423.648 20.0868   4
  -8  -7   1 447.497 19.5189   3
   7   7  -1 588.380 33.1024   2
   7   7  -1 580.408 22.2985   1
  -7  -7   1 577.573 22.8744   3
  -7  -7   1 570.263 22.6498   4
   6   7  -1 543.161 20.4729   1
   6   7  -1 489.173 28.6731   2
  -6  -7   1 544.765 20.7401   4
  -6  -7   1 563.559 22.1178   3
   5   7  -1 520.125 27.2956   2
   5   7  -1 521.695 19.0941   1
   5   7  -1 485.782 19.7890   4
  -5  -7   1 505.292 17.3642   1
  -5  -7   1 538.642 20.9733   3
  -5  -7   1 527.587 18.9038   4
   4   7  -1 18.7230 3.80102   1
   4   7  -1 18.2590 4.14863   3
   4   7  -1 21.5403 4.17017   4
   4   7  -1 28.2094 7.48105   2
  -4  -7   1 26.3075 4.71630   4
  -4  -7   1 15.5240 2.74764   1
  -4  -7   1 29.1458 6.70099   2
  -4  -7   1 38.0029 6.71137   3
   3   7  -1 150.364 10.1570   3
   3   7  -1 178.029 9.95299   1
   3   7  -1 178.849 13.2709   2
   3   7  -1 176.022 9.02023   4
  -3  -7   1 177.447 10.7899   3
  -3  -7   1 181.496 12.3019   2
  -3  -7   1 196.531 8.78746   4
  -3  -7   1 178.568 8.21472   1
   2   7  -1 45.5128 7.01631   3
   2   7  -1 64.6004 9.87327   2
   2   7  -1 44.6978 5.01952   1
   2   7  -1 36.3587 4.43677   4
  -2  -7   1 23.1089 2.85239   1
  -2  -7   1 50.7967 7.89178   2
  -2  -7   1 29.0594 5.02788   3
  -2  -7   1 35.4382 3.98980   4
   1   7  -1 429.308 18.7323   2
   1   7  -1 400.470 13.1513   4
   1   7  -1 416.685 13.5454   1
  -1  -7   1 425.106 18.1977   2
  -1  -7   1 417.614 16.8562   3
  -1  -7   1 420.076 12.7272   4
   0   7  -1 113.497 8.56815   2
   0   7  -1 114.505 5.59612   1
   0   7  -1 99.2716 7.51399   3
   0   7  -1 121.371 5.52282   4
   0  -7   1 117.512 5.22256   4
   0  -7   1 113.005 8.39209   2
   0  -7   1 113.255 7.81970   3
   0  -7   1 110.961 5.08680   1
  -1   7  -1 99.7538 7.75329   2
  -1   7  -1 96.2199 7.21157   3
  -1   7  -1 86.7056 4.39065   1
  -1   7  -1 96.6752 4.80909   4
   1  -7   1 96.8609 4.73029   4
   1  -7   1 86.7175 3.99866   1
   1  -7   1 95.0030 7.64617   2
   1  -7   1 76.5377 6.54547   3
  -2   7  -1 112.161 5.41711   4
  -2   7  -1 111.327 4.49944   1
  -2   7  -1 101.955 7.39417   3
  -2   7  -1 111.544 8.33264   2
   2  -7   1 113.001 5.63713   4
   2  -7   1 113.772 4.08338   1
   2  -7   1 110.649 8.57590   2
  -3   7  -1 114.039 7.81311   3
  -3   7  -1 125.646 4.03891   1
  -3   7  -1 118.893 5.85640   4
  -3   7  -1 108.072 8.51775   2
  -3   7  -1 110.133 9.27704   2
   3  -7   1 107.832 7.58057   3
   3  -7   1 119.117 6.45798   4
  -4   7  -1 26.6510 5.54016   2
  -4   7  -1 40.0272 5.46525   3
  -4   7  -1 22.3001 5.29707   2
  -4   7  -1 35.3036 4.29359   4
  -4   7  -1 30.9766 4.66037   4
   4  -7   1 25.2040 4.21034   3
  -5   7  -1 7.66792 2.08548   4
  -5   7  -1 11.7074 3.00309   3
  -5   7  -1 3.65404 2.16072   2
  -5   7  -1 6.99453 2.80989   4
  -5   7  -1 4.82822 2.61017   2
   5  -7   1 5.05620 2.11878   3
  -6   7  -1 341.574 15.3581   3
  -6   7  -1 364.554 16.2800   4
  -6   7  -1 350.203 20.6178   2
  -6   7  -1 377.868 19.8915   2
  -6   7  -1 359.850 14.9770   3
  -7   7  -1 892.632 27.3039   3
  -7   7  -1 874.861 28.0071   3
  -7   7  -1 850.237 28.0026   4
  -7   7  -1 876.754 30.1803   4
  -7   7  -1 911.216 35.6499   2
  -8   7  -1 705.592 23.7309   3
  -8   7  -1 664.915 22.6359   3
  -8   7  -1 680.371 27.2337   4
   8  -7   1 727.616 32.3021   2
  -9   7  -1 475.244 18.1564   3
  -9   7  -1 473.067 22.7944   4
  -9   7  -1 472.449 17.6945   3
 -10   7  -1 422.580 16.7233   3
 -10   7  -1 448.031 23.0817   4
 -10   7  -1 426.332 16.4243   3
  10  -7   1 459.461 27.7331   2
 -11   7  -1 894.142 36.7870   4
 -11   7  -1 881.184 29.1800   3
  11  -7   1 886.692 42.7260   2
 -12   7  -1 569.708 40.9946   4
  12  -7   1 671.272 54.0976   2
 -10  -6   1 153.957 12.8568   4
 -10  -6   1 136.790 9.80059   3
   9   6  -1 311.680 16.3171   1
  -9  -6   1 292.048 14.7921   3
  -9  -6   1 306.673 17.5284   4
   8   6  -1 982.918 31.9862   1
   8   6  -1 927.381 44.9739   2
  -8  -6   1 959.165 30.9179   3
  -8  -6   1 952.245 33.5028   4
   7   6  -1 1287.06 41.7146   1
   7   6  -1 1107.76 47.5293   2
  -7  -6   1 1128.21 34.8450   3
  -7  -6   1 1154.92 36.3769   4
   6   6  -1 1071.04 33.8133   3
   6   6  -1 1072.73 34.4973   4
   6   6  -1 1095.66 43.8392   2
   6   6  -1 1113.49 32.5632   1
  -6  -6   1 1096.43 33.2278   3
  -6  -6   1 1168.19 34.0658   4
  -6  -6   1 1032.00 31.7850   1
   5   6  -1 2464.19 62.3010   4
   5   6  -1 2430.89 62.4589   3
   5   6  -1 2447.10 72.4727   2
  -5  -6   1 2460.27 57.9722   1
   4   6  -1 1520.13 38.7128   1
   4   6  -1 1480.41 47.8112   2
   4   6  -1 1460.44 39.7925   4
  -4  -6   1 1516.03 40.9147   3
  -4  -6   1 1494.83 37.0656   1
  -4  -6   1 1502.50 38.7797   4
  -4  -6   1 1395.65 44.1210   2
  -3  -6   1 2089.24 56.3821   2
   2   6  -1 2552.46 65.8604   6
   2   6  -1 2482.75 68.6833   5
  -2  -6   1 2494.90 66.8748   5
  -2  -6   1 2533.67 65.1930   6
   1   6  -1 850.048 22.6063   4
   1   6  -1 870.817 28.1752   2
   1   6  -1 840.795 26.1612   3
  -1  -6   1 973.834 30.9237   3
  -1  -6   1 848.556 27.5331   2
   0   6  -1 1251.32 34.9629   2
   0   6  -1 1155.78 32.9364   3
   0  -6   1 1185.66 34.0568   2
  -1   6  -1 1783.14 48.5141   6
  -1   6  -1 1794.07 49.0028   5
   1  -6   1 1763.38 49.3095   5
   1  -6   1 1803.29 48.5778   6
  -2   6  -1 2140.82 55.9392   6
  -2   6  -1 2136.43 56.9028   5
   2  -6   1 2156.59 55.9069   6
   2  -6   1 2142.04 57.9846   5
  -3   6  -1 1603.22 45.7158   2
  -4   6  -1 1550.75 46.1703   2
  -4   6  -1 1559.65 40.3483   3
  -5   6  -1 307.684 16.2414   2
  -5   6  -1 293.856 16.9858   2
  -5   6  -1 329.167 13.8593   4
  -5   6  -1 279.984 12.7307   3
  -5   6  -1 302.513 12.6142   3
  -5   6  -1 301.532 12.3056   4
  -6   6  -1 1110.23 32.5095   4
  -6   6  -1 1090.65 33.9902   4
  -6   6  -1 1152.52 31.5619   3
  -6   6  -1 1161.17 32.3789   3
  -6   6  -1 1116.79 40.4170   2
   6  -6   1 1152.58 39.0170   2
  -7   6  -1 496.612 20.8074   4
  -7   6  -1 490.341 17.3480   3
  -7   6  -1 493.060 17.9145   3
  -7   6  -1 486.930 19.2740   4
   7  -6   1 514.586 24.9015   2
  -8   6  -1 510.146 18.1257   3
  -8   6  -1 520.203 17.8551   3
  -8   6  -1 497.796 22.3199   4
   8  -6   1 476.774 25.7312   2
  -9   6  -1 20.6081 5.66087   4
  -9   6  -1 27.7851 4.65400   3
  -9   6  -1 27.7123 4.43154   3
   9  -6   1 25.2164 7.46286   2
 -10   6  -1 5.96101 3.50998   4
 -10   6  -1 1.75206 1.38146   3
 -10   6  -1 7.29717 2.34690   3
  10  -6   1 1.34595 0.95391   1
  10  -6   1 -0.5193 2.16097   2
 -11   6  -1 75.8358 11.9562   4
 -11   6  -1 93.1985 6.14661   3
 -11   6  -1 95.0016 6.08837   3
  11  -6   1 97.2191 16.9111   2
  11  -6   1 79.0612 4.81121   1
 -12   6  -1 12.8792 5.29576   4
  12  -6   1 9.06581 1.86628   1
  12  -6   1 10.6805 6.23478   2
  11   5  -1 37.1195 6.61845   1
  11   5  -1 61.0125 15.8428   2
 -11  -5   1 49.7593 6.97858   3
  10   5  -1 21.2443 4.99437   1
  10   5  -1 15.8331 6.84236   2
 -10  -5   1 21.7406 5.90887   4
 -10  -5   1 24.3686 4.58525   3
   9   5  -1 112.618 8.62176   3
   9   5  -1 112.244 9.17769   1
   9   5  -1 133.752 21.5945   2
  -9  -5   1 100.784 7.82959   3
  -9  -5   1 113.590 10.3188   4
   8   5  -1 12.6724 3.55676   3
   8   5  -1 23.7604 8.66662   2
   8   5  -1 10.8715 3.73061   1
  -8  -5   1 19.5030 5.25178   4
  -8  -5   1 15.3038 4.13633   3
   7   5  -1 136.169 9.11227   3
   7   5  -1 136.669 14.4446   2
   7   5  -1 116.598 15.2444   1
  -7  -5   1 136.920 8.87502   3
  -7  -5   1 137.146 9.93672   4
   6   5  -1 127.802 8.24213   1
   6   5  -1 141.828 13.6281   2
   6   5  -1 131.506 9.44206   4
   6   5  -1 120.425 8.33899   3
  -6  -5   1 118.158 7.07645   1
  -6  -5   1 114.360 7.93861   3
  -6  -5   1 125.249 8.79583   4
   5   5  -1 66.7465 6.01933   3
   5   5  -1 73.8559 5.82060   1
   5   5  -1 63.4999 7.57291   4
   5   5  -1 83.1525 12.1788   2
  -5  -5   1 67.2475 6.04512   4
  -5  -5   1 69.8586 8.88505   2
  -5  -5   1 60.2176 4.68338   1
  -5  -5   1 57.0084 5.38191   3
   4   5  -1 5.31652 2.27508   4
   4   5  -1 1.97386 1.45777   1
   4   5  -1 4.81475 1.91036   3
   4   5  -1 1.64204 1.61157   2
  -4  -5   1 3.69873 2.28747   2
  -4  -5   1 4.67910 1.99841   4
  -4  -5   1 2.40252 1.17491   1
  -4  -5   1 -0.7727 0.68412   3
   3   5  -1 97.5752 6.61129   3
   3   5  -1 85.7352 5.78118   4
   3   5  -1 87.4320 8.06672   2
  -3  -5   1 78.1311 4.77661   1
  -3  -5   1 72.0640 5.76393   3
  -3  -5   1 81.6484 5.32517   4
  -3  -5   1 82.5245 7.09867   2
   2   5  -1 939.502 30.0065   2
   2   5  -1 931.487 27.0815   3
  -2  -5   1 974.185 29.1208   2
   1   5  -1 2004.03 52.6193   5
   1   5  -1 1924.19 50.8842   6
  -1  -5   1 1981.95 51.0414   6
  -1  -5   1 1916.37 51.4816   5
   0   5  -1 786.456 23.3040   3
   0  -5   1 838.215 26.3646   2
  -1   5  -1 1248.75 35.1126   5
  -1   5  -1 1232.72 34.7275   6
   1  -5   1 1190.95 34.3546   6
  -2   5  -1 1511.03 40.2755   6
  -2   5  -1 1479.66 42.4415   5
  -2   5  -1 1484.53 41.2195   5
   2  -5   1 1475.30 40.1207   6
  -3   5  -1 2412.06 63.0406   5
  -3   5  -1 2418.47 59.7784   6
  -3   5  -1 2448.33 64.8673   5
   3  -5   1 2438.74 60.0111   6
  -4   5  -1 719.294 26.6275   2
  -4   5  -1 749.203 22.3455   4
  -4   5  -1 731.997 21.5659   3
  -4   5  -1 740.655 21.3049   4
  -4   5  -1 755.870 25.8296   2
   4  -5   1 754.303 21.8782   3
  -5   5  -1 2605.56 70.0383   2
  -6   5  -1 1379.66 37.7842   4
  -6   5  -1 1383.81 39.3480   4
  -6   5  -1 1323.56 44.7533   2
   6  -5   1 1374.33 43.7686   2
  -7   5  -1 396.575 14.7240   3
  -7   5  -1 415.057 18.4357   4
  -7   5  -1 386.899 14.2553   3
  -7   5  -1 379.920 21.8546   2
  -7   5  -1 395.337 16.9225   4
   7  -5   1 393.276 10.1484   1
   7  -5   1 415.106 21.8210   2
  -8   5  -1 1733.91 42.8132   3
  -8   5  -1 1690.63 50.0235   4
  -8   5  -1 1700.92 42.9906   3
   8  -5   1 1672.51 37.8985   1
   8  -5   1 1683.88 55.9599   2
  -9   5  -1 2199.61 61.6216   4
  -9   5  -1 2055.73 51.2370   3
   9  -5   1 2116.27 47.8131   1
   9  -5   1 2185.43 68.9857   2
 -10   5  -1 903.088 35.1956   4
 -10   5  -1 936.656 25.7463   3
 -10   5  -1 922.190 25.9058   3
  10  -5   1 895.235 41.0641   2
  10  -5   1 891.563 23.3392   1
 -11   5  -1 464.081 15.4704   3
 -11   5  -1 511.019 26.0189   4
 -11   5  -1 477.148 15.5260   3
  11  -5   1 541.786 32.0078   2
  11  -5   1 495.530 15.0788   1
 -12   5  -1 433.390 24.8357   4
  12  -5   1 439.219 30.4656   2
  12  -5   1 401.613 13.7791   1
  11   4  -1 491.682 22.0530   1
  11   4  -1 485.135 35.5070   2
 -11  -4   1 476.999 17.4105   3
 -11  -4   1 499.690 25.1978   4
  10   4  -1 293.289 15.6318   1
  10   4  -1 258.598 23.8795   2
 -10  -4   1 285.683 12.8671   3
 -10  -4   1 319.618 18.5576   4
   9   4  -1 102.431 8.46065   1
   9   4  -1 83.0416 13.5705   2
   9   4  -1 112.640 7.94358   3
  -9  -4   1 112.626 7.63246   3
  -9  -4   1 107.202 10.0383   4
   8   4  -1 878.955 42.2996   2
   8   4  -1 841.085 26.4815   3
   8   4  -1 847.433 27.7805   1
  -8  -4   1 833.779 25.8268   3
  -8  -4   1 856.631 30.7196   4
   7   4  -1 1175.65 33.9673   1
   7   4  -1 1224.19 47.1481   2
   7   4  -1 1162.55 33.3122   3
  -7  -4   1 1174.96 36.6305   4
  -7  -4   1 1178.11 32.8553   3
   6   4  -1 1586.48 45.5835   4
   6   4  -1 1726.30 55.3084   2
   6   4  -1 1690.50 42.9289   3
  -6  -4   1 1688.91 45.3062   4
  -6  -4   1 1547.98 40.4813   1
  -6  -4   1 1655.16 42.2248   3
  -6  -4   1 1578.27 50.6861   2
   4   4  -1 1510.97 39.5903   4
  -4  -4   1 1504.12 43.1636   2
   3   4  -1 3280.34 83.3866   5
   3   4  -1 3252.64 77.2929   6
  -3  -4   1 3252.39 80.7456   5
  -3  -4   1 3243.69 76.9038   6
   2   4  -1 1397.96 40.6462   5
   2   4  -1 1364.13 37.4238   6
  -2  -4   1 1417.08 39.3934   5
  -2  -4   1 1367.12 37.3284   6
   1   4  -1 2718.53 64.7831   5
   1   4  -1 2637.52 63.2397   6
  -1  -4   1 2552.30 62.7522   6
  -1  -4   1 2637.21 63.7794   5
   0   4  -1 1502.41 39.1196   6
   0   4  -1 1538.05 39.1834   5
   0  -4   1 1475.35 38.8373   6
   0  -4   1 1497.46 38.8695   5
  -1   4  -1 40.0994 2.50648   4
  -1   4  -1 37.4174 3.42825   2
  -1   4  -1 37.6673 1.93947   1
  -1   4  -1 38.4034 3.37888   3
   1  -4   1 38.3070 2.50490   4
   1  -4   1 36.5287 1.81522   1
   1  -4   1 35.4187 3.47370   2
  -2   4  -1 166.324 6.17995   4
  -2   4  -1 148.677 8.25694   2
  -2   4  -1 152.401 8.09531   3
  -2   4  -1 147.782 7.83142   2
   2  -4   1 169.062 6.53217   4
   2  -4   1 148.277 7.00937   3
  -3   4  -1 341.615 11.8487   3
  -3   4  -1 325.488 14.3360   2
  -3   4  -1 352.591 12.3440   4
   3  -4   1 333.748 11.6425   3
   3  -4   1 343.839 11.8287   4
   3  -4   1 327.919 13.7595   2
  -4   4  -1 6.32636 1.90616   3
  -4   4  -1 4.82522 2.46149   2
  -4   4  -1 4.88488 1.60429   3
  -4   4  -1 3.71493 1.64891   4
  -4   4  -1 4.02153 1.43304   4
   4  -4   1 6.11529 2.40681   2
  -5   4  -1 57.0282 4.19258   3
  -5   4  -1 47.5024 6.09205   4
  -5   4  -1 49.3668 4.63402   4
  -5   4  -1 83.3480 11.1024   2
  -5   4  -1 50.3629 4.18491   3
  -5   4  -1 47.3670 1.79427   1
   5  -4   1 57.5451 8.48607   2
   5  -4   1 45.8624 2.06349   1
  -6   4  -1 2.87525 1.35618   3
  -6   4  -1 2.77497 1.89574   4
  -6   4  -1 1.06301 1.31971   4
  -6   4  -1 0.19157 0.96841   2
   6  -4   1 3.57334 2.49515   2
   6  -4   1 0.26510 0.50383   1
  -7   4  -1 4.23043 1.63216   3
  -7   4  -1 1.13838 1.48865   4
  -7   4  -1 3.68972 1.55698   3
  -7   4  -1 3.26739 1.98823   4
  -7   4  -1 2.41883 2.30590   2
   7  -4   1 1.59447 2.29968   2
   7  -4   1 5.48604 1.34698   1
  -8   4  -1 35.1413 4.72837   3
  -8   4  -1 28.1100 5.98477   4
  -8   4  -1 31.5666 4.18673   3
   8  -4   1 30.9814 3.38966   1
   8  -4   1 34.0998 7.94734   2
  -9   4  -1 254.331 10.4729   3
  -9   4  -1 275.289 11.0789   3
  -9   4  -1 261.940 16.1513   4
   9  -4   1 278.802 20.2699   2
   9  -4   1 264.344 9.87300   1
 -10   4  -1 121.847 11.4094   4
 -10   4  -1 91.7751 5.73594   3
 -10   4  -1 90.5641 5.80914   3
  10  -4   1 93.2121 15.9789   2
  10  -4   1 95.9124 5.87351   1
 -11   4  -1 72.0643 10.8908   4
 -11   4  -1 79.1680 4.94579   3
 -11   4  -1 76.4868 4.93784   3
  11  -4   1 52.9041 12.0853   2
  11  -4   1 83.7355 5.77401   1
 -12   4  -1 113.237 15.0850   4
  12  -4   1 108.431 19.5286   2
  12  -4   1 98.9414 6.73897   1
  11   3  -1 77.1780 15.2515   2
  11   3  -1 100.879 11.4511   1
 -11  -3   1 68.8613 10.6511   4
 -11  -3   1 79.1723 5.54381   3
  10   3  -1 4.09282 3.40797   2
  10   3  -1 4.41874 2.67885   1
  10   3  -1 6.07442 2.25377   3
 -10  -3   1 5.81241 3.47953   4
 -10  -3   1 7.20537 2.29068   3
   9   3  -1 42.4749 5.78118   3
   9   3  -1 36.3309 5.97994   1
   9   3  -1 30.4845 9.17183   2
  -9  -3   1 34.6075 4.83512   3
  -9  -3   1 31.0627 6.42609   4
   8   3  -1 100.073 16.8509   2
   8   3  -1 71.5354 5.62404   3
   8   3  -1 54.2759 6.08546   1
  -8  -3   1 75.9248 9.97755   4
  -8  -3   1 71.7022 5.37003   3
   7   3  -1 20.8451 5.93598   2
   7   3  -1 27.9324 4.09012   1
   7   3  -1 29.4051 4.42521   3
  -7  -3   1 38.3732 4.98887   3
  -7  -3   1 30.4400 5.61359   4
   6   3  -1 186.899 8.84548   3
   6   3  -1 150.061 13.2796   2
   6   3  -1 167.234 10.5887   4
   6   3  -1 177.262 9.01593   1
  -6  -3   1 179.155 8.46082   3
  -6  -3   1 152.627 11.7735   2
  -6  -3   1 178.364 10.6276   4
  -6  -3   1 169.976 8.06407   1
   5   3  -1 345.560 12.8467   3
   5   3  -1 362.283 15.2739   4
   5   3  -1 365.216 13.1367   1
   5   3  -1 374.075 19.4364   2
  -5  -3   1 391.721 15.5920   4
  -5  -3   1 367.848 12.7784   3
  -5  -3   1 365.193 17.4871   2
  -5  -3   1 346.419 12.1653   1
   4   3  -1 608.581 17.4800   1
   4   3  -1 562.536 18.9655   4
   4   3  -1 600.020 17.5912   3
   4   3  -1 576.697 23.2688   2
  -4  -3   1 570.859 21.3409   2
  -4  -3   1 596.425 18.9184   4
  -4  -3   1 558.230 16.3767   1
  -4  -3   1 545.687 16.9679   3
   3   3  -1 1114.56 35.8405   5
  -3  -3   1 1084.69 33.9317   5
  -3  -3   1 1131.11 30.3415   6
   2   3  -1 1738.99 45.5273   5
   2   3  -1 1660.50 42.0598   6
  -2  -3   1 1704.45 42.0626   6
  -2  -3   1 1714.76 44.3309   5
   1   3  -1 5329.70 117.509   6
   1   3  -1 5501.17 118.813   5
  -1  -3   1 5384.32 117.488   6
  -1  -3   1 5343.71 118.152   5
   0   3  -1 2953.00 67.1004   6
   0   3  -1 2956.59 66.6845   5
   0  -3   1 2921.57 66.9309   6
   0  -3   1 2971.93 66.6642   5
  -2   3  -1 86.0368 5.65899   2
  -2   3  -1 98.0882 4.82536   3
  -2   3  -1 102.591 4.52916   4
   2  -3   1 97.0515 4.68948   4
   2  -3   1 94.0702 5.65693   2
   2  -3   1 87.2843 4.64197   3
  -3   3  -1 2915.59 66.0428   6
  -3   3  -1 2787.31 71.0827   5
  -3   3  -1 2928.47 66.6949   6
   3  -3   1 2922.54 70.9043   5
  -4   3  -1 2792.45 63.9683   6
  -4   3  -1 2648.22 70.9001   5
  -4   3  -1 2749.08 63.0541   6
   4  -3   1 2704.39 70.7960   5
  -5   3  -1 1745.71 49.7721   2
  -5   3  -1 1706.39 43.7978   4
  -6   3  -1 813.095 22.2864   3
  -6   3  -1 790.204 30.6509   2
  -6   3  -1 794.600 25.6897   4
  -6   3  -1 827.407 23.5753   3
  -6   3  -1 807.112 26.6356   4
   6  -3   1 807.344 20.0127   1
   6  -3   1 799.599 30.9586   2
  -7   3  -1 331.620 19.3926   2
  -7   3  -1 364.437 12.6669   3
  -7   3  -1 359.803 12.3672   3
  -7   3  -1 369.455 17.2842   4
  -7   3  -1 367.362 16.3753   4
   7  -3   1 350.303 20.3646   2
   7  -3   1 369.051 11.6001   1
  -8   3  -1 973.724 26.3784   3
  -8   3  -1 970.790 26.0192   3
   8  -3   1 968.511 25.3864   1
   8  -3   1 972.138 39.5650   2
  -9   3  -1 1794.84 44.4710   3
  -9   3  -1 1881.14 55.4777   4
  -9   3  -1 1868.68 45.0176   3
   9  -3   1 1866.73 44.9985   1
   9  -3   1 1921.44 64.0307   2
 -10   3  -1 718.254 20.6530   3
 -10   3  -1 760.195 31.1249   4
 -10   3  -1 715.195 20.6046   3
  10  -3   1 688.585 36.5827   2
  10  -3   1 714.133 21.7261   1
 -11   3  -1 355.744 21.4279   4
 -11   3  -1 359.770 12.0888   3
 -11   3  -1 341.947 12.1347   3
  11  -3   1 370.944 14.4608   1
  11  -3   1 399.645 27.8818   2
 -12   3  -1 160.174 14.8077   4
  12  -3   1 184.589 9.94922   1
  12  -3   1 171.166 21.8070   2
  12   2  -1 285.572 26.5913   2
  12   2  -1 242.619 14.6392   1
 -12  -2   1 287.359 19.4853   4
  11   2  -1 524.352 34.9987   2
  11   2  -1 502.690 21.3254   1
 -11  -2   1 523.984 26.0261   4
  10   2  -1 902.785 44.7069   2
  10   2  -1 881.136 29.4999   1
  10   2  -1 888.272 24.5520   3
 -10  -2   1 909.535 34.7702   4
 -10  -2   1 879.415 23.9751   3
   9   2  -1 1028.76 27.5196   3
   9   2  -1 1061.90 46.2794   2
   9   2  -1 1029.17 31.2746   1
  -9  -2   1 900.834 48.6412   4
  -9  -2   1 1013.47 27.0026   3
   8   2  -1 524.612 19.0692   1
   8   2  -1 529.764 16.8407   3
   8   2  -1 557.733 30.0502   2
  -8  -2   1 528.111 22.5977   4
  -8  -2   1 532.214 16.5655   3
   7   2  -1 699.831 22.3699   1
   7   2  -1 700.827 20.5103   3
   7   2  -1 712.166 32.8177   2
  -7  -2   1 717.347 26.0225   4
  -7  -2   1 746.065 20.3908   3
   6   2  -1 1369.30 45.9466   2
   6   2  -1 1425.79 35.1505   1
   6   2  -1 1215.20 41.1361   4
  -6  -2   1 1292.62 33.3380   1
  -6  -2   1 1335.81 42.5412   2
  -6  -2   1 1385.93 38.6713   4
   5   2  -1 1228.36 34.8058   4
  -5  -2   1 1217.50 34.6157   4
  -5  -2   1 1235.68 38.1650   2
   4   2  -1 983.924 27.8251   4
  -4  -2   1 980.963 30.4748   2
   3   2  -1 1227.60 37.0723   5
   3   2  -1 1217.21 30.9017   6
  -3  -2   1 1212.64 35.4286   5
  -3  -2   1 1220.35 30.5710   6
   2   2  -1 480.189 13.8986   4
  -2  -2   1 467.708 15.2478   2
   1   2  -1 21.6092 1.94573   3
   1   2  -1 19.2579 1.58007   1
   1   2  -1 24.3412 1.96542   4
   1   2  -1 24.1551 3.07710   2
  -1  -2   1 20.4979 2.13138   2
  -1  -2   1 21.3182 1.60420   1
  -1  -2   1 22.1838 1.84852   4
   0   2  -1 34.3419 1.71109   1
   0   2  -1 33.0090 2.16655   2
   0   2  -1 36.3572 2.05666   4
   0   2  -1 35.8488 2.38600   3
   0  -2   1 35.8184 2.03833   4
   0  -2   1 37.9912 2.48413   3
   0  -2   1 37.5063 2.26831   2
   0  -2   1 39.1309 1.77565   1
  -1   2  -1 79.3162 4.05777   2
  -1   2  -1 89.7339 2.34328   1
  -1   2  -1 85.0109 3.92209   3
  -1   2  -1 87.3374 4.05465   2
  -1   2  -1 84.0908 3.42383   4
   1  -2   1 86.3397 2.32599   1
   1  -2   1 89.5597 3.59824   4
   1  -2   1 84.8989 3.90643   3
  -2   2  -1 466.115 15.0472   2
   2  -2   1 485.615 14.9943   2
  -3   2  -1 212.046 7.50365   3
  -3   2  -1 211.043 8.51262   4
  -3   2  -1 202.092 10.1085   2
  -3   2  -1 210.531 9.23384   4
  -3   2  -1 201.644 5.23311   1
   3  -2   1 210.900 5.58387   1
   3  -2   1 213.282 10.1949   2
   3  -2   1 204.847 7.33813   3
  -4   2  -1 7.57166 2.07665   4
  -4   2  -1 4.55623 1.37233   3
  -4   2  -1 5.68150 2.42401   2
  -4   2  -1 5.48037 0.91695   1
  -4   2  -1 4.28379 1.69598   4
   4  -2   1 5.50323 2.25702   2
   4  -2   1 8.64308 1.87264   3
   4  -2   1 5.73361 1.05990   1
  -5   2  -1 29.7623 3.62960   3
  -5   2  -1 30.2810 1.99333   1
  -5   2  -1 35.3291 4.84028   4
  -5   2  -1 24.9819 3.95640   4
  -5   2  -1 20.0592 4.12342   2
   5  -2   1 28.3896 2.76991   3
   5  -2   1 31.7521 6.39809   2
   5  -2   1 27.4273 2.24216   1
  -6   2  -1 263.880 12.6640   4
  -6   2  -1 245.178 15.1594   2
  -6   2  -1 254.475 9.67156   3
   6  -2   1 268.859 8.97550   1
   6  -2   1 250.191 10.2087   3
   6  -2   1 251.572 15.8268   2
  -7   2  -1 1110.52 35.3480   4
  -7   2  -1 1149.31 29.0979   3
  -7   2  -1 1148.43 34.6658   4
   7  -2   1 1126.99 30.1086   1
   7  -2   1 1113.55 41.1519   2
   7  -2   1 1075.14 28.6194   3
  -8   2  -1 453.451 14.9102   3
  -8   2  -1 451.733 20.6865   4
   8  -2   1 452.420 14.8210   3
   8  -2   1 453.378 25.4398   2
   8  -2   1 478.234 15.2469   1
  -9   2  -1 334.445 18.2912   4
  -9   2  -1 325.496 12.1139   3
   9  -2   1 327.008 22.7932   2
   9  -2   1 334.932 12.9089   1
 -10   2  -1 299.425 11.2125   3
 -10   2  -1 283.303 10.9037   3
 -10   2  -1 297.674 18.2459   4
  10  -2   1 291.687 12.5934   1
  10  -2   1 291.982 22.8713   2
 -11   2  -1 524.883 26.3591   4
 -11   2  -1 494.189 15.5032   3
 -11   2  -1 512.506 15.6305   3
  11  -2   1 530.986 33.2837   2
  11  -2   1 504.922 18.7021   1
 -12   2  -1 564.005 29.6622   4
  12  -2   1 615.216 38.3530   2
  12  -2   1 615.833 21.7130   1
  12   1  -1 20.5705 9.27779   2
  12   1  -1 6.39123 3.34985   1
 -12  -1   1 16.7392 6.10945   4
  11   1  -1 134.195 9.80384   1
  11   1  -1 158.576 24.0326   2
 -11  -1   1 124.534 15.1166   4
  10   1  -1 281.500 13.8248   1
  10   1  -1 274.650 22.9444   2
 -10  -1   1 268.694 17.1446   4
   9   1  -1 513.161 36.4373   2
   9   1  -1 410.039 13.1899   3
   9   1  -1 431.896 17.0598   1
  -9  -1   1 393.034 12.6600   3
  -9  -1   1 444.529 21.3601   4
   8   1  -1 361.153 14.5473   1
   8   1  -1 366.140 11.8817   3
   8   1  -1 403.352 24.6430   2
  -8  -1   1 350.544 11.5440   3
  -8  -1   1 390.017 18.5915   4
   7   1  -1 704.472 25.7883   4
   7   1  -1 705.570 31.7980   2
   7   1  -1 712.795 21.7399   1
   7   1  -1 712.642 19.1745   3
  -7  -1   1 737.252 25.9665   4
  -7  -1   1 704.690 29.5276   2
  -7  -1   1 696.337 18.8103   3
   6   1  -1 336.718 19.2344   2
   6   1  -1 353.365 12.7820   1
   6   1  -1 369.424 11.1529   3
   6   1  -1 317.612 15.2397   4
  -6  -1   1 386.473 16.0451   4
  -6  -1   1 332.264 19.8677   2
  -6  -1   1 334.088 11.7221   1
  -6  -1   1 363.179 10.9633   3
  -5  -1   1 1710.91 48.5118   2
   4   1  -1 1620.91 48.5570   5
   4   1  -1 1636.39 38.0167   6
  -4  -1   1 1606.01 37.7834   6
  -4  -1   1 1650.41 47.3081   5
   3   1  -1 1346.16 30.7303   6
   3   1  -1 1260.32 37.7475   5
  -3  -1   1 1276.56 40.5070   5
  -3  -1   1 1340.99 30.5169   6
   2   1  -1 1212.32 27.9464   6
   2   1  -1 1211.52 32.7245   5
  -2  -1   1 1208.66 27.8294   6
  -2  -1   1 1230.11 32.4811   5
   1   1  -1 3141.10 69.5095   5
   1   1  -1 3199.54 67.7861   6
  -1  -1   1 3119.00 67.7181   6
  -1  -1   1 3254.05 69.4178   5
  -1   1  -1 4619.54 97.0695   5
  -1   1  -1 4655.27 96.7294   6
   1  -1   1 4485.77 96.5586   6
   1  -1   1 4427.85 98.4896   5
  -2   1  -1 816.388 23.2953   5
  -2   1  -1 769.311 20.1790   6
   2  -1   1 810.725 23.3027   5
   2  -1   1 795.348 20.2621   6
  -3   1  -1 3504.40 82.8519   5
  -3   1  -1 3506.63 77.0212   6
   3  -1   1 3494.61 83.3732   5
   3  -1   1 3483.31 76.9093   6
  -4   1  -1 4129.81 100.929   5
  -4   1  -1 4315.82 92.8427   6
   4  -1   1 4190.64 102.265   5
   4  -1   1 4189.42 92.5742   6
  -5   1  -1 3520.08 91.1933   5
  -5   1  -1 3629.29 80.7567   6
   5  -1   1 3569.35 80.5608   6
   5  -1   1 3556.77 93.0142   5
  -6   1  -1 3586.52 95.3353   5
  -6   1  -1 3635.62 81.6698   6
   6  -1   1 3452.42 96.3105   5
  -7   1  -1 451.028 22.7987   2
  -7   1  -1 467.179 19.8682   4
  -7   1  -1 502.375 15.4282   3
  -7   1  -1 492.428 19.7950   4
   7  -1   1 484.503 16.7716   1
   7  -1   1 454.543 15.0344   3
  -8   1  -1 361.519 12.8805   3
  -8   1  -1 366.143 18.1175   4
   8  -1   1 344.090 22.3214   2
   8  -1   1 370.374 13.3722   1
   8  -1   1 327.673 12.4861   3
  -9   1  -1 6.06264 2.12524   3
  -9   1  -1 6.29634 3.04657   4
   9  -1   1 6.09947 4.78652   2
   9  -1   1 1.46724 1.44902   1
   9  -1   1 3.36602 1.44464   3
 -10   1  -1 144.407 12.4520   4
 -10   1  -1 125.539 6.82418   3
  10  -1   1 112.350 6.74858   3
  10  -1   1 120.939 7.99352   1
  10  -1   1 105.152 16.4353   2
 -11   1  -1 160.128 13.9795   4
 -11   1  -1 145.104 7.27202   3
  11  -1   1 177.853 24.5452   2
  11  -1   1 149.130 9.56855   1
 -12   1  -1 78.3218 18.6234   4
  12  -1   1 66.8132 7.84456   1
  12   0  -1 203.409 12.3972   1
  11   0  -1 411.639 17.6202   1
  11   0  -1 387.387 28.8332   2
 -11   0   1 406.310 22.5182   4
  10   0  -1 543.586 32.3166   2
  10   0  -1 510.379 19.5730   1
 -10   0   1 552.913 25.4855   4
   9   0  -1 438.287 27.2279   2
   9   0  -1 453.749 16.9545   1
  -9   0   1 441.534 21.2687   4
   8   0  -1 404.167 15.1090   1
   8   0  -1 406.537 24.4998   2
  -8   0   1 414.363 19.3046   4
  -8   0   1 392.895 11.2557   3
   7   0  -1 49.9823 7.71625   4
   7   0  -1 39.6003 2.69609   3
   7   0  -1 42.9209 5.18305   1
   7   0  -1 33.4748 6.67759   2
  -7   0   1 48.2432 7.18373   4
  -7   0   1 37.1997 2.55322   3
  -7   0   1 44.5368 8.76592   2
   6   0  -1 17.3719 2.17827   3
   6   0  -1 11.4906 3.94248   2
   6   0  -1 12.2990 2.94612   4
   6   0  -1 23.5705 3.62219   1
  -6   0   1 14.6825 2.24264   1
  -6   0   1 17.9517 2.15128   3
  -6   0   1 16.4774 4.99917   2
  -6   0   1 12.5141 3.15949   4
   5   0  -1 314.121 13.5728   4
   5   0  -1 331.034 9.10283   3
   5   0  -1 351.490 11.1912   1
   5   0  -1 319.031 16.9051   2
  -5   0   1 328.848 16.2675   2
  -5   0   1 327.786 8.94443   3
  -5   0   1 324.919 13.6603   4
   4   0  -1 3022.85 65.9017   6
  -4   0   1 3201.64 65.7938   6
  -4   0   1 3007.05 77.3597   5
   3   0  -1 1338.74 28.7508   6
   3   0  -1 1273.72 37.7595   5
  -3   0   1 1335.87 28.6460   6
   2   0  -1 440.983 12.3177   4
  -2   0   1 399.945 13.5991   2
   1   0  -1 5.84283 0.46894   3
   1   0  -1 5.83691 0.90730   4
   1   0  -1 8.47582 1.53247   2
   1   0  -1 9.29082 1.08873   1
  -1   0   1 6.64657 0.77948   1
  -1   0   1 5.29111 0.87338   4
  -1   0   1 9.04014 1.49178   2
   0   0  -1 0.12368 0.11617   4
   0   0   1 0.03922 0.09282   1
  -1   0  -1 2537.42 56.2171   5
  -1   0  -1 2525.96 54.9960   6
   1   0   1 2532.42 55.0301   6
   1   0   1 2502.61 56.2075   5
  -2   0  -1 2251.47 53.1195   5
  -2   0  -1 2212.47 49.8591   6
   2   0   1 2185.60 49.7573   6
   2   0   1 2204.29 53.5938   5
  -3   0  -1 198.027 6.17316   1
  -3   0  -1 211.068 7.38654   3
  -3   0  -1 220.643 8.75366   4
   3   0   1 202.481 8.39578   4
   3   0   1 196.067 7.21538   3
   3   0   1 232.339 10.9373   2
   3   0   1 199.676 6.48817   1
  -4   0  -1 2426.00 55.8365   6
  -4   0  -1 2286.26 63.1188   5
   4   0   1 2456.30 56.1766   6
   4   0   1 2397.12 65.0760   5
  -5   0  -1 805.582 20.7159   1
  -5   0  -1 865.751 26.1833   4
  -5   0  -1 836.401 29.0934   2
   5   0   1 822.875 25.4407   4
   5   0   1 871.627 30.9469   2
   5   0   1 843.420 22.4068   3
  -6   0  -1 1579.53 51.2676   2
   6   0   1 1515.79 42.0271   4
  -7   0  -1 1382.45 40.4617   4
  -7   0  -1 1411.55 41.4327   4
  -7   0  -1 1392.06 46.1779   2
   7   0   1 1422.75 41.0501   4
   7   0   1 1357.68 48.4588   2
   7   0   1 1373.95 35.2123   3
  -8   0  -1 1307.72 41.5693   4
  -8   0  -1 1330.05 34.4273   3
   8   0   1 1350.16 35.4659   1
   8   0   1 1322.75 34.6117   3
   8   0   1 1352.31 50.3990   2
  -9   0  -1 476.102 16.2813   3
  -9   0  -1 513.688 23.3943   4
   9   0   1 461.472 16.4124   3
   9   0   1 476.752 17.6379   1
   9   0   1 640.074 51.1246   2
 -10   0  -1 625.956 27.9285   4
 -10   0  -1 606.869 19.3750   3
  10   0   1 644.291 22.1852   1
  10   0   1 613.680 19.9133   3
  10   0   1 639.583 36.1035   2
 -11   0  -1 359.515 13.5351   3
 -11   0  -1 389.699 22.2966   4
  11   0   1 374.276 14.0530   3
  11   0   1 400.672 17.2553   1
  11   0   1 418.155 30.1912   2
 -12   0  -1 567.669 30.5211   4
  12   0   1 542.057 21.6619   1
  12   0   1 485.553 35.0406   2
  12  -1  -1 261.441 25.2461   2
  12  -1  -1 208.355 12.1214   1
 -12   1   1 267.434 18.6863   4
  11  -1  -1 473.180 19.3366   1
  11  -1  -1 465.843 31.1665   2
 -11   1   1 503.383 25.3164   4
  10  -1  -1 340.823 25.0983   2
  10  -1  -1 371.624 15.1340   1
 -10   1   1 389.353 20.6500   4
   9  -1  -1 557.590 30.6476   2
   9  -1  -1 565.558 19.0102   1
  -9   1   1 556.416 24.4713   4
   8  -1  -1 1502.53 52.6804   2
   8  -1  -1 1536.25 38.5738   1
  -8   1   1 1473.63 44.8891   4
   7  -1  -1 712.691 21.3855   1
   7  -1  -1 788.203 32.4956   2
   7  -1  -1 735.613 26.2269   4
  -7   1   1 695.883 29.9698   2
  -7   1   1 780.721 26.6869   4
   6  -1  -1 3415.50 91.9534   5
  -6   1   1 3247.71 89.4211   5
   5  -1  -1 2875.21 78.4798   5
  -5   1   1 2950.97 78.0960   5
   4  -1  -1 7080.09 161.464   5
   3  -1  -1 9999.99 217.021   5
  -3   1   1 9952.71 216.810   5
   2  -1  -1 1228.63 26.1801   6
   2  -1  -1 1183.84 32.2995   5
  -2   1   1 1186.34 26.1371   6
  -2   1   1 1235.29 32.8441   5
  -1   1   1 1918.55 44.8812   5
  -1   1   1 1955.44 41.9815   6
  -1   1   1 1938.42 45.1838   5
  -1  -1  -1 721.753 18.9170   6
  -1  -1  -1 732.501 20.4879   5
   1   1   1 710.982 20.4799   5
   1   1   1 720.434 18.8784   6
  -2  -1  -1 1441.62 37.3738   5
  -2  -1  -1 1375.65 34.1183   6
   2   1   1 1393.20 34.2692   6
   2   1   1 1411.09 37.8348   5
  -3  -1  -1 393.645 13.0164   4
  -3  -1  -1 369.654 11.8838   3
   3   1   1 406.268 14.1830   4
   3   1   1 379.570 15.7772   2
   3   1   1 389.465 12.0336   3
  -4  -1  -1 1622.04 47.3157   5
  -4  -1  -1 1614.88 40.9474   6
   4   1   1 1639.39 49.4537   5
   4   1   1 1622.11 40.9964   6
  -5  -1  -1 1410.79 42.5435   2
   5   1   1 1466.77 38.6275   4
  -6  -1  -1 502.797 19.4183   4
  -6  -1  -1 491.760 16.1909   3
  -6  -1  -1 469.474 21.9678   2
   6   1   1 477.848 19.0472   4
   6   1   1 546.820 25.5824   2
   6   1   1 512.648 16.0995   1
   6   1   1 505.668 16.5110   3
  -7  -1  -1 781.471 27.8139   4
  -7  -1  -1 800.636 23.3045   3
   7   1   1 807.138 23.5302   3
   7   1   1 785.023 25.3888   1
  -8  -1  -1 38.5095 7.28345   4
  -8  -1  -1 33.3217 4.78907   3
   8   1   1 31.2640 4.96313   3
   8   1   1 27.0732 6.95121   2
   8   1   1 25.4419 4.05808   1
  -9  -1  -1 9.23754 3.90056   4
  -9  -1  -1 9.27986 2.59776   3
   9   1   1 10.5788 3.11655   1
   9   1   1 19.8856 7.86872   2
   9   1   1 5.73940 2.10182   3
 -10  -1  -1 11.6344 4.63787   4
 -10  -1  -1 9.91958 2.82178   3
  10   1   1 15.1542 7.37368   2
  10   1   1 12.0184 3.61037   1
  10   1   1 14.1213 3.46787   3
 -11  -1  -1 6.83775 2.45674   3
 -11  -1  -1 -1.6549 1.36845   4
  11   1   1 5.07869 2.70641   3
  11   1   1 6.68601 4.99635   2
  11   1   1 3.14313 1.99294   1
 -12  -1  -1 46.8640 9.28916   4
  12   1   1 55.8583 14.5651   2
  12   1   1 40.5377 6.67672   1
  13  -2  -1 268.439 25.7874   2
  13  -2  -1 269.389 13.7064   1
 -13   2   1 272.177 20.2859   4
  12  -2  -1 172.243 10.4673   1
  12  -2  -1 199.077 20.7103   2
 -12   2   1 200.413 16.1693   4
  11  -2  -1 103.888 15.6546   2
  11  -2  -1 94.9893 7.47265   1
 -11   2   1 81.7318 11.4894   4
  10  -2  -1 6.24011 4.78870   2
  10  -2  -1 10.4767 2.86309   1
 -10   2   1 10.1065 4.37602   4
   9  -2  -1 136.289 14.4175   2
   9  -2  -1 116.028 7.10542   1
  -9   2   1 119.635 10.5488   4
   8  -2  -1 15.1088 2.98246   1
   8  -2  -1 9.60157 4.28740   2
  -8   2   1 11.0008 3.85054   4
   7  -2  -1 24.6495 5.97143   2
   7  -2  -1 32.4993 5.68388   4
  -7   2   1 28.4930 5.39929   4
  -7   2   1 39.0331 8.77116   2
   6  -2  -1 240.833 15.6286   2
   6  -2  -1 259.652 9.15072   1
   6  -2  -1 260.487 12.7377   4
  -6   2   1 254.740 12.7079   4
  -6   2   1 268.177 16.0303   2
   5  -2  -1 463.094 16.8945   4
   5  -2  -1 496.645 21.1939   2
   5  -2  -1 478.691 13.2349   1
  -5   2   1 482.640 20.9307   2
  -5   2   1 487.962 12.0072   3
  -5   2   1 478.628 17.3476   4
  -5   2   1 478.577 12.9697   1
   4  -2  -1 2472.77 67.3878   5
  -4   2   1 2664.08 55.6324   6
  -4   2   1 2464.83 67.6269   5
  -4   2   1 2627.52 55.9130   6
   3  -2  -1 2528.05 54.8518   6
   3  -2  -1 2507.28 63.5732   5
  -3   2   1 2517.44 54.7974   6
   2  -2  -1 8579.98 188.786   5
  -2   2   1 8753.17 189.072   5
  -2   2   1 8938.62 189.892   5
   1  -2  -1 2682.85 59.2337   6
   1  -2  -1 2701.48 62.4824   5
  -1   2   1 2636.24 62.1182   5
  -1   2   1 2685.62 59.2431   6
   0  -2  -1 674.452 18.5476   6
   0   2   1 667.395 19.9824   5
   0   2   1 673.395 18.6326   6
  -1  -2  -1 133.633 5.82094   3
  -1  -2  -1 139.637 4.54128   1
  -1  -2  -1 135.686 4.64463   4
  -1  -2  -1 143.861 7.09697   2
   1   2   1 135.793 4.59481   1
   1   2   1 128.599 5.80987   3
   1   2   1 144.167 4.67923   4
  -2  -2  -1 1020.38 28.1149   6
   2   2   1 1058.99 28.3301   6
   2   2   1 1050.23 31.7563   5
  -3  -2  -1 3248.96 74.0403   6
  -3  -2  -1 3156.49 78.3256   5
   3   2   1 3163.26 76.7983   6
   3   2   1 3192.14 80.3707   5
  -4  -2  -1 2301.43 56.6432   6
  -4  -2  -1 2351.66 62.9521   5
   4   2   1 2309.88 65.8424   5
   4   2   1 2265.57 56.6722   6
  -5  -2  -1 1401.39 42.8112   2
   5   2   1 1482.57 38.9413   4
   5   2   1 1450.73 46.1691   2
  -6  -2  -1 2426.81 66.9837   2
   6   2   1 2462.02 58.6509   3
  -7  -2  -1 2014.21 54.9578   4
   7   2   1 2001.28 50.3281   3
   7   2   1 2053.21 65.6323   2
  -8  -2  -1 1701.48 44.2378   3
  -8  -2  -1 1733.76 50.3544   4
   8   2   1 1680.31 44.4870   3
   8   2   1 1710.80 61.2396   2
   8   2   1 1739.37 45.1014   1
  -9  -2  -1 847.789 25.9419   3
  -9  -2  -1 890.271 37.9319   4
   9   2   1 886.477 42.8077   2
   9   2   1 792.432 26.0708   3
   9   2   1 829.302 27.0574   1
 -10  -2  -1 519.983 18.8452   3
 -10  -2  -1 537.936 25.4525   4
  10   2   1 528.480 34.0652   2
  10   2   1 532.822 21.0095   1
 -11  -2  -1 396.687 15.5732   3
 -11  -2  -1 410.176 22.9547   4
  11   2   1 351.620 29.3549   2
  11   2   1 405.152 18.4987   1
 -12  -2  -1 277.680 19.4996   4
  12   2   1 242.527 14.8775   1
  12   2   1 282.933 27.2473   2
  13  -3  -1 239.385 23.9591   2
  13  -3  -1 285.498 13.2650   1
 -13   3   1 285.406 20.3591   4
  12  -3  -1 594.145 36.3474   2
  12  -3  -1 564.491 19.6689   1
 -12   3   1 541.289 27.9695   4
  11  -3  -1 622.902 20.9600   1
  11  -3  -1 623.947 35.8745   2
 -11   3   1 611.431 28.4847   4
  10  -3  -1 1089.28 29.8569   1
  10  -3  -1 1055.98 46.5028   2
 -10   3   1 1108.62 39.1636   4
   9  -3  -1 1156.21 29.6894   1
   9  -3  -1 1140.57 45.7042   2
  -9   3   1 1017.59 36.8361   4
   8  -3  -1 872.452 23.6317   1
   8  -3  -1 921.785 37.7942   2
  -8   3   1 848.685 30.6208   4
   7  -3  -1 510.622 24.9021   2
   7  -3  -1 461.460 14.9160   1
   7  -3  -1 446.817 18.6977   4
  -7   3   1 470.374 24.1268   2
  -7   3   1 477.284 19.7041   4
   6  -3  -1 567.625 24.9577   2
   6  -3  -1 555.746 15.2115   1
   6  -3  -1 532.696 19.7737   4
  -6   3   1 570.416 20.7289   4
  -6   3   1 607.976 14.8475   3
  -6   3   1 568.043 14.8594   3
   5  -3  -1 2811.25 77.5103   5
  -5   3   1 2942.77 64.1127   6
  -5   3   1 2790.09 78.1106   5
  -5   3   1 2883.74 63.4932   6
   4  -3  -1 948.477 26.0079   4
   4  -3  -1 952.031 30.6063   2
  -4   3   1 974.402 31.5077   2
   3  -3  -1 1610.08 45.0729   5
   3  -3  -1 1585.16 38.2041   6
  -3   3   1 1617.90 38.1751   6
  -3   3   1 1622.35 46.0756   5
   2  -3  -1 5379.57 115.772   6
  -2   3   1 5374.26 115.820   6
  -2   3   1 5421.51 121.878   5
  -2   3   1 5234.23 120.640   5
   1  -3  -1 90.5172 4.69786   3
   1  -3  -1 94.3531 6.02720   2
  -1   3   1 101.552 6.17597   2
  -1   3   1 87.7652 4.66007   3
  -1   3   1 87.6653 3.03591   1
  -1   3   1 90.9820 2.88792   4
  -1   3   1 92.2039 2.99527   4
   0  -3  -1 183.530 8.72593   2
   0  -3  -1 185.978 7.47567   3
   0   3   1 177.764 8.58633   2
   0   3   1 171.173 5.39767   1
   0   3   1 175.156 7.36235   3
  -1  -3  -1 149.552 5.00477   4
  -1  -3  -1 145.304 6.90184   3
  -1  -3  -1 150.236 5.24272   1
   1   3   1 156.485 5.14623   4
   1   3   1 161.955 8.62006   2
   1   3   1 165.932 5.57564   1
  -2  -3  -1 1577.72 40.5989   6
  -2  -3  -1 1534.62 43.3210   5
   2   3   1 1528.65 40.5928   6
  -3  -3  -1 1677.92 43.6809   6
  -3  -3  -1 1639.00 47.4714   5
   3   3   1 1654.78 49.5791   5
   3   3   1 1652.23 43.8787   6
  -4  -3  -1 2.82970 1.23435   1
  -4  -3  -1 1.20438 1.49813   2
  -4  -3  -1 3.87227 1.57343   3
  -4  -3  -1 3.08375 1.61846   4
   4   3   1 0.75251 0.88887   3
   4   3   1 19.0339 3.66423   4
   4   3   1 3.10355 1.22793   1
  -5  -3  -1 30.4114 4.25064   3
  -5  -3  -1 29.2119 3.72542   1
  -5  -3  -1 32.0957 5.37126   4
  -5  -3  -1 29.4681 7.10384   2
   5   3   1 43.8271 5.11102   1
   5   3   1 21.5573 5.17056   2
   5   3   1 33.5470 5.25022   4
   5   3   1 37.0167 5.30604   3
  -6  -3  -1 28.4588 5.01241   4
   6   3   1 43.0383 5.74095   1
   6   3   1 32.4435 4.99767   3
   6   3   1 47.5929 7.04402   4
   6   3   1 25.5410 6.02239   2
  -7  -3  -1 343.443 16.7125   4
  -7  -3  -1 388.303 15.2271   3
   7   3   1 325.233 22.3442   2
   7   3   1 344.102 14.8637   3
   7   3   1 351.572 14.5085   1
  -8  -3  -1 30.4933 6.60788   4
  -8  -3  -1 27.0875 4.86301   3
   8   3   1 38.7520 6.16319   1
   8   3   1 22.6355 8.27877   2
  -9  -3  -1 76.1809 10.5636   4
  -9  -3  -1 70.2975 6.34757   3
   9   3   1 84.0081 9.33183   1
   9   3   1 73.9787 6.70217   3
   9   3   1 52.6697 11.7652   2
 -10  -3  -1 223.203 15.6605   4
 -10  -3  -1 221.314 11.7547   3
  10   3   1 233.330 13.3240   1
  10   3   1 258.540 23.8358   2
  10   3   1 223.061 12.3757   3
 -11  -3  -1 378.215 16.1437   3
 -11  -3  -1 404.262 22.7933   4
  11   3   1 401.693 18.9527   1
  11   3   1 364.922 34.3636   2
  13  -4  -1 20.6396 3.81779   1
  13  -4  -1 13.1193 6.32694   2
 -13   4   1 17.5106 5.66626   4
  12  -4  -1 2.44082 1.69356   1
  12  -4  -1 -0.8313 1.89563   2
 -12   4   1 2.28892 2.71781   4
  11  -4  -1 86.4011 16.1302   2
  11  -4  -1 75.0488 5.50347   1
 -11   4   1 70.2581 10.5856   4
  10  -4  -1 172.951 16.7375   2
  10  -4  -1 145.066 7.39563   1
 -10   4   1 134.981 11.9634   4
   9  -4  -1 10.2581 5.05616   2
   9  -4  -1 15.7650 2.73138   1
  -9   4   1 25.6113 6.28812   4
   8  -4  -1 245.877 8.98839   1
   8  -4  -1 227.156 17.3441   2
  -8   4   1 256.072 8.43391   3
  -8   4   1 282.836 15.3333   4
  -8   4   1 253.356 8.19308   3
   7  -4  -1 57.0084 3.54450   1
   7  -4  -1 51.7477 8.25017   2
   7  -4  -1 71.7067 8.45924   4
  -7   4   1 81.6421 12.8234   2
  -7   4   1 73.0264 8.88865   4
  -7   4   1 70.8161 3.94591   3
  -7   4   1 72.2012 4.10990   3
   6  -4  -1 92.6063 7.02292   4
   6  -4  -1 92.7529 9.31612   2
   6  -4  -1 95.5175 4.11034   1
  -6   4   1 95.7173 4.81080   3
  -6   4   1 83.3885 4.75248   3
  -6   4   1 100.402 7.51663   4
   5  -4  -1 949.168 27.4146   4
  -5   4   1 919.899 22.0013   1
  -5   4   1 1023.67 34.4958   2
   4  -4  -1 1086.68 28.5095   4
  -4   4   1 1102.78 35.2956   2
  -4   4   1 1070.86 24.3591   1
   3  -4  -1 4054.16 90.3866   6
  -3   4   1 4003.79 90.3129   6
  -3   4   1 3999.56 97.3188   5
  -3   4   1 4064.41 98.8145   5
   2  -4  -1 4862.87 113.185   5
   2  -4  -1 4871.84 107.546   6
  -2   4   1 4785.95 111.962   5
   1  -4  -1 3952.78 92.4765   5
   1  -4  -1 3786.20 88.1953   6
  -1   4   1 3941.77 91.8887   5
  -1   4   1 3861.98 88.4598   6
   0  -4  -1 2883.66 69.2461   6
   0  -4  -1 2943.75 72.1623   5
   0   4   1 2964.11 72.2391   5
   0   4   1 2890.37 69.1895   6
  -1  -4  -1 1082.22 29.3229   3
  -1  -4  -1 1122.89 31.9834   2
  -2  -4  -1 2189.72 59.3498   5
  -2  -4  -1 2214.11 55.9161   6
   2   4   1 2203.36 56.1418   6
   2   4   1 2194.48 60.6792   5
  -3  -4  -1 1922.15 55.9076   5
  -3  -4  -1 2007.39 52.3134   6
   3   4   1 1981.83 52.5975   6
   3   4   1 2014.33 59.0379   5
  -4  -4  -1 813.653 23.8563   4
  -4  -4  -1 773.353 28.4100   2
  -4  -4  -1 851.824 25.1704   3
   4   4   1 787.208 23.8452   4
   4   4   1 808.640 25.1294   3
   4   4   1 820.897 22.8628   1
   4   4   1 818.942 31.3392   2
  -5  -4  -1 1078.57 30.9434   3
  -5  -4  -1 1064.50 27.5583   1
  -5  -4  -1 1010.26 33.3210   4
  -5  -4  -1 1013.28 35.8568   2
   5   4   1 1076.11 31.3160   3
   5   4   1 1057.48 30.8815   4
   5   4   1 1044.63 39.3569   2
   5   4   1 1085.52 29.2409   1
  -6  -4  -1 739.165 25.0136   4
  -6  -4  -1 698.088 23.6931   3
   6   4   1 742.203 24.5278   3
   6   4   1 765.139 34.3092   2
   6   4   1 729.668 22.9047   1
   6   4   1 686.262 24.4915   4
  -7  -4  -1 456.066 18.0230   3
  -7  -4  -1 457.487 19.6164   4
   7   4   1 467.282 27.5368   2
   7   4   1 433.958 18.1495   3
   7   4   1 448.992 17.4024   1
  -8  -4  -1 956.872 29.9558   3
  -8  -4  -1 1005.09 33.5780   4
   8   4   1 899.312 29.4451   1
   8   4   1 912.192 30.3018   3
  -9  -4  -1 290.042 17.2700   4
  -9  -4  -1 294.308 14.4378   3
   9   4   1 326.104 25.7816   2
   9   4   1 315.237 15.3953   1
 -10  -4  -1 121.855 14.1860   4
 -10  -4  -1 96.1626 8.01251   3
  10   4   1 124.313 21.8713   2
  10   4   1 101.505 9.00484   1
 -11  -4  -1 198.864 15.5062   4
 -11  -4  -1 188.291 11.3056   3
  11   4   1 214.216 13.7336   1
  12  -5  -1 412.545 14.0371   1
  12  -5  -1 394.870 29.1971   2
 -12   5   1 418.961 23.8970   4
  11  -5  -1 467.060 14.7904   1
  11  -5  -1 462.539 29.9589   2
 -11   5   1 464.376 24.3003   4
  10  -5  -1 467.240 14.4154   1
  10  -5  -1 451.212 28.1841   2
 -10   5   1 531.403 24.5219   4
   9  -5  -1 577.586 16.1249   1
   9  -5  -1 573.045 30.4372   2
  -9   5   1 600.245 25.4455   4
  -9   5   1 596.815 16.2113   3
   8  -5  -1 1126.89 27.0797   1
   8  -5  -1 1148.50 43.7419   2
  -8   5   1 1141.86 28.5500   3
  -8   5   1 1178.74 37.4404   4
  -8   5   1 1152.97 28.9230   3
   7  -5  -1 1283.97 45.1034   2
  -7   5   1 1250.99 37.7195   4
  -7   5   1 1326.30 38.9799   4
  -7   5   1 1336.38 32.9199   3
  -6   5   1 2063.57 63.5650   2
  -6   5   1 2259.10 55.1084   4
  -5   5   1 1670.85 36.9954   1
  -5   5   1 1734.52 52.4088   2
   4  -5  -1 103.723 5.96512   3
  -4   5   1 111.664 6.43005   4
  -4   5   1 109.564 3.86172   1
  -4   5   1 104.471 6.02477   3
  -4   5   1 96.6291 8.84434   2
  -4   5   1 112.771 6.15245   4
   3  -5  -1 181.380 8.35402   3
  -3   5   1 192.703 7.28969   4
  -3   5   1 186.272 8.54018   3
  -3   5   1 187.726 5.23030   1
  -3   5   1 181.657 11.5160   2
  -3   5   1 183.724 10.9492   2
  -3   5   1 190.144 7.68926   4
   2  -5  -1 445.425 15.3617   3
  -2   5   1 467.528 12.5330   4
  -2   5   1 460.143 11.9283   4
  -2   5   1 468.550 11.5242   1
  -2   5   1 487.958 18.5483   2
  -2   5   1 475.253 15.6879   3
   1  -5  -1 3.55143 1.41631   3
   1  -5  -1 6.39293 2.50080   2
  -1   5   1 7.52754 2.50757   2
  -1   5   1 2.81550 0.78081   1
  -1   5   1 2.92049 1.23857   3
   0  -5  -1 33.6165 4.60145   3
   0  -5  -1 50.4692 6.94584   2
   0   5   1 43.3799 5.59169   3
   0   5   1 45.0894 6.51454   2
   0   5   1 41.6504 2.72883   1
  -1  -5  -1 397.384 11.5350   1
  -1  -5  -1 386.784 10.2649   4
  -1  -5  -1 405.341 17.1750   2
  -1  -5  -1 399.070 14.9386   3
   1   5   1 405.402 10.7397   4
   1   5   1 394.914 12.0163   1
   1   5   1 424.723 17.8111   2
   1   5   1 411.954 15.3701   3
  -2  -5  -1 3.28403 1.88524   2
  -2  -5  -1 2.64690 1.04581   4
  -2  -5  -1 3.54939 1.80210   3
  -2  -5  -1 2.97084 1.02542   1
   2   5   1 13.7953 3.85020   2
   2   5   1 3.64830 1.20730   4
   2   5   1 2.60979 1.07794   1
   2   5   1 1.58987 1.17454   3
  -3  -5  -1 138.974 6.79232   4
  -3  -5  -1 134.511 10.1793   2
  -3  -5  -1 145.602 8.74384   3
  -3  -5  -1 139.147 6.37087   1
   3   5   1 134.564 6.95497   4
   3   5   1 124.077 10.4944   2
   3   5   1 132.302 8.52001   3
   3   5   1 137.406 6.97055   1
  -4  -5  -1 56.2901 8.52658   2
  -4  -5  -1 59.5880 4.98915   4
  -4  -5  -1 59.5352 5.73272   3
  -4  -5  -1 62.1498 4.35584   1
   4   5   1 68.5611 5.11119   1
   4   5   1 71.0401 5.45781   4
   4   5   1 74.0061 11.4029   2
   4   5   1 62.0952 5.93756   3
  -5  -5  -1 110.978 6.35382   1
  -5  -5  -1 126.943 8.10681   4
  -5  -5  -1 119.820 8.47467   3
   5   5   1 135.585 8.37173   4
   5   5   1 122.433 7.49949   1
   5   5   1 88.2394 11.5124   2
   5   5   1 122.043 8.70712   3
  -6  -5  -1 796.050 26.4332   4
  -6  -5  -1 778.403 26.3747   3
   6   5   1 791.767 36.2113   2
   6   5   1 798.192 26.8243   4
   6   5   1 755.651 26.7234   3
   6   5   1 819.049 25.1997   1
  -7  -5  -1 108.574 8.85839   4
  -7  -5  -1 103.592 8.34505   3
   7   5   1 73.5446 15.0915   2
   7   5   1 114.980 8.24724   1
  -8  -5  -1 67.5132 6.85321   3
  -8  -5  -1 66.9136 9.15077   4
   8   5   1 71.1290 8.67671   1
   8   5   1 43.3881 10.5092   2
  -9  -5  -1 375.085 17.3021   3
  -9  -5  -1 344.274 18.8460   4
   9   5   1 350.336 17.1196   1
   9   5   1 386.835 29.1184   2
 -10  -5  -1 446.585 19.6149   3
 -10  -5  -1 478.047 23.5121   4
  10   5   1 431.247 39.5563   2
  12  -6  -1 137.085 6.29784   1
  12  -6  -1 178.370 34.7379   2
 -12   6   1 144.882 13.6878   4
  11  -6  -1 404.804 27.8532   2
  11  -6  -1 403.200 12.1525   1
 -11   6   1 396.150 22.2072   4
  10  -6  -1 313.122 22.9075   2
  10  -6  -1 323.633 9.84394   1
 -10   6   1 301.232 18.1972   4
   9  -6  -1 220.971 7.10707   1
  -9   6   1 214.810 14.2944   4
  -9   6   1 210.398 9.02906   3
  -9   6   1 208.903 8.71279   3
   8  -6  -1 1142.48 25.8829   1
   8  -6  -1 1149.34 43.8294   2
  -8   6   1 1138.46 36.9780   4
  -8   6   1 1145.85 30.5091   3
  -8   6   1 1129.73 29.8646   3
  -7   6   1 1268.13 37.6642   4
  -7   6   1 1344.79 46.5132   2
  -7   6   1 1361.14 35.1337   3
  -7   6   1 1303.30 34.0862   3
  -7   6   1 1346.37 39.3945   4
  -6   6   1 1780.58 46.1803   4
  -6   6   1 1740.26 56.5388   2
  -6   6   1 1802.22 54.7346   2
  -4   6   1 2555.41 69.7827   2
   3  -6  -1 3855.47 89.1237   6
  -3   6   1 3658.29 94.3134   5
  -3   6   1 3666.62 96.6291   5
  -3   6   1 3774.61 89.1313   6
  -2   6   1 1325.91 38.7472   2
  -2   6   1 1271.16 34.7618   3
   1  -6  -1 3065.45 80.3503   5
   1  -6  -1 3190.09 76.7180   6
  -1   6   1 2953.53 79.0418   5
  -1   6   1 3144.76 76.7966   6
   0  -6  -1 1760.10 57.5783   6
   0  -6  -1 1856.60 53.7227   5
   0   6   1 1848.63 53.8221   5
   0   6   1 1837.07 50.6908   6
  -1  -6  -1 1169.59 36.0705   2
   1   6   1 1105.86 32.8260   3
  -2  -6  -1 587.597 23.4712   2
  -2  -6  -1 590.297 15.7586   4
  -2  -6  -1 582.335 20.7621   3
  -2  -6  -1 565.761 16.5194   1
   2   6   1 558.763 20.8690   3
   2   6   1 625.181 25.1778   2
   2   6   1 591.886 17.5435   1
   2   6   1 587.781 16.3689   4
  -3  -6  -1 779.628 21.9047   1
  -3  -6  -1 764.029 29.2977   2
  -3  -6  -1 833.341 22.3527   4
  -3  -6  -1 839.558 26.7990   3
   3   6   1 807.385 27.0285   3
   3   6   1 850.193 23.5775   1
   3   6   1 810.507 22.7834   4
  -4  -6  -1 849.163 27.7975   3
  -4  -6  -1 865.875 24.4441   4
   4   6   1 813.263 24.7608   4
   4   6   1 845.130 28.2651   3
   4   6   1 847.628 24.9776   1
   4   6   1 822.373 34.0380   2
  -5  -6  -1 803.355 24.8324   4
  -5  -6  -1 737.399 22.4757   1
  -5  -6  -1 792.744 26.9949   3
   5   6   1 811.180 24.9701   1
   5   6   1 783.182 25.2170   4
   5   6   1 828.963 35.9021   2
  -6  -6  -1 389.316 17.4305   3
  -6  -6  -1 360.785 15.9340   4
   6   6   1 380.086 24.7414   2
   6   6   1 342.637 16.1617   4
   6   6   1 374.101 15.7820   1
  -7  -6  -1 276.640 14.4327   4
  -7  -6  -1 257.617 14.2886   3
   7   6   1 262.045 13.4961   1
   7   6   1 259.275 21.5385   2
  -8  -6  -1 91.6468 8.44973   3
  -8  -6  -1 93.0258 8.70423   4
   8   6   1 106.880 18.8910   2
   8   6   1 79.1569 8.96922   1
  -9  -6  -1 231.178 14.9423   4
   9   6   1 225.708 13.7940   1
   9   6   1 252.727 24.0484   2
 -10  -6  -1 17.4995 5.52253   4
 -10  -6  -1 10.6319 3.84598   3
  10   6   1 13.5377 6.25154   2
  10   6   1 9.30364 3.69647   1
  12  -7  -1 299.579 26.0585   2
 -12   7   1 264.635 18.8216   4
  11  -7  -1 407.602 27.8049   2
 -11   7   1 410.884 22.6126   4
  10  -7  -1 138.916 19.0391   2
 -10   7   1 138.284 7.08947   3
 -10   7   1 135.132 18.5743   2
 -10   7   1 143.055 12.2900   4
 -10   7   1 148.176 7.51318   3
  -9   7   1 107.856 9.92462   4
  -9   7   1 108.740 16.5041   2
  -9   7   1 93.0980 6.48217   3
  -9   7   1 96.2730 6.18811   3
  -8   7   1 5.06030 2.90725   2
  -8   7   1 3.96533 2.71151   4
  -8   7   1 1.35492 1.59948   3
  -8   7   1 1.80099 1.40713   3
  -7   7   1 584.961 20.1734   3
  -7   7   1 554.832 19.1093   3
  -7   7   1 563.569 20.8846   4
  -7   7   1 589.281 22.3229   4
  -7   7   1 573.834 27.8807   2
   6  -7  -1 241.285 11.3522   3
  -6   7   1 236.964 16.2841   2
  -6   7   1 259.865 12.6612   4
  -6   7   1 238.127 11.3589   3
  -6   7   1 256.808 11.7124   4
   5  -7  -1 3.15200 2.16691   3
  -5   7   1 10.1365 2.73141   3
  -5   7   1 2.51999 1.37046   4
  -5   7   1 1.70419 0.48330   1
  -5   7   1 1.20103 2.20491   2
  -5   7   1 2.88760 1.60838   4
  -5   7   1 0.71052 1.39499   2
   4  -7  -1 -0.2072 1.11053   3
  -4   7   1 0.83024 1.23912   3
  -4   7   1 3.53276 2.49943   2
  -4   7   1 3.51562 1.56109   4
  -4   7   1 1.85362 0.59355   1
   3  -7  -1 212.633 10.7962   3
   3  -7  -1 228.718 14.3132   2
  -3   7   1 204.750 13.1173   2
  -3   7   1 221.599 8.28852   4
  -3   7   1 206.805 10.8637   3
  -3   7   1 222.143 7.50314   4
  -3   7   1 214.211 6.71425   1
   2  -7  -1 458.159 20.9001   2
   2  -7  -1 475.716 17.9242   3
  -2   7   1 476.277 17.8996   3
  -2   7   1 459.662 20.2874   2
  -2   7   1 454.045 12.6526   1
  -2   7   1 475.285 12.1569   4
  -2   7   1 461.630 11.6602   4
   1  -7  -1 3.02487 2.45894   2
   1  -7  -1 5.09331 1.94334   3
  -1   7   1 -0.0155 1.24689   2
  -1   7   1 5.33969 2.24964   3
  -1   7   1 2.39525 0.99142   1
   0  -7  -1 71.3074 6.48388   3
   0  -7  -1 101.849 8.88775   2
   0  -7  -1 74.0998 4.03903   1
   0   7   1 76.0667 7.87431   2
   0   7   1 77.0186 4.54178   1
   0   7   1 72.2521 8.65311   3
  -1  -7  -1 493.241 14.5049   1
  -1  -7  -1 520.648 12.3250   4
  -1  -7  -1 473.774 24.1619   2
  -1  -7  -1 499.694 19.5388   3
   1   7   1 516.044 22.6451   2
   1   7   1 485.662 19.6408   3
   1   7   1 506.898 15.5870   1
   1   7   1 491.851 12.6454   4
  -2  -7  -1 1096.25 37.5708   2
  -2  -7  -1 1122.87 34.3097   3
  -2  -7  -1 1146.10 30.2145   1
  -2  -7  -1 1158.76 27.1024   4
   2   7   1 1102.13 34.7141   3
   2   7   1 1160.82 39.6323   2
   2   7   1 1122.60 29.9391   1
   2   7   1 1137.06 27.8168   4
  -3  -7  -1 1388.20 39.9838   3
  -3  -7  -1 1314.26 50.2212   2
  -3  -7  -1 1356.22 33.3406   4
   3   7   1 1344.49 46.0687   2
   3   7   1 1333.65 34.1176   4
   3   7   1 1371.69 35.7357   1
  -4  -7  -1 146.140 10.2691   3
  -4  -7  -1 151.926 7.88695   4
  -4  -7  -1 137.863 7.42588   1
   4   7   1 140.370 8.40726   1
   4   7   1 139.398 8.00612   4
   4   7   1 142.150 13.3672   2
  -5  -7  -1 603.463 20.6769   4
  -5  -7  -1 638.645 24.2264   3
   5   7   1 639.700 21.8060   1
   5   7   1 611.418 21.5750   4
   5   7   1 612.926 31.4643   2
  -6  -7  -1 773.800 25.7190   4
  -6  -7  -1 787.441 28.5423   3
   6   7   1 793.903 38.5054   2
   6   7   1 794.262 26.2237   1
   6   7   1 739.694 26.3645   4
  -7  -7  -1 839.015 30.1165   3
  -7  -7  -1 842.659 28.3243   4
   7   7   1 789.464 41.1661   2
   7   7   1 769.279 27.5337   1
  -8  -7  -1 677.784 26.8817   3
  -8  -7  -1 658.763 28.8178   4
   8   7   1 703.129 26.2345   1
   8   7   1 690.303 39.7459   2
  -9  -7  -1 457.605 21.7170   3
  -9  -7  -1 480.972 22.2176   4
   9   7   1 484.504 21.7100   1
 -12   8   1 381.484 23.3034   4
 -12   8   1 409.450 29.4499   2
 -11   8   1 248.049 10.2295   3
 -11   8   1 262.590 17.6063   4
 -11   8   1 265.271 22.5124   2
 -10   8   1 450.121 16.3876   3
 -10   8   1 506.688 30.1978   2
 -10   8   1 461.385 23.0490   4
 -10   8   1 465.758 19.8400   3
  -9   8   1 867.694 32.4166   4
  -9   8   1 884.433 40.0548   2
  -9   8   1 900.748 27.6802   3
  -9   8   1 863.779 26.4952   3
  -8   8   1 678.026 25.8586   4
  -8   8   1 620.632 21.7344   3
  -8   8   1 664.152 22.9994   3
  -8   8   1 657.367 35.5670   2
   7  -8  -1 1169.47 33.9790   3
  -7   8   1 1210.66 36.3733   4
  -7   8   1 1126.17 33.6638   3
  -7   8   1 1224.03 44.5426   2
  -7   8   1 1155.37 34.0433   4
   6  -8  -1 1193.69 34.7068   3
  -6   8   1 1195.93 33.2956   4
  -6   8   1 1292.24 35.5775   4
  -6   8   1 1241.97 43.5039   2
  -6   8   1 1155.90 34.7788   3
  -5   8   1 2108.85 61.6703   2
  -5   8   1 2129.93 50.2196   4
  -5   8   1 2074.39 44.9140   1
   4  -8  -1 444.130 17.6759   3
  -4   8   1 417.350 22.5363   2
  -4   8   1 460.269 13.6179   4
  -4   8   1 412.330 17.5153   3
  -4   8   1 446.097 14.7092   4
  -4   8   1 441.779 21.4371   2
  -4   8   1 443.281 11.4852   1
  -3   8   1 1999.91 53.7091   3
  -3   8   1 2133.90 59.1263   2
   2  -8  -1 1684.92 45.5550   3
   2  -8  -1 1573.48 49.8985   2
  -2   8   1 1684.11 38.1388   1
  -2   8   1 1668.65 49.7603   2
  -2   8   1 1627.23 45.4592   3
   1  -8  -1 1648.20 50.8640   2
  -1   8   1 1629.68 46.9320   3
  -1   8   1 1786.16 51.5378   2
  -1   8   1 1800.61 40.5951   1
   0  -8  -1 589.696 22.5286   3
   0  -8  -1 618.278 16.6036   1
   0  -8  -1 566.649 24.7322   2
   0   8   1 605.168 17.5563   1
   0   8   1 572.487 22.5092   3
   0   8   1 568.543 24.9753   2
  -1  -8  -1 1061.68 33.5536   3
  -1  -8  -1 1017.43 36.3350   2
  -1  -8  -1 1045.70 26.8373   1
   1   8   1 1067.19 37.7086   2
   1   8   1 1070.87 28.3288   1
  -2  -8  -1 552.862 22.4328   3
  -2  -8  -1 563.330 14.8818   4
   2   8   1 567.503 15.6574   4
   2   8   1 554.658 18.3411   1
   2   8   1 562.831 26.4818   2
  -3  -8  -1 217.694 9.68666   1
  -3  -8  -1 252.263 14.2192   3
  -3  -8  -1 238.416 8.98818   4
   3   8   1 232.385 11.0772   1
   3   8   1 263.188 18.0239   2
   3   8   1 232.987 9.70890   4
  -4  -8  -1 5.97930 1.94007   4
  -4  -8  -1 2.65478 2.36254   3
  -4  -8  -1 2.72797 1.45848   1
   4   8   1 6.64171 3.94778   2
   4   8   1 3.64365 1.57289   4
   4   8   1 0.74488 1.36046   1
  -5  -8  -1 9.10087 2.70298   4
  -5  -8  -1 7.88961 2.51471   4
  -5  -8  -1 12.3011 3.22292   1
  -5  -8  -1 5.40969 2.98532   3
   5   8   1 5.17063 4.07643   2
   5   8   1 8.23730 3.03521   1
  -6  -8  -1 20.7212 5.17198   3
  -6  -8  -1 18.6849 4.13526   4
  -6  -8  -1 19.7952 4.31244   4
   6   8   1 16.1227 3.72203   1
   6   8   1 22.0953 7.89195   2
  -7  -8  -1 2.81666 2.56219   3
  -7  -8  -1 6.64445 2.95126   4
   7   8   1 3.72131 3.56617   2
   7   8   1 6.86867 3.11118   1
  -8  -8  -1 -1.4747 0.85766   3
  -8  -8  -1 0.13869 1.38449   4
   8   8   1 1.28339 2.18468   1
   8   8   1 0.33320 2.24937   2
 -11   9   1 20.0888 8.14303   2
 -11   9   1 25.4374 6.22594   4
 -11   9   1 27.6179 4.52984   3
 -10   9   1 27.9488 9.12652   2
 -10   9   1 32.0744 7.08075   4
 -10   9   1 27.7228 5.23072   3
  -9   9   1 2.77169 1.74317   3
  -9   9   1 -0.2998 1.28376   4
  -9   9   1 -1.2283 1.02312   3
  -9   9   1 4.18910 3.75979   2
  -8   9   1 4.29020 2.23569   3
  -8   9   1 4.10799 3.45592   2
  -8   9   1 15.6101 4.33066   3
  -8   9   1 6.17783 2.91783   4
   7  -9  -1 13.0839 3.57708   3
  -7   9   1 24.2121 4.45165   4
  -7   9   1 15.7594 3.76821   3
  -7   9   1 26.0562 7.69802   2
  -7   9   1 19.9787 4.64180   4
   6  -9  -1 20.9023 4.78927   3
  -6   9   1 16.8770 4.28435   3
  -6   9   1 19.6138 6.64782   2
  -6   9   1 17.5500 3.65606   4
  -6   9   1 15.3343 3.93761   4
   5  -9  -1 74.9239 7.12030   3
  -5   9   1 85.8710 7.57998   3
  -5   9   1 80.8788 5.22737   4
  -5   9   1 84.9692 12.8281   2
  -5   9   1 90.1344 6.30184   4
   4  -9  -1 316.132 15.2848   3
  -4   9   1 315.890 9.31476   1
  -4   9   1 290.153 17.6901   2
  -4   9   1 320.005 10.5291   4
  -4   9   1 319.002 11.5029   4
   3  -9  -1 1014.75 32.8625   3
  -3   9   1 1064.10 24.9974   4
  -3   9   1 1031.46 25.1846   1
  -3   9   1 1016.67 24.2102   4
  -3   9   1 1011.83 36.8426   2
   2  -9  -1 1345.80 46.0518   2
   2  -9  -1 1316.29 39.5179   3
  -2   9   1 1281.30 31.7513   1
  -2   9   1 1316.00 43.4570   2
   1  -9  -1 1118.99 44.9758   2
   1  -9  -1 1045.60 34.1856   3
  -1   9   1 1056.62 28.4677   1
  -1   9   1 1043.29 37.6984   2
   0  -9  -1 953.587 24.5849   1
   0  -9  -1 942.378 32.0177   3
   0   9   1 930.460 25.8675   1
   0   9   1 982.454 36.2856   2
  -1  -9  -1 1839.87 45.5670   1
  -1  -9  -1 2017.95 54.9857   3
   1   9   1 2001.79 60.0015   2
   1   9   1 1940.81 47.7658   1
  -2  -9  -1 632.181 25.2943   3
  -2  -9  -1 646.765 15.5809   4
  -2  -9  -1 584.048 18.7315   1
  -2  -9  -1 628.581 15.8595   4
   2   9   1 648.210 20.8210   1
   2   9   1 602.125 28.9873   2
  -3  -9  -1 751.466 28.3211   3
  -3  -9  -1 728.798 21.8602   1
  -3  -9  -1 734.935 19.7348   4
  -3  -9  -1 727.527 20.2681   4
   3   9   1 787.531 34.6007   2
   3   9   1 720.014 23.8962   1
  -4  -9  -1 596.375 25.2835   3
  -4  -9  -1 629.294 18.7184   4
  -4  -9  -1 612.912 19.2504   4
  -4  -9  -1 600.048 19.8270   1
   4   9   1 634.857 36.9337   2
   4   9   1 626.635 22.2096   1
  -5  -9  -1 602.280 20.4743   4
  -5  -9  -1 570.792 25.4247   3
  -5  -9  -1 607.480 19.9298   4
  -5  -9  -1 612.678 20.5950   1
   5   9   1 650.217 34.5819   2
   5   9   1 651.082 23.3021   1
  -6  -9  -1 632.895 22.7608   4
  -6  -9  -1 638.021 21.6511   4
  -6  -9  -1 645.946 27.4202   3
   6   9   1 588.929 35.0858   2
   6   9   1 624.351 24.1426   1
  -7  -9  -1 375.907 16.6491   4
  -7  -9  -1 369.123 20.1050   3
   7   9   1 352.897 18.0334   1
   7   9   1 413.392 30.0008   2
  -8  -9  -1 377.526 17.8381   4
  -8  -9  -1 396.243 21.1165   3
   8   9   1 389.120 30.8000   2
   8   9   1 361.336 19.0021   1
 -11  10   1 473.004 18.6333   3
 -11  10   1 461.179 30.8975   2
 -11  10   1 460.986 24.1354   4
 -10  10   1 457.863 22.6151   4
 -10  10   1 440.140 28.5631   2
 -10  10   1 427.972 18.9871   3
  -9  10   1 528.068 22.1046   3
  -9  10   1 572.913 31.5458   2
  -9  10   1 505.274 23.1067   4
  -8  10   1 638.133 32.6019   2
  -8  10   1 671.695 25.8238   3
  -8  10   1 641.483 25.1813   4
   7 -10  -1 545.058 22.0699   3
  -7  10   1 515.504 19.2254   4
  -7  10   1 625.288 30.3448   2
  -7  10   1 582.437 21.9489   4
   6 -10  -1 713.905 26.5377   3
  -6  10   1 771.750 33.4879   2
  -6  10   1 738.487 24.0813   4
  -6  10   1 704.342 21.7924   4
   5 -10  -1 310.958 15.9979   3
  -5  10   1 325.175 11.5121   4
  -5  10   1 331.573 20.0011   2
  -5  10   1 323.480 12.8234   4
   4 -10  -1 543.186 22.6598   3
  -4  10   1 554.917 15.0335   1
  -4  10   1 548.966 15.4553   4
  -4  10   1 564.602 16.4269   4
  -4  10   1 575.550 27.0343   2
   3 -10  -1 825.686 29.9111   3
  -3  10   1 824.089 21.7894   1
  -3  10   1 869.155 34.1696   2
   2 -10  -1 5.35174 3.22448   3
  -2  10   1 5.70402 3.89919   2
  -2  10   1 3.52381 1.41361   1
   1 -10  -1 1.64880 2.07987   3
  -1  10   1 3.24443 2.93219   2
  -1  10   1 4.17360 1.60340   1
   0 -10  -1 4.50161 2.70235   3
   0  10   1 8.76661 3.68655   2
   0  10   1 3.40503 1.59617   1
  -1 -10  -1 5.53395 3.58100   3
   1  10   1 10.0839 2.62504   1
   1  10   1 9.15921 4.73392   2
  -2 -10  -1 50.2498 4.43632   1
  -2 -10  -1 63.8604 9.57220   3
   2  10   1 80.5256 13.5610   2
   2  10   1 50.0629 5.83341   1
  -3 -10  -1 2.24394 0.92641   4
  -3 -10  -1 0.77455 1.16724   1
  -3 -10  -1 4.59889 1.23491   4
  -3 -10  -1 2.73193 2.56604   3
   3  10   1 1.24341 1.53435   1
   3  10   1 6.13692 3.75025   2
  -4 -10  -1 -0.0359 1.37429   1
  -4 -10  -1 2.54534 1.33083   4
  -4 -10  -1 2.54789 1.14756   4
  -4 -10  -1 0.41871 2.00941   3
   4  10   1 -0.5139 1.15952   1
   4  10   1 -0.2980 1.91352   2
  -5 -10  -1 47.1891 4.49538   4
  -5 -10  -1 41.9384 5.30066   4
  -5 -10  -1 46.1363 8.73486   3
   5  10   1 42.4629 6.97454   1
   5  10   1 44.5510 10.7694   2
  -6 -10  -1 25.7830 4.52279   4
  -6 -10  -1 30.0214 7.27837   3
   6  10   1 34.0086 11.0482   2
  -7 -10  -1 3.88668 1.90894   4
  -7 -10  -1 20.0437 6.21653   3
   7  10   1 11.8965 6.12344   2
   7  10   1 12.9576 3.98227   1
 -10  11   1 44.4597 7.71844   3
 -10  11   1 57.2633 9.12725   4
 -10  11   1 33.4451 9.56757   2
  -9  11   1 66.1883 9.48074   3
  -9  11   1 60.3210 12.0666   2
  -9  11   1 86.2592 10.5921   4
  -8  11   1 299.451 17.0447   3
  -8  11   1 296.721 21.6990   2
  -8  11   1 321.716 16.2651   4
   7 -11  -1 364.114 18.1488   3
  -7  11   1 357.561 14.5316   4
  -7  11   1 398.238 24.3345   2
  -7  11   1 373.392 16.4477   4
   6 -11  -1 516.561 22.5202   3
  -6  11   1 526.364 27.4985   2
  -6  11   1 504.459 16.6908   4
   5 -11  -1 245.099 14.7537   3
  -5  11   1 262.263 10.5892   4
  -5  11   1 257.782 9.48391   4
   4 -11  -1 287.828 16.2394   3
  -4  11   1 299.254 9.06641   4
  -4  11   1 303.731 19.6813   2
  -4  11   1 293.764 9.38459   4
   3 -11  -1 250.697 15.6287   3
  -3  11   1 275.223 11.4334   1
  -3  11   1 256.531 17.7710   2
   2 -11  -1 669.125 33.3679   3
  -2  11   1 712.329 31.2406   2
  -2  11   1 629.535 19.4542   1
   1 -11  -1 756.215 29.3236   3
  -1  11   1 711.181 32.0848   2
  -1  11   1 716.335 21.8840   1
   0 -11  -1 1093.72 38.3337   3
   0  11   1 1096.96 31.1969   1
   0  11   1 1161.08 43.3395   2
  -1 -11  -1 730.460 29.7537   3
   1  11   1 723.928 35.2834   2
   1  11   1 729.867 23.5891   1
  -2 -11  -1 275.867 11.7745   1
  -2 -11  -1 318.274 18.4000   3
   2  11   1 279.805 13.4754   1
   2  11   1 311.608 21.4051   2
  -3 -11  -1 285.103 12.5107   1
  -3 -11  -1 319.438 18.9241   3
   3  11   1 319.160 22.8842   2
   3  11   1 303.683 14.6887   1
  -5 -11  -1 571.647 27.3709   3
   5  11   1 608.466 24.2977   1
   5  11   1 605.928 35.7363   2
   6  11   1 270.035 15.7720   1
   6  11   1 242.799 23.1378   2
 -10  12   1 106.647 10.1855   3
  -9  12   1 148.357 11.3195   4
  -9  12   1 163.876 16.8982   2
  -9  12   1 155.147 12.4719   3
   8 -12  -1 175.801 12.7127   3
  -8  12   1 168.216 16.6095   2
  -8  12   1 173.046 11.2860   4
   7 -12  -1 129.491 10.9574   3
  -7  12   1 138.351 14.3458   2
  -7  12   1 112.956 7.77502   4
  -7  12   1 139.493 9.03141   4
   6 -12  -1 138.909 11.5881   3
  -6  12   1 149.178 7.42555   4
  -6  12   1 161.976 8.62725   4
  -6  12   1 165.604 15.4087   2
   5 -12  -1 65.0619 9.58260   3
  -5  12   1 71.1296 4.46206   4
  -5  12   1 78.9498 12.9959   2
   4 -12  -1 164.333 12.5892   3
  -4  12   1 183.758 15.7349   2
   3 -12  -1 81.2916 10.2419   3
  -3  12   1 72.4182 12.6756   2
  -3  12   1 69.7108 4.90503   1
   2 -12  -1 6.83169 3.71715   3
  -2  12   1 11.3847 2.71895   1
  -2  12   1 5.42064 3.50253   2
   1 -12  -1 6.09501 3.71298   3
  -1  12   1 3.55310 1.80329   1
  -1  12   1 6.37492 4.20049   2
   0 -12  -1 72.5100 10.5828   3
   0  12   1 117.405 17.0656   2
  -1 -12  -1 22.3299 6.21393   3
   1  12   1 19.4889 7.17792   2
   1  12   1 21.7266 4.34616   1
  -2 -12  -1 124.951 11.9593   3
   2  12   1 103.704 8.29139   1
   2  12   1 119.545 18.2994   2
  -3 -12  -1 282.398 18.5567   3
   3  12   1 306.304 23.4563   2
  -4 -12  -1 91.9032 18.1996   3
   4  12   1 103.571 17.7895   2
   8 -13  -1 239.383 15.9010   3
  -8  13   1 286.354 21.9717   2
  -8  13   1 248.144 13.2891   4
   7 -13  -1 227.022 15.3688   3
  -7  13   1 233.398 11.2979   4
  -7  13   1 215.620 18.8781   2
   6 -13  -1 648.881 27.7894   3
  -6  13   1 667.373 33.5154   2
  -6  13   1 595.085 18.2741   4
   5 -13  -1 768.622 31.6120   3
  -5  13   1 813.392 37.1530   2
   4 -13  -1 1057.98 38.5932   3
  -4  13   1 1050.60 43.3967   2
   3 -13  -1 737.604 31.4653   3
  -3  13   1 750.296 35.1976   2
   2 -13  -1 518.857 25.1416   3
  -2  13   1 446.230 26.5868   2
   1 -13  -1 557.494 27.1651   3
  -1  13   1 569.111 30.4221   2
   0 -13  -1 328.974 20.1917   3
   0  13   1 314.109 22.6850   2
  -1 -13  -1 179.638 14.7340   3
   1  13   1 157.914 16.1790   2
  -2 -13  -1 318.528 21.6945   3
   2  13   1 330.275 24.3429   2
  -3 -13  -1 248.518 17.8261   3
   3  13   1 206.594 27.8346   2
   7 -14  -1 5.09328 3.02857   3
  -7  14   1 5.43975 7.37761   2
   6 -14  -1 1.07805 2.08478   3
  -6  14   1 -0.1105 1.63866   2
   5 -14  -1 39.4282 8.15110   3
  -5  14   1 33.7237 9.32103   2
   4 -14  -1 78.5087 11.4250   3
  -4  14   1 111.494 16.7087   2
   3 -14  -1 135.118 12.6787   3
  -3  14   1 103.232 15.6704   2
   2 -14  -1 132.766 18.7657   3
  -2  14   1 125.210 17.1649   2
   1 -14  -1 235.391 18.2109   3
  -1  14   1 215.800 18.8590   2
   0 -14  -1 253.398 18.3977   3
   0  14   1 250.806 20.6814   2
  -1 -14  -1 294.556 20.2883   3
   1  14   1 293.040 23.1026   2
  -1  15  -2 51.7574 11.0775   2
   1 -15   2 32.8097 7.56063   3
  -2  15  -2 2.90346 3.12406   2
   2 -15   2 0.09413 1.84572   3
  -3  15  -2 20.1467 6.82946   2
   3 -15   2 8.54696 4.63289   3
  -4  15  -2 21.0226 6.44789   2
   4 -15   2 15.4547 5.94339   3
  -5  15  -2 134.705 13.8461   2
   5 -15   2 102.309 14.0188   3
   2  14  -2 356.594 24.3113   2
  -2 -14   2 419.422 23.7145   3
   1  14  -2 403.777 24.9273   2
  -1 -14   2 437.557 24.1559   3
  -1  14  -2 413.175 24.0373   2
  -2  14  -2 338.218 21.2548   2
   2 -14   2 340.740 20.7941   3
  -3  14  -2 414.719 23.8290   2
  -3  14  -2 420.159 13.9585   4
   3 -14   2 413.594 22.8043   3
  -4  14  -2 459.059 25.0893   2
  -4  14  -2 416.969 15.5878   4
   4 -14   2 457.166 24.1402   3
  -5  14  -2 238.594 11.9041   4
  -5  14  -2 218.906 17.1634   2
   5 -14   2 210.219 15.8585   3
  -6  14  -2 136.819 13.7052   2
  -6  14  -2 120.389 9.05917   4
   6 -14   2 129.486 12.4314   3
  -7  14  -2 30.2993 7.35233   3
  -7  14  -2 32.1822 6.14290   4
  -7  14  -2 25.5205 7.53642   2
   4  13  -2 7.83838 4.52649   2
  -4 -13   2 2.41727 3.14400   3
   3  13  -2 6.25278 4.23915   2
  -3 -13   2 4.56541 4.37512   3
   2  13  -2 3.68854 3.35169   2
  -2 -13   2 2.51909 3.03645   3
   1  13  -2 6.01421 3.76515   2
  -1 -13   2 16.5734 5.34532   3
   0 -13   2 0.42498 0.79071   1
   0 -13   2 12.7724 5.52126   3
  -1  13  -2 143.539 13.0577   2
   1 -13   2 148.831 13.0175   3
  -2  13  -2 80.7319 11.4110   2
  -2  13  -2 80.4065 5.04954   4
  -2  13  -2 79.2493 5.28995   4
   2 -13   2 102.626 13.3950   3
  -3  13  -2 131.925 12.3314   2
  -3  13  -2 116.502 7.13772   4
  -3  13  -2 121.182 6.63360   4
   3 -13   2 87.1892 11.5747   3
  -4  13  -2 231.903 19.0857   2
  -4  13  -2 211.472 9.89046   4
   4 -13   2 238.931 16.0906   3
  -5  13  -2 308.495 14.5667   4
  -5  13  -2 313.838 20.1204   2
   5 -13   2 344.934 19.5007   3
  -6  13  -2 664.349 31.5880   2
  -6  13  -2 691.839 25.2743   4
   6 -13   2 694.405 29.6633   3
  -7  13  -2 672.715 30.2236   3
  -7  13  -2 636.615 25.6492   4
  -7  13  -2 659.600 32.0257   2
  -8  13  -2 180.967 14.9312   3
  -8  13  -2 196.948 17.2327   2
  -8  13  -2 173.652 15.0642   4
  -9  13  -2 224.434 19.1198   2
  -9  13  -2 196.557 15.6778   3
  -9  13  -2 230.797 15.5877   4
   5  12  -2 338.011 24.9580   2
  -5 -12   2 299.546 19.1892   3
   4  12  -2 636.664 33.4639   2
   4  12  -2 585.276 25.5904   1
  -4 -12   2 595.258 27.9240   3
   3  12  -2 351.777 16.4995   1
   3  12  -2 366.772 23.5394   2
  -3 -12   2 352.169 20.3997   3
   2  12  -2 479.620 19.1628   1
   2  12  -2 461.426 16.8714   4
  -2 -12   2 501.887 24.5262   3
  -2 -12   2 514.987 15.8774   4
   1  12  -2 271.718 12.9460   1
   1  12  -2 276.652 18.3753   2
   1  12  -2 268.976 11.1564   4
  -1 -12   2 288.125 10.4994   4
  -1 -12   2 294.985 17.6809   3
  -1 -12   2 282.479 11.4228   1
   0  12  -2 319.139 13.7134   1
   0  12  -2 337.056 12.3661   4
   0  12  -2 357.161 20.6509   2
   0 -12   2 350.660 11.8665   4
   0 -12   2 368.662 19.9181   3
   0 -12   2 353.442 12.5034   1
  -1  12  -2 207.435 9.10779   4
  -1  12  -2 220.100 10.1528   1
  -1  12  -2 214.540 15.3476   2
   1 -12   2 233.343 9.01109   1
   1 -12   2 235.201 9.27356   4
   1 -12   2 238.662 15.5956   3
  -2  12  -2 427.408 22.4146   2
  -2  12  -2 405.854 14.1339   1
  -2  12  -2 409.081 14.0956   4
   2 -12   2 422.134 14.3749   4
   2 -12   2 443.356 21.7658   3
  -3  12  -2 719.310 22.4309   4
  -3  12  -2 690.863 21.1488   4
  -3  12  -2 685.519 29.3474   2
   3 -12   2 769.735 29.9875   3
  -4  12  -2 392.053 15.8213   4
  -4  12  -2 376.680 14.2927   4
  -4  12  -2 371.628 20.7804   2
   4 -12   2 402.403 20.4286   3
  -5  12  -2 19.1773 4.45830   4
  -5  12  -2 18.4413 5.40025   2
  -5  12  -2 18.2884 4.32685   4
   5 -12   2 14.0206 4.45535   3
  -6  12  -2 54.5163 7.45680   4
  -6  12  -2 55.6722 11.3133   2
  -6  12  -2 67.9955 8.60549   4
   6 -12   2 50.7496 8.38416   3
  -7  12  -2 -0.7025 1.82734   3
  -7  12  -2 4.15904 2.62690   4
  -7  12  -2 2.97131 3.07804   2
  -8  12  -2 -0.3117 1.19688   4
  -8  12  -2 2.21937 2.57259   3
  -8  12  -2 -0.6802 1.64138   2
  -9  12  -2 24.5141 6.41672   4
  -9  12  -2 33.6949 7.94023   3
  -9  12  -2 44.7108 10.2628   2
 -10  12  -2 22.9955 8.13837   2
 -10  12  -2 18.8258 5.64229   4
 -10  12  -2 19.9016 5.92316   3
   6  11  -2 5.10647 2.53479   1
   6  11  -2 14.8920 7.27216   2
  -6 -11   2 7.54423 2.82564   4
  -6 -11   2 8.41498 3.95925   3
   5  11  -2 106.200 15.6537   2
   5  11  -2 114.676 9.46347   1
  -5 -11   2 103.167 7.56923   4
  -5 -11   2 115.281 10.9883   3
   4  11  -2 397.706 24.7172   2
   4  11  -2 341.061 15.7643   4
   4  11  -2 372.710 17.1352   1
  -4 -11   2 351.466 14.8051   1
  -4 -11   2 373.415 20.1198   3
  -4 -11   2 367.375 14.5169   4
   3  11  -2 287.921 19.6192   2
   3  11  -2 248.346 13.0818   1
   3  11  -2 223.785 11.7148   4
  -3 -11   2 274.708 11.3546   4
  -3 -11   2 270.727 16.6125   3
   2  11  -2 256.977 17.7100   2
   2  11  -2 253.727 11.4802   4
   2  11  -2 276.938 13.0087   1
  -2 -11   2 233.537 15.3678   3
  -2 -11   2 257.879 10.5077   4
   1  11  -2 128.202 7.43453   4
   1  11  -2 130.385 11.9438   2
   1  11  -2 148.990 8.75333   1
  -1 -11   2 150.570 12.0589   3
  -1 -11   2 143.719 7.49111   1
  -1 -11   2 143.575 7.15684   4
   0  11  -2 857.034 25.5023   1
   0  11  -2 904.031 33.8331   2
   0  11  -2 813.589 24.0692   4
   0 -11   2 875.190 23.6757   1
   0 -11   2 901.830 32.4204   3
   0 -11   2 888.480 23.7030   4
  -1  11  -2 984.956 27.2279   4
  -1  11  -2 1016.26 27.7033   1
  -1  11  -2 1005.80 36.3711   2
   1 -11   2 1040.88 25.9623   1
   1 -11   2 1043.86 27.0971   4
  -2  11  -2 553.245 18.8454   1
  -2  11  -2 564.004 24.7310   2
  -2  11  -2 539.796 17.2845   4
   2 -11   2 553.577 17.6293   4
   2 -11   2 560.025 24.4751   3
   2 -11   2 562.123 15.2777   1
  -3  11  -2 711.749 21.1541   4
  -3  11  -2 696.630 28.5229   2
   3 -11   2 709.850 21.9188   4
  -4  11  -2 659.954 20.9674   4
  -4  11  -2 686.578 28.4912   2
  -4  11  -2 686.424 22.8579   4
   4 -11   2 668.172 26.6578   3
  -5  11  -2 750.850 30.6097   2
  -5  11  -2 720.913 25.2114   4
   5 -11   2 715.673 27.9946   3
  -6  11  -2 1542.92 43.1137   4
  -6  11  -2 1698.60 47.4042   4
  -6  11  -2 1641.84 53.2487   2
  -6  11  -2 1699.36 51.5031   3
  -7  11  -2 1090.48 36.1294   4
  -7  11  -2 1050.36 41.5601   2
  -7  11  -2 1063.19 44.8168   3
  -8  11  -2 567.753 29.1546   2
  -8  11  -2 510.328 23.8544   4
  -9  11  -2 433.115 26.6655   2
  -9  11  -2 449.147 23.0864   4
  -9  11  -2 486.259 22.9353   3
 -10  11  -2 484.231 23.2342   3
 -10  11  -2 468.954 28.9163   2
 -10  11  -2 498.421 25.2448   4
   7  10  -2 237.243 21.9612   2
  -7 -10   2 295.131 17.3482   3
  -7 -10   2 318.032 15.6485   4
   6  10  -2 340.643 17.1503   1
   6  10  -2 344.329 24.9989   2
  -6 -10   2 318.318 15.2881   4
  -6 -10   2 340.137 18.7652   3
   5  10  -2 325.316 23.0785   2
   5  10  -2 361.787 16.8600   1
  -5 -10   2 320.383 14.2195   1
  -5 -10   2 376.835 19.4282   3
  -5 -10   2 338.117 14.8669   4
   4  10  -2 375.114 23.4057   2
   4  10  -2 391.250 17.0871   4
   4  10  -2 410.742 17.5466   1
  -4 -10   2 421.884 20.7121   3
  -4 -10   2 413.186 15.6824   1
  -4 -10   2 412.250 15.7961   4
   3  10  -2 27.2177 4.40860   1
   3  10  -2 30.9784 4.95621   4
   3  10  -2 28.9343 7.85808   2
  -3 -10   2 39.8117 5.05253   4
  -3 -10   2 28.3906 4.10294   1
   2  10  -2 4.19695 1.89151   1
   2  10  -2 7.16342 2.26540   4
   2  10  -2 1.53162 2.06905   2
  -2 -10   2 2.97734 1.57860   1
  -2 -10   2 2.34960 2.63871   3
  -2 -10   2 10.8735 2.44014   4
   1  10  -2 103.288 10.0763   2
   1  10  -2 100.632 6.40583   4
   1  10  -2 110.584 7.05487   1
  -1 -10   2 97.6364 5.93743   1
  -1 -10   2 109.372 9.53919   3
  -1 -10   2 108.741 6.11248   4
  -1 -10   2 107.478 9.77625   2
   0  10  -2 50.8738 4.54866   1
   0  10  -2 61.4677 9.47392   2
   0  10  -2 50.2908 4.26131   4
   0 -10   2 51.4408 4.02959   4
   0 -10   2 26.4009 5.42300   3
   0 -10   2 47.4875 3.83719   1
   0 -10   2 44.6311 7.54421   2
  -1  10  -2 62.5263 8.83010   2
  -1  10  -2 67.1184 4.71286   1
  -1  10  -2 55.1474 4.38158   4
   1 -10   2 68.2657 10.1467   2
   1 -10   2 59.9629 3.92383   1
   1 -10   2 61.2074 4.47886   4
   1 -10   2 45.0344 6.86462   3
  -2  10  -2 35.0159 3.87160   1
  -2  10  -2 33.3239 4.22007   4
  -2  10  -2 40.7968 7.64865   2
   2 -10   2 30.7433 6.93246   3
   2 -10   2 27.3179 2.47651   1
   2 -10   2 36.2256 4.53644   4
   2 -10   2 32.0080 6.87766   2
  -3  10  -2 54.2996 4.53175   4
  -3  10  -2 56.4636 8.18293   2
  -3  10  -2 59.8043 9.67872   2
  -3  10  -2 57.1146 3.42098   1
   3 -10   2 56.2009 4.94178   4
   3 -10   2 45.5748 6.90714   3
  -4  10  -2 115.181 14.6630   4
  -4  10  -2 93.9798 9.21401   2
  -4  10  -2 96.8837 6.37166   4
  -4  10  -2 112.883 11.0667   2
   4 -10   2 101.463 8.99173   3
  -5  10  -2 12.6913 2.97534   4
  -5  10  -2 13.4244 3.63764   4
  -5  10  -2 19.5449 5.71110   2
   5 -10   2 11.7610 3.89156   3
  -6  10  -2 2.73501 2.57746   3
  -6  10  -2 7.78531 2.44992   4
  -6  10  -2 4.49597 2.94493   2
  -6  10  -2 2.45498 1.89369   4
  -7  10  -2 124.859 10.7097   3
  -7  10  -2 119.684 10.0102   4
  -7  10  -2 135.729 12.7010   2
  -8  10  -2 406.197 20.5451   4
  -8  10  -2 474.646 39.0030   2
  -8  10  -2 411.892 20.4601   3
  -9  10  -2 169.307 13.5862   4
  -9  10  -2 196.014 13.4393   3
  -9  10  -2 195.752 17.2518   2
 -10  10  -2 326.350 17.6917   3
 -10  10  -2 340.238 20.3912   4
 -10  10  -2 315.474 23.3271   2
 -11  10  -2 369.183 26.3652   2
 -11  10  -2 364.784 18.3825   3
 -11  10  -2 344.390 21.7394   4
   8   9  -2 140.729 22.2524   2
  -8  -9   2 152.742 11.8004   3
  -8  -9   2 167.393 11.9185   4
   7   9  -2 187.769 12.4273   1
   7   9  -2 176.366 22.9791   2
  -7  -9   2 165.581 11.4720   4
  -7  -9   2 175.689 12.7002   3
   6   9  -2 467.603 28.4738   2
   6   9  -2 470.857 19.9201   1
  -6  -9   2 467.900 18.9085   4
  -6  -9   2 402.072 20.2710   3
   5   9  -2 362.099 18.4598   4
   5   9  -2 407.320 17.5680   1
   5   9  -2 379.096 24.1812   2
  -5  -9   2 421.542 16.6781   4
  -5  -9   2 408.436 19.5682   3
   4   9  -2 617.998 22.3771   1
   4   9  -2 701.447 31.4832   2
  -4  -9   2 642.526 25.5964   3
  -4  -9   2 664.569 21.5117   4
  -4  -9   2 635.188 20.7761   1
   3   9  -2 1361.90 38.2132   4
   3   9  -2 1390.19 47.1604   2
   3   9  -2 1408.53 38.2518   1
  -3  -9   2 1422.75 36.3763   1
  -3  -9   2 1407.41 42.6714   3
   2   9  -2 1121.15 31.5506   1
   2   9  -2 1136.21 31.5766   4
   2   9  -2 1140.28 39.2917   2
  -2  -9   2 1169.26 30.3907   4
  -2  -9   2 1146.66 30.1561   1
  -2  -9   2 1117.96 37.5116   2
  -2  -9   2 1178.46 37.1316   3
   1   9  -2 352.449 13.2839   1
   1   9  -2 341.824 13.1117   4
   1   9  -2 388.190 18.9618   2
  -1  -9   2 349.227 12.2325   1
  -1  -9   2 372.465 12.7111   4
  -1  -9   2 354.483 17.1705   3
   0   9  -2 206.818 12.8069   2
   0   9  -2 188.431 8.69386   4
   0   9  -2 200.880 8.74385   1
   0  -9   2 198.959 12.3046   3
   0  -9   2 182.596 12.0328   2
   0  -9   2 196.722 8.41200   4
   0  -9   2 202.579 7.96892   1
  -1   9  -2 1328.08 40.0802   2
  -1   9  -2 1238.25 32.8771   4
  -1   9  -2 1302.90 32.3795   1
   1  -9   2 1291.48 40.1293   2
   1  -9   2 1354.66 33.1225   4
   1  -9   2 1318.71 39.3534   3
   1  -9   2 1342.84 31.1767   1
  -2   9  -2 2334.42 52.2460   1
   2  -9   2 2321.11 62.7496   2
  -3   9  -2 2168.52 51.2059   4
  -3   9  -2 2226.93 59.1184   2
  -3   9  -2 2056.31 60.5220   2
  -3   9  -2 2164.99 47.3528   1
  -4   9  -2 1423.87 37.0276   4
  -4   9  -2 1460.76 44.3506   2
   4  -9   2 1455.47 42.2227   3
  -5   9  -2 1220.34 43.7668   2
  -5   9  -2 1211.63 33.9291   4
  -5   9  -2 1313.54 36.9003   4
  -5   9  -2 1252.42 41.3170   2
   5  -9   2 1305.29 38.5660   3
  -6   9  -2 328.018 14.0111   4
  -6   9  -2 323.651 15.8165   4
  -6   9  -2 314.123 16.3122   3
  -6   9  -2 309.167 18.3310   2
  -7   9  -2 901.389 35.8192   2
  -7   9  -2 846.379 30.5677   3
  -7   9  -2 863.812 30.7805   4
  -8   9  -2 389.416 23.2865   2
  -8   9  -2 390.419 18.8119   3
  -8   9  -2 415.968 20.4302   4
  -9   9  -2 677.492 28.9685   4
  -9   9  -2 630.714 32.4353   2
  -9   9  -2 683.300 26.2076   3
 -10   9  -2 291.066 18.7217   4
 -10   9  -2 307.330 22.6653   2
 -10   9  -2 267.849 14.9438   3
 -11   9  -2 101.093 14.1158   4
 -11   9  -2 112.201 9.20811   3
 -11   9  -2 156.846 22.1749   2
   9   8  -2 137.390 11.4093   1
   9   8  -2 143.030 22.7590   2
  -9  -8   2 138.804 11.5380   4
  -9  -8   2 136.165 10.6800   3
   8   8  -2 170.492 11.9416   1
   8   8  -2 131.301 18.8289   2
  -8  -8   2 168.795 13.4694   3
  -8  -8   2 176.172 12.3214   4
   7   8  -2 344.706 24.8493   2
   7   8  -2 360.492 17.1741   1
  -7  -8   2 317.610 16.7495   3
  -7  -8   2 338.185 16.6308   4
   6   8  -2 451.658 27.0963   2
  -6  -8   2 422.831 18.1773   4
  -6  -8   2 440.282 19.6801   3
  -6  -8   2 445.558 18.6996   1
   5   8  -2 303.897 20.4929   2
   5   8  -2 297.533 15.0497   4
   5   8  -2 322.132 14.5900   1
  -5  -8   2 312.002 14.0042   4
  -5  -8   2 294.389 15.4087   3
  -5  -8   2 283.364 12.5498   1
   4   8  -2 17.9915 3.38233   1
   4   8  -2 24.5641 4.55011   4
   4   8  -2 19.4965 6.36600   2
  -4  -8   2 22.9762 4.06507   1
  -4  -8   2 32.0361 4.85477   4
  -4  -8   2 23.6723 5.66449   3
   3   8  -2 292.368 17.3576   2
   3   8  -2 266.124 12.4825   4
   3   8  -2 306.881 12.7097   1
  -3  -8   2 279.631 11.2776   1
  -3  -8   2 289.386 15.7846   2
  -3  -8   2 282.374 14.6243   3
  -3  -8   2 276.089 11.6363   4
   2   8  -2 7.44567 3.94164   3
   2   8  -2 8.97698 3.56526   2
   2   8  -2 12.4094 2.89094   4
   2   8  -2 8.31225 2.30554   1
  -2  -8   2 9.55849 3.47870   2
  -2  -8   2 9.64300 2.45447   4
  -2  -8   2 5.38909 2.44690   3
  -2  -8   2 11.0684 2.19335   1
   1   8  -2 100.478 6.15986   4
   1   8  -2 101.282 8.21680   3
   1   8  -2 108.425 6.22103   1
   1   8  -2 101.946 9.88304   2
  -1  -8   2 92.6313 7.98902   2
  -1  -8   2 102.285 5.78010   4
  -1  -8   2 92.5925 7.90892   3
   0   8  -2 46.6964 3.67860   1
   0   8  -2 46.7402 6.88256   3
   0   8  -2 41.3440 3.69861   4
   0   8  -2 54.8396 7.60657   2
   0  -8   2 41.2472 6.52979   2
   0  -8   2 51.6921 3.87403   4
   0  -8   2 36.3930 5.69737   3
   0  -8   2 38.7404 3.12583   1
  -1   8  -2 79.6207 4.98761   4
  -1   8  -2 78.7115 4.48177   1
  -1   8  -2 73.6591 6.82374   3
  -1   8  -2 81.2393 7.19730   2
   1  -8   2 72.1921 4.76754   4
   1  -8   2 71.8167 6.86735   2
  -2   8  -2 275.841 8.77434   1
  -2   8  -2 256.445 10.2409   4
  -2   8  -2 261.750 13.4771   3
  -2   8  -2 274.865 13.9384   2
   2  -8   2 270.359 10.5287   4
   2  -8   2 274.477 13.6391   3
   2  -8   2 275.367 8.06705   1
   2  -8   2 300.002 14.8610   2
  -3   8  -2 507.706 13.5343   1
  -3   8  -2 512.206 16.2607   4
  -3   8  -2 475.643 21.5449   2
  -3   8  -2 505.994 19.8002   3
  -3   8  -2 533.514 20.7603   2
   3  -8   2 514.084 17.1133   4
   3  -8   2 533.732 20.0167   3
  -4   8  -2 697.642 24.7027   3
  -4   8  -2 699.418 28.2365   2
  -4   8  -2 686.053 20.9638   4
  -4   8  -2 718.186 26.4222   2
   4  -8   2 714.939 22.7352   4
   4  -8   2 741.898 24.7864   3
  -5   8  -2 113.086 8.44046   3
  -5   8  -2 113.810 10.0012   2
  -5   8  -2 123.077 9.26731   3
  -5   8  -2 112.662 8.12709   4
  -5   8  -2 109.329 7.05826   4
  -6   8  -2 584.598 21.9273   3
  -6   8  -2 599.202 22.8610   3
  -6   8  -2 558.116 27.3720   2
  -6   8  -2 632.280 23.3427   4
  -6   8  -2 627.213 26.7535   2
  -6   8  -2 575.854 20.5584   4
  -7   8  -2 558.174 21.5870   3
  -7   8  -2 589.063 23.8061   4
  -7   8  -2 594.271 27.5295   2
  -7   8  -2 590.734 22.9714   3
  -8   8  -2 313.773 15.8269   3
  -8   8  -2 325.226 15.2761   3
  -8   8  -2 337.630 18.0846   4
  -8   8  -2 323.730 20.7141   2
  -9   8  -2 656.461 24.8997   3
  -9   8  -2 673.589 28.8437   4
  -9   8  -2 720.045 34.2527   2
  -9   8  -2 655.788 23.9904   3
   9  -8   2 697.266 34.4405   2
 -10   8  -2 581.759 27.4320   4
 -10   8  -2 525.541 21.1478   3
 -10   8  -2 604.696 22.6250   3
  10  -8   2 552.689 30.7570   2
 -11   8  -2 557.137 28.1264   4
 -11   8  -2 564.657 21.6831   3
  11  -8   2 583.736 33.3178   2
 -12   8  -2 435.355 25.8645   4
 -12   8  -2 483.009 18.9465   3
  12  -8   2 476.352 31.8777   2
  10   7  -2 81.7849 17.7513   2
  10   7  -2 64.4966 9.68098   1
 -10  -7   2 58.8280 9.30862   4
 -10  -7   2 68.2445 8.64091   3
   9   7  -2 270.431 24.2920   2
   9   7  -2 297.103 16.4547   1
  -9  -7   2 265.733 16.1520   4
  -9  -7   2 256.364 14.1422   3
   8   7  -2 628.868 36.1759   2
  -8  -7   2 655.850 25.8806   4
  -8  -7   2 639.151 24.4093   3
   7   7  -2 1252.54 51.4142   2
  -7  -7   2 1293.56 39.1518   4
  -7  -7   2 1272.65 38.4330   3
   6   7  -2 647.231 32.1884   2
   6   7  -2 621.462 22.7127   1
  -6  -7   2 647.819 23.4989   3
  -6  -7   2 613.775 22.8395   4
   5   7  -2 1610.08 53.6811   2
   5   7  -2 1617.01 48.9774   3
   5   7  -2 1532.81 44.4636   4
   5   7  -2 1573.70 42.7039   1
  -5  -7   2 1597.81 44.3671   3
  -5  -7   2 1564.41 40.8009   1
  -5  -7   2 1609.05 43.1556   4
   4   7  -2 1893.72 56.8684   2
   4   7  -2 1850.09 46.6431   1
   4   7  -2 1770.44 49.4367   3
   4   7  -2 1785.63 47.8237   4
  -4  -7   2 1802.34 46.3831   4
  -4  -7   2 1813.19 52.8718   2
  -4  -7   2 1848.42 45.0118   1
   3   7  -2 2169.26 54.4722   4
   3   7  -2 2253.49 57.5559   3
  -3  -7   2 2206.57 59.1618   2
  -2  -7   2 2654.42 67.0416   2
   1   7  -2 1844.04 51.2459   3
  -1  -7   2 1908.93 49.8911   2
   0   7  -2 973.411 24.5677   1
   0   7  -2 938.375 25.2698   4
   0   7  -2 1002.97 30.0643   2
   0   7  -2 941.138 29.2282   3
   0  -7   2 949.850 29.3552   2
  -1   7  -2 1593.23 42.9597   3
  -2   7  -2 1182.02 29.7283   4
  -2   7  -2 1161.10 27.0221   1
  -2   7  -2 1136.10 33.5691   3
   2  -7   2 1203.05 30.1841   4
   2  -7   2 1181.79 34.8535   2
  -3   7  -2 2051.72 55.7599   2
  -4   7  -2 568.803 23.5661   2
  -4   7  -2 547.256 21.9313   2
  -4   7  -2 566.766 20.1794   3
  -4   7  -2 570.637 17.9543   4
   4  -7   2 571.481 20.1919   3
   4  -7   2 534.861 18.7651   4
  -5   7  -2 449.785 21.9735   2
  -5   7  -2 470.108 18.0701   3
  -5   7  -2 471.709 18.6653   3
  -5   7  -2 508.233 17.2487   4
  -5   7  -2 491.365 21.3824   2
  -5   7  -2 476.359 18.3423   4
  -6   7  -2 679.638 22.9618   4
  -6   7  -2 700.391 23.6159   3
  -6   7  -2 717.252 28.6478   2
  -6   7  -2 705.264 25.2709   4
  -6   7  -2 693.498 29.9319   2
  -6   7  -2 712.062 24.5274   3
  -7   7  -2 461.177 18.4869   3
  -7   7  -2 428.326 17.4845   3
  -7   7  -2 430.074 19.7410   4
   7  -7   2 466.947 23.2733   2
  -8   7  -2 389.514 19.7763   4
  -8   7  -2 407.963 17.3814   3
   8  -7   2 412.353 23.1722   2
  -9   7  -2 68.5158 14.8926   4
  -9   7  -2 74.8721 6.57595   3
  -9   7  -2 70.2691 6.76861   3
   9  -7   2 88.4672 14.5950   2
 -10   7  -2 18.5983 4.23694   3
 -10   7  -2 25.4773 4.97776   3
 -10   7  -2 14.6644 5.45707   4
  10  -7   2 24.3093 7.55836   2
 -11   7  -2 32.5468 5.57819   3
 -11   7  -2 49.7250 9.87637   4
  11  -7   2 55.1356 11.7922   2
 -12   7  -2 18.9566 4.05823   3
 -12   7  -2 15.6151 6.14837   4
  12  -7   2 15.3571 9.06629   2
  10   6  -2 103.629 19.9015   2
  10   6  -2 66.2545 8.68305   1
 -10  -6   2 75.5236 6.91540   3
 -10  -6   2 98.7795 11.9473   4
   9   6  -2 156.898 20.9995   2
   9   6  -2 177.621 12.2007   1
  -9  -6   2 182.933 13.3182   4
  -9  -6   2 186.603 11.0738   3
   8   6  -2 78.8708 12.7846   2
   8   6  -2 129.984 9.66412   1
  -8  -6   2 126.826 8.99099   3
   7   6  -2 67.4961 13.8077   2
   7   6  -2 64.2872 9.39313   1
   7   6  -2 45.4746 6.91006   3
  -7  -6   2 63.4525 6.27993   3
  -7  -6   2 61.5075 8.25829   4
   6   6  -2 8.64361 2.65378   1
   6   6  -2 7.35120 4.46380   2
   6   6  -2 11.7350 3.43168   3
  -6  -6   2 8.29412 3.17901   3
  -6  -6   2 5.04850 2.10025   1
  -6  -6   2 8.69936 3.04905   4
   5   6  -2 342.640 15.8745   4
   5   6  -2 376.151 18.0839   3
   5   6  -2 352.230 20.9062   2
   5   6  -2 350.719 14.6141   1
  -5  -6   2 368.683 15.3462   4
  -5  -6   2 390.885 15.8618   3
  -5  -6   2 351.193 18.2532   2
   4   6  -2 565.325 20.5004   4
   4   6  -2 581.498 19.1613   1
   4   6  -2 611.500 21.3741   3
   4   6  -2 598.469 25.9689   2
  -4  -6   2 578.982 23.3095   2
  -4  -6   2 584.839 18.1701   1
  -4  -6   2 603.656 20.8125   3
  -4  -6   2 568.511 19.6432   4
   3   6  -2 10.9117 2.90961   4
   3   6  -2 10.4120 3.25595   3
   3   6  -2 6.73246 2.81781   2
   3   6  -2 8.46060 2.03657   1
  -3  -6   2 10.6699 2.21086   1
  -3  -6   2 19.8492 4.88843   2
  -3  -6   2 8.34180 2.43999   4
  -3  -6   2 7.53546 2.55440   3
   2   6  -2 5.66313 1.84931   4
   2   6  -2 4.90049 2.57515   2
   2   6  -2 8.82132 2.54066   3
   2   6  -2 3.86111 1.29500   1
  -2  -6   2 4.12331 1.47684   4
  -2  -6   2 3.12849 1.18547   1
  -2  -6   2 4.33421 2.01830   2
  -2  -6   2 6.14746 2.41117   3
   1   6  -2 340.491 14.1630   3
   1   6  -2 370.703 15.2186   2
   1   6  -2 358.510 12.4370   4
   1   6  -2 355.371 11.7311   1
  -1  -6   2 351.486 14.8826   3
  -1  -6   2 368.639 12.1153   4
  -1  -6   2 367.819 14.8449   2
   0   6  -2 674.833 21.4164   2
   0   6  -2 645.612 21.2868   3
   0   6  -2 635.485 19.6316   4
   0   6  -2 646.727 17.3618   1
   0  -6   2 656.612 16.9322   1
   0  -6   2 654.583 21.0457   2
   0  -6   2 653.574 18.0876   4
  -1   6  -2 587.616 15.3515   1
  -1   6  -2 592.018 19.9862   3
  -1   6  -2 611.294 19.7171   2
   1  -6   2 597.659 16.8714   4
   1  -6   2 577.385 19.5641   3
   1  -6   2 595.819 14.9538   1
   1  -6   2 620.501 20.1325   2
  -2   6  -2 689.749 21.7185   2
  -2   6  -2 641.237 18.2707   4
  -2   6  -2 653.774 15.7101   1
  -2   6  -2 621.383 22.0441   2
  -2   6  -2 661.136 21.3556   3
   2  -6   2 671.752 15.3219   1
   2  -6   2 660.603 21.2211   3
   2  -6   2 659.345 18.7811   4
  -3   6  -2 1393.11 36.7383   3
  -3   6  -2 1339.01 33.6416   4
  -3   6  -2 1340.94 39.2755   2
  -4   6  -2 2626.40 68.3549   2
  -5   6  -2 1891.11 47.6001   4
  -5   6  -2 1972.42 49.3595   3
  -5   6  -2 1833.92 54.7359   2
  -6   6  -2 1100.40 34.7614   4
  -6   6  -2 1172.72 32.6906   3
  -6   6  -2 1139.41 32.8676   4
   6  -6   2 1179.42 39.1940   2
  -7   6  -2 339.141 14.4088   3
  -7   6  -2 343.166 20.7824   2
  -7   6  -2 361.870 15.3523   3
  -7   6  -2 381.365 17.8501   4
   7  -6   2 380.114 20.7451   2
  -8   6  -2 1009.51 30.0809   3
  -8   6  -2 1010.97 30.5982   3
  -8   6  -2 1049.21 35.7074   4
   8  -6   2 1027.04 40.0598   2
  -9   6  -2 1313.79 50.8738   4
  -9   6  -2 1173.20 34.5106   3
  -9   6  -2 1226.21 35.2861   3
   9  -6   2 1244.08 47.8009   2
 -10   6  -2 671.015 22.7187   3
 -10   6  -2 731.699 31.1478   4
 -10   6  -2 724.435 23.6528   3
  10  -6   2 710.567 17.2006   1
  10  -6   2 706.428 35.7048   2
 -11   6  -2 454.245 17.1499   3
 -11   6  -2 396.678 16.8030   3
 -11   6  -2 463.790 24.8541   4
  11  -6   2 438.224 28.8765   2
  11  -6   2 446.630 12.2593   1
 -12   6  -2 325.905 13.8028   3
  12  -6   2 381.962 28.1773   2
  12  -6   2 336.898 10.3141   1
  11   5  -2 488.135 22.7180   1
  11   5  -2 495.612 35.7859   2
 -11  -5   2 528.881 30.2204   4
  10   5  -2 460.658 20.9513   1
  10   5  -2 474.382 32.8045   2
 -10  -5   2 461.214 17.6029   3
 -10  -5   2 459.561 23.2338   4
   9   5  -2 567.361 34.5503   2
   9   5  -2 567.804 21.2440   3
  -9  -5   2 585.109 20.7700   3
  -9  -5   2 649.962 26.5810   4
   8   5  -2 1302.86 53.0196   2
   8   5  -2 1227.83 37.6653   1
  -8  -5   2 1316.98 36.1377   3
  -8  -5   2 1280.65 40.7558   4
   7   5  -2 738.161 25.2959   1
   7   5  -2 753.944 24.9031   3
   7   5  -2 778.846 36.3813   2
  -7  -5   2 759.741 27.2699   4
  -7  -5   2 770.386 24.4346   3
   6   5  -2 1470.75 41.2671   3
   6   5  -2 1571.85 53.3238   2
   6   5  -2 1489.96 44.3484   4
   6   5  -2 1572.24 41.6057   1
  -6  -5   2 1594.31 41.0801   3
  -6  -5   2 1467.81 39.2367   1
  -6  -5   2 1613.96 43.8278   4
   5   5  -2 2906.56 68.1737   3
   5   5  -2 2738.81 72.9885   4
  -5  -5   2 2817.90 73.5062   2
   4   5  -2 837.149 26.1128   4
   4   5  -2 848.734 24.2729   1
   4   5  -2 853.409 25.4913   3
   4   5  -2 820.279 30.8105   2
  -4  -5   2 835.662 25.1554   4
  -4  -5   2 817.147 28.4126   2
  -4  -5   2 840.068 23.2747   1
  -4  -5   2 854.981 25.1827   3
   3   5  -2 880.109 26.1312   4
   3   5  -2 912.807 30.6050   2
   3   5  -2 930.055 26.6988   3
   3   5  -2 941.839 26.6560   1
  -3  -5   2 887.242 28.3105   2
  -3  -5   2 910.403 26.4412   3
  -3  -5   2 905.149 24.2137   1
  -3  -5   2 952.189 25.7605   4
   2   5  -2 1882.86 51.8970   5
   2   5  -2 1847.35 49.4824   6
  -2  -5   2 1894.83 49.2910   6
  -2  -5   2 1837.92 49.7531   5
   1   5  -2 3913.89 91.5616   5
   1   5  -2 3892.65 91.7149   6
  -1  -5   2 3946.41 91.7161   6
   0   5  -2 6612.61 144.673   5
   0   5  -2 6487.75 146.285   6
   0  -5   2 6648.50 144.457   5
  -1   5  -2 3172.74 74.1267   5
  -1   5  -2 3168.77 75.8507   6
   1  -5   2 3232.47 74.8547   5
   1  -5   2 3136.53 76.0388   6
  -2   5  -2 739.329 21.9088   3
  -2   5  -2 736.745 16.7214   1
  -2   5  -2 714.402 22.7268   2
   2  -5   2 742.138 20.1292   4
  -3   5  -2 143.047 9.05766   2
  -3   5  -2 149.154 6.98096   4
  -3   5  -2 170.992 9.23689   2
  -3   5  -2 156.049 8.05158   3
   3  -5   2 152.359 8.03343   3
   3  -5   2 154.885 7.63707   4
  -4   5  -2 181.846 9.15454   3
  -4   5  -2 169.751 8.20932   4
  -4   5  -2 173.451 8.56508   3
  -4   5  -2 152.057 10.3752   2
   4  -5   2 164.177 8.74767   4
   4  -5   2 177.485 10.4584   2
  -5   5  -2 688.093 27.0224   2
  -5   5  -2 736.212 23.9229   4
  -5   5  -2 740.940 22.7213   3
  -5   5  -2 701.792 21.6560   3
  -5   5  -2 704.896 22.1339   4
   5  -5   2 702.024 26.1470   2
  -6   5  -2 45.9346 5.88654   3
  -6   5  -2 56.8231 7.11169   4
  -6   5  -2 52.2960 7.44674   4
  -6   5  -2 40.3764 5.01578   3
  -6   5  -2 34.7831 6.53269   2
   6  -5   2 44.6019 8.46013   2
  -7   5  -2 47.5625 4.62101   3
  -7   5  -2 33.2782 5.60547   4
  -7   5  -2 47.5037 4.82161   3
  -7   5  -2 51.4920 8.56553   4
  -7   5  -2 52.5389 10.0454   2
   7  -5   2 44.2037 2.38115   1
   7  -5   2 42.4480 7.46787   2
  -8   5  -2 5.44247 2.04057   3
  -8   5  -2 4.91761 2.72977   4
  -8   5  -2 3.37923 1.93690   3
   8  -5   2 2.54278 2.62399   2
   8  -5   2 4.91448 1.28234   1
  -9   5  -2 114.677 10.9227   4
  -9   5  -2 117.278 9.07578   3
  -9   5  -2 109.049 7.25706   3
   9  -5   2 129.144 13.5772   2
   9  -5   2 103.263 5.04535   1
 -10   5  -2 82.0330 10.7316   4
 -10   5  -2 82.1799 6.52674   3
 -10   5  -2 85.9213 6.39330   3
  10  -5   2 72.4691 4.55469   1
  10  -5   2 97.7234 16.4357   2
 -11   5  -2 10.8644 2.91979   3
 -11   5  -2 6.69948 4.04139   4
 -11   5  -2 9.63884 2.78772   3
  11  -5   2 9.50912 2.33215   1
  11  -5   2 8.93749 4.92509   2
 -12   5  -2 88.3736 18.9622   4
  12  -5   2 72.1178 13.4547   2
  12  -5   2 95.2710 5.74311   1
  11   4  -2 4.71042 2.90027   1
 -11  -4   2 5.02384 3.55608   4
  10   4  -2 2.63794 2.34154   1
  10   4  -2 4.37085 3.97228   2
  10   4  -2 8.75330 2.66438   3
 -10  -4   2 6.99006 3.26696   4
   9   4  -2 11.0332 6.49247   2
   9   4  -2 7.83171 3.33998   1
   9   4  -2 12.1784 3.15943   3
  -9  -4   2 4.57646 2.67758   4
   8   4  -2 27.2915 4.43004   1
   8   4  -2 40.8322 5.57825   3
   8   4  -2 36.3104 10.4709   2
  -8  -4   2 38.5924 5.69844   3
  -8  -4   2 27.4787 5.75651   4
   7   4  -2 16.5561 3.35750   1
   7   4  -2 23.3949 7.36887   2
   7   4  -2 26.1126 4.39043   3
  -7  -4   2 21.8157 3.75672   3
  -7  -4   2 20.2982 4.65532   4
   6   4  -2 913.969 36.3363   2
   6   4  -2 879.549 26.3730   1
   6   4  -2 887.334 25.7998   3
   6   4  -2 880.966 29.6615   4
  -6  -4   2 853.493 24.8035   1
  -6  -4   2 868.578 32.1237   2
  -6  -4   2 859.916 28.2127   4
  -6  -4   2 856.610 25.1240   3
   5   4  -2 234.520 10.5106   3
   5   4  -2 224.416 10.3413   1
   5   4  -2 235.770 12.0911   4
   5   4  -2 232.135 15.2482   2
  -5  -4   2 223.275 13.3480   2
  -5  -4   2 231.051 11.5852   4
  -5  -4   2 229.770 10.1344   3
  -5  -4   2 227.513 9.67209   1
   4   4  -2 504.520 21.4103   2
   4   4  -2 465.123 17.2622   4
   4   4  -2 479.840 15.9620   3
  -4  -4   2 453.341 14.6821   1
  -4  -4   2 470.331 16.7602   4
  -4  -4   2 480.984 19.0322   2
  -4  -4   2 460.595 15.5995   3
   3   4  -2 1374.33 35.0355   3
   2   4  -2 1693.35 43.4452   6
   2   4  -2 1669.72 45.4533   5
  -2  -4   2 1653.96 43.1882   6
   1   4  -2 3365.92 76.4661   5
   1   4  -2 3226.62 76.2894   6
  -1  -4   2 3251.89 75.2791   5
   0   4  -2 1778.67 46.2845   6
   0   4  -2 1936.23 45.0916   5
   0  -4   2 1863.70 46.7383   6
   0  -4   2 1859.24 44.6547   5
  -1   4  -2 2762.22 63.5875   5
  -1   4  -2 2786.34 65.9330   6
   1  -4   2 2794.79 64.2621   5
  -2   4  -2 3303.67 76.6460   6
  -2   4  -2 3324.75 76.3397   5
  -2   4  -2 3288.34 77.3605   5
   2  -4   2 3296.57 76.7730   6
  -3   4  -2 2175.38 53.5467   6
  -3   4  -2 2001.83 58.7482   5
  -3   4  -2 2144.75 52.5325   6
   3  -4   2 2109.59 54.3505   5
  -4   4  -2 2748.21 65.5938   6
  -4   4  -2 2676.60 64.3128   6
  -4   4  -2 2587.08 69.6488   5
   4  -4   2 2611.31 68.7429   5
  -5   4  -2 3742.17 96.2255   5
  -5   4  -2 3834.06 88.8406   6
  -5   4  -2 3815.86 87.7687   6
   5  -4   2 3693.65 96.0654   5
  -6   4  -2 1833.65 54.7951   2
  -6   4  -2 1887.03 45.7738   3
  -7   4  -2 746.621 22.3582   3
  -7   4  -2 767.530 27.4564   4
  -7   4  -2 711.302 25.4512   4
  -7   4  -2 694.514 30.2493   2
  -7   4  -2 767.084 23.1092   3
   7  -4   2 736.219 31.0890   2
   7  -4   2 770.911 18.9062   1
  -8   4  -2 526.232 17.9871   3
  -8   4  -2 550.599 23.7727   4
  -8   4  -2 563.988 18.8884   3
   8  -4   2 553.758 27.8441   2
   8  -4   2 557.704 15.6324   1
  -9   4  -2 1300.19 35.5319   3
  -9   4  -2 1285.76 43.3361   4
  -9   4  -2 1299.07 35.0065   3
   9  -4   2 1318.82 49.9913   2
   9  -4   2 1310.78 32.3351   1
 -10   4  -2 435.643 22.5390   4
 -10   4  -2 388.761 14.9273   3
  10  -4   2 409.927 13.8618   1
  10  -4   2 377.333 25.6323   2
 -11   4  -2 110.283 14.2027   4
 -11   4  -2 96.4198 6.52893   3
  11  -4   2 99.5174 6.39867   1
  11  -4   2 108.111 16.8278   2
 -12   4  -2 143.378 7.61677   3
 -12   4  -2 136.600 22.4771   4
  12  -4   2 142.564 8.14700   1
  12  -4   2 159.517 22.6886   2
  11   3  -2 561.844 36.5896   2
  11   3  -2 585.839 23.7889   1
 -11  -3   2 567.908 27.3058   4
  10   3  -2 1083.21 28.6428   3
  10   3  -2 1115.53 35.0872   1
  10   3  -2 1064.89 50.0559   2
 -10  -3   2 1087.52 39.1601   4
 -10  -3   2 1085.59 28.2594   3
   9   3  -2 710.828 21.5163   3
   9   3  -2 722.142 25.5188   1
   9   3  -2 762.606 38.5487   2
  -9  -3   2 803.058 30.2303   4
  -9  -3   2 718.661 21.2060   3
   8   3  -2 894.773 25.2578   3
   8   3  -2 880.261 28.3188   1
   8   3  -2 919.779 40.7044   2
  -8  -3   2 937.838 32.1666   4
  -8  -3   2 873.626 24.5632   3
   7   3  -2 1223.91 32.3671   3
   7   3  -2 1259.80 47.0918   2
   7   3  -2 1250.80 34.8621   1
  -7  -3   2 1246.77 32.0788   3
  -7  -3   2 1288.73 38.6149   4
   6   3  -2 1320.45 39.3784   4
   6   3  -2 1279.42 45.3270   2
  -6  -3   2 1316.99 34.2472   1
  -6  -3   2 1405.81 38.9289   4
   5   3  -2 634.960 19.5587   1
   5   3  -2 611.225 26.2296   2
   5   3  -2 634.680 22.0784   4
   5   3  -2 681.803 19.0506   3
  -5  -3   2 617.295 18.6503   1
  -5  -3   2 636.251 21.5153   4
  -5  -3   2 644.586 18.5460   3
  -5  -3   2 622.559 24.1687   2
   4   3  -2 512.422 17.9458   4
   4   3  -2 528.616 17.1509   3
   4   3  -2 537.689 21.7278   2
  -4  -3   2 476.542 15.1139   3
  -4  -3   2 509.941 19.6483   2
  -4  -3   2 499.332 17.2199   4
   3   3  -2 674.419 22.9215   2
   3   3  -2 674.182 20.2212   4
   3   3  -2 695.582 18.7864   3
  -3  -3   2 649.341 18.4178   3
  -3  -3   2 664.128 21.5430   2
  -3  -3   2 649.084 18.0257   1
   2   3  -2 14.7763 2.13437   1
   2   3  -2 22.8525 3.14856   3
   2   3  -2 21.5928 3.57879   4
   2   3  -2 17.0699 2.98799   2
  -2  -3   2 18.0097 2.39674   1
  -2  -3   2 16.9337 2.42100   3
  -2  -3   2 19.0167 3.13451   2
  -2  -3   2 22.1966 3.09938   4
  -1  -3   2 643.066 17.4071   2
   0   3  -2 1379.40 31.9263   5
   0  -3   2 1352.95 31.8376   5
   0  -3   2 1328.10 34.2991   6
  -1   3  -2 262.543 6.91368   1
  -1   3  -2 263.885 8.51692   2
  -1   3  -2 261.244 8.52515   4
  -1   3  -2 264.387 8.76485   2
   1  -3   2 293.459 8.94613   4
   1  -3   2 260.850 6.94567   1
  -2   3  -2 0.98134 0.87160   2
  -2   3  -2 2.03909 1.08562   3
  -2   3  -2 5.52763 1.51307   4
  -2   3  -2 0.88610 0.28696   1
  -2   3  -2 2.71785 1.01414   3
   2  -3   2 0.76025 0.35111   1
   2  -3   2 2.87198 1.18044   2
   2  -3   2 1.55078 0.83571   4
  -3   3  -2 863.646 25.8071   2
  -4   3  -2 4.02796 1.60409   4
  -4   3  -2 3.84744 1.44806   3
  -4   3  -2 -0.4026 0.70328   2
  -4   3  -2 5.87029 1.87106   4
   4  -3   2 4.08094 2.17943   2
   4  -3   2 2.44637 0.65410   1
   4  -3   2 2.48635 1.34826   3
  -5   3  -2 652.786 25.1056   2
  -5   3  -2 674.633 19.9257   3
  -5   3  -2 655.285 21.2278   4
  -5   3  -2 694.112 22.8764   4
  -5   3  -2 638.113 15.4003   1
   5  -3   2 682.659 16.3101   1
   5  -3   2 707.330 25.8987   2
   5  -3   2 647.711 19.4802   3
  -6   3  -2 113.017 8.40791   4
  -6   3  -2 105.378 9.59108   2
  -6   3  -2 101.779 6.35094   3
   6  -3   2 93.2745 9.29752   2
   6  -3   2 102.402 4.62307   1
   6  -3   2 96.0828 6.07113   3
  -7   3  -2 962.946 30.5445   4
  -7   3  -2 964.917 32.0494   4
  -7   3  -2 953.180 26.8899   3
  -7   3  -2 936.432 35.6194   2
   7  -3   2 963.134 36.7096   2
   7  -3   2 921.379 26.4007   3
   7  -3   2 950.392 23.9685   1
  -8   3  -2 577.032 24.3141   4
  -8   3  -2 587.569 19.2024   3
   8  -3   2 534.093 27.9420   2
   8  -3   2 572.746 16.9450   1
  -9   3  -2 442.329 16.2166   3
  -9   3  -2 457.311 22.2244   4
  -9   3  -2 441.808 15.8695   3
   9  -3   2 472.438 27.3586   2
   9  -3   2 425.246 14.6701   1
 -10   3  -2 299.459 12.5215   3
 -10   3  -2 306.936 13.2165   3
 -10   3  -2 312.001 18.9025   4
  10  -3   2 325.186 12.6799   1
  10  -3   2 311.532 23.4686   2
 -11   3  -2 665.781 30.4920   4
 -11   3  -2 590.112 23.7444   3
 -11   3  -2 613.983 20.0507   3
  11  -3   2 692.270 37.8725   2
  11  -3   2 645.199 20.8698   1
 -12   3  -2 343.129 12.9788   3
 -12   3  -2 403.694 33.2519   4
  12  -3   2 364.774 14.9704   1
  12  -3   2 384.952 29.5002   2
  12   2  -2 -0.9949 1.42619   2
  12   2  -2 2.07163 2.26464   1
 -12  -2   2 1.16691 2.77396   4
  11   2  -2 -0.1905 1.52891   2
  11   2  -2 3.32024 2.70670   1
 -11  -2   2 7.31396 3.96226   4
  10   2  -2 209.794 20.0809   2
  10   2  -2 181.312 11.4898   1
 -10  -2   2 207.741 14.8657   4
   9   2  -2 356.990 26.3118   2
   9   2  -2 361.790 16.0112   1
   9   2  -2 366.674 11.8048   3
  -9  -2   2 428.450 20.8379   4
  -9  -2   2 366.701 11.6578   3
   8   2  -2 499.290 15.0160   3
   8   2  -2 491.399 18.3463   1
   8   2  -2 457.300 27.0974   2
  -8  -2   2 485.282 14.4893   3
  -8  -2   2 496.730 21.7054   4
   7   2  -2 962.784 28.5005   1
   7   2  -2 987.623 39.4046   2
   7   2  -2 978.519 25.2286   3
  -7  -2   2 1033.29 32.6838   4
  -7  -2   2 960.767 24.8332   3
   6   2  -2 536.756 15.1596   3
   6   2  -2 527.119 25.0513   2
   6   2  -2 527.844 17.2830   1
   6   2  -2 521.622 20.4380   4
  -6  -2   2 509.646 19.7849   4
  -6  -2   2 520.716 14.8827   3
  -6  -2   2 484.018 25.1899   2
  -6  -2   2 489.512 16.1088   1
   5   2  -2 2151.80 50.0871   6
   5   2  -2 2049.16 63.1512   5
  -5  -2   2 2070.76 60.0110   5
  -5  -2   2 2178.19 49.7033   6
   4   2  -2 1503.41 46.3531   5
   4   2  -2 1455.87 36.7092   6
  -4  -2   2 1561.84 36.8213   6
  -4  -2   2 1524.82 44.7844   5
   3   2  -2 1701.42 40.0281   6
   3   2  -2 1665.72 46.5590   5
  -3  -2   2 1657.33 48.3164   5
  -3  -2   2 1690.15 39.7412   6
   2   2  -2 954.973 27.5275   5
   2   2  -2 956.052 24.4797   6
  -2  -2   2 988.681 26.8316   5
  -2  -2   2 926.355 24.3609   6
   1   2  -2 70.7292 3.89693   4
   1   2  -2 68.0838 3.30232   1
   1   2  -2 76.6973 3.96479   2
   1   2  -2 76.2581 3.84427   3
  -1  -2   2 63.7971 3.19007   1
  -1  -2   2 73.6709 3.81062   3
  -1  -2   2 89.9041 3.97435   2
  -1  -2   2 79.1736 3.97120   4
   0   2  -2 1383.17 29.1908   5
   0   2  -2 1310.67 32.6334   6
   0  -2   2 1349.95 32.6915   6
   0  -2   2 1342.43 29.1354   5
  -1   2  -2 4147.75 91.0134   6
  -1   2  -2 4172.21 90.5936   6
  -1   2  -2 4097.66 88.6121   5
   1  -2   2 4124.56 90.7511   6
  -2   2  -2 16.2704 2.59894   2
  -2   2  -2 20.3407 2.42751   4
  -2   2  -2 20.6566 2.87798   3
   2  -2   2 15.1856 1.01171   1
   2  -2   2 21.0284 2.62541   4
   2  -2   2 17.9850 2.83630   2
   2  -2   2 23.8715 2.95795   3
  -3   2  -2 3181.70 73.5060   6
  -3   2  -2 3213.02 76.9131   5
   3  -2   2 3205.52 77.3031   5
   3  -2   2 3250.80 73.3228   6
  -4   2  -2 1350.48 38.4662   2
  -5   2  -2 1285.79 34.3060   4
  -5   2  -2 1198.81 37.9582   2
   5  -2   2 1252.17 39.5099   2
  -6   2  -2 1698.91 49.0325   4
  -6   2  -2 1727.35 51.2034   2
   6  -2   2 1712.94 52.5492   2
   6  -2   2 1753.82 42.4850   3
  -7   2  -2 269.207 14.5243   4
  -7   2  -2 276.856 11.3536   3
  -7   2  -2 254.564 13.3651   4
  -7   2  -2 236.348 15.9562   2
   7  -2   2 270.657 17.8732   2
   7  -2   2 248.145 10.7434   3
   7  -2   2 250.366 9.54100   1
  -8   2  -2 434.905 15.6087   3
  -8   2  -2 450.538 20.7664   4
   8  -2   2 436.897 25.1309   2
   8  -2   2 417.865 14.2323   1
   8  -2   2 395.550 14.9799   3
  -9   2  -2 17.3181 5.26578   4
  -9   2  -2 20.0407 4.00156   3
   9  -2   2 20.3039 3.45573   1
   9  -2   2 11.5122 4.93167   2
   9  -2   2 25.6930 4.48651   3
 -10   2  -2 50.3709 8.70173   4
  10  -2   2 46.0305 5.99789   3
  10  -2   2 44.6765 5.45509   1
  10  -2   2 51.4059 10.8958   2
 -11   2  -2 72.4707 11.2783   4
 -11   2  -2 87.1310 6.28289   3
  11  -2   2 93.4030 7.80099   1
  11  -2   2 93.8681 17.5839   2
 -12   2  -2 3.49089 2.04405   3
  12  -2   2 10.5898 7.58380   2
  12  -2   2 8.38102 2.87807   1
  12   1  -2 302.711 16.0640   1
  12   1  -2 313.536 27.3570   2
 -12  -1   2 350.314 21.5799   4
  11   1  -2 170.239 11.1673   1
  11   1  -2 164.913 23.5205   2
 -11  -1   2 180.490 14.6908   4
  10   1  -2 756.910 39.4826   2
  10   1  -2 735.110 25.6212   1
 -10  -1   2 774.020 31.3437   4
   9   1  -2 491.325 29.7431   2
   9   1  -2 511.969 19.1933   1
  -9  -1   2 547.404 27.7119   4
   8   1  -2 875.404 38.3815   2
   8   1  -2 862.768 26.3459   1
  -8  -1   2 865.249 31.0341   4
   7   1  -2 4.58087 2.16452   1
   7   1  -2 5.80802 3.57850   2
   7   1  -2 8.65188 3.88867   4
  -7  -1   2 4.95330 2.63690   2
  -7  -1   2 6.49503 3.07592   4
   6   1  -2 25.5204 5.65748   2
   6   1  -2 34.4935 2.37962   3
   6   1  -2 47.6334 5.46473   1
  -6  -1   2 33.4301 5.63277   4
  -6  -1   2 27.4328 5.22429   2
  -6  -1   2 35.4799 2.36066   3
  -6  -1   2 30.3543 3.64021   1
   5   1  -2 50.4642 2.76540   3
   5   1  -2 49.8519 3.94486   1
   5   1  -2 63.3325 7.66772   4
   5   1  -2 33.0452 5.60003   2
  -5  -1   2 52.4923 2.76151   3
  -5  -1   2 58.6255 5.45689   4
  -5  -1   2 59.5373 8.49740   2
   4   1  -2 678.294 24.4267   2
   4   1  -2 669.678 21.1318   4
  -4  -1   2 713.668 23.8446   2
  -4  -1   2 662.593 18.1603   1
  -4  -1   2 686.355 21.0316   4
   3   1  -2 290.486 9.30464   1
   3   1  -2 274.907 12.4303   2
   3   1  -2 300.211 7.95067   3
   3   1  -2 273.601 10.6516   4
  -3  -1   2 275.885 10.5155   4
  -3  -1   2 278.560 9.01002   1
  -3  -1   2 292.729 12.2497   2
   2   1  -2 292.621 9.90006   4
   2   1  -2 289.110 10.8806   2
  -2  -1   2 294.155 9.80408   4
  -2  -1   2 289.999 8.61057   1
  -2  -1   2 282.120 10.6096   2
   1   1  -2 1048.01 25.3071   5
   1   1  -2 1042.64 24.8444   6
   1   1  -2 1031.04 24.5580   6
  -1  -1   2 1019.50 25.0441   5
   0   1  -2 19.5922 1.29455   1
   0   1  -2 18.5435 1.69603   3
   0   1  -2 18.2885 1.66491   4
   0  -1   2 17.4068 1.63235   3
   0  -1   2 19.0478 1.66125   4
  -1   1  -2 5.29731 0.70751   1
  -1   1  -2 4.25537 1.09332   3
  -1   1  -2 6.47598 1.27514   4
   1  -1   2 3.78721 1.17107   3
   1  -1   2 4.85062 0.68587   1
   1  -1   2 4.69589 1.00798   4
   1  -1   2 9.57330 1.59708   2
  -2   1  -2 2933.70 66.9777   5
  -2   1  -2 2832.88 65.3890   6
   2  -1   2 2886.81 67.1554   5
   2  -1   2 2901.03 65.3078   6
  -3   1  -2 593.426 17.0164   3
  -3   1  -2 619.742 20.0321   2
  -3   1  -2 615.894 17.6106   4
   3  -1   2 609.294 20.4304   2
   3  -1   2 610.074 17.0658   3
  -4   1  -2 1719.48 42.5401   6
  -4   1  -2 1650.01 47.7519   5
   4  -1   2 1651.79 45.0038   6
   4  -1   2 1658.23 48.8802   5
  -5   1  -2 1608.35 46.2404   2
  -6   1  -2 1464.72 43.7267   4
  -6   1  -2 1477.69 45.8113   2
   6  -1   2 1511.22 48.2315   2
  -7   1  -2 2369.80 60.6896   4
   7  -1   2 2312.71 69.7629   2
  -8   1  -2 1304.72 40.9624   4
  -8   1  -2 1295.03 34.4264   3
   8  -1   2 1221.45 34.0208   3
   8  -1   2 1273.62 33.4488   1
  -9   1  -2 553.053 24.8764   4
  -9   1  -2 514.620 18.6731   3
   9  -1   2 493.030 29.6303   2
   9  -1   2 504.000 18.1324   3
   9  -1   2 557.772 18.4043   1
 -10   1  -2 432.383 16.0010   3
 -10   1  -2 438.418 22.6979   4
  10  -1   2 397.734 15.6710   3
  10  -1   2 388.426 16.0001   1
  10  -1   2 409.855 28.2093   2
 -11   1  -2 653.088 21.1765   3
 -11   1  -2 694.631 31.1290   4
  11  -1   2 622.379 21.5186   3
  11  -1   2 620.726 37.6106   2
  11  -1   2 692.455 23.3849   1
 -12   1  -2 619.946 20.0631   3
 -12   1  -2 665.118 33.7035   4
  12  -1   2 629.353 23.2599   1
  12  -1   2 567.644 37.5935   2
  12   0  -2 108.537 8.89836   1
  11   0  -2 571.558 21.7130   1
  11   0  -2 507.901 33.4287   2
 -11   0   2 590.959 27.7372   4
  10   0  -2 634.579 35.2751   2
  10   0  -2 631.224 22.3846   1
 -10   0   2 644.811 28.1813   4
   9   0  -2 506.235 18.4881   1
   9   0  -2 538.894 30.0442   2
  -9   0   2 520.322 23.4152   4
   8   0  -2 1100.79 43.5240   2
   8   0  -2 1102.23 30.8323   1
  -8   0   2 1110.83 36.4093   4
   7   0  -2 783.524 23.1211   1
   7   0  -2 821.316 33.8703   2
   7   0  -2 798.629 27.9155   4
  -7   0   2 823.091 32.3698   2
  -7   0   2 772.874 27.3711   4
   6   0  -2 1929.45 51.1515   4
  -6   0   2 1940.92 56.0171   2
  -5   0   2 1563.84 45.6079   2
   4   0  -2 2711.85 71.1595   5
  -4   0   2 2701.05 70.0873   5
   3   0  -2 1491.38 41.7223   5
  -3   0   2 1480.12 41.2371   5
   2   0  -2 1737.18 43.4619   5
   2   0  -2 1738.76 37.2749   6
  -2   0   2 1716.15 37.2151   6
  -2   0   2 1716.27 43.3621   5
   1   0  -2 1972.39 44.4823   6
   1   0  -2 2065.87 46.6058   5
  -1   0   2 1999.42 46.5883   5
  -1   0   2 2073.25 46.6347   5
  -1   0   2 2042.49 44.5241   6
   0   0  -2 5946.54 125.353   5
   0   0   2 5909.10 125.293   5
  -1   0  -2 1598.23 39.2585   6
  -1   0  -2 1710.84 39.8105   5
   1   0   2 1651.57 39.3084   6
   1   0   2 1728.97 40.0122   5
  -2   0  -2 255.289 9.89497   2
  -2   0  -2 232.018 8.41530   3
  -2   0  -2 228.555 6.39779   1
  -2   0  -2 242.459 8.13671   4
   2   0   2 220.879 8.15259   3
   2   0   2 241.901 8.41582   4
   2   0   2 225.080 9.75826   2
  -3   0  -2 2346.65 55.4034   6
  -3   0  -2 2296.96 58.9656   5
   3   0   2 2359.74 60.6308   5
   3   0   2 2307.82 55.1260   6
  -4   0  -2 516.187 16.8533   4
  -4   0  -2 493.560 13.3472   1
  -4   0  -2 523.865 17.5128   4
  -4   0  -2 508.090 15.9466   3
   4   0   2 535.689 16.0975   3
   4   0   2 518.172 14.0754   1
   4   0   2 539.624 21.1187   2
  -5   0  -2 68.6059 7.07610   2
  -5   0  -2 81.3413 6.43731   4
  -5   0  -2 76.4059 5.25938   3
  -5   0  -2 70.0214 5.73894   4
  -5   0  -2 73.7961 3.83403   1
   5   0   2 76.9866 4.41454   1
   5   0   2 77.1800 5.23931   3
   5   0   2 42.3100 11.0397   2
  -6   0  -2 52.7361 7.38407   4
  -6   0  -2 39.6989 5.02118   3
  -6   0  -2 26.4414 5.47357   2
   6   0   2 34.1649 4.72407   3
   6   0   2 37.0135 3.36317   1
   6   0   2 31.3601 6.37633   2
  -7   0  -2 236.170 13.0820   4
  -7   0  -2 215.517 12.9398   4
  -7   0  -2 227.867 10.5196   3
   7   0   2 228.311 9.85083   1
   7   0   2 220.315 10.3565   3
  -8   0  -2 42.2288 5.71379   3
  -8   0  -2 38.1488 6.62583   4
   8   0   2 36.0013 5.19494   3
   8   0   2 52.0665 11.4700   2
   8   0   2 34.0626 4.51808   1
  -9   0  -2 80.6354 6.33914   3
  -9   0  -2 72.6833 12.0625   4
   9   0   2 55.3981 13.4220   2
   9   0   2 77.8316 6.31934   1
   9   0   2 71.3606 6.10424   3
 -10   0  -2 10.5906 4.38858   4
 -10   0  -2 10.3998 2.96174   3
  10   0   2 19.7984 8.44366   2
  10   0   2 7.62372 2.72837   1
  10   0   2 6.50875 2.33349   3
 -11   0  -2 26.4429 4.53481   3
 -11   0  -2 30.0343 7.92214   4
  11   0   2 23.7762 9.36487   2
  11   0   2 30.1463 5.16485   1
 -12   0  -2 78.4534 12.2646   4
 -12   0  -2 62.3975 5.52445   3
  12   0   2 74.8198 8.96260   1
  12   0   2 68.6056 16.1645   2
  12  -1  -2 144.570 21.4481   2
  12  -1  -2 150.665 10.2586   1
 -12   1   2 169.960 15.2282   4
  11  -1  -2 35.3520 5.45026   1
  11  -1  -2 44.1331 12.0004   2
 -11   1   2 24.7184 6.13763   4
  10  -1  -2 91.4028 16.2068   2
  10  -1  -2 81.9596 6.72181   1
 -10   1   2 92.0425 12.7195   4
   9  -1  -2 70.5246 5.85050   1
   9  -1  -2 76.6931 13.6941   2
  -9   1   2 89.8034 10.7372   4
   8  -1  -2 227.854 10.2862   1
   8  -1  -2 236.631 17.9116   2
  -8   1   2 223.103 13.6200   4
   7  -1  -2 0.70516 1.21233   4
   7  -1  -2 1.58330 2.06194   2
   7  -1  -2 1.63336 1.29861   1
  -7   1   2 4.50550 2.63824   2
  -7   1   2 2.44925 1.87201   4
   6  -1  -2 170.670 7.46940   1
   6  -1  -2 163.668 12.5986   2
  -6   1   2 138.806 11.4322   2
  -6   1   2 164.840 9.91862   4
   5  -1  -2 399.052 18.9895   2
   5  -1  -2 406.739 15.7033   4
   5  -1  -2 413.018 12.4933   1
  -5   1   2 396.363 12.1128   1
  -5   1   2 391.163 15.3176   4
  -5   1   2 411.079 18.9595   2
   4  -1  -2 1008.08 31.3827   2
   4  -1  -2 951.099 27.2888   4
  -4   1   2 1035.68 31.6417   2
   3  -1  -2 577.436 17.3537   4
   3  -1  -2 605.071 20.2174   2
  -3   1   2 598.785 15.1391   1
   1  -1  -2 1554.26 38.1532   5
   1  -1  -2 1507.57 34.9527   6
  -1   1   2 1508.69 34.9673   6
  -1   1   2 1529.44 37.7722   5
   0  -1  -2 602.974 18.0114   5
   0  -1  -2 607.979 16.9825   6
   0   1   2 609.985 16.9879   6
   0   1   2 614.080 18.1197   5
  -1  -1  -2 2965.39 67.7282   6
  -1  -1  -2 2966.22 69.2838   5
   1   1   2 3043.12 69.6058   5
   1   1   2 3022.59 67.6240   6
  -2  -1  -2 5803.08 129.614   6
  -2  -1  -2 5983.57 132.481   5
   2   1   2 5895.88 129.748   6
   2   1   2 6175.54 133.918   5
  -3  -1  -2 2949.66 69.1372   6
  -3  -1  -2 2914.06 73.0731   5
   3   1   2 2961.86 69.4124   6
   3   1   2 2981.06 74.8330   5
  -4  -1  -2 1861.14 46.8636   6
   4   1   2 1767.14 46.4374   6
  -5  -1  -2 1211.53 38.5586   2
  -5  -1  -2 1314.60 34.7340   4
  -5  -1  -2 1246.72 35.1586   4
   5   1   2 1207.31 32.7334   3
   5   1   2 1262.42 41.4795   2
  -6  -1  -2 1572.34 48.6805   2
   6   1   2 1579.64 40.9238   3
   6   1   2 1628.06 52.3677   2
  -7  -1  -2 1146.46 32.3479   3
  -7  -1  -2 1178.33 36.5011   4
   7   1   2 1145.07 44.4831   2
   7   1   2 1163.19 31.1759   1
   7   1   2 1124.32 32.2341   3
  -8  -1  -2 1450.72 39.9124   3
  -8  -1  -2 1546.85 46.0136   4
   8   1   2 1492.88 55.5688   2
   8   1   2 1432.38 39.8166   3
   8   1   2 1494.97 39.4127   1
  -9  -1  -2 1428.06 39.4714   3
   9   1   2 1493.93 58.2071   2
   9   1   2 1500.31 40.1857   1
   9   1   2 1377.92 41.6336   3
 -10  -1  -2 667.529 22.9256   3
 -10  -1  -2 697.887 29.8729   4
  10   1   2 676.378 23.5225   3
  10   1   2 685.918 24.0317   1
  10   1   2 698.073 39.1038   2
 -11  -1  -2 489.225 18.4848   3
 -11  -1  -2 493.316 25.7045   4
  11   1   2 515.702 20.8568   1
  11   1   2 456.678 33.4585   2
 -12  -1  -2 352.868 22.2868   4
 -12  -1  -2 346.256 16.4042   3
  12   1   2 374.525 17.9038   1
  12   1   2 361.156 30.8001   2
  13  -2  -2 199.524 11.5595   1
  12  -2  -2 586.832 21.5315   1
  12  -2  -2 624.344 37.9295   2
 -12   2   2 652.940 30.7260   4
  11  -2  -2 794.754 26.4102   1
  11  -2  -2 783.038 41.3815   2
 -11   2   2 909.539 35.2717   4
  10  -2  -2 485.069 29.8421   2
  10  -2  -2 537.061 18.6483   1
 -10   2   2 560.971 25.4056   4
   9  -2  -2 1156.73 46.1674   2
   9  -2  -2 1062.69 30.2949   1
  -9   2   2 1138.72 38.1386   4
   8  -2  -2 1502.11 37.6666   1
   8  -2  -2 1460.78 51.9938   2
  -8   2   2 1512.66 44.8227   4
   7  -2  -2 2313.11 67.4959   2
   7  -2  -2 2173.43 59.1896   4
  -7   2   2 2379.13 67.7121   2
   6  -2  -2 3780.33 101.370   5
  -6   2   2 3820.14 101.163   5
   5  -2  -2 1267.83 40.2165   2
   5  -2  -2 1317.23 35.4603   4
  -5   2   2 1299.97 40.9586   2
   4  -2  -2 631.333 22.8968   2
   4  -2  -2 601.386 18.8471   4
  -4   2   2 598.628 15.6529   1
  -4   2   2 602.064 18.7680   4
  -4   2   2 605.801 22.8181   2
   3  -2  -2 85.0557 6.54221   2
   3  -2  -2 83.6511 3.50077   1
   3  -2  -2 88.0624 3.47868   3
   3  -2  -2 81.7248 4.83234   4
  -3   2   2 80.7401 3.40440   3
  -3   2   2 82.5091 6.68422   2
  -3   2   2 84.0320 3.69469   1
  -3   2   2 82.8378 4.83254   4
   2  -2  -2 91.0710 4.36169   4
   2  -2  -2 95.8949 4.11976   3
   2  -2  -2 94.8620 3.51181   1
  -2   2   2 107.547 4.57972   4
  -2   2   2 92.8765 3.59079   1
  -2   2   2 91.8906 6.30635   2
  -2   2   2 89.3264 4.07085   3
   1  -2  -2 1183.72 32.6749   5
   1  -2  -2 1168.69 29.3046   6
  -1   2   2 1172.22 32.2573   5
  -1   2   2 1198.02 29.5381   6
   0  -2  -2 1630.18 39.2149   6
   0  -2  -2 1603.49 41.3770   5
   0   2   2 1582.71 41.2732   5
   0   2   2 1578.61 39.0870   6
  -1  -2  -2 1315.12 33.5290   6
  -1  -2  -2 1253.15 35.2000   5
   1   2   2 1258.93 33.2691   6
   1   2   2 1244.90 35.4878   5
  -2  -2  -2 766.176 23.5894   2
  -2  -2  -2 732.215 21.0452   3
   2   2   2 769.801 21.3314   3
  -3  -2  -2 2048.76 55.8725   5
  -3  -2  -2 2066.35 52.0109   6
   3   2   2 2030.98 57.2339   5
   3   2   2 2081.49 52.1938   6
  -4  -2  -2 16.6233 3.28525   4
  -4  -2  -2 21.9357 3.99256   4
  -4  -2  -2 12.6431 3.60012   2
  -4  -2  -2 16.2044 3.23531   3
   4   2   2 19.9810 2.97007   1
   4   2   2 19.0706 3.46598   3
   4   2   2 21.0818 5.65169   2
  -5  -2  -2 180.268 9.61424   4
  -5  -2  -2 177.352 9.24252   3
  -5  -2  -2 179.692 7.26623   1
  -5  -2  -2 180.410 10.9129   4
  -5  -2  -2 170.679 12.8393   2
   5   2   2 181.475 8.07920   1
   5   2   2 184.261 13.5786   2
   5   2   2 165.814 9.01087   3
  -6  -2  -2 239.202 12.2477   4
  -6  -2  -2 211.176 11.9363   4
  -6  -2  -2 230.110 14.7111   2
  -6  -2  -2 218.365 12.2904   3
   6   2   2 219.054 9.79679   1
   6   2   2 198.481 10.4364   3
   6   2   2 223.569 16.5162   2
  -7  -2  -2 120.104 9.50183   4
  -7  -2  -2 121.047 8.03990   3
   7   2   2 126.944 7.70008   1
   7   2   2 129.862 8.42252   3
   7   2   2 99.0560 13.5724   2
  -8  -2  -2 38.3849 6.79382   4
  -8  -2  -2 39.3559 5.76485   3
   8   2   2 40.9457 5.43652   1
   8   2   2 33.6351 9.38558   2
  -9  -2  -2 54.8530 9.05568   4
  -9  -2  -2 50.2524 6.72355   3
   9   2   2 46.5392 6.82262   3
   9   2   2 39.0350 9.55345   2
   9   2   2 28.9342 4.79725   1
 -10  -2  -2 315.901 14.8171   3
 -10  -2  -2 305.161 18.8430   4
  10   2   2 324.495 26.5796   2
  10   2   2 326.048 17.6633   3
  10   2   2 352.533 16.1412   1
 -11  -2  -2 401.745 17.0287   3
 -11  -2  -2 423.747 23.3373   4
  11   2   2 391.367 18.4585   1
  11   2   2 426.855 39.3497   2
  13  -3  -2 11.6141 6.24420   2
  13  -3  -2 14.4350 3.64253   1
 -13   3   2 7.67324 4.62738   4
  12  -3  -2 16.9078 7.93761   2
  12  -3  -2 17.3496 3.81261   1
 -12   3   2 16.1837 5.71849   4
  11  -3  -2 19.2461 7.50894   2
  11  -3  -2 26.8902 4.40088   1
 -11   3   2 18.1286 5.71703   4
  10  -3  -2 399.630 14.8564   1
  10  -3  -2 439.436 27.6567   2
 -10   3   2 416.157 21.5149   4
   9  -3  -2 255.971 19.5385   2
   9  -3  -2 237.475 10.1094   1
  -9   3   2 243.005 15.1448   4
   8  -3  -2 676.900 31.3685   2
   8  -3  -2 630.138 18.8149   1
  -8   3   2 685.843 25.9170   4
   7  -3  -2 1023.70 25.9144   1
   7  -3  -2 979.138 32.0932   4
   7  -3  -2 1002.93 38.1539   2
  -7   3   2 1061.74 32.7897   4
  -7   3   2 1044.61 39.4729   2
   6  -3  -2 491.702 13.9004   1
   6  -3  -2 481.289 22.9140   2
   6  -3  -2 489.668 18.5193   4
  -6   3   2 503.475 18.9226   4
  -5   3   2 1980.64 56.5095   2
   4  -3  -2 5242.02 127.079   5
   4  -3  -2 5468.97 115.359   6
  -4   3   2 5406.23 129.233   5
  -4   3   2 5369.66 115.094   6
   3  -3  -2 2946.23 65.8586   6
  -3   3   2 2834.20 74.8527   5
  -3   3   2 3009.23 74.4951   5
  -3   3   2 2944.83 65.8844   6
   2  -3  -2 2218.64 57.9994   5
   2  -3  -2 2250.14 52.2281   6
  -2   3   2 2248.19 52.3820   6
  -2   3   2 2196.23 57.2931   5
   1  -3  -2 209.582 5.79099   4
   1  -3  -2 218.446 8.37568   3
  -1   3   2 212.186 6.32282   1
  -1   3   2 212.571 8.41127   3
  -1   3   2 215.038 10.2174   2
  -1   3   2 224.204 6.25764   4
   0  -3  -2 4923.68 114.202   5
   0  -3  -2 5097.64 111.080   6
   0   3   2 4960.45 114.248   5
  -1  -3  -2 3350.99 80.8068   5
  -1  -3  -2 3290.72 77.4602   6
   1   3   2 3290.51 81.0091   5
   1   3   2 3363.10 77.8583   6
  -2  -3  -2 5780.10 130.561   6
  -2  -3  -2 5750.23 134.278   5
   2   3   2 5970.35 136.328   5
   2   3   2 5936.73 131.241   6
  -3  -3  -2 6656.49 145.472   6
  -3  -3  -2 6402.10 149.999   5
   3   3   2 6421.96 145.616   6
   3   3   2 6531.29 152.868   5
  -4  -3  -2 2671.50 72.5800   5
  -4  -3  -2 2690.65 66.9785   6
   4   3   2 2627.39 67.3996   6
  -5  -3  -2 1708.44 51.9103   2
  -5  -3  -2 1785.77 42.5691   1
  -5  -3  -2 1868.40 46.7032   4
   5   3   2 1867.70 56.8129   2
   5   3   2 1808.27 46.8234   3
  -6  -3  -2 1133.97 32.3645   3
  -6  -3  -2 1082.30 32.8226   4
  -6  -3  -2 1098.01 33.5344   4
   6   3   2 1059.26 42.1561   2
   6   3   2 1094.83 30.3867   1
   6   3   2 1107.08 32.6452   3
  -7  -3  -2 1034.93 33.5381   4
  -7  -3  -2 1014.52 31.1180   3
   7   3   2 1011.87 42.8267   2
   7   3   2 1032.11 29.8581   1
   7   3   2 1001.40 31.3646   3
  -8  -3  -2 784.536 25.9081   3
  -8  -3  -2 729.285 28.2444   4
   8   3   2 775.168 25.0247   1
   8   3   2 717.837 37.9139   2
   8   3   2 737.291 25.8219   3
  -9  -3  -2 456.211 22.0202   4
  -9  -3  -2 447.617 18.6056   3
   9   3   2 450.561 18.6198   1
   9   3   2 425.650 29.6170   2
 -10  -3  -2 426.439 22.2760   4
 -10  -3  -2 407.871 17.8328   3
  10   3   2 366.975 29.3005   2
  10   3   2 401.114 19.0330   1
 -11  -3  -2 135.593 9.54938   3
 -11  -3  -2 139.757 16.4736   4
  11   3   2 136.594 10.6977   1
  11   3   2 98.2524 16.9232   2
  13  -4  -2 516.553 35.3930   2
  13  -4  -2 530.481 18.4023   1
 -13   4   2 500.095 27.9647   4
  12  -4  -2 199.103 20.3304   2
  12  -4  -2 178.607 9.30230   1
 -12   4   2 194.311 15.7200   4
  11  -4  -2 417.553 14.8732   1
  11  -4  -2 440.039 29.3078   2
 -11   4   2 415.506 22.7303   4
  10  -4  -2 444.306 14.6579   1
  10  -4  -2 414.612 27.0736   2
 -10   4   2 412.490 21.4757   4
   9  -4  -2 655.374 32.8018   2
   9  -4  -2 637.469 18.6579   1
  -9   4   2 664.049 26.8251   4
   8  -4  -2 918.019 24.1784   1
   8  -4  -2 939.565 38.4669   2
  -8   4   2 984.125 32.5844   4
   7  -4  -2 168.536 10.5374   4
   7  -4  -2 199.257 7.26348   1
   7  -4  -2 170.468 13.9063   2
  -7   4   2 178.142 11.1486   4
   6  -4  -2 1190.76 34.1131   4
   6  -4  -2 1160.97 40.3082   2
  -6   4   2 1223.26 42.3880   2
  -6   4   2 1193.26 34.5042   4
   5  -4  -2 695.892 22.3029   4
   5  -4  -2 748.483 19.3023   3
   5  -4  -2 731.773 27.7552   2
  -5   4   2 720.090 18.2102   1
  -5   4   2 734.644 22.7593   4
  -5   4   2 720.465 28.7742   2
   4  -4  -2 29.6436 1.95068   1
   4  -4  -2 29.6281 3.53905   3
   4  -4  -2 31.4215 4.34509   4
  -4   4   2 44.6076 7.58980   2
  -4   4   2 31.6709 4.27517   4
  -4   4   2 24.4945 1.98781   1
  -4   4   2 37.8846 7.42901   2
  -4   4   2 26.0518 2.61491   3
   3  -4  -2 181.374 7.31468   4
   3  -4  -2 179.399 7.59672   3
  -3   4   2 180.991 5.87737   1
  -3   4   2 181.090 10.7130   2
  -3   4   2 184.539 11.3969   2
  -3   4   2 176.381 7.29977   4
  -3   4   2 177.215 8.46881   3
   2  -4  -2 458.821 14.2736   3
   2  -4  -2 428.879 17.5805   2
   2  -4  -2 442.533 11.6803   4
  -2   4   2 437.851 14.1101   3
  -2   4   2 434.846 11.6417   4
  -2   4   2 408.674 16.9006   2
  -2   4   2 440.024 11.2468   1
   1  -4  -2 61.0014 4.51094   3
   1  -4  -2 57.9190 5.57639   2
  -1   4   2 54.0599 5.37681   2
  -1   4   2 52.8786 2.66780   1
  -1   4   2 48.7367 4.13584   3
   0  -4  -2 262.831 10.8147   3
   0  -4  -2 255.277 12.5443   2
   0   4   2 273.490 8.24842   1
   0   4   2 286.001 11.3345   3
   0   4   2 292.798 13.2226   2
  -1  -4  -2 716.824 24.4388   2
  -1  -4  -2 716.814 21.8290   3
   1   4   2 747.820 22.2750   3
   1   4   2 700.887 24.6051   2
  -2  -4  -2 219.305 7.70381   1
  -2  -4  -2 236.744 7.89288   4
  -2  -4  -2 226.730 10.5846   3
  -2  -4  -2 227.212 12.4196   2
  -2  -4  -2 217.059 7.89998   4
   2   4   2 229.176 10.7233   3
   2   4   2 205.361 12.4686   2
   2   4   2 223.138 8.25022   1
  -3  -4  -2 275.796 10.1363   4
  -3  -4  -2 264.318 12.1765   3
  -3  -4  -2 250.658 13.9111   2
  -3  -4  -2 283.273 9.40758   1
  -3  -4  -2 266.237 10.2289   4
   3   4   2 270.491 12.2392   3
   3   4   2 247.383 14.8207   2
   3   4   2 264.527 9.85269   1
  -4  -4  -2 1024.55 26.8708   1
  -4  -4  -2 1114.67 29.7762   4
  -4  -4  -2 1067.45 31.2728   3
  -4  -4  -2 1047.90 35.4820   2
  -4  -4  -2 1079.17 29.2199   4
   4   4   2 1069.85 38.0896   2
   4   4   2 1054.52 31.4166   3
  -5  -4  -2 119.910 7.84626   4
  -5  -4  -2 133.763 8.77933   3
  -5  -4  -2 132.866 6.69548   1
  -5  -4  -2 139.619 10.0276   4
  -5  -4  -2 144.842 11.5140   2
   5   4   2 140.702 12.8456   2
   5   4   2 136.695 7.61004   1
   5   4   2 138.163 10.3189   3
  -6  -4  -2 954.144 30.3776   4
  -6  -4  -2 951.148 29.9832   4
  -6  -4  -2 989.937 30.4931   3
   6   4   2 967.992 40.4966   2
   6   4   2 985.509 28.4873   1
   6   4   2 972.682 30.8167   3
  -7  -4  -2 686.774 25.2469   4
  -7  -4  -2 639.499 23.6338   3
   7   4   2 669.778 24.7828   3
   7   4   2 641.285 33.7403   2
   7   4   2 681.566 22.6384   1
  -8  -4  -2 186.504 12.6666   4
  -8  -4  -2 172.024 11.0912   3
   8   4   2 194.411 11.1413   1
   8   4   2 173.322 23.5406   2
  -9  -4  -2 510.932 20.7638   3
  -9  -4  -2 456.205 22.3106   4
   9   4   2 490.840 20.2157   1
   9   4   2 459.611 31.9496   2
 -10  -4  -2 374.091 20.6677   4
 -10  -4  -2 356.730 17.0592   3
  10   4   2 344.783 28.9433   2
  10   4   2 348.971 19.7996   1
 -11  -4  -2 440.968 24.2234   4
  11   4   2 456.778 21.1307   1
  11   4   2 412.389 33.7140   2
  12  -5  -2 142.031 7.40521   1
  12  -5  -2 100.170 17.9616   2
 -12   5   2 165.606 14.5198   4
  11  -5  -2 161.202 7.62017   1
  11  -5  -2 161.260 21.7994   2
 -11   5   2 158.886 13.6204   4
  10  -5  -2 61.7910 11.4046   2
  10  -5  -2 56.8869 4.18489   1
 -10   5   2 70.5675 9.70149   4
   9  -5  -2 123.440 5.88116   1
  -9   5   2 130.271 10.8211   4
   8  -5  -2 1261.70 46.5353   2
   8  -5  -2 1255.57 29.8796   1
  -8   5   2 1313.63 39.7892   4
  -8   5   2 1213.49 29.5752   3
  -8   5   2 1258.80 29.9298   3
   7  -5  -2 1933.58 52.5598   4
   7  -5  -2 2072.81 62.0605   2
   6  -5  -2 2746.48 66.5973   4
  -6   5   2 2738.98 77.5649   2
  -5   5   2 2874.10 78.1779   2
   4  -5  -2 3918.25 88.9297   6
  -4   5   2 3897.05 88.9852   6
  -4   5   2 3777.08 100.711   5
  -4   5   2 3857.74 98.5669   5
  -3   5   2 1612.72 47.1130   2
   2  -5  -2 2731.86 66.7683   6
   2  -5  -2 2752.05 73.2944   5
  -2   5   2 2649.99 66.4283   6
  -2   5   2 2807.53 72.3306   5
   1  -5  -2 1485.79 42.5341   2
   0  -5  -2 3700.16 87.1847   6
   0  -5  -2 3501.33 90.6419   5
   0   5   2 3669.77 91.1543   5
   0   5   2 3644.99 87.1308   6
  -1  -5  -2 991.283 28.5370   3
  -1  -5  -2 1006.53 32.1619   2
   1   5   2 948.689 28.4573   3
   1   5   2 938.287 31.7054   2
  -2  -5  -2 2714.65 68.9721   6
   2   5   2 2620.42 69.0900   6
  -3  -5  -2 1085.08 27.7829   4
  -3  -5  -2 1111.21 32.2847   3
  -3  -5  -2 1055.40 27.2147   1
  -3  -5  -2 1104.58 28.0605   4
   3   5   2 1067.03 32.2894   3
   3   5   2 1063.06 37.5802   2
  -4  -5  -2 447.855 14.4013   1
  -4  -5  -2 487.389 16.2464   4
  -4  -5  -2 446.893 18.1341   3
  -4  -5  -2 454.125 15.7553   4
  -4  -5  -2 422.679 20.8529   2
   4   5   2 445.506 18.4205   3
   4   5   2 485.518 24.0894   2
   4   5   2 475.383 15.8572   1
  -5  -5  -2 1042.72 29.9709   4
  -5  -5  -2 1020.78 31.7998   3
  -5  -5  -2 982.444 26.9380   1
  -5  -5  -2 996.964 29.4102   4
   5   5   2 1040.70 29.0618   1
   5   5   2 985.500 31.9516   3
   5   5   2 983.645 39.7816   2
  -6  -5  -2 331.818 15.1995   4
  -6  -5  -2 332.914 14.9515   4
  -6  -5  -2 319.041 15.5669   3
   6   5   2 322.245 22.3671   2
   6   5   2 343.744 14.4124   1
  -7  -5  -2 176.409 11.5062   4
  -7  -5  -2 171.635 11.3244   3
   7   5   2 175.189 10.4176   1
   7   5   2 174.384 17.3410   2
  -8  -5  -2 149.529 11.3767   4
  -8  -5  -2 161.525 11.1674   3
   8   5   2 158.102 22.1049   2
   8   5   2 167.558 10.7604   1
  -9  -5  -2 88.2036 8.43098   3
  -9  -5  -2 91.0622 11.3731   4
   9   5   2 80.9916 16.7571   2
   9   5   2 97.2167 10.9044   1
 -10  -5  -2 21.1461 6.10338   4
 -10  -5  -2 24.0507 5.73964   3
  10   5   2 35.3608 11.1554   2
  10   5   2 28.2390 6.24358   1
  12  -6  -2 167.118 7.33735   1
 -12   6   2 170.189 14.7928   4
  11  -6  -2 715.312 38.0653   2
  11  -6  -2 686.233 18.8773   1
 -11   6   2 708.231 30.8171   4
  10  -6  -2 346.115 24.4556   2
  10  -6  -2 357.206 11.1494   1
 -10   6   2 370.607 20.0147   4
   9  -6  -2 254.134 8.43463   1
   9  -6  -2 282.479 20.4893   2
  -9   6   2 256.905 9.23162   3
  -9   6   2 254.763 9.00792   3
  -9   6   2 258.919 15.5651   4
   8  -6  -2 300.030 8.93857   1
  -8   6   2 323.433 21.1452   2
  -8   6   2 300.268 11.1853   3
  -8   6   2 302.240 15.8726   4
  -8   6   2 276.173 10.6235   3
   7  -6  -2 213.614 6.70587   1
  -7   6   2 196.427 8.99120   3
  -7   6   2 222.947 9.88998   3
  -7   6   2 221.194 12.3483   4
  -7   6   2 194.819 15.4050   2
  -7   6   2 213.101 11.7940   4
   6  -6  -2 111.781 6.61614   3
  -6   6   2 107.446 7.50282   4
  -6   6   2 112.561 10.8762   2
  -6   6   2 105.602 7.69750   4
  -6   6   2 111.201 6.60939   3
  -6   6   2 132.726 13.1580   2
   5  -6  -2 46.6473 4.35581   3
  -5   6   2 83.9860 11.6793   2
  -5   6   2 54.5914 4.68507   4
  -5   6   2 58.6857 4.82773   3
  -5   6   2 109.701 14.7645   2
  -5   6   2 52.1583 4.79961   4
   4  -6  -2 137.430 7.73938   3
  -4   6   2 141.579 7.10314   4
  -4   6   2 137.540 10.8053   2
  -4   6   2 134.790 11.4580   2
  -4   6   2 141.796 7.99579   3
  -4   6   2 152.530 7.00748   4
   3  -6  -2 239.683 14.5159   2
   3  -6  -2 260.504 11.3521   3
  -3   6   2 232.328 10.8722   3
  -3   6   2 253.154 8.25622   4
  -3   6   2 241.623 8.43293   4
  -3   6   2 237.532 7.17970   1
  -3   6   2 235.006 13.8723   2
   2  -6  -2 590.537 19.7736   3
   2  -6  -2 570.127 23.5839   2
  -2   6   2 583.480 19.8590   3
  -2   6   2 557.267 25.4748   2
  -2   6   2 605.722 15.2594   1
  -2   6   2 596.392 13.9377   4
  -1   6   2 82.8696 14.4458   2
  -1   6   2 51.2105 3.18488   1
  -1   6   2 54.7208 5.22610   3
   0  -6  -2 10.1465 3.24174   2
   0  -6  -2 15.3276 3.71273   3
   0   6   2 13.5390 3.49331   2
   0   6   2 13.9991 2.92854   3
   0   6   2 21.1401 2.84582   1
  -1  -6  -2 201.397 7.57222   1
  -1  -6  -2 176.251 12.0562   2
  -1  -6  -2 205.420 10.9937   3
   1   6   2 214.179 13.4547   2
   1   6   2 210.301 8.24334   1
   1   6   2 195.858 10.8340   3
  -2  -6  -2 1072.01 26.9479   1
  -2  -6  -2 1088.03 32.6039   3
  -2  -6  -2 1072.58 36.1078   2
  -2  -6  -2 1069.10 25.4771   4
   2   6   2 1099.79 28.1360   1
   2   6   2 1086.40 37.4819   2
   2   6   2 1004.36 32.3582   3
  -3  -6  -2 702.469 19.5893   4
  -3  -6  -2 700.262 24.5766   3
  -3  -6  -2 694.597 19.6566   1
  -3  -6  -2 707.714 28.0534   2
  -3  -6  -2 716.713 19.7076   4
   3   6   2 707.834 21.0810   1
   3   6   2 675.152 24.7239   3
   3   6   2 693.352 29.6595   2
  -4  -6  -2 308.244 15.0927   3
  -4  -6  -2 291.301 11.8500   4
  -4  -6  -2 300.946 11.9615   4
  -4  -6  -2 296.593 11.3284   1
   4   6   2 294.606 12.4511   1
   4   6   2 340.357 20.5820   2
  -5  -6  -2 313.410 15.6767   3
  -5  -6  -2 276.553 11.5117   1
  -5  -6  -2 326.844 13.5670   4
  -5  -6  -2 309.386 13.2348   4
   5   6   2 297.009 20.7782   2
   5   6   2 301.130 13.2430   1
  -6  -6  -2 822.521 26.7483   4
  -6  -6  -2 819.473 28.8251   3
  -6  -6  -2 771.965 26.1112   4
   6   6   2 800.656 26.1042   1
   6   6   2 819.506 43.9968   2
  -7  -6  -2 655.263 25.3446   3
  -7  -6  -2 659.138 24.3701   4
   7   6   2 588.278 34.6448   2
   7   6   2 656.921 23.5409   1
  -8  -6  -2 440.099 20.0858   4
   8   6   2 436.374 30.8546   2
   8   6   2 428.694 19.0844   1
  -9  -6  -2 534.490 23.4495   3
  -9  -6  -2 590.485 25.1602   4
   9   6   2 577.941 23.7062   1
 -10  -6  -2 335.279 18.0848   3
 -10  -6  -2 345.051 19.5605   4
  10   6   2 363.762 18.6997   1
  10   6   2 355.144 30.9321   2
  12  -7  -2 711.866 17.8436   1
 -12   7   2 717.616 32.5799   4
 -12   7   2 693.646 40.0078   2
  11  -7  -2 407.043 11.2143   1
 -11   7   2 388.702 27.8112   2
 -11   7   2 388.958 21.8681   4
  10  -7  -2 609.150 15.1820   1
 -10   7   2 581.265 26.2965   4
 -10   7   2 603.226 33.4245   2
  -9   7   2 967.885 42.4757   2
  -9   7   2 1019.23 35.1821   4
  -9   7   2 972.009 26.8203   3
  -9   7   2 1004.36 27.3664   3
  -8   7   2 1182.36 37.1592   4
  -8   7   2 1147.71 31.9594   3
  -8   7   2 1145.77 31.1149   3
  -7   7   2 2112.50 55.8357   4
  -7   7   2 2105.78 65.4471   2
  -7   7   2 2131.66 52.1708   3
  -7   7   2 2100.74 54.6774   4
  -6   7   2 1997.02 60.1613   2
  -6   7   2 1970.82 50.5673   4
  -6   7   2 1962.28 49.5808   4
  -6   7   2 1918.43 49.2177   3
   5  -7  -2 1252.33 37.0138   3
  -5   7   2 1238.94 41.9854   2
  -5   7   2 1217.02 32.2396   4
  -5   7   2 1268.59 33.3317   4
  -5   7   2 1205.26 44.0675   2
  -5   7   2 1219.85 34.2549   3
  -5   7   2 1196.41 27.3311   1
   4  -7  -2 931.475 27.6533   3
  -4   7   2 925.337 24.6599   4
  -4   7   2 916.217 35.5573   2
  -4   7   2 934.664 33.7038   2
  -4   7   2 892.940 21.3753   1
  -4   7   2 960.088 24.5651   4
  -4   7   2 890.712 27.7834   3
   3  -7  -2 1831.92 55.2271   2
  -3   7   2 1894.06 48.5448   3
   2  -7  -2 2410.06 71.1363   2
   1  -7  -2 1176.37 43.3128   2
   1  -7  -2 1035.26 31.8964   3
  -1   7   2 1007.09 25.9943   1
  -1   7   2 1089.66 36.2365   2
   0  -7  -2 1371.08 39.3649   3
   0   7   2 1393.07 44.0043   2
  -1  -7  -2 1304.05 42.5700   2
  -1  -7  -2 1347.41 38.7310   3
   1   7   2 1308.63 43.1074   2
   1   7   2 1319.54 33.1603   1
  -2  -7  -2 411.346 13.2191   1
  -2  -7  -2 407.578 11.1476   4
  -2  -7  -2 372.453 20.0090   2
  -2  -7  -2 384.496 17.4637   3
  -2  -7  -2 417.728 11.2772   4
   2   7   2 423.443 14.4402   1
   2   7   2 390.071 21.1294   2
  -3  -7  -2 747.736 26.6959   3
  -3  -7  -2 733.782 20.0271   4
  -3  -7  -2 736.020 21.2109   1
  -3  -7  -2 754.440 20.6440   4
   3   7   2 728.935 22.5034   1
   3   7   2 756.705 32.4598   2
  -4  -7  -2 83.1171 5.64979   4
  -4  -7  -2 76.0629 5.40479   1
  -4  -7  -2 89.0502 5.86219   4
  -4  -7  -2 94.2488 8.52091   3
   4   7   2 101.914 7.07618   1
   4   7   2 112.032 15.9455   2
  -5  -7  -2 243.046 10.9282   1
  -5  -7  -2 277.259 12.1994   4
  -5  -7  -2 266.484 11.9796   4
  -5  -7  -2 269.508 15.0969   3
   5   7   2 263.508 12.7665   1
   5   7   2 279.217 20.6590   2
  -6  -7  -2 150.983 11.2648   3
  -6  -7  -2 135.746 8.92440   4
  -6  -7  -2 136.641 8.97654   4
   6   7   2 96.8210 14.0023   2
   6   7   2 131.533 9.23315   1
  -7  -7  -2 27.0651 5.37062   4
  -7  -7  -2 17.3938 5.16263   3
   7   7   2 28.0684 5.50499   1
   7   7   2 30.1569 9.74130   2
  -8  -7  -2 33.3018 6.34630   4
  -8  -7  -2 30.6842 6.79074   3
   8   7   2 28.6085 10.2088   2
   8   7   2 26.9029 5.09298   1
  -9  -7  -2 78.4172 10.2235   4
  -9  -7  -2 66.8257 9.56795   3
   9   7   2 70.5559 9.78250   1
   9   7   2 55.8096 12.4609   2
 -12   8   2 16.1384 5.39352   4
 -12   8   2 25.7767 9.43919   2
 -11   8   2 20.4907 5.71532   4
 -11   8   2 20.3252 6.63995   2
 -10   8   2 26.5205 4.25446   3
 -10   8   2 26.4255 3.96976   3
 -10   8   2 29.3666 9.73872   2
 -10   8   2 31.1377 7.04347   4
  -9   8   2 8.76166 3.68230   4
  -9   8   2 8.27855 2.49769   3
  -9   8   2 21.4838 7.57613   2
  -8   8   2 67.8559 5.80532   3
  -8   8   2 76.7888 13.6002   2
  -8   8   2 79.3569 6.71406   3
  -8   8   2 70.3911 8.80563   4
   7  -8  -2 1.72336 1.63714   3
  -7   8   2 0.99587 1.12661   4
  -7   8   2 3.13923 3.46314   2
  -7   8   2 4.64913 2.52926   4
  -7   8   2 1.98836 1.75912   3
   6  -8  -2 77.8219 6.63072   3
  -6   8   2 78.1225 5.89941   4
  -6   8   2 68.6156 11.2114   2
  -6   8   2 76.5973 6.44496   4
  -6   8   2 67.4152 6.25340   3
   5  -8  -2 499.213 18.8489   3
  -5   8   2 501.320 16.7139   4
  -5   8   2 454.832 20.7491   3
  -5   8   2 480.071 12.3548   1
  -5   8   2 487.047 15.6592   4
  -5   8   2 472.200 23.7338   2
   4  -8  -2 147.610 9.44431   3
  -4   8   2 127.599 8.95282   3
  -4   8   2 155.319 6.99429   4
  -4   8   2 151.241 5.55578   1
  -4   8   2 157.323 12.6605   2
  -4   8   2 153.814 6.64621   4
   3  -8  -2 543.785 20.7304   3
   3  -8  -2 536.882 25.5215   2
  -3   8   2 556.623 13.6128   4
  -3   8   2 565.328 14.0615   4
  -3   8   2 527.676 20.6929   3
  -3   8   2 542.164 24.7167   2
  -3   8   2 572.895 15.0017   1
   2  -8  -2 252.353 16.2551   2
   2  -8  -2 246.393 13.1109   3
  -2   8   2 257.230 15.9794   2
  -2   8   2 252.925 13.2881   3
  -2   8   2 254.360 8.83711   1
   1  -8  -2 993.411 31.3664   3
   1  -8  -2 928.144 35.0721   2
  -1   8   2 963.468 34.9469   2
  -1   8   2 944.069 31.5002   3
  -1   8   2 992.215 25.0767   1
   0  -8  -2 672.498 28.1517   2
   0   8   2 671.040 19.3043   1
   0   8   2 652.983 28.0962   2
  -1  -8  -2 1167.71 36.9163   3
  -1  -8  -2 1193.10 29.9934   1
   1   8   2 1190.04 31.3509   1
   1   8   2 1229.12 42.4587   2
  -2  -8  -2 1255.06 39.2962   3
  -2  -8  -2 1270.26 32.2993   1
   2   8   2 1283.42 45.4002   2
   2   8   2 1292.40 34.1042   1
  -3  -8  -2 1133.40 29.5561   4
  -3  -8  -2 1178.87 28.3371   4
  -3  -8  -2 1140.91 30.4886   1
  -3  -8  -2 1124.75 37.1496   3
   3   8   2 1146.80 44.0287   2
   3   8   2 1206.24 32.7972   1
  -4  -8  -2 860.794 25.1063   1
  -4  -8  -2 914.326 31.9510   3
  -4  -8  -2 857.167 23.9778   4
  -4  -8  -2 866.501 24.3029   4
   4   8   2 857.089 38.7165   2
   4   8   2 887.395 27.4925   1
  -5  -8  -2 981.309 35.7106   3
  -5  -8  -2 904.601 27.6632   1
  -5  -8  -2 951.034 28.0646   4
  -5  -8  -2 984.693 27.9973   4
   5   8   2 989.927 30.6143   1
   5   8   2 1035.43 44.2724   2
  -6  -8  -2 297.191 17.1662   3
  -6  -8  -2 284.889 13.5608   4
  -6  -8  -2 318.369 14.0256   4
   6   8   2 303.170 16.8842   1
   6   8   2 308.936 24.2905   2
  -7  -8  -2 526.162 20.4197   4
  -7  -8  -2 469.144 22.9803   3
   7   8   2 497.350 21.2396   1
   7   8   2 489.991 32.8319   2
  -8  -8  -2 244.790 16.0649   3
   8   8   2 214.656 35.7215   2
   8   8   2 269.878 15.4275   1
 -11   9   2 436.170 16.7677   3
 -11   9   2 466.357 23.8493   4
 -10   9   2 477.021 18.2936   3
 -10   9   2 528.185 24.2364   4
 -10   9   2 490.991 30.5921   2
  -9   9   2 937.722 29.9102   3
  -9   9   2 899.357 30.3871   3
  -9   9   2 919.913 41.8661   2
  -9   9   2 983.885 33.8190   4
  -8   9   2 776.029 27.3437   4
  -8   9   2 729.652 24.9494   3
  -8   9   2 667.049 33.8274   2
   7  -9  -2 468.329 18.6911   3
  -7   9   2 470.211 18.7857   4
  -7   9   2 435.167 17.0563   4
  -7   9   2 439.611 18.3147   3
   6  -9  -2 697.338 24.6728   3
  -6   9   2 704.334 21.4224   4
  -6   9   2 689.112 31.3995   2
  -6   9   2 665.420 24.3553   3
   5  -9  -2 992.109 31.7564   3
  -5   9   2 1044.00 26.2811   4
  -5   9   2 946.091 23.1495   1
  -5   9   2 907.023 33.5461   3
  -5   9   2 1017.05 27.3503   4
  -5   9   2 1023.80 38.5003   2
   4  -9  -2 512.282 20.4589   3
  -4   9   2 492.881 14.4082   4
  -4   9   2 486.236 13.5034   4
  -4   9   2 487.205 24.3672   2
  -4   9   2 478.817 13.4933   1
   3  -9  -2 759.893 27.0594   3
  -3   9   2 797.214 32.1882   2
  -3   9   2 767.913 20.1458   1
   2  -9  -2 260.163 14.3593   3
  -2   9   2 292.368 17.7945   2
  -2   9   2 256.710 9.56824   1
   1  -9  -2 43.3407 6.36553   3
  -1   9   2 36.4167 6.83191   2
  -1   9   2 40.2773 3.57435   1
   0  -9  -2 106.616 9.10322   3
   0   9   2 84.5426 5.71282   1
   0   9   2 120.750 16.0458   2
  -1  -9  -2 -0.1082 1.74754   3
   1   9   2 3.90584 1.82002   1
   1   9   2 3.68886 2.93317   2
  -2  -9  -2 58.8478 4.60192   1
  -2  -9  -2 38.3233 6.33508   3
   2   9   2 68.3558 7.31807   1
   2   9   2 50.7580 9.47526   2
  -3  -9  -2 11.5552 1.85483   4
  -3  -9  -2 8.66401 3.83955   3
  -3  -9  -2 9.76547 1.69092   4
  -3  -9  -2 14.0705 2.81105   1
   3   9   2 11.4517 5.24714   2
   3   9   2 6.55110 2.29121   1
  -4  -9  -2 132.303 7.82618   1
  -4  -9  -2 126.453 11.0636   3
  -4  -9  -2 136.920 6.65286   4
  -4  -9  -2 131.405 6.70421   4
   4   9   2 159.339 15.9648   2
   4   9   2 125.590 8.88333   1
  -5  -9  -2 73.9721 6.13581   1
  -5  -9  -2 88.2757 6.11709   4
  -5  -9  -2 81.3496 11.4410   3
   5   9   2 89.3329 16.4775   2
   5   9   2 87.5060 7.70506   1
  -6  -9  -2 64.5459 10.3520   3
  -6  -9  -2 59.8843 5.65306   4
  -6  -9  -2 62.7132 5.73303   4
   6   9   2 71.6981 10.7396   1
   6   9   2 76.6670 16.9679   2
  -7  -9  -2 54.9027 7.21961   4
  -7  -9  -2 51.9883 9.50227   3
   7   9   2 43.9171 12.3148   2
   7   9   2 49.8022 8.26615   1
 -11  10   2 88.3016 14.8104   2
 -11  10   2 64.0826 9.75766   4
 -10  10   2 88.3635 7.78473   3
 -10  10   2 107.107 17.9455   2
 -10  10   2 104.415 12.3708   4
  -9  10   2 73.5022 11.9410   2
  -9  10   2 110.311 9.63793   4
  -9  10   2 99.2483 8.63550   3
   8 -10  -2 243.732 13.4038   3
  -8  10   2 239.366 19.3785   2
  -8  10   2 231.940 13.3927   4
   7 -10  -2 613.561 23.5709   3
  -7  10   2 602.669 20.6294   4
  -7  10   2 634.909 31.4793   2
  -7  10   2 636.851 22.4711   4
   6 -10  -2 547.847 22.3265   3
  -6  10   2 626.794 33.1779   2
  -6  10   2 555.955 19.0250   4
  -6  10   2 522.198 17.3505   4
   5 -10  -2 1048.32 34.3727   3
  -5  10   2 1024.82 26.2090   4
  -5  10   2 998.288 40.0323   2
  -5  10   2 1066.54 27.6917   4
   4 -10  -2 394.625 18.4576   3
  -4  10   2 362.313 9.94157   4
  -4  10   2 361.448 21.4446   2
  -4  10   2 354.247 11.2144   1
  -4  10   2 350.890 10.1202   4
   3 -10  -2 1007.55 33.8170   3
  -3  10   2 1029.54 39.1694   2
  -3  10   2 969.727 25.4818   1
   2 -10  -2 948.009 33.1497   3
  -2  10   2 961.568 25.6568   1
  -2  10   2 974.805 38.4560   2
   1 -10  -2 505.560 22.2616   3
  -1  10   2 481.222 25.4089   2
   0 -10  -2 774.173 30.4655   3
   0  10   2 802.991 34.1729   2
   0  10   2 734.998 22.7753   1
  -1 -10  -2 590.675 25.2760   3
   1  10   2 549.720 28.4131   2
   1  10   2 564.777 19.3325   1
  -2 -10  -2 140.231 11.5647   3
   2  10   2 148.675 14.5643   2
   2  10   2 139.309 8.76668   1
  -3 -10  -2 299.729 17.5255   3
  -3 -10  -2 282.142 12.0912   1
   3  10   2 316.415 22.4294   2
   3  10   2 294.126 14.0218   1
  -4 -10  -2 776.032 30.4688   3
  -4 -10  -2 727.035 22.8614   1
  -4 -10  -2 643.745 18.3855   4
   4  10   2 738.180 25.5346   1
   4  10   2 674.492 36.0659   2
  -5 -10  -2 838.451 28.9731   4
  -5 -10  -2 762.319 31.6385   3
   5  10   2 729.710 39.5256   2
   5  10   2 775.625 27.9604   1
  -6 -10  -2 291.262 18.5917   3
   6  10   2 291.035 25.3833   2
   6  10   2 277.656 15.6943   1
 -10  11   2 287.633 23.7967   2
 -10  11   2 311.057 16.3590   3
 -10  11   2 309.427 17.6468   4
  -9  11   2 285.322 22.4634   2
  -9  11   2 289.999 16.2467   3
  -9  11   2 276.352 15.6794   4
   8 -11  -2 140.322 10.5971   3
  -8  11   2 146.968 19.3263   2
  -8  11   2 127.318 9.59268   4
   7 -11  -2 70.0618 9.48001   3
  -7  11   2 62.7895 7.27117   4
  -7  11   2 59.3943 10.4877   2
  -7  11   2 57.5877 9.26792   4
   6 -11  -2 14.8642 4.47387   3
  -6  11   2 16.2766 3.24751   4
  -6  11   2 18.3959 6.53652   2
  -6  11   2 18.0201 3.03152   4
   5 -11  -2 17.2192 5.05202   3
  -5  11   2 22.0756 2.81134   4
  -5  11   2 23.2069 7.45686   2
  -5  11   2 24.5953 2.82339   4
   4 -11  -2 13.4322 4.78926   3
  -4  11   2 14.2418 5.44008   2
  -4  11   2 10.8721 2.15676   1
   3 -11  -2 19.6700 5.74451   3
  -3  11   2 21.9903 3.25295   1
   2 -11  -2 29.2823 6.36804   3
  -2  11   2 32.4210 4.31639   1
   1 -11  -2 20.6905 5.86538   3
  -1  11   2 13.1791 2.80768   1
  -1  11   2 16.1914 7.09145   2
   0 -11  -2 18.7394 5.14229   3
   0  11   2 33.9139 4.91188   1
   0  11   2 24.1119 6.55907   2
  -1 -11  -2 1.53331 2.38610   3
   1  11   2 0.81341 1.37442   1
   1  11   2 7.45506 3.74414   2
  -2 -11  -2 102.423 13.0991   3
   2  11   2 91.2660 7.41303   1
   2  11   2 113.988 17.6649   2
  -3 -11  -2 191.176 14.7320   3
   3  11   2 184.217 17.5776   2
   3  11   2 199.817 11.7322   1
  -4 -11  -2 148.747 13.1183   3
   4  11   2 123.793 9.66023   1
   4  11   2 122.157 17.9659   2
  -5 -11  -2 363.774 21.6219   3
   5  11   2 403.763 19.0370   1
   5  11   2 366.512 28.3483   2
  -9  12   2 183.288 32.2781   2
  -9  12   2 223.670 13.5019   4
  -9  12   2 216.207 14.6719   3
   8 -12  -2 432.552 20.9289   3
  -8  12   2 460.680 18.7577   4
  -8  12   2 445.386 28.4124   2
   7 -12  -2 482.925 22.1542   3
  -7  12   2 486.392 28.6934   2
  -7  12   2 477.297 17.5032   4
   6 -12  -2 343.926 18.4057   3
  -6  12   2 321.260 10.9002   4
  -6  12   2 305.564 22.0149   2
  -6  12   2 330.244 11.7034   4
   5 -12  -2 505.820 23.2335   3
  -5  12   2 484.978 27.7197   2
   4 -12  -2 560.854 25.1730   3
  -4  12   2 578.881 30.0435   2
   3 -12  -2 349.850 19.4373   3
  -3  12   2 336.187 22.0234   2
  -3  12   2 336.755 12.5765   1
   2 -12  -2 259.528 16.4622   3
  -2  12   2 262.894 19.6000   2
  -2  12   2 250.275 11.0402   1
   1 -12  -2 518.048 24.6305   3
  -1  12   2 481.531 27.5798   2
  -1  12   2 476.312 17.4336   1
   0 -12  -2 697.206 29.6783   3
   0  12   2 655.795 33.2746   2
   0  12   2 627.565 21.9410   1
  -1 -12  -2 356.668 20.7084   3
   1  12   2 344.388 15.5008   1
   1  12   2 367.953 24.6076   2
  -2 -12  -2 282.184 18.5600   3
   2  12   2 264.639 21.2934   2
   2  12   2 274.280 14.5153   1
  -3 -12  -2 186.435 15.4152   3
   3  12   2 215.158 19.9970   2
  -4 -12  -2 57.9764 10.8432   3
   4  12   2 55.6704 16.8552   2
   8 -13  -2 136.096 11.5811   3
  -8  13   2 103.309 15.2640   2
  -8  13   2 124.770 8.64967   4
   7 -13  -2 70.4982 10.8555   3
  -7  13   2 71.1310 13.9188   2
  -7  13   2 58.8596 6.85484   4
   6 -13  -2 18.9159 5.56454   3
  -6  13   2 15.2044 6.80685   2
   5 -13  -2 52.8683 9.39108   3
  -5  13   2 48.3964 10.4255   2
   4 -13  -2 148.407 13.1066   3
  -4  13   2 196.080 17.5924   2
   3 -13  -2 267.679 17.6747   3
  -3  13   2 275.387 20.7219   2
   2 -13  -2 223.155 16.2206   3
  -2  13   2 205.646 17.9802   2
   1 -13  -2 255.172 17.4892   3
  -1  13   2 247.647 20.0010   2
   0 -13  -2 242.631 17.2237   3
   0  13   2 209.542 18.8118   2
   1  13   2 234.069 20.3528   2
  -2 -13  -2 210.518 16.4576   3
   2  13   2 190.196 19.1761   2
   3  13   2 308.292 25.1775   2
   6 -14  -2 530.120 25.9092   3
  -6  14   2 500.764 34.8366   2
   5 -14  -2 535.797 26.3535   3
  -5  14   2 529.294 31.4201   2
   4 -14  -2 461.797 24.2208   3
  -4  14   2 446.786 28.0980   2
   3 -14  -2 95.5391 19.8725   3
  -3  14   2 110.717 17.5332   2
   2 -14  -2 68.2961 12.2517   3
  -2  14   2 79.8638 13.1785   2
   1 -14  -2 73.7369 11.3725   3
  -1  14   2 65.7165 11.8392   2
   0 -14  -2 57.7870 10.4771   3
  -1  15  -3 449.936 25.4349   2
   1 -15   3 449.932 25.0906   3
  -2  15  -3 268.437 18.8731   2
   2 -15   3 302.502 20.1228   3
  -3  15  -3 253.043 18.0716   2
   3 -15   3 261.787 18.6007   3
  -4  15  -3 442.818 24.8708   2
   4 -15   3 406.033 23.7793   3
  -5  15  -3 373.128 22.7939   2
   5 -15   3 369.765 22.5212   3
   2  14  -3 2.05330 2.66004   2
  -2 -14   3 4.78984 3.45474   3
   1  14  -3 13.1776 5.25325   2
  -1 -14   3 16.9759 6.20241   3
   0  14  -3 40.5291 8.46222   2
   0 -14   3 58.3566 16.2294   3
  -1  14  -3 79.1639 12.1582   2
   1 -14   3 59.0553 10.1432   3
   2 -14   3 190.916 15.1603   3
  -3  14  -3 132.360 18.5843   2
  -3  14  -3 116.532 7.77210   4
   3 -14   3 131.451 12.6045   3
  -4  14  -3 255.068 12.8831   4
  -4  14  -3 229.107 16.7288   2
   4 -14   3 265.205 17.9124   3
  -5  14  -3 308.671 15.1779   4
  -5  14  -3 289.320 19.2635   2
   5 -14   3 310.088 19.5999   3
  -6  14  -3 384.533 18.3503   4
  -6  14  -3 360.934 22.2974   2
  -6  14  -3 410.343 24.0514   3
  -7  14  -3 423.327 20.9083   4
  -7  14  -3 438.758 25.3057   2
  -7  14  -3 463.328 25.7057   3
   4  13  -3 456.357 28.2402   2
  -4 -13   3 468.919 24.7991   3
   3  13  -3 545.323 29.7836   2
  -3 -13   3 542.663 26.8129   3
   1  13  -3 287.687 19.0387   2
  -1 -13   3 231.560 12.1454   4
  -1 -13   3 298.238 18.7350   3
   0  13  -3 328.073 19.8312   2
   0  13  -3 289.551 12.6250   4
   0 -13   3 348.131 20.1685   3
   0 -13   3 336.010 12.4793   4
  -1  13  -3 265.452 17.1700   2
  -1  13  -3 231.109 10.7840   4
   1 -13   3 235.217 10.4992   4
   1 -13   3 248.519 16.9755   3
   1 -13   3 266.273 10.0205   1
  -2  13  -3 233.253 10.7747   4
  -2  13  -3 227.998 15.7461   2
   2 -13   3 232.683 11.2552   4
   2 -13   3 253.295 16.6527   3
  -3  13  -3 288.185 12.3684   4
  -3  13  -3 260.461 17.0276   2
   3 -13   3 292.310 18.2177   3
  -4  13  -3 138.538 8.53979   4
  -4  13  -3 145.293 12.7803   2
  -4  13  -3 142.460 9.44133   4
   4 -13   3 159.656 13.1689   3
  -5  13  -3 26.7691 6.73830   2
  -5  13  -3 27.6848 5.11759   4
  -5  13  -3 23.7001 5.08992   4
   5 -13   3 30.9029 7.38670   3
  -6  13  -3 84.1208 10.0505   4
  -6  13  -3 66.2759 10.9405   2
  -6  13  -3 92.5785 13.2595   3
  -7  13  -3 0.77669 1.53120   4
  -7  13  -3 4.29031 3.81799   2
  -7  13  -3 -0.8426 1.51902   3
  -8  13  -3 -0.4368 1.47897   2
  -8  13  -3 0.74789 1.87956   3
  -8  13  -3 1.81831 1.94244   4
  -9  13  -3 1.18261 1.84961   2
  -9  13  -3 0.67982 2.33862   3
  -9  13  -3 -0.2471 0.89504   4
   5  12  -3 49.7292 10.6450   2
  -5 -12   3 67.9378 11.3012   3
  -5 -12   3 67.2783 7.71873   4
   4  12  -3 147.383 12.6361   1
   4  12  -3 175.664 16.4375   2
  -4 -12   3 185.586 9.95196   4
  -4 -12   3 138.150 12.5935   3
   3  12  -3 127.464 18.5535   2
   3  12  -3 126.249 9.53982   1
   3  12  -3 123.189 10.7883   4
  -3 -12   3 132.507 8.02663   4
  -3 -12   3 143.464 12.4408   3
   2  12  -3 364.759 15.6993   4
   2  12  -3 410.653 23.0355   2
   2  12  -3 389.609 16.9435   1
  -2 -12   3 410.135 21.4842   3
  -2 -12   3 393.044 14.5665   4
   1  12  -3 136.475 8.37042   4
   1  12  -3 140.487 12.5195   2
  -1 -12   3 142.342 12.2742   3
  -1 -12   3 141.378 7.66596   1
   0  12  -3 246.955 11.4050   4
   0  12  -3 257.749 11.8187   1
   0  12  -3 249.217 16.4096   2
   0 -12   3 253.282 10.3250   1
   0 -12   3 271.355 11.1707   4
   0 -12   3 267.130 16.7162   3
  -1  12  -3 459.688 22.3587   2
  -1  12  -3 441.253 16.4087   4
  -1  12  -3 465.891 16.2133   1
   1 -12   3 492.767 16.3953   4
   1 -12   3 478.641 14.6907   1
   1 -12   3 472.533 23.0333   3
  -2  12  -3 478.786 17.2228   4
  -2  12  -3 527.885 23.7875   2
  -2  12  -3 497.339 15.9173   1
   2 -12   3 522.698 14.5108   1
   2 -12   3 461.582 22.8271   3
   2 -12   3 505.056 20.6948   4
  -3  12  -3 608.597 20.3754   4
  -3  12  -3 656.917 27.3696   2
   3 -12   3 605.629 26.7657   3
   3 -12   3 651.039 21.5406   4
  -4  12  -3 499.137 23.9057   2
  -4  12  -3 497.877 18.4908   4
  -4  12  -3 545.967 20.4836   4
   4 -12   3 539.790 24.3731   3
  -5  12  -3 384.044 15.7610   4
  -5  12  -3 366.767 20.4550   2
  -5  12  -3 405.545 17.8658   4
   5 -12   3 385.878 20.4187   3
  -6  12  -3 1169.51 41.9873   3
  -6  12  -3 1164.02 42.3647   2
  -6  12  -3 1179.50 37.8128   4
  -7  12  -3 759.901 29.2832   4
  -7  12  -3 710.695 33.7514   2
  -7  12  -3 763.774 32.0661   3
  -8  12  -3 620.629 28.4390   3
  -8  12  -3 601.244 30.1887   2
  -8  12  -3 606.274 26.8550   4
  -9  12  -3 178.269 14.2494   4
  -9  12  -3 177.774 14.3214   3
  -9  12  -3 174.735 16.3149   2
 -10  12  -3 257.699 20.8764   2
 -10  12  -3 271.268 18.6780   4
 -10  12  -3 263.058 17.6670   3
   6  11  -3 285.632 16.2055   1
   6  11  -3 279.397 22.5865   2
  -6 -11   3 298.036 14.9555   4
  -6 -11   3 262.071 16.8926   3
   5  11  -3 288.338 21.6825   2
   5  11  -3 294.439 15.7755   1
  -5 -11   3 300.026 14.1864   4
  -5 -11   3 272.395 17.1570   3
   4  11  -3 457.745 19.4134   1
  -4 -11   3 400.116 16.5833   1
  -4 -11   3 499.559 18.0024   4
  -4 -11   3 466.156 22.5202   3
   3  11  -3 163.550 14.4054   2
   3  11  -3 185.523 11.0212   1
   3  11  -3 181.727 10.8931   4
  -3 -11   3 194.455 9.91229   1
  -3 -11   3 195.006 13.9035   3
  -3 -11   3 199.469 10.1045   4
   2  11  -3 365.757 15.7366   4
   2  11  -3 399.604 21.8852   2
   2  11  -3 393.221 16.2419   1
  -2 -11   3 407.595 20.4871   3
  -2 -11   3 418.267 15.0020   4
   1  11  -3 237.418 15.5255   2
   1  11  -3 240.041 11.4325   1
   1  11  -3 201.174 10.5983   4
  -1 -11   3 234.756 9.96305   1
  -1 -11   3 235.225 14.9879   3
  -1 -11   3 224.778 12.6940   4
   0  11  -3 196.956 13.4378   2
   0  11  -3 158.510 8.71792   1
   0  11  -3 170.117 9.01942   4
   0 -11   3 173.708 12.8708   3
   0 -11   3 171.029 8.59831   4
   0 -11   3 157.089 11.9786   2
  -1  11  -3 22.8712 5.44338   2
  -1  11  -3 23.6082 3.75655   1
  -1  11  -3 24.6177 4.05418   4
   1 -11   3 28.6269 4.32293   4
   1 -11   3 22.5666 3.04984   1
   1 -11   3 18.5718 5.49199   2
  -2  11  -3 19.2788 3.28214   1
  -2  11  -3 21.9148 3.72191   4
  -2  11  -3 23.5221 5.56093   2
  -2  11  -3 23.7471 6.01147   2
   2 -11   3 24.5656 2.89373   1
   2 -11   3 24.7405 7.17945   3
   2 -11   3 26.9144 4.39697   4
  -3  11  -3 54.6581 4.99954   4
  -3  11  -3 55.7748 8.33939   2
  -3  11  -3 55.1599 9.40136   2
   3 -11   3 67.5179 5.85606   4
   3 -11   3 47.9653 8.38090   3
  -4  11  -3 49.5853 9.07422   2
  -4  11  -3 59.4655 9.08714   2
   4 -11   3 49.2953 7.54730   3
   4 -11   3 67.1110 6.28154   4
  -5  11  -3 116.799 16.6095   3
  -5  11  -3 95.8734 7.13640   4
  -5  11  -3 106.342 8.66454   4
  -5  11  -3 97.9204 9.76657   2
   5 -11   3 88.4770 11.0573   3
  -6  11  -3 3.40131 2.69681   2
  -6  11  -3 3.15464 2.19861   4
  -7  11  -3 45.9772 8.78456   3
  -7  11  -3 50.0889 7.98198   4
  -7  11  -3 63.2064 11.1872   2
  -8  11  -3 185.147 15.7288   2
  -8  11  -3 181.592 13.8026   4
  -8  11  -3 183.012 14.0529   3
  -9  11  -3 224.644 15.6497   3
  -9  11  -3 234.751 18.8877   2
  -9  11  -3 224.326 16.0753   4
 -10  11  -3 223.320 16.9814   4
 -10  11  -3 269.758 20.9900   2
 -10  11  -3 234.917 15.9270   3
   7  10  -3 268.637 15.8132   1
   7  10  -3 253.247 22.0252   2
  -7 -10   3 274.049 16.4041   3
  -7 -10   3 247.831 14.4113   4
   6  10  -3 419.020 27.2712   2
   6  10  -3 408.196 19.4412   1
  -6 -10   3 434.766 18.4927   4
  -6 -10   3 410.008 20.4486   3
   5  10  -3 172.044 11.2231   1
  -5 -10   3 175.700 10.5626   4
  -5 -10   3 159.230 12.1714   3
  -5 -10   3 186.555 10.2790   1
   4  10  -3 564.625 22.6360   4
   4  10  -3 618.092 30.0278   2
   4  10  -3 615.298 22.6106   1
  -4 -10   3 638.141 21.5035   4
  -4 -10   3 612.133 20.6336   1
  -4 -10   3 627.423 25.7597   3
   3  10  -3 747.715 24.8252   1
   3  10  -3 757.904 31.8988   2
   3  10  -3 670.932 27.0817   4
  -3 -10   3 767.923 23.6343   4
  -3 -10   3 790.897 34.2231   3
   2  10  -3 1120.03 31.3460   1
   2  10  -3 995.776 30.8941   4
   2  10  -3 1116.48 38.5928   2
  -2 -10   3 1101.87 29.8551   4
  -2 -10   3 1053.30 36.1164   2
  -2 -10   3 962.556 28.5494   1
  -2 -10   3 1142.62 36.4808   3
   1  10  -3 389.197 19.3736   2
   1  10  -3 380.771 15.0885   4
   1  10  -3 402.592 15.0109   1
  -1 -10   3 397.541 13.6824   1
  -1 -10   3 421.777 14.5575   4
  -1 -10   3 397.577 19.0641   3
  -1 -10   3 369.108 18.4619   2
   0  10  -3 1659.52 41.2611   1
   0  10  -3 1617.60 42.0778   4
   0  10  -3 1627.04 48.2571   2
   0 -10   3 1677.28 39.4710   1
   0 -10   3 1524.72 47.1889   2
   0 -10   3 1607.35 47.9941   3
   0 -10   3 1714.85 41.4411   4
  -1  10  -3 1467.63 38.6193   4
  -1  10  -3 1507.90 37.1729   1
  -1  10  -3 1533.77 44.8100   2
   1 -10   3 1531.11 38.5631   4
   1 -10   3 1492.58 35.5907   1
   1 -10   3 1484.17 45.0088   3
   1 -10   3 1512.30 45.1589   2
  -2  10  -3 1179.03 40.1721   2
  -2  10  -3 1299.06 39.6904   2
  -2  10  -3 1275.83 34.1980   4
  -2  10  -3 1261.56 31.2552   1
   2 -10   3 1351.79 40.7138   3
   2 -10   3 1326.30 30.1657   1
   2 -10   3 1269.78 34.1570   4
  -3  10  -3 1044.78 33.9656   2
  -3  10  -3 969.891 24.0586   1
  -3  10  -3 981.061 28.4439   4
  -3  10  -3 1022.80 36.1858   2
   3 -10   3 999.131 32.6461   4
   3 -10   3 988.200 33.7416   3
   3 -10   3 1034.89 23.1700   1
  -4  10  -3 811.204 32.4609   2
  -4  10  -3 798.469 24.6086   4
  -4  10  -3 822.786 29.7938   2
   4 -10   3 791.689 25.9702   4
   4 -10   3 827.345 29.6128   3
  -5  10  -3 465.266 21.7237   3
  -5  10  -3 444.014 17.1808   4
  -5  10  -3 493.651 19.7327   4
  -5  10  -3 470.328 21.8945   2
  -5  10  -3 451.842 23.8500   2
  -6  10  -3 538.124 22.5137   4
  -6  10  -3 577.577 24.8148   3
  -6  10  -3 556.816 25.5188   2
  -7  10  -3 730.890 28.7648   4
  -7  10  -3 781.375 30.2787   3
  -7  10  -3 796.599 32.9843   2
  -8  10  -3 585.811 25.1833   3
  -8  10  -3 568.208 28.7445   2
  -8  10  -3 513.570 28.0242   4
  -9  10  -3 398.333 24.7594   2
  -9  10  -3 405.431 21.8565   4
  -9  10  -3 384.691 20.2134   3
 -10  10  -3 246.821 20.1381   2
 -10  10  -3 235.588 17.3255   4
 -11  10  -3 90.2414 14.6425   2
 -11  10  -3 122.567 10.6662   3
 -11  10  -3 117.662 15.8134   4
   8   9  -3 150.488 21.1566   2
   8   9  -3 182.556 12.9363   1
  -8  -9   3 187.683 12.8011   3
  -8  -9   3 197.873 13.2834   4
   7   9  -3 281.135 22.6311   2
  -7  -9   3 263.187 15.3312   3
  -7  -9   3 282.807 15.2356   4
   6   9  -3 228.145 19.0947   2
  -6  -9   3 216.365 12.4642   4
  -6  -9   3 198.996 11.1271   1
   5   9  -3 36.3977 9.15879   2
   5   9  -3 46.2107 6.69139   1
  -5  -9   3 28.5154 5.66911   3
  -5  -9   3 30.1621 4.47733   1
  -5  -9   3 36.9611 5.89529   4
   4   9  -3 7.48984 2.96909   4
   4   9  -3 3.54859 1.78539   1
   4   9  -3 7.43675 4.12274   2
  -4  -9   3 4.94610 2.24269   4
  -4  -9   3 3.65433 2.77830   3
  -4  -9   3 5.50653 2.33606   1
   3   9  -3 19.7209 5.78138   2
   3   9  -3 13.3582 3.25332   1
   3   9  -3 15.7844 3.86763   4
  -3  -9   3 11.1373 3.75842   3
  -3  -9   3 17.1037 3.67680   4
  -3  -9   3 11.7453 2.50054   1
  -3  -9   3 15.4367 4.34360   2
   2   9  -3 52.0438 6.24888   4
   2   9  -3 57.9978 5.20758   1
   2   9  -3 60.5384 9.82757   2
  -2  -9   3 43.6216 7.03261   3
  -2  -9   3 59.7928 4.80262   1
   1   9  -3 0.91033 1.03306   4
   1   9  -3 1.33305 1.68142   2
   1   9  -3 1.90633 1.54729   1
  -1  -9   3 1.29395 1.10790   1
  -1  -9   3 1.70083 1.90717   3
  -1  -9   3 2.35706 1.43459   4
  -1  -9   3 0.19258 1.07731   2
   0   9  -3 31.8242 6.92398   2
   0   9  -3 24.5085 4.01261   4
   0  -9   3 20.8112 2.77827   1
   0  -9   3 29.5720 6.15797   2
   0  -9   3 25.3400 5.04365   3
   0  -9   3 34.9748 4.57506   4
  -1   9  -3 2.38117 1.44509   4
  -1   9  -3 1.45430 1.18625   1
  -1   9  -3 0.15626 1.36791   2
   1  -9   3 2.13081 1.57984   2
   1  -9   3 1.42554 1.18368   4
   1  -9   3 0.81401 1.57470   3
   1  -9   3 3.20338 1.21565   1
  -2   9  -3 367.269 13.8371   4
  -2   9  -3 352.452 11.4253   1
  -2   9  -3 369.618 17.7872   2
  -2   9  -3 394.274 17.1296   2
   2  -9   3 388.331 14.2730   4
   2  -9   3 384.197 17.4470   3
   2  -9   3 393.772 10.8797   1
  -3   9  -3 472.684 21.9114   2
  -3   9  -3 516.084 13.4020   1
  -3   9  -3 519.522 17.4628   4
   3  -9   3 543.297 12.7517   1
   3  -9   3 523.775 21.2130   3
   3  -9   3 528.473 18.5926   4
  -4   9  -3 1298.73 35.1050   4
  -4   9  -3 1309.45 40.0817   2
  -4   9  -3 1267.38 42.5068   2
   4  -9   3 1318.24 37.0227   4
   4  -9   3 1386.81 40.3133   3
  -5   9  -3 615.143 20.9725   4
  -5   9  -3 609.874 27.6392   2
  -5   9  -3 659.110 23.7473   4
  -5   9  -3 649.526 25.4872   3
  -5   9  -3 629.679 25.6574   2
  -6   9  -3 275.014 16.7633   2
  -6   9  -3 279.419 15.5753   3
  -6   9  -3 237.577 17.0663   2
  -6   9  -3 265.277 14.4429   4
  -7   9  -3 516.907 25.4197   2
  -7   9  -3 507.028 22.5791   4
  -7   9  -3 520.743 22.7679   3
  -8   9  -3 499.865 23.5051   4
  -8   9  -3 524.569 22.8589   3
  -8   9  -3 507.093 26.6645   2
  -9   9  -3 869.776 38.3901   2
  -9   9  -3 894.649 31.8751   3
  -9   9  -3 828.207 33.8437   4
 -10   9  -3 538.283 27.1042   4
 -10   9  -3 512.858 29.8256   2
 -10   9  -3 560.051 23.5677   3
 -11   9  -3 400.858 27.4409   2
 -11   9  -3 399.025 23.7703   4
 -11   9  -3 392.727 19.0839   3
   9   8  -3 311.586 26.3407   2
   9   8  -3 317.207 17.7516   1
  -9  -8   3 332.000 18.5010   4
  -9  -8   3 352.667 17.3539   3
   8   8  -3 359.168 26.5642   2
   8   8  -3 359.520 18.2435   1
  -8  -8   3 366.209 17.7419   3
  -8  -8   3 387.453 19.1171   4
   7   8  -3 429.464 23.8213   1
   7   8  -3 463.845 29.0119   2
  -7  -8   3 491.574 20.7812   3
  -7  -8   3 499.345 22.1429   4
   6   8  -3 292.184 14.4946   1
   6   8  -3 250.718 19.3544   2
  -6  -8   3 259.474 14.4556   3
  -6  -8   3 273.438 12.8453   1
  -6  -8   3 276.686 14.2343   4
   5   8  -3 619.223 30.1490   2
   5   8  -3 634.704 22.7339   1
  -5  -8   3 655.440 22.7870   4
  -5  -8   3 646.326 24.3061   3
  -5  -8   3 648.061 21.2575   1
   4   8  -3 830.815 26.2337   1
   4   8  -3 850.919 33.9468   2
   4   8  -3 823.955 27.8519   4
  -4  -8   3 824.744 26.1319   4
  -4  -8   3 829.923 24.8190   1
  -4  -8   3 818.262 30.3363   2
  -4  -8   3 861.996 28.8149   3
   3   8  -3 445.686 17.6500   4
   3   8  -3 471.287 16.9254   1
   3   8  -3 478.332 22.3157   2
  -3  -8   3 451.686 15.5963   1
  -3  -8   3 460.087 16.6527   4
  -3  -8   3 444.772 19.1083   3
   2   8  -3 2045.78 56.7622   3
   2   8  -3 2002.28 48.9682   1
   2   8  -3 1969.83 50.2635   4
  -2  -8   3 2022.28 47.7181   1
  -2  -8   3 1934.99 53.3945   2
   1   8  -3 2115.07 52.3237   4
   1   8  -3 2101.04 56.4742   3
  -1  -8   3 2218.18 55.9787   2
   0   8  -3 799.919 26.1355   2
   0   8  -3 766.377 23.0707   4
   0   8  -3 803.243 26.9326   3
   0   8  -3 776.155 21.7592   1
   0  -8   3 821.645 22.7913   4
   0  -8   3 783.649 20.8166   1
   0  -8   3 767.386 26.4386   3
   0  -8   3 791.464 26.0107   2
  -1   8  -3 1708.55 40.4010   1
  -1   8  -3 1714.62 47.4540   3
  -1   8  -3 1742.68 42.9823   4
   1  -8   3 1768.88 46.8585   2
  -2   8  -3 735.919 21.8063   4
  -2   8  -3 731.716 18.6161   1
  -2   8  -3 747.874 25.6500   3
  -2   8  -3 722.980 25.7750   2
  -2   8  -3 744.320 24.6235   2
   2  -8   3 736.449 22.0465   4
   2  -8   3 758.956 18.0752   1
   2  -8   3 698.904 24.7807   3
  -3   8  -3 786.349 23.3561   4
  -3   8  -3 813.273 26.7642   2
  -3   8  -3 811.740 27.4713   3
  -3   8  -3 778.433 28.2621   2
   3  -8   3 848.796 27.4765   3
   3  -8   3 830.087 18.4454   1
   3  -8   3 828.925 24.8126   4
  -4   8  -3 531.537 21.5084   3
  -4   8  -3 524.438 20.6958   3
  -4   8  -3 541.749 21.6576   2
  -4   8  -3 539.914 17.8878   4
  -4   8  -3 528.732 23.1665   2
   4  -8   3 537.988 20.6556   3
   4  -8   3 559.708 19.5814   4
  -5   8  -3 442.773 18.6567   3
  -5   8  -3 456.900 17.0925   4
  -5   8  -3 448.485 21.9922   2
  -5   8  -3 438.304 19.3904   3
  -5   8  -3 466.710 20.6462   2
   5  -8   3 468.586 18.6195   4
  -6   8  -3 120.209 10.6336   2
  -6   8  -3 131.322 8.53006   4
  -6   8  -3 124.322 11.7218   2
  -6   8  -3 124.356 9.12874   3
  -6   8  -3 140.974 10.2991   3
  -6   8  -3 125.225 9.55408   4
  -7   8  -3 33.2053 6.51329   3
  -7   8  -3 34.6038 6.50958   4
  -7   8  -3 32.5797 7.12812   2
  -7   8  -3 27.8048 5.60834   3
  -8   8  -3 27.8582 6.23374   3
  -8   8  -3 26.5607 6.84184   2
  -8   8  -3 25.7846 6.43800   4
   8  -8   3 24.5251 6.35061   2
  -9   8  -3 339.513 19.7245   4
  -9   8  -3 332.024 16.8019   3
 -10   8  -3 1.51789 2.55415   4
 -10   8  -3 2.09116 1.96699   3
  10  -8   3 1.79501 3.17737   2
 -11   8  -3 4.78393 2.73659   3
 -11   8  -3 9.67654 4.78779   4
  11  -8   3 3.31020 3.40923   2
 -12   8  -3 3.96541 3.30359   4
 -12   8  -3 1.88826 1.76419   3
  12  -8   3 7.73585 5.90273   2
  10   7  -3 87.3396 19.1650   2
  10   7  -3 76.4044 13.2207   1
 -10  -7   3 72.1077 10.7384   4
 -10  -7   3 66.2816 6.72217   3
   9   7  -3 86.9518 16.4372   2
   9   7  -3 85.7776 9.63088   1
  -9  -7   3 100.408 8.30546   3
  -9  -7   3 105.940 10.1082   4
   8   7  -3 53.4648 13.1264   2
   8   7  -3 42.2508 6.86848   1
  -8  -7   3 47.0680 7.64139   4
  -8  -7   3 59.1553 7.75752   3
   7   7  -3 3.53218 3.88885   2
  -7  -7   3 2.39220 2.33501   4
  -7  -7   3 5.38523 2.85754   3
   6   7  -3 86.4980 14.2892   2
  -6  -7   3 90.5438 7.71723   3
  -6  -7   3 92.6199 7.91579   4
  -6  -7   3 76.4386 6.29250   1
   5   7  -3 131.349 16.4270   2
   5   7  -3 91.1789 7.16335   1
   5   7  -3 80.9633 7.55355   4
   5   7  -3 87.0663 7.67100   3
  -5  -7   3 100.655 8.06399   3
  -5  -7   3 84.9254 6.34131   1
  -5  -7   3 133.213 17.5970   2
  -5  -7   3 110.994 8.12809   4
   4   7  -3 29.9259 6.31533   2
   4   7  -3 20.5332 3.66381   1
   4   7  -3 33.5180 5.89147   3
  -4  -7   3 25.2546 4.42716   4
  -4  -7   3 29.9004 4.44426   1
  -4  -7   3 41.3348 6.70427   3
  -4  -7   3 39.4000 6.82551   2
   3   7  -3 3.12772 1.90509   3
   3   7  -3 5.43664 3.16155   2
   3   7  -3 4.52045 1.94117   1
   3   7  -3 5.40785 2.17102   4
  -3  -7   3 7.65526 2.32264   1
  -3  -7   3 5.61656 2.68791   3
  -3  -7   3 5.79221 2.57652   4
  -3  -7   3 8.53517 3.26820   2
   2   7  -3 73.1203 5.80383   4
   2   7  -3 78.0588 5.40915   1
   2   7  -3 75.0588 7.17208   2
   2   7  -3 79.7736 6.92495   3
  -2  -7   3 76.9127 6.65965   2
  -2  -7   3 74.4658 6.59640   3
  -2  -7   3 82.2057 5.17019   1
  -2  -7   3 76.0410 5.50339   4
   1   7  -3 756.438 22.7382   4
   1   7  -3 695.358 28.7076   3
   1   7  -3 770.356 21.4962   1
   1   7  -3 814.750 25.5775   2
  -1  -7   3 782.805 25.2740   3
  -1  -7   3 778.560 24.6603   2
  -1  -7   3 765.656 22.0355   4
   0   7  -3 1577.86 42.8880   3
  -1   7  -3 1031.61 29.0959   2
  -1   7  -3 1008.43 27.2738   4
  -1   7  -3 984.600 30.4351   3
  -1   7  -3 985.880 24.8042   1
   1  -7   3 997.842 30.3891   3
   1  -7   3 1030.22 24.3911   1
   1  -7   3 1044.14 29.7710   2
   1  -7   3 1029.43 27.2764   4
  -2   7  -3 697.155 20.4808   4
  -2   7  -3 699.562 17.4556   1
  -2   7  -3 708.048 22.5881   2
  -2   7  -3 734.419 23.9871   3
  -2   7  -3 705.835 23.8420   2
   2  -7   3 688.792 23.4301   3
   2  -7   3 691.682 16.8757   1
   2  -7   3 694.263 20.9150   4
  -3   7  -3 1201.89 36.4498   2
  -3   7  -3 1199.22 31.5813   4
  -3   7  -3 1196.38 26.3923   1
  -3   7  -3 1210.07 34.8403   3
   3  -7   3 1245.09 33.0239   4
  -4   7  -3 797.469 26.0881   3
  -4   7  -3 716.338 22.2526   4
  -4   7  -3 740.612 27.2896   2
  -4   7  -3 759.950 25.0396   3
  -4   7  -3 732.292 25.6306   2
   4  -7   3 712.828 26.6947   4
  -5   7  -3 888.962 28.4637   3
  -5   7  -3 765.062 28.8628   2
  -5   7  -3 881.576 27.9175   4
  -5   7  -3 800.366 30.7727   2
   5  -7   3 848.312 27.3907   4
  -6   7  -3 1442.75 40.8615   4
  -6   7  -3 1487.24 41.8976   3
  -6   7  -3 1554.96 43.3294   3
  -6   7  -3 1528.42 43.8635   4
  -6   7  -3 1473.13 52.8801   2
   6  -7   3 1572.12 47.0512   2
  -7   7  -3 1325.35 38.4279   3
  -7   7  -3 1346.92 41.9374   4
  -7   7  -3 1301.56 50.9746   2
  -7   7  -3 1369.14 39.8151   3
   7  -7   3 1328.09 44.7739   2
  -8   7  -3 789.229 26.9384   3
  -8   7  -3 705.421 28.9721   4
  -8   7  -3 766.982 25.9116   3
   8  -7   3 734.467 32.5795   2
  -9   7  -3 859.149 33.8236   4
  -9   7  -3 806.701 27.9673   3
  -9   7  -3 891.766 29.5461   3
   9  -7   3 879.929 38.0779   2
 -10   7  -3 429.555 18.6925   3
 -10   7  -3 438.692 23.7273   4
  10  -7   3 420.380 26.5913   2
 -11   7  -3 346.915 21.7784   4
 -11   7  -3 332.559 16.1308   3
  11  -7   3 354.234 25.4189   2
 -12   7  -3 189.961 11.3138   3
 -12   7  -3 198.614 16.9617   4
  12  -7   3 188.759 36.2103   2
  10   6  -3 447.595 31.8267   2
  10   6  -3 446.299 21.1832   1
 -10  -6   3 424.254 17.2220   3
 -10  -6   3 438.968 22.8246   4
   9   6  -3 843.356 29.6735   1
   9   6  -3 806.878 27.0419   3
   9   6  -3 722.440 40.0786   2
  -9  -6   3 796.489 26.0216   3
  -9  -6   3 771.822 30.7959   4
   8   6  -3 955.795 44.5538   2
   8   6  -3 998.139 31.4143   3
   8   6  -3 1026.19 33.1338   1
  -8  -6   3 991.068 34.7061   4
  -8  -6   3 1037.56 30.9069   3
   7   6  -3 1066.82 33.1113   3
   7   6  -3 1045.97 44.1941   2
   7   6  -3 1129.15 34.3534   1
  -7  -6   3 1077.08 32.4543   3
  -7  -6   3 1111.46 35.3192   4
   6   6  -3 553.955 21.0111   3
   6   6  -3 582.196 29.1019   2
   6   6  -3 571.579 20.7470   1
  -6  -6   3 544.408 19.0022   1
  -6  -6   3 571.042 20.4757   3
  -6  -6   3 581.650 21.8674   4
   5   6  -3 1252.53 44.2287   2
   5   6  -3 1396.50 36.4848   1
   5   6  -3 1304.00 37.1254   3
   5   6  -3 1247.79 38.3401   4
  -5  -6   3 1258.60 36.1771   3
  -5  -6   3 1243.04 40.2335   2
  -5  -6   3 1252.65 34.2037   1
  -5  -6   3 1384.99 37.5716   4
   4   6  -3 628.997 26.0868   2
   4   6  -3 576.935 21.4486   4
   4   6  -3 606.280 21.3194   3
  -4  -6   3 629.224 20.8593   4
  -4  -6   3 609.695 20.9632   3
  -4  -6   3 596.889 18.9090   1
  -4  -6   3 613.192 23.2048   2
   3   6  -3 457.169 17.5476   3
   3   6  -3 461.964 20.0353   2
   3   6  -3 472.057 15.9084   1
   3   6  -3 448.238 17.0573   4
  -3  -6   3 479.161 18.5944   2
  -3  -6   3 451.090 17.1599   3
  -3  -6   3 467.591 16.3035   4
  -3  -6   3 488.774 15.3515   1
   2   6  -3 1090.08 32.2928   2
   2   6  -3 1048.58 27.8085   1
   2   6  -3 1007.42 29.1577   4
   2   6  -3 1056.22 30.6524   3
  -2  -6   3 1051.96 30.5771   2
  -2  -6   3 1076.84 27.2915   1
   1   6  -3 1425.20 38.1310   3
   1   6  -3 1378.30 35.7092   4
   0   6  -3 3843.91 87.9202   5
   0   6  -3 3752.12 91.0250   6
   0  -6   3 3852.55 87.6099   5
   0  -6   3 3706.32 91.2053   6
  -1   6  -3 1098.39 26.2929   1
   1  -6   3 1119.32 30.0838   2
  -2   6  -3 147.352 5.09032   1
  -2   6  -3 136.249 8.36497   3
  -2   6  -3 155.178 8.75889   2
  -2   6  -3 163.410 8.20759   2
  -2   6  -3 151.192 7.20703   4
   2  -6   3 156.849 5.03127   1
   2  -6   3 153.092 7.65209   4
   2  -6   3 134.143 8.26608   3
  -3   6  -3 424.210 16.0286   2
  -3   6  -3 416.721 15.9830   3
  -3   6  -3 416.897 17.0632   2
  -3   6  -3 408.398 14.1564   4
   3  -6   3 426.030 15.1311   4
  -4   6  -3 74.5954 6.54093   3
  -4   6  -3 78.5127 7.35020   2
  -4   6  -3 68.5049 6.40134   2
  -4   6  -3 67.7843 5.21983   4
  -4   6  -3 81.8262 6.34670   3
   4  -6   3 73.6692 6.04211   4
  -5   6  -3 570.517 23.8414   2
  -5   6  -3 545.743 19.1231   4
  -5   6  -3 562.201 19.8869   3
  -5   6  -3 580.690 20.9628   3
   5  -6   3 569.718 20.8254   4
   5  -6   3 591.992 22.9297   2
  -6   6  -3 7.59251 2.55309   3
  -6   6  -3 9.68980 2.92967   4
  -6   6  -3 8.77966 2.93479   3
  -6   6  -3 12.3646 3.96771   4
  -6   6  -3 11.3126 4.34850   2
   6  -6   3 8.13424 3.22675   2
  -7   6  -3 5.20790 2.33253   3
  -7   6  -3 3.07543 2.47295   2
  -7   6  -3 4.19497 2.46645   4
  -7   6  -3 5.73365 2.67838   3
   7  -6   3 2.29088 2.20752   2
  -8   6  -3 53.9616 7.25687   3
  -8   6  -3 38.7684 7.02452   4
  -8   6  -3 56.8091 8.46853   3
   8  -6   3 46.9488 9.36443   2
  -9   6  -3 245.000 16.1908   4
  -9   6  -3 263.691 13.3765   3
  -9   6  -3 231.840 12.0637   3
   9  -6   3 236.410 18.4335   2
 -10   6  -3 95.7681 12.9679   4
 -10   6  -3 88.5189 7.57514   3
 -10   6  -3 84.7053 7.15014   3
  10  -6   3 69.8076 11.7016   2
 -11   6  -3 6.26759 3.82361   4
 -11   6  -3 4.06949 2.21729   3
  11  -6   3 1.98439 2.81431   2
 -12   6  -3 131.697 17.6127   4
 -12   6  -3 99.4352 7.71340   3
  12  -6   3 103.758 4.84648   1
  12  -6   3 82.2551 15.0743   2
  11   5  -3 -2.1923 1.20044   1
  11   5  -3 -0.8516 1.60162   2
 -11  -5   3 0.24770 2.26181   4
  10   5  -3 12.6315 6.63745   2
  10   5  -3 24.0613 5.79799   1
 -10  -5   3 18.7899 3.59871   3
 -10  -5   3 12.2428 4.33520   4
   9   5  -3 29.1198 6.13900   1
   9   5  -3 32.5519 5.31944   3
   9   5  -3 30.4030 9.78250   2
  -9  -5   3 23.1123 4.09373   3
  -9  -5   3 29.0891 6.13240   4
   8   5  -3 68.4459 8.22467   1
   8   5  -3 106.136 7.50612   3
  -8  -5   3 104.120 7.15956   3
   7   5  -3 454.258 17.2948   3
   7   5  -3 473.083 26.8710   2
   7   5  -3 452.944 18.2667   1
  -7  -5   3 439.704 16.6900   3
  -7  -5   3 429.864 19.4188   4
   6   5  -3 443.042 16.5641   3
   6   5  -3 398.076 23.0723   2
  -6  -5   3 400.351 20.3117   2
  -6  -5   3 450.469 18.4704   4
  -6  -5   3 411.548 15.4859   1
  -6  -5   3 442.958 18.1264   3
   5   5  -3 347.780 14.5619   3
   5   5  -3 364.559 16.6416   4
   5   5  -3 410.748 21.1470   2
  -5  -5   3 371.430 13.8393   1
  -5  -5   3 398.671 16.1777   4
  -5  -5   3 402.049 21.0425   2
  -5  -5   3 386.859 14.7791   3
   4   5  -3 194.750 9.85858   3
   4   5  -3 200.615 13.0786   2
   4   5  -3 189.790 10.5806   4
   4   5  -3 202.553 9.51133   1
  -4  -5   3 201.536 9.83363   3
  -4  -5   3 214.718 11.9144   2
  -4  -5   3 190.861 8.78050   1
  -4  -5   3 215.609 10.5390   4
   3   5  -3 223.148 12.4177   2
   3   5  -3 224.928 10.8105   4
   3   5  -3 210.630 10.1578   3
   3   5  -3 234.195 9.69556   1
  -3  -5   3 226.309 9.11924   1
  -3  -5   3 226.661 11.2773   2
  -3  -5   3 210.758 10.1398   3
  -3  -5   3 212.529 9.92080   4
   2   5  -3 866.596 25.8371   2
   2   5  -3 793.764 23.9603   3
   2   5  -3 809.448 23.6095   4
  -2  -5   3 796.618 21.5834   1
  -2  -5   3 795.581 22.9151   4
  -2  -5   3 797.249 23.8546   3
  -2  -5   3 820.485 24.0854   2
   1   5  -3 2393.73 61.2946   6
   1   5  -3 2499.64 59.8115   5
  -1  -5   3 2462.26 61.7821   6
  -1  -5   3 2462.15 58.7880   5
   0   5  -3 3888.17 92.2183   6
   0   5  -3 4017.97 88.3655   5
   0  -5   3 3940.69 87.9903   5
   0  -5   3 3897.10 92.1812   6
  -1   5  -3 3390.08 77.4756   5
  -1   5  -3 3444.47 81.8686   6
   1  -5   3 3464.36 81.9965   6
  -2   5  -3 3940.33 88.6806   5
  -2   5  -3 3903.33 92.9812   6
  -2   5  -3 3851.80 91.4510   6
  -2   5  -3 3846.04 90.0799   5
   2  -5   3 3941.14 91.9517   6
  -3   5  -3 982.203 26.3344   4
  -3   5  -3 1016.77 28.7246   3
  -3   5  -3 955.229 28.0792   2
  -3   5  -3 979.889 27.8808   3
  -4   5  -3 2623.28 66.2119   6
  -4   5  -3 2556.69 68.1395   5
  -4   5  -3 2638.45 64.9987   6
   4  -5   3 2413.51 65.7838   5
  -6   5  -3 2122.07 53.1892   3
  -6   5  -3 2185.68 61.6564   2
  -6   5  -3 2146.46 54.7251   4
  -7   5  -3 882.606 27.4460   3
  -7   5  -3 872.933 30.5857   4
  -7   5  -3 838.873 26.1868   3
  -7   5  -3 795.212 33.0912   2
   7  -5   3 950.824 35.4197   2
   7  -5   3 879.315 20.4380   1
  -8   5  -3 394.610 19.7926   4
  -8   5  -3 361.368 15.8417   3
  -8   5  -3 367.628 15.3255   3
   8  -5   3 393.914 11.0632   1
   8  -5   3 394.834 22.7777   2
  -9   5  -3 946.912 30.0491   3
  -9   5  -3 977.160 36.6760   4
   9  -5   3 1013.16 24.5545   1
   9  -5   3 990.657 41.5544   2
 -10   5  -3 347.008 20.4746   4
 -10   5  -3 340.836 15.2341   3
 -10   5  -3 314.686 14.3069   3
  10  -5   3 315.239 10.8997   1
  10  -5   3 314.118 23.1373   2
 -11   5  -3 153.489 9.64897   3
 -11   5  -3 181.572 10.5531   3
 -11   5  -3 173.779 14.9025   4
  11  -5   3 201.213 19.3501   2
  11  -5   3 186.154 8.02881   1
 -12   5  -3 207.874 17.1556   4
 -12   5  -3 198.190 10.9917   3
  12  -5   3 219.629 9.29155   1
  12  -5   3 256.583 22.9724   2
  11   4  -3 567.399 38.7913   2
  11   4  -3 607.713 24.9768   1
 -11  -4   3 604.939 30.0550   4
  10   4  -3 454.351 20.1857   1
  10   4  -3 460.549 31.2181   2
 -10  -4   3 431.846 14.6070   3
 -10  -4   3 474.347 23.4443   4
   9   4  -3 657.998 20.5079   3
   9   4  -3 660.361 36.1937   2
   9   4  -3 633.538 24.1543   1
  -9  -4   3 647.284 19.9791   3
  -9  -4   3 680.946 27.7421   4
   8   4  -3 252.421 11.1267   3
   8   4  -3 264.449 20.5032   2
   8   4  -3 254.225 13.1848   1
  -8  -4   3 266.152 15.3374   4
  -8  -4   3 269.636 11.1118   3
   7   4  -3 375.373 23.4346   2
   7   4  -3 411.229 14.9471   3
   7   4  -3 429.716 16.9759   1
  -7  -4   3 418.290 14.7677   3
  -7  -4   3 407.113 18.5498   4
   6   4  -3 420.644 14.8628   3
   6   4  -3 387.163 17.9579   4
   6   4  -3 420.090 22.8136   2
   6   4  -3 405.220 15.8330   1
  -6  -4   3 417.803 17.7837   4
  -6  -4   3 408.234 14.8078   1
  -6  -4   3 406.559 14.4735   3
  -6  -4   3 384.613 19.4100   2
   5   4  -3 1625.02 50.0228   2
  -5  -4   3 1599.55 39.9520   1
  -5  -4   3 1572.28 45.8078   2
   4   4  -3 1402.69 38.4264   4
   4   4  -3 1407.13 35.7973   3
   4   4  -3 1399.26 42.3123   2
  -4  -4   3 1402.66 34.9735   1
  -4  -4   3 1373.13 39.5142   2
   3   4  -3 1187.99 30.7356   3
  -3  -4   3 1155.65 31.2702   4
   2   4  -3 109.527 5.56360   1
   2   4  -3 117.797 6.46734   3
   2   4  -3 97.7452 6.13818   4
   2   4  -3 113.517 7.02582   2
  -2  -4   3 100.825 6.04713   3
  -2  -4   3 122.999 6.69509   2
  -2  -4   3 113.949 6.22368   4
  -2  -4   3 111.079 5.44463   1
   1   4  -3 84.8355 4.41761   1
   1   4  -3 82.0579 5.36712   3
   1   4  -3 89.6661 5.10981   2
   1   4  -3 77.0245 5.05184   4
  -1  -4   3 84.9339 4.71147   2
  -1  -4   3 86.0984 5.06624   4
  -1  -4   3 87.8583 4.38897   1
  -1  -4   3 86.2287 5.46638   3
   0   4  -3 493.435 12.9320   1
   0   4  -3 454.271 15.0995   3
   0   4  -3 490.688 16.2223   4
   0  -4   3 463.888 12.6284   1
   0  -4   3 477.496 14.4045   4
   0  -4   3 447.305 15.0706   3
  -1   4  -3 134.792 6.93633   3
  -1   4  -3 118.934 5.48002   2
  -1   4  -3 121.918 6.01743   4
  -1   4  -3 122.767 5.17648   2
  -1   4  -3 126.654 7.01043   3
  -1   4  -3 120.725 4.47714   1
   1  -4   3 132.205 6.23949   4
   1  -4   3 118.234 6.60579   3
   1  -4   3 118.784 4.45068   1
  -2   4  -3 22.0774 1.42162   1
  -2   4  -3 18.4853 3.10313   2
  -2   4  -3 17.9334 2.87432   2
  -2   4  -3 19.1491 3.43254   3
  -2   4  -3 22.6477 3.22007   4
   2  -4   3 21.6924 3.42742   4
   2  -4   3 18.2649 1.39151   1
  -3   4  -3 254.354 10.0519   4
  -3   4  -3 276.211 10.9315   3
  -3   4  -3 270.507 11.3672   3
  -3   4  -3 265.303 11.7858   2
   3  -4   3 260.457 6.70236   1
   3  -4   3 266.565 10.9164   4
   3  -4   3 250.209 11.2113   2
  -4   4  -3 487.116 16.5252   4
  -4   4  -3 487.489 16.6260   3
  -4   4  -3 519.904 17.5855   3
  -4   4  -3 478.751 19.1470   2
   4  -4   3 485.418 17.4696   4
   4  -4   3 513.683 11.7096   1
   4  -4   3 535.690 11.8154   1
   4  -4   3 502.789 19.3090   2
  -5   4  -3 283.355 15.1340   2
  -5   4  -3 295.134 12.5995   3
  -5   4  -3 292.716 12.0639   3
  -5   4  -3 305.261 13.7918   4
  -5   4  -3 285.304 12.4184   4
   5  -4   3 295.982 7.94428   1
   5  -4   3 271.726 15.0230   2
   5  -4   3 294.523 7.63405   1
  -6   4  -3 146.903 9.93272   4
  -6   4  -3 139.496 8.44585   3
  -6   4  -3 136.870 8.75494   4
  -6   4  -3 149.189 8.30003   3
  -6   4  -3 136.312 11.0272   2
   6  -4   3 134.696 5.14764   1
   6  -4   3 148.370 11.7064   2
  -7   4  -3 720.544 30.3376   2
  -7   4  -3 739.565 23.3121   3
  -7   4  -3 710.805 27.0801   4
   7  -4   3 779.148 31.9189   2
   7  -4   3 762.172 19.0894   1
  -8   4  -3 949.155 28.8281   3
  -8   4  -3 951.395 34.0125   4
  -8   4  -3 931.769 28.1582   3
   8  -4   3 973.778 39.2320   2
   8  -4   3 949.724 24.1581   1
  -9   4  -3 627.403 22.0516   3
  -9   4  -3 645.063 34.5909   4
  -9   4  -3 610.180 21.0639   3
   9  -4   3 627.255 32.0050   2
   9  -4   3 617.453 18.0281   1
 -10   4  -3 332.203 14.7856   3
 -10   4  -3 337.444 20.2225   4
  10  -4   3 312.378 23.5992   2
  10  -4   3 338.366 12.3863   1
 -11   4  -3 387.345 22.6769   4
 -11   4  -3 362.106 15.4031   3
 -11   4  -3 348.901 15.0806   3
  11  -4   3 362.379 13.5923   1
  11  -4   3 378.109 27.1757   2
 -12   4  -3 233.415 18.3522   4
 -12   4  -3 247.567 12.1420   3
  12  -4   3 226.271 22.5175   2
  12  -4   3 263.316 11.4307   1
  11   3  -3 17.5806 7.49440   2
  11   3  -3 19.4931 5.49411   1
 -11  -3   3 14.9747 5.50217   4
  10   3  -3 429.469 19.0922   1
  10   3  -3 397.918 28.5514   2
 -10  -3   3 438.866 22.4732   4
   9   3  -3 799.022 27.2771   1
   9   3  -3 792.028 39.4081   2
  -9  -3   3 811.668 21.4895   3
  -9  -3   3 822.744 31.1775   4
   8   3  -3 277.982 13.4134   1
   8   3  -3 274.834 20.6762   2
   8   3  -3 289.975 10.6137   3
  -8  -3   3 262.509 10.1167   3
  -8  -3   3 271.283 15.3803   4
   7   3  -3 1231.68 45.7727   2
   7   3  -3 1174.37 34.2175   1
   7   3  -3 1241.55 31.1748   3
  -7  -3   3 1247.84 37.9051   4
   6   3  -3 1472.03 44.1409   4
   6   3  -3 1625.93 51.4035   2
   6   3  -3 1608.98 40.8989   1
  -6  -3   3 1573.57 47.5564   2
   5   3  -3 1702.61 46.2853   4
  -5  -3   3 1731.87 48.6117   2
   4   3  -3 1067.22 30.7672   4
   4   3  -3 1069.53 34.0844   2
  -4  -3   3 1051.86 31.9362   2
  -4  -3   3 1061.90 29.9705   4
   3   3  -3 2696.84 63.2631   6
   3   3  -3 2724.01 68.8153   5
  -3  -3   3 2727.08 63.4620   6
  -3  -3   3 2673.24 66.4165   5
   2   3  -3 5254.01 117.253   5
   2   3  -3 5346.82 115.519   6
  -2  -3   3 5233.95 115.565   6
  -2  -3   3 5179.13 115.613   5
   1   3  -3 3705.56 83.6184   6
   1   3  -3 3689.30 81.0472   5
  -1  -3   3 3748.22 83.6423   6
  -1  -3   3 3621.20 80.1665   5
   0   3  -3 1604.83 35.3410   5
   0   3  -3 1669.13 41.5939   6
   0   3  -3 1599.73 40.9640   6
  -1   3  -3 5188.06 114.989   6
  -1   3  -3 4827.77 112.205   6
  -1   3  -3 4981.39 108.079   5
  -1   3  -3 5168.51 107.298   5
  -2   3  -3 2897.16 65.4413   5
  -2   3  -3 2800.92 67.3965   6
   2  -3   3 2752.02 66.6715   6
   2  -3   3 2853.68 65.2825   5
  -3   3  -3 2656.27 64.5332   5
  -3   3  -3 2599.56 63.6881   6
   3  -3   3 2598.11 64.4684   5
   3  -3   3 2594.33 63.3164   6
  -4   3  -3 3425.61 84.3574   5
  -4   3  -3 3423.54 81.0184   6
   4  -3   3 3342.99 84.6715   5
   4  -3   3 3411.49 80.3227   6
  -5   3  -3 769.470 27.2203   2
  -5   3  -3 763.984 22.8909   3
  -5   3  -3 755.669 24.7781   4
  -5   3  -3 753.721 23.4560   4
   5  -3   3 759.544 18.2475   1
   5  -3   3 737.154 22.3276   3
   5  -3   3 715.681 27.1445   2
  -6   3  -3 939.612 34.1096   2
  -6   3  -3 1001.65 31.9025   4
  -6   3  -3 985.886 28.5197   3
  -6   3  -3 1027.53 30.3479   4
   6  -3   3 991.798 35.6003   2
   6  -3   3 1024.87 24.2672   1
   6  -3   3 959.776 27.9478   3
  -7   3  -3 563.300 19.4917   3
  -7   3  -3 594.542 23.3971   4
  -7   3  -3 532.050 25.2388   2
   7  -3   3 518.689 25.9976   2
   7  -3   3 568.039 15.9785   1
   7  -3   3 556.724 18.9864   3
  -8   3  -3 493.847 22.3996   4
  -8   3  -3 480.423 18.1395   3
   8  -3   3 480.182 17.9662   3
   8  -3   3 487.314 15.2259   1
   8  -3   3 506.853 26.8674   2
  -9   3  -3 257.043 24.5812   4
  -9   3  -3 290.620 13.2946   3
   9  -3   3 251.045 12.4393   3
   9  -3   3 307.878 21.7319   2
   9  -3   3 289.138 11.1629   1
 -10   3  -3 5.59128 3.34152   4
 -10   3  -3 0.79604 1.53393   3
  10  -3   3 4.47002 4.83261   2
  10  -3   3 4.64061 1.98869   1
 -11   3  -3 18.3529 4.06198   3
 -11   3  -3 18.0523 4.06404   3
 -11   3  -3 25.4190 7.36118   4
  11  -3   3 11.3743 6.90409   2
  11  -3   3 19.1808 3.87301   1
 -12   3  -3 15.7330 3.82779   3
 -12   3  -3 14.7089 6.08758   4
  12  -3   3 13.3476 3.25188   1
  12   2  -3 160.394 24.6616   2
  12   2  -3 135.817 10.7992   1
 -12  -2   3 149.290 17.3562   4
  11   2  -3 389.264 18.5241   1
  11   2  -3 415.656 30.2282   2
 -11  -2   3 449.917 23.4716   4
  10   2  -3 609.040 23.2504   1
  10   2  -3 575.674 34.2673   2
 -10  -2   3 670.646 28.4576   4
   9   2  -3 399.242 17.1125   1
  -9  -2   3 422.137 20.7581   4
   8   2  -3 55.7475 7.16075   1
   8   2  -3 32.6329 8.71751   2
  -8  -2   3 42.2143 7.13527   4
   7   2  -3 29.9906 4.73877   1
   7   2  -3 31.8513 7.72731   2
   7   2  -3 32.5456 2.66036   3
  -7  -2   3 32.4213 5.66000   4
  -7  -2   3 40.8692 9.21957   2
  -7  -2   3 33.1370 2.67393   3
   6   2  -3 0.48224 0.90931   1
   6   2  -3 1.66911 1.78880   2
   6   2  -3 1.62330 0.91362   3
   6   2  -3 2.81030 1.54698   4
  -6  -2   3 2.49931 1.00022   3
  -6  -2   3 1.95084 1.55447   4
  -6  -2   3 0.19173 0.76760   1
   5   2  -3 3.69351 2.13441   2
   5   2  -3 3.07710 1.47916   1
   5   2  -3 3.81852 1.25234   3
   5   2  -3 1.81352 1.43730   4
  -5  -2   3 6.40994 1.99374   1
  -5  -2   3 7.86409 1.77825   3
  -5  -2   3 6.40158 2.38825   4
  -5  -2   3 5.71130 2.65266   2
   4   2  -3 117.005 7.47740   4
   4   2  -3 123.423 5.29347   3
   4   2  -3 133.000 6.49916   1
   4   2  -3 114.337 8.77246   2
  -4  -2   3 119.065 8.34498   2
  -4  -2   3 124.850 5.36701   3
  -4  -2   3 110.173 5.80453   1
  -4  -2   3 126.449 7.47515   4
   3   2  -3 38.2258 2.79971   3
   3   2  -3 43.8893 3.28340   1
   3   2  -3 29.3179 3.70363   4
   3   2  -3 37.3129 5.17448   2
  -3  -2   3 38.8555 3.03560   1
  -3  -2   3 37.4210 5.12920   2
  -3  -2   3 39.5845 2.84680   3
  -3  -2   3 40.8532 3.79889   4
   2   2  -3 134.992 5.68259   3
   2   2  -3 136.406 6.76538   4
   2   2  -3 141.418 7.14009   2
  -2  -2   3 142.765 6.79664   2
  -2  -2   3 138.571 6.61224   4
  -2  -2   3 145.548 5.92432   3
   1   2  -3 2877.45 65.7478   6
   1   2  -3 2880.00 66.3600   6
   1   2  -3 2927.97 64.2033   5
  -1  -2   3 2991.17 63.8554   5
   0   2  -3 26.5110 2.48097   4
   0   2  -3 25.6012 2.57132   3
   0  -2   3 29.3752 2.62072   3
   0  -2   3 30.0081 2.60513   4
  -1   2  -3 1158.78 27.0374   5
  -1   2  -3 1175.09 31.0654   6
   1  -2   3 1152.49 30.7096   6
  -2   2  -3 763.031 23.6155   6
  -2   2  -3 783.169 22.6901   5
   2  -2   3 808.283 23.1665   5
   2  -2   3 814.984 25.9801   6
  -3   2  -3 559.439 17.4716   3
  -3   2  -3 583.910 17.3070   4
  -3   2  -3 608.856 19.3958   2
   3  -2   3 564.594 17.2977   3
   3  -2   3 579.325 19.6155   2
  -4   2  -3 1704.53 48.6458   5
  -4   2  -3 1736.56 45.4459   6
   4  -2   3 1628.74 44.4169   6
   4  -2   3 1741.69 49.5522   5
  -5   2  -3 1661.41 48.1381   2
  -5   2  -3 1757.49 44.2018   4
  -6   2  -3 1165.88 34.8750   4
  -6   2  -3 1088.18 37.4519   2
  -6   2  -3 1147.60 33.3737   4
   6  -2   3 1179.95 39.9340   2
   6  -2   3 1090.89 30.7836   3
  -7   2  -3 1679.05 53.5260   2
  -7   2  -3 1867.62 50.8756   4
   7  -2   3 1699.31 44.7767   3
   7  -2   3 1811.98 57.0590   2
  -8   2  -3 646.661 26.6361   4
  -8   2  -3 674.864 22.3649   3
   8  -2   3 643.313 19.6155   1
   8  -2   3 694.762 32.6254   2
   8  -2   3 661.807 22.0263   3
  -9   2  -3 634.687 21.5156   3
  -9   2  -3 602.079 38.5727   4
   9  -2   3 587.260 21.0341   3
   9  -2   3 617.026 19.5862   1
   9  -2   3 616.267 32.7853   2
 -10   2  -3 644.643 22.3473   3
 -10   2  -3 651.762 28.9527   4
  10  -2   3 582.041 22.9453   3
  10  -2   3 641.139 20.9352   1
  10  -2   3 664.267 36.0936   2
 -11   2  -3 718.876 32.6238   4
 -11   2  -3 730.109 24.6048   3
  11  -2   3 742.642 24.9954   3
  11  -2   3 787.831 24.8078   1
  11  -2   3 750.329 40.8398   2
 -12   2  -3 716.367 24.0166   3
 -12   2  -3 765.912 35.0891   4
  12  -2   3 743.152 44.8952   2
  12  -2   3 757.694 25.5530   1
  12   1  -3 213.137 22.5390   2
  12   1  -3 213.488 13.2058   1
 -12  -1   3 211.015 16.5406   4
  11   1  -3 949.763 47.0550   2
  11   1  -3 899.348 30.5354   1
 -11  -1   3 922.507 36.5023   4
  10   1  -3 1067.83 48.1473   2
  10   1  -3 1078.75 33.2191   1
 -10  -1   3 1085.76 38.9445   4
   9   1  -3 701.109 23.6887   1
   9   1  -3 683.841 34.8463   2
  -9  -1   3 680.643 31.1724   4
   8   1  -3 1655.56 56.9305   2
  -8  -1   3 1621.78 47.9614   4
   7   1  -3 877.184 25.6897   1
   7   1  -3 874.748 35.8834   2
  -7  -1   3 940.323 30.1986   4
  -7  -1   3 809.084 32.8974   2
   6   1  -3 735.348 21.4701   1
   6   1  -3 732.209 25.2505   4
   6   1  -3 736.200 29.9321   2
  -6  -1   3 707.378 20.7148   1
  -6  -1   3 716.549 24.6319   4
  -6  -1   3 681.978 27.6493   2
  -5  -1   3 1898.52 52.7377   2
   4   1  -3 1468.29 44.6693   5
   4   1  -3 1477.54 33.2129   6
   4   1  -3 1469.28 33.4284   6
  -4  -1   3 1409.17 43.0437   5
   3   1  -3 4293.93 99.6001   5
   3   1  -3 4290.19 91.1431   6
   3   1  -3 4225.86 90.8554   6
  -3  -1   3 4186.52 98.5181   5
   2   1  -3 977.011 27.8289   5
   2   1  -3 988.201 24.7125   6
   2   1  -3 1008.88 24.3849   6
  -2  -1   3 986.639 27.6939   5
   1   1  -3 129.839 5.35369   3
   1   1  -3 126.352 5.75221   4
   1   1  -3 128.575 4.86602   1
   1   1  -3 130.216 5.31330   2
  -1  -1   3 128.646 5.70683   4
  -1  -1   3 135.022 5.41641   2
  -1  -1   3 124.252 5.18674   3
   0   1  -3 7010.19 148.020   5
   0   1  -3 7172.89 151.566   6
   0  -1   3 7121.05 148.106   5
   0  -1   3 7019.53 151.151   6
  -1   1  -3 73.4977 3.87451   4
  -1   1  -3 69.3528 2.87529   1
  -1   1  -3 73.7154 3.80612   2
   1  -1   3 71.1030 3.83091   2
   1  -1   3 71.8515 4.25537   3
   1  -1   3 70.9323 3.89996   4
  -2   1  -3 3110.35 71.7427   5
  -2   1  -3 3079.41 72.0839   6
   2  -1   3 3115.04 71.8095   6
   2  -1   3 3128.04 72.6693   5
  -3   1  -3 2719.00 64.5394   6
  -3   1  -3 2742.64 69.4184   5
   3  -1   3 2652.61 67.3796   5
   3  -1   3 2672.16 64.2814   6
  -4   1  -3 1149.38 34.8298   2
   4  -1   3 1255.11 36.9353   2
  -5   1  -3 17.1190 3.88111   2
  -5   1  -3 21.3144 3.46015   4
  -5   1  -3 24.6009 2.02866   1
  -5   1  -3 25.5796 4.82059   4
  -5   1  -3 37.7270 5.36863   3
   5  -1   3 28.7288 4.21416   3
   5  -1   3 28.2705 2.50898   1
   5  -1   3 33.0033 6.45155   2
  -6   1  -3 40.5529 6.66120   4
  -6   1  -3 36.8648 5.75513   4
  -6   1  -3 31.6188 4.80286   3
   6  -1   3 36.4030 4.97856   3
   6  -1   3 35.1400 3.17284   1
   6  -1   3 48.5471 9.51674   2
  -7   1  -3 96.0896 7.10764   3
  -7   1  -3 107.746 9.03523   4
   7  -1   3 93.7773 13.6395   2
   7  -1   3 94.6366 5.79752   1
   7  -1   3 92.7804 6.84972   3
  -8   1  -3 88.4298 11.3169   4
  -8   1  -3 69.4315 6.23615   3
   8  -1   3 70.6619 5.38613   1
   8  -1   3 93.2187 15.3178   2
   8  -1   3 78.5784 6.50821   3
  -9   1  -3 211.399 11.3094   3
  -9   1  -3 227.838 18.0360   4
   9  -1   3 186.294 13.3345   3
   9  -1   3 206.712 10.2107   1
 -10   1  -3 33.7192 5.58617   3
 -10   1  -3 31.5355 7.21480   4
  10  -1   3 29.9425 4.99126   1
  10  -1   3 32.3781 8.93200   2
  10  -1   3 38.3732 6.07677   3
 -11   1  -3 15.0689 4.28053   3
 -11   1  -3 23.9245 6.84456   4
  11  -1   3 13.9833 3.62115   1
  11  -1   3 19.7527 4.51835   3
  11  -1   3 21.9950 9.10891   2
 -12   1  -3 39.4726 5.91389   3
 -12   1  -3 25.4558 6.93911   4
  12  -1   3 34.8271 10.7310   2
  12  -1   3 39.3392 5.99120   1
  12   0  -3 183.342 11.7313   1
  12   0  -3 139.303 30.8884   2
 -12   0   3 178.273 16.3458   4
  11   0  -3 69.3784 8.39617   1
  11   0  -3 53.9282 11.6705   2
 -11   0   3 55.1291 9.28402   4
  10   0  -3 49.1451 10.4940   2
  10   0  -3 37.6430 5.46484   1
 -10   0   3 59.9656 10.3085   4
   9   0  -3 7.04667 4.58110   2
   9   0  -3 9.87545 3.00917   1
  -9   0   3 10.3669 3.80251   4
   8   0  -3 148.447 19.0074   2
   8   0  -3 112.309 7.26792   1
  -8   0   3 108.152 9.40848   4
   7   0  -3 112.809 15.1186   2
   7   0  -3 81.2204 10.4028   4
   7   0  -3 91.1611 6.87538   1
  -7   0   3 95.0459 9.85467   2
  -7   0   3 89.4090 7.92216   4
   6   0  -3 175.287 8.14925   1
   6   0  -3 164.395 12.1508   4
   6   0  -3 173.913 13.0907   2
  -6   0   3 155.610 11.8978   2
  -6   0   3 176.533 10.4049   4
   5   0  -3 238.043 11.6258   4
   5   0  -3 245.478 9.35846   1
   5   0  -3 238.347 14.1561   2
  -5   0   3 221.409 8.81481   1
  -5   0   3 249.037 14.0050   2
   4   0  -3 11.2383 2.15074   1
   4   0  -3 9.04374 2.69236   2
   4   0  -3 18.1301 3.62362   4
  -4   0   3 8.36740 1.56721   1
  -4   0   3 12.4398 2.82497   4
  -4   0   3 11.5556 3.40507   2
   3   0  -3 92.9304 5.67316   4
   3   0  -3 95.5857 4.60584   1
   3   0  -3 104.221 3.41423   3
   3   0  -3 96.4253 6.86314   2
  -3   0   3 90.2019 5.49198   4
  -3   0   3 95.3328 4.63564   1
  -3   0   3 103.371 8.03739   2
   2   0  -3 125.723 4.73548   3
   2   0  -3 126.897 5.99353   4
   2   0  -3 130.342 6.94076   2
   2   0  -3 130.400 5.64156   1
  -2   0   3 130.494 5.95885   4
  -2   0   3 136.649 5.26930   1
  -2   0   3 134.682 4.79141   3
  -2   0   3 147.342 7.34195   2
   1   0  -3 298.929 8.51028   1
   1   0  -3 293.559 10.1110   2
   1   0  -3 298.497 9.54142   4
   1   0  -3 289.159 9.09939   3
  -1   0   3 305.541 10.1976   2
  -1   0   3 306.310 9.56020   4
  -1   0   3 315.866 10.3673   2
  -1   0   3 311.053 9.22814   3
   0   0  -3 1515.02 36.2677   5
   0   0  -3 1475.90 36.6825   6
   0   0   3 1512.46 36.3373   5
   0   0   3 1507.80 36.7096   6
  -1   0  -3 5722.73 124.045   5
  -1   0  -3 5627.87 124.156   6
   1   0   3 5730.63 124.193   5
  -2   0  -3 1352.31 35.0999   6
  -2   0  -3 1341.27 35.8008   5
   2   0   3 1154.07 38.2436   6
   2   0   3 1362.50 36.4193   5
  -3   0  -3 989.418 29.2245   2
   3   0   3 1020.98 27.0025   3
   3   0   3 1006.77 30.4406   2
  -4   0  -3 2385.86 60.3560   6
  -4   0  -3 2398.84 64.6305   5
   4   0   3 2474.72 60.6790   6
   4   0   3 2452.64 66.9213   5
  -5   0  -3 1598.33 46.9555   2
  -5   0  -3 1656.08 42.4819   4
  -6   0  -3 1661.03 50.3720   2
  -6   0  -3 1669.81 45.1615   4
   6   0   3 1671.07 43.5655   3
   6   0   3 1766.02 54.6068   2
  -7   0  -3 784.228 28.0382   4
  -7   0  -3 775.969 24.5780   3
   7   0   3 759.110 22.2304   1
   7   0   3 731.766 23.9572   3
   7   0   3 744.307 33.5515   2
  -8   0  -3 1151.02 38.4540   4
  -8   0  -3 1202.12 34.2018   3
   8   0   3 1109.10 33.5446   3
   8   0   3 1219.22 47.8249   2
   8   0   3 1141.72 31.7542   1
  -9   0  -3 640.832 22.1873   3
  -9   0  -3 646.978 27.9006   4
   9   0   3 617.953 21.0206   1
   9   0   3 583.363 21.7303   3
   9   0   3 580.924 33.2317   2
 -10   0  -3 508.786 25.1614   4
 -10   0  -3 504.499 19.6927   3
  10   0   3 480.200 19.5409   3
  10   0   3 500.387 19.1550   1
  10   0   3 510.288 32.5620   2
 -11   0  -3 529.219 20.1611   3
 -11   0  -3 512.251 26.7042   4
  11   0   3 501.792 34.2096   2
  11   0   3 542.744 20.8835   1
 -12   0  -3 174.859 15.7172   4
 -12   0  -3 182.391 10.6437   3
  12   0   3 149.618 20.8813   2
  12   0   3 179.788 11.6867   1
  12  -1  -3 627.405 23.2144   1
  12  -1  -3 611.008 39.9764   2
 -12   1   3 728.932 45.0302   4
  11  -1  -3 644.286 36.7995   2
  11  -1  -3 626.403 22.4293   1
 -11   1   3 613.487 28.5796   4
  10  -1  -3 1000.19 45.4044   2
  10  -1  -3 1006.96 30.4244   1
 -10   1   3 1058.98 37.8961   4
   9  -1  -3 1060.37 44.5789   2
   9  -1  -3 1082.17 30.7781   1
  -9   1   3 1069.58 36.9640   4
   8  -1  -3 2017.55 64.4553   2
   7  -1  -3 1851.97 56.7287   2
   7  -1  -3 1660.71 48.4599   4
  -7   1   3 1805.83 49.2406   4
  -7   1   3 1702.54 54.7311   2
   5  -1  -3 2239.50 64.4389   5
  -5   1   3 2208.62 64.2518   5
   4  -1  -3 962.756 27.3026   4
  -4   1   3 983.455 31.3472   2
   3  -1  -3 664.255 21.9074   2
   3  -1  -3 613.272 18.6588   4
  -3   1   3 681.424 22.4731   2
   2  -1  -3 3985.59 87.6603   6
  -2   1   3 4070.75 87.7925   6
  -2   1   3 4145.25 93.6985   5
  -2   1   3 4054.09 93.7893   5
   1  -1  -3 3118.81 71.1579   5
   1  -1  -3 3012.25 68.1160   6
  -1   1   3 3007.29 67.9720   6
  -1   1   3 3026.98 70.5192   5
   0  -1  -3 1496.15 38.8544   5
   0   1   3 1501.87 37.5812   6
   0   1   3 1543.35 39.1358   5
  -1  -1  -3 207.878 6.91504   4
  -1  -1  -3 210.002 9.26806   2
  -1  -1  -3 214.655 8.53130   3
   1   1   3 195.304 8.19156   3
   1   1   3 201.565 9.22849   2
   1   1   3 198.718 6.92157   4
  -2  -1  -3 3.29472 1.60327   2
  -2  -1  -3 1.25731 0.77937   4
  -2  -1  -3 5.85413 1.97211   3
   2   1   3 5.01643 1.20636   1
   2   1   3 3.05620 1.19634   4
   2   1   3 1.91150 1.35760   2
   2   1   3 2.37223 1.12260   3
  -3  -1  -3 50.4177 3.86031   4
  -3  -1  -3 50.6655 4.39278   3
  -3  -1  -3 55.5938 3.02461   1
  -3  -1  -3 40.8020 5.54905   2
  -3  -1  -3 58.6478 4.44313   4
   3   1   3 52.6708 4.42162   3
   3   1   3 59.3319 7.96113   2
   3   1   3 49.0386 3.09250   1
  -4  -1  -3 72.4049 6.76439   2
  -4  -1  -3 74.3463 5.66818   4
  -4  -1  -3 67.9809 5.42703   3
  -4  -1  -3 65.0710 3.63125   1
  -4  -1  -3 82.2740 5.55760   4
   4   1   3 79.8537 10.4546   2
   4   1   3 78.4479 4.36646   1
   4   1   3 63.3443 5.14602   3
  -5  -1  -3 11.1602 3.07313   4
  -5  -1  -3 4.94878 1.22588   1
  -5  -1  -3 11.9045 3.13923   3
  -5  -1  -3 9.16096 2.40675   4
  -5  -1  -3 9.17577 3.59508   2
   5   1   3 8.42314 3.20129   2
   5   1   3 12.4070 2.48740   1
   5   1   3 6.89520 2.40815   3
  -6  -1  -3 23.2546 5.90387   2
  -6  -1  -3 29.8688 4.88928   3
  -6  -1  -3 24.4429 5.07199   4
  -6  -1  -3 19.2857 3.77285   4
   6   1   3 25.1506 4.56798   3
   6   1   3 16.9472 2.78044   1
   6   1   3 26.5580 7.28881   2
  -7  -1  -3 28.6593 4.94237   3
  -7  -1  -3 23.0118 5.42483   4
   7   1   3 30.5075 5.31627   3
   7   1   3 20.1480 3.45419   1
   7   1   3 31.2790 9.03133   2
  -8  -1  -3 113.663 10.0907   4
  -8  -1  -3 113.979 8.46433   3
   8   1   3 140.854 19.2925   2
   8   1   3 127.692 8.86333   3
   8   1   3 123.578 7.89944   1
  -9  -1  -3 57.1415 7.78608   3
  -9  -1  -3 61.4515 9.68845   4
   9   1   3 53.4516 6.45938   1
   9   1   3 49.1571 10.7542   2
   9   1   3 56.8309 7.54754   3
 -10  -1  -3 377.047 21.1623   4
 -10  -1  -3 357.516 16.1192   3
  10   1   3 328.915 26.5121   2
  10   1   3 328.916 15.6938   1
 -11  -1  -3 263.962 13.7989   3
 -11  -1  -3 263.791 18.4165   4
  11   1   3 267.104 25.0303   2
  11   1   3 270.273 14.3798   1
  12  -2  -3 30.4288 5.28906   1
  12  -2  -3 28.4474 8.93664   2
 -12   2   3 20.7837 6.18462   4
  11  -2  -3 4.73791 2.39010   1
  11  -2  -3 0.04338 2.72115   2
 -11   2   3 6.06840 4.09959   4
  10  -2  -3 99.4481 7.00574   1
  10  -2  -3 111.484 16.8268   2
 -10   2   3 86.1228 11.0350   4
   9  -2  -3 58.5205 11.3696   2
   9  -2  -3 55.2860 4.91280   1
  -9   2   3 56.7034 9.12265   4
   8  -2  -3 272.533 19.1058   2
   8  -2  -3 265.028 10.8366   1
  -8   2   3 253.028 14.5755   4
   7  -2  -3 851.344 23.5428   1
   7  -2  -3 868.340 34.8486   2
  -7   2   3 899.862 29.3766   4
  -7   2   3 847.756 34.8353   2
   6  -2  -3 770.382 30.0291   2
   6  -2  -3 740.454 20.0963   1
   6  -2  -3 711.267 24.5541   4
  -6   2   3 697.302 24.1687   4
  -6   2   3 760.538 33.4135   2
  -5   2   3 2229.50 61.5769   2
   4  -2  -3 3513.00 74.8635   6
   4  -2  -3 3421.03 88.5103   5
  -4   2   3 3519.02 74.9966   6
  -4   2   3 3533.38 89.6588   5
   3  -2  -3 3396.25 75.3252   6
  -3   2   3 3490.02 85.8976   5
  -3   2   3 3516.96 84.8970   5
  -3   2   3 3415.00 75.4933   6
   2  -2  -3 3398.18 75.8519   6
   2  -2  -3 3316.14 82.3447   5
  -2   2   3 3441.78 82.7649   5
  -2   2   3 3479.17 81.8892   5
  -2   2   3 3428.23 76.0461   6
   1  -2  -3 1042.32 27.8519   6
  -1   2   3 1023.52 30.5465   5
  -1   2   3 1045.00 27.9655   6
   0  -2  -3 289.831 8.12484   4
   0  -2  -3 252.007 11.3683   2
   0  -2  -3 286.876 10.3443   3
   0   2   3 286.631 11.8360   2
   0   2   3 279.035 11.2907   3
  -1  -2  -3 3108.08 74.8613   5
  -1  -2  -3 2966.71 71.9295   6
   1   2   3 3029.92 74.8232   5
   1   2   3 3156.38 72.4234   6
  -2  -2  -3 4556.42 109.388   5
  -2  -2  -3 4684.56 106.554   6
   2   2   3 4614.01 106.224   6
   2   2   3 4828.64 110.958   5
  -3  -2  -3 5481.05 130.841   5
  -3  -2  -3 5584.72 126.920   6
   3   2   3 5523.68 126.897   6
   3   2   3 5818.32 134.195   5
  -4  -2  -3 1002.65 32.9886   2
  -4  -2  -3 1027.17 27.9347   4
  -4  -2  -3 1018.52 29.3693   3
  -4  -2  -3 1043.27 29.0423   4
  -4  -2  -3 981.831 24.9580   1
   4   2   3 998.181 35.0085   2
   4   2   3 1040.68 29.5400   3
  -5  -2  -3 901.095 28.3561   4
  -5  -2  -3 976.796 28.4481   3
  -5  -2  -3 875.524 23.3320   1
  -5  -2  -3 866.870 31.8019   2
  -5  -2  -3 943.699 27.3321   4
   5   2   3 879.777 27.4534   3
   5   2   3 953.980 35.6570   2
  -6  -2  -3 1808.95 48.4261   4
  -6  -2  -3 1737.50 46.7739   4
   6   2   3 1726.54 57.1349   2
   6   2   3 1744.60 46.4438   3
  -7  -2  -3 814.759 26.5132   3
  -7  -2  -3 797.932 28.4231   4
   7   2   3 800.124 24.3175   1
   7   2   3 781.852 26.2821   3
   7   2   3 768.799 35.9466   2
  -8  -2  -3 799.188 30.2103   4
  -8  -2  -3 826.036 27.2302   3
   8   2   3 771.043 26.9860   3
   8   2   3 833.106 25.9137   1
  -9  -2  -3 787.887 26.7058   3
  -9  -2  -3 783.111 30.9165   4
   9   2   3 693.024 38.6457   2
   9   2   3 739.926 25.3196   1
 -10  -2  -3 193.720 14.8501   4
 -10  -2  -3 185.051 11.6532   3
  10   2   3 219.117 21.9796   2
 -11  -2  -3 122.501 9.33465   3
 -11  -2  -3 114.712 13.9853   4
  11   2   3 137.880 10.2997   1
  11   2   3 92.8940 17.4730   2
  12  -3  -3 560.907 20.0703   1
  12  -3  -3 568.589 35.9026   2
 -12   3   3 613.638 29.3520   4
  11  -3  -3 755.267 23.5574   1
  11  -3  -3 723.862 39.0973   2
 -11   3   3 774.635 32.3925   4
  10  -3  -3 886.493 41.2434   2
  10  -3  -3 819.581 24.7948   1
 -10   3   3 880.495 33.7288   4
   9  -3  -3 417.743 14.5892   1
   9  -3  -3 443.440 26.3149   2
  -9   3   3 407.243 20.2002   4
   8  -3  -3 576.078 28.8235   2
   8  -3  -3 542.285 16.8425   1
  -8   3   3 535.936 22.5832   4
   7  -3  -3 765.715 31.9965   2
   7  -3  -3 727.483 20.3705   1
   7  -3  -3 691.788 25.6267   4
  -7   3   3 765.659 26.4447   4
  -7   3   3 833.772 40.4306   2
   6  -3  -3 247.189 15.8569   2
   6  -3  -3 267.594 12.8613   4
   6  -3  -3 239.383 8.79705   1
  -6   3   3 268.385 12.8390   4
  -6   3   3 261.698 16.7760   2
   5  -3  -3 506.870 13.0901   3
   5  -3  -3 519.406 18.0920   4
   5  -3  -3 496.512 21.9968   2
   5  -3  -3 512.178 14.0704   1
  -5   3   3 497.819 14.5127   1
  -5   3   3 531.498 18.0759   4
  -5   3   3 493.882 22.7342   2
   4  -3  -3 94.6502 4.25433   1
   4  -3  -3 93.5185 4.38530   3
   4  -3  -3 81.0983 5.61744   4
  -4   3   3 97.2371 8.16877   2
  -4   3   3 89.6245 8.29339   2
  -4   3   3 92.3674 4.44336   3
  -4   3   3 81.2752 5.53085   4
  -4   3   3 88.6354 4.43326   1
   3  -3  -3 25.5406 2.01433   1
   3  -3  -3 26.0781 3.21511   4
   3  -3  -3 26.8424 2.52929   3
  -3   3   3 23.4093 2.08062   1
  -3   3   3 26.7333 3.35026   4
  -3   3   3 22.8058 4.90772   2
  -3   3   3 29.9160 5.55741   2
  -3   3   3 26.8498 2.52411   3
   2  -3  -3 1839.44 44.9759   6
   2  -3  -3 1745.97 50.5641   5
  -2   3   3 1889.18 50.7239   5
  -2   3   3 1837.88 45.2033   6
   1  -3  -3 532.062 13.1580   4
   1  -3  -3 543.982 16.2666   3
  -1   3   3 525.861 16.1875   3
  -1   3   3 521.696 13.5818   1
  -1   3   3 526.670 18.9942   2
   0  -3  -3 10.6418 1.30429   4
   0  -3  -3 16.5219 3.11451   3
   0   3   3 18.5496 1.65250   1
   0   3   3 19.1070 1.34673   4
   0   3   3 13.4324 3.62407   2
   0   3   3 11.8359 2.50748   3
  -1  -3  -3 665.685 20.0566   3
  -1  -3  -3 648.268 22.1995   2
   1   3   3 631.601 19.6427   3
   1   3   3 594.245 21.8890   2
  -2  -3  -3 351.960 11.2930   4
  -2  -3  -3 352.676 10.7098   4
  -2  -3  -3 331.576 13.5179   3
  -2  -3  -3 350.523 15.7380   2
   2   3   3 358.316 16.5032   2
   2   3   3 353.995 10.8239   1
  -3  -3  -3 89.5816 5.55774   4
  -3  -3  -3 80.2874 4.96364   4
  -3  -3  -3 76.3709 7.30810   2
  -3  -3  -3 84.9876 4.41910   1
  -3  -3  -3 86.1100 6.46205   3
   3   3   3 91.3564 4.93386   1
   3   3   3 89.5013 6.55332   3
  -4  -3  -3 1096.68 30.9877   3
  -4  -3  -3 1046.98 28.2822   4
  -4  -3  -3 981.058 36.8056   2
  -4  -3  -3 1041.25 29.2815   4
  -4  -3  -3 1007.55 25.8366   1
   4   3   3 1031.15 36.7929   2
   4   3   3 1017.63 30.4147   3
  -5  -3  -3 435.204 16.9566   4
  -5  -3  -3 429.361 16.2082   4
  -5  -3  -3 440.917 17.5486   3
  -5  -3  -3 416.143 20.5711   2
  -5  -3  -3 433.948 13.7392   1
   5   3   3 478.334 24.2362   2
   5   3   3 438.362 14.9332   1
   5   3   3 423.353 17.3637   3
  -6  -3  -3 764.066 26.1578   4
  -6  -3  -3 798.555 26.0830   3
  -6  -3  -3 733.343 24.9957   4
   6   3   3 805.754 35.1709   2
   6   3   3 782.290 23.4013   1
   6   3   3 702.251 25.3389   3
  -7  -3  -3 1047.12 34.3119   4
  -7  -3  -3 1042.17 32.9382   3
   7   3   3 1018.90 32.7169   3
   7   3   3 1039.12 30.5794   1
   7   3   3 1134.63 45.8567   2
  -8  -3  -3 409.114 19.7799   4
  -8  -3  -3 389.321 17.7506   3
   8   3   3 383.680 16.2814   1
   8   3   3 375.967 26.6557   2
  -9  -3  -3 352.919 17.0026   3
  -9  -3  -3 344.797 19.2096   4
   9   3   3 380.329 16.7370   1
 -10  -3  -3 426.763 19.2856   3
 -10  -3  -3 449.086 23.1219   4
  10   3   3 418.944 19.0655   1
  10   3   3 406.697 31.3390   2
 -11  -3  -3 398.992 22.5703   4
 -11  -3  -3 360.560 19.7708   3
  11   3   3 376.301 31.5629   2
  11   3   3 337.021 17.5789   1
  12  -4  -3 113.971 19.1421   2
  12  -4  -3 132.804 7.89229   1
 -12   4   3 96.3596 13.1260   4
  11  -4  -3 288.681 11.9752   1
  11  -4  -3 287.478 23.4505   2
 -11   4   3 296.726 18.8386   4
  10  -4  -3 250.879 10.4559   1
  10  -4  -3 241.365 20.2827   2
 -10   4   3 241.418 15.9123   4
   9  -4  -3 474.863 32.9817   2
   9  -4  -3 419.858 14.1573   1
  -9   4   3 438.092 20.9456   4
   8  -4  -3 1345.09 33.5047   1
   8  -4  -3 1399.35 49.8261   2
  -8   4   3 1387.69 41.9278   4
   7  -4  -3 1157.69 36.1495   4
   7  -4  -3 1253.67 43.9000   2
  -7   4   3 1257.49 37.0548   4
   6  -4  -3 167.889 6.25048   3
   6  -4  -3 165.874 6.47531   1
   6  -4  -3 144.953 12.0712   2
   6  -4  -3 164.398 9.68846   4
  -6   4   3 178.939 10.0749   4
  -6   4   3 158.027 6.21138   3
  -6   4   3 188.664 14.1947   2
   5  -4  -3 473.216 13.9313   3
   5  -4  -3 459.508 12.8728   1
   5  -4  -3 476.448 16.9276   4
  -5   4   3 488.831 14.1183   3
  -5   4   3 478.813 16.9359   4
  -5   4   3 469.556 22.6239   2
  -5   4   3 481.443 21.8802   2
  -4   4   3 2233.35 61.6938   2
   3  -4  -3 3670.71 84.3246   6
  -3   4   3 3691.50 93.0452   5
  -3   4   3 3686.00 84.6973   6
  -3   4   3 3727.94 94.6626   5
   2  -4  -3 3916.17 89.7108   6
   2  -4  -3 3895.62 96.9943   5
  -2   4   3 3898.75 89.8874   6
  -2   4   3 3896.28 96.1582   5
   1  -4  -3 4006.13 91.8313   6
   1  -4  -3 3898.80 96.8458   5
  -1   4   3 4015.58 96.9217   5
  -1   4   3 3884.73 91.7999   6
   0  -4  -3 5054.83 113.571   6
   0  -4  -3 4856.11 117.452   5
   0   4   3 4938.65 113.673   6
  -1  -4  -3 2477.15 66.8653   5
  -1  -4  -3 2401.27 62.4011   6
   1   4   3 2485.95 63.0557   6
   1   4   3 2470.22 67.3064   5
  -2  -4  -3 1395.43 41.0973   2
   2   4   3 1356.58 37.5023   3
  -3  -4  -3 562.741 16.0454   1
  -3  -4  -3 569.240 17.3934   4
  -3  -4  -3 579.498 16.8336   4
  -3  -4  -3 543.323 23.0349   2
  -3  -4  -3 609.138 20.7635   3
   3   4   3 556.026 24.4968   2
   3   4   3 572.705 20.5509   3
   3   4   3 579.072 17.0585   1
  -4  -4  -3 369.154 12.3841   1
  -4  -4  -3 357.536 18.7014   2
  -4  -4  -3 391.154 13.8964   4
  -4  -4  -3 392.580 14.5417   4
  -4  -4  -3 386.573 16.3413   3
   4   4   3 405.812 13.7274   1
   4   4   3 377.892 20.7463   2
  -5  -4  -3 345.943 13.8936   4
  -5  -4  -3 309.810 11.6592   1
  -5  -4  -3 352.545 14.7143   4
  -5  -4  -3 338.879 15.3688   3
   5   4   3 329.087 15.4759   3
   5   4   3 330.275 13.0274   1
   5   4   3 330.281 20.5848   2
  -6  -4  -3 649.058 22.6968   4
  -6  -4  -3 677.744 23.9818   4
  -6  -4  -3 669.719 24.3896   3
   6   4   3 681.126 30.1825   3
   6   4   3 617.579 31.9288   2
   6   4   3 646.827 21.4095   1
  -7  -4  -3 314.349 15.9830   4
  -7  -4  -3 304.941 15.5602   3
   7   4   3 322.129 14.2774   1
  -8  -4  -3 111.867 9.26566   3
  -8  -4  -3 95.3832 9.16648   4
   8   4   3 126.668 8.93421   1
   8   4   3 136.877 19.1613   2
  -9  -4  -3 26.5513 6.41892   4
  -9  -4  -3 25.0622 5.78221   3
   9   4   3 12.1416 6.05630   2
   9   4   3 15.2123 4.30071   1
 -10  -4  -3 -1.5967 1.31525   4
 -10  -4  -3 5.25041 2.40680   3
  10   4   3 1.67473 2.10865   1
  12  -5  -3 119.633 6.97637   1
 -12   5   3 115.342 14.1303   4
  11  -5  -3 356.174 12.8716   1
  11  -5  -3 365.261 26.3108   2
 -11   5   3 360.221 21.0018   4
  10  -5  -3 110.107 6.06560   1
  10  -5  -3 116.975 16.2240   2
 -10   5   3 120.207 10.9423   4
   9  -5  -3 347.174 23.3168   2
   9  -5  -3 359.275 11.7987   1
  -9   5   3 341.099 18.2078   4
   8  -5  -3 95.6214 12.5100   2
   8  -5  -3 131.498 5.93657   1
  -8   5   3 131.297 10.0409   4
   7  -5  -3 2.89074 1.99397   4
   7  -5  -3 0.65466 0.88101   1
  -7   5   3 0.77924 1.53646   4
  -7   5   3 3.66717 1.33473   3
  -7   5   3 2.58226 1.25144   3
  -7   5   3 0.83294 2.19983   2
   6  -5  -3 88.7193 5.16475   3
   6  -5  -3 87.5998 4.25845   1
   6  -5  -3 90.5090 6.88159   4
  -6   5   3 90.5211 7.02222   4
  -6   5   3 68.1630 9.30917   2
  -6   5   3 113.740 15.0415   2
   5  -5  -3 53.4065 4.80797   4
   5  -5  -3 49.3866 4.04338   3
   5  -5  -3 44.7097 2.81443   1
  -5   5   3 45.8227 3.91665   3
  -5   5   3 40.5204 8.23308   2
  -5   5   3 51.1421 4.67424   4
  -5   5   3 50.1370 9.11297   2
   4  -5  -3 78.9534 5.37058   3
   4  -5  -3 89.7576 5.48558   4
  -4   5   3 79.5167 8.05866   2
  -4   5   3 77.1123 5.14292   4
  -4   5   3 79.3393 5.41184   3
   3  -5  -3 21.6060 5.50271   2
   3  -5  -3 17.5035 2.58021   4
   3  -5  -3 17.3362 3.23238   3
  -3   5   3 14.5490 2.22933   4
  -3   5   3 16.5962 2.12195   1
  -3   5   3 15.9991 3.05193   3
  -3   5   3 18.9058 4.87238   2
   2  -5  -3 671.497 25.7864   2
   2  -5  -3 699.977 21.4067   3
  -2   5   3 717.340 25.7630   2
  -2   5   3 673.986 17.4396   1
  -2   5   3 689.731 21.3640   3
   1  -5  -3 274.532 11.9366   3
  -1   5   3 286.090 12.3103   3
  -1   5   3 279.223 14.6683   2
  -1   5   3 270.759 8.57168   1
   0  -5  -3 2483.23 64.8338   2
  -1  -5  -3 1159.84 36.8146   2
   1   5   3 1111.43 36.7351   2
   1   5   3 1152.06 33.2488   3
  -2  -5  -3 829.416 20.2868   4
  -2  -5  -3 857.870 30.4266   2
  -2  -5  -3 822.866 20.8667   4
  -2  -5  -3 800.640 21.2840   1
  -2  -5  -3 839.733 26.5987   3
   2   5   3 786.434 26.3524   3
   2   5   3 808.266 30.7105   2
  -3  -5  -3 1538.61 47.4421   2
   3   5   3 1565.57 43.2950   3
  -4  -5  -3 1206.05 32.0876   4
  -4  -5  -3 1214.26 36.6417   3
  -4  -5  -3 1231.90 31.1509   1
  -4  -5  -3 1262.91 33.1626   4
   4   5   3 1216.66 44.1724   2
   4   5   3 1233.53 37.1936   3
  -5  -5  -3 369.552 14.4323   4
  -5  -5  -3 344.981 14.5917   4
  -5  -5  -3 348.800 16.5635   3
  -5  -5  -3 342.480 12.6041   1
   5   5   3 351.040 14.0440   1
   5   5   3 364.003 22.7059   2
  -6  -5  -3 1369.83 41.0322   3
  -6  -5  -3 1330.76 38.0204   4
  -6  -5  -3 1326.95 38.8711   4
   6   5   3 1397.76 53.1007   2
   6   5   3 1357.61 37.6974   1
  -7  -5  -3 412.487 19.2830   3
  -7  -5  -3 433.355 18.9880   4
   7   5   3 426.223 17.5317   1
   7   5   3 406.995 27.6916   2
  -8  -5  -3 731.598 27.7401   4
  -8  -5  -3 701.936 27.2342   3
   8   5   3 695.359 39.4281   2
   8   5   3 691.723 25.2252   1
  -9  -5  -3 544.045 23.5199   3
  -9  -5  -3 532.063 24.2716   4
   9   5   3 541.743 36.1434   2
   9   5   3 543.780 22.4205   1
 -10  -5  -3 515.149 24.7848   4
 -10  -5  -3 494.978 22.4428   3
  10   5   3 427.084 34.1019   2
  10   5   3 489.754 21.9570   1
  12  -6  -3 540.774 16.2767   1
  12  -6  -3 557.103 34.5781   2
 -12   6   3 538.688 27.3542   4
 -12   6   3 485.254 33.0762   2
  11  -6  -3 343.067 11.7941   1
  11  -6  -3 370.513 26.4979   2
 -11   6   3 375.348 27.1054   2
 -11   6   3 357.438 20.7951   4
  10  -6  -3 673.234 18.3672   1
 -10   6   3 646.677 35.1905   2
 -10   6   3 679.279 28.4249   4
   9  -6  -3 887.621 22.7305   1
  -9   6   3 891.024 32.4874   4
  -9   6   3 934.453 40.8463   2
   8  -6  -3 1241.94 29.3360   1
  -8   6   3 1174.55 46.3106   2
  -8   6   3 1267.06 31.3175   3
  -8   6   3 1232.85 38.5192   4
   7  -6  -3 1350.31 39.2074   4
   7  -6  -3 1427.80 35.0380   3
  -7   6   3 1406.78 40.2000   4
  -7   6   3 1334.64 34.6619   3
  -7   6   3 1404.62 48.9385   2
   6  -6  -3 1163.50 33.4137   4
   6  -6  -3 1209.55 31.4385   3
  -6   6   3 1198.28 33.9570   4
  -6   6   3 1142.69 31.2166   3
  -6   6   3 1198.55 42.4856   2
   5  -6  -3 585.228 18.9362   3
   5  -6  -3 584.225 18.9348   4
  -5   6   3 579.192 18.9878   3
  -5   6   3 591.926 27.6805   2
  -5   6   3 613.954 19.3995   4
  -5   6   3 600.831 26.3295   2
   4  -6  -3 533.445 17.8788   3
  -4   6   3 473.166 23.7321   2
  -4   6   3 515.864 23.1765   2
  -4   6   3 516.746 15.8305   4
  -4   6   3 510.636 17.6782   3
   3  -6  -3 593.719 20.2157   3
   3  -6  -3 588.338 25.6317   2
  -3   6   3 652.759 25.8574   2
  -3   6   3 638.852 16.4184   4
  -3   6   3 610.748 15.5999   1
  -3   6   3 603.526 20.4223   3
  -3   6   3 624.695 16.3018   4
   2  -6  -3 1331.01 42.9986   2
  -2   6   3 1386.13 37.9007   3
  -2   6   3 1407.09 42.8703   2
   1  -6  -3 1456.88 45.2175   2
  -1   6   3 1501.32 45.0606   2
  -1   6   3 1488.57 40.4575   3
   0  -6  -3 1536.47 46.9866   2
   0   6   3 1592.54 47.5620   2
   0   6   3 1565.81 43.0398   3
  -1  -6  -3 648.569 26.2800   2
  -1  -6  -3 626.812 22.5525   3
   1   6   3 641.628 26.5722   2
   1   6   3 653.897 18.4663   1
  -2  -6  -3 157.218 5.93163   4
  -2  -6  -3 157.674 5.72524   4
  -2  -6  -3 175.961 10.6937   3
  -2  -6  -3 137.937 11.4564   2
   2   6   3 161.794 12.7855   2
   2   6   3 166.479 7.80915   1
  -3  -6  -3 134.764 9.77426   3
  -3  -6  -3 146.122 6.55139   4
  -3  -6  -3 150.718 7.10740   1
  -3  -6  -3 152.805 7.00728   4
   3   6   3 135.410 7.50357   1
   3   6   3 123.944 11.8841   2
  -4  -6  -3 57.2961 4.59881   4
  -4  -6  -3 61.0439 8.68446   3
  -4  -6  -3 58.7014 4.83459   4
  -4  -6  -3 55.0756 4.35064   1
   4   6   3 47.3976 8.24591   2
   4   6   3 40.7424 4.62963   1
  -5  -6  -3 177.462 11.7753   3
  -5  -6  -3 170.539 9.12735   4
  -5  -6  -3 160.321 8.25840   1
  -5  -6  -3 165.652 9.38027   4
   5   6   3 168.287 15.6719   2
   5   6   3 178.195 9.83625   1
  -6  -6  -3 29.7871 6.06533   3
  -6  -6  -3 34.1180 5.48662   4
  -6  -6  -3 34.6443 5.29828   4
   6   6   3 16.7045 6.58480   2
  -7  -6  -3 3.38416 2.19761   4
   7   6   3 3.22497 2.01119   1
   7   6   3 3.15127 3.71621   2
  -8  -6  -3 123.183 10.6703   3
  -8  -6  -3 120.560 10.0573   4
   8   6   3 118.099 9.44297   1
   8   6   3 108.239 19.3822   2
  -9  -6  -3 37.9566 7.60591   3
  -9  -6  -3 29.0314 6.30923   4
   9   6   3 18.6425 8.03898   2
  12  -7  -3 1.29236 1.16039   1
 -12   7   3 1.31745 2.12548   4
 -12   7   3 2.87298 3.19630   2
  11  -7  -3 107.016 5.05065   1
 -11   7   3 146.393 21.8131   2
 -11   7   3 81.2374 11.6676   4
  10  -7  -3 18.8529 2.72921   1
 -10   7   3 17.6302 5.16094   4
 -10   7   3 8.90485 5.41120   2
   9  -7  -3 167.277 6.16138   1
  -9   7   3 157.888 11.8168   4
  -9   7   3 158.822 7.68722   3
  -9   7   3 151.840 15.5990   2
  -9   7   3 156.821 7.33391   3
  -8   7   3 444.763 15.7542   3
  -8   7   3 493.011 16.8274   3
  -8   7   3 516.928 21.1819   4
   7  -7  -3 83.7250 6.08250   3
  -7   7   3 84.0187 7.26172   4
  -7   7   3 75.2552 5.83203   3
  -7   7   3 81.2344 6.91811   4
  -7   7   3 80.9603 12.9297   2
   6  -7  -3 314.881 12.9769   3
  -6   7   3 298.664 13.3980   4
  -6   7   3 273.316 18.2663   2
  -6   7   3 294.586 12.7937   3
  -6   7   3 314.609 13.2243   4
   5  -7  -3 267.978 14.0104   3
  -5   7   3 256.135 16.8419   2
  -5   7   3 300.160 11.5690   4
  -5   7   3 277.997 11.5151   4
  -5   7   3 270.861 12.5580   3
   4  -7  -3 24.3435 4.29142   3
  -4   7   3 24.3141 2.00519   1
  -4   7   3 20.9293 3.51212   4
  -4   7   3 23.8331 4.34333   3
  -4   7   3 22.5119 6.31751   2
  -4   7   3 20.9091 6.35123   2
  -4   7   3 26.2319 3.35956   4
   3  -7  -3 94.2138 7.16224   3
   3  -7  -3 74.4636 10.2636   2
  -3   7   3 98.3606 3.95494   4
  -3   7   3 93.2933 4.40014   1
  -3   7   3 98.7747 9.50983   2
  -3   7   3 87.9189 7.04509   3
  -3   7   3 94.8089 4.03100   4
   2  -7  -3 1394.25 38.9216   3
   2  -7  -3 1343.04 44.5843   2
  -2   7   3 1414.04 42.9487   3
  -2   7   3 1353.89 44.0661   2
   1  -7  -3 966.185 29.9168   3
   1  -7  -3 866.771 33.5708   2
  -1   7   3 907.659 29.5508   3
  -1   7   3 936.591 34.2041   2
  -1   7   3 989.140 24.1894   1
   0  -7  -3 615.353 26.8505   2
   0  -7  -3 694.820 24.3344   3
   0   7   3 668.940 18.9510   1
   0   7   3 686.257 24.6016   3
  -1  -7  -3 1054.38 33.3445   3
   1   7   3 1026.33 37.8319   2
   1   7   3 1068.56 27.8078   1
  -2  -7  -3 1738.51 49.1687   3
   2   7   3 1723.31 55.3012   2
   2   7   3 1770.64 43.4193   1
  -3  -7  -3 852.640 22.1277   4
  -3  -7  -3 842.227 29.7754   3
  -3  -7  -3 838.124 22.9439   4
  -3  -7  -3 816.654 23.3903   1
   3   7   3 865.098 36.0431   2
   3   7   3 889.202 25.4898   1
  -4  -7  -3 864.098 25.8234   1
  -4  -7  -3 952.463 25.5522   4
  -4  -7  -3 903.509 31.8806   3
  -4  -7  -3 916.099 24.9683   4
   4   7   3 930.590 27.6413   1
  -5  -7  -3 1090.06 30.7943   4
  -5  -7  -3 1096.76 31.4077   4
  -5  -7  -3 1146.65 37.5741   3
   5   7   3 1112.21 32.9055   1
   5   7   3 1122.85 46.9893   2
  -6  -7  -3 625.157 26.0501   3
  -6  -7  -3 601.598 21.8205   4
  -6  -7  -3 629.084 21.8208   4
   6   7   3 614.523 34.7978   2
   6   7   3 662.729 24.0581   1
  -7  -7  -3 548.029 21.6060   4
  -7  -7  -3 549.362 24.5239   3
   7   7   3 552.513 22.0380   1
   7   7   3 547.052 34.4092   2
  -8  -7  -3 321.615 16.8978   4
  -8  -7  -3 265.709 16.6749   3
   8   7   3 297.773 26.2407   2
   8   7   3 292.429 15.8400   1
  -9  -7  -3 369.693 18.8394   4
  -9  -7  -3 344.347 19.2884   3
   9   7   3 339.244 29.6221   2
 -12   8   3 617.186 37.6451   2
 -12   8   3 610.948 30.0177   4
 -11   8   3 561.501 34.8870   2
 -11   8   3 564.628 26.8015   4
 -10   8   3 657.973 19.3719   3
 -10   8   3 686.108 36.6588   2
 -10   8   3 669.270 28.0599   4
 -10   8   3 626.000 18.7830   3
  -9   8   3 946.223 27.6734   3
  -9   8   3 902.348 41.8859   2
  -9   8   3 968.586 33.4647   4
  -9   8   3 922.151 26.8588   3
  -8   8   3 459.118 26.5116   2
  -8   8   3 431.199 19.0402   4
  -8   8   3 405.916 15.9753   3
   7  -8  -3 333.380 14.4072   3
  -7   8   3 322.704 14.2697   3
  -7   8   3 323.538 14.5260   4
  -7   8   3 346.507 21.8268   2
  -7   8   3 348.720 15.4716   4
   6  -8  -3 410.220 16.4870   3
  -6   8   3 403.374 10.9679   1
  -6   8   3 407.498 15.2487   4
  -6   8   3 397.682 22.8803   2
   5  -8  -3 817.631 26.2290   3
  -5   8   3 804.007 22.2587   4
  -5   8   3 757.835 25.9432   3
  -5   8   3 775.721 32.7285   2
  -5   8   3 793.982 22.7228   4
  -5   8   3 752.844 19.1300   1
   4  -8  -3 214.866 11.7747   3
  -4   8   3 207.270 7.50628   4
  -4   8   3 215.762 8.02302   4
  -4   8   3 200.967 11.5804   3
  -4   8   3 207.202 7.31023   1
  -4   8   3 201.411 14.7392   2
   3  -8  -3 926.849 29.9190   3
  -3   8   3 936.304 35.4713   2
  -3   8   3 874.356 29.6539   3
  -3   8   3 952.648 23.1991   1
   2  -8  -3 940.230 30.3965   3
  -2   8   3 934.806 35.1074   2
  -2   8   3 878.465 30.3173   3
   1  -8  -3 128.936 9.54609   3
  -1   8   3 127.205 11.6062   2
  -1   8   3 128.359 6.36851   1
   0  -8  -3 379.166 17.5092   3
   0   8   3 363.156 12.6345   1
   0   8   3 323.270 19.4657   2
  -1  -8  -3 79.0480 7.83028   3
   1   8   3 74.5460 5.40820   1
   1   8   3 70.4048 9.63496   2
  -2  -8  -3 111.494 9.58871   3
   2   8   3 123.707 12.4918   2
  -3  -8  -3 1.53660 2.00480   3
  -3  -8  -3 5.37758 1.34973   4
  -3  -8  -3 3.94698 1.19106   4
   3   8   3 1.81929 2.57230   2
   3   8   3 1.70040 1.33184   1
  -4  -8  -3 117.983 6.32709   4
  -4  -8  -3 114.443 8.64815   1
  -4  -8  -3 116.073 6.08273   4
   4   8   3 111.272 15.4288   2
   4   8   3 109.841 7.97968   1
  -5  -8  -3 83.1614 11.2908   3
  -5  -8  -3 63.5394 5.13324   4
   5   8   3 73.1433 8.39308   1
   5   8   3 65.7072 11.7861   2
  -6  -8  -3 119.515 8.11969   4
  -6  -8  -3 114.288 10.6265   3
  -6  -8  -3 119.607 7.84206   4
   6   8   3 110.109 17.5575   2
   6   8   3 101.109 8.53482   1
  -7  -8  -3 126.030 9.07234   4
  -7  -8  -3 114.338 11.0167   3
   7   8   3 118.219 19.8931   2
   7   8   3 120.581 9.75180   1
  -8  -8  -3 55.7808 9.19059   3
   8   8   3 58.1858 7.89384   1
   8   8   3 70.3366 16.2177   2
 -11   9   3 119.630 19.8944   2
 -11   9   3 102.206 12.6243   4
 -10   9   3 247.880 21.4122   2
 -10   9   3 282.165 16.8366   4
 -10   9   3 245.562 14.2670   3
  -9   9   3 357.810 24.9606   2
  -9   9   3 345.380 15.5126   3
  -9   9   3 351.151 18.0784   4
   8  -9  -3 436.332 17.5765   3
  -8   9   3 441.369 26.6710   2
  -8   9   3 399.118 17.2062   3
  -8   9   3 442.045 19.1753   4
   7  -9  -3 891.493 28.9709   3
  -7   9   3 909.399 28.5932   4
  -7   9   3 902.073 38.9675   2
  -7   9   3 859.268 28.8976   3
  -7   9   3 919.465 28.1870   4
   6  -9  -3 507.565 20.0555   3
  -6   9   3 523.391 27.5721   2
  -6   9   3 517.720 17.1733   4
  -6   9   3 506.194 20.5417   3
  -6   9   3 511.664 17.8659   4
   5  -9  -3 1106.84 34.6422   3
  -5   9   3 1121.62 26.6639   1
  -5   9   3 1113.56 42.1116   2
  -5   9   3 1126.53 28.2917   4
  -5   9   3 1109.19 28.9666   4
   4  -9  -3 1152.69 35.5995   3
  -4   9   3 1146.43 42.2199   2
  -4   9   3 1129.00 26.5212   4
  -4   9   3 1125.80 27.5441   1
  -4   9   3 1144.01 26.1530   4
   3  -9  -3 1199.42 37.3436   3
  -3   9   3 1191.28 29.6261   1
  -3   9   3 1236.81 44.0256   2
   2  -9  -3 756.004 27.5964   3
  -2   9   3 733.225 20.6850   1
  -2   9   3 799.130 32.7598   2
   1  -9  -3 1184.64 38.0958   3
  -1   9   3 1184.70 30.7810   1
  -1   9   3 1209.94 43.4197   2
   0  -9  -3 1628.30 46.8592   3
   0   9   3 1496.72 51.5292   2
   0   9   3 1465.00 38.3451   1
  -1  -9  -3 1754.63 51.2503   3
   1   9   3 1745.69 44.2147   1
   2   9   3 627.812 31.4938   2
  -3  -9  -3 607.792 26.1329   3
   3   9   3 631.004 32.5181   2
   3   9   3 619.770 21.7057   1
  -4  -9  -3 908.767 23.2544   4
  -4  -9  -3 902.428 23.3606   4
  -4  -9  -3 913.331 34.1630   3
   4   9   3 927.971 42.4151   2
   4   9   3 897.836 29.0805   1
  -5  -9  -3 557.672 17.6287   4
  -5  -9  -3 557.403 17.7456   4
  -5  -9  -3 612.749 26.5781   3
   5   9   3 539.019 21.7017   1
   5   9   3 561.206 33.6105   2
  -6  -9  -3 289.850 18.0058   3
  -6  -9  -3 282.632 12.3789   4
   6   9   3 254.010 23.2228   2
   6   9   3 271.443 14.9362   1
  -7  -9  -3 116.455 11.5442   3
   7   9   3 111.707 20.3774   2
   7   9   3 113.701 9.91329   1
 -11  10   3 471.873 23.7773   4
 -11  10   3 500.636 32.6739   2
 -10  10   3 349.833 31.7052   2
 -10  10   3 304.922 17.6629   4
 -10  10   3 338.110 15.5236   3
  -9  10   3 440.278 20.1634   4
  -9  10   3 443.341 28.3624   2
  -9  10   3 424.263 18.9356   3
   8 -10  -3 253.309 13.7270   3
  -8  10   3 242.521 19.9531   2
  -8  10   3 296.935 14.6572   4
   7 -10  -3 37.1873 6.60971   3
  -7  10   3 38.0756 5.41874   4
  -7  10   3 47.2199 11.2410   2
  -7  10   3 50.7161 6.63353   4
   6 -10  -3 34.8848 6.20579   3
  -6  10   3 42.9956 8.40689   2
  -6  10   3 49.7807 4.53092   4
  -6  10   3 56.8469 4.39405   4
   5 -10  -3 5.21657 2.78734   3
  -5  10   3 4.34273 1.45841   4
  -5  10   3 1.77867 2.26752   2
  -5  10   3 3.71124 1.16673   1
  -5  10   3 3.70970 1.22783   4
   4 -10  -3 116.233 9.61232   3
  -4  10   3 91.7840 12.5207   2
  -4  10   3 101.720 5.34275   1
   3 -10  -3 10.4604 3.73802   3
  -3  10   3 11.0365 4.77933   2
  -3  10   3 11.5234 2.33867   1
   2 -10  -3 126.850 10.6689   3
  -2  10   3 155.893 13.8798   2
  -2  10   3 153.901 7.48274   1
   1 -10  -3 384.768 19.8757   3
  -1  10   3 399.177 23.5252   2
  -1  10   3 408.330 14.3494   1
   0 -10  -3 35.1752 7.17624   3
   0  10   3 42.6918 13.4970   2
   0  10   3 38.5530 4.92916   1
  -1 -10  -3 45.9862 8.60256   3
   1  10   3 31.9772 4.36306   1
   1  10   3 37.8563 9.48097   2
  -2 -10  -3 11.6791 4.14381   3
   2  10   3 8.64268 5.22454   2
   2  10   3 11.0042 3.21456   1
  -3 -10  -3 186.665 14.0755   3
   3  10   3 172.056 10.5505   1
   3  10   3 180.522 17.3767   2
  -4 -10  -3 171.828 13.7959   3
   4  10   3 165.613 10.8862   1
   4  10   3 174.719 17.9862   2
  -5 -10  -3 379.154 21.3744   3
   5  10   3 368.394 27.7043   2
   5  10   3 339.783 17.1537   1
  -6 -10  -3 338.250 21.5552   3
   6  10   3 368.934 18.5024   1
   6  10   3 396.103 29.9844   2
 -10  11   3 550.292 33.9604   2
 -10  11   3 555.994 22.7598   3
 -10  11   3 576.724 24.5967   4
  -9  11   3 480.745 29.9802   2
  -9  11   3 497.123 20.9449   4
  -9  11   3 428.524 20.4579   3
   8 -11  -3 698.420 26.6316   3
  -8  11   3 765.420 37.5658   2
  -8  11   3 698.551 24.7384   4
   7 -11  -3 710.464 26.8611   3
  -7  11   3 658.604 20.7308   4
  -7  11   3 660.591 34.0913   2
  -7  11   3 685.925 22.1724   4
   6 -11  -3 753.687 28.7191   3
  -6  11   3 765.126 20.8459   4
  -6  11   3 783.414 21.8974   4
  -6  11   3 797.986 36.7323   2
   5 -11  -3 988.214 38.4546   3
  -5  11   3 996.211 41.6246   2
   4 -11  -3 348.506 20.3366   3
  -4  11   3 338.504 22.0911   2
  -4  11   3 302.616 11.0594   1
   3 -11  -3 539.130 23.9102   3
  -3  11   3 537.336 28.4264   2
  -3  11   3 527.101 16.6714   1
   2 -11  -3 342.224 18.6594   3
  -2  11   3 324.925 21.5954   2
  -2  11   3 305.688 12.2028   1
   1 -11  -3 539.482 24.5321   3
  -1  11   3 512.192 28.1501   2
   0 -11  -3 609.362 26.9546   3
   0  11   3 622.498 20.6617   1
   0  11   3 582.627 30.8372   2
  -1 -11  -3 291.365 18.0526   3
   1  11   3 292.191 21.5544   2
   1  11   3 277.552 13.1179   1
  -2 -11  -3 303.725 18.5434   3
   2  11   3 281.563 13.8842   1
   2  11   3 314.257 23.1184   2
  -3 -11  -3 228.715 16.1924   3
   3  11   3 216.543 19.9321   2
   3  11   3 236.753 13.0466   1
  -4 -11  -3 197.503 15.3240   3
   4  11   3 197.993 12.5345   1
   4  11   3 183.392 19.1554   2
  -5 -11  -3 249.152 17.8160   3
   5  11   3 213.548 21.6196   2
   5  11   3 246.944 14.6155   1
  -9  12   3 5.50190 2.38243   4
  -9  12   3 6.44824 5.35354   2
   8 -12  -3 30.1480 6.45381   3
  -8  12   3 31.1088 4.85110   4
  -8  12   3 33.7502 9.67299   2
   7 -12  -3 7.05775 3.60602   3
  -7  12   3 6.87612 2.14596   4
  -7  12   3 6.21155 5.06850   2
   6 -12  -3 54.4676 9.04780   3
  -6  12   3 55.8897 11.7992   2
   5 -12  -3 21.1540 5.13903   3
  -5  12   3 21.4396 6.37309   2
   4 -12  -3 15.7175 4.60603   3
  -4  12   3 17.6673 5.92294   2
   3 -12  -3 107.015 10.4236   3
  -3  12   3 94.9161 14.4562   2
   2 -12  -3 38.5506 7.45394   3
  -2  12   3 32.1835 7.87792   2
  -2  12   3 45.8969 5.95829   1
   1 -12  -3 161.827 13.3975   3
  -1  12   3 143.948 8.89422   1
  -1  12   3 156.995 15.6570   2
   0 -12  -3 218.579 16.0283   3
   0  12   3 198.552 11.4694   1
   0  12   3 236.818 19.5929   2
  -1 -12  -3 452.606 23.7360   3
   1  12   3 408.051 27.1147   2
  -2 -12  -3 567.510 27.6665   3
   2  12   3 532.985 32.0683   2
  -3 -12  -3 541.476 27.6589   3
   3  12   3 635.826 54.7171   2
  -4 -12  -3 243.269 17.9590   3
   4  12   3 228.281 22.1768   2
   8 -13  -3 334.956 18.7298   3
  -8  13   3 338.142 25.4277   2
   7 -13  -3 492.159 23.4526   3
  -7  13   3 403.080 33.9981   2
   6 -13  -3 439.095 22.3277   3
  -6  13   3 416.423 27.6342   2
   5 -13  -3 666.683 29.2128   3
  -5  13   3 724.780 36.4451   2
   4 -13  -3 419.301 22.5520   3
  -4  13   3 440.816 27.9824   2
   3 -13  -3 400.331 22.0841   3
  -3  13   3 368.797 25.0738   2
   2 -13  -3 136.353 12.6127   3
  -2  13   3 148.813 15.6895   2
   1 -13  -3 201.037 15.6701   3
  -1  13   3 199.759 18.5156   2
   0  13   3 114.076 17.9887   2
  -1 -13  -3 7.15293 4.68024   3
   1  13   3 21.7590 10.2461   2
  -2 -13  -3 50.1283 10.7747   3
   2  13   3 35.2153 10.7248   2
   5 -14  -3 219.342 19.0388   3
  -5  14   3 223.872 20.3115   2
  -4  14   3 362.103 26.1013   2
   3 -14  -3 360.020 21.8097   3
  -3  14   3 342.271 31.0913   2
   2 -14  -3 236.620 17.6289   3
  -2  14   3 209.061 20.5383   2
   1 -14  -3 157.739 14.2634   3
  -1  14   3 98.8896 14.9724   2
  -1  15  -4 92.7805 12.9652   2
   1 -15   4 80.4756 12.6267   3
  -2  15  -4 229.293 16.4818   2
   2 -15   4 203.538 16.5572   3
  -3  15  -4 193.103 12.0454   4
  -3  15  -4 232.138 16.3879   2
   3 -15   4 227.437 17.4096   3
  -4  15  -4 215.679 16.0394   2
  -4  15  -4 217.041 12.3570   4
   4 -15   4 203.835 16.6194   3
  -5  15  -4 380.061 22.1120   2
  -5  15  -4 418.187 25.4972   3
  -5  15  -4 371.712 17.8423   4
   2  14  -4 287.367 20.1713   2
  -2 -14   4 291.980 19.5609   3
   1  14  -4 279.712 18.9938   2
  -1 -14   4 277.746 18.8234   3
  -1  14  -4 238.141 16.4630   2
   1 -14   4 265.605 18.4136   3
  -2  14  -4 220.459 15.3904   2
   2 -14   4 209.951 11.0083   4
   2 -14   4 234.555 16.9401   3
  -3  14  -4 172.476 13.5379   2
   3 -14   4 182.598 10.4904   4
   3 -14   4 153.517 13.8632   3
  -4  14  -4 77.8424 9.31231   4
  -4  14  -4 97.4752 10.1629   2
   4 -14   4 81.4868 12.2146   3
  -5  14  -4 5.22963 2.74028   4
  -5  14  -4 3.17445 3.01845   3
  -6  14  -4 3.27927 2.95092   2
  -6  14  -4 16.5183 6.84858   3
  -6  14  -4 10.3814 3.94084   4
  -7  14  -4 4.14576 2.87165   4
  -7  14  -4 4.51677 3.31285   2
   4  13  -4 121.252 17.7562   2
  -4 -13   4 97.7389 12.8541   3
   3  13  -4 263.034 19.2861   2
  -3 -13   4 262.306 12.2719   4
  -3 -13   4 236.217 17.1198   3
   2  13  -4 182.155 15.0301   2
  -2 -13   4 184.177 14.8215   3
  -2 -13   4 179.121 9.71639   4
   1  13  -4 309.117 19.1800   2
  -1 -13   4 312.983 19.5299   3
  -1 -13   4 329.070 13.5673   4
   0  13  -4 190.890 14.1303   2
   0  13  -4 157.924 9.88823   4
   0 -13   4 196.597 14.7563   3
   0 -13   4 180.638 9.61269   4
  -1  13  -4 758.433 26.2617   4
  -1  13  -4 831.100 32.0086   2
   1 -13   4 825.005 33.3061   3
   1 -13   4 838.026 22.5238   1
   1 -13   4 818.769 25.1997   4
  -2  13  -4 486.313 18.5567   4
  -2  13  -4 486.770 23.1182   2
   2 -13   4 543.205 25.7306   3
   2 -13   4 542.479 15.2160   1
   2 -13   4 514.971 19.0407   4
  -3  13  -4 511.596 23.7608   2
  -3  13  -4 455.366 18.1765   4
   3 -13   4 515.155 24.9789   3
   3 -13   4 501.188 19.2526   4
  -4  13  -4 545.373 24.7764   2
   4 -13   4 547.410 26.2557   3
   4 -13   4 570.689 21.7671   4
  -5  13  -4 140.850 12.1643   2
  -5  13  -4 167.839 14.4846   3
  -5  13  -4 134.932 10.4864   4
  -6  13  -4 348.174 18.3987   4
  -6  13  -4 371.956 21.0377   2
  -6  13  -4 384.578 22.5891   3
  -7  13  -4 558.842 25.5051   4
  -7  13  -4 616.466 29.6926   3
  -7  13  -4 619.880 29.0618   2
  -8  13  -4 282.440 19.8637   2
  -8  13  -4 266.118 17.4280   4
  -8  13  -4 282.186 19.4102   3
   5  12  -4 285.948 21.5618   2
  -5 -12   4 291.738 14.3282   4
  -5 -12   4 278.224 17.9634   3
   4  12  -4 308.744 21.4808   2
  -4 -12   4 347.320 19.9686   3
  -4 -12   4 329.476 14.8762   4
   3  12  -4 366.793 17.1660   1
   3  12  -4 433.056 24.0366   2
  -3 -12   4 389.358 15.8578   4
  -3 -12   4 380.453 21.0583   3
   2  12  -4 323.242 19.6097   2
   2  12  -4 319.080 14.8750   1
   2  12  -4 286.705 14.5460   4
  -2 -12   4 353.070 19.7086   3
  -2 -12   4 317.082 13.6114   4
   1  12  -4 121.153 8.94682   1
   1  12  -4 107.995 8.07481   4
   1  12  -4 113.273 10.7144   2
  -1 -12   4 99.6868 6.52977   1
  -1 -12   4 69.1158 9.78441   3
  -1 -12   4 109.914 7.39407   4
   0  12  -4 73.5065 10.5578   2
   0  12  -4 59.4733 5.43527   1
   0 -12   4 50.1836 8.49504   3
   0 -12   4 61.8995 4.77482   1
   0 -12   4 47.1867 9.45943   2
   0 -12   4 63.3027 5.58608   4
  -1  12  -4 33.3785 4.81213   1
  -1  12  -4 28.3707 6.07331   2
   1 -12   4 35.5933 5.16572   4
   1 -12   4 30.3427 6.69954   2
   1 -12   4 21.3986 5.74154   3
   1 -12   4 29.6735 3.66271   1
  -2  12  -4 198.920 13.3101   2
  -2  12  -4 198.924 9.42973   1
  -2  12  -4 203.554 10.9218   4
  -2  12  -4 179.300 13.7340   2
   2 -12   4 222.757 11.2616   4
   2 -12   4 210.174 7.87014   1
   2 -12   4 240.407 15.5728   3
  -3  12  -4 131.648 8.55492   4
  -3  12  -4 124.908 11.6013   2
  -3  12  -4 128.174 10.5996   2
   3 -12   4 129.524 11.4502   3
   3 -12   4 127.629 8.81340   4
  -4  12  -4 1.78174 1.72653   4
  -4  12  -4 3.77052 2.74583   2
   4 -12   4 2.36567 1.97816   4
   4 -12   4 -0.7606 1.84292   3
  -5  12  -4 79.7911 11.2749   2
  -5  12  -4 90.4992 8.54672   4
  -5  12  -4 90.4916 13.3098   3
  -6  12  -4 -0.3883 2.35940   3
  -6  12  -4 0.91774 1.87660   2
  -6  12  -4 1.45422 1.76396   4
  -7  12  -4 23.5712 7.01376   2
  -7  12  -4 27.8447 7.58970   3
  -8  12  -4 134.485 13.1534   2
  -8  12  -4 124.593 12.2875   3
  -8  12  -4 107.344 12.9992   4
  -9  12  -4 114.005 15.1730   3
  -9  12  -4 120.493 14.2362   4
  -9  12  -4 106.627 15.2392   2
   6  11  -4 267.346 15.4572   1
   6  11  -4 224.413 19.7425   2
  -6 -11   4 234.703 13.6450   4
  -6 -11   4 255.456 16.4075   3
   5  11  -4 398.649 24.8182   2
   5  11  -4 398.928 18.5447   1
  -5 -11   4 357.064 16.6779   4
  -5 -11   4 360.441 19.8321   3
   4  11  -4 485.659 26.2609   2
   4  11  -4 472.982 19.8271   1
  -4 -11   4 468.440 22.7393   3
  -4 -11   4 448.962 18.3080   4
   3  11  -4 473.334 24.3494   2
   3  11  -4 454.604 18.5422   1
  -3 -11   4 463.510 16.9245   1
  -3 -11   4 435.309 17.2401   4
  -3 -11   4 412.829 21.2192   3
   2  11  -4 542.751 24.8298   2
   2  11  -4 519.657 19.3191   1
   2  11  -4 467.992 19.4226   4
  -2 -11   4 472.350 22.7662   3
  -2 -11   4 533.994 18.6800   4
   1  11  -4 661.837 26.4801   4
   1  11  -4 692.106 22.5910   1
   1  11  -4 710.773 28.0723   2
  -1 -11   4 638.659 26.1691   2
  -1 -11   4 723.858 21.1578   1
  -1 -11   4 707.515 22.3690   4
  -1 -11   4 684.168 28.0346   3
   0  11  -4 1340.39 36.1637   1
   0  11  -4 1407.28 42.8708   2
   0  11  -4 1336.63 38.0268   4
   0 -11   4 1413.06 37.0380   4
   0 -11   4 1319.76 45.5312   2
   0 -11   4 1371.33 43.9437   3
   0 -11   4 1379.72 34.4856   1
  -1  11  -4 861.372 24.5594   1
  -1  11  -4 891.221 30.6523   2
  -1  11  -4 846.345 26.7083   4
   1 -11   4 876.701 32.5053   3
   1 -11   4 880.173 23.1514   1
   1 -11   4 891.769 31.4239   2
   1 -11   4 883.054 26.5358   4
  -2  11  -4 1005.75 35.3161   2
  -2  11  -4 1036.87 33.8926   2
  -2  11  -4 953.252 31.5625   4
  -2  11  -4 994.941 26.1688   1
   2 -11   4 989.440 29.7802   4
   2 -11   4 1042.49 24.9249   1
   2 -11   4 990.615 42.5683   3
  -3  11  -4 633.481 21.9894   4
  -3  11  -4 699.766 26.1103   2
   3 -11   4 675.222 16.4736   1
   3 -11   4 639.248 22.7259   4
  -4  11  -4 1025.27 38.3488   3
  -4  11  -4 987.464 33.7317   2
  -4  11  -4 929.928 29.4294   4
  -4  11  -4 970.453 36.4525   2
   4 -11   4 987.018 41.7964   3
   4 -11   4 987.532 31.1706   4
  -5  11  -4 619.926 26.9108   3
  -5  11  -4 552.472 24.2938   2
  -5  11  -4 546.209 26.8312   2
   5 -11   4 616.712 23.5645   4
  -6  11  -4 499.644 22.4096   4
  -6  11  -4 534.854 25.1159   3
  -6  11  -4 506.879 24.0227   2
  -7  11  -4 226.319 15.8838   3
  -7  11  -4 247.891 15.5750   4
  -7  11  -4 220.146 15.9993   2
  -8  11  -4 287.946 18.1699   3
  -8  11  -4 316.791 18.7494   4
  -9  11  -4 101.651 13.6335   3
  -9  11  -4 134.980 12.7063   4
  -9  11  -4 117.258 16.7388   2
 -10  11  -4 171.782 16.6466   2
 -10  11  -4 159.287 13.3698   3
 -10  11  -4 176.304 15.2237   4
   7  10  -4 209.935 19.6553   2
   7  10  -4 227.276 14.3638   1
  -7 -10   4 196.829 13.8351   3
  -7 -10   4 220.342 13.6819   4
   6  10  -4 116.878 17.0972   2
   6  10  -4 113.577 9.66928   1
  -6 -10   4 126.419 10.9350   3
   5  10  -4 203.342 17.0322   2
   5  10  -4 229.179 13.1946   1
  -5 -10   4 252.658 12.3073   1
  -5 -10   4 236.403 15.0146   3
  -5 -10   4 257.559 13.4054   4
   4  10  -4 58.3473 10.5660   2
   4  10  -4 64.9674 8.21407   1
  -4 -10   4 56.9161 7.19340   4
  -4 -10   4 78.1927 11.3872   3
  -4 -10   4 54.1498 6.30233   1
   3  10  -4 118.554 11.1663   2
   3  10  -4 114.414 8.18645   1
   3  10  -4 111.722 8.65011   4
  -3 -10   4 101.886 13.8018   3
  -3 -10   4 96.7318 9.31628   2
  -3 -10   4 113.739 7.91587   4
  -3 -10   4 118.914 7.46480   1
   2  10  -4 26.0977 4.49173   1
   2  10  -4 26.7288 6.49877   2
   2  10  -4 22.2246 4.65512   4
  -2 -10   4 19.0502 4.68597   3
  -2 -10   4 22.6361 4.12681   4
  -2 -10   4 21.9542 4.98810   2
   1  10  -4 34.0666 5.11007   1
   1  10  -4 32.5476 6.19876   2
   1  10  -4 37.2275 5.68332   4
  -1 -10   4 21.5347 4.13147   4
  -1 -10   4 34.7322 6.30287   2
  -1 -10   4 20.8613 4.88625   3
  -1 -10   4 26.5297 3.65541   1
   0  10  -4 2.64100 1.70339   4
   0  10  -4 1.96771 1.52560   1
   0  10  -4 2.84570 2.22460   2
   0 -10   4 1.01223 1.19092   1
   0 -10   4 2.11034 1.81571   2
   0 -10   4 4.60697 2.23353   4
   0 -10   4 1.15672 2.02393   3
  -1  10  -4 119.909 10.3922   2
  -1  10  -4 112.246 6.29294   1
  -1  10  -4 98.2020 7.10172   4
   1 -10   4 118.046 5.75576   1
   1 -10   4 132.001 7.98580   4
   1 -10   4 112.258 9.69829   3
   1 -10   4 100.908 8.51392   2
  -2  10  -4 400.253 12.7712   1
  -2  10  -4 386.594 18.7408   2
  -2  10  -4 417.719 15.8829   4
   2 -10   4 395.357 19.0683   3
   2 -10   4 409.020 11.9245   1
   2 -10   4 427.505 16.2739   4
  -3  10  -4 207.198 12.0496   2
  -3  10  -4 182.288 12.6114   2
   3 -10   4 177.109 10.3467   4
   3 -10   4 189.745 12.6838   3
   3 -10   4 193.933 6.21576   1
  -4  10  -4 489.229 18.4451   4
  -4  10  -4 531.722 23.5280   3
  -4  10  -4 492.392 23.2561   2
  -4  10  -4 501.032 21.0729   2
   4 -10   4 488.116 19.6024   4
  -5  10  -4 177.143 13.7896   2
  -5  10  -4 203.837 14.0990   3
  -5  10  -4 213.451 13.4893   2
   5 -10   4 200.425 12.2141   4
  -6  10  -4 132.426 10.5913   4
  -6  10  -4 114.606 16.0564   2
  -6  10  -4 124.412 10.9144   2
  -6  10  -4 123.809 11.0662   3
  -7  10  -4 201.060 14.2771   3
  -7  10  -4 183.670 14.4185   2
  -7  10  -4 188.630 13.4341   4
  -8  10  -4 588.863 29.0404   2
  -8  10  -4 628.772 27.4978   4
  -9  10  -4 353.581 21.0800   4
  -9  10  -4 384.565 23.8584   2
  -9  10  -4 354.790 19.6835   3
 -10  10  -4 436.134 27.0455   2
 -10  10  -4 405.895 23.7132   4
 -10  10  -4 430.242 21.7258   3
 -11  10  -4 201.029 18.9065   2
 -11  10  -4 185.644 16.7152   4
 -11  10  -4 188.025 13.7740   3
   8   9  -4 356.816 18.7527   1
   8   9  -4 359.834 26.8843   2
  -8  -9   4 357.285 18.6020   4
  -8  -9   4 354.521 18.1792   3
   7   9  -4 436.306 28.2667   2
   7   9  -4 461.547 20.9749   1
  -7  -9   4 457.034 20.6886   4
  -7  -9   4 476.753 21.3060   3
   6   9  -4 819.070 28.5387   1
   6   9  -4 787.642 37.2715   2
  -6  -9   4 759.598 25.6699   1
  -6  -9   4 787.644 32.7990   3
  -6  -9   4 843.082 28.8652   4
   5   9  -4 521.934 20.6747   1
   5   9  -4 497.585 26.9368   2
  -5  -9   4 545.485 19.3545   1
  -5  -9   4 539.167 20.7894   4
  -5  -9   4 522.853 22.3528   3
   4   9  -4 932.453 35.9744   2
   4   9  -4 855.413 28.0440   1
  -4  -9   4 890.394 26.6307   1
  -4  -9   4 868.902 30.8156   3
  -4  -9   4 891.167 28.2116   4
   3   9  -4 755.791 24.2039   1
   3   9  -4 743.873 29.7196   2
   3   9  -4 655.065 24.7786   4
  -3  -9   4 823.355 26.5748   1
  -3  -9   4 753.458 27.5641   3
  -3  -9   4 715.460 26.9113   2
  -3  -9   4 739.742 24.1777   4
   2   9  -4 1240.94 38.8719   2
   2   9  -4 1217.32 33.2824   1
   2   9  -4 1155.82 34.8324   4
  -2  -9   4 1178.93 36.4880   2
  -2  -9   4 1217.15 33.4668   4
  -2  -9   4 1177.31 31.6161   1
  -2  -9   4 1199.00 37.6212   3
   1   9  -4 1008.50 30.9656   4
   1   9  -4 1118.44 34.0670   2
   1   9  -4 1093.95 29.5708   1
  -1  -9   4 1046.03 32.6018   2
  -1  -9   4 1095.49 30.1685   4
  -1  -9   4 1041.01 28.0353   1
   0   9  -4 736.470 25.0248   2
   0   9  -4 734.810 22.6653   1
   0   9  -4 700.768 22.9339   4
   0  -9   4 704.843 26.2345   3
   0  -9   4 719.850 20.1239   1
   0  -9   4 742.594 24.9221   2
   0  -9   4 749.835 25.2488   4
  -1   9  -4 1105.78 32.7976   2
  -1   9  -4 1049.54 30.6983   4
  -1   9  -4 1142.63 28.2632   1
   1  -9   4 1084.03 34.8119   3
   1  -9   4 1064.51 32.9474   2
   1  -9   4 1122.19 33.8604   4
   1  -9   4 1127.63 27.2936   1
  -2   9  -4 440.880 18.9184   2
  -2   9  -4 439.814 17.7467   2
  -2   9  -4 420.773 15.9918   4
  -2   9  -4 449.073 13.0930   1
   2  -9   4 416.769 18.8748   3
   2  -9   4 460.905 12.4987   1
   2  -9   4 442.701 16.5444   4
  -3   9  -4 382.245 14.9754   4
  -3   9  -4 374.284 10.4852   1
  -3   9  -4 364.570 17.7905   2
  -3   9  -4 385.386 16.5669   2
   3  -9   4 386.109 15.7666   4
   3  -9   4 393.094 18.1105   3
   3  -9   4 386.003 10.0823   1
  -4   9  -4 755.583 24.4007   4
  -4   9  -4 788.598 29.5206   2
  -4   9  -4 794.958 29.3422   3
   4  -9   4 795.673 26.2981   4
  -5   9  -4 344.850 17.2886   2
  -5   9  -4 365.566 18.3337   3
  -5   9  -4 344.980 19.0171   2
  -5   9  -4 330.963 14.6213   4
   5  -9   4 337.516 16.1665   4
  -6   9  -4 103.105 9.72059   2
  -6   9  -4 98.4417 10.3542   2
  -6   9  -4 123.514 10.3359   3
  -6   9  -4 101.510 9.06695   4
  -7   9  -4 6.79159 3.70214   2
  -7   9  -4 8.39146 3.71502   3
  -7   9  -4 9.05377 3.81716   4
  -8   9  -4 47.2704 7.96539   3
  -8   9  -4 63.3896 10.8712   2
  -8   9  -4 65.8250 10.4414   4
  -9   9  -4 114.745 10.2975   3
  -9   9  -4 96.5962 13.4486   2
  -9   9  -4 119.458 14.6842   4
 -10   9  -4 4.76079 3.04869   3
 -10   9  -4 2.83087 3.33833   4
 -10   9  -4 3.91553 2.80169   2
 -11   9  -4 -0.1135 1.24138   3
 -11   9  -4 2.33782 3.42449   2
 -11   9  -4 3.05461 4.24789   4
  11  -9   4 1.56131 3.06396   2
   9   8  -4 18.6058 7.42357   2
   9   8  -4 12.1167 4.24230   1
  -9  -8   4 14.4496 4.03210   3
  -9  -8   4 14.5175 5.20433   4
   8   8  -4 4.39948 3.15235   1
   8   8  -4 3.21685 3.89913   2
  -8  -8   4 4.00324 2.85533   4
  -8  -8   4 3.08165 2.32766   3
   7   8  -4 11.8233 5.80860   2
  -7  -8   4 12.3094 3.86622   4
  -7  -8   4 14.5904 4.81002   3
   6   8  -4 33.1387 8.03027   2
   6   8  -4 42.1391 6.72812   1
  -6  -8   4 44.7295 7.05586   4
  -6  -8   4 33.6408 6.09393   3
  -6  -8   4 45.4829 6.66976   1
   5   8  -4 56.3083 7.11387   1
   5   8  -4 64.5434 11.1736   2
  -5  -8   4 62.9062 7.18778   1
  -5  -8   4 53.5748 6.88244   4
  -5  -8   4 65.3066 8.77512   3
   4   8  -4 255.023 13.7551   4
   4   8  -4 246.948 16.2693   2
   4   8  -4 233.439 11.9252   1
  -4  -8   4 248.598 12.4011   4
  -4  -8   4 239.520 14.0659   2
  -4  -8   4 261.686 13.9093   3
  -4  -8   4 254.188 11.3661   1
   3   8  -4 28.1657 5.10236   4
   3   8  -4 40.0620 7.89783   2
   3   8  -4 27.4878 4.49154   1
  -3  -8   4 27.6365 5.28017   2
  -3  -8   4 27.4972 4.67130   4
  -3  -8   4 27.4223 4.09322   1
  -3  -8   4 31.4446 5.99159   3
   2   8  -4 62.8355 5.20442   1
   2   8  -4 51.1466 6.45203   4
   2   8  -4 59.2702 7.96554   2
  -2  -8   4 64.2197 5.49106   4
  -2  -8   4 59.5735 4.71844   1
  -2  -8   4 57.2343 7.62241   2
   1   8  -4 787.497 22.5339   1
   1   8  -4 789.495 27.0340   3
   1   8  -4 766.969 25.5490   2
   1   8  -4 738.071 23.9822   4
  -1  -8   4 783.323 24.8503   2
  -1  -8   4 759.399 21.4729   1
   0   8  -4 733.447 25.7130   3
   0   8  -4 773.114 24.1743   2
   0   8  -4 728.898 23.0413   4
   0   8  -4 733.214 20.8450   1
   0  -8   4 729.295 25.4585   3
   0  -8   4 751.800 23.7210   2
   0  -8   4 758.981 22.5077   4
   0  -8   4 731.766 20.1355   1
  -1   8  -4 455.065 16.8612   2
  -1   8  -4 482.978 19.3909   3
  -1   8  -4 457.637 16.5366   4
  -1   8  -4 467.232 14.0415   1
   1  -8   4 462.967 17.2172   2
   1  -8   4 475.959 13.7887   1
   1  -8   4 451.880 16.2469   4
   1  -8   4 466.724 19.0971   3
  -2   8  -4 677.134 24.7839   3
  -2   8  -4 722.472 24.1560   2
  -2   8  -4 677.829 21.8519   4
  -2   8  -4 701.331 22.5016   2
  -2   8  -4 712.201 18.2242   1
   2  -8   4 717.841 24.7915   4
   2  -8   4 718.085 17.7897   1
   2  -8   4 718.401 25.2123   3
  -3   8  -4 1675.39 43.2669   4
  -3   8  -4 1728.92 48.3499   3
  -3   8  -4 1619.91 46.6069   3
  -3   8  -4 1717.63 47.2216   2
   3  -8   4 1729.53 44.4822   4
  -4   8  -4 1071.52 33.9730   3
  -4   8  -4 1095.65 33.5060   2
  -4   8  -4 1072.48 35.3067   2
  -4   8  -4 1115.70 35.4587   3
   4  -8   4 1090.99 32.7116   4
  -5   8  -4 935.339 31.2982   2
  -5   8  -4 886.335 32.7177   2
  -5   8  -4 885.925 30.9067   3
  -5   8  -4 874.727 27.3366   4
   5  -8   4 893.633 29.6702   4
  -6   8  -4 1403.06 42.5519   3
  -6   8  -4 1364.35 42.2684   4
  -6   8  -4 1410.18 44.3826   2
  -6   8  -4 1395.75 46.3630   2
  -7   8  -4 1180.73 38.3201   3
  -7   8  -4 1182.58 41.8253   2
  -7   8  -4 1211.74 39.5686   4
  -8   8  -4 489.853 21.6934   3
  -8   8  -4 438.737 25.8516   4
   8  -8   4 478.608 24.8126   2
  -9   8  -4 609.330 24.7621   3
  -9   8  -4 554.762 26.8476   4
   9  -8   4 598.389 32.4021   2
 -10   8  -4 562.563 24.2673   3
 -10   8  -4 607.111 29.1151   4
  10  -8   4 627.960 32.4279   2
 -11   8  -4 394.348 24.4464   4
 -11   8  -4 449.249 20.6215   3
  11  -8   4 445.546 28.4930   2
   9   7  -4 395.648 28.4546   2
   9   7  -4 411.195 19.9487   1
  -9  -7   4 408.454 17.3942   3
  -9  -7   4 421.536 21.4879   4
   8   7  -4 563.814 23.3071   1
   8   7  -4 562.231 32.7679   2
  -8  -7   4 572.978 21.8510   3
  -8  -7   4 595.722 24.7643   4
   7   7  -4 314.004 17.6376   1
   7   7  -4 286.652 21.3171   2
  -7  -7   4 303.436 17.7714   4
  -7  -7   4 294.684 14.5588   3
   6   7  -4 109.024 8.29227   1
   6   7  -4 92.6232 9.22306   3
   6   7  -4 74.6673 11.5863   2
  -6  -7   4 96.3214 7.12145   1
  -6  -7   4 112.707 8.49611   3
  -6  -7   4 86.1907 7.97945   4
   5   7  -4 1067.11 39.3490   2
   5   7  -4 995.509 32.2036   3
   5   7  -4 961.474 30.2525   1
  -5  -7   4 998.093 34.3099   2
  -5  -7   4 1020.10 29.3775   1
  -5  -7   4 1048.14 31.8795   3
  -5  -7   4 1015.38 31.8008   4
   4   7  -4 1418.51 45.4509   2
   4   7  -4 1492.44 39.0270   1
   4   7  -4 1377.32 41.0527   4
   4   7  -4 1419.21 40.9734   3
  -4  -7   4 1454.21 40.6809   3
  -4  -7   4 1418.68 37.3595   1
  -4  -7   4 1448.92 39.6313   4
  -4  -7   4 1433.56 42.1366   2
   3   7  -4 634.250 19.9866   1
   3   7  -4 582.675 21.4457   4
   3   7  -4 635.107 24.3836   2
   3   7  -4 578.481 21.7322   3
  -3  -7   4 569.972 21.4454   3
  -3  -7   4 611.895 20.4955   4
  -3  -7   4 609.647 21.8873   2
  -3  -7   4 582.040 18.7131   1
   2   7  -4 1232.90 35.7136   3
   2   7  -4 1234.86 36.1966   2
   2   7  -4 1134.44 33.9340   4
   2   7  -4 1225.40 32.2695   1
  -2  -7   4 1245.99 36.3062   4
  -2  -7   4 1231.54 34.3318   2
  -2  -7   4 1224.72 35.5507   3
  -2  -7   4 1211.18 31.3528   1
   1   7  -4 451.338 20.2940   3
   1   7  -4 489.867 15.4741   1
   1   7  -4 482.171 17.6752   2
   1   7  -4 468.173 16.9608   4
  -1  -7   4 491.640 18.8228   3
  -1  -7   4 470.944 16.5065   4
  -1  -7   4 486.326 16.8310   2
   0   7  -4 155.259 6.99777   1
   0   7  -4 140.115 8.07207   4
   0   7  -4 158.323 8.25070   2
   0  -7   4 158.330 8.07990   4
   0  -7   4 149.123 8.01664   2
   0  -7   4 151.547 6.62879   1
   0  -7   4 148.098 9.31704   3
  -1   7  -4 79.5536 4.39407   1
  -1   7  -4 81.2139 5.54427   2
  -1   7  -4 81.7025 5.81807   4
   1  -7   4 79.9908 4.19598   1
   1  -7   4 76.6011 6.65739   3
   1  -7   4 79.5359 5.70424   4
  -2   7  -4 9.68657 1.64518   1
  -2   7  -4 14.7170 4.20182   2
  -2   7  -4 10.4134 2.72473   4
  -2   7  -4 13.1996 2.96748   2
   2  -7   4 8.54128 2.77978   3
   2  -7   4 10.5071 1.60277   1
   2  -7   4 8.20736 2.34107   4
  -3   7  -4 84.7016 6.94762   2
  -3   7  -4 72.9609 3.05836   1
  -3   7  -4 74.9461 6.96962   3
  -3   7  -4 80.5513 5.77110   4
  -3   7  -4 70.4938 5.82776   2
  -3   7  -4 83.9808 7.07193   3
   3  -7   4 67.5865 7.89857   4
   3  -7   4 77.6503 3.12809   1
  -4   7  -4 6.86048 2.99931   3
  -4   7  -4 7.22073 2.81275   2
  -4   7  -4 9.50221 2.81532   4
  -4   7  -4 3.45352 2.21821   2
  -4   7  -4 3.96970 2.07672   3
   4  -7   4 1.97531 1.82567   4
  -5   7  -4 5.79721 2.92214   3
  -5   7  -4 4.67107 2.57381   2
  -5   7  -4 13.9503 3.42903   4
  -5   7  -4 5.67479 2.69265   2
  -5   7  -4 7.42097 2.66600   3
   5  -7   4 6.32247 2.60487   4
  -6   7  -4 63.3012 8.12966   4
  -6   7  -4 80.0021 11.4540   2
  -6   7  -4 73.6779 6.81753   3
  -6   7  -4 71.2443 7.22505   3
   6  -7   4 73.5191 10.0246   2
  -7   7  -4 435.675 23.4974   2
  -7   7  -4 446.802 21.0637   4
  -7   7  -4 456.621 19.0746   3
  -7   7  -4 500.588 20.7346   3
   7  -7   4 494.666 23.6904   2
  -8   7  -4 247.685 15.8486   4
  -8   7  -4 244.689 14.0163   3
   8  -7   4 260.356 17.8674   2
  -9   7  -4 147.845 12.9516   4
  -9   7  -4 167.951 11.5421   3
   9  -7   4 197.573 16.4311   2
 -10   7  -4 143.876 16.5027   4
 -10   7  -4 138.195 10.5188   3
  10  -7   4 148.719 19.9039   2
 -11   7  -4 29.5111 7.19611   4
 -11   7  -4 54.5904 8.24322   3
  11  -7   4 44.0125 11.4849   2
 -12   7  -4 247.738 19.3418   4
 -12   7  -4 243.924 14.0432   3
  10   6  -4 6.15276 4.96097   2
  10   6  -4 0.59550 1.97116   1
 -10  -6   4 3.25688 1.97926   3
 -10  -6   4 4.15603 3.09716   4
   9   6  -4 9.64802 3.13235   3
   9   6  -4 2.60191 2.53096   1
   9   6  -4 9.61405 4.85513   2
  -9  -6   4 6.39896 2.55092   3
  -9  -6   4 2.66782 2.39465   4
   8   6  -4 54.6713 7.37050   3
   8   6  -4 53.9853 7.95354   1
   8   6  -4 51.6658 12.5463   2
  -8  -6   4 50.1233 8.35961   4
  -8  -6   4 55.1307 7.30084   3
   7   6  -4 122.456 9.16002   1
   7   6  -4 120.847 16.6460   2
   7   6  -4 123.118 8.66177   3
  -7  -6   4 118.310 8.28333   3
  -7  -6   4 107.528 9.35870   4
   6   6  -4 367.946 16.0062   1
   6   6  -4 350.184 21.5406   2
  -6  -6   4 378.638 15.7547   3
  -6  -6   4 366.341 14.8875   1
  -6  -6   4 398.716 17.7082   4
   5   6  -4 537.305 25.3865   2
   5   6  -4 531.530 19.2545   1
   5   6  -4 534.324 19.8308   3
   5   6  -4 534.040 21.8927   4
  -5  -6   4 551.644 20.6294   4
  -5  -6   4 533.106 18.2843   1
  -5  -6   4 517.173 22.1406   2
  -5  -6   4 550.408 19.7328   3
   4   6  -4 102.767 7.52288   3
   4   6  -4 103.264 6.93358   1
   4   6  -4 87.3547 7.45603   4
  -4  -6   4 98.3774 7.31097   3
  -4  -6   4 102.998 6.47697   1
  -4  -6   4 97.8652 7.89005   2
  -4  -6   4 93.2397 7.23180   4
   3   6  -4 265.559 12.5808   3
   3   6  -4 302.601 14.9370   2
   3   6  -4 260.324 11.2772   1
   3   6  -4 277.529 13.0826   4
  -3  -6   4 279.555 12.9752   2
  -3  -6   4 294.700 11.2784   1
  -3  -6   4 287.872 12.5011   4
  -3  -6   4 271.468 12.6168   3
   2   6  -4 1168.24 33.1423   2
   2   6  -4 1127.42 29.7919   1
   2   6  -4 1133.13 32.6320   3
   2   6  -4 1153.42 32.2196   4
  -2  -6   4 1153.68 31.3516   2
  -2  -6   4 1109.00 29.2018   1
  -2  -6   4 1107.10 30.8919   4
   1   6  -4 2435.69 64.0413   6
   1   6  -4 2487.43 60.3629   5
  -1  -6   4 2440.18 59.1749   5
  -1  -6   4 2453.09 63.9373   6
   0   6  -4 1962.69 49.8956   3
  -1   6  -4 1239.35 34.4581   3
  -1   6  -4 1174.50 31.8716   4
  -1   6  -4 1238.10 31.3552   2
   1  -6   4 1217.16 28.6729   1
  -2   6  -4 1252.62 35.3638   3
  -2   6  -4 1243.57 33.5476   2
  -2   6  -4 1278.05 29.0001   1
  -2   6  -4 1323.96 36.7039   3
  -2   6  -4 1247.57 33.1282   4
   2  -6   4 1280.40 33.9067   4
  -3   6  -4 1475.98 38.1666   4
  -3   6  -4 1512.96 41.4555   3
  -3   6  -4 1491.53 40.2839   3
   3  -6   4 1480.84 39.2487   4
  -4   6  -4 1613.88 43.2345   3
  -4   6  -4 1576.06 41.2147   4
  -4   6  -4 1642.77 44.4359   3
  -4   6  -4 1590.48 44.6985   2
  -5   6  -4 2580.64 67.9861   2
  -5   6  -4 2590.22 64.2224   3
  -6   6  -4 1397.87 39.6148   3
  -6   6  -4 1362.07 41.7782   4
  -6   6  -4 1395.82 44.9883   2
  -6   6  -4 1402.93 41.8720   4
  -6   6  -4 1448.30 40.9175   3
   6  -6   4 1390.31 43.9794   2
  -7   6  -4 659.066 23.3921   3
  -7   6  -4 683.958 26.7002   4
  -7   6  -4 622.180 28.1594   2
  -7   6  -4 662.367 24.2386   3
   7  -6   4 702.946 29.2372   2
  -8   6  -4 359.949 16.9091   3
  -8   6  -4 376.132 19.6120   4
  -8   6  -4 334.485 15.6405   3
   8  -6   4 359.172 21.4263   2
  -9   6  -4 477.250 23.9661   4
  -9   6  -4 473.075 20.0921   3
   9  -6   4 464.157 26.5702   2
 -10   6  -4 171.124 11.4795   3
 -10   6  -4 178.394 14.8549   4
  10  -6   4 175.380 16.9845   2
  10  -6   4 176.467 6.34552   1
  10  -6   4 182.864 5.92631   1
 -11   6  -4 204.503 12.6261   3
 -11   6  -4 219.030 17.3442   4
  11  -6   4 209.130 19.4637   2
  11  -6   4 206.503 7.46736   1
  11  -6   4 227.106 7.09415   1
 -12   6  -4 379.548 24.0941   4
 -12   6  -4 343.332 16.7486   3
  12  -6   4 369.765 50.3081   2
  12  -6   4 371.417 10.5308   1
  12  -6   4 368.059 11.1018   1
  11   5  -4 427.089 31.6980   2
  11   5  -4 407.661 20.5063   1
 -11  -5   4 414.259 23.1937   4
  10   5  -4 549.036 23.4537   1
  10   5  -4 552.363 34.7588   2
 -10  -5   4 543.957 25.9897   4
   9   5  -4 424.484 28.2642   2
   9   5  -4 423.021 15.8431   3
   9   5  -4 404.132 18.8084   1
  -9  -5   4 404.516 20.9138   4
   8   5  -4 251.065 13.7153   1
   8   5  -4 247.737 11.8635   3
   8   5  -4 283.154 21.3933   2
  -8  -5   4 300.693 13.6767   3
  -8  -5   4 283.363 16.1199   4
   7   5  -4 137.868 13.7801   2
   7   5  -4 132.909 8.30067   3
   7   5  -4 146.380 9.60403   1
  -7  -5   4 146.717 10.6208   4
   6   5  -4 358.116 21.1774   2
   6   5  -4 355.556 15.1489   1
   6   5  -4 345.512 14.4376   3
  -6  -5   4 365.403 14.3819   1
  -6  -5   4 329.015 17.7458   2
  -6  -5   4 371.272 15.7023   3
  -6  -5   4 392.802 17.1276   4
   5   5  -4 754.624 24.1328   3
   5   5  -4 830.421 24.9395   1
   5   5  -4 832.789 31.7622   2
   5   5  -4 729.613 26.8572   4
  -5  -5   4 802.363 23.7487   1
  -5  -5   4 797.939 24.2365   3
  -5  -5   4 776.486 27.7437   2
  -5  -5   4 831.523 26.6508   4
   4   5  -4 762.913 27.8833   2
   4   5  -4 740.552 22.3559   1
   4   5  -4 716.802 24.6369   4
   4   5  -4 715.554 22.6707   3
  -4  -5   4 734.803 23.7175   4
  -4  -5   4 737.461 25.0025   2
  -4  -5   4 709.825 21.3957   1
  -4  -5   4 702.847 22.3864   3
   3   5  -4 340.500 13.6084   3
   3   5  -4 362.879 14.2642   1
   3   5  -4 364.986 15.8275   2
   3   5  -4 323.054 14.1554   4
  -3  -5   4 350.908 12.3730   1
  -3  -5   4 355.683 13.7631   3
  -3  -5   4 323.365 13.7399   2
   2   5  -4 5.85434 2.20020   3
   2   5  -4 6.04050 2.21707   4
   2   5  -4 4.39283 1.89441   2
   2   5  -4 3.44428 1.30378   1
  -2  -5   4 12.6225 3.19754   3
  -2  -5   4 2.12176 1.07916   1
  -2  -5   4 1.59929 1.18215   4
  -2  -5   4 2.10890 1.18688   2
   1   5  -4 323.935 11.3224   2
   1   5  -4 306.970 12.5092   3
   1   5  -4 298.198 10.5062   1
   1   5  -4 306.576 12.2012   4
  -1  -5   4 312.764 12.6740   3
  -1  -5   4 285.481 10.1436   1
  -1  -5   4 320.076 10.6885   2
  -1  -5   4 310.656 11.9056   4
   0   5  -4 267.396 10.9577   4
   0   5  -4 264.571 11.4896   3
   0   5  -4 280.505 9.25380   1
   0   5  -4 278.204 8.87874   2
   0  -5   4 275.560 10.8456   4
   0  -5   4 258.612 11.5276   3
   0  -5   4 256.715 8.68889   2
   0  -5   4 262.982 8.87361   1
  -1   5  -4 301.207 11.6307   4
  -1   5  -4 289.483 9.87882   2
  -1   5  -4 305.742 9.23599   1
  -1   5  -4 316.047 13.2560   3
  -1   5  -4 304.366 9.50621   2
   1  -5   4 311.434 11.7978   4
   1  -5   4 305.270 9.23030   1
  -2   5  -4 57.5976 5.09038   3
  -2   5  -4 56.3754 4.02763   2
  -2   5  -4 57.6488 4.50573   4
  -2   5  -4 59.4205 5.47077   3
  -2   5  -4 52.5286 2.74577   1
  -2   5  -4 51.8307 4.16363   2
   2  -5   4 64.3062 4.96656   4
  -3   5  -4 503.412 16.8879   4
  -3   5  -4 521.458 19.0243   3
  -3   5  -4 523.089 18.1565   3
  -3   5  -4 533.710 18.4629   2
   3  -5   4 530.183 17.6362   2
   3  -5   4 535.629 12.9818   1
   3  -5   4 561.713 18.4059   4
  -4   5  -4 357.613 13.8234   4
  -4   5  -4 356.508 14.5773   3
  -4   5  -4 362.273 15.9737   2
   4  -5   4 368.733 15.5547   2
   4  -5   4 355.300 14.8723   4
   4  -5   4 359.349 8.78939   1
   4  -5   4 375.215 9.23202   1
  -5   5  -4 191.712 10.3268   3
  -5   5  -4 193.420 10.9434   3
  -5   5  -4 222.279 13.0836   2
  -5   5  -4 191.208 11.8981   4
   5  -5   4 213.169 11.6591   4
   5  -5   4 211.748 5.88002   1
   5  -5   4 214.330 5.92929   1
   5  -5   4 203.592 12.4158   2
  -6   5  -4 574.899 25.0626   2
  -6   5  -4 582.440 21.2412   4
  -6   5  -4 602.904 21.0468   3
  -6   5  -4 649.160 24.1922   4
  -6   5  -4 608.184 21.9473   3
   6  -5   4 646.385 14.6157   1
   6  -5   4 583.609 25.1276   2
  -7   5  -4 299.984 16.2477   4
  -7   5  -4 310.778 14.6948   3
  -7   5  -4 277.565 17.5215   2
  -7   5  -4 261.921 18.7826   3
   7  -5   4 298.800 8.88318   1
   7  -5   4 295.663 18.1274   2
   7  -5   4 306.996 8.43013   1
  -8   5  -4 424.036 17.3810   3
  -8   5  -4 427.235 21.1542   4
  -8   5  -4 455.517 18.6321   3
   8  -5   4 415.317 11.4722   1
   8  -5   4 424.857 23.8632   2
   8  -5   4 435.657 12.3800   1
  -9   5  -4 348.311 19.9169   4
  -9   5  -4 335.232 15.9884   3
  -9   5  -4 329.577 15.3207   3
   9  -5   4 350.651 22.8815   2
   9  -5   4 348.735 11.1340   1
 -10   5  -4 435.772 23.8178   4
 -10   5  -4 423.312 18.6105   3
  10  -5   4 411.347 13.3467   1
  10  -5   4 409.812 26.7728   2
 -11   5  -4 238.890 18.1945   4
 -11   5  -4 254.687 13.7737   3
  11  -5   4 268.407 10.2325   1
  11  -5   4 240.891 21.3160   2
 -12   5  -4 305.276 14.9852   3
 -12   5  -4 275.278 20.4041   4
  12  -5   4 323.921 49.2742   2
  12  -5   4 295.981 11.4715   1
  11   4  -4 196.309 13.2844   1
  11   4  -4 171.791 23.1465   2
 -11  -4   4 202.141 27.0201   4
  10   4  -4 482.859 32.1288   2
  10   4  -4 579.973 23.4695   1
 -10  -4   4 579.345 26.4617   4
   9   4  -4 333.624 16.3610   1
   9   4  -4 351.135 25.1862   2
   9   4  -4 343.744 12.4361   3
  -9  -4   4 348.497 18.9844   4
   8   4  -4 112.636 6.67645   3
   8   4  -4 135.578 9.32582   1
   8   4  -4 155.991 20.6141   2
  -8  -4   4 109.302 6.48024   3
  -8  -4   4 107.944 16.3966   4
   7   4  -4 869.276 24.9122   3
   7   4  -4 919.569 28.1148   1
   7   4  -4 838.649 36.5011   2
  -7  -4   4 882.392 24.6155   3
  -7  -4   4 846.339 30.0553   4
   6   4  -4 943.424 28.7289   1
   6   4  -4 1003.78 37.8314   2
   6   4  -4 981.220 27.3378   3
  -6  -4   4 940.567 33.6657   2
  -6  -4   4 922.545 27.6751   1
  -6  -4   4 1016.80 27.1651   3
  -6  -4   4 1043.39 32.0035   4
   5   4  -4 1244.17 33.4192   1
   5   4  -4 1245.41 41.0255   2
   5   4  -4 1193.30 36.5749   4
   5   4  -4 1255.87 32.3929   3
  -5  -4   4 1221.19 35.3602   4
  -5  -4   4 1208.00 37.4495   2
  -5  -4   4 1190.10 32.3881   1
   4   4  -4 1559.53 43.3787   4
  -4  -4   4 1655.49 44.0418   2
   3   4  -4 4066.58 95.0663   6
   3   4  -4 4187.52 99.0332   5
  -3  -4   4 4142.52 95.1528   6
  -3  -4   4 4151.90 96.2197   5
   2   4  -4 5362.98 119.315   5
   2   4  -4 5360.54 119.600   6
  -2  -4   4 5216.84 117.031   5
  -2  -4   4 5333.30 119.657   6
   1   4  -4 3478.81 82.1742   6
   1   4  -4 3561.86 77.5769   5
  -1  -4   4 3512.73 81.9925   6
  -1  -4   4 3420.73 76.3317   5
   0   4  -4 1503.03 40.9249   6
   0   4  -4 1528.75 41.9835   6
  -1   4  -4 4502.87 95.3150   5
  -1   4  -4 4502.25 104.002   6
  -1   4  -4 4420.78 102.461   6
  -2   4  -4 1402.53 40.9597   6
  -2   4  -4 1431.06 39.9857   6
  -2   4  -4 1488.05 36.6892   5
   2  -4   4 1439.13 36.0638   5
  -3   4  -4 3969.44 95.6354   6
  -3   4  -4 4053.09 94.3831   6
  -3   4  -4 4069.39 93.4724   5
   3  -4   4 4014.32 93.4484   5
  -4   4  -4 2743.07 68.8477   6
  -4   4  -4 2728.44 69.2333   5
   4  -4   4 2639.25 67.3177   6
   4  -4   4 2602.21 68.9532   5
  -5   4  -4 1667.32 46.9090   2
  -5   4  -4 1598.78 44.2907   4
  -5   4  -4 1672.45 46.6469   3
   5  -4   4 1551.29 42.2177   3
   5  -4   4 1651.57 47.1950   2
  -6   4  -4 1021.68 31.0666   4
  -6   4  -4 1025.95 33.2921   4
  -6   4  -4 1049.56 31.2278   3
  -6   4  -4 1016.38 35.3355   2
   6  -4   4 1043.81 30.5640   3
   6  -4   4 1054.35 36.5263   2
  -7   4  -4 1032.45 31.4003   3
  -7   4  -4 1022.72 34.7612   4
  -7   4  -4 1017.68 37.3794   2
   7  -4   4 1053.25 38.7838   2
   7  -4   4 1061.28 25.2828   1
   7  -4   4 940.511 30.0826   3
  -8   4  -4 266.275 13.3875   3
  -8   4  -4 240.439 15.4042   4
   8  -4   4 255.891 18.3600   2
   8  -4   4 255.891 9.36783   1
   8  -4   4 245.255 12.6198   3
  -9   4  -4 469.767 18.7909   3
  -9   4  -4 482.432 19.7107   3
  -9   4  -4 488.213 23.9963   4
   9  -4   4 516.333 28.6039   2
   9  -4   4 474.685 15.1821   1
 -10   4  -4 45.0189 9.22835   4
 -10   4  -4 41.7453 6.56116   3
 -10   4  -4 32.7804 6.61684   3
  10  -4   4 53.9319 12.0891   2
  10  -4   4 43.5979 4.95078   1
 -11   4  -4 67.4235 8.84267   3
 -11   4  -4 77.6647 12.5736   4
  11  -4   4 82.3958 16.9643   2
  11  -4   4 60.0348 5.17371   1
 -12   4  -4 70.7749 12.4138   4
 -12   4  -4 49.5397 7.28798   3
  12  -4   4 59.1563 5.35987   1
  11   3  -4 300.778 25.6054   2
  11   3  -4 300.534 16.3725   1
 -11  -3   4 317.903 19.9625   4
  10   3  -4 364.969 26.5965   2
  10   3  -4 361.278 17.3073   1
 -10  -3   4 334.599 19.7113   4
   9   3  -4 235.576 13.1519   1
   9   3  -4 263.581 21.1820   2
  -9  -3   4 244.545 15.6410   4
   8   3  -4 15.9314 4.19390   1
   8   3  -4 18.3975 6.91017   2
   8   3  -4 13.7134 2.39782   3
  -8  -3   4 17.9578 5.16512   4
   7   3  -4 377.663 15.5181   1
   7   3  -4 382.451 22.5584   2
  -7  -3   4 386.132 18.1212   4
  -7  -3   4 379.505 12.3938   3
   6   3  -4 145.498 8.34982   1
   6   3  -4 153.309 12.7481   2
   6   3  -4 130.498 9.93615   4
  -6  -3   4 143.658 6.71948   3
  -6  -3   4 133.094 7.68000   1
  -6  -3   4 123.568 10.8560   2
  -6  -3   4 149.087 9.93378   4
   5   3  -4 18.8603 5.73255   2
   5   3  -4 14.2214 3.14571   1
   5   3  -4 19.1555 4.14198   4
   5   3  -4 24.9598 4.30575   3
  -5  -3   4 19.6794 3.15105   3
  -5  -3   4 19.7390 4.90330   2
  -5  -3   4 14.9219 2.81931   1
  -5  -3   4 14.4325 3.42547   4
   4   3  -4 190.601 8.89878   3
   4   3  -4 171.356 11.0663   2
   4   3  -4 167.723 9.75766   4
  -4  -3   4 182.120 10.2995   2
  -4  -3   4 169.522 9.25607   4
  -4  -3   4 168.801 7.56583   3
   3   3  -4 48.3744 3.84589   1
   3   3  -4 41.3324 4.03335   3
   3   3  -4 47.8118 4.93196   2
   3   3  -4 48.8396 5.61091   4
  -3  -3   4 39.0615 4.60059   4
  -3  -3   4 52.2502 3.93836   3
  -3  -3   4 38.2625 3.33914   1
   2   3  -4 779.513 22.4243   2
   2   3  -4 805.437 23.3110   4
   2   3  -4 774.966 21.5867   3
   2   3  -4 822.046 22.2801   3
   1   3  -4 1431.09 37.8619   6
   1   3  -4 1421.95 33.1704   5
   1   3  -4 1409.56 37.1162   6
  -1  -3   4 1381.61 32.3114   5
   0   3  -4 231.179 9.36714   4
   0   3  -4 232.065 9.35378   3
   0   3  -4 229.280 7.62407   1
   0   3  -4 239.882 9.88934   3
  -1   3  -4 665.995 18.5475   4
   1  -3   4 601.035 18.7310   3
  -2   3  -4 272.869 11.5829   3
  -2   3  -4 306.789 8.22168   1
  -2   3  -4 302.531 10.4027   2
   2  -3   4 283.258 11.4407   3
   2  -3   4 292.605 10.5231   2
   2  -3   4 302.768 8.40162   1
   2  -3   4 318.181 11.5261   4
  -3   3  -4 779.081 23.2455   2
  -3   3  -4 762.988 23.3634   3
   3  -3   4 780.596 22.9660   3
   3  -3   4 754.968 22.8387   4
   3  -3   4 787.785 23.7538   2
  -4   3  -4 2085.19 55.7727   5
  -4   3  -4 2012.87 54.0172   6
   4  -3   4 1966.35 53.3833   6
   4  -3   4 2088.71 56.5976   5
  -5   3  -4 2061.95 50.7710   4
  -5   3  -4 2004.69 54.7177   2
   5  -3   4 1966.09 50.1064   3
  -6   3  -4 1340.73 39.6298   4
  -6   3  -4 1321.05 42.3611   2
  -6   3  -4 1380.22 37.8627   3
   6  -3   4 1384.24 44.2855   2
   6  -3   4 1282.83 36.4751   3
  -7   3  -4 1612.21 43.9460   3
  -7   3  -4 1643.37 47.9209   4
  -7   3  -4 1555.13 50.4296   2
   7  -3   4 1683.74 53.6051   2
   7  -3   4 1599.72 43.3398   3
  -8   3  -4 893.365 32.8910   4
  -8   3  -4 908.029 28.8980   3
   8  -3   4 907.859 38.2270   2
   8  -3   4 907.732 24.2084   1
   8  -3   4 824.453 27.7648   3
  -9   3  -4 740.130 25.4730   3
  -9   3  -4 732.032 30.3928   4
   9  -3   4 732.564 35.8682   2
   9  -3   4 760.231 21.8158   1
   9  -3   4 690.428 24.6782   3
 -10   3  -4 581.660 22.0235   3
 -10   3  -4 577.211 27.6881   4
  10  -3   4 570.127 18.8440   1
  10  -3   4 544.190 24.0537   3
  10  -3   4 558.649 32.5150   2
 -11   3  -4 780.323 34.6843   4
 -11   3  -4 805.783 27.5916   3
  11  -3   4 806.829 42.2859   2
  11  -3   4 811.928 25.0246   1
 -12   3  -4 518.605 28.1515   4
 -12   3  -4 465.040 19.6643   3
  12  -3   4 508.912 18.9459   1
  12  -3   4 515.182 36.3543   2
  12   2  -4 286.285 25.8270   2
  12   2  -4 282.202 16.1197   1
 -12  -2   4 306.535 20.2067   4
  11   2  -4 365.690 17.8104   1
  11   2  -4 363.705 27.8418   2
 -11  -2   4 390.054 22.0685   4
  10   2  -4 778.326 40.4848   2
  10   2  -4 852.661 28.7256   1
 -10  -2   4 832.844 33.1424   4
   9   2  -4 1483.18 41.6344   1
  -9  -2   4 1469.97 46.8393   4
   8   2  -4 1016.50 31.0242   1
   8   2  -4 1023.28 42.2868   2
  -8  -2   4 1089.06 35.9340   4
   7   2  -4 1637.06 54.2833   2
  -7  -2   4 1691.07 47.3657   4
  -7  -2   4 1597.43 51.4152   2
   6   2  -4 898.263 30.7695   4
   6   2  -4 924.294 22.9666   3
   6   2  -4 964.305 35.7407   2
   6   2  -4 974.169 27.4198   1
  -6  -2   4 993.684 37.4257   2
  -6  -2   4 938.192 30.1804   4
   5   2  -4 4550.53 98.6872   6
   5   2  -4 4583.18 114.177   5
   5   2  -4 4499.20 98.9471   6
  -5  -2   4 4465.24 111.315   5
   4   2  -4 2467.79 56.1738   6
   4   2  -4 2391.01 56.4315   6
   4   2  -4 2493.60 66.3929   5
  -4  -2   4 2413.64 64.1375   5
   3   2  -4 3583.18 79.5374   6
   3   2  -4 3507.02 78.9528   6
   3   2  -4 3500.83 84.6524   5
  -3  -2   4 3549.30 83.7720   5
   2   2  -4 3500.07 78.3405   6
   2   2  -4 3447.10 78.7761   6
   2   2  -4 3509.95 79.8356   5
  -2  -2   4 3474.87 79.1803   5
   1   2  -4 1059.28 29.4690   6
  -1  -2   4 1070.52 29.0213   6
  -1  -2   4 1087.20 26.0940   5
   0   2  -4 1935.32 48.1621   6
  -1   2  -4 3595.00 76.0596   5
  -1   2  -4 3497.99 81.6449   6
   1  -2   4 3452.88 80.9969   6
   1  -2   4 3481.30 76.2329   5
  -2   2  -4 2493.91 58.5327   5
  -2   2  -4 2553.58 61.8623   6
   2  -2   4 2492.22 59.2673   5
   2  -2   4 2455.32 61.0120   6
  -3   2  -4 3241.89 79.5219   5
  -3   2  -4 3124.18 76.1627   6
   3  -2   4 3085.77 76.4197   5
   3  -2   4 3127.88 75.3708   6
  -4   2  -4 940.203 26.9949   4
  -4   2  -4 1006.72 30.1820   2
   4  -2   4 939.144 27.2941   3
   4  -2   4 969.139 30.9045   2
  -5   2  -4 7.35865 2.14280   4
  -5   2  -4 1.83927 1.53476   3
  -5   2  -4 0.07418 1.17159   2
  -5   2  -4 6.61961 2.26080   4
   5  -2   4 3.30275 1.13885   1
   5  -2   4 4.41391 2.79285   2
   5  -2   4 7.61467 2.63951   3
  -6   2  -4 21.3562 4.42206   4
  -6   2  -4 15.7356 3.75438   3
  -6   2  -4 18.9592 4.94578   4
  -6   2  -4 13.3923 4.71312   2
   6  -2   4 12.5139 3.31920   3
   6  -2   4 12.5196 4.24747   2
  -7   2  -4 32.9449 5.88462   4
  -7   2  -4 37.5223 8.14808   2
  -7   2  -4 38.7450 5.83503   3
   7  -2   4 42.6664 4.57685   1
   7  -2   4 27.7021 6.10984   2
   7  -2   4 46.1366 6.45594   3
  -8   2  -4 373.982 19.4151   4
  -8   2  -4 373.222 16.3301   3
   8  -2   4 394.669 13.7374   1
   8  -2   4 360.473 15.9128   3
   8  -2   4 391.718 23.8988   2
  -9   2  -4 -1.7316 0.95722   4
  -9   2  -4 2.10219 2.07446   3
   9  -2   4 -0.3692 1.63632   3
   9  -2   4 0.65776 1.39487   1
 -10   2  -4 -0.5186 1.74196   4
 -10   2  -4 -0.0244 1.44916   3
  10  -2   4 -0.6233 1.64307   2
  10  -2   4 2.13714 1.60208   1
 -11   2  -4 23.3787 7.04141   4
 -11   2  -4 30.8304 6.44921   3
  11  -2   4 24.5684 8.61565   2
  11  -2   4 18.1327 3.87048   1
 -12   2  -4 66.3180 11.7596   4
 -12   2  -4 58.7938 7.79113   3
  12  -2   4 47.9918 6.62061   1
  12  -2   4 63.5602 14.9987   2
  12   1  -4 37.6130 10.6762   2
  12   1  -4 36.3886 6.31197   1
 -12  -1   4 28.7721 7.40302   4
  11   1  -4 10.4048 3.62610   1
  11   1  -4 5.34675 4.76074   2
 -11  -1   4 6.20873 3.62774   4
  10   1  -4 1.93848 3.59411   2
  10   1  -4 1.20920 1.97723   1
 -10  -1   4 0.04120 2.15296   4
   9   1  -4 4.68745 4.07552   2
   9   1  -4 0.86765 1.67218   1
  -9  -1   4 9.08684 3.89336   4
   8   1  -4 54.9114 11.3652   2
   8   1  -4 30.3372 4.52060   1
  -8  -1   4 42.0773 7.30817   4
   7   1  -4 12.4749 4.51272   1
   7   1  -4 9.88527 4.80781   2
  -7  -1   4 10.1411 3.58830   4
  -7  -1   4 12.3925 4.48012   2
   6   1  -4 108.080 8.44837   4
   6   1  -4 106.617 6.66261   1
   6   1  -4 121.249 10.8952   2
  -6  -1   4 110.670 8.36135   4
  -6  -1   4 111.924 9.89261   2
   5   1  -4 166.564 7.97151   1
   5   1  -4 161.302 9.76658   4
   5   1  -4 164.289 11.6494   2
  -5  -1   4 149.163 7.40396   1
  -5  -1   4 174.498 11.4546   2
   4   1  -4 806.326 27.3441   2
   4   1  -4 834.049 25.3198   4
  -4  -1   4 841.981 27.3187   2
  -4  -1   4 826.444 24.7316   4
  -4  -1   4 809.228 22.1421   1
   3   1  -4 1293.51 38.1212   5
   3   1  -4 1340.72 32.4287   6
   3   1  -4 1317.95 31.9864   6
  -3  -1   4 1340.96 41.5751   5
   2   1  -4 1898.63 45.1136   6
   2   1  -4 1926.94 47.4194   5
  -2  -1   4 1878.32 47.3207   5
  -2  -1   4 1893.83 44.8515   6
   1   1  -4 3875.30 86.6553   6
  -1  -1   4 3906.40 85.3650   5
  -1  -1   4 3874.59 86.3480   6
  -1  -1   4 3829.90 84.9266   5
   0   1  -4 296.842 8.62849   1
   0   1  -4 292.004 10.4624   3
   0   1  -4 293.656 9.07957   2
   0   1  -4 301.621 10.2982   4
   0  -1   4 276.338 10.1887   3
   0  -1   4 289.129 8.61896   1
   0  -1   4 292.110 10.0044   4
   0  -1   4 291.086 8.97297   2
  -1   1  -4 4401.59 101.455   6
  -1   1  -4 4604.95 98.6329   5
   1  -1   4 4469.41 101.003   6
   1  -1   4 4471.50 98.3672   5
  -2   1  -4 1782.69 46.0396   6
  -2   1  -4 1743.19 44.5255   5
   2  -1   4 1719.48 45.4667   6
   2  -1   4 1802.54 45.4465   5
  -3   1  -4 459.754 15.9455   3
  -3   1  -4 460.257 16.7827   2
  -3   1  -4 473.594 15.0965   4
   3  -1   4 454.829 17.5515   2
   3  -1   4 472.472 12.2372   1
   3  -1   4 445.029 15.5376   3
   3  -1   4 459.460 15.6025   4
  -4   1  -4 2440.20 65.5172   5
  -4   1  -4 2551.07 63.5929   6
   4  -1   4 2513.12 67.7109   5
   4  -1   4 2449.76 62.8389   6
  -5   1  -4 1157.74 36.9774   2
  -5   1  -4 1200.25 33.2319   4
  -5   1  -4 1230.32 34.9436   4
   5  -1   4 1187.70 43.2105   2
   5  -1   4 1181.44 33.0587   3
  -6   1  -4 2248.19 56.1067   4
  -6   1  -4 2138.49 61.3531   2
   6  -1   4 2228.76 55.5170   3
  -7   1  -4 1222.20 38.2957   4
  -7   1  -4 1195.93 34.7917   3
   7  -1   4 1155.80 34.2470   3
   7  -1   4 1152.75 30.6464   1
   7  -1   4 1211.47 44.9563   2
  -8   1  -4 672.007 27.1806   4
  -8   1  -4 670.559 23.4870   3
   8  -1   4 669.138 20.6714   1
   8  -1   4 628.839 22.9373   3
  -9   1  -4 523.760 24.8361   4
  -9   1  -4 541.861 20.9314   3
   9  -1   4 509.078 30.3711   2
   9  -1   4 519.151 18.3685   1
   9  -1   4 529.237 20.7020   3
 -10   1  -4 503.719 25.3579   4
 -10   1  -4 489.305 20.3748   3
  10  -1   4 509.582 32.3778   2
  10  -1   4 515.231 26.9728   1
 -11   1  -4 518.852 21.1931   3
 -11   1  -4 514.076 26.9004   4
  11  -1   4 491.477 33.5746   2
  11  -1   4 532.377 20.1669   1
 -12   1  -4 549.692 29.1010   4
 -12   1  -4 466.695 20.1669   3
  12  -1   4 619.853 39.3708   2
  12  -1   4 533.939 21.2741   1
  12   0  -4 451.156 19.7245   1
 -12   0   4 500.499 26.0851   4
  11   0  -4 720.699 39.8636   2
  11   0  -4 792.376 26.7434   1
 -11   0   4 746.314 32.0613   4
  10   0  -4 579.358 32.9114   2
  10   0  -4 536.503 20.3850   1
 -10   0   4 534.983 25.2055   4
   9   0  -4 463.113 17.5063   1
   9   0  -4 421.632 26.2443   2
  -9   0   4 410.809 23.5091   4
   8   0  -4 1284.64 48.0422   2
   8   0  -4 1329.06 35.9412   1
  -8   0   4 1318.84 40.9902   4
   7   0  -4 1597.69 52.2489   2
  -7   0   4 1588.46 45.3421   4
  -7   0   4 1564.32 51.0793   2
   6   0  -4 2555.45 66.5726   4
  -6   0   4 2734.27 72.5933   2
   5   0  -4 1398.92 39.2874   4
  -5   0   4 1450.58 43.5328   2
   4   0  -4 2410.98 65.6178   5
   4   0  -4 2466.22 53.1799   6
   4   0  -4 2410.97 52.9666   6
  -4   0   4 2491.44 66.1492   5
   3   0  -4 2360.79 59.9405   5
   3   0  -4 2280.07 51.8851   6
  -3   0   4 2302.60 59.8666   5
  -3   0   4 2304.00 51.8528   6
   2   0  -4 1105.49 28.2198   6
  -2   0   4 1102.08 31.2984   5
  -2   0   4 1110.32 31.7408   5
  -2   0   4 1096.76 28.0308   6
   1   0  -4 2394.03 54.7647   6
   1   0  -4 2294.46 55.2252   5
  -1   0   4 2304.93 54.9637   5
  -1   0   4 2281.00 54.2496   6
   0   0  -4 1581.33 39.9848   5
   0   0  -4 1614.30 40.8292   6
   0   0   4 1599.88 39.9882   5
   0   0   4 1634.38 40.8287   6
  -1   0  -4 91.1961 4.78291   4
  -1   0  -4 101.035 5.86326   2
   1   0   4 92.4533 5.68544   2
   1   0   4 88.0986 3.91379   1
   1   0   4 85.7090 5.35881   3
   1   0   4 92.1975 4.83607   4
  -2   0  -4 118.598 6.92458   3
  -2   0  -4 123.691 5.99203   4
   2   0   4 123.198 6.18484   4
   2   0   4 126.349 6.94625   3
   2   0   4 137.281 7.92926   2
  -3   0  -4 37.6602 4.42694   4
  -3   0  -4 28.3232 3.99271   3
  -3   0  -4 27.2619 4.51856   2
   3   0   4 26.1262 4.20817   3
   3   0   4 25.9836 3.83522   4
   3   0   4 35.5005 5.59569   2
   3   0   4 25.7941 2.17132   1
  -4   0  -4 663.524 23.8093   2
  -4   0  -4 682.859 20.7218   4
  -4   0  -4 669.266 21.7048   3
  -4   0  -4 698.067 21.9830   4
   4   0   4 662.961 21.3193   3
   4   0   4 671.440 25.5047   2
  -5   0  -4 204.919 11.1543   4
  -5   0  -4 209.849 10.4008   4
  -5   0  -4 205.852 12.8224   2
  -5   0  -4 245.745 17.4964   3
   5   0   4 202.750 10.3994   3
   5   0   4 194.542 8.03383   1
   5   0   4 203.509 13.8613   2
  -6   0  -4 77.6791 7.34399   4
  -6   0  -4 84.0004 6.85847   4
  -6   0  -4 82.8328 8.63560   2
  -6   0  -4 77.4902 6.73988   3
   6   0   4 80.8526 6.66970   3
   6   0   4 83.7036 5.94651   1
   6   0   4 76.3891 9.80758   2
  -7   0  -4 1.81167 2.08708   4
  -7   0  -4 4.98506 2.63687   3
   7   0   4 4.46267 1.72293   1
   7   0   4 -0.0330 2.26272   2
   7   0   4 2.12060 1.64207   3
  -8   0  -4 121.593 9.03409   3
  -8   0  -4 101.697 9.72984   4
   8   0   4 105.974 8.30221   3
   8   0   4 106.964 7.10789   1
   8   0   4 111.884 15.9920   2
  -9   0  -4 280.254 14.3614   3
  -9   0  -4 252.877 16.4452   4
   9   0   4 277.925 22.4237   2
   9   0   4 231.362 11.7867   1
 -10   0  -4 162.468 13.7490   4
 -10   0  -4 144.561 10.4054   3
  10   0   4 138.848 19.9651   2
 -11   0  -4 105.346 14.0778   4
 -11   0  -4 138.085 10.1408   3
  11   0   4 152.664 10.1499   1
  11   0   4 126.650 21.5879   2
  12  -1  -4 2.23006 2.15724   1
  12  -1  -4 4.50838 4.83468   2
 -12   1   4 -1.4965 1.52296   4
  11  -1  -4 -0.0153 1.49300   1
  11  -1  -4 -2.1950 1.32145   2
 -11   1   4 4.04971 2.66421   4
  10  -1  -4 87.1860 6.95848   1
  10  -1  -4 68.1084 12.2180   2
 -10   1   4 75.6175 11.0100   4
   9  -1  -4 8.71585 4.78587   2
   9  -1  -4 2.85443 1.77029   1
  -9   1   4 4.20316 2.77908   4
   8  -1  -4 141.447 8.03194   1
   8  -1  -4 141.807 13.6436   2
  -8   1   4 134.726 10.4980   4
   7  -1  -4 271.401 11.0071   1
   7  -1  -4 261.777 17.5968   2
  -7   1   4 235.953 16.4939   2
  -7   1   4 278.630 14.3026   4
   6  -1  -4 451.600 14.6112   1
   6  -1  -4 463.586 22.1092   2
   6  -1  -4 430.662 18.0107   4
  -6   1   4 439.687 24.3666   2
  -6   1   4 433.297 17.7113   4
   5  -1  -4 209.052 13.6775   2
   5  -1  -4 176.045 10.0863   4
   5  -1  -4 207.962 8.31119   1
  -5   1   4 203.676 11.4444   4
  -5   1   4 207.334 8.50271   1
  -5   1   4 208.716 13.3283   2
   4  -1  -4 1531.60 35.0331   6
   4  -1  -4 1555.87 47.4260   5
  -4   1   4 1583.76 47.7182   5
  -4   1   4 1567.13 35.1779   6
   3  -1  -4 2665.04 60.3728   6
  -3   1   4 2744.94 69.7858   5
  -3   1   4 2712.98 60.5287   6
  -3   1   4 2701.60 68.7017   5
   2  -1  -4 2831.51 64.3532   6
  -2   1   4 2841.19 64.1967   6
  -2   1   4 2787.10 68.9038   5
   1  -1  -4 2487.29 58.3352   6
   1  -1  -4 2419.54 60.6517   5
  -1   1   4 2506.44 60.4729   5
  -1   1   4 2468.97 58.1197   6
   0  -1  -4 1883.89 48.5849   5
   0   1   4 1940.61 48.7326   5
   0   1   4 1874.44 47.5717   6
  -1  -1  -4 3850.07 91.1965   6
  -1  -1  -4 3990.16 96.9206   5
   1   1   4 4114.44 93.1375   5
   1   1   4 3883.73 91.0465   6
  -2  -1  -4 3746.24 88.7383   6
  -2  -1  -4 3767.56 90.3526   5
   2   1   4 3730.58 88.3200   6
   2   1   4 3814.28 91.2274   5
  -3  -1  -4 769.761 25.8339   2
  -3  -1  -4 770.366 23.9237   3
  -3  -1  -4 821.872 22.1461   4
   3   1   4 761.410 23.5875   3
   3   1   4 814.516 27.4874   2
  -4  -1  -4 267.540 12.1646   3
  -4  -1  -4 264.696 10.9703   4
  -4  -1  -4 258.391 11.6707   4
  -4  -1  -4 269.547 14.2166   2
   4   1   4 248.858 11.7884   3
   4   1   4 261.228 9.30782   1
  -5  -1  -4 388.881 15.0867   4
  -5  -1  -4 405.261 16.5194   4
  -5  -1  -4 409.270 20.6636   2
  -5  -1  -4 395.677 16.1321   3
   5   1   4 401.969 20.9607   2
   5   1   4 364.339 15.4377   3
   5   1   4 397.467 13.0407   1
  -6  -1  -4 1241.00 55.5788   2
  -6  -1  -4 997.543 31.2034   3
  -6  -1  -4 953.299 30.4162   4
  -6  -1  -4 985.883 32.3679   4
   6   1   4 1072.94 31.0809   1
   6   1   4 1020.87 39.5826   2
  -7  -1  -4 493.394 19.5877   3
  -7  -1  -4 472.576 20.9317   4
   7   1   4 475.070 16.6172   1
   7   1   4 485.594 27.2598   2
   7   1   4 463.045 18.9663   3
  -8  -1  -4 528.850 20.8597   3
  -8  -1  -4 505.651 22.9431   4
   8   1   4 500.107 29.9552   2
   8   1   4 496.869 18.2540   1
  -9  -1  -4 329.434 16.2708   3
  -9  -1  -4 340.844 19.1490   4
   9   1   4 338.772 14.8396   1
   9   1   4 297.252 24.0709   2
 -10  -1  -4 220.996 16.1284   4
 -10  -1  -4 200.504 12.4768   3
  10   1   4 201.010 11.9149   1
 -11  -1  -4 80.6766 7.89207   3
 -11  -1  -4 88.0413 12.4296   4
  11   1   4 70.1537 20.0317   2
  11   1   4 60.7480 7.76694   1
  12  -2  -4 654.464 46.2406   2
  12  -2  -4 769.398 25.1310   1
 -12   2   4 700.571 37.8377   4
  11  -2  -4 462.960 18.0306   1
  11  -2  -4 491.704 31.2837   2
 -11   2   4 506.055 25.1215   4
  10  -2  -4 464.792 29.1489   2
  10  -2  -4 523.683 18.4468   1
 -10   2   4 537.564 24.7846   4
   9  -2  -4 192.902 16.9254   2
   9  -2  -4 171.113 9.10871   1
  -9   2   4 205.132 13.5590   4
   8  -2  -4 1312.13 48.0326   2
   8  -2  -4 1300.94 34.0084   1
  -8   2   4 1292.62 40.3439   4
   7  -2  -4 1382.01 46.9858   2
   7  -2  -4 1307.77 40.2135   4
  -7   2   4 1350.02 51.3798   2
  -7   2   4 1351.40 39.7379   4
   6  -2  -4 1457.98 46.8022   2
  -6   2   4 1450.82 47.7174   2
   5  -2  -4 2089.90 53.8276   4
  -5   2   4 2227.30 61.0187   2
   4  -2  -4 3.39255 1.45741   4
   4  -2  -4 2.01783 1.00446   1
   4  -2  -4 1.74718 0.80184   3
  -4   2   4 3.40662 1.05926   3
  -4   2   4 3.07903 1.48445   4
  -4   2   4 6.41762 2.79533   2
  -4   2   4 4.84807 1.39653   1
  -4   2   4 9.05323 3.63078   2
   3  -2  -4 166.989 7.83211   4
   3  -2  -4 174.448 6.52668   1
   3  -2  -4 170.579 6.78295   3
  -3   2   4 162.680 10.0776   2
  -3   2   4 163.865 6.62637   1
  -3   2   4 191.809 11.0722   2
  -3   2   4 175.452 6.86988   3
  -3   2   4 181.647 7.94108   4
   2  -2  -4 2303.17 60.8552   5
   2  -2  -4 2324.92 55.1034   6
  -2   2   4 2303.50 55.0675   6
  -2   2   4 2363.08 60.5498   5
   1  -2  -4 390.735 15.5617   2
   1  -2  -4 400.940 13.4115   3
   1  -2  -4 411.669 11.8565   4
  -1   2   4 402.525 11.7758   4
  -1   2   4 402.384 11.3716   1
  -1   2   4 389.225 13.1982   3
  -1   2   4 420.080 15.7828   2
   0  -2  -4 25.5176 2.24005   4
   0  -2  -4 23.8428 3.71035   3
   0  -2  -4 25.9000 4.30801   2
   0   2   4 20.5623 3.72285   2
   0   2   4 25.7358 3.92058   3
   0   2   4 22.9344 2.02195   1
   0   2   4 26.7839 2.16898   4
  -1  -2  -4 516.806 18.9254   2
  -1  -2  -4 526.831 17.3573   3
   1   2   4 517.271 17.1291   3
   1   2   4 509.320 18.9825   2
  -2  -2  -4 40.4996 5.67309   3
  -2  -2  -4 27.2833 4.76228   2
   2   2   4 33.0814 3.08698   4
   2   2   4 27.3984 4.69019   2
   2   2   4 28.2374 4.00116   3
   2   2   4 33.3489 2.62514   1
  -3  -2  -4 360.128 16.5967   2
  -3  -2  -4 363.613 13.1625   4
  -3  -2  -4 348.547 14.4180   3
  -3  -2  -4 364.566 12.4240   4
   3   2   4 369.891 11.4936   1
   3   2   4 353.746 17.4731   2
   3   2   4 345.770 14.3528   3
  -4  -2  -4 707.377 23.3917   3
  -4  -2  -4 701.754 26.3932   2
  -4  -2  -4 703.629 22.2886   4
  -4  -2  -4 697.681 21.0518   4
   4   2   4 669.573 22.9329   3
   4   2   4 711.391 19.6758   1
   4   2   4 703.616 28.0972   2
  -5  -2  -4 151.216 11.6075   2
  -5  -2  -4 155.376 9.81407   3
  -5  -2  -4 162.735 8.94512   4
  -5  -2  -4 163.287 9.81014   4
   5   2   4 152.201 12.9977   2
   5   2   4 158.073 7.73077   1
   5   2   4 155.265 10.9265   3
  -6  -2  -4 59.7769 7.18456   4
  -6  -2  -4 72.3721 8.92954   3
  -6  -2  -4 60.9531 8.48902   4
   6   2   4 52.7728 9.17757   2
   6   2   4 41.1093 5.91757   3
  -7  -2  -4 1046.67 33.7336   3
  -7  -2  -4 1105.05 35.7291   4
   7   2   4 1095.92 30.8514   1
   7   2   4 1106.27 45.3033   2
   7   2   4 1059.53 37.1020   3
  -8  -2  -4 317.910 16.0093   3
  -8  -2  -4 331.156 17.8409   4
   8   2   4 334.278 14.5094   1
   8   2   4 313.548 23.6649   2
  -9  -2  -4 253.564 14.3490   3
  -9  -2  -4 272.357 17.0153   4
   9   2   4 246.225 22.3719   2
   9   2   4 268.852 13.4292   1
 -10  -2  -4 367.012 17.8016   3
 -10  -2  -4 335.673 20.2205   4
  10   2   4 328.714 27.7794   2
  10   2   4 341.082 16.4364   1
 -11  -2  -4 209.023 16.5431   4
 -11  -2  -4 228.638 13.8558   3
  11   2   4 223.401 30.2080   2
  11   2   4 223.776 13.5519   1
  12  -3  -4 174.408 9.88879   1
  12  -3  -4 147.766 30.3716   2
 -12   3   4 167.456 15.5767   4
  11  -3  -4 291.855 23.7125   2
  11  -3  -4 283.814 12.6317   1
 -11   3   4 260.801 17.5896   4
  10  -3  -4 737.237 37.3590   2
  10  -3  -4 725.046 22.6619   1
 -10   3   4 747.868 30.3334   4
   9  -3  -4 700.995 40.8823   2
   9  -3  -4 623.884 19.7585   1
  -9   3   4 640.940 26.3672   4
   8  -3  -4 1204.19 45.2641   2
   8  -3  -4 1149.68 30.5198   1
  -8   3   4 1173.53 37.4346   4
   7  -3  -4 741.543 31.7419   2
   7  -3  -4 745.024 20.5094   1
   7  -3  -4 664.359 25.1914   4
  -7   3   4 725.923 25.6312   4
   6  -3  -4 366.860 15.9201   4
   6  -3  -4 388.345 20.3869   2
   6  -3  -4 345.620 11.7504   1
  -6   3   4 378.021 15.8039   4
  -6   3   4 388.353 21.1188   2
   5  -3  -4 844.306 25.9160   4
  -5   3   4 896.433 33.0821   2
  -5   3   4 803.408 30.4748   2
  -5   3   4 853.159 25.5613   4
   4  -3  -4 2203.73 51.2985   6
  -4   3   4 2167.08 62.4553   5
  -4   3   4 2192.79 64.0404   5
  -4   3   4 2161.91 51.4040   6
   3  -3  -4 3624.53 82.5531   6
  -3   3   4 3708.05 92.8807   5
  -3   3   4 3586.91 82.7776   6
  -3   3   4 3628.16 91.1771   5
   2  -3  -4 1765.94 44.5297   6
   2  -3  -4 1723.44 50.5673   5
  -2   3   4 1703.33 44.3069   6
  -2   3   4 1717.78 49.2917   5
   1  -3  -4 2357.97 58.1240   6
   1  -3  -4 2282.88 62.5379   5
  -1   3   4 2339.50 58.2863   6
  -1   3   4 2380.83 62.3208   5
   0  -3  -4 2544.86 63.8480   6
   0  -3  -4 2625.58 67.9246   5
   0   3   4 2568.72 64.1289   6
   0   3   4 2551.62 67.5104   5
  -1  -3  -4 1891.53 50.7879   2
  -2  -3  -4 1454.23 41.8890   2
   2   3   4 1404.49 42.3436   2
  -3  -3  -4 2396.95 64.1149   2
  -4  -3  -4 633.518 19.6808   4
  -4  -3  -4 624.424 22.3712   3
  -4  -3  -4 621.940 25.7034   2
  -4  -3  -4 672.842 21.2978   4
   4   3   4 636.580 18.8342   1
   4   3   4 679.670 28.4055   2
  -5  -3  -4 269.626 12.8487   4
  -5  -3  -4 250.881 11.4599   4
  -5  -3  -4 252.887 13.2738   3
   5   3   4 205.435 16.0638   2
   5   3   4 246.859 10.5010   1
   5   3   4 236.647 12.8051   3
  -6  -3  -4 308.567 15.2515   4
  -6  -3  -4 348.113 16.1959   3
  -6  -3  -4 322.503 14.4334   4
   6   3   4 321.807 17.9664   3
   6   3   4 323.815 21.7257   2
  -7  -3  -4 22.3605 5.50646   4
  -7  -3  -4 24.3745 5.37334   3
   7   3   4 29.7876 9.67442   2
   7   3   4 28.2839 4.97981   1
  -8  -3  -4 70.6010 9.82264   4
  -8  -3  -4 60.5467 8.53391   3
   8   3   4 46.0645 10.3484   2
   8   3   4 51.7281 6.13635   1
  -9  -3  -4 15.8277 5.13976   4
  -9  -3  -4 12.7215 4.08819   3
   9   3   4 5.25265 3.58716   2
   9   3   4 12.1416 3.79266   1
 -10  -3  -4 21.9727 5.87269   4
 -10  -3  -4 22.9089 5.05130   3
  10   3   4 21.1416 4.63680   1
  10   3   4 17.5597 8.21229   2
  12  -4  -4 142.750 8.36693   1
 -12   4   4 117.891 14.2901   4
  11  -4  -4 121.665 18.2383   2
  11  -4  -4 150.175 8.30183   1
 -11   4   4 171.130 13.7977   4
  10  -4  -4 255.785 20.8646   2
  10  -4  -4 246.279 10.6158   1
 -10   4   4 269.776 16.6999   4
   9  -4  -4 15.5158 5.78740   2
   9  -4  -4 20.7141 3.50943   1
  -9   4   4 20.4365 5.16431   4
   8  -4  -4 5.15199 3.50591   2
   8  -4  -4 10.9434 2.44328   1
  -8   4   4 6.55610 2.90010   4
   7  -4  -4 68.1732 8.93770   4
   7  -4  -4 56.1505 4.08803   1
   7  -4  -4 73.8527 11.2695   2
  -7   4   4 67.5793 8.20715   4
  -7   4   4 90.7011 13.6638   2
   6  -4  -4 26.2905 4.50997   4
   6  -4  -4 30.5121 3.38984   1
   6  -4  -4 24.6438 2.95973   3
  -6   4   4 18.5186 5.40333   2
  -6   4   4 17.0179 4.92819   2
  -6   4   4 22.8073 4.35213   4
  -6   4   4 20.9973 2.13949   3
   5  -4  -4 283.916 10.0229   3
   5  -4  -4 282.697 9.30764   1
   5  -4  -4 282.302 12.4460   4
  -5   4   4 281.161 16.4514   2
  -5   4   4 274.862 19.1109   2
  -5   4   4 291.880 12.2720   4
  -5   4   4 287.782 10.0793   3
   4  -4  -4 13.0893 2.58052   3
   4  -4  -4 9.52496 2.38357   4
   4  -4  -4 13.0587 1.95813   1
  -4   4   4 15.6204 4.82854   2
  -4   4   4 15.7730 2.77783   1
  -4   4   4 6.95892 3.07804   2
  -4   4   4 12.2331 2.52651   4
  -4   4   4 10.5438 2.29914   3
   3  -4  -4 192.886 12.5275   2
   3  -4  -4 191.392 8.70582   3
   3  -4  -4 190.475 8.02932   4
  -3   4   4 207.766 14.2672   2
  -3   4   4 202.269 7.34077   1
  -3   4   4 199.447 12.7231   2
  -3   4   4 187.982 8.65570   3
  -3   4   4 188.544 7.70330   4
   2  -4  -4 312.831 15.7885   2
   2  -4  -4 298.315 11.9579   3
   2  -4  -4 297.179 9.52886   4
  -2   4   4 297.529 11.9068   3
  -2   4   4 302.290 9.63782   1
  -2   4   4 306.477 9.43818   4
  -2   4   4 300.804 14.9575   2
  -1   4   4 1491.07 43.2164   2
   0  -4  -4 1074.21 34.4642   2
   0   4   4 1140.53 31.4058   3
  -1  -4  -4 2737.12 72.3122   6
  -1  -4  -4 2809.14 75.4090   5
   1   4   4 2768.00 70.8322   6
   1   4   4 2755.40 82.2055   5
  -2  -4  -4 769.517 20.5097   4
  -2  -4  -4 775.282 19.6671   4
  -2  -4  -4 738.018 27.6358   2
  -2  -4  -4 757.539 25.0870   3
   2   4   4 770.848 29.0728   2
   2   4   4 742.911 24.8322   3
  -3  -4  -4 1620.98 49.5128   2
  -3  -4  -4 1712.88 41.7001   4
   3   4   4 1733.65 52.3449   2
   3   4   4 1681.29 46.0628   3
  -4  -4  -4 1454.83 37.9872   4
  -4  -4  -4 1410.57 36.2487   4
  -4  -4  -4 1426.17 41.2693   3
   4   4   4 1407.22 40.9860   3
   4   4   4 1412.28 48.0852   2
  -5  -4  -4 1033.08 29.6968   4
  -5  -4  -4 1078.40 31.5391   4
  -5  -4  -4 1048.59 33.2564   3
   5   4   4 1030.90 41.4773   2
   5   4   4 1054.21 29.3236   1
  -6  -4  -4 1411.85 43.9396   3
  -6  -4  -4 1506.22 41.5477   4
  -6  -4  -4 1584.43 43.6145   4
   6   4   4 1566.00 41.4730   1
   6   4   4 1540.64 56.0876   2
  -7  -4  -4 704.563 26.7554   3
  -7  -4  -4 702.785 26.4628   4
   7   4   4 703.157 23.7482   1
  -8  -4  -4 598.932 25.0775   4
  -8  -4  -4 560.082 24.0587   3
   8   4   4 611.797 22.4488   1
   8   4   4 632.770 36.6276   2
  -9  -4  -4 547.811 23.5704   3
  -9  -4  -4 507.684 24.1328   4
   9   4   4 524.747 21.5544   1
 -10  -4  -4 392.415 19.9005   3
 -10  -4  -4 414.691 22.2694   4
  10   4   4 445.353 20.1103   1
  10   4   4 412.182 32.8207   2
  12  -5  -4 447.157 15.8746   1
  12  -5  -4 457.833 31.4486   2
 -12   5   4 507.950 26.0724   4
  11  -5  -4 503.700 31.7198   2
  11  -5  -4 549.021 17.3184   1
 -11   5   4 522.700 25.6880   4
  10  -5  -4 440.000 14.5956   1
  10  -5  -4 428.027 27.4881   2
 -10   5   4 437.709 21.9132   4
   9  -5  -4 455.935 14.6860   1
  -9   5   4 464.209 27.6972   2
  -9   5   4 495.824 22.1066   4
   8  -5  -4 1342.58 32.8855   1
  -8   5   4 1356.68 41.1280   4
  -8   5   4 1339.74 49.5979   2
   7  -5  -4 871.491 22.1251   1
   7  -5  -4 814.931 27.9152   4
   7  -5  -4 863.235 21.8025   3
  -7   5   4 838.236 28.0538   4
  -7   5   4 845.374 21.8527   3
  -7   5   4 839.823 35.3565   2
   6  -5  -4 769.114 25.3003   4
   6  -5  -4 789.148 20.4268   1
   6  -5  -4 786.782 21.7057   3
  -6   5   4 822.151 33.0239   2
  -6   5   4 819.986 22.0163   3
  -6   5   4 782.484 25.2565   4
   5  -5  -4 874.565 26.0806   4
   5  -5  -4 913.196 24.7256   3
  -5   5   4 859.637 25.7460   4
  -5   5   4 904.486 35.3059   2
  -5   5   4 910.021 24.8629   3
  -5   5   4 889.497 33.4224   2
  -4   5   4 1694.02 43.0927   3
  -4   5   4 1825.83 52.2596   2
  -4   5   4 1688.08 57.5354   2
   3  -5  -4 1135.85 38.0107   2
  -3   5   4 1113.95 36.7984   2
  -3   5   4 1119.29 30.9786   3
   2  -5  -4 810.374 24.7721   3
   2  -5  -4 813.498 19.8741   4
  -2   5   4 808.399 20.8532   1
  -2   5   4 844.334 29.8631   2
  -2   5   4 818.353 25.0304   3
   1  -5  -4 849.573 30.9164   2
  -1   5   4 881.935 30.9324   2
  -1   5   4 871.789 22.1391   1
  -1   5   4 901.222 27.0107   3
   0  -5  -4 454.358 20.6232   2
   0  -5  -4 470.537 17.8995   3
   0   5   4 464.646 20.8372   2
   0   5   4 474.143 13.6520   1
   0   5   4 453.900 17.6752   3
  -1  -5  -4 438.291 17.4868   3
  -1  -5  -4 457.378 11.3092   4
  -1  -5  -4 421.515 22.4030   2
  -1  -5  -4 429.040 11.4680   4
   1   5   4 416.004 20.2540   2
   1   5   4 394.017 18.6816   3
   1   5   4 426.741 13.3321   1
  -2  -5  -4 5.73640 1.31985   4
  -2  -5  -4 3.95403 1.97350   3
  -2  -5  -4 5.20627 1.45135   4
  -2  -5  -4 4.75884 2.71665   2
   2   5   4 5.84519 2.65387   3
   2   5   4 5.54851 3.44497   2
   2   5   4 2.29711 1.04915   1
  -3  -5  -4 160.788 7.63438   4
  -3  -5  -4 163.719 10.5149   3
  -3  -5  -4 150.910 6.83785   4
  -3  -5  -4 136.513 11.7142   2
   3   5   4 140.514 9.98846   3
   3   5   4 172.341 8.08228   1
  -4  -5  -4 45.6809 5.54123   4
  -4  -5  -4 59.9489 8.45348   3
  -4  -5  -4 46.7948 4.15715   4
   4   5   4 47.4639 5.41254   1
   4   5   4 40.8999 8.68063   2
  -5  -5  -4 13.0118 3.06917   4
  -5  -5  -4 14.9956 4.24795   3
  -5  -5  -4 16.3363 3.73950   4
   5   5   4 12.9648 4.71224   2
   5   5   4 11.8050 2.88596   1
  -6  -5  -4 10.5717 3.50620   4
  -6  -5  -4 9.45325 3.58960   3
  -6  -5  -4 13.6888 3.47515   4
   6   5   4 17.5525 7.47962   2
   6   5   4 13.7440 3.09347   1
  -7  -5  -4 66.2935 8.64369   4
  -7  -5  -4 69.3658 10.0997   3
   7   5   4 80.0088 8.93921   1
   7   5   4 89.8817 16.6290   2
  -8  -5  -4 128.251 10.6202   4
  -8  -5  -4 143.671 11.5552   3
   8   5   4 168.068 24.0448   2
   8   5   4 135.249 9.90580   1
  -9  -5  -4 61.2510 9.44326   3
  -9  -5  -4 53.9561 8.63334   4
   9   5   4 61.5500 8.18169   1
   9   5   4 36.6737 9.78736   2
 -10  -5  -4 140.679 12.4644   4
 -10  -5  -4 139.288 11.6615   3
  10   5   4 136.389 11.0013   1
  10   5   4 102.440 20.0778   2
  12  -6  -4 45.5993 4.88616   1
 -12   6   4 41.7565 8.95564   4
 -12   6   4 34.4000 10.6592   2
  11  -6  -4 23.1903 3.32066   1
 -11   6   4 16.0148 5.14790   4
 -11   6   4 22.5032 8.46288   2
 -10   6   4 -0.5514 2.03377   2
 -10   6   4 0.86426 2.04156   4
   9  -6  -4 17.4178 2.68880   1
  -9   6   4 22.7827 5.41651   4
  -9   6   4 15.9493 5.44411   2
   8  -6  -4 308.806 10.1939   1
  -8   6   4 317.007 24.5158   2
  -8   6   4 281.954 10.3402   3
  -8   6   4 308.736 10.8822   3
  -8   6   4 291.793 15.3932   4
   7  -6  -4 124.122 6.72816   3
   7  -6  -4 115.300 5.45806   1
   7  -6  -4 112.720 8.35452   4
  -7   6   4 123.908 8.90189   4
  -7   6   4 123.257 6.69230   3
  -7   6   4 119.879 12.4286   2
   6  -6  -4 728.726 23.9468   4
   6  -6  -4 755.524 22.4156   3
  -6   6   4 803.591 24.6515   4
  -6   6   4 727.352 22.2229   3
  -6   6   4 740.808 31.9974   2
   5  -6  -4 659.928 20.9462   3
   5  -6  -4 644.808 20.4483   4
  -5   6   4 666.303 21.0935   3
  -5   6   4 648.672 20.2888   4
  -5   6   4 658.820 28.4507   2
   4  -6  -4 527.154 16.2127   4
   4  -6  -4 550.369 18.6133   3
  -4   6   4 524.412 18.5371   3
  -4   6   4 505.561 15.8436   4
  -4   6   4 528.354 24.1390   2
  -4   6   4 538.223 25.5701   2
   3  -6  -4 467.727 23.0408   2
   3  -6  -4 492.921 13.7288   4
   3  -6  -4 484.232 17.8957   3
  -3   6   4 516.408 13.7497   4
  -3   6   4 488.377 22.3600   2
  -3   6   4 472.310 17.9457   3
   2  -6  -4 1898.02 56.0411   2
   1  -6  -4 885.876 27.3099   3
   1  -6  -4 803.739 31.2471   2
  -1   6   4 849.718 21.6779   1
  -1   6   4 828.539 29.5597   3
  -1   6   4 813.251 30.9209   2
   0  -6  -4 1277.15 36.4865   3
   0  -6  -4 1175.49 40.5999   2
   0   6   4 1200.50 36.2384   3
   0   6   4 1277.37 41.4512   2
  -1  -6  -4 625.022 27.1881   2
  -1  -6  -4 698.313 24.4828   3
   1   6   4 640.490 23.9640   3
   1   6   4 717.634 28.9940   2
   1   6   4 679.214 19.2811   1
  -2  -6  -4 1223.70 37.2476   3
  -2  -6  -4 1212.14 28.7200   4
   2   6   4 1202.51 42.9026   2
   2   6   4 1242.28 31.7823   1
  -3  -6  -4 1497.34 35.4850   4
  -3  -6  -4 1475.15 43.7275   3
  -3  -6  -4 1471.05 36.2453   4
   3   6   4 1506.76 38.3275   1
  -4  -6  -4 1560.47 39.7157   4
  -4  -6  -4 1597.49 46.3986   3
  -4  -6  -4 1530.78 38.5532   4
   4   6   4 1560.80 40.7585   1
  -5  -6  -4 1771.81 45.5940   4
  -5  -6  -4 1734.79 50.8987   3
  -5  -6  -4 1701.41 44.0587   4
   5   6   4 1711.61 45.7924   1
   5   6   4 1871.74 74.1462   2
  -6  -6  -4 824.886 26.7662   4
  -6  -6  -4 873.370 28.2972   4
   6   6   4 915.069 28.4631   1
   6   6   4 885.398 42.1682   2
  -7  -6  -4 431.699 19.1281   4
  -7  -6  -4 452.105 21.5902   3
   7   6   4 450.077 18.9789   1
   7   6   4 419.068 29.5954   2
  -8  -6  -4 293.883 16.4370   4
  -8  -6  -4 287.080 17.2495   3
   8   6   4 282.515 15.2499   1
   8   6   4 278.129 25.1496   2
  -9  -6  -4 329.135 18.0291   4
  -9  -6  -4 269.629 17.1108   3
   9   6   4 286.828 26.7912   2
   9   6   4 288.569 16.8999   1
  12  -7  -4 774.125 20.7535   1
 -12   7   4 811.847 43.8247   2
 -12   7   4 755.854 34.0565   4
  11  -7  -4 437.443 13.4889   1
 -11   7   4 438.613 30.1054   2
 -11   7   4 480.347 23.8128   4
  10  -7  -4 610.983 16.9809   1
 -10   7   4 633.003 34.9444   2
 -10   7   4 613.295 26.6386   4
   9  -7  -4 735.912 19.1782   1
  -9   7   4 718.946 20.3274   3
  -9   7   4 724.862 28.0050   4
  -9   7   4 737.492 36.7242   2
   8  -7  -4 316.707 12.2803   3
  -8   7   4 316.318 12.2859   3
  -8   7   4 332.086 16.3012   4
  -8   7   4 335.552 22.6238   2
   7  -7  -4 261.620 13.1188   4
   7  -7  -4 275.130 11.8523   3
  -7   7   4 245.276 11.3179   3
  -7   7   4 293.168 13.8665   4
  -7   7   4 279.179 19.5748   2
   6  -7  -4 510.564 18.3265   4
  -6   7   4 549.317 26.9803   2
  -6   7   4 516.596 18.3959   4
  -6   7   4 501.579 18.3290   3
   5  -7  -4 789.337 25.1074   3
  -5   7   4 812.314 23.1587   4
  -5   7   4 761.556 25.1244   3
  -5   7   4 815.842 33.0516   2
   4  -7  -4 88.2438 6.99420   3
  -4   7   4 99.4088 5.77155   4
  -4   7   4 98.8277 5.22174   4
  -4   7   4 113.328 10.9193   2
  -4   7   4 91.4191 7.23655   3
   3  -7  -4 530.666 19.8810   3
  -3   7   4 560.623 13.7347   4
  -3   7   4 519.455 13.5363   4
  -3   7   4 526.206 20.3911   3
  -3   7   4 573.955 25.7102   2
   2  -7  -4 118.201 8.61901   3
  -2   7   4 127.028 9.03280   3
  -2   7   4 123.339 5.71381   1
  -2   7   4 122.472 11.0532   2
   1  -7  -4 11.1728 4.30970   2
   1  -7  -4 10.4534 3.27175   3
  -1   7   4 10.3369 3.27329   3
  -1   7   4 8.67846 3.87409   2
  -1   7   4 11.0719 2.38059   1
   0  -7  -4 22.0930 5.23468   3
   0   7   4 22.2061 3.36912   1
   0   7   4 17.3063 5.43879   2
  -1  -7  -4 360.339 16.9447   3
   1   7   4 334.302 19.8156   2
   1   7   4 318.139 12.1797   1
  -2  -7  -4 18.3090 4.40883   3
   2   7   4 10.9852 4.79157   2
   2   7   4 11.8576 2.48964   1
  -3  -7  -4 3.20296 2.41787   3
  -3  -7  -4 5.25432 1.55877   4
  -3  -7  -4 6.22135 1.48761   4
   3   7   4 3.84229 2.80797   2
   3   7   4 2.95334 1.64415   1
  -4  -7  -4 116.073 6.67506   4
  -4  -7  -4 128.765 6.50456   4
  -4  -7  -4 119.930 10.2031   3
   4   7   4 74.4161 18.9415   2
   4   7   4 107.786 7.63249   1
  -5  -7  -4 32.6731 4.46756   4
  -5  -7  -4 32.9804 6.57698   3
  -5  -7  -4 34.4838 4.99076   4
   5   7   4 40.7551 10.8505   2
   5   7   4 24.8406 4.53368   1
  -6  -7  -4 114.082 7.60307   4
  -6  -7  -4 105.183 10.2075   3
  -6  -7  -4 87.4353 7.17245   4
   6   7   4 81.8928 13.7221   2
   6   7   4 99.6778 8.17838   1
  -7  -7  -4 240.219 13.3019   4
  -7  -7  -4 240.784 15.9314   3
   7   7   4 224.727 22.1012   2
   7   7   4 253.065 14.0624   1
  -8  -7  -4 233.632 15.9992   3
   8   7   4 248.203 24.5773   2
   8   7   4 246.569 14.5688   1
 -11   8   4 168.047 22.1212   2
 -11   8   4 165.045 13.4538   4
 -10   8   4 429.033 21.0783   4
 -10   8   4 370.997 26.7857   2
  -9   8   4 236.472 10.9478   3
  -9   8   4 248.823 14.6172   4
  -9   8   4 244.673 20.1696   2
  -9   8   4 232.479 10.4460   3
   8  -8  -4 247.178 13.7128   3
  -8   8   4 230.217 11.2639   3
  -8   8   4 237.977 19.1327   2
  -8   8   4 249.318 13.6445   4
   7  -8  -4 257.863 12.4087   3
  -7   8   4 251.891 18.9245   2
  -7   8   4 276.783 12.9678   3
  -7   8   4 274.676 13.2101   4
  -7   8   4 253.198 12.5848   4
   6  -8  -4 531.934 19.9633   3
  -6   8   4 537.259 20.7286   4
  -6   8   4 526.485 18.1316   4
  -6   8   4 555.021 27.8149   2
  -6   8   4 529.014 20.0735   3
   5  -8  -4 1548.45 42.4148   3
  -5   8   4 1529.10 51.3268   2
  -5   8   4 1558.41 37.6865   4
  -5   8   4 1518.93 37.6514   4
  -5   8   4 1476.41 34.9106   1
  -5   8   4 1465.62 42.4151   3
   4  -8  -4 1699.27 45.8132   3
  -4   8   4 1675.21 37.5027   4
  -4   8   4 1645.89 37.7186   4
  -4   8   4 1578.15 45.5533   3
  -4   8   4 1659.61 38.0087   1
  -4   8   4 1546.62 52.4165   2
   3  -8  -4 814.441 28.0387   3
  -3   8   4 855.487 21.8860   1
  -3   8   4 852.616 34.2192   2
  -3   8   4 812.521 31.2153   3
   2  -8  -4 1994.81 53.6859   3
  -2   8   4 1947.82 60.0612   2
   1  -8  -4 1499.50 43.9742   3
  -1   8   4 1514.99 50.2162   2
  -1   8   4 1490.66 36.7582   1
   0  -8  -4 871.225 30.2062   3
   0   8   4 863.196 24.0468   1
   0   8   4 816.198 34.4886   2
  -1  -8  -4 1328.92 41.4978   3
   1   8   4 1304.83 34.6444   1
   1   8   4 1366.57 48.0495   2
  -2  -8  -4 785.360 29.4180   3
   2   8   4 800.564 23.9703   1
   2   8   4 723.879 34.0288   2
  -3  -8  -4 958.260 22.8581   4
  -3  -8  -4 1041.00 43.5914   3
  -3  -8  -4 941.098 22.5583   4
   3   8   4 964.743 28.7836   1
   3   8   4 937.317 45.0758   2
  -4  -8  -4 686.112 19.4732   4
  -4  -8  -4 693.110 28.3533   3
  -4  -8  -4 667.074 18.9337   4
   4   8   4 737.631 36.7232   2
   4   8   4 699.572 23.6746   1
  -5  -8  -4 621.449 19.5733   4
  -5  -8  -4 656.797 20.9319   4
  -5  -8  -4 665.980 28.0002   3
   5   8   4 657.222 23.5817   1
   5   8   4 630.087 35.4369   2
  -6  -8  -4 339.342 14.6743   4
  -6  -8  -4 357.653 14.4155   4
  -6  -8  -4 350.931 19.8325   3
   6   8   4 333.488 26.5809   2
   6   8   4 381.973 17.4966   1
  -7  -8  -4 209.793 15.1262   3
  -7  -8  -4 183.764 11.1387   4
   7   8   4 169.974 12.0095   1
 -11   9   4 355.939 20.1656   4
 -11   9   4 366.801 27.9745   2
 -10   9   4 220.841 10.7132   3
 -10   9   4 215.937 14.4107   4
 -10   9   4 203.201 19.7535   2
  -9   9   4 308.480 16.4470   4
  -9   9   4 329.640 24.0970   2
  -9   9   4 290.366 15.2082   3
  -9   9   4 331.279 14.7873   3
   8  -9  -4 404.781 16.6387   3
  -8   9   4 396.199 16.7312   3
  -8   9   4 355.820 24.5154   2
  -8   9   4 400.084 17.5619   4
   7  -9  -4 153.037 9.91182   3
  -7   9   4 140.768 8.88190   4
  -7   9   4 144.419 9.82404   3
  -7   9   4 156.206 15.0501   2
   6  -9  -4 247.887 13.3887   3
  -6   9   4 236.151 8.29438   1
  -6   9   4 257.285 10.7541   4
  -6   9   4 262.664 19.0606   2
  -6   9   4 250.305 11.0120   4
   5  -9  -4 154.050 10.5292   3
  -5   9   4 142.488 6.65482   4
  -5   9   4 142.073 6.14647   1
  -5   9   4 155.011 14.3101   2
  -5   9   4 148.400 6.60755   4
   4  -9  -4 58.5481 7.98655   3
  -4   9   4 67.5709 12.3186   2
  -4   9   4 48.8963 3.58725   1
   3  -9  -4 35.1167 5.80162   3
  -3   9   4 34.7130 7.58505   2
  -3   9   4 40.9058 3.41800   1
   2  -9  -4 142.005 10.7402   3
  -2   9   4 150.892 7.22790   1
  -2   9   4 133.952 13.0223   2
   1  -9  -4 93.9599 8.82972   3
  -1   9   4 86.3686 5.62095   1
  -1   9   4 88.7850 13.3642   2
   0  -9  -4 73.8867 9.15384   3
   0   9   4 97.0723 6.28710   1
   0   9   4 101.167 15.2341   2
  -1  -9  -4 152.397 19.6783   3
   1   9   4 139.440 8.11742   1
   1   9   4 102.194 20.9613   2
  -2  -9  -4 40.2030 7.21535   3
   2   9   4 51.7585 5.91381   1
   2   9   4 59.4918 12.4077   2
  -3  -9  -4 259.384 16.4096   3
   3   9   4 284.432 13.3964   1
   3   9   4 274.351 21.2521   2
  -4  -9  -4 312.050 18.2530   3
  -4  -9  -4 285.165 8.95337   4
  -4  -9  -4 274.901 9.03431   4
   4   9   4 281.873 14.1535   1
   4   9   4 292.756 23.1928   2
  -5  -9  -4 369.186 20.6121   3
  -5  -9  -4 336.780 12.0242   4
   5   9   4 367.975 27.2129   2
   5   9   4 367.100 17.0398   1
  -6  -9  -4 326.395 19.6879   3
   6   9   4 281.313 15.5812   1
   6   9   4 264.363 27.3057   2
  -7  -9  -4 97.9539 14.1549   3
   7   9   4 123.410 10.4701   1
   7   9   4 153.532 24.3868   2
 -10  10   4 651.132 23.1120   3
 -10  10   4 655.845 26.9455   4
 -10  10   4 684.797 37.8861   2
  -9  10   4 377.005 17.9066   4
  -9  10   4 373.644 26.3736   2
   8 -10  -4 401.882 17.6132   3
  -8  10   4 394.151 16.9711   4
  -8  10   4 361.282 25.1540   2
   7 -10  -4 918.010 30.4457   3
  -7  10   4 872.259 39.7753   2
  -7  10   4 905.621 27.0417   4
  -7  10   4 848.192 25.7831   4
   6 -10  -4 985.364 32.8510   3
  -6  10   4 971.127 41.2385   2
  -6  10   4 992.884 26.7788   4
  -6  10   4 978.794 25.9633   4
   5 -10  -4 1475.76 43.6324   3
  -5  10   4 1426.12 32.5770   4
  -5  10   4 1404.61 34.4140   1
  -5  10   4 1517.65 53.5066   2
  -5  10   4 1412.77 32.8913   4
   4 -10  -4 1685.25 49.6391   3
  -4  10   4 1767.42 58.8223   2
  -4  10   4 1665.62 40.4329   1
   3 -10  -4 1194.50 39.1649   3
  -3  10   4 1184.64 30.7457   1
  -3  10   4 1233.12 46.2167   2
   2 -10  -4 1123.94 43.2026   3
  -2  10   4 1068.25 29.2307   1
  -2  10   4 1120.53 43.8458   2
   1 -10  -4 441.791 21.6554   3
  -1  10   4 479.920 16.2771   1
   0 -10  -4 1006.39 36.1598   3
   0  10   4 981.505 28.5016   1
   0  10   4 1000.28 41.7930   2
  -1 -10  -4 581.825 26.0683   3
   1  10   4 585.324 20.2515   1
   1  10   4 579.037 30.9579   2
  -2 -10  -4 195.787 14.3835   3
   2  10   4 208.787 11.2469   1
  -3 -10  -4 296.807 18.2012   3
   3  10   4 283.673 14.1140   1
   3  10   4 264.326 21.8894   2
  -4 -10  -4 241.061 16.7051   3
   4  10   4 256.660 22.2876   2
   4  10   4 221.476 12.9833   1
  -5 -10  -4 187.511 15.0665   3
   5  10   4 177.659 14.6115   1
  -6 -10  -4 51.7082 10.0852   3
   6  10   4 53.4723 8.23813   1
   6  10   4 37.0032 10.2350   2
 -10  11   4 6.81870 3.06056   3
 -10  11   4 6.77956 2.93625   4
 -10  11   4 3.03255 3.41569   2
   9 -11  -4 2.22452 1.86622   3
  -9  11   4 0.82464 1.29011   4
  -9  11   4 -1.2068 1.28039   2
   8 -11  -4 3.44850 2.37526   3
  -8  11   4 11.1307 5.94440   2
  -8  11   4 9.52711 3.04828   4
   7 -11  -4 2.15706 2.18277   3
  -7  11   4 2.15695 1.83006   4
  -7  11   4 3.80298 4.18872   2
  -6  11   4 18.6498 2.56602   4
  -6  11   4 22.8427 7.23967   2
   5 -11  -4 89.9188 9.03957   3
  -5  11   4 77.4953 11.6739   2
   4 -11  -4 54.9636 9.09493   3
  -4  11   4 46.4474 8.98387   2
   3 -11  -4 126.747 11.2541   3
  -3  11   4 125.936 7.00719   1
  -3  11   4 134.246 14.2519   2
   2 -11  -4 231.328 15.1754   3
  -2  11   4 196.790 9.55293   1
  -2  11   4 190.755 16.9355   2
   1 -11  -4 358.205 19.8488   3
  -1  11   4 332.408 13.7335   1
  -1  11   4 359.852 23.7259   2
   0 -11  -4 422.459 21.7490   3
   0  11   4 385.738 25.0831   2
   0  11   4 369.467 15.3231   1
  -1 -11  -4 370.235 20.7742   3
   1  11   4 354.624 24.6419   2
   1  11   4 318.639 14.6267   1
  -2 -11  -4 456.916 23.9354   3
   2  11   4 423.559 18.0673   1
  -3 -11  -4 395.296 22.6494   3
   3  11   4 424.018 29.0094   2
   3  11   4 408.216 18.2248   1
  -4 -11  -4 272.129 19.0475   3
   4  11   4 273.181 15.1643   1
   4  11   4 316.613 27.3647   2
   8 -12  -4 334.347 17.7214   3
  -8  12   4 328.970 24.9046   2
  -8  12   4 337.892 13.8146   4
   7 -12  -4 346.015 18.4734   3
  -7  12   4 312.730 11.2231   4
  -7  12   4 338.399 24.7005   2
   6 -12  -4 323.729 18.3048   3
  -6  12   4 364.483 25.0786   2
   5 -12  -4 354.732 19.5730   3
  -5  12   4 352.862 24.5605   2
   4 -12  -4 409.446 21.1664   3
  -4  12   4 408.769 26.1033   2
   3 -12  -4 349.922 19.8696   3
  -3  12   4 364.855 24.6841   2
   2 -12  -4 331.897 19.7150   3
  -2  12   4 324.515 23.6331   2
   1 -12  -4 618.646 28.4730   3
  -1  12   4 675.615 34.9091   2
   0 -12  -4 288.318 18.7685   3
   0  12   4 265.432 21.7408   2
  -1 -12  -4 29.2502 7.77380   3
   1  12   4 39.2214 9.61497   2
  -2 -12  -4 7.27759 4.24858   3
   2  12   4 11.3477 6.89890   2
  -3 -12  -4 9.94787 4.49384   3
   3  12   4 11.4639 5.58141   2
   7 -13  -4 50.9537 9.21750   3
  -7  13   4 41.2424 9.89169   2
   6 -13  -4 59.9896 9.86590   3
  -6  13   4 52.3310 11.0857   2
   5 -13  -4 129.696 11.9580   3
  -5  13   4 129.612 22.6604   2
   4 -13  -4 185.852 14.6434   3
  -4  13   4 150.000 20.5389   2
   3 -13  -4 459.602 24.0147   3
  -3  13   4 468.061 29.2426   2
   2 -13  -4 372.920 21.7293   3
  -2  13   4 363.279 25.7185   2
  -1  13   4 297.820 23.7481   2
   0 -13  -4 240.520 17.9315   3
   0  13   4 220.859 23.3256   2
  -1 -13  -4 717.611 32.9299   3
   1  13   4 670.109 38.1627   2
   3 -14  -4 35.5684 8.06937   3
  -3  14   4 39.0042 9.61954   2
  -2  15  -5 239.037 16.0444   2
   2 -15   5 239.777 18.2200   3
  -3  15  -5 63.6218 9.84227   2
  -3  15  -5 51.8616 10.1593   3
  -4  15  -5 61.9944 10.3629   2
  -4  15  -5 62.7665 8.52262   4
  -4  15  -5 49.8417 10.2524   3
   2  14  -5 240.839 21.3127   2
  -2 -14   5 204.687 16.3758   3
   1  14  -5 329.328 19.3999   2
  -1 -14   5 334.229 20.6618   3
  -1 -14   5 235.903 12.3759   4
   0  14  -5 210.085 15.0058   2
   0 -14   5 230.599 11.7077   4
   0 -14   5 205.490 21.0340   3
  -1  14  -5 419.355 21.2021   2
   1 -14   5 438.281 17.4196   4
   1 -14   5 388.947 26.5412   3
  -2  14  -5 496.861 23.0340   2
   2 -14   5 478.561 14.5831   1
   2 -14   5 479.148 19.3034   4
   2 -14   5 504.891 26.1230   3
  -3  14  -5 663.724 32.1733   3
  -3  14  -5 634.366 26.8775   2
   3 -14   5 653.965 24.0742   4
   3 -14   5 664.707 30.3315   3
  -4  14  -5 595.482 30.0841   3
  -4  14  -5 552.671 25.1437   2
   4 -14   5 506.140 21.6751   4
  -5  14  -5 326.658 24.5995   3
  -5  14  -5 308.091 18.0101   2
  -5  14  -5 280.001 16.4438   4
  -6  14  -5 239.996 15.5163   4
  -7  14  -5 378.336 21.0212   4
  -7  14  -5 415.731 22.9355   2
  -7  14  -5 386.811 24.1008   3
   4  13  -5 171.244 15.6730   2
  -4 -13   5 181.868 14.7484   3
   3  13  -5 150.022 13.9666   2
  -3 -13   5 152.116 9.56754   4
  -3 -13   5 143.014 13.1873   3
   2  13  -5 184.775 14.5477   2
  -2 -13   5 185.166 14.7258   3
  -2 -13   5 160.028 9.91156   4
   1  13  -5 48.6293 8.67244   2
  -1 -13   5 53.0266 6.64314   4
  -1 -13   5 38.2726 8.18696   3
   0  13  -5 91.1532 11.6910   2
   0 -13   5 81.0152 11.8313   3
   0 -13   5 83.3539 6.91878   4
  -1  13  -5 8.07585 3.60919   2
  -1  13  -5 3.69666 2.64897   2
   1 -13   5 7.95015 4.39948   3
   1 -13   5 2.46453 1.59902   1
   1 -13   5 11.9433 3.19532   4
  -2  13  -5 14.1439 4.78307   2
  -2  13  -5 15.0822 4.55098   2
   2 -13   5 14.3067 2.54986   1
   2 -13   5 10.1897 4.88546   3
   2 -13   5 12.5621 3.65170   4
  -3  13  -5 -0.7956 1.08384   2
  -3  13  -5 -1.3645 1.59429   3
  -3  13  -5 0.46098 1.54747   2
   3 -13   5 -0.9638 2.17999   3
   3 -13   5 0.57649 1.29539   4
   3 -13   5 2.34322 1.10920   1
  -4  13  -5 0.59290 1.59242   2
  -4  13  -5 0.87046 2.38425   3
   4 -13   5 -1.0439 1.02036   4
  -5  13  -5 94.4955 12.7636   3
  -5  13  -5 115.038 10.4639   2
   5 -13   5 115.043 9.77422   4
  -6  13  -5 2.07214 2.08617   2
  -6  13  -5 1.52613 2.43696   3
  -6  13  -5 3.75198 2.87823   4
  -7  13  -5 14.5333 4.89750   4
  -7  13  -5 17.4693 6.42138   3
  -8  13  -5 37.7609 8.52509   2
  -8  13  -5 38.0817 8.98204   3
  -8  13  -5 40.0533 7.99753   4
   5  12  -5 372.266 24.4421   2
  -5 -12   5 412.748 21.9176   3
  -5 -12   5 407.674 18.1453   4
   4  12  -5 375.281 22.8606   2
  -4 -12   5 368.019 20.5255   3
  -4 -12   5 369.779 16.6606   4
   3  12  -5 455.627 22.1044   1
   3  12  -5 499.112 25.2975   2
  -3 -12   5 485.165 23.8370   3
  -3 -12   5 487.421 19.0283   4
   2  12  -5 549.910 21.0575   1
   2  12  -5 569.822 25.9248   2
  -2 -12   5 546.112 20.2018   4
  -2 -12   5 572.336 26.0415   3
   1  12  -5 496.482 22.6941   2
   1  12  -5 496.738 18.6664   1
  -1 -12   5 442.248 16.3789   1
  -1 -12   5 510.204 24.3093   3
  -1 -12   5 522.629 19.1365   4
  -1 -12   5 491.081 21.9762   2
   0  12  -5 480.935 21.4192   2
   0  12  -5 465.972 17.3858   1
   0  12  -5 489.507 21.9791   4
   0 -12   5 520.177 18.9559   4
   0 -12   5 498.669 23.9033   3
   0 -12   5 500.507 16.1927   1
   0 -12   5 480.539 21.5095   2
  -1  12  -5 699.101 24.7872   4
  -1  12  -5 712.311 22.4955   1
  -1  12  -5 725.789 27.0149   2
   1 -12   5 736.864 24.6939   4
   1 -12   5 749.652 20.5736   1
   1 -12   5 738.442 30.1657   3
  -2  12  -5 417.459 18.5347   2
  -2  12  -5 348.390 20.8799   2
   2 -12   5 380.684 16.5622   4
   2 -12   5 395.088 20.9505   3
   2 -12   5 385.608 12.0542   1
  -3  12  -5 490.033 24.9470   3
  -3  12  -5 478.668 26.2904   2
  -3  12  -5 489.386 21.0490   2
   3 -12   5 469.040 19.5661   4
   3 -12   5 493.013 13.1731   1
  -4  12  -5 667.441 29.6793   3
  -4  12  -5 617.222 27.7017   2
  -4  12  -5 667.270 25.7113   2
   4 -12   5 641.260 24.6272   4
  -5  12  -5 361.076 18.5559   2
  -5  12  -5 317.759 24.4692   2
  -5  12  -5 370.141 21.2933   3
   5 -12   5 346.475 17.7110   4
  -6  12  -5 439.866 21.9150   4
  -6  12  -5 455.188 24.2731   3
  -6  12  -5 425.114 21.4455   2
  -7  12  -5 360.046 20.4968   2
  -7  12  -5 386.999 22.4018   3
  -7  12  -5 355.200 19.9988   4
  -8  12  -5 343.175 20.4339   4
  -8  12  -5 335.455 20.7155   2
  -8  12  -5 317.418 20.5187   3
  -9  12  -5 127.439 15.1104   4
  -9  12  -5 136.203 13.8220   2
  -9  12  -5 142.428 13.4571   3
   6  11  -5 81.1570 9.97694   1
   6  11  -5 106.518 16.9335   2
  -6 -11   5 87.1024 8.28671   4
  -6 -11   5 111.239 10.5490   3
   5  11  -5 94.2833 16.5570   2
   5  11  -5 82.6233 9.56690   1
  -5 -11   5 73.7909 10.3851   4
  -5 -11   5 98.9429 12.2886   3
   4  11  -5 60.5000 8.15254   1
   4  11  -5 61.8922 10.9472   2
  -4 -11   5 61.2623 7.85650   4
  -4 -11   5 52.2658 8.49649   3
   3  11  -5 -0.1495 0.95372   2
   3  11  -5 0.00197 1.16144   1
  -3 -11   5 2.14115 1.54906   1
  -3 -11   5 -0.1338 2.21438   3
  -3 -11   5 5.72057 2.43366   4
   2  11  -5 85.1217 11.1683   2
   2  11  -5 82.7510 6.94955   1
  -2 -11   5 82.9797 10.7349   3
  -2 -11   5 82.2209 6.86036   4
  -2 -11   5 66.9499 9.07620   2
   1  11  -5 23.6661 5.54504   2
   1  11  -5 20.1112 3.88576   1
   1  11  -5 16.0283 4.04767   4
  -1 -11   5 23.6565 4.34152   4
  -1 -11   5 21.7591 5.77059   3
  -1 -11   5 16.3458 3.23319   1
  -1 -11   5 21.2566 4.96306   2
   0  11  -5 17.1270 4.35276   2
   0  11  -5 16.3773 3.85406   4
   0  11  -5 19.9097 3.79510   1
   0 -11   5 14.0020 4.29251   3
   0 -11   5 18.5870 4.60572   2
   0 -11   5 17.6306 3.04535   1
[truncated: 508,528 more chars]
