# Supplementary material for: Synthesis, Crystal Structure and Spin-Orbit Coupling Analysis for Mono-Scorpionate Eu(III) Complexes
Source: Preprints.org preprint supplement (doi:10.20944/preprints202308.1806.v1), 2023-08-25
Supplement: Supplementary file 1 [file supplementary › PPR2.cif]

data_ppr2
_audit_creation_date               2023-07-28
_audit_creation_method
;
Olex2 1.5
(compiled 2023.03.06 svn.rbb2c1857 for OlexSys, GUI svn.r6748)
;
_shelx_SHELXL_version_number       '2014/7'
_audit_contact_author_address      ?
_audit_contact_author_email        ?
_audit_contact_author_name         ''
_audit_contact_author_phone        ?
_publ_contact_author_id_orcid      ?
_publ_section_references
;
Dolomanov, O.V., Bourhis, L.J., Gildea, R.J, Howard, J.A.K. & Puschmann, H.
 (2009), J. Appl. Cryst. 42, 339-341.

Sheldrick, G.M. (2015). Acta Cryst. A71, 3-8.

Sheldrick, G.M. (2015). Acta Cryst. C71, 3-8.
;
_chemical_name_common              ?
_chemical_name_systematic          ?
_chemical_formula_moiety          
 '2(C13 H12 Eu F9 N6 O10 S3), 0.682(C4 H10 O), 2(C2 H3 N)'
_chemical_formula_sum              'C32.90 H37.24 Eu2 F18 N14 O20.73 S6'
_chemical_formula_weight           1798.66
_chemical_melting_point            ?
loop_
  _atom_type_symbol
  _atom_type_description
  _atom_type_scat_dispersion_real
  _atom_type_scat_dispersion_imag
  _atom_type_scat_source
 'C' 'C' 0.0033 0.0016 'International Tables Vol C Tables 4.2.6.8 and 6.1.1.4'
 'H' 'H' 0.0000 0.0000 'International Tables Vol C Tables 4.2.6.8 and 6.1.1.4'
 'Eu' 'Eu' -0.1578 3.6682
 'International Tables Vol C Tables 4.2.6.8 and 6.1.1.4'
 'F' 'F' 0.0171 0.0103 'International Tables Vol C Tables 4.2.6.8 and 6.1.1.4'
 'N' 'N' 0.0061 0.0033 'International Tables Vol C Tables 4.2.6.8 and 6.1.1.4'
 'O' 'O' 0.0106 0.0060 'International Tables Vol C Tables 4.2.6.8 and 6.1.1.4'
 'S' 'S' 0.1246 0.1234 'International Tables Vol C Tables 4.2.6.8 and 6.1.1.4'

_shelx_space_group_comment
;
The symmetry employed for this shelxl refinement is uniquely defined
by the following loop, which should always be used as a source of
symmetry information in preference to the above space-group names.
They are only intended as comments.
;
_space_group_crystal_system        'monoclinic'
_space_group_IT_number             14
_space_group_name_H-M_alt          'P 1 21/c 1'
_space_group_name_Hall             '-P 2ybc'
loop_
  _space_group_symop_operation_xyz
 'x, y, z'
 '-x, y+1/2, -z+1/2'
 '-x, -y, -z'
 'x, -y-1/2, z-1/2'

_cell_length_a                     21.596(3)
_cell_length_b                     17.912(2)
_cell_length_c                     18.668(2)
_cell_angle_alpha                  90
_cell_angle_beta                   115.419(4)
_cell_angle_gamma                  90
_cell_volume                       6522.3(14)
_cell_formula_units_Z              4
_cell_measurement_reflns_used      7548
_cell_measurement_temperature      150(2)
_cell_measurement_theta_max        25.40
_cell_measurement_theta_min        2.22
_shelx_estimated_absorpt_T_max     0.936
_shelx_estimated_absorpt_T_min     0.776
_exptl_absorpt_coefficient_mu      2.224
_exptl_absorpt_correction_T_max    0.7453
_exptl_absorpt_correction_T_min    0.6018
_exptl_absorpt_correction_type     multi-scan
_exptl_absorpt_process_details
;
SADABS-2016/2 (Bruker,2016/2) was used for absorption correction.
wR2(int) was 0.0724 before and 0.0553 after correction.
The Ratio of minimum to maximum transmission is 0.8075.
The \l/2 correction factor is Not present.
;
_exptl_absorpt_special_details     ?
_exptl_crystal_colour              colourless
_exptl_crystal_colour_primary      colourless
_exptl_crystal_density_diffrn      1.832
_exptl_crystal_density_meas        ?
_exptl_crystal_density_method      ?
_exptl_crystal_description         plate
_exptl_crystal_F_000               3530
_exptl_crystal_size_max            0.12
_exptl_crystal_size_mid            0.1
_exptl_crystal_size_min            0.03
_exptl_transmission_factor_max     ?
_exptl_transmission_factor_min     ?
_diffrn_reflns_av_R_equivalents    0.0813
_diffrn_reflns_av_unetI/netI       0.0669
_diffrn_reflns_Laue_measured_fraction_full  0.990
_diffrn_reflns_Laue_measured_fraction_max  0.981
_diffrn_reflns_limit_h_max         24
_diffrn_reflns_limit_h_min         -26
_diffrn_reflns_limit_k_max         21
_diffrn_reflns_limit_k_min         -21
_diffrn_reflns_limit_l_max         22
_diffrn_reflns_limit_l_min         -22
_diffrn_reflns_number              12125
_diffrn_reflns_point_group_measured_fraction_full  0.990
_diffrn_reflns_point_group_measured_fraction_max  0.981
_diffrn_reflns_theta_full          25.242
_diffrn_reflns_theta_max           25.742
_diffrn_reflns_theta_min           1.543
_diffrn_ambient_temperature        150(2)
_diffrn_detector                   PIXEL
_diffrn_detector_area_resol_mean   7.41
_diffrn_detector_type              'Bruker PHOTON III area detector'
_diffrn_measured_fraction_theta_full  0.990
_diffrn_measured_fraction_theta_max  0.981
_diffrn_measurement_device         'three-circle diffractometer'
_diffrn_measurement_device_type    'Bruker D8 Venture diffractometer'
_diffrn_measurement_method         '\w and \f scans'
_diffrn_radiation_monochromator    'Incoatec HELIOS multilayer mirrors'
_diffrn_radiation_type             'MoK\a'
_diffrn_radiation_wavelength       0.71073
_diffrn_source                     'Incoatec IuS3.0 microfocus X-ray tube'
_diffrn_source_current             1.4
_diffrn_source_power               0.07
_diffrn_source_voltage             50.0
_diffrn_standards_interval_count   .
_diffrn_standards_interval_time    .
_diffrn_standards_number           .
_reflns_Friedel_coverage           0.000
_reflns_Friedel_fraction_full      .
_reflns_Friedel_fraction_max       .
_reflns_number_gt                  8725
_reflns_number_total               12125
_reflns_special_details
;
 _reflns_Friedel_fraction is defined as the number of unique
 Friedel pairs measured divided by the number that would be
 possible theoretically, ignoring centric projections and
 systematic absences.
;
_reflns_threshold_expression       'I > 2\s(I)'
_computing_cell_refinement         'Bruker SAINT'
_computing_data_collection         'Bruker APEX3'
_computing_data_reduction          'Bruker SAINT'
_computing_molecular_graphics      'Olex2 1.5 (Dolomanov et al., 2009)'
_computing_publication_material    'Olex2 1.5 (Dolomanov et al., 2009)'
_computing_structure_refinement    'SHELXL 2014/7 (Sheldrick, 2015)'
_computing_structure_solution      'SHELXT  (Sheldrick, 2015)'
_refine_diff_density_max           1.530
_refine_diff_density_min           -2.087
_refine_diff_density_rms           0.169
_refine_ls_extinction_coef         .
_refine_ls_extinction_method       none
_refine_ls_goodness_of_fit_ref     1.050
_refine_ls_hydrogen_treatment      constr
_refine_ls_matrix_type             full
_refine_ls_number_parameters       841
_refine_ls_number_reflns           12125
_refine_ls_number_restraints       18
_refine_ls_R_factor_all            0.0943
_refine_ls_R_factor_gt             0.0612
_refine_ls_restrained_S_all        1.052
_refine_ls_shift/su_max            0.003
_refine_ls_shift/su_mean           0.000
_refine_ls_structure_factor_coef   Fsqd
_refine_ls_weighting_details      
 'w=1/[\s^2^(Fo^2^)+(0.0450P)^2^+92.1447P] where P=(Fo^2^+2Fc^2^)/3'
_refine_ls_weighting_scheme        calc
_refine_ls_wR_factor_gt            0.1337
_refine_ls_wR_factor_ref           0.1542
_refine_special_details
;
 Refined as a 2-component twin.
;
_olex2_refinement_description
;
1. Twinned data refinement
 Scales: 0.8964(8)
 0.1036(8)
2. Fixed Uiso
 At 1.2 times of:
  All C(H) groups, All C(H,H) groups
 At 1.5 times of:
  All C(H,H,H) groups, All O(H,H) groups
3. Uiso/Uaniso restraints and constraints
Uanis(C13) \\sim Ueq, Uanis(C22) \\sim Ueq, Uanis(F4) \\sim Ueq: with sigma of
0.01 and sigma for terminal atoms of 0.02
4. Others
 Sof(O1S)=Sof(C5S)=Sof(H5SA)=Sof(H5SB)=Sof(C6S)=Sof(H6SA)=Sof(H6SB)=Sof(H6SC)=
 Sof(C7S)=Sof(H7SA)=Sof(H7SB)=Sof(C8S)=Sof(H8SA)=Sof(H8SB)=Sof(H8SC)=FVAR(1)
5.a Free rotating group:
 O10(H10A,H10B), O20(H20A,H20B)
5.b Ternary CH refined with riding coordinates:
 C23(H23), C1(H1)
5.c Secondary CH2 refined with riding coordinates:
 C5S(H5SA,H5SB), C7S(H7SA,H7SB)
5.d Me refined with riding coordinates:
 C6S(H6SA,H6SB,H6SC), C8S(H8SA,H8SB,H8SC)
5.e Aromatic/amide H refined with riding coordinates:
 C4(H4), C5(H5), C6(H6), C7(H7), C8(H8), C11(H11), C16(H16), C19(H19),
 C26(H26), C9(H9), C13(H13), C14(H14), C15(H15), C17(H17), C20(H20), C21(H21),
 C22(H22), C25(H25)
5.f Idealised Me refined as rotating group:
 C2S(H2SA,H2SB,H2SC), C4S(H4SA,H4SB,H4SC)
;
_atom_sites_solution_hydrogens     mixed
_atom_sites_solution_primary       dual
_atom_sites_solution_secondary     ?
loop_
  _atom_site_label
  _atom_site_type_symbol
  _atom_site_fract_x
  _atom_site_fract_y
  _atom_site_fract_z
  _atom_site_U_iso_or_equiv
  _atom_site_adp_type
  _atom_site_occupancy
  _atom_site_site_symmetry_order
  _atom_site_calc_flag
  _atom_site_refinement_flags_posn
  _atom_site_refinement_flags_adp
  _atom_site_refinement_flags_occupancy
  _atom_site_disorder_assembly
  _atom_site_disorder_group
 Eu1 Eu 1.49723(3) 0.86384(3) 1.09839(3) 0.01917(13) Uani 1 1 d . . . . .
 S1 S 1.43469(13) 1.06083(14) 1.04646(14) 0.0208(5) Uani 1 1 d . . . . .
 S2 S 1.57878(14) 0.70595(15) 1.03557(15) 0.0254(6) Uani 1 1 d . . . . .
 S3 S 1.37917(13) 0.84373(14) 0.88997(14) 0.0227(5) Uani 1 1 d . . . . .
 F4 F 1.5471(5) 0.6226(4) 1.1303(4) 0.060(2) Uani 1 1 d . U . . .
 F7 F 1.2716(4) 0.7693(5) 0.8783(5) 0.068(3) Uani 1 1 d . . . . .
 F8 F 1.5755(6) 0.5627(4) 1.0491(6) 0.073(3) Uani 1 1 d . . . . .
 F10 F 1.4757(5) 0.6156(5) 1.0061(5) 0.059(2) Uani 1 1 d . . . . .
 F12 F 1.3267(4) 1.1435(4) 0.9750(5) 0.056(2) Uani 1 1 d . . . . .
 F14 F 1.3151(4) 1.0306(5) 0.9331(5) 0.057(2) Uani 1 1 d . . . . .
 F15 F 1.3137(4) 1.0559(5) 1.0446(5) 0.064(2) Uani 1 1 d . . . . .
 F17 F 1.2582(4) 0.8289(6) 0.7736(4) 0.070(3) Uani 1 1 d . . . . .
 F18 F 1.2592(4) 0.8879(5) 0.8750(5) 0.065(2) Uani 1 1 d . . . . .
 O1 O 1.4412(4) 0.9816(4) 1.0658(4) 0.0242(16) Uani 1 1 d . . . . .
 O2 O 1.4562(4) 1.1097(4) 1.1133(4) 0.0310(18) Uani 1 1 d . . . . .
 O3 O 1.4580(4) 1.0788(4) 0.9859(4) 0.0269(17) Uani 1 1 d . . . . .
 O4 O 1.4010(4) 0.8430(4) 0.9753(4) 0.0273(17) Uani 1 1 d . . . . .
 O5 O 1.4005(4) 0.7802(5) 0.8594(5) 0.040(2) Uani 1 1 d . . . . .
 O6 O 1.3858(4) 0.9147(4) 0.8588(5) 0.039(2) Uani 1 1 d . . . . .
 O7 O 1.5397(4) 0.7644(4) 1.0519(4) 0.0264(16) Uani 1 1 d . . . . .
 O8 O 1.6483(4) 0.7032(5) 1.0899(5) 0.039(2) Uani 1 1 d . . . . .
 O9 O 1.5644(4) 0.7001(4) 0.9541(4) 0.0339(19) Uani 1 1 d . . . . .
 O10 O 1.5904(4) 0.9436(4) 1.1756(4) 0.0298(18) Uani 1 1 d G . . . .
 H10A H 1.6000 0.9900 1.1698 0.045 Uiso 1 1 d G U . . .
 H10B H 1.6044 0.9389 1.2269 0.045 Uiso 1 1 d G U . . .
 N1 N 1.5768(4) 0.7932(5) 1.2198(5) 0.0224(19) Uani 1 1 d . . . . .
 N2 N 1.5619(4) 0.7681(5) 1.2791(5) 0.0239(19) Uani 1 1 d . . . . .
 N3 N 1.4681(5) 0.8960(5) 1.2127(5) 0.027(2) Uani 1 1 d . . . . .
 N4 N 1.4679(4) 0.8458(5) 1.2679(5) 0.0226(19) Uani 1 1 d . . . . .
 N5 N 1.4327(4) 0.7566(5) 1.1261(5) 0.0212(18) Uani 1 1 d . . . . .
 N6 N 1.4460(4) 0.7307(5) 1.1994(5) 0.025(2) Uani 1 1 d . . . . .
 C2 C 1.3417(6) 1.0726(7) 0.9962(7) 0.037(3) Uani 1 1 d . . . . .
 C4 C 1.6425(6) 0.7772(6) 1.2434(6) 0.027(2) Uani 1 1 d . . . . .
 H4 H 1.6677 0.7885 1.2138 0.033 Uiso 1 1 calc R U . . .
 C5 C 1.4160(6) 0.6641(6) 1.1970(6) 0.030(3) Uani 1 1 d . . . . .
 H5 H 1.4197 0.6352 1.2413 0.036 Uiso 1 1 calc R U . . .
 C6 C 1.3914(6) 0.7057(7) 1.0775(7) 0.035(3) Uani 1 1 d . . . . .
 H6 H 1.3721 0.7089 1.0213 0.042 Uiso 1 1 calc R U . . .
 C7 C 1.4250(7) 0.9476(6) 1.2929(7) 0.039(3) Uani 1 1 d . . . . .
 H7 H 1.4047 0.9826 1.3148 0.047 Uiso 1 1 calc R U . . .
 C8 C 1.6168(6) 0.7374(6) 1.3382(7) 0.030(2) Uani 1 1 d . . . . .
 H8 H 1.6184 0.7165 1.3857 0.035 Uiso 1 1 calc R U . . .
 C11 C 1.4433(6) 0.8754(6) 1.3159(6) 0.032(3) Uani 1 1 d . . . . .
 H11 H 1.4391 0.8507 1.3586 0.038 Uiso 1 1 calc R U . . .
 C12 C 1.5426(7) 0.6210(7) 1.0570(8) 0.043(3) Uani 1 1 d . . . . .
 C16 C 1.6702(6) 0.7417(6) 1.3174(7) 0.033(3) Uani 1 1 d . . . . .
 H16 H 1.7159 0.7245 1.3466 0.040 Uiso 1 1 calc R U . . .
 C18 C 1.2868(7) 0.8328(8) 0.8524(7) 0.041(3) Uani 1 1 d . . . . .
 C19 C 1.4432(6) 0.9586(6) 1.2291(6) 0.032(3) Uani 1 1 d . . . . .
 H19 H 1.4382 1.0044 1.2016 0.038 Uiso 1 1 calc R U . . .
 C23 C 1.4921(5) 0.7699(6) 1.2696(6) 0.024(2) Uani 1 1 d . . . . .
 H23 H 1.4907 0.7443 1.3164 0.029 Uiso 1 1 calc R U . . .
 C26 C 1.3796(7) 0.6462(7) 1.1194(7) 0.040(3) Uani 1 1 d . . . . .
 H26 H 1.3521 0.6031 1.0981 0.048 Uiso 1 1 calc R U . . .
 Eu2 Eu 0.99043(3) 0.86865(3) 1.09758(3) 0.02075(14) Uani 1 1 d . . . . .
 S4 S 0.89900(15) 0.71503(15) 0.95159(15) 0.0290(6) Uani 1 1 d . . . . .
 S5 S 1.11178(14) 0.83288(15) 1.01150(16) 0.0268(6) Uani 1 1 d . . . . .
 S6 S 1.06868(14) 1.05784(15) 1.11363(14) 0.0238(6) Uani 1 1 d . . . . .
 F1 F 0.9957(5) 0.6193(4) 1.0279(4) 0.056(2) Uani 1 1 d . . . . .
 F2 F 0.9251(5) 0.6356(4) 1.0796(4) 0.056(2) Uani 1 1 d . . . . .
 F3 F 0.8954(5) 0.5721(4) 0.9714(5) 0.077(3) Uani 1 1 d . . . . .
 F5 F 1.2311(5) 0.8714(7) 1.1210(7) 0.096(4) Uani 1 1 d . . . . .
 F6 F 1.2351(5) 0.8076(6) 1.0260(6) 0.083(3) Uani 1 1 d . . . . .
 F9 F 1.1875(4) 1.0173(5) 1.1192(6) 0.068(3) Uani 1 1 d . . . . .
 F11 F 1.1892(4) 1.0481(6) 1.2313(5) 0.074(3) Uani 1 1 d . . . . .
 F13 F 1.2118(4) 0.7540(6) 1.1129(6) 0.084(3) Uani 1 1 d . . . . .
 F16 F 1.1805(4) 1.1320(5) 1.1473(6) 0.068(3) Uani 1 1 d . . . . .
 O11 O 0.9399(4) 0.7734(4) 1.0055(4) 0.0296(17) Uani 1 1 d . . . . .
 O12 O 0.9148(5) 0.7048(5) 0.8850(4) 0.039(2) Uani 1 1 d . . . . .
 O13 O 0.8283(4) 0.7167(5) 0.9348(5) 0.047(2) Uani 1 1 d . . . . .
 O14 O 1.0854(4) 0.8368(4) 1.0712(4) 0.0302(17) Uani 1 1 d . . . . .
 O15 O 1.1099(5) 0.9020(5) 0.9726(5) 0.043(2) Uani 1 1 d . . . . .
 O16 O 1.0874(5) 0.7680(5) 0.9622(5) 0.050(2) Uani 1 1 d . . . . .
 O17 O 1.0569(4) 0.9811(4) 1.1284(4) 0.0301(17) Uani 1 1 d . . . . .
 O18 O 1.0498(4) 1.1117(4) 1.1573(5) 0.0358(19) Uani 1 1 d . . . . .
 O19 O 1.0469(4) 1.0730(4) 1.0309(4) 0.0290(17) Uani 1 1 d . . . . .
 O20 O 0.9024(4) 0.9542(4) 1.0816(5) 0.0344(19) Uani 1 1 d G . . . .
 H20A H 0.8971 0.9955 1.0550 0.052 Uiso 1 1 d G U . . .
 H20B H 0.8879 0.9647 1.1173 0.052 Uiso 1 1 d G U . . .
 N7 N 0.9048(4) 0.8068(5) 1.1381(5) 0.0227(19) Uani 1 1 d . . . . .
 N8 N 0.9197(4) 0.7749(5) 1.2103(4) 0.0184(17) Uani 1 1 d . . . . .
 N9 N 1.0179(5) 0.9007(5) 1.2409(5) 0.030(2) Uani 1 1 d . . . . .
 N10 N 1.0126(5) 0.8515(5) 1.2935(5) 0.026(2) Uani 1 1 d . . . . .
 N11 N 1.0473(4) 0.7577(5) 1.1865(5) 0.0244(19) Uani 1 1 d . . . . .
 N12 N 1.0340(5) 0.7345(5) 1.2483(5) 0.026(2) Uani 1 1 d . . . . .
 C1 C 0.9879(5) 0.7760(6) 1.2716(6) 0.022(2) Uani 1 1 d . . . . .
 H1 H 0.9875 0.7511 1.3194 0.026 Uiso 1 1 calc R U . . .
 C3 C 0.9303(8) 0.6311(7) 1.0098(7) 0.040(3) Uani 1 1 d . . . . .
 C9 C 1.0638(6) 0.6678(6) 1.2773(7) 0.031(3) Uani 1 1 d . . . . .
 H9 H 1.0602 0.6400 1.3187 0.037 Uiso 1 1 calc R U . . .
 C10 C 1.2035(8) 0.8158(9) 1.0726(9) 0.055(4) Uani 1 1 d . . . . .
 C13 C 1.0288(8) 0.8839(7) 1.3656(7) 0.048(3) Uani 1 1 d . U . . .
 H13 H 1.0291 0.8608 1.4116 0.058 Uiso 1 1 calc R U . . .
 C14 C 1.0999(5) 0.6480(6) 1.2359(6) 0.027(2) Uani 1 1 d . . . . .
 H14 H 1.1273 0.6046 1.2434 0.033 Uiso 1 1 calc R U . . .
 C15 C 0.8092(5) 0.7549(7) 1.1388(6) 0.030(3) Uani 1 1 d . . . . .
 H15 H 0.7629 0.7397 1.1214 0.036 Uiso 1 1 calc R U . . .
 C17 C 0.8385(6) 0.7943(6) 1.0963(6) 0.029(2) Uani 1 1 d . . . . .
 H17 H 0.8135 0.8103 1.0430 0.035 Uiso 1 1 calc R U . . .
 C20 C 1.0371(8) 0.9639(7) 1.2802(8) 0.052(4) Uani 1 1 d . . . . .
 H20 H 1.0451 1.0090 1.2587 0.063 Uiso 1 1 calc R U . . .
 C21 C 1.0885(6) 0.7047(6) 1.1801(7) 0.030(3) Uani 1 1 d . . . . .
 H21 H 1.1074 0.7056 1.1426 0.036 Uiso 1 1 calc R U . . .
 C22 C 1.0444(9) 0.9557(8) 1.3581(8) 0.062(4) Uani 1 1 d . U . . .
 H22 H 1.0577 0.9933 1.3978 0.074 Uiso 1 1 calc R U . . .
 C24 C 1.1619(7) 1.0627(8) 1.1543(9) 0.049(3) Uani 1 1 d . . . . .
 C25 C 0.8636(5) 0.7433(6) 1.2124(6) 0.028(2) Uani 1 1 d . . . . .
 H25 H 0.8618 0.7179 1.2561 0.033 Uiso 1 1 calc R U . . .
 O1S O 1.2408(11) 0.9277(12) 1.4622(13) 0.101(7) Uiso 0.682(17) 1 d . . P A 1
 C5S C 1.238(2) 0.906(2) 1.383(2) 0.120(13) Uiso 0.682(17) 1 d . . P A 1
 H5SA H 1.2385 0.8512 1.3777 0.144 Uiso 0.682(17) 1 calc R U P A 1
 H5SB H 1.1952 0.9255 1.3392 0.144 Uiso 0.682(17) 1 calc R U P A 1
 C6S C 1.284(2) 0.931(3) 1.379(3) 0.17(2) Uiso 0.682(17) 1 d . . P A 1
 H6SA H 1.2838 0.9188 1.3285 0.253 Uiso 0.682(17) 1 calc R U P A 1
 H6SB H 1.2820 0.9857 1.3845 0.253 Uiso 0.682(17) 1 calc R U P A 1
 H6SC H 1.3251 0.9117 1.4228 0.253 Uiso 0.682(17) 1 calc R U P A 1
 C7S C 1.199(2) 0.884(2) 1.487(3) 0.143(16) Uiso 0.682(17) 1 d . . P A 1
 H7SA H 1.1515 0.8831 1.4442 0.172 Uiso 0.682(17) 1 calc R U P A 1
 H7SB H 1.2160 0.8318 1.4958 0.172 Uiso 0.682(17) 1 calc R U P A 1
 C8S C 1.1974(19) 0.911(2) 1.557(2) 0.122(13) Uiso 0.682(17) 1 d . . P A 1
 H8SA H 1.1679 0.8793 1.5721 0.183 Uiso 0.682(17) 1 calc R U P A 1
 H8SB H 1.2440 0.9110 1.6001 0.183 Uiso 0.682(17) 1 calc R U P A 1
 H8SC H 1.1794 0.9623 1.5486 0.183 Uiso 0.682(17) 1 calc R U P A 1
 N1S N 0.8528(6) 0.9567(6) 1.1996(7) 0.051(3) Uani 1 1 d . . . . .
 C1S C 0.8200(6) 0.9427(7) 1.2294(7) 0.035(3) Uani 1 1 d . . . . .
 C2S C 0.7785(8) 0.9253(11) 1.2717(9) 0.068(5) Uani 1 1 d . . . . .
 H2SA H 0.7316 0.9135 1.2334 0.102 Uiso 1 1 calc R U . . .
 H2SB H 0.7778 0.9685 1.3036 0.102 Uiso 1 1 calc R U . . .
 H2SC H 0.7982 0.8823 1.3065 0.102 Uiso 1 1 calc R U . . .
 N2S N 0.6464(7) 0.5552(6) 0.8413(6) 0.053(3) Uani 1 1 d . . . . .
 C3S C 0.6786(7) 0.5773(7) 0.9029(8) 0.041(3) Uani 1 1 d . . . . .
 C4S C 0.7190(7) 0.6054(8) 0.9833(7) 0.046(3) Uani 1 1 d . . . . .
 H4SA H 0.7513 0.6433 0.9823 0.069 Uiso 1 1 calc R U . . .
 H4SB H 0.7445 0.5640 1.0177 0.069 Uiso 1 1 calc R U . . .
 H4SC H 0.6883 0.6275 1.0038 0.069 Uiso 1 1 calc R U . . .

loop_
  _atom_site_aniso_label
  _atom_site_aniso_U_11
  _atom_site_aniso_U_22
  _atom_site_aniso_U_33
  _atom_site_aniso_U_23
  _atom_site_aniso_U_13
  _atom_site_aniso_U_12
 Eu1 0.0270(3) 0.0189(3) 0.0152(3) 0.0015(2) 0.0125(2) 0.0011(2)
 S1 0.0302(14) 0.0198(13) 0.0171(12) 0.0040(10) 0.0148(11) 0.0059(10)
 S2 0.0366(15) 0.0238(14) 0.0229(13) 0.0001(10) 0.0195(12) 0.0026(11)
 S3 0.0289(14) 0.0234(13) 0.0174(12) 0.0000(10) 0.0116(11) -0.0001(10)
 F4 0.118(7) 0.047(5) 0.037(4) 0.013(3) 0.054(5) -0.005(4)
 F7 0.052(5) 0.073(6) 0.077(6) 0.006(5) 0.026(5) -0.025(4)
 F8 0.144(9) 0.020(4) 0.090(7) 0.009(4) 0.084(7) 0.020(5)
 F10 0.072(6) 0.055(5) 0.064(5) -0.020(4) 0.043(5) -0.031(4)
 F12 0.044(4) 0.035(4) 0.075(6) 0.014(4) 0.012(4) 0.016(3)
 F14 0.046(5) 0.061(5) 0.052(5) -0.019(4) 0.011(4) -0.004(4)
 F15 0.045(5) 0.097(7) 0.066(5) 0.012(5) 0.037(4) 0.008(4)
 F17 0.043(5) 0.124(8) 0.029(4) -0.014(5) 0.003(4) -0.007(5)
 F18 0.038(4) 0.085(7) 0.068(6) -0.025(5) 0.018(4) 0.010(4)
 O1 0.033(4) 0.019(4) 0.027(4) 0.009(3) 0.019(3) 0.011(3)
 O2 0.041(5) 0.035(4) 0.020(4) -0.008(3) 0.017(4) -0.003(4)
 O3 0.041(4) 0.028(4) 0.024(4) 0.008(3) 0.025(4) 0.000(3)
 O4 0.023(4) 0.046(5) 0.007(3) 0.008(3) 0.001(3) 0.003(3)
 O5 0.046(5) 0.036(5) 0.042(5) -0.009(4) 0.024(4) 0.008(4)
 O6 0.048(5) 0.032(5) 0.036(5) 0.008(4) 0.018(4) -0.007(4)
 O7 0.044(4) 0.018(4) 0.029(4) -0.006(3) 0.027(4) 0.001(3)
 O8 0.034(5) 0.047(5) 0.039(5) -0.004(4) 0.018(4) 0.004(4)
 O9 0.052(5) 0.031(4) 0.028(4) 0.002(3) 0.026(4) 0.006(4)
 O10 0.047(5) 0.026(4) 0.018(4) 0.003(3) 0.016(4) -0.009(4)
 N1 0.028(5) 0.026(5) 0.016(4) 0.005(3) 0.013(4) 0.003(4)
 N2 0.032(5) 0.027(5) 0.010(4) 0.006(3) 0.008(4) 0.003(4)
 N3 0.050(6) 0.025(5) 0.016(4) 0.003(4) 0.023(4) -0.001(4)
 N4 0.029(5) 0.025(5) 0.016(4) 0.004(3) 0.012(4) -0.002(4)
 N5 0.029(5) 0.021(4) 0.018(4) -0.002(3) 0.014(4) -0.010(4)
 N6 0.028(5) 0.029(5) 0.020(4) -0.004(4) 0.011(4) -0.014(4)
 C2 0.042(7) 0.032(7) 0.036(7) -0.006(5) 0.017(6) 0.004(5)
 C4 0.042(7) 0.026(6) 0.023(5) 0.002(4) 0.023(5) -0.001(5)
 C5 0.037(6) 0.026(6) 0.023(6) -0.001(5) 0.010(5) -0.010(5)
 C6 0.045(7) 0.044(7) 0.024(6) -0.001(5) 0.022(6) -0.008(6)
 C7 0.078(9) 0.028(6) 0.029(6) -0.001(5) 0.039(7) 0.009(6)
 C8 0.045(7) 0.016(5) 0.030(6) 0.001(4) 0.019(6) 0.000(5)
 C11 0.056(7) 0.032(6) 0.018(5) 0.000(5) 0.026(5) -0.001(5)
 C12 0.062(9) 0.022(6) 0.054(8) 0.000(6) 0.032(8) -0.003(6)
 C16 0.040(7) 0.027(6) 0.032(6) -0.002(5) 0.017(6) -0.002(5)
 C18 0.040(7) 0.043(8) 0.038(7) 0.005(6) 0.016(6) -0.006(6)
 C19 0.048(7) 0.029(6) 0.023(5) 0.009(5) 0.020(5) 0.005(5)
 C23 0.037(6) 0.018(5) 0.024(5) 0.010(4) 0.020(5) 0.008(5)
 C26 0.056(8) 0.031(7) 0.028(6) 0.001(5) 0.012(6) -0.021(6)
 Eu2 0.0287(3) 0.0200(3) 0.0160(3) 0.0020(2) 0.0119(2) -0.0002(2)
 S4 0.0430(17) 0.0251(14) 0.0195(13) -0.0003(11) 0.0141(13) -0.0033(12)
 S5 0.0349(15) 0.0256(14) 0.0256(14) 0.0045(11) 0.0185(12) 0.0044(12)
 S6 0.0335(14) 0.0236(14) 0.0160(12) -0.0006(10) 0.0122(11) -0.0049(11)
 F1 0.077(6) 0.049(5) 0.041(4) 0.012(4) 0.025(4) 0.028(4)
 F2 0.096(6) 0.045(5) 0.038(4) 0.010(3) 0.039(4) -0.004(4)
 F3 0.135(9) 0.029(4) 0.042(5) -0.001(4) 0.015(5) -0.024(5)
 F5 0.054(6) 0.112(9) 0.097(8) -0.022(7) 0.009(6) -0.008(6)
 F6 0.061(6) 0.119(9) 0.104(8) 0.040(6) 0.068(6) 0.039(5)
 F9 0.045(5) 0.070(6) 0.095(7) -0.017(5) 0.034(5) 0.005(4)
 F11 0.054(5) 0.099(7) 0.038(5) 0.024(5) -0.010(4) -0.006(5)
 F13 0.061(6) 0.105(8) 0.091(7) 0.069(6) 0.038(5) 0.046(6)
 F16 0.046(5) 0.047(5) 0.096(7) 0.009(5) 0.017(5) -0.015(4)
 O11 0.040(4) 0.027(4) 0.019(4) -0.004(3) 0.010(3) -0.008(3)
 O12 0.068(6) 0.041(5) 0.014(4) -0.001(3) 0.022(4) 0.001(4)
 O13 0.041(5) 0.056(6) 0.035(5) 0.004(4) 0.007(4) -0.011(4)
 O14 0.034(4) 0.038(5) 0.026(4) 0.008(3) 0.020(4) 0.005(4)
 O15 0.060(6) 0.029(5) 0.058(6) 0.020(4) 0.041(5) 0.012(4)
 O16 0.060(6) 0.037(5) 0.052(6) -0.019(4) 0.023(5) -0.002(4)
 O17 0.043(5) 0.028(4) 0.022(4) 0.000(3) 0.016(4) -0.011(3)
 O18 0.050(5) 0.024(4) 0.035(4) -0.008(3) 0.020(4) -0.002(4)
 O19 0.044(5) 0.030(4) 0.014(3) 0.002(3) 0.014(3) -0.004(3)
 O20 0.052(5) 0.031(4) 0.033(4) 0.019(4) 0.030(4) 0.011(4)
 N7 0.028(5) 0.025(5) 0.017(4) 0.005(3) 0.011(4) 0.002(4)
 N8 0.017(4) 0.030(5) 0.011(4) 0.001(3) 0.008(3) 0.000(3)
 N9 0.055(6) 0.019(5) 0.026(5) 0.005(4) 0.027(5) -0.001(4)
 N10 0.033(5) 0.028(5) 0.017(4) -0.003(4) 0.012(4) -0.007(4)
 N11 0.024(5) 0.032(5) 0.019(4) 0.003(4) 0.011(4) -0.003(4)
 N12 0.032(5) 0.027(5) 0.020(4) -0.003(4) 0.013(4) -0.007(4)
 C1 0.038(6) 0.021(5) 0.013(5) -0.003(4) 0.018(5) -0.002(4)
 C3 0.072(9) 0.023(6) 0.028(6) 0.005(5) 0.026(7) -0.001(6)
 C9 0.039(7) 0.022(6) 0.030(6) 0.009(5) 0.013(5) 0.003(5)
 C10 0.049(9) 0.059(10) 0.061(10) 0.010(8) 0.029(8) 0.012(7)
 C13 0.087(8) 0.049(7) 0.022(5) -0.008(5) 0.035(5) -0.018(6)
 C14 0.012(5) 0.038(7) 0.027(6) 0.014(5) 0.004(4) 0.006(4)
 C15 0.021(5) 0.040(7) 0.032(6) -0.003(5) 0.015(5) -0.001(5)
 C17 0.037(6) 0.031(6) 0.025(6) 0.004(5) 0.019(5) 0.001(5)
 C20 0.101(12) 0.027(7) 0.037(7) -0.006(5) 0.038(8) -0.020(7)
 C21 0.031(6) 0.025(6) 0.045(7) 0.005(5) 0.026(6) 0.005(5)
 C22 0.104(9) 0.051(7) 0.037(6) -0.019(5) 0.036(6) -0.016(6)
 C24 0.054(9) 0.040(8) 0.052(8) 0.002(7) 0.020(7) -0.003(7)
 C25 0.032(6) 0.032(6) 0.025(5) 0.004(5) 0.016(5) 0.000(5)
 N1S 0.059(8) 0.047(7) 0.062(8) 0.001(6) 0.041(7) 0.000(6)
 C1S 0.045(7) 0.036(7) 0.029(6) 0.005(5) 0.020(6) 0.005(6)
 C2S 0.057(9) 0.113(15) 0.049(9) 0.017(9) 0.036(8) -0.001(9)
 N2S 0.089(9) 0.043(7) 0.026(6) 0.000(5) 0.023(6) -0.001(6)
 C3S 0.057(8) 0.035(7) 0.038(7) 0.006(6) 0.028(7) 0.016(6)
 C4S 0.044(8) 0.064(9) 0.030(6) -0.012(6) 0.015(6) -0.005(7)

_geom_special_details
;
 All esds (except the esd in the dihedral angle between two l.s. planes)
 are estimated using the full covariance matrix.  The cell esds are taken
 into account individually in the estimation of esds in distances, angles
 and torsion angles; correlations between esds in cell parameters are only
 used when they are defined by crystal symmetry.  An approximate (isotropic)
 treatment of cell esds is used for estimating esds involving l.s. planes.
;
loop_
  _geom_bond_atom_site_label_1
  _geom_bond_atom_site_label_2
  _geom_bond_distance
  _geom_bond_site_symmetry_2
  _geom_bond_publ_flag
 Eu1 O1 2.378(7) . ?
 Eu1 O3 2.402(6) 3_877 ?
 Eu1 O4 2.376(7) . ?
 Eu1 O7 2.335(7) . ?
 Eu1 O10 2.383(7) . ?
 Eu1 N1 2.519(8) . ?
 Eu1 N3 2.537(8) . ?
 S1 O1 1.456(7) . ?
 S1 O2 1.429(7) . ?
 S1 O3 1.458(7) . ?
 S1 C2 1.828(13) . ?
 S2 O7 1.457(7) . ?
 S2 O8 1.407(8) . ?
 S2 O9 1.420(8) . ?
 S2 C12 1.832(13) . ?
 S3 O4 1.454(7) . ?
 S3 O5 1.435(8) . ?
 S3 O6 1.430(8) . ?
 S3 C18 1.819(13) . ?
 F4 C12 1.330(15) . ?
 F7 C18 1.330(15) . ?
 F8 C12 1.305(14) . ?
 F10 C12 1.349(16) . ?
 F12 C2 1.329(13) . ?
 F14 C2 1.304(13) . ?
 F15 C2 1.318(14) . ?
 F17 C18 1.331(14) . ?
 F18 C18 1.313(15) . ?
 O3 Eu1 2.402(6) 3_877 ?
 O10 H10A 0.8748 . ?
 O10 H10B 0.8753 . ?
 N1 N2 1.355(11) . ?
 N1 C4 1.324(14) . ?
 N2 C8 1.343(13) . ?
 N2 C23 1.440(13) . ?
 N3 N4 1.369(11) . ?
 N3 C19 1.334(14) . ?
 N4 C11 1.332(13) . ?
 N4 C23 1.452(13) . ?
 N5 N6 1.354(11) . ?
 N5 C6 1.325(14) . ?
 N6 C5 1.350(13) . ?
 N6 C23 1.442(13) . ?
 C4 H4 0.9500 . ?
 C4 C16 1.401(15) . ?
 C5 H5 0.9500 . ?
 C5 C26 1.358(15) . ?
 C6 H6 0.9500 . ?
 C6 C26 1.409(15) . ?
 C7 H7 0.9500 . ?
 C7 C11 1.366(16) . ?
 C7 C19 1.419(15) . ?
 C8 H8 0.9500 . ?
 C8 C16 1.367(16) . ?
 C11 H11 0.9500 . ?
 C16 H16 0.9500 . ?
 C19 H19 0.9500 . ?
 C23 H23 1.0000 . ?
 C26 H26 0.9500 . ?
 Eu2 O11 2.334(7) . ?
 Eu2 O14 2.375(7) . ?
 Eu2 O17 2.396(7) . ?
 Eu2 O19 2.415(7) 3_777 ?
 Eu2 O20 2.359(8) . ?
 Eu2 N7 2.535(8) . ?
 Eu2 N11 2.542(9) . ?
 S4 O11 1.456(7) . ?
 S4 O12 1.435(8) . ?
 S4 O13 1.421(9) . ?
 S4 C3 1.808(12) . ?
 S5 O14 1.455(7) . ?
 S5 O15 1.427(8) . ?
 S5 O16 1.435(9) . ?
 S5 C10 1.838(15) . ?
 S6 O17 1.445(8) . ?
 S6 O18 1.432(8) . ?
 S6 O19 1.435(7) . ?
 S6 C24 1.823(15) . ?
 F1 C3 1.320(16) . ?
 F2 C3 1.359(13) . ?
 F3 C3 1.316(14) . ?
 F5 C10 1.303(18) . ?
 F6 C10 1.326(16) . ?
 F9 C24 1.307(16) . ?
 F11 C24 1.325(16) . ?
 F13 C10 1.309(17) . ?
 F16 C24 1.328(15) . ?
 O19 Eu2 2.415(7) 3_777 ?
 O20 H20A 0.8705 . ?
 O20 H20B 0.8699 . ?
 N7 N8 1.368(11) . ?
 N7 C17 1.322(14) . ?
 N8 C1 1.426(13) . ?
 N8 C25 1.353(13) . ?
 N9 N10 1.361(12) . ?
 N9 C20 1.315(15) . ?
 N10 C1 1.446(13) . ?
 N10 C13 1.368(14) . ?
 N11 N12 1.369(11) . ?
 N11 C21 1.341(13) . ?
 N12 C1 1.450(13) . ?
 N12 C9 1.355(14) . ?
 C1 H1 1.0000 . ?
 C9 H9 0.9500 . ?
 C9 C14 1.358(16) . ?
 C13 H13 0.9500 . ?
 C13 C22 1.352(19) . ?
 C14 H14 0.9500 . ?
 C14 C21 1.400(15) . ?
 C15 H15 0.9500 . ?
 C15 C17 1.399(15) . ?
 C15 C25 1.388(15) . ?
 C17 H17 0.9500 . ?
 C20 H20 0.9500 . ?
 C20 C22 1.401(18) . ?
 C21 H21 0.9500 . ?
 C22 H22 0.9500 . ?
 C25 H25 0.9500 . ?
 O1S C5S 1.51(4) . ?
 O1S C7S 1.42(4) . ?
 C5S H5SA 0.9900 . ?
 C5S H5SB 0.9900 . ?
 C5S C6S 1.11(5) . ?
 C6S H6SA 0.9800 . ?
 C6S H6SB 0.9800 . ?
 C6S H6SC 0.9800 . ?
 C7S H7SA 0.9900 . ?
 C7S H7SB 0.9900 . ?
 C7S C8S 1.41(5) . ?
 C8S H8SA 0.9800 . ?
 C8S H8SB 0.9800 . ?
 C8S H8SC 0.9800 . ?
 N1S C1S 1.102(15) . ?
 C1S C2S 1.460(17) . ?
 C2S H2SA 0.9800 . ?
 C2S H2SB 0.9800 . ?
 C2S H2SC 0.9800 . ?
 N2S C3S 1.130(16) . ?
 C3S C4S 1.464(17) . ?
 C4S H4SA 0.9800 . ?
 C4S H4SB 0.9800 . ?
 C4S H4SC 0.9800 . ?

loop_
  _geom_angle_atom_site_label_1
  _geom_angle_atom_site_label_2
  _geom_angle_atom_site_label_3
  _geom_angle
  _geom_angle_site_symmetry_1
  _geom_angle_site_symmetry_3
  _geom_angle_publ_flag
 O1 Eu1 O3 75.9(2) . 3_877 ?
 O1 Eu1 O10 80.1(3) . . ?
 O1 Eu1 N1 138.7(3) . . ?
 O1 Eu1 N3 74.4(3) . . ?
 O3 Eu1 N1 119.6(3) 3_877 . ?
 O3 Eu1 N3 140.2(3) 3_877 . ?
 O4 Eu1 O1 75.8(3) . . ?
 O4 Eu1 O3 82.2(2) . 3_877 ?
 O4 Eu1 O10 147.2(3) . . ?
 O4 Eu1 N1 140.1(3) . . ?
 O4 Eu1 N3 114.8(3) . . ?
 O7 Eu1 O1 145.1(2) . . ?
 O7 Eu1 O3 75.5(2) . 3_877 ?
 O7 Eu1 O4 80.8(3) . . ?
 O7 Eu1 O10 108.5(3) . . ?
 O7 Eu1 N1 74.1(3) . . ?
 O7 Eu1 N3 139.9(3) . . ?
 O10 Eu1 O3 70.6(2) . 3_877 ?
 O10 Eu1 N1 71.6(3) . . ?
 O10 Eu1 N3 78.8(3) . . ?
 N1 Eu1 N3 71.1(3) . . ?
 O1 S1 O3 112.3(4) . . ?
 O1 S1 C2 101.9(5) . . ?
 O2 S1 O1 114.8(4) . . ?
 O2 S1 O3 116.8(5) . . ?
 O2 S1 C2 104.6(5) . . ?
 O3 S1 C2 104.2(5) . . ?
 O7 S2 C12 102.2(5) . . ?
 O8 S2 O7 114.2(5) . . ?
 O8 S2 O9 116.4(5) . . ?
 O8 S2 C12 103.8(6) . . ?
 O9 S2 O7 113.4(5) . . ?
 O9 S2 C12 104.7(6) . . ?
 O4 S3 C18 102.0(5) . . ?
 O5 S3 O4 114.8(5) . . ?
 O5 S3 C18 104.3(6) . . ?
 O6 S3 O4 114.4(5) . . ?
 O6 S3 O5 115.9(5) . . ?
 O6 S3 C18 102.9(5) . . ?
 S1 O1 Eu1 155.8(4) . . ?
 S1 O3 Eu1 166.6(5) . 3_877 ?
 S3 O4 Eu1 142.7(4) . . ?
 S2 O7 Eu1 168.9(5) . . ?
 Eu1 O10 H10A 132.7 . . ?
 Eu1 O10 H10B 114.1 . . ?
 H10A O10 H10B 103.8 . . ?
 N2 N1 Eu1 126.3(6) . . ?
 C4 N1 Eu1 128.9(6) . . ?
 C4 N1 N2 104.6(8) . . ?
 N1 N2 C23 119.6(8) . . ?
 C8 N2 N1 111.7(9) . . ?
 C8 N2 C23 128.3(9) . . ?
 N4 N3 Eu1 124.5(6) . . ?
 C19 N3 Eu1 130.8(7) . . ?
 C19 N3 N4 104.3(8) . . ?
 N3 N4 C23 120.9(8) . . ?
 C11 N4 N3 112.0(9) . . ?
 C11 N4 C23 127.1(9) . . ?
 N6 N5 Eu1 124.3(6) . . ?
 C6 N5 Eu1 130.2(7) . . ?
 C6 N5 N6 104.2(8) . . ?
 N5 N6 C23 121.1(8) . . ?
 C5 N6 N5 112.2(8) . . ?
 C5 N6 C23 126.5(9) . . ?
 F12 C2 S1 109.7(8) . . ?
 F14 C2 S1 111.0(8) . . ?
 F14 C2 F12 109.0(10) . . ?
 F14 C2 F15 109.6(11) . . ?
 F15 C2 S1 110.4(8) . . ?
 F15 C2 F12 107.2(10) . . ?
 N1 C4 H4 124.1 . . ?
 N1 C4 C16 111.7(10) . . ?
 C16 C4 H4 124.1 . . ?
 N6 C5 H5 126.4 . . ?
 N6 C5 C26 107.1(10) . . ?
 C26 C5 H5 126.4 . . ?
 N5 C6 H6 124.2 . . ?
 N5 C6 C26 111.7(10) . . ?
 C26 C6 H6 124.2 . . ?
 C11 C7 H7 127.8 . . ?
 C11 C7 C19 104.3(10) . . ?
 C19 C7 H7 127.8 . . ?
 N2 C8 H8 126.3 . . ?
 N2 C8 C16 107.4(10) . . ?
 C16 C8 H8 126.3 . . ?
 N4 C11 C7 108.1(9) . . ?
 N4 C11 H11 125.9 . . ?
 C7 C11 H11 125.9 . . ?
 F4 C12 S2 110.9(9) . . ?
 F4 C12 F10 107.9(11) . . ?
 F8 C12 S2 109.6(9) . . ?
 F8 C12 F4 109.3(11) . . ?
 F8 C12 F10 109.5(11) . . ?
 F10 C12 S2 109.6(9) . . ?
 C4 C16 H16 127.8 . . ?
 C8 C16 C4 104.4(10) . . ?
 C8 C16 H16 127.8 . . ?
 F7 C18 S3 110.7(9) . . ?
 F7 C18 F17 106.7(11) . . ?
 F17 C18 S3 110.1(9) . . ?
 F18 C18 S3 111.6(9) . . ?
 F18 C18 F7 108.0(11) . . ?
 F18 C18 F17 109.5(11) . . ?
 N3 C19 C7 111.1(10) . . ?
 N3 C19 H19 124.4 . . ?
 C7 C19 H19 124.4 . . ?
 N2 C23 N4 111.9(8) . . ?
 N2 C23 N6 112.2(8) . . ?
 N2 C23 H23 107.7 . . ?
 N4 C23 H23 107.7 . . ?
 N6 C23 N4 109.6(8) . . ?
 N6 C23 H23 107.7 . . ?
 C5 C26 C6 104.7(10) . . ?
 C5 C26 H26 127.6 . . ?
 C6 C26 H26 127.6 . . ?
 O11 Eu2 O14 81.0(3) . . ?
 O11 Eu2 O17 146.6(2) . . ?
 O11 Eu2 O19 74.6(2) . 3_777 ?
 O11 Eu2 O20 106.6(3) . . ?
 O11 Eu2 N7 74.3(3) . . ?
 O11 Eu2 N11 81.4(3) . . ?
 O14 Eu2 O17 76.8(3) . . ?
 O14 Eu2 O19 81.3(3) . 3_777 ?
 O14 Eu2 N7 139.7(3) . . ?
 O14 Eu2 N11 74.3(3) . . ?
 O17 Eu2 O19 77.6(2) . 3_777 ?
 O17 Eu2 N7 137.3(3) . . ?
 O17 Eu2 N11 115.4(3) . . ?
 O19 Eu2 N7 120.7(3) 3_777 . ?
 O19 Eu2 N11 148.0(3) 3_777 . ?
 O20 Eu2 O14 148.3(3) . . ?
 O20 Eu2 O17 81.4(3) . . ?
 O20 Eu2 O19 71.7(3) . 3_777 ?
 O20 Eu2 N7 70.7(3) . . ?
 O20 Eu2 N11 136.7(3) . . ?
 N7 Eu2 N11 70.9(3) . . ?
 O11 S4 C3 102.8(5) . . ?
 O12 S4 O11 113.0(5) . . ?
 O12 S4 C3 104.4(5) . . ?
 O13 S4 O11 114.4(5) . . ?
 O13 S4 O12 116.3(5) . . ?
 O13 S4 C3 103.8(6) . . ?
 O14 S5 C10 101.8(6) . . ?
 O15 S5 O14 114.4(5) . . ?
 O15 S5 O16 117.0(6) . . ?
 O15 S5 C10 104.3(6) . . ?
 O16 S5 O14 111.9(5) . . ?
 O16 S5 C10 105.4(7) . . ?
 O17 S6 C24 102.7(6) . . ?
 O18 S6 O17 114.5(5) . . ?
 O18 S6 O19 116.4(5) . . ?
 O18 S6 C24 105.4(6) . . ?
 O19 S6 O17 112.5(4) . . ?
 O19 S6 C24 103.4(6) . . ?
 S4 O11 Eu2 170.6(5) . . ?
 S5 O14 Eu2 145.8(5) . . ?
 S6 O17 Eu2 152.9(5) . . ?
 S6 O19 Eu2 165.2(5) . 3_777 ?
 Eu2 O20 H20A 121.7 . . ?
 Eu2 O20 H20B 125.4 . . ?
 H20A O20 H20B 104.5 . . ?
 N8 N7 Eu2 125.6(6) . . ?
 C17 N7 Eu2 129.8(7) . . ?
 C17 N7 N8 104.4(8) . . ?
 N7 N8 C1 120.7(8) . . ?
 C25 N8 N7 111.6(8) . . ?
 C25 N8 C1 127.7(8) . . ?
 N10 N9 Eu2 123.9(6) . . ?
 C20 N9 Eu2 131.0(8) . . ?
 C20 N9 N10 105.1(9) . . ?
 N9 N10 C1 122.5(8) . . ?
 N9 N10 C13 111.7(9) . . ?
 C13 N10 C1 125.7(9) . . ?
 N12 N11 Eu2 124.9(6) . . ?
 C21 N11 Eu2 130.4(7) . . ?
 C21 N11 N12 104.3(9) . . ?
 N11 N12 C1 121.1(8) . . ?
 C9 N12 N11 111.6(9) . . ?
 C9 N12 C1 127.1(9) . . ?
 N8 C1 N10 111.6(8) . . ?
 N8 C1 N12 110.9(8) . . ?
 N8 C1 H1 108.0 . . ?
 N10 C1 N12 110.3(8) . . ?
 N10 C1 H1 108.0 . . ?
 N12 C1 H1 108.0 . . ?
 F1 C3 S4 111.7(9) . . ?
 F1 C3 F2 106.6(10) . . ?
 F2 C3 S4 111.3(9) . . ?
 F3 C3 S4 111.1(9) . . ?
 F3 C3 F1 108.2(11) . . ?
 F3 C3 F2 107.8(10) . . ?
 N12 C9 H9 126.4 . . ?
 N12 C9 C14 107.1(10) . . ?
 C14 C9 H9 126.4 . . ?
 F5 C10 S5 110.7(10) . . ?
 F5 C10 F6 109.2(14) . . ?
 F5 C10 F13 109.8(14) . . ?
 F6 C10 S5 109.5(10) . . ?
 F13 C10 S5 110.1(11) . . ?
 F13 C10 F6 107.5(12) . . ?
 N10 C13 H13 127.1 . . ?
 C22 C13 N10 105.8(11) . . ?
 C22 C13 H13 127.1 . . ?
 C9 C14 H14 127.1 . . ?
 C9 C14 C21 105.8(10) . . ?
 C21 C14 H14 127.1 . . ?
 C17 C15 H15 128.0 . . ?
 C25 C15 H15 128.0 . . ?
 C25 C15 C17 103.9(9) . . ?
 N7 C17 C15 112.8(9) . . ?
 N7 C17 H17 123.6 . . ?
 C15 C17 H17 123.6 . . ?
 N9 C20 H20 124.6 . . ?
 N9 C20 C22 110.9(12) . . ?
 C22 C20 H20 124.6 . . ?
 N11 C21 C14 111.1(10) . . ?
 N11 C21 H21 124.5 . . ?
 C14 C21 H21 124.5 . . ?
 C13 C22 C20 106.6(12) . . ?
 C13 C22 H22 126.7 . . ?
 C20 C22 H22 126.7 . . ?
 F9 C24 S6 113.1(10) . . ?
 F9 C24 F11 109.4(12) . . ?
 F9 C24 F16 108.8(12) . . ?
 F11 C24 S6 109.9(10) . . ?
 F11 C24 F16 106.1(12) . . ?
 F16 C24 S6 109.3(10) . . ?
 N8 C25 C15 107.2(9) . . ?
 N8 C25 H25 126.4 . . ?
 C15 C25 H25 126.4 . . ?
 C7S O1S C5S 115(3) . . ?
 O1S C5S H5SA 110.4 . . ?
 O1S C5S H5SB 110.4 . . ?
 H5SA C5S H5SB 108.6 . . ?
 C6S C5S O1S 106(4) . . ?
 C6S C5S H5SA 110.4 . . ?
 C6S C5S H5SB 110.4 . . ?
 C5S C6S H6SA 109.5 . . ?
 C5S C6S H6SB 109.5 . . ?
 C5S C6S H6SC 109.5 . . ?
 H6SA C6S H6SB 109.5 . . ?
 H6SA C6S H6SC 109.5 . . ?
 H6SB C6S H6SC 109.5 . . ?
 O1S C7S H7SA 109.1 . . ?
 O1S C7S H7SB 109.1 . . ?
 H7SA C7S H7SB 107.8 . . ?
 C8S C7S O1S 112(4) . . ?
 C8S C7S H7SA 109.1 . . ?
 C8S C7S H7SB 109.1 . . ?
 C7S C8S H8SA 109.5 . . ?
 C7S C8S H8SB 109.5 . . ?
 C7S C8S H8SC 109.5 . . ?
 H8SA C8S H8SB 109.5 . . ?
 H8SA C8S H8SC 109.5 . . ?
 H8SB C8S H8SC 109.5 . . ?
 N1S C1S C2S 177.7(15) . . ?
 C1S C2S H2SA 109.5 . . ?
 C1S C2S H2SB 109.5 . . ?
 C1S C2S H2SC 109.5 . . ?
 H2SA C2S H2SB 109.5 . . ?
 H2SA C2S H2SC 109.5 . . ?
 H2SB C2S H2SC 109.5 . . ?
 N2S C3S C4S 178.5(15) . . ?
 C3S C4S H4SA 109.5 . . ?
 C3S C4S H4SB 109.5 . . ?
 C3S C4S H4SC 109.5 . . ?
 H4SA C4S H4SB 109.5 . . ?
 H4SA C4S H4SC 109.5 . . ?
 H4SB C4S H4SC 109.5 . . ?

loop_
  _geom_torsion_atom_site_label_1
  _geom_torsion_atom_site_label_2
  _geom_torsion_atom_site_label_3
  _geom_torsion_atom_site_label_4
  _geom_torsion
  _geom_torsion_site_symmetry_1
  _geom_torsion_site_symmetry_2
  _geom_torsion_site_symmetry_3
  _geom_torsion_site_symmetry_4
  _geom_torsion_publ_flag
 Eu1 N1 N2 C8 -175.3(7) . . . . ?
 Eu1 N1 N2 C23 10.5(12) . . . . ?
 Eu1 N1 C4 C16 175.5(7) . . . . ?
 Eu1 N3 N4 C11 -172.9(7) . . . . ?
 Eu1 N3 N4 C23 6.7(13) . . . . ?
 Eu1 N3 C19 C7 171.0(8) . . . . ?
 Eu1 N5 N6 C5 -166.0(7) . . . . ?
 Eu1 N5 N6 C23 9.3(13) . . . . ?
 Eu1 N5 C6 C26 165.7(8) . . . . ?
 O1 S1 O3 Eu1 -150.8(19) . . . 3_877 ?
 O1 S1 C2 F12 179.3(8) . . . . ?
 O1 S1 C2 F14 -60.3(10) . . . . ?
 O1 S1 C2 F15 61.4(9) . . . . ?
 O2 S1 O1 Eu1 -89.7(11) . . . . ?
 O2 S1 O3 Eu1 -15(2) . . . 3_877 ?
 O2 S1 C2 F12 59.4(9) . . . . ?
 O2 S1 C2 F14 179.8(9) . . . . ?
 O2 S1 C2 F15 -58.5(9) . . . . ?
 O3 S1 O1 Eu1 46.8(12) . . . . ?
 O3 S1 C2 F12 -63.7(9) . . . . ?
 O3 S1 C2 F14 56.7(10) . . . . ?
 O3 S1 C2 F15 178.4(8) . . . . ?
 O4 S3 C18 F7 -59.5(10) . . . . ?
 O4 S3 C18 F17 -177.3(9) . . . . ?
 O4 S3 C18 F18 60.8(10) . . . . ?
 O5 S3 O4 Eu1 77.2(9) . . . . ?
 O5 S3 C18 F7 60.3(10) . . . . ?
 O5 S3 C18 F17 -57.4(10) . . . . ?
 O5 S3 C18 F18 -179.3(9) . . . . ?
 O6 S3 O4 Eu1 -60.4(9) . . . . ?
 O6 S3 C18 F7 -178.3(9) . . . . ?
 O6 S3 C18 F17 64.0(10) . . . . ?
 O6 S3 C18 F18 -57.9(10) . . . . ?
 O7 S2 C12 F4 -55.8(11) . . . . ?
 O7 S2 C12 F8 -176.5(9) . . . . ?
 O7 S2 C12 F10 63.3(9) . . . . ?
 O8 S2 O7 Eu1 1(3) . . . . ?
 O8 S2 C12 F4 63.2(11) . . . . ?
 O8 S2 C12 F8 -57.6(11) . . . . ?
 O8 S2 C12 F10 -177.7(8) . . . . ?
 O9 S2 O7 Eu1 -135(2) . . . . ?
 O9 S2 C12 F4 -174.3(9) . . . . ?
 O9 S2 C12 F8 64.9(11) . . . . ?
 O9 S2 C12 F10 -55.2(10) . . . . ?
 N1 N2 C8 C16 -0.4(12) . . . . ?
 N1 N2 C23 N4 -68.0(11) . . . . ?
 N1 N2 C23 N6 55.6(12) . . . . ?
 N1 C4 C16 C8 -0.5(13) . . . . ?
 N2 N1 C4 C16 0.2(12) . . . . ?
 N2 C8 C16 C4 0.5(12) . . . . ?
 N3 N4 C11 C7 0.8(14) . . . . ?
 N3 N4 C23 N2 57.8(12) . . . . ?
 N3 N4 C23 N6 -67.3(12) . . . . ?
 N4 N3 C19 C7 -1.9(13) . . . . ?
 N5 N6 C5 C26 -2.1(13) . . . . ?
 N5 N6 C23 N2 -67.3(12) . . . . ?
 N5 N6 C23 N4 57.6(12) . . . . ?
 N5 C6 C26 C5 0.3(15) . . . . ?
 N6 N5 C6 C26 -1.5(13) . . . . ?
 N6 C5 C26 C6 1.0(14) . . . . ?
 C2 S1 O1 Eu1 157.8(11) . . . . ?
 C2 S1 O3 Eu1 100(2) . . . 3_877 ?
 C4 N1 N2 C8 0.1(11) . . . . ?
 C4 N1 N2 C23 -174.0(9) . . . . ?
 C5 N6 C23 N2 107.3(11) . . . . ?
 C5 N6 C23 N4 -127.8(11) . . . . ?
 C6 N5 N6 C5 2.3(12) . . . . ?
 C6 N5 N6 C23 177.5(10) . . . . ?
 C8 N2 C23 N4 119.0(11) . . . . ?
 C8 N2 C23 N6 -117.4(11) . . . . ?
 C11 N4 C23 N2 -122.7(11) . . . . ?
 C11 N4 C23 N6 112.2(11) . . . . ?
 C11 C7 C19 N3 2.4(15) . . . . ?
 C12 S2 O7 Eu1 113(2) . . . . ?
 C18 S3 O4 Eu1 -170.7(8) . . . . ?
 C19 N3 N4 C11 0.7(12) . . . . ?
 C19 N3 N4 C23 -179.7(10) . . . . ?
 C19 C7 C11 N4 -1.9(14) . . . . ?
 C23 N2 C8 C16 173.1(10) . . . . ?
 C23 N4 C11 C7 -178.7(11) . . . . ?
 C23 N6 C5 C26 -177.1(11) . . . . ?
 Eu2 N7 N8 C1 1.7(12) . . . . ?
 Eu2 N7 N8 C25 -177.0(7) . . . . ?
 Eu2 N7 C17 C15 176.9(7) . . . . ?
 Eu2 N9 N10 C1 -2.5(14) . . . . ?
 Eu2 N9 N10 C13 -178.5(9) . . . . ?
 Eu2 N9 C20 C22 178.1(10) . . . . ?
 Eu2 N11 N12 C1 -4.1(12) . . . . ?
 Eu2 N11 N12 C9 170.7(7) . . . . ?
 Eu2 N11 C21 C14 -171.3(7) . . . . ?
 O11 S4 C3 F1 -63.2(9) . . . . ?
 O11 S4 C3 F2 55.8(11) . . . . ?
 O11 S4 C3 F3 175.9(9) . . . . ?
 O12 S4 C3 F1 55.0(10) . . . . ?
 O12 S4 C3 F2 174.0(9) . . . . ?
 O12 S4 C3 F3 -65.9(11) . . . . ?
 O13 S4 C3 F1 177.4(8) . . . . ?
 O13 S4 C3 F2 -63.7(10) . . . . ?
 O13 S4 C3 F3 56.5(11) . . . . ?
 O14 S5 C10 F5 -62.2(12) . . . . ?
 O14 S5 C10 F6 177.4(10) . . . . ?
 O14 S5 C10 F13 59.4(12) . . . . ?
 O15 S5 O14 Eu2 56.4(10) . . . . ?
 O15 S5 C10 F5 57.1(12) . . . . ?
 O15 S5 C10 F6 -63.3(12) . . . . ?
 O15 S5 C10 F13 178.7(10) . . . . ?
 O16 S5 O14 Eu2 -79.7(10) . . . . ?
 O16 S5 C10 F5 -179.1(11) . . . . ?
 O16 S5 C10 F6 60.4(12) . . . . ?
 O16 S5 C10 F13 -57.6(12) . . . . ?
 O17 S6 O19 Eu2 158.2(18) . . . 3_777 ?
 O17 S6 C24 F9 61.1(11) . . . . ?
 O17 S6 C24 F11 -61.6(11) . . . . ?
 O17 S6 C24 F16 -177.6(9) . . . . ?
 O18 S6 O17 Eu2 96.5(11) . . . . ?
 O18 S6 O19 Eu2 23(2) . . . 3_777 ?
 O18 S6 C24 F9 -178.8(10) . . . . ?
 O18 S6 C24 F11 58.6(11) . . . . ?
 O18 S6 C24 F16 -57.4(11) . . . . ?
 O19 S6 O17 Eu2 -39.3(12) . . . . ?
 O19 S6 C24 F9 -56.1(11) . . . . ?
 O19 S6 C24 F11 -178.8(9) . . . . ?
 O19 S6 C24 F16 65.2(11) . . . . ?
 N7 N8 C1 N10 60.2(11) . . . . ?
 N7 N8 C1 N12 -63.3(11) . . . . ?
 N7 N8 C25 C15 -0.2(12) . . . . ?
 N8 N7 C17 C15 0.0(12) . . . . ?
 N9 N10 C1 N8 -60.2(12) . . . . ?
 N9 N10 C1 N12 63.6(12) . . . . ?
 N9 N10 C13 C22 0.3(16) . . . . ?
 N9 C20 C22 C13 0(2) . . . . ?
 N10 N9 C20 C22 0.1(17) . . . . ?
 N10 C13 C22 C20 -0.3(18) . . . . ?
 N11 N12 C1 N8 64.9(11) . . . . ?
 N11 N12 C1 N10 -59.3(11) . . . . ?
 N11 N12 C9 C14 2.6(12) . . . . ?
 N12 N11 C21 C14 1.3(12) . . . . ?
 N12 C9 C14 C21 -1.7(12) . . . . ?
 C1 N8 C25 C15 -178.8(9) . . . . ?
 C1 N10 C13 C22 -175.5(12) . . . . ?
 C1 N12 C9 C14 176.9(9) . . . . ?
 C9 N12 C1 N8 -109.0(11) . . . . ?
 C9 N12 C1 N10 126.8(10) . . . . ?
 C9 C14 C21 N11 0.2(13) . . . . ?
 C10 S5 O14 Eu2 168.2(9) . . . . ?
 C13 N10 C1 N8 115.2(12) . . . . ?
 C13 N10 C1 N12 -121.0(12) . . . . ?
 C17 N7 N8 C1 178.8(9) . . . . ?
 C17 N7 N8 C25 0.1(11) . . . . ?
 C17 C15 C25 N8 0.2(12) . . . . ?
 C20 N9 N10 C1 175.7(11) . . . . ?
 C20 N9 N10 C13 -0.3(14) . . . . ?
 C21 N11 N12 C1 -177.1(9) . . . . ?
 C21 N11 N12 C9 -2.4(11) . . . . ?
 C24 S6 O17 Eu2 -149.8(10) . . . . ?
 C24 S6 O19 Eu2 -92(2) . . . 3_777 ?
 C25 N8 C1 N10 -121.4(11) . . . . ?
 C25 N8 C1 N12 115.2(11) . . . . ?
 C25 C15 C17 N7 -0.1(13) . . . . ?
 C5S O1S C7S C8S -173(3) . . . . ?
 C7S O1S C5S C6S -162(4) . . . . ?

_shelx_res_file
;
    ppr2.res created by SHELXL-2014/7

TITL ppr2_a.res in P2(1)/c
REM Old TITL PPR2 in P2(1)/c
REM SHELXT solution in P2(1)/c
REM R1 0.336, Rweak 0.025, Alpha 0.090, Orientation as input
REM Formula found by SHELXT: C70 O23 Eu2
CELL 0.71073 21.5956 17.9123 18.6682 90 115.419 90
ZERR 4 0.0029 0.0022 0.0021 0 0.004 0
LATT 1
SYMM -X,0.5+Y,0.5-Z
SFAC C H Eu F N O S
UNIT 131.59 148.97 8 72 56 82.9 24
ISOR 0.01 0.02 C13 C22 F4

L.S. 6
PLAN  12
SIZE 0.12 0.1 0.03
TEMP -123(2)
CONF
CONN 7 Eu1
CONN 7 Eu2
list 4
MORE -1
BOND $H
fmap 2
acta
OMIT 0 1 1
OMIT -3 1 5
OMIT -9 2 7
OMIT -3 2 7
OMIT -1 1 5
OMIT -9 3 5
OMIT -1 1 1
OMIT 8 4 16
OMIT 22 7 1
OMIT 1 1 1
REM <olex2.extras>
REM <HklSrc "%.\\PPR2.hkp">
REM </olex2.extras>

WGHT    0.045000   92.144699
BASF   0.10356
FVAR       3.22649   0.68230
EU1   3    1.497232    0.863839    1.098392    11.00000    0.02703    0.01891 =
         0.01516    0.00154    0.01247    0.00108
S1    7    1.434694    1.060829    1.046459    11.00000    0.03023    0.01981 =
         0.01711    0.00400    0.01476    0.00594
S2    7    1.578784    0.705952    1.035569    11.00000    0.03661    0.02377 =
         0.02289    0.00006    0.01948    0.00265
S3    7    1.379168    0.843729    0.889973    11.00000    0.02894    0.02345 =
         0.01737    0.00000    0.01164   -0.00007
F4    4    1.547057    0.622564    1.130262    11.00000    0.11769    0.04672 =
         0.03722    0.01272    0.05378   -0.00503
F7    4    1.271605    0.769275    0.878274    11.00000    0.05209    0.07342 =
         0.07733    0.00601    0.02619   -0.02459
F8    4    1.575459    0.562741    1.049093    11.00000    0.14438    0.02023 =
         0.09050    0.00912    0.08365    0.02020
F10   4    1.475680    0.615590    1.006140    11.00000    0.07159    0.05456 =
         0.06402   -0.02007    0.04303   -0.03090
F12   4    1.326688    1.143503    0.974970    11.00000    0.04443    0.03521 =
         0.07495    0.01397    0.01185    0.01554
F14   4    1.315124    1.030605    0.933131    11.00000    0.04618    0.06093 =
         0.05214   -0.01891    0.01103   -0.00381
F15   4    1.313722    1.055899    1.044626    11.00000    0.04463    0.09708 =
         0.06551    0.01157    0.03682    0.00811
F17   4    1.258186    0.828950    0.773587    11.00000    0.04313    0.12380 =
         0.02864   -0.01376    0.00307   -0.00721
F18   4    1.259183    0.887865    0.874999    11.00000    0.03763    0.08527 =
         0.06763   -0.02462    0.01848    0.00997
O1    6    1.441160    0.981627    1.065823    11.00000    0.03272    0.01912 =
         0.02693    0.00895    0.01856    0.01079
O2    6    1.456243    1.109736    1.113266    11.00000    0.04146    0.03518 =
         0.01989   -0.00837    0.01653   -0.00293
O3    6    1.458011    1.078802    0.985890    11.00000    0.04109    0.02793 =
         0.02359    0.00795    0.02534   -0.00017
O4    6    1.400954    0.842964    0.975257    11.00000    0.02328    0.04566 =
         0.00715    0.00752    0.00093    0.00300
O5    6    1.400542    0.780210    0.859400    11.00000    0.04593    0.03578 =
         0.04245   -0.00851    0.02359    0.00827
O6    6    1.385757    0.914661    0.858764    11.00000    0.04766    0.03217 =
         0.03630    0.00810    0.01839   -0.00685
O7    6    1.539696    0.764402    1.051880    11.00000    0.04395    0.01818 =
         0.02877   -0.00567    0.02670    0.00096
O8    6    1.648338    0.703230    1.089874    11.00000    0.03358    0.04736 =
         0.03947   -0.00431    0.01765    0.00359
O9    6    1.564403    0.700081    0.954084    11.00000    0.05213    0.03092 =
         0.02759    0.00181    0.02574    0.00637
AFIX   6
O10   6    1.590432    0.943599    1.175613    11.00000    0.04710    0.02641 =
         0.01836    0.00293    0.01643   -0.00863
H10A  2    1.599967    0.990037    1.169795    11.00000   -1.50000
H10B  2    1.604391    0.938909    1.226875    11.00000   -1.50000
AFIX   0
N1    5    1.576770    0.793191    1.219815    11.00000    0.02847    0.02594 =
         0.01610    0.00492    0.01273    0.00338
N2    5    1.561858    0.768085    1.279104    11.00000    0.03246    0.02705 =
         0.01047    0.00636    0.00760    0.00299
N3    5    1.468062    0.896010    1.212726    11.00000    0.04969    0.02466 =
         0.01648    0.00269    0.02347   -0.00089
N4    5    1.467865    0.845816    1.267911    11.00000    0.02926    0.02463 =
         0.01619    0.00393    0.01190   -0.00181
N5    5    1.432687    0.756561    1.126063    11.00000    0.02904    0.02137 =
         0.01759   -0.00180    0.01412   -0.00956
N6    5    1.446020    0.730743    1.199417    11.00000    0.02759    0.02894 =
         0.01980   -0.00394    0.01123   -0.01361
C2    1    1.341689    1.072556    0.996232    11.00000    0.04197    0.03174 =
         0.03644   -0.00561    0.01719    0.00379
C4    1    1.642487    0.777245    1.243446    11.00000    0.04227    0.02600 =
         0.02332    0.00250    0.02297   -0.00075
AFIX  43
H4    2    1.667732    0.788525    1.213830    11.00000   -1.20000
AFIX   0
C5    1    1.415993    0.664085    1.197039    11.00000    0.03706    0.02611 =
         0.02344   -0.00052    0.00950   -0.00956
AFIX  43
H5    2    1.419670    0.635162    1.241347    11.00000   -1.20000
AFIX   0
C6    1    1.391396    0.705655    1.077482    11.00000    0.04462    0.04363 =
         0.02363   -0.00126    0.02211   -0.00825
AFIX  43
H6    2    1.372137    0.708864    1.021279    11.00000   -1.20000
AFIX   0
C7    1    1.424981    0.947614    1.292938    11.00000    0.07794    0.02767 =
         0.02900   -0.00109    0.03905    0.00895
AFIX  43
H7    2    1.404708    0.982555    1.314763    11.00000   -1.20000
AFIX   0
C8    1    1.616846    0.737405    1.338206    11.00000    0.04528    0.01564 =
         0.03016    0.00064    0.01855    0.00018
AFIX  43
H8    2    1.618353    0.716541    1.385714    11.00000   -1.20000
AFIX   0
C11   1    1.443253    0.875437    1.315868    11.00000    0.05559    0.03243 =
         0.01830    0.00016    0.02572   -0.00065
AFIX  43
H11   2    1.439125    0.850661    1.358605    11.00000   -1.20000
AFIX   0
C12   1    1.542585    0.620988    1.056956    11.00000    0.06185    0.02153 =
         0.05377   -0.00019    0.03243   -0.00303
C16   1    1.670245    0.741714    1.317449    11.00000    0.04041    0.02724 =
         0.03226   -0.00232    0.01651   -0.00216
AFIX  43
H16   2    1.715885    0.724491    1.346638    11.00000   -1.20000
AFIX   0
C18   1    1.286783    0.832760    0.852400    11.00000    0.03998    0.04346 =
         0.03818    0.00550    0.01554   -0.00554
C19   1    1.443160    0.958566    1.229091    11.00000    0.04792    0.02928 =
         0.02267    0.00882    0.01957    0.00502
AFIX  43
H19   2    1.438236    1.004433    1.201619    11.00000   -1.20000
AFIX   0
C23   1    1.492076    0.769923    1.269563    11.00000    0.03743    0.01800 =
         0.02371    0.01003    0.02018    0.00827
AFIX  13
H23   2    1.490728    0.744266    1.316447    11.00000   -1.20000
AFIX   0
C26   1    1.379554    0.646178    1.119398    11.00000    0.05573    0.03089 =
         0.02779    0.00066    0.01216   -0.02104
AFIX  43
H26   2    1.352144    0.603082    1.098068    11.00000   -1.20000
AFIX   0

EU2   3    0.990431    0.868652    1.097581    11.00000    0.02870    0.01998 =
         0.01602    0.00196    0.01193   -0.00023
S4    7    0.898998    0.715030    0.951587    11.00000    0.04298    0.02513 =
         0.01949   -0.00034    0.01407   -0.00334
S5    7    1.111776    0.832877    1.011496    11.00000    0.03490    0.02561 =
         0.02562    0.00446    0.01850    0.00437
S6    7    1.068677    1.057836    1.113628    11.00000    0.03346    0.02358 =
         0.01597   -0.00055    0.01221   -0.00491
F1    4    0.995699    0.619300    1.027854    11.00000    0.07717    0.04899 =
         0.04099    0.01150    0.02496    0.02771
F2    4    0.925061    0.635577    1.079619    11.00000    0.09619    0.04521 =
         0.03829    0.01014    0.03921   -0.00443
F3    4    0.895396    0.572147    0.971428    11.00000    0.13515    0.02937 =
         0.04156   -0.00114    0.01502   -0.02384
F5    4    1.231091    0.871363    1.120982    11.00000    0.05424    0.11158 =
         0.09656   -0.02242    0.00855   -0.00833
F6    4    1.235148    0.807612    1.025967    11.00000    0.06108    0.11866 =
         0.10354    0.03980    0.06800    0.03911
F9    4    1.187526    1.017263    1.119234    11.00000    0.04483    0.06975 =
         0.09511   -0.01747    0.03443    0.00455
F11   4    1.189246    1.048084    1.231280    11.00000    0.05393    0.09890 =
         0.03836    0.02390   -0.00971   -0.00565
F13   4    1.211807    0.753951    1.112943    11.00000    0.06089    0.10481 =
         0.09070    0.06922    0.03776    0.04560
F16   4    1.180496    1.131981    1.147344    11.00000    0.04649    0.04690 =
         0.09590    0.00922    0.01674   -0.01522
O11   6    0.939890    0.773352    1.005494    11.00000    0.04017    0.02694 =
         0.01854   -0.00420    0.00960   -0.00823
O12   6    0.914758    0.704846    0.884983    11.00000    0.06762    0.04075 =
         0.01392   -0.00078    0.02224    0.00059
O13   6    0.828329    0.716694    0.934826    11.00000    0.04070    0.05576 =
         0.03523    0.00367    0.00704   -0.01081
O14   6    1.085398    0.836769    1.071198    11.00000    0.03381    0.03831 =
         0.02630    0.00838    0.02018    0.00536
O15   6    1.109912    0.902007    0.972609    11.00000    0.05967    0.02941 =
         0.05800    0.01977    0.04119    0.01228
O16   6    1.087350    0.768009    0.962163    11.00000    0.05989    0.03743 =
         0.05198   -0.01879    0.02307   -0.00194
O17   6    1.056866    0.981148    1.128444    11.00000    0.04308    0.02760 =
         0.02184    0.00005    0.01607   -0.01068
O18   6    1.049775    1.111737    1.157339    11.00000    0.05028    0.02401 =
         0.03474   -0.00761    0.01967   -0.00233
O19   6    1.046938    1.073022    1.030862    11.00000    0.04393    0.03020 =
         0.01442    0.00249    0.01408   -0.00382
AFIX   6
O20   6    0.902376    0.954170    1.081593    11.00000    0.05178    0.03088 =
         0.03329    0.01881    0.03046    0.01051
H20A  2    0.897054    0.995473    1.055012    11.00000   -1.50000
H20B  2    0.887904    0.964664    1.117319    11.00000   -1.50000
AFIX   0
N7    5    0.904783    0.806752    1.138149    11.00000    0.02816    0.02499 =
         0.01670    0.00535    0.01138    0.00241
N8    5    0.919715    0.774865    1.210269    11.00000    0.01696    0.02951 =
         0.01107    0.00133    0.00821    0.00038
N9    5    1.017896    0.900730    1.240946    11.00000    0.05516    0.01911 =
         0.02589    0.00482    0.02663   -0.00116
N10   5    1.012572    0.851450    1.293485    11.00000    0.03336    0.02811 =
         0.01705   -0.00278    0.01197   -0.00713
N11   5    1.047251    0.757709    1.186461    11.00000    0.02408    0.03223 =
         0.01899    0.00260    0.01114   -0.00281
N12   5    1.034015    0.734471    1.248347    11.00000    0.03216    0.02681 =
         0.01994   -0.00330    0.01275   -0.00732
C1    1    0.987940    0.775967    1.271623    11.00000    0.03834    0.02095 =
         0.01327   -0.00251    0.01837   -0.00215
AFIX  13
H1    2    0.987530    0.751074    1.319365    11.00000   -1.20000
AFIX   0
C3    1    0.930333    0.631053    1.009794    11.00000    0.07200    0.02319 =
         0.02846    0.00462    0.02585   -0.00062
C9    1    1.063846    0.667774    1.277251    11.00000    0.03878    0.02168 =
         0.03044    0.00919    0.01254    0.00262
AFIX  43
H9    2    1.060200    0.640049    1.318655    11.00000   -1.20000
AFIX   0
C10   1    1.203480    0.815849    1.072589    11.00000    0.04930    0.05914 =
         0.06088    0.00967    0.02873    0.01211
C13   1    1.028798    0.883906    1.365644    11.00000    0.08656    0.04920 =
         0.02171   -0.00766    0.03504   -0.01752
AFIX  43
H13   2    1.029057    0.860783    1.411568    11.00000   -1.20000
AFIX   0
C14   1    1.099948    0.647972    1.235934    11.00000    0.01177    0.03810 =
         0.02734    0.01369    0.00388    0.00567
AFIX  43
H14   2    1.127325    0.604575    1.243397    11.00000   -1.20000
AFIX   0
C15   1    0.809248    0.754926    1.138810    11.00000    0.02120    0.03957 =
         0.03249   -0.00291    0.01465   -0.00080
AFIX  43
H15   2    0.762891    0.739724    1.121351    11.00000   -1.20000
AFIX   0
C17   1    0.838534    0.794254    1.096283    11.00000    0.03681    0.03089 =
         0.02497    0.00424    0.01934    0.00130
AFIX  43
H17   2    0.813482    0.810270    1.042998    11.00000   -1.20000
AFIX   0
C20   1    1.037138    0.963877    1.280233    11.00000    0.10115    0.02718 =
         0.03715   -0.00574    0.03765   -0.01982
AFIX  43
H20   2    1.045058    1.008991    1.258721    11.00000   -1.20000
AFIX   0
C21   1    1.088490    0.704718    1.180074    11.00000    0.03075    0.02455 =
         0.04454    0.00498    0.02561    0.00459
AFIX  43
H21   2    1.107421    0.705579    1.142594    11.00000   -1.20000
AFIX   0
C22   1    1.044396    0.955697    1.358113    11.00000    0.10382    0.05082 =
         0.03740   -0.01872    0.03601   -0.01561
AFIX  43
H22   2    1.057680    0.993260    1.397845    11.00000   -1.20000
AFIX   0
C24   1    1.161866    1.062665    1.154257    11.00000    0.05354    0.03956 =
         0.05177    0.00211    0.02046   -0.00278
C25   1    0.863640    0.743280    1.212416    11.00000    0.03183    0.03159 =
         0.02454    0.00416    0.01613   -0.00015
AFIX  43
H25   2    0.861832    0.717870    1.256146    11.00000   -1.20000
AFIX   0

PART 1
O1S   6    1.240793    0.927684    1.462155    21.00000    0.10054
C5S   1    1.237740    0.906158    1.382579    21.00000    0.12012
AFIX  23
H5SA  2    1.238516    0.851165    1.377728    21.00000   -1.20000
H5SB  2    1.195232    0.925496    1.339212    21.00000   -1.20000
AFIX   0
C6S   1    1.283504    0.931337    1.379495    21.00000    0.16854
AFIX  33
H6SA  2    1.283754    0.918798    1.328521    21.00000   -1.50000
H6SB  2    1.282044    0.985702    1.384457    21.00000   -1.50000
H6SC  2    1.325115    0.911738    1.422783    21.00000   -1.50000
AFIX   0
C7S   1    1.198754    0.883806    1.486959    21.00000    0.14344
AFIX  23
H7SA  2    1.151457    0.883087    1.444242    21.00000   -1.20000
H7SB  2    1.216007    0.831828    1.495814    21.00000   -1.20000
AFIX   0
C8S   1    1.197419    0.911194    1.557331    21.00000    0.12170
AFIX  33
H8SA  2    1.167883    0.879250    1.572060    21.00000   -1.50000
H8SB  2    1.244000    0.911027    1.600137    21.00000   -1.50000
H8SC  2    1.179449    0.962286    1.548565    21.00000   -1.50000
AFIX   0

PART 0
N1S   5    0.852848    0.956696    1.199613    11.00000    0.05921    0.04730 =
         0.06214    0.00101    0.04115    0.00032
C1S   1    0.819966    0.942681    1.229371    11.00000    0.04467    0.03585 =
         0.02877    0.00466    0.01967    0.00458
C2S   1    0.778485    0.925339    1.271724    11.00000    0.05675    0.11307 =
         0.04917    0.01670    0.03630   -0.00069
AFIX 137
H2SA  2    0.731571    0.913537    1.233432    11.00000   -1.50000
H2SB  2    0.777824    0.968526    1.303617    11.00000   -1.50000
H2SC  2    0.798221    0.882313    1.306550    11.00000   -1.50000
AFIX   0

N2S   5    0.646351    0.555170    0.841319    11.00000    0.08926    0.04284 =
         0.02638   -0.00027    0.02338   -0.00083
C3S   1    0.678594    0.577343    0.902897    11.00000    0.05721    0.03458 =
         0.03790    0.00638    0.02760    0.01583
C4S   1    0.719028    0.605363    0.983315    11.00000    0.04421    0.06400 =
         0.02966   -0.01192    0.01489   -0.00453
AFIX 137
H4SA  2    0.751330    0.643288    0.982250    11.00000   -1.50000
H4SB  2    0.744482    0.564022    1.017747    11.00000   -1.50000
H4SC  2    0.688340    0.627539    1.003784    11.00000   -1.50000
AFIX   0
HKLF 5

REM  ppr2_a.res in P2(1)/c
REM R1 =  0.0612 for    8725 Fo > 4sig(Fo)  and  0.0943 for all   12125 data
REM    841 parameters refined using     18 restraints

END

WGHT      0.0456     91.6266

REM Highest difference peak  1.530,  deepest hole -2.087,  1-sigma level  0.169
Q1    1   0.9972  0.6193  1.0972  11.00000  0.05    1.53
Q2    1   1.4922  0.6427  1.0953  11.00000  0.05    1.43
Q3    1   1.5514  0.8596  1.1229  11.00000  0.05    1.14
Q4    1   1.0482  0.8848  1.1307  11.00000  0.05    1.00
Q5    1   0.9295  0.8679  1.0715  11.00000  0.05    0.97
Q6    1   1.2217  0.8692  1.2811  11.00000  0.05    0.86
Q7    1   1.4799  0.9307  1.0670  11.00000  0.05    0.85
Q8    1   1.4521  0.8940  1.1178  11.00000  0.05    0.84
Q9    1   0.9281  0.8698  1.0271  11.00000  0.05    0.79
Q10   1   1.4948  0.6207  1.2159  11.00000  0.05    0.79
Q11   1   1.4373  0.8752  1.0313  11.00000  0.05    0.77
Q12   1   1.4569  0.8319  1.1339  11.00000  0.05    0.75
;
_shelx_res_checksum                68169
_shelx_hkl_file
;
   3   0   0   48913    1912  -2
   3   0   0   48913    1912   1
   4   0   0  870874   12399  -2
   4   0   0  870874   12399   1
   5   0   0   70363    3113  -2
   5   0   0   70363    3113   1
   6   0   0   39766    2634  -2
   6   0   0   39766    2634   1
   7   0   0   17935    2231  -2
   7   0   0   17935    2231   1
   8   0   0   23992    2629  -2
   8   0   0   23992    2629   1
   9   0   0  132904    6749  -2
   9   0   0  132904    6749   1
  10   0   0  898414   15146  -2
  10   0   0  898414   15146   1
  11   0   0  164687    5939  -2
  11   0   0  164687    5939   1
  12   0   0  990140   16979  -2
  12   0   0  990140   16979   1
  13   0   0   20524    3668  -2
  13   0   0   20524    3668   1
  14   0   0  235558    7625  -2
  14   0   0  235558    7625   1
  15   0   0   55557    5525  -2
  15   0   0   55557    5525   1
  16   0   0  531435   12417   1
  17   0   0   50124    4946   1
  18   0   0  340277   19207   1
  19   0   0   12417    4112   1
  20   0   0   82924    6353   1
  21   0   0   -2850    7515   1
  22   0   0   24038    6217   1
  23   0   0   24430   11012   1
   1  -1   0    -118     288  -2
   1   1   0    -118     288   1
   2  -1   0   38782    1520  -2
   2   1   0   38782    1520   1
   3  -1   0  588196    6070  -2
   3   1   0  588196    6070   1
   4  -1   0   30036    1408  -2
   4   1   0   30036    1408   1
   5  -1   0  205692    3572  -2
   5   1   0  205692    3572   1
   6  -1   0   31895    1773  -2
   6   1   0   31895    1773   1
   7  -1   0  972262   10536  -2
   7   1   0  972262   10536   1
   8  -1   0    4238    1375  -2
   8   1   0    4238    1375   1
   9  -1   0  123575    3979  -2
   9   1   0  123575    3979   1
  10  -1   0  117611    4426  -2
  10   1   0  117611    4426   1
  11  -1   0  253700    7228  -2
  11   1   0  253700    7228   1
  12  -1   0  249486    5220  -2
  12   1   0  249486    5220   1
  13  -1   0   14091    2123  -2
  13   1   0   14091    2123   1
  14  -1   0  107437    4227  -2
  14   1   0  107437    4227   1
  15  -1   0   55064    3306  -2
  15   1   0   55064    3306   1
  16   1   0   45489    3261   1
  17   1   0   43698    3422   1
  18   1   0  128067    7919   1
  19   1   0   12004    3141   1
  20   1   0   79274    6073   1
  21   1   0    2070    2668   1
  22   1   0   89346    9424   1
  23   1   0    7058    3641   1
   1  -2   0    2290     536  -2
   1   2   0    2290     536   1
   2  -2   0  221081    2874  -2
   2   2   0  221081    2874   1
   3  -2   0   16538    1039  -2
   3   2   0   16538    1039   1
   4  -2   0   45387    1703  -2
   4   2   0   45387    1703   1
   5  -2   0    5238    1164  -2
   5   2   0    5238    1164   1
   6  -2   0  163862    3323  -2
   6   2   0  163862    3323   1
   7  -2   0   43534    2065  -2
   7   2   0   43534    2065   1
   8  -2   0  263880    4603  -2
   8   2   0  263880    4603   1
   9  -2   0   -1405    1405  -2
   9   2   0   -1405    1405   1
  10  -2   0   95287    3555  -2
  10   2   0   95287    3555   1
  11  -2   0   36439    2492  -2
  11   2   0   36439    2492   1
  12  -2   0   48773    2811  -2
  12   2   0   48773    2811   1
  13  -2   0   12438    2076  -2
  13   2   0   12438    2076   1
  14  -2   0    7963    2031  -2
  14   2   0    7963    2031   1
  15  -2   0   14820    2376  -2
  15   2   0   14820    2376   1
  16   2   0   20397    3151   1
  17   2   0    6186    3247   1
  18   2   0    -213    2784   1
  19   2   0   -1352    2316   1
  20   2   0    2114    2647   1
  21   2   0    5331    2832   1
  22   2   0    3562    2812   1
  23   2   0    2363    4466   1
   1  -3   0   75871    1879  -2
   1   3   0   75871    1879   1
   2  -3   0   12164    1171  -2
   2   3   0   12164    1171   1
   3  -3   0    6948    1105  -2
   3   3   0    6948    1105   1
   4  -3   0   98023    2434  -2
   4   3   0   98023    2434   1
   5  -3   0  102424    2812  -2
   5   3   0  102424    2812   1
   6  -3   0   28791    3298  -2
   6   3   0   28791    3298   1
   7  -3   0  348197    5244  -2
   7   3   0  348197    5244   1
   8  -3   0   59660    2596  -2
   8   3   0   59660    2596   1
   9  -3   0   78377    7602  -2
   9   3   0   78377    7602   1
  10  -3   0   61169    3031  -2
  10   3   0   61169    3031   1
  11  -3   0     483    1477  -2
  11   3   0     483    1477   1
  12  -3   0   12763    2020  -2
  12   3   0   12763    2020   1
  13  -3   0    -202    1663  -2
  13   3   0    -202    1663   1
  14  -3   0   26363    2812  -2
  14   3   0   26363    2812   1
  15  -3   0    6711    2488  -2
  15   3   0    6711    2488   1
  16   3   0   97648    4467   1
  17   3   0   -2745    2746   1
  18   3   0   51959    4158   1
  19   3   0   16287    2935   1
  20   3   0   26897    3431   1
  21   3   0    2569    3663   1
  22   3   0    2986    2855   1
  23   3   0   13856    3583   1
   0  -4   0 1944197   25977  -2
   0   4   0 1944197   25977   1
   1  -4   0    4057    1076  -2
   1   4   0    4057    1076   1
   2  -4   0 1875355   17876  -2
   2   4   0 1875355   17876   1
   3  -4   0   20109    1679  -2
   3   4   0   20109    1679   1
   4  -4   0 3142896   28958  -2
   4   4   0 3142896   28958   1
   5  -4   0   16062    1438  -2
   5   4   0   16062    1438   1
   6  -4   0 1544403   15637  -2
   6   4   0 1544403   15637   1
   7  -4   0    3044    1322  -2
   7   4   0    3044    1322   1
   8  -4   0 2542580   24666  -2
   8   4   0 2542580   24666   1
   9  -4   0   -1226    1659  -2
   9   4   0   -1226    1659   1
  10  -4   0  781738    9866  -2
  10   4   0  781738    9866   1
  11  -4   0     571    1796  -2
  11   4   0     571    1796   1
  12  -4   0  385271    6580  -2
  12   4   0  385271    6580   1
  13  -4   0   26162    2497  -2
  13   4   0   26162    2497   1
  14  -4   0  156594    4651  -2
  14   4   0  156594    4651   1
  15  -4   0   16973    5846  -2
  15   4   0   16973    5846   1
  16   4   0  264210    6148   1
  17   4   0     497    2454   1
  18   4   0  213086    8454   1
  19   4   0    6803    2780   1
  20   4   0   73650    6178   1
  21   4   0   26565    3499   1
  22   4   0   35949    5002   1
  23   4   0   31989    4488   1
   1  -5   0 1594526   15871  -2
   1   5   0 1594526   15871   1
   2  -5   0   11276    1405  -2
   2   5   0   11276    1405   1
   3  -5   0  516509    6598  -2
   3   5   0  516509    6598   1
   4  -5   0   88807    2988  -2
   4   5   0   88807    2988   1
   5  -5   0  114711    2999  -2
   5   5   0  114711    2999   1
   6  -5   0  111433    3110  -2
   6   5   0  111433    3110   1
   7  -5   0  157885    4410  -2
   7   5   0  157885    4410   1
   8  -5   0  207623    4683  -2
   8   5   0  207623    4683   1
   9  -5   0   92490    3441  -2
   9   5   0   92490    3441   1
  10  -5   0  141266    3984  -2
  10   5   0  141266    3984   1
  11  -5   0   10762    1908  -2
  11   5   0   10762    1908   1
  12  -5   0   85182    6054  -2
  12   5   0   85182    6054   1
  13  -5   0    3007    1822  -2
  13   5   0    3007    1822   1
  14  -5   0   65109    4454  -2
  14   5   0   65109    4454   1
  15  -5   0   54652    3455  -2
  15   5   0   54652    3455   1
  16   5   0  102980    4830   1
  17   5   0     705    2700   1
  18   5   0   80061    5341   1
  19   5   0    3456    2593   1
  20   5   0   35706    3727   1
  21   5   0    1942    2632   1
  22   5   0   16935    3489   1
  23   5   0    4159    5440   1
   0  -6   0  367045    7728  -2
   0   6   0  367045    7728   1
   1  -6   0     216    1126  -2
   1   6   0     216    1126   1
   2  -6   0   21648    1706  -2
   2   6   0   21648    1706   1
   3  -6   0     715    1156  -2
   3   6   0     715    1156   1
   4  -6   0    9226    1664  -2
   4   6   0    9226    1664   1
   5  -6   0   33830    2110  -2
   5   6   0   33830    2110   1
   6  -6   0   84998    3137  -2
   6   6   0   84998    3137   1
   7  -6   0   41732    2393  -2
   7   6   0   41732    2393   1
   8  -6   0  375332    6130  -2
   8   6   0  375332    6130   1
   9  -6   0   46974    2677  -2
   9   6   0   46974    2677   1
  10  -6   0  278303    5465  -2
  10   6   0  278303    5465   1
  11  -6   0    1870    1689  -2
  11   6   0    1870    1689   1
  12  -6   0  100137    5336  -2
  12   6   0  100137    5336   1
  13  -6   0    -231    1645  -2
  13   6   0    -231    1645   1
  14  -6   0    9180    2193  -2
  14   6   0    9180    2193   1
  15  -6   0   12226    2411  -2
  15   6   0   12226    2411   1
  16   6   0   40032    3771   1
  17   6   0   -1253    2619   1
  18   6   0   10053    2859   1
  19   6   0    3299    2569   1
  20   6   0    7741    2870   1
  21   6   0    5512    2681   1
  22   6   0    1885    2633   1
   1  -7   0   11326    1565  -2
   1   7   0   11326    1565   1
   2  -7   0    -920    1232  -2
   2   7   0    -920    1232   1
   3  -7   0   62703    2754  -2
   3   7   0   62703    2754   1
   4  -7   0   56069    2656  -2
   4   7   0   56069    2656   1
   5  -7   0   46333    2547  -2
   5   7   0   46333    2547   1
   6  -7   0   15080    2083  -2
   6   7   0   15080    2083   1
   7  -7   0    2115    1568  -2
   7   7   0    2115    1568   1
   8  -7   0   11761    1884  -2
   8   7   0   11761    1884   1
   9  -7   0   90167    4124  -2
   9   7   0   90167    4124   1
  10  -7   0    -560    1565  -2
  10   7   0    -560    1565   1
  11  -7   0   37290    2719  -2
  11   7   0   37290    2719   1
  12  -7   0    9566    2673  -2
  12   7   0    9566    2673   1
  13  -7   0    1401    2075  -2
  13   7   0    1401    2075   1
  14  -7   0   27219    3287  -2
  14   7   0   27219    3287   1
  15  -7   0    6783    2957  -2
  15   7   0    6783    2957   1
  16   7   0   48719    3964   1
  17   7   0    3824    2553   1
  18   7   0   72345    4721   1
  19   7   0    8990    2786   1
  20   7   0   18458    3488   1
  21   7   0    5998    2812   1
  22   7   0   17956    7140   1
   0  -8   0  910255   15628  -2
   0   8   0  910255   15628   1
   1  -8   0   20703    2044  -2
   1   8   0   20703    2044   1
   2  -8   0 1671802   17754  -2
   2   8   0 1671802   17754   1
   3  -8   0    1377    1459  -2
   3   8   0    1377    1459   1
   4  -8   0 2898260   28464  -2
   4   8   0 2898260   28464   1
   5  -8   0   10432    1765  -2
   5   8   0   10432    1765   1
   6  -8   0 1919376   20329  -2
   6   8   0 1919376   20329   1
   7  -8   0    2690    1571  -2
   7   8   0    2690    1571   1
   8  -8   0  840647   11002  -2
   8   8   0  840647   11002   1
   9  -8   0    4161    1759  -2
   9   8   0    4161    1759   1
  10  -8   0  346263    7591  -2
  10   8   0  346263    7591   1
  11  -8   0    3351    1874  -2
  11   8   0    3351    1874   1
  12  -8   0   98347    4258  -2
  12   8   0   98347    4258   1
  13  -8   0    4494    2175  -2
  13   8   0    4494    2175   1
  14  -8   0  149323    5980  -2
  14   8   0  149323    5980   1
  15  -8   0    9536    3196  -2
  15   8   0    9536    3196   1
  16   8   0  187557    8347   1
  17   8   0   24331    3308   1
  18   8   0  134219    6309   1
  19   8   0   25254    3523   1
  20   8   0   71721    4727   1
  21   8   0   10306    3039   1
  22   8   0   24864   26451   1
   1  -9   0    5819    1747  -2
   1   9   0    5819    1747   1
   2  -9   0   92950    3789  -2
   2   9   0   92950    3789   1
   3  -9   0  305628    5868  -2
   3   9   0  305628    5868   1
   4  -9   0   70647    3315  -2
   4   9   0   70647    3315   1
   5  -9   0  135768    4246  -2
   5   9   0  135768    4246   1
   6  -9   0   68241    3413  -2
   6   9   0   68241    3413   1
   7  -9   0   26080    2455  -2
   7   9   0   26080    2455   1
   8  -9   0   37125    2766  -2
   8   9   0   37125    2766   1
   9  -9   0   13207    2101  -2
   9   9   0   13207    2101   1
  10  -9   0   14969    2563  -2
  10   9   0   14969    2563   1
  11  -9   0   77295    4098  -2
  11   9   0   77295    4098   1
  12  -9   0   15926    2782  -2
  12   9   0   15926    2782   1
  13  -9   0   83643    4830  -2
  13   9   0   83643    4830   1
  14  -9   0   55977    4239  -2
  14   9   0   55977    4239   1
  15  -9   0   -2445    2445  -2
  15   9   0   -2445    2445   1
  16   9   0  226585    9362   1
  17   9   0   44033    3967   1
  18   9   0  180921    7863   1
  19   9   0    4602    2817   1
  20   9   0   59758    4607   1
  21   9   0     193    2431   1
   0 -10   0 1127755   19447  -2
   0  10   0 1127755   19447   1
   1 -10   0   28271    2402  -2
   1  10   0   28271    2402   1
   2 -10   0  350935    6547  -2
   2  10   0  350935    6547   1
   3 -10   0    2066    1657  -2
   3  10   0    2066    1657   1
   4 -10   0  110606    4597  -2
   4  10   0  110606    4597   1
   5 -10   0   11481    2373  -2
   5  10   0   11481    2373   1
   6 -10   0  235697    5529  -2
   6  10   0  235697    5529   1
   7 -10   0   53647    3283  -2
   7  10   0   53647    3283   1
   8 -10   0   64779    3632  -2
   8  10   0   64779    3632   1
   9 -10   0   51162    3244  -2
   9  10   0   51162    3244   1
  10 -10   0  134900    6808  -2
  10  10   0  134900    6808   1
  11 -10   0   41639    3685  -2
  11  10   0   41639    3685   1
  12 -10   0   71275    5099  -2
  12  10   0   71275    5099   1
  13 -10   0     537    2518  -2
  13  10   0     537    2518   1
  14 -10   0  105555    5529  -2
  14  10   0  105555    5529   1
  15 -10   0    5227    2709  -2
  15  10   0    5227    2709   1
  16  10   0  190071    9928   1
  17  10   0   34212    3825   1
  18  10   0   70401    4758   1
  19  10   0   24234    3496   1
  20  10   0    7553    3036   1
  21  10   0     251    2628   1
   1 -11   0   35110    3261  -2
   1  11   0   35110    3261   1
   2 -11   0    4133    1711  -2
   2  11   0    4133    1711   1
   3 -11   0   67255    3603  -2
   3  11   0   67255    3603   1
   4 -11   0    1248    1742  -2
   4  11   0    1248    1742   1
   5 -11   0    -400    1745  -2
   5  11   0    -400    1745   1
   6 -11   0    1470    1826  -2
   6  11   0    1470    1826   1
   7 -11   0   38834    3189  -2
   7  11   0   38834    3189   1
   8 -11   0   16721    2784  -2
   8  11   0   16721    2784   1
   9 -11   0    4560    2344  -2
   9  11   0    4560    2344   1
  10 -11   0    1599    2205  -2
  10  11   0    1599    2205   1
  11 -11   0   75669    4720  -2
  11  11   0   75669    4720   1
  12 -11   0   47728    3979  -2
  12  11   0   47728    3979   1
  13 -11   0   24391    3398  -2
  13  11   0   24391    3398   1
  14 -11   0   19361    3327  -2
  14  11   0   19361    3327   1
  15 -11   0   12399    3066  -2
  15  11   0   12399    3066   1
  16  11   0    5629    2863   1
  17  11   0     483    2781   1
  18  11   0    -172    3293   1
  19  11   0    3197    3629   1
  20  11   0   13880    4165   1
   0 -12   0 1050704   19550  -2
   0  12   0 1050704   19550   1
   1 -12   0   46663    4747  -2
   1  12   0   46663    4747   1
   2 -12   0  817299   12277  -2
   2  12   0  817299   12277   1
   3 -12   0    9340    2149  -2
   3  12   0    9340    2149   1
   4 -12   0  460119    9743  -2
   4  12   0  460119    9743   1
   5 -12   0   23839    3577  -2
   5  12   0   23839    3577   1
   6 -12   0  279258    7981  -2
   6  12   0  279258    7981   1
   7 -12   0   18803    2991  -2
   7  12   0   18803    2991   1
   8 -12   0   85386    5066  -2
   8  12   0   85386    5066   1
   9 -12   0   10094    2776  -2
   9  12   0   10094    2776   1
  10 -12   0  240772    8285  -2
  10  12   0  240772    8285   1
  11 -12   0    9135    3395  -2
  11  12   0    9135    3395   1
  12 -12   0  557146   19864  -2
  12  12   0  557146   19864   1
  13 -12   0    6848    4521  -2
  13  12   0    6848    4521   1
  14 -12   0  237008   10079  -2
  14  12   0  237008   10079   1
  15 -12   0   16290    3432  -2
  15  12   0   16290    3432   1
  16  12   0   54673    5056   1
  17  12   0   -1943    2770   1
  18  12   0   15883    3383   1
  19  12   0    3981    2915   1
   1 -13   0  307487    7294  -2
   1  13   0  307487    7294   1
   2 -13   0   58747    9966  -2
   2  13   0   58747    9966   1
   3 -13   0  578970   11547  -2
   3  13   0  578970   11547   1
   4 -13   0   34399    3547  -2
   4  13   0   34399    3547   1
   5 -13   0  124404    5922  -2
   5  13   0  124404    5922   1
   6 -13   0    6637    2788  -2
   6  13   0    6637    2788   1
   7 -13   0    3324    2388  -2
   7  13   0    3324    2388   1
   8 -13   0   33147    3740  -2
   8  13   0   33147    3740   1
   9 -13   0   22535    4400  -2
   9  13   0   22535    4400   1
  10 -13   0   89423    5425  -2
  10  13   0   89423    5425   1
  11 -13   0    8702    2918  -2
  11  13   0    8702    2918   1
  12 -13   0  202071    9729  -2
  12  13   0  202071    9729   1
  13 -13   0   22636    3362  -2
  13  13   0   22636    3362   1
  14 -13   0   62856    4939  -2
  14  13   0   62856    4939   1
  15 -13   0   27754    4502  -2
  15  13   0   27754    4502   1
  16  13   0    3693    3260   1
  17  13   0   30204    4267   1
  18  13   0   42444    5470   1
  19  13   0   57008    6684   1
   0 -14   0  681081   22160  -2
   0  14   0  681081   22160   1
   1 -14   0   73577    5998  -2
   1  14   0   73577    5998   1
   2 -14   0  421196   12839  -2
   2  14   0  421196   12839   1
   3 -14   0   11960    3877  -2
   3  14   0   11960    3877   1
   4 -14   0   49195    5088  -2
   4  14   0   49195    5088   1
   5 -14   0     816    2993  -2
   5  14   0     816    2993   1
   6 -14   0  114058    6272  -2
   6  14   0  114058    6272   1
   7 -14   0   28895    3867  -2
   7  14   0   28895    3867   1
   8 -14   0  165956    7397  -2
   8  14   0  165956    7397   1
   9 -14   0   14377    3336  -2
   9  14   0   14377    3336   1
  10 -14   0  219702    7792  -2
  10  14   0  219702    7792   1
  11 -14   0    7593    2930  -2
  11  14   0    7593    2930   1
  12 -14   0  323154   12773  -2
  12  14   0  323154   12773   1
  13 -14   0   16809    3392  -2
  13  14   0   16809    3392   1
  14 -14   0  135003    9352  -2
  14  14   0  135003    9352   1
  15 -14   0   31200    4190  -2
  15  14   0   31200    4190   1
  16  14   0   60373    6255   1
  17  14   0   14257    5812   1
  18  14   0   53284    6349   1
   1 -15   0    8979    3858  -2
   1  15   0    8979    3858   1
   2 -15   0   23265    4973  -2
   2  15   0   23265    4973   1
   3 -15   0   43895    5670  -2
   3  15   0   43895    5670   1
   4 -15   0     433    3658  -2
   4  15   0     433    3658   1
   5 -15   0   -2177    3525  -2
   5  15   0   -2177    3525   1
   6 -15   0   12489    4310  -2
   6  15   0   12489    4310   1
   7 -15   0   -3778    3778  -2
   7  15   0   -3778    3778   1
   8 -15   0   -3431    5501  -2
   8  15   0   -3431    5501   1
   9 -15   0     735    3819  -2
   9  15   0     735    3819   1
  10 -15   0   19309    5197  -2
  10  15   0   19309    5197   1
  11 -15   0   13090    4770  -2
  11  15   0   13090    4770   1
  12 -15   0    2775    3916  -2
  12  15   0    2775    3916   1
  13 -15   0    3217    3947  -2
  13  15   0    3217    3947   1
  14 -15   0    3547    4262  -2
  14  15   0    3547    4262   1
  15 -15   0   -1052    3917  -2
  15  15   0   -1052    3917   1
  16  15   0   21965    5066   1
  17  15   0    6949    4705   1
   0 -16   0  175404   18127  -2
   0  16   0  175404   18127   1
   1 -16   0    6473    3960  -2
   1  16   0    6473    3960   1
   2 -16   0  202948   10746  -2
   2  16   0  202948   10746   1
   3 -16   0    3991    4693  -2
   3  16   0    3991    4693   1
   4 -16   0  356011   12114  -2
   4  16   0  356011   12114   1
   5 -16   0   36368    5960  -2
   5  16   0   36368    5960   1
   6 -16   0  149035    9378  -2
   6  16   0  149035    9378   1
   7 -16   0   15701    5531  -2
   7  16   0   15701    5531   1
   8 -16   0    4392    4889  -2
   8  16   0    4392    4889   1
   9 -16   0   18834    5038  -2
   9  16   0   18834    5038   1
  10 -16   0   12157    4628  -2
  10  16   0   12157    4628   1
  11 -16   0   -2090    3653  -2
  11  16   0   -2090    3653   1
  12 -16   0   97738    8201  -2
  12  16   0   97738    8201   1
  13 -16   0   -3630    4642  -2
  13  16   0   -3630    4642   1
  14 -16   0  136747    9971  -2
  14  16   0  136747    9971   1
  15 -16   0    2042    4546  -2
  15  16   0    2042    4546   1
  16  16   0   74234    7910   1
   1 -17   0   34441    5885  -2
   1  17   0   34441    5885   1
   2 -17   0    5098    4003  -2
   2  17   0    5098    4003   1
   3 -17   0   43165    5732  -2
   3  17   0   43165    5732   1
   4 -17   0    2898    5655  -2
   4  17   0    2898    5655   1
   5 -17   0   -3681    3920  -2
   5  17   0   -3681    3920   1
   6 -17   0    8430    4279  -2
   6  17   0    8430    4279   1
   7 -17   0     292    4786  -2
   7  17   0     292    4786   1
   8 -17   0   32726    6366  -2
   8  17   0   32726    6366   1
   9 -17   0   21718    5317  -2
   9  17   0   21718    5317   1
  10 -17   0   24272    5641  -2
  10  17   0   24272    5641   1
  11 -17   0   46105    9980  -2
  11  17   0   46105    9980   1
  12 -17   0   37504    6112  -2
  12  17   0   37504    6112   1
  13 -17   0   23068    5334  -2
  13  17   0   23068    5334   1
  14 -17   0   28726    5715  -2
  14  17   0   28726    5715   1
   0 -18   0   22140    8826  -2
   0  18   0   22140    8826   1
   1 -18   0   15761    4845  -2
   1  18   0   15761    4845   1
   2 -18   0   95988   10924  -2
   2  18   0   95988   10924   1
   3 -18   0    6384    4060  -2
   3  18   0    6384    4060   1
   4 -18   0  291458   14327  -2
   4  18   0  291458   14327   1
   5 -18   0   12082    4682  -2
   5  18   0   12082    4682   1
   6 -18   0  380916   13853  -2
   6  18   0  380916   13853   1
   7 -18   0   18221    5277  -2
   7  18   0   18221    5277   1
   8 -18   0  186097   13568  -2
   8  18   0  186097   13568   1
   9 -18   0   11806    5026  -2
   9  18   0   11806    5026   1
  10 -18   0  136212    9797  -2
  10  18   0  136212    9797   1
  11 -18   0   26881    6004  -2
  11  18   0   26881    6004   1
  12 -18   0   93097    8944  -2
  12  18   0   93097    8944   1
  13 -18   0    8329    4903  -2
  13  18   0    8329    4903   1
   1 -19   0   -3973    3973  -2
   1  19   0   -3973    3973   1
   2 -19   0    -722    3847  -2
   2  19   0    -722    3847   1
   3 -19   0    7719    6588  -2
   3  19   0    7719    6588   1
   4 -19   0     255    4199  -2
   4  19   0     255    4199   1
   5 -19   0   15491    6824  -2
   5  19   0   15491    6824   1
   6 -19   0    1117    4489  -2
   6  19   0    1117    4489   1
   7 -19   0   12726    5464  -2
   7  19   0   12726    5464   1
   8 -19   0   -2587    4261  -2
   8  19   0   -2587    4261   1
   9 -19   0     305    4304  -2
   9  19   0     305    4304   1
  10 -19   0    1215    4643  -2
  10  19   0    1215    4643   1
  11 -19   0   -2089    4325  -2
  11  19   0   -2089    4325   1
   0 -20   0   33038    8653  -2
   0  20   0   33038    8653   1
   1 -20   0   52262    7995  -2
   1  20   0   52262    7995   1
   2 -20   0   60550   16903  -2
   2  20   0   60550   16903   1
   3 -20   0    2951    4757  -2
   3  20   0    2951    4757   1
   4 -20   0   99516    9140  -2
   4  20   0   99516    9140   1
   5 -20   0   14053    5228  -2
   5  20   0   14053    5228   1
   6 -20   0   54339    7720  -2
   6  20   0   54339    7720   1
   7 -20   0   -3219    4507  -2
   7  20   0   -3219    4507   1
   8 -20   0   33674    6823  -2
   8  20   0   33674    6823   1
   9 -20   0   11392    5488  -2
   9  20   0   11392    5488   1
   1 -21   0   -4938    6310  -2
   1  21   0   -4938    6310   1
   2 -21   0   -1470    4857  -2
   2  21   0   -1470    4857   1
   3 -21   0   -4282    4282  -2
   3  21   0   -4282    4282   1
   4 -21   0   32680    8657  -2
   4  21   0   32680    8657   1
   5 -21   0    2376    7150  -2
   5  21   0    2376    7150   1
   6 -21   0   25641   10842  -2
   6  21   0   25641   10842   1
 -24   1   1    2688    4113   1
 -23   1   1   20327    4849   1
 -22   1   1    7029    5638   1
 -21   1   1   16571    6178   1
 -20   1   1     790    2309   1
 -19   1   1   16534    3863   1
 -18   1   1  110317    6167   1
 -17   1   1   44009    3435   1
 -15  -1  -1   99298    4648  -2
 -16   1   1   99298    4648   1
 -14  -1  -1   59215    3519  -2
 -15   1   1   59215    3519   1
 -13  -1  -1    4415    1936  -2
 -14   1   1    4415    1936   1
 -12  -1  -1   82188    3639  -2
 -13   1   1   82188    3639   1
 -11  -1  -1   87629    3718  -2
 -12   1   1   87629    3718   1
 -10  -1  -1  127610    6813  -2
 -11   1   1  127610    6813   1
  -9  -1  -1   92005    3564  -2
 -10   1   1   92005    3564   1
  -8  -1  -1   34014    3016  -2
  -9   1   1   34014    3016   1
  -7  -1  -1   78679    5433  -2
  -8   1   1   78679    5433   1
  -6  -1  -1  422985    6854  -2
  -7   1   1  422985    6854   1
  -5  -1  -1  289281    4593  -2
  -6   1   1  289281    4593   1
  -4  -1  -1  311768    8890  -2
  -5   1   1  311768    8890   1
  -3  -1  -1    7677    1122  -2
  -4   1   1    7677    1122   1
  -2  -1  -1   77909    1792  -2
  -3   1   1   77909    1792   1
  -1  -1  -1  928240   12632  -2
  -2   1   1  928240   12632   1
   0  -1  -1    -595     906  -2
  -1   1   1    -595     906   1
   2  -1  -1  153821    5760  -2
   1   1   1  153821    5760   1
   3  -1  -1  260878    4423  -2
   2   1   1  260878    4423   1
   4  -1  -1   47309    2941  -2
   3   1   1   47309    2941   1
   5  -1  -1  438593    4898  -2
   4   1   1  438593    4898   1
   6  -1  -1  580479    7303  -2
   5   1   1  580479    7303   1
   7  -1  -1  308087    4282  -2
   6   1   1  308087    4282   1
   8  -1  -1  509335    7008  -2
   7   1   1  509335    7008   1
   9  -1  -1  140213    4395  -2
   8   1   1  140213    4395   1
  10  -1  -1    8994    1944  -2
   9   1   1    8994    1944   1
  11  -1  -1  259413    5379  -2
  10   1   1  259413    5379   1
  12  -1  -1    9553    1646  -2
  11   1   1    9553    1646   1
  13  -1  -1  186744    4378  -2
  12   1   1  186744    4378   1
  14  -1  -1   38624    2648  -2
  13   1   1   38624    2648   1
  15  -1  -1  117796    4280  -2
  14   1   1  117796    4280   1
  16  -1  -1    8581    2401  -2
  15   1   1    8581    2401   1
  16   1   1  329934    7709   1
  17   1   1   16613    2575   1
  18   1   1  110860    4696   1
  19   1   1    3621    2890   1
  20   1   1   73905    4164   1
  21   1   1    4055    3230   1
  22   1   1   22378    3393   1
  23   1   1    2086    2492   1
 -24   2   1   98843    7858   1
 -23   2   1    7696    4218   1
 -22   2   1  138305    9665   1
 -21   2   1     291    2658   1
 -20   2   1  169463    7164   1
 -19   2   1    1666    2916   1
 -18   2   1  225325    6254   1
 -17   2   1   27665    3328   1
 -15  -2  -1  234294    6080  -2
 -16   2   1  234294    6080   1
 -14  -2  -1    4096    2046  -2
 -15   2   1    4096    2046   1
 -13  -2  -1  475670    8028  -2
 -14   2   1  475670    8028   1
 -12  -2  -1   17594    2150  -2
 -13   2   1   17594    2150   1
 -11  -2  -1  435682    7215  -2
 -12   2   1  435682    7215   1
 -10  -2  -1   39737    2588  -2
 -11   2   1   39737    2588   1
  -9  -2  -1  777101   10003  -2
 -10   2   1  777101   10003   1
  -8  -2  -1  426288    6522  -2
  -9   2   1  426288    6522   1
  -7  -2  -1 1102502   12474  -2
  -8   2   1 1102502   12474   1
  -6  -2  -1 1331325   13952  -2
  -7   2   1 1331325   13952   1
  -5  -2  -1 1647085   18840  -2
  -6   2   1 1647085   18840   1
  -4  -2  -1  202850    5474  -2
  -5   2   1  202850    5474   1
  -3  -2  -1 1351713   13312  -2
  -4   2   1 1351713   13312   1
  -2  -2  -1  249238    7540  -2
  -3   2   1  249238    7540   1
  -1  -2  -1  871097    8684  -2
  -2   2   1  871097    8684   1
   0  -2  -1  124452    2341  -2
  -1   2   1  124452    2341   1
   1  -2  -1  661475    8809  -2
   0   2   1  661475    8809   1
   2  -2  -1  277991    3216  -2
   1   2   1  277991    3216   1
   3  -2  -1  971441   13781  -2
   2   2   1  971441   13781   1
   4  -2  -1  242164   10032  -2
   3   2   1  242164   10032   1
   5  -2  -1  961082    9487  -2
   4   2   1  961082    9487   1
   6  -2  -1  268297    6177  -2
   5   2   1  268297    6177   1
   7  -2  -1  538097    7447  -2
   6   2   1  538097    7447   1
   8  -2  -1  996457   10601  -2
   7   2   1  996457   10601   1
   9  -2  -1  151315    5141  -2
   8   2   1  151315    5141   1
  10  -2  -1  166469    5940  -2
   9   2   1  166469    5940   1
  11  -2  -1   81795    5592  -2
  10   2   1   81795    5592   1
  12  -2  -1   69415    4029  -2
  11   2   1   69415    4029   1
  13  -2  -1  109010    4110  -2
  12   2   1  109010    4110   1
  14  -2  -1   58014    3496  -2
  13   2   1   58014    3496   1
  15  -2  -1   26499    2519  -2
  14   2   1   26499    2519   1
  16  -2  -1   96080    3969  -2
  15   2   1   96080    3969   1
  16   2   1   45586    3280   1
  17   2   1   50353    3391   1
  18   2   1    9818    2381   1
  19   2   1   34360    2985   1
  20   2   1    2964    3086   1
  21   2   1   32999    3589   1
  22   2   1    3746    3037   1
  23   2   1   20274    9682   1
 -24   3   1    7313    4392   1
 -23   3   1   23953    4015   1
 -22   3   1   -1710    3180   1
 -21   3   1   51010    4438   1
 -20   3   1    5403    3191   1
 -19   3   1   59530    5377   1
 -18   3   1   93933    4899   1
 -17   3   1   58127    3780   1
 -15  -3  -1    5136    2276  -2
 -16   3   1    5136    2276   1
 -14  -3  -1   12408    2161  -2
 -15   3   1   12408    2161   1
 -13  -3  -1    -794    1857  -2
 -14   3   1    -794    1857   1
 -12  -3  -1   54257    2847  -2
 -13   3   1   54257    2847   1
 -11  -3  -1    8786    1944  -2
 -12   3   1    8786    1944   1
 -10  -3  -1   62675    4293  -2
 -11   3   1   62675    4293   1
  -9  -3  -1  476162    7269  -2
 -10   3   1  476162    7269   1
  -7  -3  -1  678420   10089  -2
  -8   3   1  678420   10089   1
  -6  -3  -1  123909    5647  -2
  -7   3   1  123909    5647   1
  -5  -3  -1  184655    4275  -2
  -6   3   1  184655    4275   1
  -4  -3  -1  255609   14869  -2
  -5   3   1  255609   14869   1
  -3  -3  -1  268531    4265  -2
  -4   3   1  268531    4265   1
  -2  -3  -1  209492    4035  -2
  -3   3   1  209492    4035   1
  -1  -3  -1  142932    3134  -2
  -2   3   1  142932    3134   1
   0  -3  -1  148928    3370  -2
  -1   3   1  148928    3370   1
   1  -3  -1  437245    5780  -2
   0   3   1  437245    5780   1
   2  -3  -1  328228    4176  -2
   1   3   1  328228    4176   1
   3  -3  -1  149583    2573  -2
   2   3   1  149583    2573   1
   4  -3  -1  191491    2993  -2
   3   3   1  191491    2993   1
   5  -3  -1 1027889   11755  -2
   4   3   1 1027889   11755   1
   6  -3  -1   56955    3376  -2
   5   3   1   56955    3376   1
   7  -3  -1  755141    8365  -2
   6   3   1  755141    8365   1
   8  -3  -1  319565    5455  -2
   7   3   1  319565    5455   1
   9  -3  -1 2058615   20114  -2
   8   3   1 2058615   20114   1
  10  -3  -1  156835    3989  -2
   9   3   1  156835    3989   1
  11  -3  -1  368202    5821  -2
  10   3   1  368202    5821   1
  12  -3  -1   45327    2715  -2
  11   3   1   45327    2715   1
  13  -3  -1  395276    6437  -2
  12   3   1  395276    6437   1
  14  -3  -1      36    1639  -2
  13   3   1      36    1639   1
  15  -3  -1  137258    4395  -2
  14   3   1  137258    4395   1
  16  -3  -1    -786    1826  -2
  15   3   1    -786    1826   1
  16   3   1  199867    6846   1
  17   3   1     -36    1979   1
  18   3   1  163339    5186   1
  19   3   1     758    2236   1
  20   3   1   75674    5197   1
  21   3   1     224    3427   1
  22   3   1   74334    7225   1
  23   3   1    4485    4115   1
 -23   4   1    1925    3192   1
 -22   4   1    1392    2902   1
 -21   4   1    3321    2821   1
 -20   4   1    5964    3284   1
 -19   4   1    4935    2885   1
 -18   4   1   23263    4176   1
 -17   4   1     502    2625   1
 -15  -4  -1  108967    5573  -2
 -16   4   1  108967    5573   1
 -14  -4  -1    -942    1806  -2
 -15   4   1    -942    1806   1
 -13  -4  -1   24046    2629  -2
 -14   4   1   24046    2629   1
 -12  -4  -1     155    1707  -2
 -13   4   1     155    1707   1
 -11  -4  -1   27018    2407  -2
 -12   4   1   27018    2407   1
 -10  -4  -1   67417    3361  -2
 -11   4   1   67417    3361   1
  -9  -4  -1   17536    1958  -2
 -10   4   1   17536    1958   1
  -8  -4  -1  126254    4317  -2
  -9   4   1  126254    4317   1
  -7  -4  -1   14891    2363  -2
  -8   4   1   14891    2363   1
  -6  -4  -1   22279    2500  -2
  -7   4   1   22279    2500   1
  -5  -4  -1  132755    3262  -2
  -6   4   1  132755    3262   1
  -4  -4  -1  295732    4960  -2
  -5   4   1  295732    4960   1
  -3  -4  -1   89205    2766  -2
  -4   4   1   89205    2766   1
  -2  -4  -1  778152   10036  -2
  -3   4   1  778152   10036   1
  -1  -4  -1  213732   10475  -2
  -2   4   1  213732   10475   1
   0  -4  -1  416074    6820  -2
  -1   4   1  416074    6820   1
   1  -4  -1   91507    2761  -2
   0   4   1   91507    2761   1
   2  -4  -1 1123021   13188  -2
   1   4   1 1123021   13188   1
   3  -4  -1  278466    5670  -2
   2   4   1  278466    5670   1
   4  -4  -1   16706    1321  -2
   3   4   1   16706    1321   1
   5  -4  -1   81884    2257  -2
   4   4   1   81884    2257   1
   6  -4  -1   90387    2623  -2
   5   4   1   90387    2623   1
   7  -4  -1   35009    3012  -2
   6   4   1   35009    3012   1
   8  -4  -1   76090    2657  -2
   7   4   1   76090    2657   1
   9  -4  -1   88718    3988  -2
   8   4   1   88718    3988   1
  10  -4  -1   52582    4130  -2
   9   4   1   52582    4130   1
  11  -4  -1   50468    2482  -2
  10   4   1   50468    2482   1
  12  -4  -1    3426    1559  -2
  11   4   1    3426    1559   1
  13  -4  -1   37860    2545  -2
  12   4   1   37860    2545   1
  14  -4  -1    -516    1824  -2
  13   4   1    -516    1824   1
  15  -4  -1   17034    2275  -2
  14   4   1   17034    2275   1
  16  -4  -1   11337    2591  -2
  15   4   1   11337    2591   1
  16   4   1    1677    2516   1
  17   4   1   -1566    2056   1
  18   4   1    1609    2185   1
  19   4   1     640    2231   1
  20   4   1      21    2402   1
  21   4   1     735    2321   1
  22   4   1    1741    3085   1
 -23   5   1    3775    3168   1
 -22   5   1    3568    2964   1
 -21   5   1    9119    4724   1
 -20   5   1    5680    3845   1
 -19   5   1    7314    2824   1
 -18   5   1   -2653    2653   1
 -17   5   1   12786    2963   1
 -15  -5  -1    7976    2465  -2
 -16   5   1    7976    2465   1
 -14  -5  -1   26719    2844  -2
 -15   5   1   26719    2844   1
 -13  -5  -1   90181    4252  -2
 -14   5   1   90181    4252   1
 -12  -5  -1   32439    2763  -2
 -13   5   1   32439    2763   1
 -11  -5  -1  123820    4188  -2
 -12   5   1  123820    4188   1
 -10  -5  -1   28178    2349  -2
 -11   5   1   28178    2349   1
  -9  -5  -1    2759    1606  -2
 -10   5   1    2759    1606   1
  -8  -5  -1   12300    1688  -2
  -9   5   1   12300    1688   1
  -7  -5  -1   60411    2835  -2
  -8   5   1   60411    2835   1
  -6  -5  -1   78603    4783  -2
  -7   5   1   78603    4783   1
  -5  -5  -1   19652    1735  -2
  -6   5   1   19652    1735   1
  -4  -5  -1  246235    4569  -2
  -5   5   1  246235    4569   1
  -3  -5  -1   26118    2131  -2
  -4   5   1   26118    2131   1
  -2  -5  -1  362501    6232  -2
  -3   5   1  362501    6232   1
  -1  -5  -1  608006    8581  -2
  -2   5   1  608006    8581   1
   0  -5  -1   21869    1916  -2
  -1   5   1   21869    1916   1
   1  -5  -1   78733    3395  -2
   0   5   1   78733    3395   1
   2  -5  -1  271474    4282  -2
   1   5   1  271474    4282   1
   3  -5  -1  397189    5410  -2
   2   5   1  397189    5410   1
   4  -5  -1  128109    2927  -2
   3   5   1  128109    2927   1
   5  -5  -1   67971    2328  -2
   4   5   1   67971    2328   1
   6  -5  -1   61557    2461  -2
   5   5   1   61557    2461   1
   7  -5  -1  332963    5124  -2
   6   5   1  332963    5124   1
   8  -5  -1   16183    1579  -2
   7   5   1   16183    1579   1
   9  -5  -1  175028    3844  -2
   8   5   1  175028    3844   1
  10  -5  -1   33444    2223  -2
   9   5   1   33444    2223   1
  11  -5  -1  150273    5064  -2
  10   5   1  150273    5064   1
  12  -5  -1   25985    2095  -2
  11   5   1   25985    2095   1
  13  -5  -1  132668    3981  -2
  12   5   1  132668    3981   1
  14  -5  -1   32998    3403  -2
  13   5   1   32998    3403   1
  15  -5  -1   31639    2717  -2
  14   5   1   31639    2717   1
  16  -5  -1   15596    2324  -2
  15   5   1   15596    2324   1
  16   5   1   47271    3604   1
  17   5   1   -2060    2060   1
  18   5   1   30922    3410   1
  19   5   1    1787    2440   1
  20   5   1   37781    6275   1
  21   5   1    3589    2485   1
  22   5   1    7671    8077   1
 -23   6   1    -790    4027   1
 -22   6   1  107157    6108   1
 -21   6   1     681    2699   1
 -20   6   1  123674    8001   1
 -19   6   1   10391    2966   1
 -18   6   1  159862    6745   1
 -17   6   1    3168    3308   1
 -15  -6  -1  155460    6344  -2
 -16   6   1  155460    6344   1
 -14  -6  -1  120232    5005  -2
 -15   6   1  120232    5005   1
 -13  -6  -1  284944    6465  -2
 -14   6   1  284944    6465   1
 -12  -6  -1   62697    3594  -2
 -13   6   1   62697    3594   1
 -11  -6  -1  631183   14601  -2
 -12   6   1  631183   14601   1
 -10  -6  -1    6572    1824  -2
 -11   6   1    6572    1824   1
  -9  -6  -1  836168   10929  -2
 -10   6   1  836168   10929   1
  -8  -6  -1   29261    2170  -2
  -9   6   1   29261    2170   1
  -7  -6  -1  608688    8503  -2
  -8   6   1  608688    8503   1
  -6  -6  -1   30513    2692  -2
  -7   6   1   30513    2692   1
  -5  -6  -1  777771    9723  -2
  -6   6   1  777771    9723   1
  -4  -6  -1  169545    6569  -2
  -5   6   1  169545    6569   1
  -3  -6  -1  458248    6591  -2
  -4   6   1  458248    6591   1
  -2  -6  -1   67630    2636  -2
  -3   6   1   67630    2636   1
  -1  -6  -1  139146    4095  -2
  -2   6   1  139146    4095   1
   0  -6  -1    7055    1370  -2
  -1   6   1    7055    1370   1
   1  -6  -1   24326    1759  -2
   0   6   1   24326    1759   1
   2  -6  -1   18657    1771  -2
   1   6   1   18657    1771   1
   3  -6  -1  230397    4187  -2
   2   6   1  230397    4187   1
   4  -6  -1   56215    2766  -2
   3   6   1   56215    2766   1
   5  -6  -1  999693   21790  -2
   4   6   1  999693   21790   1
   6  -6  -1   92191    5235  -2
   5   6   1   92191    5235   1
   7  -6  -1  268015    4959  -2
   6   6   1  268015    4959   1
   8  -6  -1   75463    5971  -2
   7   6   1   75463    5971   1
   9  -6  -1  167413    4294  -2
   8   6   1  167413    4294   1
  10  -6  -1  149186   12760  -2
   9   6   1  149186   12760   1
  11  -6  -1    1407    1499  -2
  10   6   1    1407    1499   1
  12  -6  -1  146086   14956  -2
  11   6   1  146086   14956   1
  13  -6  -1   31544    2634  -2
  12   6   1   31544    2634   1
  14  -6  -1  101294    5588  -2
  13   6   1  101294    5588   1
  15  -6  -1   32047    2638  -2
  14   6   1   32047    2638   1
  16  -6  -1   40015    2988  -2
  15   6   1   40015    2988   1
  16   6   1   17993    2941   1
  17   6   1   21973    2920   1
  18   6   1    1209    2274   1
  19   6   1   39656    3567   1
  20   6   1   12334    4838   1
  21   6   1   25449    5113   1
  22   6   1    7419    4006   1
 -22   7   1    3327    2927   1
 -21   7   1   29316    4901   1
 -20   7   1    2265    3720   1
 -19   7   1   47087    5183   1
 -18   7   1   32019    3759   1
 -17   7   1   74305    6139   1
 -15  -7  -1   50386    4088  -2
 -16   7   1   50386    4088   1
 -14  -7  -1  120427    5698  -2
 -15   7   1  120427    5698   1
 -13  -7  -1   55907    3664  -2
 -14   7   1   55907    3664   1
 -12  -7  -1   93794    4852  -2
 -13   7   1   93794    4852   1
 -11  -7  -1  370259    7052  -2
 -12   7   1  370259    7052   1
  -9  -7  -1  426933    7415  -2
 -10   7   1  426933    7415   1
  -7  -7  -1  328133    6056  -2
  -8   7   1  328133    6056   1
  -6  -7  -1   72957   10249  -2
  -7   7   1   72957   10249   1
  -5  -7  -1  288121    5465  -2
  -6   7   1  288121    5465   1
  -4  -7  -1   60360    2825  -2
  -5   7   1   60360    2825   1
  -3  -7  -1   57154    2678  -2
  -4   7   1   57154    2678   1
  -2  -7  -1   49124    2619  -2
  -3   7   1   49124    2619   1
  -1  -7  -1  439110    6565  -2
  -2   7   1  439110    6565   1
   0  -7  -1  154058    4604  -2
  -1   7   1  154058    4604   1
   1  -7  -1  950978   11047  -2
   0   7   1  950978   11047   1
   2  -7  -1  229485    4442  -2
   1   7   1  229485    4442   1
   3  -7  -1  147060    5343  -2
   2   7   1  147060    5343   1
   4  -7  -1  131301    3487  -2
   3   7   1  131301    3487   1
   5  -7  -1  452666    6672  -2
   4   7   1  452666    6672   1
   6  -7  -1   49634    2357  -2
   5   7   1   49634    2357   1
   7  -7  -1  741422    9448  -2
   6   7   1  741422    9448   1
   8  -7  -1   39186    2605  -2
   7   7   1   39186    2605   1
   9  -7  -1 1100897   12872  -2
   8   7   1 1100897   12872   1
  10  -7  -1   99249    7499  -2
   9   7   1   99249    7499   1
  11  -7  -1  941686   11798  -2
  10   7   1  941686   11798   1
  12  -7  -1   32656    3732  -2
  11   7   1   32656    3732   1
  13  -7  -1  356916    6578  -2
  12   7   1  356916    6578   1
  14  -7  -1  125732    6991  -2
  13   7   1  125732    6991   1
  15  -7  -1  132182    4519  -2
  14   7   1  132182    4519   1
  16  -7  -1   60119    4529  -2
  15   7   1   60119    4529   1
  16   7   1  191677    5971   1
  17   7   1    2802    2338   1
  18   7   1  119201    5415   1
  19   7   1    2493    2419   1
  20   7   1  109673    5239   1
  21   7   1    2437    2445   1
  22   7   1    2350    3720   1
 -22   8   1   35833    4910   1
 -21   8   1   17954    3535   1
 -20   8   1   56942    4942   1
 -19   8   1    7022    5977   1
 -18   8   1   13428    3213   1
 -17   8   1     -50    2593   1
 -15  -8  -1    6536    2818  -2
 -16   8   1    6536    2818   1
 -14  -8  -1   37716    4742  -2
 -15   8   1   37716    4742   1
 -13  -8  -1   35743    4679  -2
 -14   8   1   35743    4679   1
 -12  -8  -1   29864    3415  -2
 -13   8   1   29864    3415   1
 -11  -8  -1  132343    5022  -2
 -12   8   1  132343    5022   1
 -10  -8  -1   65120    3570  -2
 -11   8   1   65120    3570   1
  -9  -8  -1  148125    4696  -2
 -10   8   1  148125    4696   1
  -8  -8  -1   76353    3923  -2
  -9   8   1   76353    3923   1
  -7  -8  -1  132824    4497  -2
  -8   8   1  132824    4497   1
  -6  -8  -1    9721    1745  -2
  -7   8   1    9721    1745   1
  -5  -8  -1   20526    2530  -2
  -6   8   1   20526    2530   1
  -4  -8  -1   66716    3214  -2
  -5   8   1   66716    3214   1
  -3  -8  -1  147475    4629  -2
  -4   8   1  147475    4629   1
  -2  -8  -1   14070    1892  -2
  -3   8   1   14070    1892   1
  -1  -8  -1  187670    4425  -2
  -2   8   1  187670    4425   1
   0  -8  -1   14585    2102  -2
  -1   8   1   14585    2102   1
   1  -8  -1   58316    2828  -2
   0   8   1   58316    2828   1
   2  -8  -1  146684    3887  -2
   1   8   1  146684    3887   1
   3  -8  -1  115505    3821  -2
   2   8   1  115505    3821   1
   4  -8  -1   24949    2027  -2
   3   8   1   24949    2027   1
   5  -8  -1   34727    2348  -2
   4   8   1   34727    2348   1
   6  -8  -1    3220    1542  -2
   5   8   1    3220    1542   1
   7  -8  -1  113503    4446  -2
   6   8   1  113503    4446   1
   8  -8  -1   21387    2021  -2
   7   8   1   21387    2021   1
   9  -8  -1   10085    1992  -2
   8   8   1   10085    1992   1
  10  -8  -1   40813    2584  -2
   9   8   1   40813    2584   1
  11  -8  -1   71343    3441  -2
  10   8   1   71343    3441   1
  12  -8  -1   36705    2689  -2
  11   8   1   36705    2689   1
  13  -8  -1   34939    3101  -2
  12   8   1   34939    3101   1
  14  -8  -1   93302    4669  -2
  13   8   1   93302    4669   1
  15  -8  -1    2125    2312  -2
  14   8   1    2125    2312   1
  16  -8  -1   22183    3114  -2
  15   8   1   22183    3114   1
  16   8   1     385    2323   1
  17   8   1   17356    2960   1
  18   8   1    9656    2739   1
  19   8   1    7597    2693   1
  20   8   1    3796    2527   1
  21   8   1    2413    1991   1
 -22   9   1   24906    5051   1
 -21   9   1   14293    3543   1
 -20   9   1    3634    2865   1
 -19   9   1    5814    4064   1
 -18   9   1   -3388    3388   1
 -17   9   1    8108    2899   1
 -15  -9  -1    8104    2759  -2
 -16   9   1    8104    2759   1
 -14  -9  -1   -2028    2376  -2
 -15   9   1   -2028    2376   1
 -13  -9  -1    1343    2415  -2
 -14   9   1    1343    2415   1
 -12  -9  -1    1013    2260  -2
 -13   9   1    1013    2260   1
 -11  -9  -1   16037    4010  -2
 -12   9   1   16037    4010   1
 -10  -9  -1    1932    1970  -2
 -11   9   1    1932    1970   1
  -9  -9  -1   10636    2286  -2
 -10   9   1   10636    2286   1
  -8  -9  -1    4039    1746  -2
  -9   9   1    4039    1746   1
  -7  -9  -1   40102    2921  -2
  -8   9   1   40102    2921   1
  -6  -9  -1    2332    1811  -2
  -7   9   1    2332    1811   1
  -5  -9  -1  128715    4311  -2
  -6   9   1  128715    4311   1
  -4  -9  -1   30728    2239  -2
  -5   9   1   30728    2239   1
  -3  -9  -1  169134    4467  -2
  -4   9   1  169134    4467   1
  -2  -9  -1     533    1641  -2
  -3   9   1     533    1641   1
  -1  -9  -1   19535    2202  -2
  -2   9   1   19535    2202   1
   0  -9  -1   22441    2130  -2
  -1   9   1   22441    2130   1
   1  -9  -1  104697    3950  -2
   0   9   1  104697    3950   1
   2  -9  -1    9610    1847  -2
   1   9   1    9610    1847   1
   3  -9  -1   48269    3130  -2
   2   9   1   48269    3130   1
   4  -9  -1   68075    3173  -2
   3   9   1   68075    3173   1
   5  -9  -1  316044    5943  -2
   4   9   1  316044    5943   1
   6  -9  -1  131157    4211  -2
   5   9   1  131157    4211   1
   7  -9  -1   58371    3158  -2
   6   9   1   58371    3158   1
   8  -9  -1    3775    1625  -2
   7   9   1    3775    1625   1
   9  -9  -1   59142    3695  -2
   8   9   1   59142    3695   1
  10  -9  -1   34236    2726  -2
   9   9   1   34236    2726   1
  11  -9  -1     245    1638  -2
  10   9   1     245    1638   1
  12  -9  -1   14606    3597  -2
  11   9   1   14606    3597   1
  13  -9  -1   64363    4505  -2
  12   9   1   64363    4505   1
  14  -9  -1   11675    3090  -2
  13   9   1   11675    3090   1
  15  -9  -1   44384    3750  -2
  14   9   1   44384    3750   1
  16  -9  -1   56980    4669  -2
  15   9   1   56980    4669   1
  16   9   1   21321    3069   1
  17   9   1   14694    2920   1
  18   9   1    6951    2718   1
  19   9   1    1708    2398   1
  20   9   1   11662    3970   1
  21   9   1    1501    2387   1
 -21  10   1    1281    2951   1
 -20  10   1  109435    6288   1
 -19  10   1   10417    5795   1
 -18  10   1  174257    7417   1
 -17  10   1    7574    3183   1
 -15 -10  -1  266154    9763  -2
 -16  10   1  266154    9763   1
 -14 -10  -1   12876    3225  -2
 -15  10   1   12876    3225   1
 -13 -10  -1  312836    8344  -2
 -14  10   1  312836    8344   1
 -12 -10  -1   57002    4513  -2
 -13  10   1   57002    4513   1
 -11 -10  -1  254932    7377  -2
 -12  10   1  254932    7377   1
 -10 -10  -1  143192    6686  -2
 -11  10   1  143192    6686   1
  -9 -10  -1  214775    6567  -2
 -10  10   1  214775    6567   1
  -8 -10  -1   18382    2442  -2
  -9  10   1   18382    2442   1
  -7 -10  -1  261608    6756  -2
  -8  10   1  261608    6756   1
  -6 -10  -1   17921    2338  -2
  -7  10   1   17921    2338   1
  -5 -10  -1  286892    6132  -2
  -6  10   1  286892    6132   1
  -4 -10  -1   67485    3996  -2
  -5  10   1   67485    3996   1
  -3 -10  -1  377181    6952  -2
  -4  10   1  377181    6952   1
  -2 -10  -1   50325    2791  -2
  -3  10   1   50325    2791   1
  -1 -10  -1  505461    8482  -2
  -2  10   1  505461    8482   1
   0 -10  -1   72018    3400  -2
  -1  10   1   72018    3400   1
   1 -10  -1  405185    7081  -2
   0  10   1  405185    7081   1
   2 -10  -1   62415    3317  -2
   1  10   1   62415    3317   1
   3 -10  -1  316837    6171  -2
   2  10   1  316837    6171   1
   4 -10  -1   59120    3130  -2
   3  10   1   59120    3130   1
   5 -10  -1  111803    4481  -2
   4  10   1  111803    4481   1
   6 -10  -1   89908    3746  -2
   5  10   1   89908    3746   1
   7 -10  -1   42659    2935  -2
   6  10   1   42659    2935   1
   8 -10  -1   28857    2390  -2
   7  10   1   28857    2390   1
   9 -10  -1   46177    3984  -2
   8  10   1   46177    3984   1
  10 -10  -1   49892    4249  -2
   9  10   1   49892    4249   1
  11 -10  -1   24527    2764  -2
  10  10   1   24527    2764   1
  12 -10  -1  219219    6370  -2
  11  10   1  219219    6370   1
  13 -10  -1   34499    3345  -2
  12  10   1   34499    3345   1
  14 -10  -1   58528    3915  -2
  13  10   1   58528    3915   1
  15 -10  -1   32340    3459  -2
  14  10   1   32340    3459   1
  16 -10  -1   32022    3421  -2
  15  10   1   32022    3421   1
  16  10   1    5081    2734   1
  17  10   1   39854    4516   1
  18  10   1    2412    2422   1
  19  10   1   22450    3215   1
  20  10   1    6065    3469   1
 -20  11   1    2314    4079   1
 -19  11   1   17393    3604   1
 -18  11   1    6844    4330   1
 -17  11   1   49517    5090   1
 -15 -11  -1   45505    4478  -2
 -16  11   1   45505    4478   1
 -14 -11  -1   51178    5400  -2
 -15  11   1   51178    5400   1
 -13 -11  -1   66315    5455  -2
 -14  11   1   66315    5455   1
 -12 -11  -1   78690   10055  -2
 -13  11   1   78690   10055   1
 -11 -11  -1   99696    5806  -2
 -12  11   1   99696    5806   1
 -10 -11  -1  153960   10659  -2
 -11  11   1  153960   10659   1
  -9 -11  -1  139028    6243  -2
 -10  11   1  139028    6243   1
  -8 -11  -1  128648    6859  -2
  -9  11   1  128648    6859   1
  -7 -11  -1  132697    6005  -2
  -8  11   1  132697    6005   1
  -6 -11  -1   60936    4387  -2
  -7  11   1   60936    4387   1
  -5 -11  -1  341275    7244  -2
  -6  11   1  341275    7244   1
  -4 -11  -1   55160    4900  -2
  -5  11   1   55160    4900   1
  -3 -11  -1  386436    7291  -2
  -4  11   1  386436    7291   1
  -2 -11  -1   33828    2364  -2
  -3  11   1   33828    2364   1
  -1 -11  -1  332248    7716  -2
  -2  11   1  332248    7716   1
   0 -11  -1   91166    3992  -2
  -1  11   1   91166    3992   1
   1 -11  -1  535078    9939  -2
   0  11   1  535078    9939   1
   2 -11  -1   56864    2992  -2
   1  11   1   56864    2992   1
   3 -11  -1  348402    6770  -2
   2  11   1  348402    6770   1
   4 -11  -1   65471    3221  -2
   3  11   1   65471    3221   1
   5 -11  -1  647989    9838  -2
   4  11   1  647989    9838   1
   6 -11  -1   34107    2580  -2
   5  11   1   34107    2580   1
   7 -11  -1  517823    8599  -2
   6  11   1  517823    8599   1
   8 -11  -1   14607    2306  -2
   7  11   1   14607    2306   1
   9 -11  -1  333013    7798  -2
   8  11   1  333013    7798   1
  10 -11  -1    9326    2950  -2
   9  11   1    9326    2950   1
  11 -11  -1  392484    8663  -2
  10  11   1  392484    8663   1
  12 -11  -1   11340    3624  -2
  11  11   1   11340    3624   1
  13 -11  -1  583860   11081  -2
  12  11   1  583860   11081   1
  14 -11  -1   13354    3041  -2
  13  11   1   13354    3041   1
  15 -11  -1  423091   17266  -2
  14  11   1  423091   17266   1
  16 -11  -1    6121    2769  -2
  15  11   1    6121    2769   1
  16  11   1  278714    7847   1
  17  11   1   12126    3434   1
  18  11   1  133909    6147   1
  19  11   1    7806    2490   1
  20  11   1    3799    3065   1
 -20  12   1   51539    5993   1
 -19  12   1    1820    3067   1
 -18  12   1   45805    5177   1
 -17  12   1    3485    4145   1
 -15 -12  -1   65521    6156  -2
 -16  12   1   65521    6156   1
 -14 -12  -1    5200    2952  -2
 -15  12   1    5200    2952   1
 -13 -12  -1   98361    5839  -2
 -14  12   1   98361    5839   1
 -12 -12  -1   81092    5358  -2
 -13  12   1   81092    5358   1
 -11 -12  -1  154429    8203  -2
 -12  12   1  154429    8203   1
 -10 -12  -1   54530    4954  -2
 -11  12   1   54530    4954   1
  -9 -12  -1  207329   11638  -2
 -10  12   1  207329   11638   1
  -8 -12  -1    8150    2579  -2
  -9  12   1    8150    2579   1
  -7 -12  -1  178780    6844  -2
  -8  12   1  178780    6844   1
  -6 -12  -1   37431    3865  -2
  -7  12   1   37431    3865   1
  -5 -12  -1  182356    6542  -2
  -6  12   1  182356    6542   1
  -4 -12  -1   35317    3080  -2
  -5  12   1   35317    3080   1
  -3 -12  -1  182326    5323  -2
  -4  12   1  182326    5323   1
  -2 -12  -1   14357    2438  -2
  -3  12   1   14357    2438   1
  -1 -12  -1   67332    3835  -2
  -2  12   1   67332    3835   1
   0 -12  -1   10468    2134  -2
  -1  12   1   10468    2134   1
   1 -12  -1   62075    3709  -2
   0  12   1   62075    3709   1
   2 -12  -1   65187    4090  -2
   1  12   1   65187    4090   1
   3 -12  -1  120235    5935  -2
   2  12   1  120235    5935   1
   4 -12  -1   67923    3795  -2
   3  12   1   67923    3795   1
   5 -12  -1  129289    5465  -2
   4  12   1  129289    5465   1
   6 -12  -1  105305    5123  -2
   5  12   1  105305    5123   1
   7 -12  -1  127313    6532  -2
   6  12   1  127313    6532   1
   8 -12  -1  122904    5689  -2
   7  12   1  122904    5689   1
   9 -12  -1   36579    3621  -2
   8  12   1   36579    3621   1
  10 -12  -1   17982    2843  -2
   9  12   1   17982    2843   1
  11 -12  -1    2668    2489  -2
  10  12   1    2668    2489   1
  12 -12  -1   17475    3118  -2
  11  12   1   17475    3118   1
  13 -12  -1   13200    2950  -2
  12  12   1   13200    2950   1
  14 -12  -1    9030    2730  -2
  13  12   1    9030    2730   1
  15 -12  -1    8027    2927  -2
  14  12   1    8027    2927   1
  16 -12  -1    3335    2878  -2
  15  12   1    3335    2878   1
  16  12   1     513    2732   1
  17  12   1    2590    3230   1
  18  12   1    6659    2892   1
  19  12   1    1709    5129   1
 -19  13   1   -2290    4002   1
 -18  13   1   -3350    4338   1
 -17  13   1   -3726    3726   1
 -15 -13  -1    1277    3168  -2
 -16  13   1    1277    3168   1
 -14 -13  -1   23393    3771  -2
 -15  13   1   23393    3771   1
 -13 -13  -1     529    2663  -2
 -14  13   1     529    2663   1
 -12 -13  -1    5172    2907  -2
 -13  13   1    5172    2907   1
 -11 -13  -1   31134    4888  -2
 -12  13   1   31134    4888   1
 -10 -13  -1    2635    4335  -2
 -11  13   1    2635    4335   1
  -9 -13  -1    3932    3114  -2
 -10  13   1    3932    3114   1
  -8 -13  -1   23896    3706  -2
  -9  13   1   23896    3706   1
  -7 -13  -1    3795    2777  -2
  -8  13   1    3795    2777   1
  -6 -13  -1   27726    5595  -2
  -7  13   1   27726    5595   1
  -5 -13  -1   35402    4190  -2
  -6  13   1   35402    4190   1
  -4 -13  -1   28508    4290  -2
  -5  13   1   28508    4290   1
  -3 -13  -1    4636    2963  -2
  -4  13   1    4636    2963   1
  -2 -13  -1   32157    3726  -2
  -3  13   1   32157    3726   1
  -1 -13  -1  157338    6169  -2
  -2  13   1  157338    6169   1
   0 -13  -1  198864    5898  -2
  -1  13   1  198864    5898   1
   1 -13  -1  123178    5490  -2
   0  13   1  123178    5490   1
   2 -13  -1   54438    4486  -2
   1  13   1   54438    4486   1
   3 -13  -1    6328    2471  -2
   2  13   1    6328    2471   1
   4 -13  -1   24330    3374  -2
   3  13   1   24330    3374   1
   5 -13  -1   33382    3498  -2
   4  13   1   33382    3498   1
   6 -13  -1    6377    2575  -2
   5  13   1    6377    2575   1
   7 -13  -1    5994    2371  -2
   6  13   1    5994    2371   1
   8 -13  -1    3800    2613  -2
   7  13   1    3800    2613   1
   9 -13  -1    6915    2955  -2
   8  13   1    6915    2955   1
  10 -13  -1   23661    4098  -2
   9  13   1   23661    4098   1
  11 -13  -1   16860    3539  -2
  10  13   1   16860    3539   1
  12 -13  -1    -789    3168  -2
  11  13   1    -789    3168   1
  13 -13  -1    3714    3228  -2
  12  13   1    3714    3228   1
  14 -13  -1   24040    4162  -2
  13  13   1   24040    4162   1
  15 -13  -1    1764    3326  -2
  14  13   1    1764    3326   1
  16 -13  -1    1795    3960  -2
  15  13   1    1795    3960   1
  16  13   1    4106    3768   1
  17  13   1    9411    5173   1
  18  13   1    -697    3386   1
 -18  14   1   46725    6900   1
 -17  14   1    -964    4092   1
 -15 -14  -1   63061    7121  -2
 -16  14   1   63061    7121   1
 -14 -14  -1   -4630    4918  -2
 -15  14   1   -4630    4918   1
 -13 -14  -1  102800    8039  -2
 -14  14   1  102800    8039   1
 -12 -14  -1    9384    4534  -2
 -13  14   1    9384    4534   1
 -11 -14  -1  113171    8701  -2
 -12  14   1  113171    8701   1
 -10 -14  -1   38521    5732  -2
 -11  14   1   38521    5732   1
  -9 -14  -1  181818   27618  -2
 -10  14   1  181818   27618   1
  -8 -14  -1   -1081    4366  -2
  -9  14   1   -1081    4366   1
  -7 -14  -1  278352   10690  -2
  -8  14   1  278352   10690   1
  -6 -14  -1    4122    3789  -2
  -7  14   1    4122    3789   1
  -5 -14  -1  109829    9373  -2
  -6  14   1  109829    9373   1
  -4 -14  -1   37064    5613  -2
  -5  14   1   37064    5613   1
  -3 -14  -1  109409   10304  -2
  -4  14   1  109409   10304   1
  -2 -14  -1  139329   10141  -2
  -3  14   1  139329   10141   1
  -1 -14  -1  145196    8208  -2
  -2  14   1  145196    8208   1
   0 -14  -1   38121    4771  -2
  -1  14   1   38121    4771   1
   1 -14  -1  112111    7427  -2
   0  14   1  112111    7427   1
   2 -14  -1   46009    5105  -2
   1  14   1   46009    5105   1
   3 -14  -1   11666    3086  -2
   2  14   1   11666    3086   1
   4 -14  -1   25887    4650  -2
   3  14   1   25887    4650   1
   5 -14  -1    3982    2506  -2
   4  14   1    3982    2506   1
   6 -14  -1   17706    3293  -2
   5  14   1   17706    3293   1
   7 -14  -1   20578    9736  -2
   6  14   1   20578    9736   1
   8 -14  -1   58404    5576  -2
   7  14   1   58404    5576   1
   9 -14  -1   63209    5141  -2
   8  14   1   63209    5141   1
  10 -14  -1   11514    3064  -2
   9  14   1   11514    3064   1
  11 -14  -1   35214    4166  -2
  10  14   1   35214    4166   1
  12 -14  -1   59757    6468  -2
  11  14   1   59757    6468   1
  13 -14  -1    8925    3665  -2
  12  14   1    8925    3665   1
  14 -14  -1   24394    3555  -2
  13  14   1   24394    3555   1
  15 -14  -1   12774    3124  -2
  14  14   1   12774    3124   1
  16 -14  -1    9209    3036  -2
  15  14   1    9209    3036   1
  16  14   1   -2571    2947   1
  17  14   1   14728    3658   1
 -17  15   1   16878    9957   1
 -15 -15  -1   27532    5543  -2
 -16  15   1   27532    5543   1
 -14 -15  -1   41182    9373  -2
 -15  15   1   41182    9373   1
 -13 -15  -1   54755    6478  -2
 -14  15   1   54755    6478   1
 -12 -15  -1   71352   10076  -2
 -13  15   1   71352   10076   1
 -11 -15  -1  100007   10177  -2
 -12  15   1  100007   10177   1
 -10 -15  -1   95255    8539  -2
 -11  15   1   95255    8539   1
  -9 -15  -1   14572    4578  -2
 -10  15   1   14572    4578   1
  -8 -15  -1   46887    5907  -2
  -9  15   1   46887    5907   1
  -7 -15  -1  128822    8674  -2
  -8  15   1  128822    8674   1
  -6 -15  -1   42516    9495  -2
  -7  15   1   42516    9495   1
  -5 -15  -1  448373   13636  -2
  -6  15   1  448373   13636   1
  -4 -15  -1   54604    7856  -2
  -5  15   1   54604    7856   1
  -3 -15  -1  431271   13362  -2
  -4  15   1  431271   13362   1
  -2 -15  -1   23849    4027  -2
  -3  15   1   23849    4027   1
  -1 -15  -1  166169    9663  -2
  -2  15   1  166169    9663   1
   0 -15  -1   10594    4005  -2
  -1  15   1   10594    4005   1
   1 -15  -1   67999    6476  -2
   0  15   1   67999    6476   1
   2 -15  -1   22747    4382  -2
   1  15   1   22747    4382   1
   3 -15  -1  262592   10051  -2
   2  15   1  262592   10051   1
   4 -15  -1   43513    7776  -2
   3  15   1   43513    7776   1
   5 -15  -1  633480   15698  -2
   4  15   1  633480   15698   1
   6 -15  -1   45806    4886  -2
   5  15   1   45806    4886   1
   7 -15  -1  647905   16520  -2
   6  15   1  647905   16520   1
   8 -15  -1    5915    4058  -2
   7  15   1    5915    4058   1
   9 -15  -1  219574   10173  -2
   8  15   1  219574   10173   1
  10 -15  -1   -3611    3611  -2
   9  15   1   -3611    3611   1
  11 -15  -1  198819   10037  -2
  10  15   1  198819   10037   1
  12 -15  -1    6484    3850  -2
  11  15   1    6484    3850   1
  13 -15  -1  244441   14672  -2
  12  15   1  244441   14672   1
  14 -15  -1    9896    3968  -2
  13  15   1    9896    3968   1
  15 -15  -1  228733    9627  -2
  14  15   1  228733    9627   1
  16 -15  -1   -1343    3188  -2
  15  15   1   -1343    3188   1
  16  15   1  141153    8041   1
 -15 -16  -1  105237   12057  -2
 -16  16   1  105237   12057   1
 -14 -16  -1    -441    4376  -2
 -15  16   1    -441    4376   1
 -13 -16  -1   91640    8425  -2
 -14  16   1   91640    8425   1
 -12 -16  -1    9690    5791  -2
 -13  16   1    9690    5791   1
 -11 -16  -1  131718    9833  -2
 -12  16   1  131718    9833   1
 -10 -16  -1      39    3994  -2
 -11  16   1      39    3994   1
  -9 -16  -1   98727    8033  -2
 -10  16   1   98727    8033   1
  -8 -16  -1    1296    3911  -2
  -9  16   1    1296    3911   1
  -7 -16  -1  103283    8708  -2
  -8  16   1  103283    8708   1
  -6 -16  -1    -575    4417  -2
  -7  16   1    -575    4417   1
  -5 -16  -1  106254    8836  -2
  -6  16   1  106254    8836   1
  -4 -16  -1   61694    6792  -2
  -5  16   1   61694    6792   1
  -3 -16  -1  217057   11624  -2
  -4  16   1  217057   11624   1
  -2 -16  -1   43454    5730  -2
  -3  16   1   43454    5730   1
  -1 -16  -1  150316    9367  -2
  -2  16   1  150316    9367   1
   0 -16  -1    3414    3776  -2
  -1  16   1    3414    3776   1
   1 -16  -1   79844    7093  -2
   0  16   1   79844    7093   1
   2 -16  -1    6431    3755  -2
   1  16   1    6431    3755   1
   3 -16  -1   27967    5320  -2
   2  16   1   27967    5320   1
   4 -16  -1   37786    5916  -2
   3  16   1   37786    5916   1
   5 -16  -1   58941    6160  -2
   4  16   1   58941    6160   1
   6 -16  -1    3015    3742  -2
   5  16   1    3015    3742   1
   7 -16  -1   38085    5907  -2
   6  16   1   38085    5907   1
   8 -16  -1    3441    5049  -2
   7  16   1    3441    5049   1
   9 -16  -1   14169    4665  -2
   8  16   1   14169    4665   1
  10 -16  -1   50539   10878  -2
   9  16   1   50539   10878   1
  11 -16  -1    7528    4210  -2
  10  16   1    7528    4210   1
  12 -16  -1   65100    6985  -2
  11  16   1   65100    6985   1
  13 -16  -1   -1412    4213  -2
  12  16   1   -1412    4213   1
  14 -16  -1   23062    5482  -2
  13  16   1   23062    5482   1
  15 -16  -1    5294    4469  -2
  14  16   1    5294    4469   1
  16 -16  -1    6296    4403  -2
  15  16   1    6296    4403   1
 -14 -17  -1    1150    4411  -2
 -15  17   1    1150    4411   1
 -13 -17  -1     425    4190  -2
 -14  17   1     425    4190   1
 -12 -17  -1   -2322    4041  -2
 -13  17   1   -2322    4041   1
 -11 -17  -1    5986    4707  -2
 -12  17   1    5986    4707   1
 -10 -17  -1    6880    6142  -2
 -11  17   1    6880    6142   1
  -9 -17  -1    5624    4457  -2
 -10  17   1    5624    4457   1
  -8 -17  -1    4511    4388  -2
  -9  17   1    4511    4388   1
  -7 -17  -1   50659    6802  -2
  -8  17   1   50659    6802   1
  -6 -17  -1    7228    4485  -2
  -7  17   1    7228    4485   1
  -5 -17  -1   81731    7645  -2
  -6  17   1   81731    7645   1
  -4 -17  -1    2212    3971  -2
  -5  17   1    2212    3971   1
  -3 -17  -1   28020    5549  -2
  -4  17   1   28020    5549   1
  -2 -17  -1   44272    6228  -2
  -3  17   1   44272    6228   1
  -1 -17  -1    4115    6147  -2
  -2  17   1    4115    6147   1
   0 -17  -1   82021    8427  -2
  -1  17   1   82021    8427   1
   1 -17  -1   20692    5190  -2
   0  17   1   20692    5190   1
   2 -17  -1   19218    4988  -2
   1  17   1   19218    4988   1
   3 -17  -1    4737    4016  -2
   2  17   1    4737    4016   1
   4 -17  -1    -820    3535  -2
   3  17   1    -820    3535   1
   5 -17  -1   36614    5844  -2
   4  17   1   36614    5844   1
   6 -17  -1   14969    6266  -2
   5  17   1   14969    6266   1
   7 -17  -1   92899    8022  -2
   6  17   1   92899    8022   1
   8 -17  -1   34191    5864  -2
   7  17   1   34191    5864   1
   9 -17  -1   27580    5669  -2
   8  17   1   27580    5669   1
  10 -17  -1   59178    7289  -2
   9  17   1   59178    7289   1
  11 -17  -1    -565    4652  -2
  10  17   1    -565    4652   1
  12 -17  -1   15563    5076  -2
  11  17   1   15563    5076   1
  13 -17  -1    2157    4355  -2
  12  17   1    2157    4355   1
  14 -17  -1     382    5002  -2
  13  17   1     382    5002   1
  15 -17  -1    4626    4189  -2
  14  17   1    4626    4189   1
 -12 -18  -1   16417    5650  -2
 -13  18   1   16417    5650   1
 -11 -18  -1   48626    6736  -2
 -12  18   1   48626    6736   1
 -10 -18  -1   13150    5066  -2
 -11  18   1   13150    5066   1
  -9 -18  -1   76964    8148  -2
 -10  18   1   76964    8148   1
  -8 -18  -1    6582    4931  -2
  -9  18   1    6582    4931   1
  -7 -18  -1   81503    8088  -2
  -8  18   1   81503    8088   1
  -6 -18  -1    9783    5167  -2
  -7  18   1    9783    5167   1
  -5 -18  -1   42096    6460  -2
  -6  18   1   42096    6460   1
  -4 -18  -1   20793    5253  -2
  -5  18   1   20793    5253   1
  -3 -18  -1    5325    4271  -2
  -4  18   1    5325    4271   1
  -2 -18  -1   58895    7172  -2
  -3  18   1   58895    7172   1
  -1 -18  -1   14441    6235  -2
  -2  18   1   14441    6235   1
   0 -18  -1   11071    4667  -2
  -1  18   1   11071    4667   1
   1 -18  -1   16580    5542  -2
   0  18   1   16580    5542   1
   2 -18  -1    3587    4192  -2
   1  18   1    3587    4192   1
   3 -18  -1   38417    5785  -2
   2  18   1   38417    5785   1
   4 -18  -1    4859    5572  -2
   3  18   1    4859    5572   1
   5 -18  -1   32076    5832  -2
   4  18   1   32076    5832   1
   6 -18  -1    1124    4127  -2
   5  18   1    1124    4127   1
   7 -18  -1    2237    4428  -2
   6  18   1    2237    4428   1
   8 -18  -1    3417    4335  -2
   7  18   1    3417    4335   1
   9 -18  -1   -2610    4880  -2
   8  18   1   -2610    4880   1
  10 -18  -1   -1313    4432  -2
   9  18   1   -1313    4432   1
  11 -18  -1    -382    6703  -2
  10  18   1    -382    6703   1
  12 -18  -1    1805    4508  -2
  11  18   1    1805    4508   1
  13 -18  -1    4153    4327  -2
  12  18   1    4153    4327   1
 -11 -19  -1   40209    6896  -2
 -12  19   1   40209    6896   1
 -10 -19  -1   11508    5125  -2
 -11  19   1   11508    5125   1
  -9 -19  -1   42856    7250  -2
 -10  19   1   42856    7250   1
  -8 -19  -1   -4110    4110  -2
  -9  19   1   -4110    4110   1
  -7 -19  -1   57177    7305  -2
  -8  19   1   57177    7305   1
  -6 -19  -1   14139    5098  -2
  -7  19   1   14139    5098   1
  -5 -19  -1  150117   18458  -2
  -6  19   1  150117   18458   1
  -4 -19  -1   27636    5847  -2
  -5  19   1   27636    5847   1
  -3 -19  -1  165334   11616  -2
  -4  19   1  165334   11616   1
  -2 -19  -1    8552    4524  -2
  -3  19   1    8552    4524   1
  -1 -19  -1  142188   11125  -2
  -2  19   1  142188   11125   1
   0 -19  -1   15023    6410  -2
  -1  19   1   15023    6410   1
   1 -19  -1  197291   11501  -2
   0  19   1  197291   11501   1
   2 -19  -1   14064    5958  -2
   1  19   1   14064    5958   1
   3 -19  -1  210823   20931  -2
   2  19   1  210823   20931   1
   4 -19  -1   10846    4815  -2
   3  19   1   10846    4815   1
   5 -19  -1  268058   17583  -2
   4  19   1  268058   17583   1
   6 -19  -1   31082    6745  -2
   5  19   1   31082    6745   1
   7 -19  -1  170919   13536  -2
   6  19   1  170919   13536   1
   8 -19  -1   29563    6093  -2
   7  19   1   29563    6093   1
   9 -19  -1  105367   10164  -2
   8  19   1  105367   10164   1
  10 -19  -1   16484    5256  -2
   9  19   1   16484    5256   1
  11 -19  -1  165494   11149  -2
  10  19   1  165494   11149   1
  12 -19  -1    7070    4694  -2
  11  19   1    7070    4694   1
  -9 -20  -1   65860   10463  -2
 -10  20   1   65860   10463   1
  -8 -20  -1   -4316    4325  -2
  -9  20   1   -4316    4325   1
  -7 -20  -1   35907    6499  -2
  -8  20   1   35907    6499   1
  -6 -20  -1   15388    5410  -2
  -7  20   1   15388    5410   1
  -5 -20  -1   36977    6784  -2
  -6  20   1   36977    6784   1
  -4 -20  -1   12629    5175  -2
  -5  20   1   12629    5175   1
  -3 -20  -1  115158    9866  -2
  -4  20   1  115158    9866   1
  -2 -20  -1   11341    5188  -2
  -3  20   1   11341    5188   1
  -1 -20  -1  136337   14913  -2
  -2  20   1  136337   14913   1
   0 -20  -1    6942    7197  -2
  -1  20   1    6942    7197   1
   1 -20  -1   64459   16901  -2
   0  20   1   64459   16901   1
   2 -20  -1   43039    7931  -2
   1  20   1   43039    7931   1
   3 -20  -1   78794    8368  -2
   2  20   1   78794    8368   1
   4 -20  -1   20015    6669  -2
   3  20   1   20015    6669   1
   5 -20  -1   45183    7282  -2
   4  20   1   45183    7282   1
   6 -20  -1    1598    4577  -2
   5  20   1    1598    4577   1
   7 -20  -1   26224    5991  -2
   6  20   1   26224    5991   1
   8 -20  -1    -415    4685  -2
   7  20   1    -415    4685   1
   9 -20  -1    3780    7294  -2
   8  20   1    3780    7294   1
  10 -20  -1   11537    6695  -2
   9  20   1   11537    6695   1
  -5 -21  -1   11690    5828  -2
  -6  21   1   11690    5828   1
  -4 -21  -1   14640    5848  -2
  -5  21   1   14640    5848   1
  -3 -21  -1   24983    8954  -2
  -4  21   1   24983    8954   1
  -2 -21  -1    7686    5357  -2
  -3  21   1    7686    5357   1
  -1 -21  -1    7965    7569  -2
  -2  21   1    7965    7569   1
   0 -21  -1     685    4369  -2
  -1  21   1     685    4369   1
   1 -21  -1   43561    7242  -2
   0  21   1   43561    7242   1
   2 -21  -1   31254    8650  -2
   1  21   1   31254    8650   1
   3 -21  -1   36970    7204  -2
   2  21   1   36970    7204   1
   4 -21  -1   13549    7193  -2
   3  21   1   13549    7193   1
   5 -21  -1   -4497    5518  -2
   4  21   1   -4497    5518   1
   6 -21  -1   19777    8299  -2
   5  21   1   19777    8299   1
 -24   0   2   55813   11681   1
 -23   0   2   22638   13068   1
 -22   0   2  133357   12585   1
 -21   0   2    5169    5938   1
 -20   0   2   80150    6638   1
 -19   0   2   13049    6857   1
 -18   0   2   25224    4248   1
 -17   0   2   23847    5839   1
 -14   0  -2   79598    9537  -2
 -16   0   2   79598    9537   1
 -13   0  -2  232484    8247  -2
 -15   0   2  232484    8247   1
 -12   0  -2   82828    5425  -2
 -14   0   2   82828    5425   1
 -11   0  -2  147352    6448  -2
 -13   0   2  147352    6448   1
 -10   0  -2   50742    5374  -2
 -12   0   2   50742    5374   1
  -9   0  -2  264505   11577  -2
 -11   0   2  264505   11577   1
  -8   0  -2  195455   11536  -2
 -10   0   2  195455   11536   1
  -7   0  -2   20212    2733  -2
  -9   0   2   20212    2733   1
  -6   0  -2  468804    9596  -2
  -8   0   2  468804    9596   1
  -5   0  -2  141698    7188  -2
  -7   0   2  141698    7188   1
  -4   0  -2   28172    3248  -2
  -6   0   2   28172    3248   1
  -3   0  -2  536081    9605  -2
  -5   0   2  536081    9605   1
  -2   0  -2  195640    6805  -2
  -4   0   2  195640    6805   1
  -1   0  -2    4382    1221  -2
  -3   0   2    4382    1221   1
   0   0  -2 1189235   16079  -2
  -2   0   2 1189235   16079   1
   1   0  -2   15498    1624  -2
  -1   0   2   15498    1624   1
   2   0  -2 1679988   42421  -2
   0   0   2 1679988   42421   1
   3   0  -2   16521     954  -2
   1   0   2   16521     954   1
   4   0  -2   72823    1716  -2
   2   0   2   72823    1716   1
   5   0  -2   96630    2774  -2
   3   0   2   96630    2774   1
   6   0  -2   71828    2373  -2
   4   0   2   71828    2373   1
   7   0  -2  429465    6863  -2
   5   0   2  429465    6863   1
   8   0  -2  103932    5238  -2
   6   0   2  103932    5238   1
  10   0  -2  696329   11305  -2
   8   0   2  696329   11305   1
  11   0  -2  738846   12190  -2
   9   0   2  738846   12190   1
  12   0  -2  522679   15976  -2
  10   0   2  522679   15976   1
  13   0  -2  114762    6803  -2
  11   0   2  114762    6803   1
  14   0  -2  356144   12020  -2
  12   0   2  356144   12020   1
  15   0  -2  153314    8353  -2
  13   0   2  153314    8353   1
  16   0  -2  146835    6957  -2
  14   0   2  146835    6957   1
  15   0   2   10177    4380   1
  16   0   2  364158    9515   1
  17   0   2   46066    9745   1
  18   0   2  282724   13794   1
  19   0   2   13114    4248   1
  20   0   2  154196    9910   1
  21   0   2    2382    4115   1
  22   0   2   47140   19146   1
 -24   1   2   84772    7494   1
 -23   1   2    9433    4879   1
 -22   1   2  134277    9745   1
 -21   1   2   10061    4363   1
 -20   1   2  190454    9968   1
 -19   1   2   10004    3521   1
 -18   1   2   23735    3235   1
 -17   1   2      66    2205   1
 -14  -1  -2  143603    6638  -2
 -16   1   2  143603    6638   1
 -13  -1  -2   12575    2736  -2
 -15   1   2   12575    2736   1
 -12  -1  -2  531496    8707  -2
 -14   1   2  531496    8707   1
 -11  -1  -2    7476    2796  -2
 -13   1   2    7476    2796   1
 -10  -1  -2  643736    9346  -2
 -12   1   2  643736    9346   1
  -9  -1  -2  179669    4628  -2
 -11   1   2  179669    4628   1
  -8  -1  -2  468203    7309  -2
 -10   1   2  468203    7309   1
  -7  -1  -2  299702    5465  -2
  -9   1   2  299702    5465   1
  -6  -1  -2  680900    8697  -2
  -8   1   2  680900    8697   1
  -5  -1  -2  217004    4962  -2
  -7   1   2  217004    4962   1
  -4  -1  -2  404829    6104  -2
  -6   1   2  404829    6104   1
  -3  -1  -2  948434   10316  -2
  -5   1   2  948434   10316   1
  -2  -1  -2 1602336   18045  -2
  -4   1   2 1602336   18045   1
  -1  -1  -2   15475    1127  -2
  -3   1   2   15475    1127   1
   0  -1  -2  946250    9358  -2
  -2   1   2  946250    9358   1
   1  -1  -2    1016     550  -2
  -1   1   2    1016     550   1
   2  -1  -2  881666    8385  -2
   0   1   2  881666    8385   1
   3  -1  -2   32863    1606  -2
   1   1   2   32863    1606   1
   5  -1  -2 1090291   14712  -2
   3   1   2 1090291   14712   1
   6  -1  -2  436981    7142  -2
   4   1   2  436981    7142   1
   7  -1  -2  392748    4639  -2
   5   1   2  392748    4639   1
   8  -1  -2  979236    9847  -2
   6   1   2  979236    9847   1
   9  -1  -2  492843    5947  -2
   7   1   2  492843    5947   1
  10  -1  -2  172976    7240  -2
   8   1   2  172976    7240   1
  11  -1  -2  110626    3017  -2
   9   1   2  110626    3017   1
  12  -1  -2  297662    4925  -2
  10   1   2  297662    4925   1
  13  -1  -2    1318    1561  -2
  11   1   2    1318    1561   1
  14  -1  -2  210085    4464  -2
  12   1   2  210085    4464   1
  15  -1  -2   27160    2325  -2
  13   1   2   27160    2325   1
  16  -1  -2  230212    5042  -2
  14   1   2  230212    5042   1
  15   1   2   26579    2941   1
  16   1   2   39555    3968   1
  17   1   2    3719    3429   1
  18   1   2   30766    2837   1
  19   1   2    5030    2306   1
  20   1   2   16659    2723   1
  21   1   2   14335    2616   1
  22   1   2    6422    2705   1
 -24   2   2    5171    4595   1
 -23   2   2    5364    4275   1
 -22   2   2    3688    3992   1
 -21   2   2   -2656    2656   1
 -20   2   2    4982    3091   1
 -19   2   2   -1010    3056   1
 -18   2   2   13430    3744   1
 -17   2   2   -1934    2112   1
 -14  -2  -2   34613    3321  -2
 -16   2   2   34613    3321   1
 -13  -2  -2    3930    1972  -2
 -15   2   2    3930    1972   1
 -12  -2  -2    1530    1907  -2
 -14   2   2    1530    1907   1
 -11  -2  -2   11633    2150  -2
 -13   2   2   11633    2150   1
 -10  -2  -2    2657    1864  -2
 -12   2   2    2657    1864   1
  -9  -2  -2   64272    4007  -2
 -11   2   2   64272    4007   1
  -8  -2  -2  222643    5087  -2
 -10   2   2  222643    5087   1
  -7  -2  -2   44156    2591  -2
  -9   2   2   44156    2591   1
  -6  -2  -2    -871    1398  -2
  -8   2   2    -871    1398   1
  -5  -2  -2  227447    5562  -2
  -7   2   2  227447    5562   1
  -4  -2  -2   28881    2684  -2
  -6   2   2   28881    2684   1
  -3  -2  -2  131522    3356  -2
  -5   2   2  131522    3356   1
  -2  -2  -2   89115    2552  -2
  -4   2   2   89115    2552   1
  -1  -2  -2  171497    3696  -2
  -3   2   2  171497    3696   1
   0  -2  -2   40790    1561  -2
  -2   2   2   40790    1561   1
   1  -2  -2   33265    1344  -2
  -1   2   2   33265    1344   1
   2  -2  -2   21016    1040  -2
   0   2   2   21016    1040   1
   3  -2  -2  118633    1903  -2
   1   2   2  118633    1903   1
   4  -2  -2   67851    2897  -2
   2   2   2   67851    2897   1
   5  -2  -2  193136    7098  -2
   3   2   2  193136    7098   1
   6  -2  -2   42648    2499  -2
   4   2   2   42648    2499   1
   7  -2  -2  128631    3968  -2
   5   2   2  128631    3968   1
   8  -2  -2    -313     954  -2
   6   2   2    -313     954   1
   9  -2  -2   13432    1642  -2
   7   2   2   13432    1642   1
  10  -2  -2   56949    6255  -2
   8   2   2   56949    6255   1
  11  -2  -2   11456    1733  -2
   9   2   2   11456    1733   1
  12  -2  -2    -119    1605  -2
  10   2   2    -119    1605   1
  13  -2  -2   19716    1802  -2
  11   2   2   19716    1802   1
  14  -2  -2    4790    1757  -2
  12   2   2    4790    1757   1
  15  -2  -2   17682    2023  -2
  13   2   2   17682    2023   1
  16  -2  -2   25988    2389  -2
  14   2   2   25988    2389   1
  15   2   2    -112    1698   1
  16   2   2    3529    1964   1
  17   2   2   41118    3717   1
  18   2   2   15605    2803   1
  19   2   2    7488    2601   1
  20   2   2    4257    2331   1
  21   2   2    1402    2111   1
  22   2   2     755    1880   1
 -24   3   2   40850    7780   1
 -23   3   2    9301    4516   1
 -22   3   2   58689    6473   1
 -21   3   2     125    3034   1
 -20   3   2   54878    4811   1
 -19   3   2    2055    4115   1
 -18   3   2  119950    6168   1
 -17   3   2    8920    2683   1
 -14  -3  -2  172065    6058  -2
 -16   3   2  172065    6058   1
 -13  -3  -2     611    2291  -2
 -15   3   2     611    2291   1
 -12  -3  -2  302989    6477  -2
 -14   3   2  302989    6477   1
 -11  -3  -2     643    1770  -2
 -13   3   2     643    1770   1
 -10  -3  -2  470861    7758  -2
 -12   3   2  470861    7758   1
  -9  -3  -2     566    2806  -2
 -11   3   2     566    2806   1
  -8  -3  -2 1237019   14331  -2
 -10   3   2 1237019   14331   1
  -7  -3  -2    4647    1636  -2
  -9   3   2    4647    1636   1
  -6  -3  -2  808361   10000  -2
  -8   3   2  808361   10000   1
  -5  -3  -2  142324    3583  -2
  -7   3   2  142324    3583   1
  -4  -3  -2  170717    4040  -2
  -6   3   2  170717    4040   1
  -3  -3  -2   15907    1524  -2
  -5   3   2   15907    1524   1
  -2  -3  -2 1316590   13473  -2
  -4   3   2 1316590   13473   1
  -1  -3  -2  177597    4742  -2
  -3   3   2  177597    4742   1
   0  -3  -2   99541    2437  -2
  -2   3   2   99541    2437   1
   1  -3  -2    2886    1151  -2
  -1   3   2    2886    1151   1
   2  -3  -2   25199    1613  -2
   0   3   2   25199    1613   1
   3  -3  -2  112850    2260  -2
   1   3   2  112850    2260   1
   4  -3  -2 1654813   15588  -2
   2   3   2 1654813   15588   1
   5  -3  -2   99316    2006  -2
   3   3   2   99316    2006   1
   6  -3  -2   74076    1753  -2
   4   3   2   74076    1753   1
   7  -3  -2  177948    3528  -2
   5   3   2  177948    3528   1
   8  -3  -2  726811    7905  -2
   6   3   2  726811    7905   1
   9  -3  -2   17132    5917  -2
   7   3   2   17132    5917   1
  10  -3  -2  848269    9395  -2
   8   3   2  848269    9395   1
  11  -3  -2    -785    1464  -2
   9   3   2    -785    1464   1
  12  -3  -2  254915    4641  -2
  10   3   2  254915    4641   1
  13  -3  -2    1174    1369  -2
  11   3   2    1174    1369   1
  14  -3  -2  173527    4284  -2
  12   3   2  173527    4284   1
  15  -3  -2    3700    1662  -2
  13   3   2    3700    1662   1
  16  -3  -2   11947    2260  -2
  14   3   2   11947    2260   1
  15   3   2   14218    2174   1
  16   3   2   20637    2384   1
  17   3   2   23488    2689   1
  18   3   2   18598    2953   1
  19   3   2   20563    2863   1
  20   3   2   21656    3160   1
  21   3   2    4660    2875   1
  22   3   2    3689    4247   1
 -24   4   2   29095    5311   1
 -23   4   2   10709    4605   1
 -22   4   2   36554    5090   1
 -21   4   2   86706    7570   1
 -20   4   2   32255    4339   1
 -19   4   2  160000    9102   1
 -18   4   2   25534    3268   1
 -17   4   2   87798    4722   1
 -14  -4  -2   90489    4433  -2
 -16   4   2   90489    4433   1
 -13  -4  -2    1909    2004  -2
 -15   4   2    1909    2004   1
 -12  -4  -2   94720    4686  -2
 -14   4   2   94720    4686   1
 -11  -4  -2   20124    2435  -2
 -13   4   2   20124    2435   1
 -10  -4  -2  105430    5482  -2
 -12   4   2  105430    5482   1
  -9  -4  -2   72701    3765  -2
 -11   4   2   72701    3765   1
  -8  -4  -2   44763    3889  -2
 -10   4   2   44763    3889   1
  -7  -4  -2   39214    2562  -2
  -9   4   2   39214    2562   1
  -6  -4  -2  159973    6011  -2
  -8   4   2  159973    6011   1
  -5  -4  -2   50053    2519  -2
  -7   4   2   50053    2519   1
  -4  -4  -2   57397    4016  -2
  -6   4   2   57397    4016   1
  -3  -4  -2  202619    5752  -2
  -5   4   2  202619    5752   1
  -2  -4  -2   78800    4553  -2
  -4   4   2   78800    4553   1
  -1  -4  -2   57290    2672  -2
  -3   4   2   57290    2672   1
   0  -4  -2  586899    7074  -2
  -2   4   2  586899    7074   1
   1  -4  -2   30076    1704  -2
  -1   4   2   30076    1704   1
   2  -4  -2  969745   10251  -2
   0   4   2  969745   10251   1
   3  -4  -2   75955    2365  -2
   1   4   2   75955    2365   1
   4  -4  -2  224165    3671  -2
   2   4   2  224165    3671   1
   5  -4  -2  248850    4079  -2
   3   4   2  248850    4079   1
   6  -4  -2  202490    3273  -2
   4   4   2  202490    3273   1
   7  -4  -2   92209    3346  -2
   5   4   2   92209    3346   1
   8  -4  -2  695497    7899  -2
   6   4   2  695497    7899   1
   9  -4  -2   18661    1737  -2
   7   4   2   18661    1737   1
  10  -4  -2  444018    5984  -2
   8   4   2  444018    5984   1
  11  -4  -2   45660    3619  -2
   9   4   2   45660    3619   1
  12  -4  -2  290729    4937  -2
  10   4   2  290729    4937   1
  13  -4  -2    6486    1554  -2
  11   4   2    6486    1554   1
  14  -4  -2  321137    5605  -2
  12   4   2  321137    5605   1
  15  -4  -2   -1484    2262  -2
  13   4   2   -1484    2262   1
  16  -4  -2  348978    6200  -2
  14   4   2  348978    6200   1
  15   4   2    7230    2033   1
  16   4   2  314247    6182   1
  17   4   2   11150    2087   1
  18   4   2  123377    4528   1
  19   4   2   11792    4130   1
  20   4   2   91295    5764   1
  21   4   2    3385    4388   1
  22   4   2   98260   11120   1
 -24   5   2   32746    5719   1
 -23   5   2   15865    5119   1
 -22   5   2   87486    6385   1
 -21   5   2   51330    5297   1
 -20   5   2   96330    7734   1
 -19   5   2   35101    4049   1
 -18   5   2  322717    8852   1
 -17   5   2   12770    2979   1
 -14  -5  -2  529883    9383  -2
 -16   5   2  529883    9383   1
 -13  -5  -2   21281    2816  -2
 -15   5   2   21281    2816   1
 -12  -5  -2  505125    8652  -2
 -14   5   2  505125    8652   1
 -11  -5  -2    2270    2243  -2
 -13   5   2    2270    2243   1
 -10  -5  -2  811586   11178  -2
 -12   5   2  811586   11178   1
  -9  -5  -2   30196    2465  -2
 -11   5   2   30196    2465   1
  -8  -5  -2  480725    7719  -2
 -10   5   2  480725    7719   1
  -7  -5  -2   11857    2644  -2
  -9   5   2   11857    2644   1
  -6  -5  -2  771552   10009  -2
  -8   5   2  771552   10009   1
  -5  -5  -2   92652    3456  -2
  -7   5   2   92652    3456   1
  -4  -5  -2 1220134   13553  -2
  -6   5   2 1220134   13553   1
  -3  -5  -2  472363    6702  -2
  -5   5   2  472363    6702   1
  -2  -5  -2  920832   10537  -2
  -4   5   2  920832   10537   1
  -1  -5  -2  118144    3140  -2
  -3   5   2  118144    3140   1
   0  -5  -2 1529352   15527  -2
  -2   5   2 1529352   15527   1
   1  -5  -2   49759    2810  -2
  -1   5   2   49759    2810   1
   2  -5  -2 1685829   16668  -2
   0   5   2 1685829   16668   1
   3  -5  -2   27428    1640  -2
   1   5   2   27428    1640   1
   4  -5  -2  881648    9626  -2
   2   5   2  881648    9626   1
   5  -5  -2  436240    5756  -2
   3   5   2  436240    5756   1
   6  -5  -2  957567   12169  -2
   4   5   2  957567   12169   1
   7  -5  -2   20963    1842  -2
   5   5   2   20963    1842   1
   8  -5  -2  391359    6652  -2
   6   5   2  391359    6652   1
   9  -5  -2   88974    3853  -2
   7   5   2   88974    3853   1
  10  -5  -2  475404    6586  -2
   8   5   2  475404    6586   1
  11  -5  -2   23302    1867  -2
   9   5   2   23302    1867   1
  12  -5  -2  627708    8160  -2
  10   5   2  627708    8160   1
  13  -5  -2     205    1473  -2
  11   5   2     205    1473   1
  14  -5  -2  537643   12266  -2
  12   5   2  537643   12266   1
  15  -5  -2   16863    2323  -2
  13   5   2   16863    2323   1
  16  -5  -2  263675    9154  -2
  14   5   2  263675    9154   1
  15   5   2   82753    3771   1
  16   5   2   24765    3126   1
  17   5   2   46758    3080   1
  18   5   2   20554    2618   1
  19   5   2   24293    3252   1
  20   5   2   13644    4790   1
  21   5   2   15142    9268   1
  22   5   2   19888    7266   1
 -23   6   2   -3706    3706   1
 -22   6   2    3486    3164   1
 -21   6   2    8945    3656   1
 -20   6   2    8382    3198   1
 -19   6   2   53917    4647   1
 -18   6   2    6607    3628   1
 -17   6   2   10243    3124   1
 -14  -6  -2    7051    2750  -2
 -16   6   2    7051    2750   1
 -13  -6  -2    5717    2282  -2
 -15   6   2    5717    2282   1
 -12  -6  -2   25404    2987  -2
 -14   6   2   25404    2987   1
 -11  -6  -2    9419    2470  -2
 -13   6   2    9419    2470   1
 -10  -6  -2    9181    2255  -2
 -12   6   2    9181    2255   1
  -9  -6  -2   33887    3066  -2
 -11   6   2   33887    3066   1
  -8  -6  -2    4530    1663  -2
 -10   6   2    4530    1663   1
  -7  -6  -2    9292    1790  -2
  -9   6   2    9292    1790   1
  -6  -6  -2   70015    3118  -2
  -8   6   2   70015    3118   1
  -5  -6  -2  106077    3817  -2
  -7   6   2  106077    3817   1
  -4  -6  -2   29040    2765  -2
  -6   6   2   29040    2765   1
  -3  -6  -2   64570    2873  -2
  -5   6   2   64570    2873   1
  -2  -6  -2  128291    3456  -2
  -4   6   2  128291    3456   1
  -1  -6  -2   29901    2047  -2
  -3   6   2   29901    2047   1
   0  -6  -2   48671    2411  -2
  -2   6   2   48671    2411   1
   1  -6  -2   11986    1448  -2
  -1   6   2   11986    1448   1
   2  -6  -2   26993    1839  -2
   0   6   2   26993    1839   1
   3  -6  -2   11331    2825  -2
   1   6   2   11331    2825   1
   4  -6  -2   23761    2297  -2
   2   6   2   23761    2297   1
   5  -6  -2   61956    3116  -2
   3   6   2   61956    3116   1
   6  -6  -2   42464    2122  -2
   4   6   2   42464    2122   1
   7  -6  -2   40070    2077  -2
   5   6   2   40070    2077   1
   8  -6  -2  151288    4560  -2
   6   6   2  151288    4560   1
   9  -6  -2   30698    2006  -2
   7   6   2   30698    2006   1
  10  -6  -2   58678    2795  -2
   8   6   2   58678    2795   1
  11  -6  -2    2633    1432  -2
   9   6   2    2633    1432   1
  12  -6  -2  105784    4678  -2
  10   6   2  105784    4678   1
  13  -6  -2   19654    2165  -2
  11   6   2   19654    2165   1
  14  -6  -2   11621    2212  -2
  12   6   2   11621    2212   1
  15  -6  -2   17315    2185  -2
  13   6   2   17315    2185   1
  16  -6  -2   50951    3327  -2
  14   6   2   50951    3327   1
  15   6   2    4016    1989   1
  16   6   2   23503    2741   1
  17   6   2    1539    2615   1
  18   6   2    1673    2053   1
  19   6   2   -2516    5755   1
  20   6   2    1797    6869   1
  21   6   2   -3319    5193   1
 -23   7   2    -562    3682   1
 -22   7   2    5029    3519   1
 -21   7   2    4474    3720   1
 -20   7   2   12347    3285   1
 -19   7   2    2511    2922   1
 -18   7   2   76811    5589   1
 -17   7   2    7955    2958   1
 -14  -7  -2  106044    6761  -2
 -16   7   2  106044    6761   1
 -13  -7  -2     243    2627  -2
 -15   7   2     243    2627   1
 -12  -7  -2  168481    6466  -2
 -14   7   2  168481    6466   1
 -11  -7  -2   34935    3192  -2
 -13   7   2   34935    3192   1
 -10  -7  -2   35875    2862  -2
 -12   7   2   35875    2862   1
  -9  -7  -2   98707    4380  -2
 -11   7   2   98707    4380   1
  -8  -7  -2   44725    3332  -2
 -10   7   2   44725    3332   1
  -7  -7  -2   90602    3885  -2
  -9   7   2   90602    3885   1
  -6  -7  -2   95238    3796  -2
  -8   7   2   95238    3796   1
  -5  -7  -2    1908    1535  -2
  -7   7   2    1908    1535   1
  -4  -7  -2  433122    7006  -2
  -6   7   2  433122    7006   1
  -3  -7  -2  100806    3731  -2
  -5   7   2  100806    3731   1
  -2  -7  -2  271111    5218  -2
  -4   7   2  271111    5218   1
  -1  -7  -2    2174    1406  -2
  -3   7   2    2174    1406   1
   0  -7  -2  464780    6835  -2
  -2   7   2  464780    6835   1
   1  -7  -2    2060    1331  -2
  -1   7   2    2060    1331   1
   2  -7  -2  172174    3914  -2
   0   7   2  172174    3914   1
   3  -7  -2    8383    1496  -2
   1   7   2    8383    1496   1
   4  -7  -2  144423    3581  -2
   2   7   2  144423    3581   1
   5  -7  -2   10220    1570  -2
   3   7   2   10220    1570   1
   6  -7  -2  394094    6045  -2
   4   7   2  394094    6045   1
   7  -7  -2   71877    5066  -2
   5   7   2   71877    5066   1
   8  -7  -2  126066    3652  -2
   6   7   2  126066    3652   1
   9  -7  -2    8210    1624  -2
   7   7   2    8210    1624   1
  10  -7  -2   24011    2099  -2
   8   7   2   24011    2099   1
  11  -7  -2   24075    2068  -2
   9   7   2   24075    2068   1
  12  -7  -2   59068    2995  -2
  10   7   2   59068    2995   1
  13  -7  -2   28055    2303  -2
  11   7   2   28055    2303   1
  14  -7  -2   18742    2856  -2
  12   7   2   18742    2856   1
  15  -7  -2      94    1897  -2
  13   7   2      94    1897   1
  16  -7  -2   76099    3615  -2
  14   7   2   76099    3615   1
  15   7   2    3549    2485   1
  16   7   2   39009    3148   1
  17   7   2    5355    2265   1
  18   7   2   -3251    3251   1
  19   7   2    6080    6415   1
  20   7   2   12992    9185   1
  21   7   2   10347    6837   1
 -23   8   2   15171    6046   1
 -22   8   2   15865    4716   1
 -21   8   2   52672    5317   1
 -20   8   2   60833    5230   1
 -19   8   2   43674    5005   1
 -18   8   2   76549    6387   1
 -17   8   2   56533    5542   1
 -14  -8  -2  168698    6791  -2
 -16   8   2  168698    6791   1
 -13  -8  -2    2757    2653  -2
 -15   8   2    2757    2653   1
 -12  -8  -2   52764    4126  -2
 -14   8   2   52764    4126   1
 -11  -8  -2    5636    2328  -2
 -13   8   2    5636    2328   1
 -10  -8  -2   14502    3003  -2
 -12   8   2   14502    3003   1
  -9  -8  -2    -827    1689  -2
 -11   8   2    -827    1689   1
  -8  -8  -2   42528    2877  -2
 -10   8   2   42528    2877   1
  -7  -8  -2  145634    8966  -2
  -9   8   2  145634    8966   1
  -6  -8  -2   85880    3683  -2
  -8   8   2   85880    3683   1
  -5  -8  -2   84457    6106  -2
  -7   8   2   84457    6106   1
  -4  -8  -2  271805    7639  -2
  -6   8   2  271805    7639   1
  -3  -8  -2   42740    2742  -2
  -5   8   2   42740    2742   1
  -2  -8  -2   15119    1845  -2
  -4   8   2   15119    1845   1
  -1  -8  -2   18373    2053  -2
  -3   8   2   18373    2053   1
   0  -8  -2   10253    1823  -2
  -2   8   2   10253    1823   1
   1  -8  -2   13392    2803  -2
  -1   8   2   13392    2803   1
   2  -8  -2    5379    1610  -2
   0   8   2    5379    1610   1
   3  -8  -2   14725    1852  -2
   1   8   2   14725    1852   1
   4  -8  -2  131854    3720  -2
   2   8   2  131854    3720   1
   5  -8  -2   24957    2132  -2
   3   8   2   24957    2132   1
   6  -8  -2  616330    8429  -2
   4   8   2  616330    8429   1
   7  -8  -2   52971    2704  -2
   5   8   2   52971    2704   1
   8  -8  -2  237411    4863  -2
   6   8   2  237411    4863   1
   9  -8  -2   13899    1713  -2
   7   8   2   13899    1713   1
  10  -8  -2  165776    4539  -2
   8   8   2  165776    4539   1
  11  -8  -2    8968    1816  -2
   9   8   2    8968    1816   1
  12  -8  -2  197179    4731  -2
  10   8   2  197179    4731   1
  13  -8  -2   18601    2320  -2
  11   8   2   18601    2320   1
  14  -8  -2  211196    5192  -2
  12   8   2  211196    5192   1
  15  -8  -2   64524    3674  -2
  13   8   2   64524    3674   1
  16  -8  -2  214798    8200  -2
  14   8   2  214798    8200   1
  15   8   2   93246    5702   1
  16   8   2  198945    6987   1
  17   8   2   56454    3531   1
  18   8   2   88207   10865   1
  19   8   2   10545    8353   1
  20   8   2   89775   12595   1
  21   8   2   15828   11813   1
 -22   9   2   74440    6927   1
 -21   9   2   13549    3898   1
 -20   9   2  165393    9952   1
 -19   9   2   11598    3356   1
 -18   9   2  264107    8293   1
 -17   9   2   18527    3623   1
 -14  -9  -2  334328    9478  -2
 -16   9   2  334328    9478   1
 -13  -9  -2   17041    3628  -2
 -15   9   2   17041    3628   1
 -12  -9  -2  437711    9828  -2
 -14   9   2  437711    9828   1
 -11  -9  -2   10332    2736  -2
 -13   9   2   10332    2736   1
 -10  -9  -2  304619    7836  -2
 -12   9   2  304619    7836   1
  -9  -9  -2   10640    2334  -2
 -11   9   2   10640    2334   1
  -8  -9  -2  476058   14177  -2
 -10   9   2  476058   14177   1
  -7  -9  -2   26913    2546  -2
  -9   9   2   26913    2546   1
  -6  -9  -2  374520    7063  -2
  -8   9   2  374520    7063   1
  -5  -9  -2   13652    2233  -2
  -7   9   2   13652    2233   1
  -4  -9  -2  695062   10006  -2
  -6   9   2  695062   10006   1
  -3  -9  -2   35815    2680  -2
  -5   9   2   35815    2680   1
  -2  -9  -2 1519362   17213  -2
  -4   9   2 1519362   17213   1
  -1  -9  -2  104991    4574  -2
  -3   9   2  104991    4574   1
   0  -9  -2 1569488   17376  -2
  -2   9   2 1569488   17376   1
   1  -9  -2    8303    1785  -2
  -1   9   2    8303    1785   1
   2  -9  -2 1578163   17382  -2
   0   9   2 1578163   17382   1
   3  -9  -2   14965    1868  -2
   1   9   2   14965    1868   1
   4  -9  -2  998000   12186  -2
   2   9   2  998000   12186   1
   5  -9  -2   18156    2051  -2
   3   9   2   18156    2051   1
   6  -9  -2  507968    7709  -2
   4   9   2  507968    7709   1
   7  -9  -2  140143    4886  -2
   5   9   2  140143    4886   1
   8  -9  -2  249121    8435  -2
   6   9   2  249121    8435   1
   9  -9  -2   46636    3825  -2
   7   9   2   46636    3825   1
  10  -9  -2  371739    6605  -2
   8   9   2  371739    6605   1
  11  -9  -2    3059    1704  -2
   9   9   2    3059    1704   1
  12  -9  -2  221003    5227  -2
  10   9   2  221003    5227   1
  13  -9  -2   86114    4418  -2
  11   9   2   86114    4418   1
  14  -9  -2  315205    7118  -2
  12   9   2  315205    7118   1
  15  -9  -2   20239    2724  -2
  13   9   2   20239    2724   1
  16  -9  -2  184260    8608  -2
  14   9   2  184260    8608   1
  15   9   2    8513    2444   1
  16   9   2  133904    8598   1
  17   9   2   27469    3299   1
  18   9   2   61533    5346   1
  19   9   2   20625    8294   1
  20   9   2   31426    8676   1
 -22  10   2   14933    6178   1
 -21  10   2   -3670    3837   1
 -20  10   2    3862    4263   1
 -19  10   2     440    2972   1
 -18  10   2   10422    3485   1
 -17  10   2   -2578    2578   1
 -14 -10  -2    4461    2930  -2
 -16  10   2    4461    2930   1
 -13 -10  -2    5544    2831  -2
 -15  10   2    5544    2831   1
 -12 -10  -2   14566    3402  -2
 -14  10   2   14566    3402   1
 -11 -10  -2    7222    2828  -2
 -13  10   2    7222    2828   1
 -10 -10  -2    2854    2464  -2
 -12  10   2    2854    2464   1
  -9 -10  -2  120050    5860  -2
 -11  10   2  120050    5860   1
  -8 -10  -2   24759    3172  -2
 -10  10   2   24759    3172   1
  -7 -10  -2    7472    2081  -2
  -9  10   2    7472    2081   1
  -6 -10  -2    3129    2001  -2
  -8  10   2    3129    2001   1
  -5 -10  -2   44299    3072  -2
  -7  10   2   44299    3072   1
  -4 -10  -2    3150    1753  -2
  -6  10   2    3150    1753   1
  -3 -10  -2   84778    5976  -2
  -5  10   2   84778    5976   1
  -2 -10  -2    8934    2001  -2
  -4  10   2    8934    2001   1
  -1 -10  -2   11024    2267  -2
  -3  10   2   11024    2267   1
   0 -10  -2    3318    1792  -2
  -2  10   2    3318    1792   1
   1 -10  -2   -1023    1640  -2
  -1  10   2   -1023    1640   1
   2 -10  -2   12764    2029  -2
   0  10   2   12764    2029   1
   3 -10  -2    1340    1584  -2
   1  10   2    1340    1584   1
   4 -10  -2   65678    3402  -2
   2  10   2   65678    3402   1
   5 -10  -2   69793    3900  -2
   3  10   2   69793    3900   1
   6 -10  -2   43410    2842  -2
   4  10   2   43410    2842   1
   7 -10  -2   35024    2560  -2
   5  10   2   35024    2560   1
   8 -10  -2   26404    2436  -2
   6  10   2   26404    2436   1
   9 -10  -2   11236    2491  -2
   7  10   2   11236    2491   1
  10 -10  -2   66068    3600  -2
   8  10   2   66068    3600   1
  11 -10  -2   16930    2368  -2
   9  10   2   16930    2368   1
  12 -10  -2   27565    2998  -2
  10  10   2   27565    2998   1
  13 -10  -2   27605    3057  -2
  11  10   2   27605    3057   1
  14 -10  -2   39827    3830  -2
  12  10   2   39827    3830   1
  15 -10  -2   13632    2733  -2
  13  10   2   13632    2733   1
  16 -10  -2   62541    4364  -2
  14  10   2   62541    4364   1
  15  10   2    -939    3027   1
  16  10   2   81833    4484   1
  17  10   2   10476    3602   1
  18  10   2   39511    4685   1
  19  10   2    9814    8793   1
  20  10   2   16314    7703   1
 -21  11   2    1815    7506   1
 -20  11   2   -4970    4970   1
 -19  11   2    3012    3956   1
 -18  11   2   31334    4259   1
 -17  11   2     160    3013   1
 -14 -11  -2   14146    5582  -2
 -16  11   2   14146    5582   1
 -13 -11  -2    3957    2868  -2
 -15  11   2    3957    2868   1
 -12 -11  -2   70740    5187  -2
 -14  11   2   70740    5187   1
 -11 -11  -2  175755    8348  -2
 -13  11   2  175755    8348   1
 -10 -11  -2   27894    4032  -2
 -12  11   2   27894    4032   1
  -9 -11  -2   36616    3780  -2
 -11  11   2   36616    3780   1
  -8 -11  -2    1881    2714  -2
 -10  11   2    1881    2714   1
  -7 -11  -2   10203    3445  -2
  -9  11   2   10203    3445   1
  -6 -11  -2   45626    4528  -2
  -8  11   2   45626    4528   1
  -5 -11  -2   29174    2804  -2
  -7  11   2   29174    2804   1
  -4 -11  -2   24300    3076  -2
  -6  11   2   24300    3076   1
  -3 -11  -2   25336    2488  -2
  -5  11   2   25336    2488   1
  -2 -11  -2    2408    1766  -2
  -4  11   2    2408    1766   1
  -1 -11  -2  170531   10536  -2
  -3  11   2  170531   10536   1
   0 -11  -2  160947    6472  -2
  -2  11   2  160947    6472   1
   1 -11  -2    8582    1963  -2
  -1  11   2    8582    1963   1
   2 -11  -2  161760    4824  -2
   0  11   2  161760    4824   1
   3 -11  -2   29650    2478  -2
   1  11   2   29650    2478   1
   4 -11  -2    6218    1851  -2
   2  11   2    6218    1851   1
   5 -11  -2  137285    4826  -2
   3  11   2  137285    4826   1
   6 -11  -2    4264    1942  -2
   4  11   2    4264    1942   1
   7 -11  -2   92949    4548  -2
   5  11   2   92949    4548   1
   8 -11  -2   24535    2553  -2
   6  11   2   24535    2553   1
   9 -11  -2   65084    5907  -2
   7  11   2   65084    5907   1
  10 -11  -2    4303    2282  -2
   8  11   2    4303    2282   1
  11 -11  -2   13094    2608  -2
   9  11   2   13094    2608   1
  12 -11  -2   -1775    2091  -2
  10  11   2   -1775    2091   1
  13 -11  -2   15749    2948  -2
  11  11   2   15749    2948   1
  14 -11  -2   10926    2983  -2
  12  11   2   10926    2983   1
  15 -11  -2    4354    2602  -2
  13  11   2    4354    2602   1
  16 -11  -2   10175    2725  -2
  14  11   2   10175    2725   1
  15  11   2    1960    2426   1
  16  11   2   15054    3188   1
  17  11   2     660    2334   1
  18  11   2    4039    3076   1
  19  11   2   -1410    6333   1
 -20  12   2   59495    6756   1
 -19  12   2   -3905    3905   1
 -18  12   2   15922    4648   1
 -17  12   2   21378    4836   1
 -14 -12  -2   14502    4287  -2
 -16  12   2   14502    4287   1
 -13 -12  -2   54877    4811  -2
 -15  12   2   54877    4811   1
 -12 -12  -2   20750    6085  -2
 -14  12   2   20750    6085   1
 -11 -12  -2    6394    4795  -2
 -13  12   2    6394    4795   1
 -10 -12  -2   20710    4121  -2
 -12  12   2   20710    4121   1
  -9 -12  -2    2575    2516  -2
 -11  12   2    2575    2516   1
  -8 -12  -2   74091    6105  -2
 -10  12   2   74091    6105   1
  -7 -12  -2   19853    3628  -2
  -9  12   2   19853    3628   1
  -6 -12  -2   11732    2848  -2
  -8  12   2   11732    2848   1
  -5 -12  -2   41526    3894  -2
  -7  12   2   41526    3894   1
  -4 -12  -2   34292    3738  -2
  -6  12   2   34292    3738   1
  -3 -12  -2   21428    2613  -2
  -5  12   2   21428    2613   1
  -2 -12  -2   73192    4095  -2
  -4  12   2   73192    4095   1
  -1 -12  -2   -1690    2065  -2
  -3  12   2   -1690    2065   1
   0 -12  -2   77313    4118  -2
  -2  12   2   77313    4118   1
   1 -12  -2    5127    2015  -2
  -1  12   2    5127    2015   1
   2 -12  -2  103449    5168  -2
   0  12   2  103449    5168   1
   3 -12  -2    1878    2243  -2
   1  12   2    1878    2243   1
   4 -12  -2   85803    4137  -2
   2  12   2   85803    4137   1
   5 -12  -2   80683    4154  -2
   3  12   2   80683    4154   1
   6 -12  -2  160746    5909  -2
   4  12   2  160746    5909   1
   7 -12  -2   68238    4332  -2
   5  12   2   68238    4332   1
   8 -12  -2   52783    3902  -2
   6  12   2   52783    3902   1
   9 -12  -2   84895    5535  -2
   7  12   2   84895    5535   1
  10 -12  -2   96441    5120  -2
   8  12   2   96441    5120   1
  11 -12  -2     880    3189  -2
   9  12   2     880    3189   1
  12 -12  -2  305403    7843  -2
  10  12   2  305403    7843   1
  13 -12  -2     548    2488  -2
  11  12   2     548    2488   1
  14 -12  -2  218216    6808  -2
  12  12   2  218216    6808   1
  15 -12  -2   47113    3994  -2
  13  12   2   47113    3994   1
  16 -12  -2  104623    7334  -2
  14  12   2  104623    7334   1
  15  12   2   32819    4069   1
  16  12   2   57887    4340   1
  17  12   2    7615    2777   1
  18  12   2   28888    4687   1
 -19  13   2   -2031    3695   1
 -18  13   2   52718    8150   1
 -17  13   2    4396    4221   1
 -14 -13  -2   77980    7364  -2
 -16  13   2   77980    7364   1
 -13 -13  -2    7943    5077  -2
 -15  13   2    7943    5077   1
 -12 -13  -2  214629   10085  -2
 -14  13   2  214629   10085   1
 -11 -13  -2    1889    5548  -2
 -13  13   2    1889    5548   1
 -10 -13  -2  504528   14314  -2
 -12  13   2  504528   14314   1
  -9 -13  -2   28781    4587  -2
 -11  13   2   28781    4587   1
  -8 -13  -2  886859   15589  -2
 -10  13   2  886859   15589   1
  -7 -13  -2   98073    5945  -2
  -9  13   2   98073    5945   1
  -6 -13  -2  677101   13097  -2
  -8  13   2  677101   13097   1
  -5 -13  -2   16198    3132  -2
  -7  13   2   16198    3132   1
  -4 -13  -2  380012    9369  -2
  -6  13   2  380012    9369   1
  -3 -13  -2   25382    3312  -2
  -5  13   2   25382    3312   1
  -2 -13  -2  595333   11834  -2
  -4  13   2  595333   11834   1
  -1 -13  -2  237093    7315  -2
  -3  13   2  237093    7315   1
   0 -13  -2  622410   10528  -2
  -2  13   2  622410   10528   1
   1 -13  -2   25105    3364  -2
  -1  13   2   25105    3364   1
   2 -13  -2  452313   10398  -2
   0  13   2  452313   10398   1
   3 -13  -2  198887    6635  -2
   1  13   2  198887    6635   1
   4 -13  -2  385721    8826  -2
   2  13   2  385721    8826   1
   5 -13  -2  123587    7136  -2
   3  13   2  123587    7136   1
   6 -13  -2  445080   10144  -2
   4  13   2  445080   10144   1
   7 -13  -2    5117    2607  -2
   5  13   2    5117    2607   1
   8 -13  -2  802943   16972  -2
   6  13   2  802943   16972   1
   9 -13  -2   28889    4819  -2
   7  13   2   28889    4819   1
  10 -13  -2  775352   13580  -2
   8  13   2  775352   13580   1
  11 -13  -2    6838    2770  -2
   9  13   2    6838    2770   1
  12 -13  -2  175887   10230  -2
  10  13   2  175887   10230   1
  13 -13  -2   12697    2889  -2
  11  13   2   12697    2889   1
  14 -13  -2   77111    4757  -2
  12  13   2   77111    4757   1
  15 -13  -2   10902    2862  -2
  13  13   2   10902    2862   1
  16 -13  -2   51484    4338  -2
  14  13   2   51484    4338   1
  15  13   2    6259    2850   1
  16  13   2   70056    4868   1
  17  13   2    4851    2844   1
  18  13   2    -436    2526   1
 -19  14   2   -4017    4017   1
 -18  14   2   10384    4744   1
 -17  14   2   12591    4971   1
 -14 -14  -2     -90    3901  -2
 -16  14   2     -90    3901   1
 -13 -14  -2    8029    4438  -2
 -15  14   2    8029    4438   1
 -12 -14  -2    3837    4019  -2
 -14  14   2    3837    4019   1
 -11 -14  -2   11076    4353  -2
 -13  14   2   11076    4353   1
 -10 -14  -2    9987    4761  -2
 -12  14   2    9987    4761   1
  -9 -14  -2   23144    5191  -2
 -11  14   2   23144    5191   1
  -8 -14  -2   31563    5328  -2
 -10  14   2   31563    5328   1
  -7 -14  -2    5268    4043  -2
  -9  14   2    5268    4043   1
  -6 -14  -2   36248    5253  -2
  -8  14   2   36248    5253   1
  -5 -14  -2     479    3351  -2
  -7  14   2     479    3351   1
  -4 -14  -2   15464    4346  -2
  -6  14   2   15464    4346   1
  -3 -14  -2     679    4476  -2
  -5  14   2     679    4476   1
  -2 -14  -2   30177    4916  -2
  -4  14   2   30177    4916   1
  -1 -14  -2    5351    3510  -2
  -3  14   2    5351    3510   1
   0 -14  -2  236171    9236  -2
  -2  14   2  236171    9236   1
   1 -14  -2   14832    3885  -2
  -1  14   2   14832    3885   1
   2 -14  -2  235920    9301  -2
   0  14   2  235920    9301   1
   3 -14  -2   17842    3642  -2
   1  14   2   17842    3642   1
   4 -14  -2   14508    3054  -2
   2  14   2   14508    3054   1
   5 -14  -2    7878    2710  -2
   3  14   2    7878    2710   1
   6 -14  -2    5849    3116  -2
   4  14   2    5849    3116   1
   7 -14  -2     467    3183  -2
   5  14   2     467    3183   1
   8 -14  -2   63540    4732  -2
   6  14   2   63540    4732   1
   9 -14  -2    2803    2715  -2
   7  14   2    2803    2715   1
  10 -14  -2   24719    3605  -2
   8  14   2   24719    3605   1
  11 -14  -2    2388    2775  -2
   9  14   2    2388    2775   1
  12 -14  -2   32433    3701  -2
  10  14   2   32433    3701   1
  13 -14  -2    6263    2836  -2
  11  14   2    6263    2836   1
  14 -14  -2   34615    4497  -2
  12  14   2   34615    4497   1
  15 -14  -2   11498    3263  -2
  13  14   2   11498    3263   1
  16 -14  -2   23476    4661  -2
  14  14   2   23476    4661   1
  15  14   2    -655    3015   1
  16  14   2   54467    4990   1
  17  14   2     -92    2542   1
 -18  15   2   -3970    3970   1
 -17  15   2    7248    5276   1
 -14 -15  -2    3613    4346  -2
 -16  15   2    3613    4346   1
 -13 -15  -2    6456    5468  -2
 -15  15   2    6456    5468   1
 -12 -15  -2    2055    4696  -2
 -14  15   2    2055    4696   1
 -11 -15  -2    5371    4188  -2
 -13  15   2    5371    4188   1
 -10 -15  -2    8038    4357  -2
 -12  15   2    8038    4357   1
  -9 -15  -2   19398    5002  -2
 -11  15   2   19398    5002   1
  -8 -15  -2   25021    5191  -2
 -10  15   2   25021    5191   1
  -7 -15  -2   47693    6297  -2
  -9  15   2   47693    6297   1
  -6 -15  -2   55146    6463  -2
  -8  15   2   55146    6463   1
  -5 -15  -2   19456    4859  -2
  -7  15   2   19456    4859   1
  -4 -15  -2   16699    4570  -2
  -6  15   2   16699    4570   1
  -3 -15  -2  123562    9269  -2
  -5  15   2  123562    9269   1
  -2 -15  -2   16839    4598  -2
  -4  15   2   16839    4598   1
  -1 -15  -2    3467    3771  -2
  -3  15   2    3467    3771   1
   0 -15  -2   54726   13509  -2
  -2  15   2   54726   13509   1
   1 -15  -2    1756    3584  -2
  -1  15   2    1756    3584   1
   2 -15  -2    3157    5285  -2
   0  15   2    3157    5285   1
   3 -15  -2   38681    8369  -2
   1  15   2   38681    8369   1
   4 -15  -2    5285    3732  -2
   2  15   2    5285    3732   1
   5 -15  -2   11721    5373  -2
   3  15   2   11721    5373   1
   6 -15  -2    -183    3540  -2
   4  15   2    -183    3540   1
   7 -15  -2   14273    5878  -2
   5  15   2   14273    5878   1
   8 -15  -2    2925    5440  -2
   6  15   2    2925    5440   1
   9 -15  -2   20449    3827  -2
   7  15   2   20449    3827   1
  10 -15  -2    2254    3797  -2
   8  15   2    2254    3797   1
  11 -15  -2   22803    3830  -2
   9  15   2   22803    3830   1
  12 -15  -2    9562    3280  -2
  10  15   2    9562    3280   1
  13 -15  -2   30861    4905  -2
  11  15   2   30861    4905   1
  14 -15  -2    8460    3164  -2
  12  15   2    8460    3164   1
  15 -15  -2   35119    4139  -2
  13  15   2   35119    4139   1
  16 -15  -2   31705    4622  -2
  14  15   2   31705    4622   1
  15  15   2    1196    3002   1
  16  15   2    2338    3784   1
 -17  16   2   13833    5108   1
 -14 -16  -2    7863    4422  -2
 -16  16   2    7863    4422   1
 -13 -16  -2   16350    5370  -2
 -15  16   2   16350    5370   1
 -12 -16  -2    9509    4485  -2
 -14  16   2    9509    4485   1
 -11 -16  -2   11347    5362  -2
 -13  16   2   11347    5362   1
 -10 -16  -2   15064    5217  -2
 -12  16   2   15064    5217   1
  -9 -16  -2   11193    5816  -2
 -11  16   2   11193    5816   1
  -8 -16  -2   39815    6180  -2
 -10  16   2   39815    6180   1
  -7 -16  -2     570    4120  -2
  -9  16   2     570    4120   1
  -6 -16  -2    2627    4012  -2
  -8  16   2    2627    4012   1
  -5 -16  -2   -1173    3942  -2
  -7  16   2   -1173    3942   1
  -4 -16  -2   42115    5936  -2
  -6  16   2   42115    5936   1
  -3 -16  -2    -471    3852  -2
  -5  16   2    -471    3852   1
  -2 -16  -2  116468    9125  -2
  -4  16   2  116468    9125   1
  -1 -16  -2    8072    4455  -2
  -3  16   2    8072    4455   1
   0 -16  -2   50022    6192  -2
  -2  16   2   50022    6192   1
   1 -16  -2    7442    4199  -2
  -1  16   2    7442    4199   1
   2 -16  -2   60220    9462  -2
   0  16   2   60220    9462   1
   3 -16  -2   21393    4796  -2
   1  16   2   21393    4796   1
   4 -16  -2  216970   20493  -2
   2  16   2  216970   20493   1
   5 -16  -2    8686    4242  -2
   3  16   2    8686    4242   1
   6 -16  -2  123575   12289  -2
   4  16   2  123575   12289   1
   7 -16  -2   23819    4888  -2
   5  16   2   23819    4888   1
   8 -16  -2    5601    3969  -2
   6  16   2    5601    3969   1
   9 -16  -2   28193    7578  -2
   7  16   2   28193    7578   1
  10 -16  -2    1064    4432  -2
   8  16   2    1064    4432   1
  11 -16  -2   24159    5261  -2
   9  16   2   24159    5261   1
  12 -16  -2   38492    5855  -2
  10  16   2   38492    5855   1
  13 -16  -2   39007    6050  -2
  11  16   2   39007    6050   1
  14 -16  -2   72716   11779  -2
  12  16   2   72716   11779   1
  15 -16  -2   52361    7055  -2
  13  16   2   52361    7055   1
  16 -16  -2   68968    6983  -2
  14  16   2   68968    6983   1
  15  16   2    6767    7352   1
 -13 -17  -2    1781    4630  -2
 -15  17   2    1781    4630   1
 -12 -17  -2  131858    9956  -2
 -14  17   2  131858    9956   1
 -11 -17  -2    1937    4409  -2
 -13  17   2    1937    4409   1
 -10 -17  -2  189321   11789  -2
 -12  17   2  189321   11789   1
  -9 -17  -2     660    4436  -2
 -11  17   2     660    4436   1
  -8 -17  -2  281080   12778  -2
 -10  17   2  281080   12778   1
  -7 -17  -2    3613    4166  -2
  -9  17   2    3613    4166   1
  -6 -17  -2  312052   12443  -2
  -8  17   2  312052   12443   1
  -5 -17  -2    4861    4205  -2
  -7  17   2    4861    4205   1
  -4 -17  -2  245593   11411  -2
  -6  17   2  245593   11411   1
  -3 -17  -2    1920    4061  -2
  -5  17   2    1920    4061   1
  -2 -17  -2  407843   21146  -2
  -4  17   2  407843   21146   1
  -1 -17  -2   42926    5996  -2
  -3  17   2   42926    5996   1
   0 -17  -2  500143   20564  -2
  -2  17   2  500143   20564   1
   1 -17  -2   16599    6437  -2
  -1  17   2   16599    6437   1
   2 -17  -2  556023   15436  -2
   0  17   2  556023   15436   1
   3 -17  -2   19208    4769  -2
   1  17   2   19208    4769   1
   4 -17  -2  389556   13587  -2
   2  17   2  389556   13587   1
   5 -17  -2     375    3719  -2
   3  17   2     375    3719   1
   6 -17  -2  223963   16465  -2
   4  17   2  223963   16465   1
   7 -17  -2    8432    3886  -2
   5  17   2    8432    3886   1
   8 -17  -2  151760   10815  -2
   6  17   2  151760   10815   1
   9 -17  -2    2886    3750  -2
   7  17   2    2886    3750   1
  10 -17  -2  222685   10719  -2
   8  17   2  222685   10719   1
  11 -17  -2   10456    4576  -2
   9  17   2   10456    4576   1
  12 -17  -2  129761   10282  -2
  10  17   2  129761   10282   1
  13 -17  -2     121    4263  -2
  11  17   2     121    4263   1
  14 -17  -2   68393    8275  -2
  12  17   2   68393    8275   1
  15 -17  -2    6226    4412  -2
  13  17   2    6226    4412   1
 -12 -18  -2   -4354    4354  -2
 -14  18   2   -4354    4354   1
 -11 -18  -2   -2262    4435  -2
 -13  18   2   -2262    4435   1
 -10 -18  -2     441    4071  -2
 -12  18   2     441    4071   1
  -9 -18  -2   -1568    4518  -2
 -11  18   2   -1568    4518   1
  -8 -18  -2    7971    6388  -2
 -10  18   2    7971    6388   1
  -7 -18  -2   22312    7695  -2
  -9  18   2   22312    7695   1
  -6 -18  -2    7144    4589  -2
  -8  18   2    7144    4589   1
  -5 -18  -2   23065    6118  -2
  -7  18   2   23065    6118   1
  -4 -18  -2   25320    5409  -2
  -6  18   2   25320    5409   1
  -3 -18  -2    1836    4244  -2
  -5  18   2    1836    4244   1
  -2 -18  -2   16987    5034  -2
  -4  18   2   16987    5034   1
  -1 -18  -2    -841    4196  -2
  -3  18   2    -841    4196   1
   0 -18  -2   -2462    3925  -2
  -2  18   2   -2462    3925   1
   1 -18  -2   33419    5768  -2
  -1  18   2   33419    5768   1
   2 -18  -2   20093    7083  -2
   0  18   2   20093    7083   1
   3 -18  -2    6790    4456  -2
   1  18   2    6790    4456   1
   4 -18  -2   64912    7293  -2
   2  18   2   64912    7293   1
   5 -18  -2   14418    4796  -2
   3  18   2   14418    4796   1
   6 -18  -2  134435    9919  -2
   4  18   2  134435    9919   1
   7 -18  -2   15777    4849  -2
   5  18   2   15777    4849   1
   8 -18  -2   73024   13004  -2
   6  18   2   73024   13004   1
   9 -18  -2    3116    5355  -2
   7  18   2    3116    5355   1
  10 -18  -2   10371    4997  -2
   8  18   2   10371    4997   1
  11 -18  -2    1068    5040  -2
   9  18   2    1068    5040   1
  12 -18  -2   23629    5604  -2
  10  18   2   23629    5604   1
  13 -18  -2    9383    4588  -2
  11  18   2    9383    4588   1
  14 -18  -2   69786    7431  -2
  12  18   2   69786    7431   1
 -10 -19  -2   29186    6182  -2
 -12  19   2   29186    6182   1
  -9 -19  -2    -196    4682  -2
 -11  19   2    -196    4682   1
  -8 -19  -2   11317    5257  -2
 -10  19   2   11317    5257   1
  -7 -19  -2   11285    5232  -2
  -9  19   2   11285    5232   1
  -6 -19  -2   -1859    4377  -2
  -8  19   2   -1859    4377   1
  -5 -19  -2   22284    5667  -2
  -7  19   2   22284    5667   1
  -4 -19  -2    7062    5873  -2
  -6  19   2    7062    5873   1
  -3 -19  -2   29152    6263  -2
  -5  19   2   29152    6263   1
  -2 -19  -2   20176    5734  -2
  -4  19   2   20176    5734   1
  -1 -19  -2   23199    5487  -2
  -3  19   2   23199    5487   1
   0 -19  -2   26226    5781  -2
  -2  19   2   26226    5781   1
   1 -19  -2    5449    4528  -2
  -1  19   2    5449    4528   1
   2 -19  -2   82648    8283  -2
   0  19   2   82648    8283   1
   3 -19  -2    1196   13639  -2
   1  19   2    1196   13639   1
   4 -19  -2   12541    4773  -2
   2  19   2   12541    4773   1
   5 -19  -2   14272    5242  -2
   3  19   2   14272    5242   1
   6 -19  -2    8696    5644  -2
   4  19   2    8696    5644   1
   7 -19  -2   29698    9823  -2
   5  19   2   29698    9823   1
   8 -19  -2    -669    5078  -2
   6  19   2    -669    5078   1
   9 -19  -2   16047    6754  -2
   7  19   2   16047    6754   1
  10 -19  -2    4008    4533  -2
   8  19   2    4008    4533   1
  11 -19  -2   15902    5491  -2
   9  19   2   15902    5491   1
  12 -19  -2    2794    4603  -2
  10  19   2    2794    4603   1
  -8 -20  -2   -3599    4680  -2
 -10  20   2   -3599    4680   1
  -7 -20  -2    5438    4722  -2
  -9  20   2    5438    4722   1
  -6 -20  -2   -2812    6268  -2
  -8  20   2   -2812    6268   1
  -5 -20  -2    2250    4736  -2
  -7  20   2    2250    4736   1
  -4 -20  -2   -4526    4526  -2
  -6  20   2   -4526    4526   1
  -3 -20  -2   14963    5576  -2
  -5  20   2   14963    5576   1
  -2 -20  -2    5705    4793  -2
  -4  20   2    5705    4793   1
  -1 -20  -2   -4417    5098  -2
  -3  20   2   -4417    5098   1
   0 -20  -2    9887    7625  -2
  -2  20   2    9887    7625   1
   1 -20  -2   18887   11562  -2
  -1  20   2   18887   11562   1
   2 -20  -2   27284    6343  -2
   0  20   2   27284    6343   1
   3 -20  -2    5455    4929  -2
   1  20   2    5455    4929   1
   4 -20  -2    6195   13297  -2
   2  20   2    6195   13297   1
   5 -20  -2    2723    4780  -2
   3  20   2    2723    4780   1
   6 -20  -2   16410    6325  -2
   4  20   2   16410    6325   1
   7 -20  -2    6189    4770  -2
   5  20   2    6189    4770   1
   8 -20  -2    6313    5090  -2
   6  20   2    6313    5090   1
   9 -20  -2   12845    5496  -2
   7  20   2   12845    5496   1
  10 -20  -2   -2387    4712  -2
   8  20   2   -2387    4712   1
  -5 -21  -2    3671    4828  -2
  -7  21   2    3671    4828   1
  -4 -21  -2  162670   11393  -2
  -6  21   2  162670   11393   1
  -3 -21  -2    3030    4475  -2
  -5  21   2    3030    4475   1
  -2 -21  -2  201065   12861  -2
  -4  21   2  201065   12861   1
  -1 -21  -2    7128    4915  -2
  -3  21   2    7128    4915   1
   0 -21  -2  234467   15269  -2
  -2  21   2  234467   15269   1
   1 -21  -2    7683    5369  -2
  -1  21   2    7683    5369   1
   2 -21  -2  189363   12280  -2
   0  21   2  189363   12280   1
   3 -21  -2   17344    5810  -2
   1  21   2   17344    5810   1
   4 -21  -2  150960   12804  -2
   2  21   2  150960   12804   1
   5 -21  -2    7972    6279  -2
   3  21   2    7972    6279   1
   6 -21  -2   65973   13184  -2
   4  21   2   65973   13184   1
   7 -21  -2    7795    5993  -2
   5  21   2    7795    5993   1
 -25   1   3    8662    5027   1
 -24   1   3   66654    7146   1
 -23   1   3    -353    4897   1
 -22   1   3  102917    8376   1
 -21   1   3   10293    4524   1
 -20   1   3   65188    5789   1
 -19   1   3    5348    2852   1
 -18   1   3   36597    4117   1
 -14  -1  -3    9246    2808  -2
 -17   1   3    9246    2808   1
 -13  -1  -3  219392    6664  -2
 -16   1   3  219392    6664   1
 -12  -1  -3   54435    3696  -2
 -15   1   3   54435    3696   1
 -11  -1  -3  235775    5869  -2
 -14   1   3  235775    5869   1
 -10  -1  -3  219480    5539  -2
 -13   1   3  219480    5539   1
  -9  -1  -3  399016    7274  -2
 -12   1   3  399016    7274   1
  -8  -1  -3  496768    7948  -2
 -11   1   3  496768    7948   1
  -7  -1  -3  196325    4801  -2
 -10   1   3  196325    4801   1
  -6  -1  -3   98715    3684  -2
  -9   1   3   98715    3684   1
  -5  -1  -3  278368    5218  -2
  -8   1   3  278368    5218   1
  -4  -1  -3   28199    2097  -2
  -7   1   3   28199    2097   1
  -3  -1  -3   34719    3101  -2
  -6   1   3   34719    3101   1
  -2  -1  -3  102390    3104  -2
  -5   1   3  102390    3104   1
  -1  -1  -3  427414    5729  -2
  -4   1   3  427414    5729   1
   0  -1  -3  288360    5019  -2
  -3   1   3  288360    5019   1
   1  -1  -3    9795    1049  -2
  -2   1   3    9795    1049   1
   2  -1  -3   11220     994  -2
  -1   1   3   11220     994   1
   3  -1  -3  320291    3822  -2
   0   1   3  320291    3822   1
   4  -1  -3  233698    2890  -2
   1   1   3  233698    2890   1
   5  -1  -3   82801    2659  -2
   2   1   3   82801    2659   1
   6  -1  -3   59544    2404  -2
   3   1   3   59544    2404   1
   7  -1  -3    3280    1297  -2
   4   1   3    3280    1297   1
   8  -1  -3  401208    9749  -2
   5   1   3  401208    9749   1
   9  -1  -3    8501    1687  -2
   6   1   3    8501    1687   1
  10  -1  -3   27169    1904  -2
   7   1   3   27169    1904   1
  12  -1  -3  478386    7343  -2
   9   1   3  478386    7343   1
  13  -1  -3   15071    1425  -2
  10   1   3   15071    1425   1
  14  -1  -3  189465    3873  -2
  11   1   3  189465    3873   1
  15  -1  -3   13929    3645  -2
  12   1   3   13929    3645   1
  16  -1  -3   87668    4344  -2
  13   1   3   87668    4344   1
  17  -1  -3   15930    2005  -2
  14   1   3   15930    2005   1
  15   1   3    4611    1914   1
  16   1   3   31602    2570   1
  17   1   3   -1020    1846   1
  18   1   3    6389    2106   1
  19   1   3    7430    2111   1
  20   1   3   23476    2677   1
  21   1   3    3547    1907   1
  22   1   3    4416    2161   1
 -24   2   3   41355    6234   1
 -23   2   3   85712    7712   1
 -22   2   3   51706    8030   1
 -21   2   3   69577    8892   1
 -20   2   3   69787    5549   1
 -19   2   3   33253    4083   1
 -18   2   3   60235    4354   1
 -14  -2  -3   57688    6748  -2
 -17   2   3   57688    6748   1
 -13  -2  -3  203172    6020  -2
 -16   2   3  203172    6020   1
 -12  -2  -3  330429   10052  -2
 -15   2   3  330429   10052   1
 -11  -2  -3  186310    5650  -2
 -14   2   3  186310    5650   1
 -10  -2  -3  334352    7228  -2
 -13   2   3  334352    7228   1
  -9  -2  -3  322926    6950  -2
 -12   2   3  322926    6950   1
  -8  -2  -3  292707   11197  -2
 -11   2   3  292707   11197   1
  -7  -2  -3  608521    8860  -2
 -10   2   3  608521    8860   1
  -6  -2  -3  398673    6630  -2
  -9   2   3  398673    6630   1
  -5  -2  -3  562557    7921  -2
  -8   2   3  562557    7921   1
  -4  -2  -3  199176   10372  -2
  -7   2   3  199176   10372   1
  -3  -2  -3 1196243   13185  -2
  -6   2   3 1196243   13185   1
  -2  -2  -3  757009   10353  -2
  -5   2   3  757009   10353   1
  -1  -2  -3 1589792   15861  -2
  -4   2   3 1589792   15861   1
   0  -2  -3  892293    9596  -2
  -3   2   3  892293    9596   1
   1  -2  -3   87290    2442  -2
  -2   2   3   87290    2442   1
   2  -2  -3  201801    3800  -2
  -1   2   3  201801    3800   1
   3  -2  -3  542706    8030  -2
   0   2   3  542706    8030   1
   4  -2  -3  995428   11003  -2
   1   2   3  995428   11003   1
   5  -2  -3 1733498   38422  -2
   2   2   3 1733498   38422   1
   6  -2  -3  408690    7171  -2
   3   2   3  408690    7171   1
   7  -2  -3 1193740   16845  -2
   4   2   3 1193740   16845   1
   8  -2  -3  273018    8296  -2
   5   2   3  273018    8296   1
   9  -2  -3  934330   16400  -2
   6   2   3  934330   16400   1
  10  -2  -3  199889   14422  -2
   7   2   3  199889   14422   1
  11  -2  -3 1285745   19162  -2
   8   2   3 1285745   19162   1
  12  -2  -3   69210    8431  -2
   9   2   3   69210    8431   1
  13  -2  -3 1011516   13362  -2
  10   2   3 1011516   13362   1
  14  -2  -3   15237    3259  -2
  11   2   3   15237    3259   1
  15  -2  -3 1019393   13543  -2
  12   2   3 1019393   13543   1
  16  -2  -3   13550    2350  -2
  13   2   3   13550    2350   1
  17  -2  -3  243562    4991  -2
  14   2   3  243562    4991   1
  15   2   3   15915    2562   1
  16   2   3   84337    3503   1
  17   2   3    9182    2063   1
  18   2   3  216933    7183   1
  19   2   3   11203    2464   1
  20   2   3  222408   12594   1
  21   2   3     760    3801   1
 -24   3   3  105731    8747   1
 -23   3   3   21735    5390   1
 -22   3   3  110347    8489   1
 -21   3   3   35517    9514   1
 -20   3   3   46021    5047   1
 -19   3   3   68927    5300   1
 -18   3   3   85617    5567   1
 -14  -3  -3     270    2312  -2
 -17   3   3     270    2312   1
 -13  -3  -3  259348    6521  -2
 -16   3   3  259348    6521   1
 -12  -3  -3   11534    2480  -2
 -15   3   3   11534    2480   1
 -11  -3  -3  363029    7265  -2
 -14   3   3  363029    7265   1
 -10  -3  -3    8248    2088  -2
 -13   3   3    8248    2088   1
  -9  -3  -3  160847    4941  -2
 -12   3   3  160847    4941   1
  -8  -3  -3  133450    4620  -2
 -11   3   3  133450    4620   1
  -7  -3  -3   22426    2908  -2
 -10   3   3   22426    2908   1
  -6  -3  -3   -1053    1604  -2
  -9   3   3   -1053    1604   1
  -5  -3  -3  470802    7147  -2
  -8   3   3  470802    7147   1
  -4  -3  -3   78321    4354  -2
  -7   3   3   78321    4354   1
  -3  -3  -3  220588    7599  -2
  -6   3   3  220588    7599   1
  -2  -3  -3   20723    2158  -2
  -5   3   3   20723    2158   1
  -1  -3  -3  268207    5981  -2
  -4   3   3  268207    5981   1
   0  -3  -3  191726    3661  -2
  -3   3   3  191726    3661   1
   1  -3  -3   26157    1675  -2
  -2   3   3   26157    1675   1
   2  -3  -3   80987    2495  -2
  -1   3   3   80987    2495   1
   3  -3  -3  199127    3819  -2
   0   3   3  199127    3819   1
   4  -3  -3  135810    2545  -2
   1   3   3  135810    2545   1
   5  -3  -3   71575    3960  -2
   2   3   3   71575    3960   1
   6  -3  -3   33627    2553  -2
   3   3   3   33627    2553   1
   7  -3  -3  240764    7915  -2
   4   3   3  240764    7915   1
   8  -3  -3   91677    3810  -2
   5   3   3   91677    3810   1
   9  -3  -3     132    1734  -2
   6   3   3     132    1734   1
  10  -3  -3    8620    2200  -2
   7   3   3    8620    2200   1
  11  -3  -3   80699    4228  -2
   8   3   3   80699    4228   1
  12  -3  -3  138735    7685  -2
   9   3   3  138735    7685   1
  13  -3  -3    9142    2568  -2
  10   3   3    9142    2568   1
  14  -3  -3   90130   12077  -2
  11   3   3   90130   12077   1
  15  -3  -3    2843    2202  -2
  12   3   3    2843    2202   1
  16  -3  -3   31398    3590  -2
  13   3   3   31398    3590   1
  17  -3  -3   18890    2495  -2
  14   3   3   18890    2495   1
  15   3   3   20953    2807   1
  16   3   3   38940    2854   1
  17   3   3   31712    4189   1
  18   3   3   28853    4953   1
  19   3   3   40268    4931   1
  20   3   3   19359    5755   1
  21   3   3    1465    4598   1
 -24   4   3      61    4224   1
 -23   4   3   -3452    4031   1
 -22   4   3   -4117    4291   1
 -21   4   3   10941    4460   1
 -20   4   3    6464    3407   1
 -19   4   3   -1331    2928   1
 -18   4   3   70162    5143   1
 -14  -4  -3    6551    3254  -2
 -17   4   3    6551    3254   1
 -13  -4  -3   82593    4801  -2
 -16   4   3   82593    4801   1
 -12  -4  -3   20959    2561  -2
 -15   4   3   20959    2561   1
 -11  -4  -3   -1723    1932  -2
 -14   4   3   -1723    1932   1
 -10  -4  -3   38663    3033  -2
 -13   4   3   38663    3033   1
  -9  -4  -3    3547    1946  -2
 -12   4   3    3547    1946   1
  -8  -4  -3   11573    2016  -2
 -11   4   3   11573    2016   1
  -7  -4  -3   60387    3278  -2
 -10   4   3   60387    3278   1
  -6  -4  -3   11768    1953  -2
  -9   4   3   11768    1953   1
  -5  -4  -3   48754    2737  -2
  -8   4   3   48754    2737   1
  -4  -4  -3   11659    1671  -2
  -7   4   3   11659    1671   1
  -3  -4  -3   17944    1796  -2
  -6   4   3   17944    1796   1
  -2  -4  -3   52466    2469  -2
  -5   4   3   52466    2469   1
  -1  -4  -3  355700    5462  -2
  -4   4   3  355700    5462   1
   0  -4  -3  856824   11306  -2
  -3   4   3  856824   11306   1
   1  -4  -3  461059    7373  -2
  -2   4   3  461059    7373   1
   2  -4  -3  110983    3425  -2
  -1   4   3  110983    3425   1
   3  -4  -3  729297   10570  -2
   0   4   3  729297   10570   1
   4  -4  -3  351156    4748  -2
   1   4   3  351156    4748   1
   5  -4  -3   49667    2168  -2
   2   4   3   49667    2168   1
   6  -4  -3   56339    3889  -2
   3   4   3   56339    3889   1
   7  -4  -3   56750    2728  -2
   4   4   3   56750    2728   1
   8  -4  -3   13410    2332  -2
   5   4   3   13410    2332   1
   9  -4  -3   43800    3942  -2
   6   4   3   43800    3942   1
  10  -4  -3    9302    2411  -2
   7   4   3    9302    2411   1
  11  -4  -3  124438    5178  -2
   8   4   3  124438    5178   1
  12  -4  -3    -513    2175  -2
   9   4   3    -513    2175   1
  13  -4  -3   76656    5124  -2
  10   4   3   76656    5124   1
  14  -4  -3   -2017    2379  -2
  11   4   3   -2017    2379   1
  15  -4  -3  151158    6970  -2
  12   4   3  151158    6970   1
  16  -4  -3    8788    3174  -2
  13   4   3    8788    3174   1
  17  -4  -3   54416    5083  -2
  14   4   3   54416    5083   1
  15   4   3   13314    3748   1
  16   4   3   -3236    3236   1
  17   4   3    6417    3496   1
  18   4   3      87    3702   1
  19   4   3    3235    4814   1
  20   4   3   15765    6966   1
  21   4   3   11538    5987   1
 -24   5   3   26869    7168   1
 -23   5   3   -2649    3855   1
 -22   5   3   34446    5589   1
 -21   5   3    4474    4014   1
 -20   5   3   70818    5936   1
 -19   5   3   -1182    2779   1
 -18   5   3   73456    5514   1
 -14  -5  -3   91528    6552  -2
 -17   5   3   91528    6552   1
 -13  -5  -3   63492    4519  -2
 -16   5   3   63492    4519   1
 -12  -5  -3  106395    5404  -2
 -15   5   3  106395    5404   1
 -11  -5  -3    3889    2115  -2
 -14   5   3    3889    2115   1
 -10  -5  -3   69445    3769  -2
 -13   5   3   69445    3769   1
  -9  -5  -3  148228    4808  -2
 -12   5   3  148228    4808   1
  -8  -5  -3   12696    2148  -2
 -11   5   3   12696    2148   1
  -7  -5  -3  236573    5415  -2
 -10   5   3  236573    5415   1
  -6  -5  -3   12268    2180  -2
  -9   5   3   12268    2180   1
  -5  -5  -3  300450    6377  -2
  -8   5   3  300450    6377   1
  -4  -5  -3   24483    2047  -2
  -7   5   3   24483    2047   1
  -3  -5  -3  253010    4953  -2
  -6   5   3  253010    4953   1
  -2  -5  -3   30609    2023  -2
  -5   5   3   30609    2023   1
  -1  -5  -3  335669    5468  -2
  -4   5   3  335669    5468   1
   0  -5  -3   27898    2253  -2
  -3   5   3   27898    2253   1
   1  -5  -3   10814    1489  -2
  -2   5   3   10814    1489   1
   2  -5  -3   64459    2603  -2
  -1   5   3   64459    2603   1
   3  -5  -3   72359    2599  -2
   0   5   3   72359    2599   1
   4  -5  -3  125473    3466  -2
   1   5   3  125473    3466   1
   5  -5  -3  167483    3293  -2
   2   5   3  167483    3293   1
   6  -5  -3   35687    3458  -2
   3   5   3   35687    3458   1
   7  -5  -3  106682    3733  -2
   4   5   3  106682    3733   1
   8  -5  -3   65523    2607  -2
   5   5   3   65523    2607   1
   9  -5  -3    1700    1060  -2
   6   5   3    1700    1060   1
  10  -5  -3   91981    4313  -2
   7   5   3   91981    4313   1
  11  -5  -3   17139    2946  -2
   8   5   3   17139    2946   1
  12  -5  -3   65603    5873  -2
   9   5   3   65603    5873   1
  13  -5  -3   37526    3846  -2
  10   5   3   37526    3846   1
  14  -5  -3   -2497    2497  -2
  11   5   3   -2497    2497   1
  15  -5  -3   55645    4845  -2
  12   5   3   55645    4845   1
  16  -5  -3    9647    3492  -2
  13   5   3    9647    3492   1
  17  -5  -3    5053    3680  -2
  14   5   3    5053    3680   1
  15   5   3   10641    3711   1
  16   5   3    6546    3803   1
  17   5   3   28377    5005   1
  18   5   3    9700    6084   1
  19   5   3   13537    6310   1
  20   5   3   10927    9005   1
  21   5   3   14016    6454   1
 -24   6   3    9155    4638   1
 -23   6   3   38685    5642   1
 -22   6   3   29345    6175   1
 -21   6   3   56804    6261   1
 -20   6   3   18016    3936   1
 -19   6   3   75534    6516   1
 -18   6   3   18109    3925   1
 -14  -6  -3   42313    7398  -2
 -17   6   3   42313    7398   1
 -13  -6  -3  150817    6839  -2
 -16   6   3  150817    6839   1
 -12  -6  -3   42195    5111  -2
 -15   6   3   42195    5111   1
 -11  -6  -3  652149   14203  -2
 -14   6   3  652149   14203   1
 -10  -6  -3   55108    3162  -2
 -13   6   3   55108    3162   1
  -9  -6  -3  528494    8865  -2
 -12   6   3  528494    8865   1
  -8  -6  -3  350556    6875  -2
 -11   6   3  350556    6875   1
  -7  -6  -3  405884    7268  -2
 -10   6   3  405884    7268   1
  -6  -6  -3  260358    6626  -2
  -9   6   3  260358    6626   1
  -5  -6  -3  324934    6971  -2
  -8   6   3  324934    6971   1
  -4  -6  -3  234918    8548  -2
  -7   6   3  234918    8548   1
  -3  -6  -3  365858    6253  -2
  -6   6   3  365858    6253   1
  -2  -6  -3  197179    5096  -2
  -5   6   3  197179    5096   1
  -1  -6  -3  348013    5764  -2
  -4   6   3  348013    5764   1
   0  -6  -3  325965    5462  -2
  -3   6   3  325965    5462   1
   1  -6  -3 1064080   11999  -2
  -2   6   3 1064080   11999   1
   2  -6  -3  183220    3862  -2
  -1   6   3  183220    3862   1
   3  -6  -3  735890    8924  -2
   0   6   3  735890    8924   1
   4  -6  -3  259405    5323  -2
   1   6   3  259405    5323   1
   5  -6  -3  793009    9263  -2
   2   6   3  793009    9263   1
   6  -6  -3   74859    3258  -2
   3   6   3   74859    3258   1
   7  -6  -3 1370492   14210  -2
   4   6   3 1370492   14210   1
   8  -6  -3  124741    4101  -2
   5   6   3  124741    4101   1
   9  -6  -3  861842   20632  -2
   6   6   3  861842   20632   1
  10  -6  -3  139953    6241  -2
   7   6   3  139953    6241   1
  11  -6  -3  809325   11487  -2
   8   6   3  809325   11487   1
  12  -6  -3   43743    4388  -2
   9   6   3   43743    4388   1
  13  -6  -3  417278    9599  -2
  10   6   3  417278    9599   1
  14  -6  -3  104579    7116  -2
  11   6   3  104579    7116   1
  15  -6  -3  578222   17243  -2
  12   6   3  578222   17243   1
  16  -6  -3  109594    6838  -2
  13   6   3  109594    6838   1
  17  -6  -3  561457   13812  -2
  14   6   3  561457   13812   1
  15   6   3   24539    5860   1
  16   6   3  288590   15144   1
  17   6   3   -1336   11732   1
  18   6   3  146163   12510   1
  19   6   3   21940    7073   1
  20   6   3   48894    8493   1
  21   6   3    -576    5771   1
 -23   7   3    9534    6019   1
 -22   7   3  119070    8703   1
 -21   7   3   11230    4316   1
 -20   7   3  146077    7253   1
 -19   7   3   11550    4326   1
 -18   7   3  156883    7371   1
 -14  -7  -3   79005    5465  -2
 -17   7   3   79005    5465   1
 -13  -7  -3  286319   10395  -2
 -16   7   3  286319   10395   1
 -12  -7  -3   43112    4449  -2
 -15   7   3   43112    4449   1
 -11  -7  -3  258733    7528  -2
 -14   7   3  258733    7528   1
 -10  -7  -3   11408    2744  -2
 -13   7   3   11408    2744   1
  -9  -7  -3   56688    3929  -2
 -12   7   3   56688    3929   1
  -8  -7  -3   13008    2317  -2
 -11   7   3   13008    2317   1
  -7  -7  -3  214883    5736  -2
 -10   7   3  214883    5736   1
  -6  -7  -3   54926    3894  -2
  -9   7   3   54926    3894   1
  -5  -7  -3  328587    6296  -2
  -8   7   3  328587    6296   1
  -4  -7  -3   42317    2511  -2
  -7   7   3   42317    2511   1
  -3  -7  -3  958521   11949  -2
  -6   7   3  958521   11949   1
  -2  -7  -3   75320    4472  -2
  -5   7   3   75320    4472   1
  -1  -7  -3  573022    8181  -2
  -4   7   3  573022    8181   1
   0  -7  -3    2255    1694  -2
  -3   7   3    2255    1694   1
   1  -7  -3  120320    3523  -2
  -2   7   3  120320    3523   1
   2  -7  -3   33470    2174  -2
  -1   7   3   33470    2174   1
   3  -7  -3   11758    1978  -2
   0   7   3   11758    1978   1
   4  -7  -3  129242    3507  -2
   1   7   3  129242    3507   1
   5  -7  -3  605346    8004  -2
   2   7   3  605346    8004   1
   6  -7  -3  124399    7216  -2
   3   7   3  124399    7216   1
   7  -7  -3  292017    6647  -2
   4   7   3  292017    6647   1
   8  -7  -3  108459    3450  -2
   5   7   3  108459    3450   1
   9  -7  -3    8853    2214  -2
   6   7   3    8853    2214   1
  10  -7  -3  227284    4383  -2
   7   7   3  227284    4383   1
  11  -7  -3   99100    4425  -2
   8   7   3   99100    4425   1
  12  -7  -3   80906    3049  -2
   9   7   3   80906    3049   1
  13  -7  -3  209937    4740  -2
  10   7   3  209937    4740   1
  14  -7  -3   22364    2182  -2
  11   7   3   22364    2182   1
  15  -7  -3   42011    4852  -2
  12   7   3   42011    4852   1
  16  -7  -3   16217    5513  -2
  13   7   3   16217    5513   1
  17  -7  -3    9212    4007  -2
  14   7   3    9212    4007   1
  15   7   3   52503   12611   1
  16   7   3    6501    5823   1
  17   7   3   83638   10273   1
  18   7   3    8154    7357   1
  19   7   3   69669    9977   1
  20   7   3   26623    7934   1
 -23   8   3   16399    4764   1
 -22   8   3   23573    5309   1
 -21   8   3   33231    5653   1
 -20   8   3    8119    4232   1
 -19   8   3    4805    3004   1
 -18   8   3    3574    3281   1
 -14  -8  -3    2120    2711  -2
 -17   8   3    2120    2711   1
 -13  -8  -3   12767    3376  -2
 -16   8   3   12767    3376   1
 -12  -8  -3    7467    4814  -2
 -15   8   3    7467    4814   1
 -11  -8  -3  198282    7400  -2
 -14   8   3  198282    7400   1
 -10  -8  -3  119650    5910  -2
 -13   8   3  119650    5910   1
  -9  -8  -3  221430    5840  -2
 -12   8   3  221430    5840   1
  -8  -8  -3   93413    4511  -2
 -11   8   3   93413    4511   1
  -7  -8  -3  153388    5218  -2
 -10   8   3  153388    5218   1
  -6  -8  -3   46125    3161  -2
  -9   8   3   46125    3161   1
  -5  -8  -3   35288    2728  -2
  -8   8   3   35288    2728   1
  -4  -8  -3   58986    3213  -2
  -7   8   3   58986    3213   1
  -3  -8  -3   16904    2107  -2
  -6   8   3   16904    2107   1
  -2  -8  -3  125026    4309  -2
  -5   8   3  125026    4309   1
  -1  -8  -3  547366    8245  -2
  -4   8   3  547366    8245   1
   0  -8  -3   51797    2745  -2
  -3   8   3   51797    2745   1
   1  -8  -3  255930    5223  -2
  -2   8   3  255930    5223   1
   2  -8  -3   67350    2987  -2
  -1   8   3   67350    2987   1
   3  -8  -3  410124    6593  -2
   0   8   3  410124    6593   1
   4  -8  -3  112999    3599  -2
   1   8   3  112999    3599   1
   5  -8  -3  258518    5923  -2
   2   8   3  258518    5923   1
   6  -8  -3   15231    1891  -2
   3   8   3   15231    1891   1
   7  -8  -3  110273    3497  -2
   4   8   3  110273    3497   1
   8  -8  -3   11793    1757  -2
   5   8   3   11793    1757   1
   9  -8  -3  131548    4630  -2
   6   8   3  131548    4630   1
  10  -8  -3   17488    2397  -2
   7   8   3   17488    2397   1
  11  -8  -3  160173    5235  -2
   8   8   3  160173    5235   1
  12  -8  -3   32306    4002  -2
   9   8   3   32306    4002   1
  13  -8  -3  105743    4403  -2
  10   8   3  105743    4403   1
  14  -8  -3   16123    2711  -2
  11   8   3   16123    2711   1
  15  -8  -3  121615    4860  -2
  12   8   3  121615    4860   1
  16  -8  -3   32891    7379  -2
  13   8   3   32891    7379   1
  17  -8  -3   36516    7553  -2
  14   8   3   36516    7553   1
  15   8   3   -2630    4631   1
  16   8   3   36930    8100   1
  17   8   3     474    9170   1
  18   8   3   40035    8458   1
  19   8   3   12435    6817   1
  20   8   3   45519    9088   1
 -22   9   3    2460    6136   1
 -21   9   3   34466    7140   1
 -20   9   3   26017    5241   1
 -19   9   3   59984    6392   1
 -18   9   3    9541    3320   1
 -14  -9  -3   34630    4459  -2
 -17   9   3   34630    4459   1
 -13  -9  -3   13175    3142  -2
 -16   9   3   13175    3142   1
 -12  -9  -3    7668    3090  -2
 -15   9   3    7668    3090   1
 -11  -9  -3    1760    2657  -2
 -14   9   3    1760    2657   1
 -10  -9  -3    1394    2533  -2
 -13   9   3    1394    2533   1
  -9  -9  -3   22047    3081  -2
 -12   9   3   22047    3081   1
  -8  -9  -3    8588    3145  -2
 -11   9   3    8588    3145   1
  -7  -9  -3   30802    3568  -2
 -10   9   3   30802    3568   1
  -6  -9  -3    2004    1807  -2
  -9   9   3    2004    1807   1
  -5  -9  -3   54600    3354  -2
  -8   9   3   54600    3354   1
  -4  -9  -3    7659    2610  -2
  -7   9   3    7659    2610   1
  -3  -9  -3    1732    1680  -2
  -6   9   3    1732    1680   1
  -2  -9  -3   72156    3815  -2
  -5   9   3   72156    3815   1
  -1  -9  -3  116250    4310  -2
  -4   9   3  116250    4310   1
   0  -9  -3   65331    3149  -2
  -3   9   3   65331    3149   1
   1  -9  -3  301475    5986  -2
  -2   9   3  301475    5986   1
   2  -9  -3   50547    3947  -2
  -1   9   3   50547    3947   1
   3  -9  -3  297219    5769  -2
   0   9   3  297219    5769   1
   4  -9  -3   87448    3663  -2
   1   9   3   87448    3663   1
   5  -9  -3   72044    3377  -2
   2   9   3   72044    3377   1
   6  -9  -3   10713    1830  -2
   3   9   3   10713    1830   1
   7  -9  -3   21169    2115  -2
   4   9   3   21169    2115   1
   8  -9  -3    4091    1706  -2
   5   9   3    4091    1706   1
   9  -9  -3   17822    2138  -2
   6   9   3   17822    2138   1
  10  -9  -3   26025    2265  -2
   7   9   3   26025    2265   1
  11  -9  -3    2396    1536  -2
   8   9   3    2396    1536   1
  12  -9  -3   48514    3050  -2
   9   9   3   48514    3050   1
  13  -9  -3   19343    2259  -2
  10   9   3   19343    2259   1
  14  -9  -3   -2121    2121  -2
  11   9   3   -2121    2121   1
  15  -9  -3    -952    2002  -2
  12   9   3    -952    2002   1
  16  -9  -3  124386    4712  -2
  13   9   3  124386    4712   1
  17  -9  -3   14774    6443  -2
  14   9   3   14774    6443   1
  15   9   3   14642    6922   1
  16   9   3   10303    6068   1
  17   9   3   -1033    7848   1
  18   9   3    1068    5745   1
  19   9   3   11689    6874   1
 -22  10   3    -138    5224   1
 -21  10   3    9237    4543   1
 -20  10   3   81313    9839   1
 -19  10   3   11883    6179   1
 -18  10   3  115003    8357   1
 -14 -10  -3   39715    4236  -2
 -17  10   3   39715    4236   1
 -13 -10  -3   61958    6654  -2
 -16  10   3   61958    6654   1
 -12 -10  -3   68414    7871  -2
 -15  10   3   68414    7871   1
 -11 -10  -3   37066    4216  -2
 -14  10   3   37066    4216   1
 -10 -10  -3   16883    2831  -2
 -13  10   3   16883    2831   1
  -9 -10  -3   32783    3704  -2
 -12  10   3   32783    3704   1
  -8 -10  -3   46245    4828  -2
 -11  10   3   46245    4828   1
  -7 -10  -3  305073    8272  -2
 -10  10   3  305073    8272   1
  -6 -10  -3   39925    4322  -2
  -9  10   3   39925    4322   1
  -5 -10  -3  190719    6048  -2
  -8  10   3  190719    6048   1
  -4 -10  -3   56156    3614  -2
  -7  10   3   56156    3614   1
  -3 -10  -3  300480    6442  -2
  -6  10   3  300480    6442   1
  -2 -10  -3   49284    3622  -2
  -5  10   3   49284    3622   1
  -1 -10  -3  391976    7265  -2
  -4  10   3  391976    7265   1
   0 -10  -3   57450    3703  -2
  -3  10   3   57450    3703   1
   1 -10  -3  717979   10303  -2
  -2  10   3  717979   10303   1
   2 -10  -3   85968    7254  -2
  -1  10   3   85968    7254   1
   3 -10  -3  488033    7931  -2
   0  10   3  488033    7931   1
   4 -10  -3   60022    3954  -2
   1  10   3   60022    3954   1
   5 -10  -3  448394    7735  -2
   2  10   3  448394    7735   1
   6 -10  -3   53269    3288  -2
   3  10   3   53269    3288   1
   7 -10  -3  369452    6639  -2
   4  10   3  369452    6639   1
   8 -10  -3   31517    2363  -2
   5  10   3   31517    2363   1
   9 -10  -3  624116   10307  -2
   6  10   3  624116   10307   1
  10 -10  -3   85143    3927  -2
   7  10   3   85143    3927   1
  11 -10  -3  288294    6117  -2
   8  10   3  288294    6117   1
  12 -10  -3    1864    1985  -2
   9  10   3    1864    1985   1
  13 -10  -3  233499    6835  -2
  10  10   3  233499    6835   1
  14 -10  -3   16780    2732  -2
  11  10   3   16780    2732   1
  15 -10  -3  253348    6781  -2
  12  10   3  253348    6781   1
  16 -10  -3    1764    2226  -2
  13  10   3    1764    2226   1
  17 -10  -3  213472    7316  -2
  14  10   3  213472    7316   1
  15  10   3   15931    4331   1
  16  10   3  148910   14223   1
  17  10   3    2234    7147   1
  18  10   3   94529   11525   1
  19  10   3   -4621    5838   1
 -21  11   3   -2355    4260   1
 -20  11   3   84507    7882   1
 -19  11   3    2843    6387   1
 -18  11   3   96025    7959   1
 -14 -11  -3   12695    4500  -2
 -17  11   3   12695    4500   1
 -13 -11  -3  111463    8293  -2
 -16  11   3  111463    8293   1
 -12 -11  -3   -1326    2762  -2
 -15  11   3   -1326    2762   1
 -11 -11  -3   92903    6300  -2
 -14  11   3   92903    6300   1
 -10 -11  -3   30752    3914  -2
 -13  11   3   30752    3914   1
  -9 -11  -3  252779    7913  -2
 -12  11   3  252779    7913   1
  -8 -11  -3   50939    6348  -2
 -11  11   3   50939    6348   1
  -7 -11  -3  217505   10584  -2
 -10  11   3  217505   10584   1
  -6 -11  -3   12445    2798  -2
  -9  11   3   12445    2798   1
  -5 -11  -3  224167    6885  -2
  -8  11   3  224167    6885   1
  -4 -11  -3    1912    1855  -2
  -7  11   3    1912    1855   1
  -3 -11  -3   91105    4946  -2
  -6  11   3   91105    4946   1
  -2 -11  -3   -1624    1624  -2
  -5  11   3   -1624    1624   1
  -1 -11  -3   46580    3261  -2
  -4  11   3   46580    3261   1
   0 -11  -3   77278    4269  -2
  -3  11   3   77278    4269   1
   1 -11  -3   49382    3248  -2
  -2  11   3   49382    3248   1
   2 -11  -3   55168    4515  -2
  -1  11   3   55168    4515   1
   3 -11  -3  107406    4364  -2
   0  11   3  107406    4364   1
   4 -11  -3    4748    1835  -2
   1  11   3    4748    1835   1
   5 -11  -3   -1025    1614  -2
   2  11   3   -1025    1614   1
   6 -11  -3   12774    2362  -2
   3  11   3   12774    2362   1
   7 -11  -3   -1617    1617  -2
   4  11   3   -1617    1617   1
   8 -11  -3   18670    2025  -2
   5  11   3   18670    2025   1
   9 -11  -3    5753    2091  -2
   6  11   3    5753    2091   1
  10 -11  -3   34487    2784  -2
   7  11   3   34487    2784   1
  11 -11  -3   13744    4455  -2
   8  11   3   13744    4455   1
  12 -11  -3   60324    3770  -2
   9  11   3   60324    3770   1
  13 -11  -3    7773    2383  -2
  10  11   3    7773    2383   1
  14 -11  -3   74122    4190  -2
  11  11   3   74122    4190   1
  15 -11  -3    3896    2261  -2
  12  11   3    3896    2261   1
  16 -11  -3   59993    3887  -2
  13  11   3   59993    3887   1
  17 -11  -3   10972    2648  -2
  14  11   3   10972    2648   1
  15  11   3   10179    2566   1
  16  11   3   36639    8954   1
  17  11   3   17707    7427   1
  18  11   3    8899    6970   1
 -21  12   3   10693    4893   1
 -20  12   3   19086    5186   1
 -19  12   3    -525    5342   1
 -18  12   3    4105    4343   1
 -14 -12  -3   13015    4350  -2
 -17  12   3   13015    4350   1
 -13 -12  -3   -3545    3545  -2
 -16  12   3   -3545    3545   1
 -12 -12  -3   33483    5393  -2
 -15  12   3   33483    5393   1
 -11 -12  -3    7041    4008  -2
 -14  12   3    7041    4008   1
 -10 -12  -3  126897   10580  -2
 -13  12   3  126897   10580   1
  -9 -12  -3  116511    6368  -2
 -12  12   3  116511    6368   1
  -8 -12  -3   44966    4015  -2
 -11  12   3   44966    4015   1
  -7 -12  -3  280590    8620  -2
 -10  12   3  280590    8620   1
  -6 -12  -3   41959    5007  -2
  -9  12   3   41959    5007   1
  -5 -12  -3  278407   13983  -2
  -8  12   3  278407   13983   1
  -4 -12  -3   19454    3337  -2
  -7  12   3   19454    3337   1
  -3 -12  -3  386752    9568  -2
  -6  12   3  386752    9568   1
  -2 -12  -3   48244    3244  -2
  -5  12   3   48244    3244   1
  -1 -12  -3  296008   11471  -2
  -4  12   3  296008   11471   1
   0 -12  -3   97006    5299  -2
  -3  12   3   97006    5299   1
   1 -12  -3   83934    4692  -2
  -2  12   3   83934    4692   1
   2 -12  -3   10747    2542  -2
  -1  12   3   10747    2542   1
   3 -12  -3   79940    6469  -2
   0  12   3   79940    6469   1
   4 -12  -3   34766    3139  -2
   1  12   3   34766    3139   1
   5 -12  -3  280292    7221  -2
   2  12   3  280292    7221   1
   6 -12  -3   69636    4974  -2
   3  12   3   69636    4974   1
   7 -12  -3  277283    7075  -2
   4  12   3  277283    7075   1
   8 -12  -3  110257    5065  -2
   5  12   3  110257    5065   1
   9 -12  -3  363211    8172  -2
   6  12   3  363211    8172   1
  10 -12  -3   44910    3465  -2
   7  12   3   44910    3465   1
  11 -12  -3  257446    6976  -2
   8  12   3  257446    6976   1
  12 -12  -3    8668    2463  -2
   9  12   3    8668    2463   1
  13 -12  -3   75122    4563  -2
  10  12   3   75122    4563   1
  14 -12  -3      10    3848  -2
  11  12   3      10    3848   1
  15 -12  -3   46468    3863  -2
  12  12   3   46468    3863   1
  16 -12  -3     795    2398  -2
  13  12   3     795    2398   1
  17 -12  -3    6670    2685  -2
  14  12   3    6670    2685   1
  15  12   3    2997    2349   1
  16  12   3   11761    5896   1
  17  12   3    5113    6402   1
  18  12   3   46102   10009   1
 -20  13   3     184    4641   1
 -19  13   3    6276    4636   1
 -18  13   3   -4094    4094   1
 -14 -13  -3   17696    5012  -2
 -17  13   3   17696    5012   1
 -13 -13  -3   -2436    3653  -2
 -16  13   3   -2436    3653   1
 -12 -13  -3   39662    6068  -2
 -15  13   3   39662    6068   1
 -11 -13  -3   14104    4602  -2
 -14  13   3   14104    4602   1
 -10 -13  -3    5750    3892  -2
 -13  13   3    5750    3892   1
  -9 -13  -3   34786    5741  -2
 -12  13   3   34786    5741   1
  -8 -13  -3   -2501    3768  -2
 -11  13   3   -2501    3768   1
  -7 -13  -3    2790    3773  -2
 -10  13   3    2790    3773   1
  -6 -13  -3   17140    4547  -2
  -9  13   3   17140    4547   1
  -5 -13  -3     506    3203  -2
  -8  13   3     506    3203   1
  -4 -13  -3   36291    5504  -2
  -7  13   3   36291    5504   1
  -3 -13  -3    4237    3399  -2
  -6  13   3    4237    3399   1
  -2 -13  -3   28929    4435  -2
  -5  13   3   28929    4435   1
  -1 -13  -3   58352    5749  -2
  -4  13   3   58352    5749   1
   0 -13  -3    6950    2765  -2
  -3  13   3    6950    2765   1
   1 -13  -3  176019    7330  -2
  -2  13   3  176019    7330   1
   2 -13  -3   15296    3352  -2
  -1  13   3   15296    3352   1
   3 -13  -3   59457    4604  -2
   0  13   3   59457    4604   1
   4 -13  -3    5067    2327  -2
   1  13   3    5067    2327   1
   5 -13  -3    5473    2485  -2
   2  13   3    5473    2485   1
   6 -13  -3    6829    3192  -2
   3  13   3    6829    3192   1
   7 -13  -3    2670    3093  -2
   4  13   3    2670    3093   1
   8 -13  -3   31632    3504  -2
   5  13   3   31632    3504   1
   9 -13  -3    1117    2293  -2
   6  13   3    1117    2293   1
  10 -13  -3    2647    2577  -2
   7  13   3    2647    2577   1
  11 -13  -3   13207    3022  -2
   8  13   3   13207    3022   1
  12 -13  -3   39046    3903  -2
   9  13   3   39046    3903   1
  13 -13  -3   33916    5063  -2
  10  13   3   33916    5063   1
  14 -13  -3    2795    3252  -2
  11  13   3    2795    3252   1
  15 -13  -3    7430    2679  -2
  12  13   3    7430    2679   1
  16 -13  -3    1794    2528  -2
  13  13   3    1794    2528   1
  17 -13  -3    2261    3240  -2
  14  13   3    2261    3240   1
  15  13   3    -262    2722   1
  16  13   3    -209    2864   1
  17  13   3   -9258   17702   1
 -19  14   3    2033    4374   1
 -18  14   3   14070    5758   1
 -14 -14  -3   28381    6159  -2
 -17  14   3   28381    6159   1
 -13 -14  -3   12484    4812  -2
 -16  14   3   12484    4812   1
 -12 -14  -3   10055    4751  -2
 -15  14   3   10055    4751   1
 -11 -14  -3   24103    5386  -2
 -14  14   3   24103    5386   1
 -10 -14  -3   26119    6994  -2
 -13  14   3   26119    6994   1
  -9 -14  -3  107233    9507  -2
 -12  14   3  107233    9507   1
  -8 -14  -3   94375   17766  -2
 -11  14   3   94375   17766   1
  -7 -14  -3  363929   12450  -2
 -10  14   3  363929   12450   1
  -6 -14  -3   51078    6914  -2
  -9  14   3   51078    6914   1
  -5 -14  -3  307063   11417  -2
  -8  14   3  307063   11417   1
  -4 -14  -3   47685    5570  -2
  -7  14   3   47685    5570   1
  -3 -14  -3  223560   10604  -2
  -6  14   3  223560   10604   1
  -2 -14  -3   13208    4154  -2
  -5  14   3   13208    4154   1
  -1 -14  -3  218455   11327  -2
  -4  14   3  218455   11327   1
   0 -14  -3   13316    5378  -2
  -3  14   3   13316    5378   1
   1 -14  -3  155958    9013  -2
  -2  14   3  155958    9013   1
   2 -14  -3   24456    4413  -2
  -1  14   3   24456    4413   1
   3 -14  -3  134648    7165  -2
   0  14   3  134648    7165   1
   4 -14  -3   80008    4951  -2
   1  14   3   80008    4951   1
   5 -14  -3  138372    6857  -2
   2  14   3  138372    6857   1
   6 -14  -3   85495    5779  -2
   3  14   3   85495    5779   1
   7 -14  -3  253316    7489  -2
   4  14   3  253316    7489   1
   8 -14  -3  116076    9589  -2
   5  14   3  116076    9589   1
   9 -14  -3  544969   11080  -2
   6  14   3  544969   11080   1
  10 -14  -3   28729    3226  -2
   7  14   3   28729    3226   1
  11 -14  -3  629390   25562  -2
   8  14   3  629390   25562   1
  12 -14  -3    7878    3982  -2
   9  14   3    7878    3982   1
  13 -14  -3  208079    9870  -2
  10  14   3  208079    9870   1
  14 -14  -3    4617    2705  -2
  11  14   3    4617    2705   1
  15 -14  -3   36531    3872  -2
  12  14   3   36531    3872   1
  16 -14  -3    3940    2676  -2
  13  14   3    3940    2676   1
  17 -14  -3   45255    4546  -2
  14  14   3   45255    4546   1
  15  14   3   -1171    2535   1
  16  14   3   28708    9136   1
 -18  15   3   88023   10107   1
 -14 -15  -3   13407    5293  -2
 -17  15   3   13407    5293   1
 -13 -15  -3  124964    9387  -2
 -16  15   3  124964    9387   1
 -12 -15  -3    -324    4571  -2
 -15  15   3    -324    4571   1
 -11 -15  -3  148746   11827  -2
 -14  15   3  148746   11827   1
 -10 -15  -3    8146    5073  -2
 -13  15   3    8146    5073   1
  -9 -15  -3  218963   11876  -2
 -12  15   3  218963   11876   1
  -8 -15  -3    3891    4165  -2
 -11  15   3    3891    4165   1
  -7 -15  -3  238340   11440  -2
 -10  15   3  238340   11440   1
  -6 -15  -3   35417    5906  -2
  -9  15   3   35417    5906   1
  -5 -15  -3  114528    8362  -2
  -8  15   3  114528    8362   1
  -4 -15  -3   -3810    3810  -2
  -7  15   3   -3810    3810   1
  -3 -15  -3   33765    5533  -2
  -6  15   3   33765    5533   1
  -2 -15  -3   15985    4526  -2
  -5  15   3   15985    4526   1
  -1 -15  -3   64885    6727  -2
  -4  15   3   64885    6727   1
   0 -15  -3   51901    8073  -2
  -3  15   3   51901    8073   1
   1 -15  -3  228801   10257  -2
  -2  15   3  228801   10257   1
   2 -15  -3   11512    6462  -2
  -1  15   3   11512    6462   1
   3 -15  -3   99340   10988  -2
   0  15   3   99340   10988   1
   4 -15  -3   56069    6196  -2
   1  15   3   56069    6196   1
   5 -15  -3    6272    4041  -2
   2  15   3    6272    4041   1
   6 -15  -3    9028    5181  -2
   3  15   3    9028    5181   1
   7 -15  -3    9830    4111  -2
   4  15   3    9830    4111   1
   8 -15  -3    3511    2657  -2
   5  15   3    3511    2657   1
   9 -15  -3    4486    4675  -2
   6  15   3    4486    4675   1
  10 -15  -3   22124    6451  -2
   7  15   3   22124    6451   1
  11 -15  -3    -742    2899  -2
   8  15   3    -742    2899   1
  12 -15  -3   15106    3151  -2
   9  15   3   15106    3151   1
  13 -15  -3    -796    2401  -2
  10  15   3    -796    2401   1
  14 -15  -3   29610    3783  -2
  11  15   3   29610    3783   1
  15 -15  -3    3818    2722  -2
  12  15   3    3818    2722   1
  16 -15  -3   48843    5956  -2
  13  15   3   48843    5956   1
  17 -15  -3   22539    4653  -2
  14  15   3   22539    4653   1
  15  15   3    8653    4807   1
 -14 -16  -3   65738    7497  -2
 -17  16   3   65738    7497   1
 -13 -16  -3   83530    8186  -2
 -16  16   3   83530    8186   1
 -12 -16  -3   79269    8105  -2
 -15  16   3   79269    8105   1
 -11 -16  -3   73848    7861  -2
 -14  16   3   73848    7861   1
 -10 -16  -3    9235    5130  -2
 -13  16   3    9235    5130   1
  -9 -16  -3   85475    8209  -2
 -12  16   3   85475    8209   1
  -8 -16  -3    6446    4500  -2
 -11  16   3    6446    4500   1
  -7 -16  -3   96888    8451  -2
 -10  16   3   96888    8451   1
  -6 -16  -3    7080    4276  -2
  -9  16   3    7080    4276   1
  -5 -16  -3   92415    7970  -2
  -8  16   3   92415    7970   1
  -4 -16  -3   15274    4605  -2
  -7  16   3   15274    4605   1
  -3 -16  -3  255917   11737  -2
  -6  16   3  255917   11737   1
  -2 -16  -3  118920    8789  -2
  -5  16   3  118920    8789   1
  -1 -16  -3  410574   13487  -2
  -4  16   3  410574   13487   1
   0 -16  -3   47227    5737  -2
  -3  16   3   47227    5737   1
   1 -16  -3  297804   11462  -2
  -2  16   3  297804   11462   1
   2 -16  -3   44321    5765  -2
  -1  16   3   44321    5765   1
   3 -16  -3  316093   19442  -2
   0  16   3  316093   19442   1
   4 -16  -3   49594   10099  -2
   1  16   3   49594   10099   1
   5 -16  -3  224483   10290  -2
   2  16   3  224483   10290   1
   6 -16  -3   41478    5128  -2
   3  16   3   41478    5128   1
   7 -16  -3  148553    9156  -2
   4  16   3  148553    9156   1
   8 -16  -3   34871    5506  -2
   5  16   3   34871    5506   1
   9 -16  -3  193065   10582  -2
   6  16   3  193065   10582   1
  10 -16  -3   14598    5323  -2
   7  16   3   14598    5323   1
  11 -16  -3  192278   10983  -2
   8  16   3  192278   10983   1
  12 -16  -3    8522    4269  -2
   9  16   3    8522    4269   1
  13 -16  -3  113494    7454  -2
  10  16   3  113494    7454   1
  14 -16  -3    7914    3156  -2
  11  16   3    7914    3156   1
  15 -16  -3  179443   11577  -2
  12  16   3  179443   11577   1
  16 -16  -3   11153    3206  -2
  13  16   3   11153    3206   1
  17 -16  -3   82933    9377  -2
  14  16   3   82933    9377   1
 -13 -17  -3   27944    6583  -2
 -16  17   3   27944    6583   1
 -12 -17  -3   57614   11175  -2
 -15  17   3   57614   11175   1
 -11 -17  -3   45885    7120  -2
 -14  17   3   45885    7120   1
 -10 -17  -3   44952    6803  -2
 -13  17   3   44952    6803   1
  -9 -17  -3   -4088    4088  -2
 -12  17   3   -4088    4088   1
  -8 -17  -3    7693    4863  -2
 -11  17   3    7693    4863   1
  -7 -17  -3   -3591    3591  -2
 -10  17   3   -3591    3591   1
  -6 -17  -3   -3566    3566  -2
  -9  17   3   -3566    3566   1
  -5 -17  -3   -5329    5329  -2
  -8  17   3   -5329    5329   1
  -4 -17  -3   19146    5293  -2
  -7  17   3   19146    5293   1
  -3 -17  -3    8555    4323  -2
  -6  17   3    8555    4323   1
  -2 -17  -3    1079    3984  -2
  -5  17   3    1079    3984   1
  -1 -17  -3    7352    4295  -2
  -4  17   3    7352    4295   1
   0 -17  -3    4980    4160  -2
  -3  17   3    4980    4160   1
   1 -17  -3   11118    4505  -2
  -2  17   3   11118    4505   1
   2 -17  -3     974    3763  -2
  -1  17   3     974    3763   1
   3 -17  -3    4413    3824  -2
   0  17   3    4413    3824   1
   4 -17  -3   79151   10079  -2
   1  17   3   79151   10079   1
   5 -17  -3   20573    6417  -2
   2  17   3   20573    6417   1
   6 -17  -3   88454    7752  -2
   3  17   3   88454    7752   1
   7 -17  -3   18908    4802  -2
   4  17   3   18908    4802   1
   8 -17  -3    3013    4026  -2
   5  17   3    3013    4026   1
   9 -17  -3   11440    4235  -2
   6  17   3   11440    4235   1
  10 -17  -3    -278    5247  -2
   7  17   3    -278    5247   1
  11 -17  -3   -3120    3914  -2
   8  17   3   -3120    3914   1
  12 -17  -3    4924    5290  -2
   9  17   3    4924    5290   1
  13 -17  -3   -1325    3996  -2
  10  17   3   -1325    3996   1
  14 -17  -3   10316    4454  -2
  11  17   3   10316    4454   1
  15 -17  -3   -1202    3722  -2
  12  17   3   -1202    3722   1
  16 -17  -3    1997    4204  -2
  13  17   3    1997    4204   1
 -11 -18  -3     727    4580  -2
 -14  18   3     727    4580   1
 -10 -18  -3   -4119    4119  -2
 -13  18   3   -4119    4119   1
  -9 -18  -3      65    4561  -2
 -12  18   3      65    4561   1
  -8 -18  -3    7033    9169  -2
 -11  18   3    7033    9169   1
  -7 -18  -3   64781    8671  -2
 -10  18   3   64781    8671   1
  -6 -18  -3    6793    9022  -2
  -9  18   3    6793    9022   1
  -5 -18  -3   98768    8724  -2
  -8  18   3   98768    8724   1
  -4 -18  -3   17115    8299  -2
  -7  18   3   17115    8299   1
  -3 -18  -3   56960    7002  -2
  -6  18   3   56960    7002   1
  -2 -18  -3  149358   10295  -2
  -5  18   3  149358   10295   1
  -1 -18  -3   64846    7506  -2
  -4  18   3   64846    7506   1
   0 -18  -3   89917    8267  -2
  -3  18   3   89917    8267   1
   1 -18  -3   98718    8936  -2
  -2  18   3   98718    8936   1
   2 -18  -3    2686    4150  -2
  -1  18   3    2686    4150   1
   3 -18  -3  137334    9834  -2
   0  18   3  137334    9834   1
   4 -18  -3    7543    3878  -2
   1  18   3    7543    3878   1
   5 -18  -3  134363   15483  -2
   2  18   3  134363   15483   1
   6 -18  -3   12297    6263  -2
   3  18   3   12297    6263   1
   7 -18  -3  102977    9307  -2
   4  18   3  102977    9307   1
   8 -18  -3   12645    4501  -2
   5  18   3   12645    4501   1
   9 -18  -3  123338   19416  -2
   6  18   3  123338   19416   1
  10 -18  -3   20851    6650  -2
   7  18   3   20851    6650   1
  11 -18  -3   77426    7990  -2
   8  18   3   77426    7990   1
  12 -18  -3    8720    4627  -2
   9  18   3    8720    4627   1
  13 -18  -3    5325    4564  -2
  10  18   3    5325    4564   1
  14 -18  -3   -1884    4105  -2
  11  18   3   -1884    4105   1
  -9 -19  -3   35345    6481  -2
 -12  19   3   35345    6481   1
  -8 -19  -3    1614    4840  -2
 -11  19   3    1614    4840   1
  -7 -19  -3  133906   10986  -2
 -10  19   3  133906   10986   1
  -6 -19  -3    5242    4982  -2
  -9  19   3    5242    4982   1
  -5 -19  -3   84165    8498  -2
  -8  19   3   84165    8498   1
  -4 -19  -3   11637    5205  -2
  -7  19   3   11637    5205   1
  -3 -19  -3   37930    7029  -2
  -6  19   3   37930    7029   1
  -2 -19  -3    -475    4536  -2
  -5  19   3    -475    4536   1
  -1 -19  -3   41906    7404  -2
  -4  19   3   41906    7404   1
   0 -19  -3   10182    5200  -2
  -3  19   3   10182    5200   1
   1 -19  -3   13761    5025  -2
  -2  19   3   13761    5025   1
   2 -19  -3   10370    4705  -2
  -1  19   3   10370    4705   1
   3 -19  -3    4258    4170  -2
   0  19   3    4258    4170   1
   4 -19  -3   10161    4573  -2
   1  19   3   10161    4573   1
   5 -19  -3    1607    4669  -2
   2  19   3    1607    4669   1
   6 -19  -3    1904    8746  -2
   3  19   3    1904    8746   1
   7 -19  -3    3076    6090  -2
   4  19   3    3076    6090   1
   8 -19  -3    3563    6043  -2
   5  19   3    3563    6043   1
   9 -19  -3   11015    5960  -2
   6  19   3   11015    5960   1
  10 -19  -3   22485    5635  -2
   7  19   3   22485    5635   1
  11 -19  -3   -3982    3982  -2
   8  19   3   -3982    3982   1
  12 -19  -3     146    4631  -2
   9  19   3     146    4631   1
  -7 -20  -3   67520   10220  -2
 -10  20   3   67520   10220   1
  -6 -20  -3   28565    7761  -2
  -9  20   3   28565    7761   1
  -5 -20  -3   69360    9519  -2
  -8  20   3   69360    9519   1
  -4 -20  -3    2837    5713  -2
  -7  20   3    2837    5713   1
  -3 -20  -3  103804   10670  -2
  -6  20   3  103804   10670   1
  -2 -20  -3   16752    6398  -2
  -5  20   3   16752    6398   1
  -1 -20  -3  191125   20107  -2
  -4  20   3  191125   20107   1
   0 -20  -3   16096    7940  -2
  -3  20   3   16096    7940   1
   1 -20  -3  254636   14404  -2
  -2  20   3  254636   14404   1
   2 -20  -3   57447    6903  -2
  -1  20   3   57447    6903   1
   3 -20  -3  288753   21835  -2
   0  20   3  288753   21835   1
   4 -20  -3   82220    9784  -2
   1  20   3   82220    9784   1
   5 -20  -3  176148   13682  -2
   2  20   3  176148   13682   1
   6 -20  -3   30275    6003  -2
   3  20   3   30275    6003   1
   7 -20  -3  166563   17106  -2
   4  20   3  166563   17106   1
   9 -20  -3  150178   27215  -2
   6  20   3  150178   27215   1
  10 -20  -3   10369    8999  -2
   7  20   3   10369    8999   1
  -4 -21  -3    3271    4942  -2
  -7  21   3    3271    4942   1
  -3 -21  -3    6250    5040  -2
  -6  21   3    6250    5040   1
  -2 -21  -3    2382    4734  -2
  -5  21   3    2382    4734   1
  -1 -21  -3    1215    4539  -2
  -4  21   3    1215    4539   1
   0 -21  -3    3070    4946  -2
  -3  21   3    3070    4946   1
   1 -21  -3    2620    5784  -2
  -2  21   3    2620    5784   1
   2 -21  -3    3435    4833  -2
  -1  21   3    3435    4833   1
   3 -21  -3    8750    5181  -2
   0  21   3    8750    5181   1
   4 -21  -3   -2168    5150  -2
   1  21   3   -2168    5150   1
   5 -21  -3   -1246    5332  -2
   2  21   3   -1246    5332   1
   6 -21  -3    7914    5143  -2
   3  21   3    7914    5143   1
   7 -21  -3   -1359    4170  -2
   4  21   3   -1359    4170   1
 -25   0   4    6906    6778   1
 -24   0   4  156370   14864   1
 -23   0   4   12302    7160   1
 -22   0   4  272009   19057   1
 -21   0   4   35133    8759   1
 -20   0   4  363063   17960   1
 -19   0   4   36711    8207   1
 -18   0   4  510239   17498   1
 -13   0  -4   85598    7115  -2
 -17   0   4   85598    7115   1
 -12   0  -4  595147   18835  -2
 -16   0   4  595147   18835   1
 -11   0  -4   22795    4202  -2
 -15   0   4   22795    4202   1
 -10   0  -4  560521   22841  -2
 -14   0   4  560521   22841   1
  -9   0  -4  265608    8683  -2
 -13   0   4  265608    8683   1
  -8   0  -4  491589   11774  -2
 -12   0   4  491589   11774   1
  -7   0  -4  147838   22744  -2
 -11   0   4  147838   22744   1
  -6   0  -4  773339   14855  -2
 -10   0   4  773339   14855   1
  -5   0  -4  343751    8844  -2
  -9   0   4  343751    8844   1
  -4   0  -4  650887   12544  -2
  -8   0   4  650887   12544   1
  -3   0  -4   70692    4207  -2
  -7   0   4   70692    4207   1
  -2   0  -4 1288058   19754  -2
  -6   0   4 1288058   19754   1
  -1   0  -4   81998    6092  -2
  -5   0   4   81998    6092   1
   0   0  -4 1193001   17833  -2
  -4   0   4 1193001   17833   1
   1   0  -4  110455    5426  -2
  -3   0   4  110455    5426   1
   2   0  -4    6275    2364  -2
  -2   0   4    6275    2364   1
   3   0  -4   79534    5482  -2
  -1   0   4   79534    5482   1
   4   0  -4  683380   10147  -2
   0   0   4  683380   10147   1
   5   0  -4   17593    1532  -2
   1   0   4   17593    1532   1
   6   0  -4  555724    8115  -2
   2   0   4  555724    8115   1
   7   0  -4   49780    1937  -2
   3   0   4   49780    1937   1
   8   0  -4  265282    7456  -2
   4   0   4  265282    7456   1
   9   0  -4  156201    4969  -2
   5   0   4  156201    4969   1
  10   0  -4  272772    7145  -2
   6   0   4  272772    7145   1
  11   0  -4  504587    8173  -2
   7   0   4  504587    8173   1
  12   0  -4  401184   10015  -2
   8   0   4  401184   10015   1
  13   0  -4  675389   10829  -2
   9   0   4  675389   10829   1
  14   0  -4  238986    6297  -2
  10   0   4  238986    6297   1
  15   0  -4    7779    2451  -2
  11   0   4    7779    2451   1
  16   0  -4   96810    6119  -2
  12   0   4   96810    6119   1
  17   0  -4    3145    2319  -2
  13   0   4    3145    2319   1
  14   0   4  164720   11324   1
  15   0   4   13955    2802   1
  16   0   4   51963    6940   1
  17   0   4   55468    4445   1
  18   0   4   23016    4040   1
  19   0   4   45325    3975   1
  20   0   4    1906    2718   1
  21   0   4    2126    2289   1
 -25   1   4    9969    5121   1
 -24   1   4   15201    5859   1
 -23   1   4   63106    9090   1
 -22   1   4   19646    5025   1
 -21   1   4   75154    7469   1
 -20   1   4   31944    5554   1
 -19   1   4    5944    3209   1
 -18   1   4   34368    3430   1
 -13  -1  -4    8682    2906  -2
 -17   1   4    8682    2906   1
 -12  -1  -4   52572    4243  -2
 -16   1   4   52572    4243   1
 -11  -1  -4   11181    2629  -2
 -15   1   4   11181    2629   1
 -10  -1  -4   46141    3242  -2
 -14   1   4   46141    3242   1
  -9  -1  -4  189376    5305  -2
 -13   1   4  189376    5305   1
  -8  -1  -4   47263    3124  -2
 -12   1   4   47263    3124   1
  -7  -1  -4  158683    5089  -2
 -11   1   4  158683    5089   1
  -6  -1  -4  179076    4764  -2
 -10   1   4  179076    4764   1
  -5  -1  -4   82131    4054  -2
  -9   1   4   82131    4054   1
  -4  -1  -4  800902   10238  -2
  -8   1   4  800902   10238   1
  -3  -1  -4  201648    4463  -2
  -7   1   4  201648    4463   1
  -2  -1  -4 1160256   14351  -2
  -6   1   4 1160256   14351   1
  -1  -1  -4  171959    5745  -2
  -5   1   4  171959    5745   1
   0  -1  -4  762507    8921  -2
  -4   1   4  762507    8921   1
   1  -1  -4    5043    1758  -2
  -3   1   4    5043    1758   1
   2  -1  -4   88327    3940  -2
  -2   1   4   88327    3940   1
   3  -1  -4    4650    1238  -2
  -1   1   4    4650    1238   1
   4  -1  -4  936376    9419  -2
   0   1   4  936376    9419   1
   5  -1  -4  288062    3647  -2
   1   1   4  288062    3647   1
   6  -1  -4 1628660   21630  -2
   2   1   4 1628660   21630   1
   7  -1  -4  153328    3691  -2
   3   1   4  153328    3691   1
   8  -1  -4 1161641   19838  -2
   4   1   4 1161641   19838   1
   9  -1  -4   67351    3969  -2
   5   1   4   67351    3969   1
  10  -1  -4  489357    8343  -2
   6   1   4  489357    8343   1
  11  -1  -4   40502    2482  -2
   7   1   4   40502    2482   1
  12  -1  -4  144645    4470  -2
   8   1   4  144645    4470   1
  13  -1  -4   46123    4262  -2
   9   1   4   46123    4262   1
  14  -1  -4  139564    4441  -2
  10   1   4  139564    4441   1
  15  -1  -4   14825    2978  -2
  11   1   4   14825    2978   1
  16  -1  -4  260832    4552  -2
  12   1   4  260832    4552   1
  17  -1  -4   74735    3676  -2
  13   1   4   74735    3676   1
  14   1   4  209886    6164   1
  15   1   4   14767    1981   1
  16   1   4  124759    3894   1
  17   1   4    1275    2157   1
  18   1   4  167339    4920   1
  19   1   4    4212    3178   1
  20   1   4   58296   20046   1
  21   1   4    -596    1943   1
 -25   2   4    9272    5015   1
 -24   2   4    4453    5384   1
 -23   2   4   -4158    4321   1
 -22   2   4    8324    4524   1
 -21   2   4    5768    4577   1
 -20   2   4     179    4903   1
 -19   2   4    1604    3070   1
 -18   2   4    4606    3174   1
 -13  -2  -4   25016    3666  -2
 -17   2   4   25016    3666   1
 -12  -2  -4   -1439    2161  -2
 -16   2   4   -1439    2161   1
 -11  -2  -4   12366    2526  -2
 -15   2   4   12366    2526   1
 -10  -2  -4    -303    1910  -2
 -14   2   4    -303    1910   1
  -9  -2  -4   32338    3019  -2
 -13   2   4   32338    3019   1
  -8  -2  -4    3527    2109  -2
 -12   2   4    3527    2109   1
  -7  -2  -4   17751    2313  -2
 -11   2   4   17751    2313   1
  -6  -2  -4  185528    4860  -2
 -10   2   4  185528    4860   1
  -5  -2  -4    3551    1697  -2
  -9   2   4    3551    1697   1
  -4  -2  -4  230480    4963  -2
  -8   2   4  230480    4963   1
  -3  -2  -4  244787    4863  -2
  -7   2   4  244787    4863   1
  -2  -2  -4  136238   15079  -2
  -6   2   4  136238   15079   1
  -1  -2  -4  267340    6263  -2
  -5   2   4  267340    6263   1
   0  -2  -4    1688    1647  -2
  -4   2   4    1688    1647   1
   1  -2  -4  106506    3237  -2
  -3   2   4  106506    3237   1
   2  -2  -4 1022225   10803  -2
  -2   2   4 1022225   10803   1
   3  -2  -4  217508    4328  -2
  -1   2   4  217508    4328   1
   4  -2  -4   10184    1192  -2
   0   2   4   10184    1192   1
   5  -2  -4  127122    4930  -2
   1   2   4  127122    4930   1
   6  -2  -4   40239    2448  -2
   2   2   4   40239    2448   1
   7  -2  -4  328629    6537  -2
   3   2   4  328629    6537   1
   8  -2  -4   77813    3228  -2
   4   2   4   77813    3228   1
   9  -2  -4   -1503    1884  -2
   5   2   4   -1503    1884   1
  10  -2  -4   64885    3240  -2
   6   2   4   64885    3240   1
  11  -2  -4   31920    3568  -2
   7   2   4   31920    3568   1
  12  -2  -4    6949    1974  -2
   8   2   4    6949    1974   1
  13  -2  -4   -1119    1926  -2
   9   2   4   -1119    1926   1
  14  -2  -4     984    2085  -2
  10   2   4     984    2085   1
  15  -2  -4   78995    4526  -2
  11   2   4   78995    4526   1
  16  -2  -4    4696    2501  -2
  12   2   4    4696    2501   1
  17  -2  -4   18099    3249  -2
  13   2   4   18099    3249   1
  14   2   4    2452    2629   1
  15   2   4    2594    2893   1
  16   2   4    1906    4090   1
  17   2   4   17500    3565   1
  18   2   4   -1564    3045   1
  19   2   4   15759    4050   1
  20   2   4     994    3873   1
  21   2   4    -655    3327   1
 -25   3   4    6846    4895   1
 -24   3   4   10394    5153   1
 -23   3   4    -421    4696   1
 -22   3   4   -1237    5987   1
 -21   3   4    9551    4621   1
 -20   3   4   19293    6398   1
 -19   3   4   28531    4130   1
 -18   3   4    9318    3222   1
 -13  -3  -4   66476    4360  -2
 -17   3   4   66476    4360   1
 -12  -3  -4   18821    2928  -2
 -16   3   4   18821    2928   1
 -11  -3  -4  134432    5649  -2
 -15   3   4  134432    5649   1
 -10  -3  -4   48166    3745  -2
 -14   3   4   48166    3745   1
  -9  -3  -4    1803    1870  -2
 -13   3   4    1803    1870   1
  -8  -3  -4   37616    2910  -2
 -12   3   4   37616    2910   1
  -7  -3  -4   60900    4642  -2
 -11   3   4   60900    4642   1
  -6  -3  -4   40593    2940  -2
 -10   3   4   40593    2940   1
  -5  -3  -4   10131    1912  -2
  -9   3   4   10131    1912   1
  -4  -3  -4   25434    2249  -2
  -8   3   4   25434    2249   1
  -3  -3  -4  180953    4292  -2
  -7   3   4  180953    4292   1
  -2  -3  -4  307048    5389  -2
  -6   3   4  307048    5389   1
  -1  -3  -4  189040    4055  -2
  -5   3   4  189040    4055   1
   0  -3  -4  359006    5563  -2
  -4   3   4  359006    5563   1
   1  -3  -4  514357    6880  -2
  -3   3   4  514357    6880   1
   2  -3  -4  430734    7070  -2
  -2   3   4  430734    7070   1
   3  -3  -4  534821    6846  -2
  -1   3   4  534821    6846   1
   4  -3  -4  421837    6008  -2
   0   3   4  421837    6008   1
   5  -3  -4  289442    4017  -2
   1   3   4  289442    4017   1
   6  -3  -4  376604    4924  -2
   2   3   4  376604    4924   1
   7  -3  -4  214879    7476  -2
   3   3   4  214879    7476   1
   8  -3  -4   61392    3384  -2
   4   3   4   61392    3384   1
   9  -3  -4   32594    2778  -2
   5   3   4   32594    2778   1
  10  -3  -4   68168    6326  -2
   6   3   4   68168    6326   1
  11  -3  -4    6624    2066  -2
   7   3   4    6624    2066   1
  12  -3  -4  112935    4837  -2
   8   3   4  112935    4837   1
  13  -3  -4    -178    2120  -2
   9   3   4    -178    2120   1
  14  -3  -4  238448    6990  -2
  10   3   4  238448    6990   1
  15  -3  -4   33328    3458  -2
  11   3   4   33328    3458   1
  16  -3  -4  147071    6422  -2
  12   3   4  147071    6422   1
  17  -3  -4    3742    2809  -2
  13   3   4    3742    2809   1
  14   3   4   50895    4622   1
  15   3   4    8300    3316   1
  16   3   4   49175    4725   1
  17   3   4    1908    3269   1
  18   3   4   84172    8512   1
  19   3   4    3296    3414   1
  20   3   4   29468   33984   1
  21   3   4   -2429    3546   1
 -24   4   4  149039    9977   1
 -23   4   4    6631    4729   1
 -22   4   4  196480   11045   1
 -21   4   4   12320    4375   1
 -20   4   4  197437   11572   1
 -19   4   4   10467    3315   1
 -18   4   4  289285    8535   1
 -13  -4  -4   19345    3347  -2
 -17   4   4   19345    3347   1
 -12  -4  -4  502440   10967  -2
 -16   4   4  502440   10967   1
 -11  -4  -4   38901    3233  -2
 -15   4   4   38901    3233   1
 -10  -4  -4  514729    9042  -2
 -14   4   4  514729    9042   1
  -9  -4  -4   57905    3785  -2
 -13   4   4   57905    3785   1
  -8  -4  -4  506394    8578  -2
 -12   4   4  506394    8578   1
  -7  -4  -4     659    1816  -2
 -11   4   4     659    1816   1
  -6  -4  -4  296817    6308  -2
 -10   4   4  296817    6308   1
  -5  -4  -4   25156    2339  -2
  -9   4   4   25156    2339   1
  -4  -4  -4 1202292   14057  -2
  -8   4   4 1202292   14057   1
  -3  -4  -4   11478    1763  -2
  -7   4   4   11478    1763   1
  -2  -4  -4 1153376   13160  -2
  -6   4   4 1153376   13160   1
  -1  -4  -4   15818    1724  -2
  -5   4   4   15818    1724   1
   0  -4  -4  845041   10349  -2
  -4   4   4  845041   10349   1
   1  -4  -4   55059    2486  -2
  -3   4   4   55059    2486   1
   2  -4  -4 2340935   22555  -2
  -2   4   4 2340935   22555   1
   3  -4  -4   25885    2165  -2
  -1   4   4   25885    2165   1
   4  -4  -4  862433   11217  -2
   0   4   4  862433   11217   1
   5  -4  -4   71315    2994  -2
   1   4   4   71315    2994   1
   6  -4  -4  716354    7887  -2
   2   4   4  716354    7887   1
   7  -4  -4   12403    1225  -2
   3   4   4   12403    1225   1
   8  -4  -4  841150   13870  -2
   4   4   4  841150   13870   1
   9  -4  -4   42903    3313  -2
   5   4   4   42903    3313   1
  10  -4  -4  214715    6181  -2
   6   4   4  214715    6181   1
  11  -4  -4    1510    1923  -2
   7   4   4    1510    1923   1
  12  -4  -4  270504    7415  -2
   8   4   4  270504    7415   1
  13  -4  -4   29646    3274  -2
   9   4   4   29646    3274   1
  14  -4  -4  123168   34213  -2
  10   4   4  123168   34213   1
  15  -4  -4   47579    7395  -2
  11   4   4   47579    7395   1
  16  -4  -4  116196   21604  -2
  12   4   4  116196   21604   1
  17  -4  -4   19023    3726  -2
  13   4   4   19023    3726   1
  14   4   4   81445    5653   1
  15   4   4  106811    6625   1
  16   4   4   62471    6215   1
  17   4   4   63911    8243   1
  18   4   4   15179    3926   1
  19   4   4   39765   11492   1
  20   4   4   20846    6105   1
  21   4   4   21503    8942   1
 -24   5   4   47570    6352   1
 -23   5   4   34555    6273   1
 -22   5   4   10011    4555   1
 -21   5   4   45509    6228   1
 -20   5   4   30477    5209   1
 -19   5   4   19887    3684   1
 -18   5   4   13763    3211   1
 -13  -5  -4    8282    3288  -2
 -17   5   4    8282    3288   1
 -12  -5  -4  105515    7833  -2
 -16   5   4  105515    7833   1
 -11  -5  -4   41793    3566  -2
 -15   5   4   41793    3566   1
 -10  -5  -4  148965    6198  -2
 -14   5   4  148965    6198   1
  -9  -5  -4   25762    2796  -2
 -13   5   4   25762    2796   1
  -8  -5  -4   29946    3099  -2
 -12   5   4   29946    3099   1
  -7  -5  -4   24707    2490  -2
 -11   5   4   24707    2490   1
  -6  -5  -4    3266    1719  -2
 -10   5   4    3266    1719   1
  -5  -5  -4    7729    2087  -2
  -9   5   4    7729    2087   1
  -4  -5  -4   46191    2693  -2
  -8   5   4   46191    2693   1
  -3  -5  -4   66928    3177  -2
  -7   5   4   66928    3177   1
  -2  -5  -4  577428    8221  -2
  -6   5   4  577428    8221   1
  -1  -5  -4  713514    9271  -2
  -5   5   4  713514    9271   1
   0  -5  -4 1031150   11933  -2
  -4   5   4 1031150   11933   1
   1  -5  -4  206513    4215  -2
  -3   5   4  206513    4215   1
   2  -5  -4  360631    5589  -2
  -2   5   4  360631    5589   1
   3  -5  -4  129782    3324  -2
  -1   5   4  129782    3324   1
   4  -5  -4 1367058   14146  -2
   0   5   4 1367058   14146   1
   5  -5  -4  731343    8507  -2
   1   5   4  731343    8507   1
   6  -5  -4  980399   10916  -2
   2   5   4  980399   10916   1
   7  -5  -4   50371    2490  -2
   3   5   4   50371    2490   1
   8  -5  -4  169717    3153  -2
   4   5   4  169717    3153   1
   9  -5  -4    6568    2273  -2
   5   5   4    6568    2273   1
  10  -5  -4   60831    8162  -2
   6   5   4   60831    8162   1
  11  -5  -4   19114    4038  -2
   7   5   4   19114    4038   1
  12  -5  -4  199202    6688  -2
   8   5   4  199202    6688   1
  13  -5  -4    4372    2497  -2
   9   5   4    4372    2497   1
  14  -5  -4  424610   10336  -2
  10   5   4  424610   10336   1
  15  -5  -4   24966    3699  -2
  11   5   4   24966    3699   1
  16  -5  -4  597139   13279  -2
  12   5   4  597139   13279   1
  17  -5  -4    2497    3089  -2
  13   5   4    2497    3089   1
  14   5   4  198667   12231   1
  15   5   4    5551    3481   1
  16   5   4  158700   12138   1
  17   5   4   10600    4456   1
  18   5   4  163180   16299   1
  19   5   4    7613    6462   1
  20   5   4  163921   13250   1
 -24   6   4   33704    6166   1
 -23   6   4   -3890    3890   1
 -22   6   4   30428    5730   1
 -21   6   4   -2314    4828   1
 -20   6   4   20349    5041   1
 -19   6   4   14235    3555   1
 -18   6   4    4071    3638   1
 -13  -6  -4   -1717    2770  -2
 -17   6   4   -1717    2770   1
 -12  -6  -4   41707    5099  -2
 -16   6   4   41707    5099   1
 -11  -6  -4   50605    4511  -2
 -15   6   4   50605    4511   1
 -10  -6  -4   54570    3720  -2
 -14   6   4   54570    3720   1
  -9  -6  -4    -396    1884  -2
 -13   6   4    -396    1884   1
  -8  -6  -4     649    1932  -2
 -12   6   4     649    1932   1
  -7  -6  -4    4540    2043  -2
 -11   6   4    4540    2043   1
  -6  -6  -4   69962    3580  -2
 -10   6   4   69962    3580   1
  -5  -6  -4  131855    6646  -2
  -9   6   4  131855    6646   1
  -4  -6  -4  175074    5326  -2
  -8   6   4  175074    5326   1
  -3  -6  -4   81569    3612  -2
  -7   6   4   81569    3612   1
  -2  -6  -4  501297    7720  -2
  -6   6   4  501297    7720   1
  -1  -6  -4  175699    4338  -2
  -5   6   4  175699    4338   1
   0  -6  -4  136403    3773  -2
  -4   6   4  136403    3773   1
   1  -6  -4   19656    1891  -2
  -3   6   4   19656    1891   1
   2  -6  -4  307724    5305  -2
  -2   6   4  307724    5305   1
   3  -6  -4    1743    1252  -2
  -1   6   4    1743    1252   1
   4  -6  -4  206637    4158  -2
   0   6   4  206637    4158   1
   5  -6  -4   24596    2026  -2
   1   6   4   24596    2026   1
   6  -6  -4  418461    5994  -2
   2   6   4  418461    5994   1
   7  -6  -4   16295    1571  -2
   3   6   4   16295    1571   1
   8  -6  -4   83757    3154  -2
   4   6   4   83757    3154   1
   9  -6  -4   65566    2833  -2
   5   6   4   65566    2833   1
  10  -6  -4   95629    3892  -2
   6   6   4   95629    3892   1
  11  -6  -4    7410    2611  -2
   7   6   4    7410    2611   1
  12  -6  -4   -2261    2261  -2
   8   6   4   -2261    2261   1
  13  -6  -4    1378    2606  -2
   9   6   4    1378    2606   1
  14  -6  -4    8471    3080  -2
  10   6   4    8471    3080   1
  15  -6  -4    1737    2847  -2
  11   6   4    1737    2847   1
  16  -6  -4    1908    4997  -2
  12   6   4    1908    4997   1
  17  -6  -4    -109    3390  -2
  13   6   4    -109    3390   1
  14   6   4   47130    4972   1
  15   6   4   39516    5983   1
  16   6   4    6142    4270   1
  17   6   4   23086    6872   1
  18   6   4   -2280    5210   1
  19   6   4   17091    6734   1
  20   6   4   -1741    5199   1
 -24   7   4    8623    4749   1
 -23   7   4    6767    5278   1
 -22   7   4   12245    4933   1
 -21   7   4     600    4236   1
 -20   7   4    2249    3982   1
 -19   7   4    9950    4527   1
 -18   7   4    5764    3272   1
 -13  -7  -4   30500    4247  -2
 -17   7   4   30500    4247   1
 -12  -7  -4    8576    3016  -2
 -16   7   4    8576    3016   1
 -11  -7  -4    1403    2607  -2
 -15   7   4    1403    2607   1
 -10  -7  -4    4615    2485  -2
 -14   7   4    4615    2485   1
  -9  -7  -4    1856    2028  -2
 -13   7   4    1856    2028   1
  -8  -7  -4   21039    2605  -2
 -12   7   4   21039    2605   1
  -7  -7  -4   99707    4398  -2
 -11   7   4   99707    4398   1
  -6  -7  -4   37492    3118  -2
 -10   7   4   37492    3118   1
  -5  -7  -4   21219    2359  -2
  -9   7   4   21219    2359   1
  -4  -7  -4    3068    1823  -2
  -8   7   4    3068    1823   1
  -3  -7  -4  144552    4863  -2
  -7   7   4  144552    4863   1
  -2  -7  -4   54065    3171  -2
  -6   7   4   54065    3171   1
  -1  -7  -4  143846    4133  -2
  -5   7   4  143846    4133   1
   0  -7  -4  159946    4838  -2
  -4   7   4  159946    4838   1
   1  -7  -4     972    1440  -2
  -3   7   4     972    1440   1
   2  -7  -4  309948    5578  -2
  -2   7   4  309948    5578   1
   3  -7  -4    4758    1564  -2
  -1   7   4    4758    1564   1
   4  -7  -4   50821    2520  -2
   0   7   4   50821    2520   1
   5  -7  -4  172296    4019  -2
   1   7   4  172296    4019   1
   6  -7  -4   90526    3234  -2
   2   7   4   90526    3234   1
   7  -7  -4   49983    4055  -2
   3   7   4   49983    4055   1
   8  -7  -4   22513    2195  -2
   4   7   4   22513    2195   1
   9  -7  -4   45302    2263  -2
   5   7   4   45302    2263   1
  10  -7  -4  145048    3428  -2
   6   7   4  145048    3428   1
  11  -7  -4  209609    5885  -2
   7   7   4  209609    5885   1
  12  -7  -4   95606    4415  -2
   8   7   4   95606    4415   1
  13  -7  -4    9845    3085  -2
   9   7   4    9845    3085   1
  14  -7  -4   37912    5837  -2
  10   7   4   37912    5837   1
  15  -7  -4   23662    4154  -2
  11   7   4   23662    4154   1
  16  -7  -4   53915    5314  -2
  12   7   4   53915    5314   1
  17  -7  -4   23650    5280  -2
  13   7   4   23650    5280   1
  14   7   4   73869    8405   1
  15   7   4    5327    5286   1
  16   7   4   45509    8235   1
  17   7   4    7809    6510   1
  18   7   4   16599    6932   1
  19   7   4     123    5064   1
  20   7   4   -1674    8110   1
 -23   8   4    1220    4240   1
 -22   8   4  137406    9551   1
 -21   8   4   19466    7126   1
 -20   8   4  142941   11854   1
 -19   8   4    -279    4090   1
 -18   8   4  220694    8988   1
 -13  -8  -4   13026    4042  -2
 -17   8   4   13026    4042   1
 -12  -8  -4  466903   10956  -2
 -16   8   4  466903   10956   1
 -11  -8  -4   53112    4669  -2
 -15   8   4   53112    4669   1
 -10  -8  -4  243226    7518  -2
 -14   8   4  243226    7518   1
  -9  -8  -4   33903    4735  -2
 -13   8   4   33903    4735   1
  -8  -8  -4  287652    6735  -2
 -12   8   4  287652    6735   1
  -7  -8  -4    3223    2106  -2
 -11   8   4    3223    2106   1
  -6  -8  -4  390407    7530  -2
 -10   8   4  390407    7530   1
  -5  -8  -4   12714    2143  -2
  -9   8   4   12714    2143   1
  -4  -8  -4  387540    7217  -2
  -8   8   4  387540    7217   1
  -3  -8  -4  231692    5471  -2
  -7   8   4  231692    5471   1
  -2  -8  -4  373815    6914  -2
  -6   8   4  373815    6914   1
  -1  -8  -4  530743    8311  -2
  -5   8   4  530743    8311   1
   0  -8  -4 1483411   16756  -2
  -4   8   4 1483411   16756   1
   1  -8  -4    8515    1795  -2
  -3   8   4    8515    1795   1
   2  -8  -4  443644    7788  -2
  -2   8   4  443644    7788   1
   3  -8  -4    8763    1701  -2
  -1   8   4    8763    1701   1
   4  -8  -4 1274438   14508  -2
   0   8   4 1274438   14508   1
   5  -8  -4  302567    5618  -2
   1   8   4  302567    5618   1
   6  -8  -4  218747    5475  -2
   2   8   4  218747    5475   1
   7  -8  -4  368015    7163  -2
   3   8   4  368015    7163   1
   8  -8  -4  317543    5523  -2
   4   8   4  317543    5523   1
   9  -8  -4     372    1364  -2
   5   8   4     372    1364   1
  10  -8  -4  160744    4820  -2
   6   8   4  160744    4820   1
  11  -8  -4    1470    1420  -2
   7   8   4    1470    1420   1
  12  -8  -4  130258    4476  -2
   8   8   4  130258    4476   1
  13  -8  -4   28004    2064  -2
   9   8   4   28004    2064   1
  14  -8  -4   58029    5207  -2
  10   8   4   58029    5207   1
  15  -8  -4    7058    3840  -2
  11   8   4    7058    3840   1
  16  -8  -4   56588    6042  -2
  12   8   4   56588    6042   1
  17  -8  -4   96758   10478  -2
  13   8   4   96758   10478   1
  14   8   4   -1806    4836   1
  15   8   4   13015    8614   1
  16   8   4   33044    7695   1
  17   8   4    8709    6179   1
  18   8   4   26075   15973   1
  19   8   4   18835   14749   1
 -23   9   4   31029    8346   1
 -22   9   4   11171    4739   1
 -21   9   4   23414    5449   1
 -20   9   4    8530    6561   1
 -19   9   4    2259    4219   1
 -18   9   4   12539    6509   1
 -13  -9  -4   61248    5318  -2
 -17   9   4   61248    5318   1
 -12  -9  -4   48600    6706  -2
 -16   9   4   48600    6706   1
 -11  -9  -4   61955    6794  -2
 -15   9   4   61955    6794   1
 -10  -9  -4   33899    3580  -2
 -14   9   4   33899    3580   1
  -9  -9  -4   44689    4253  -2
 -13   9   4   44689    4253   1
  -8  -9  -4   30867    4940  -2
 -12   9   4   30867    4940   1
  -7  -9  -4   12374    3690  -2
 -11   9   4   12374    3690   1
  -6  -9  -4  114931    4743  -2
 -10   9   4  114931    4743   1
  -5  -9  -4   43467    3180  -2
  -9   9   4   43467    3180   1
  -4  -9  -4   23046    2408  -2
  -8   9   4   23046    2408   1
  -3  -9  -4   63235    4130  -2
  -7   9   4   63235    4130   1
  -2  -9  -4  318162    6472  -2
  -6   9   4  318162    6472   1
  -1  -9  -4  218796    5320  -2
  -5   9   4  218796    5320   1
   0  -9  -4  867488   11602  -2
  -4   9   4  867488   11602   1
   1  -9  -4   30649    2493  -2
  -3   9   4   30649    2493   1
   2  -9  -4  822744   11003  -2
  -2   9   4  822744   11003   1
   3  -9  -4   23829    2165  -2
  -1   9   4   23829    2165   1
   4  -9  -4  974298   12222  -2
   0   9   4  974298   12222   1
   5  -9  -4   27388    2218  -2
   1   9   4   27388    2218   1
   6  -9  -4  561884    9701  -2
   2   9   4  561884    9701   1
   7  -9  -4   62998    3071  -2
   3   9   4   62998    3071   1
   8  -9  -4  216895    5812  -2
   4   9   4  216895    5812   1
   9  -9  -4   15647    1947  -2
   5   9   4   15647    1947   1
  10  -9  -4  319658    6230  -2
   6   9   4  319658    6230   1
  11  -9  -4   15996    1947  -2
   7   9   4   15996    1947   1
  12  -9  -4  263242    6488  -2
   8   9   4  263242    6488   1
  13  -9  -4   36809    2678  -2
   9   9   4   36809    2678   1
  14  -9  -4  377753    7206  -2
  10   9   4  377753    7206   1
  15  -9  -4   42738    7419  -2
  11   9   4   42738    7419   1
  16  -9  -4  425729   18146  -2
  12   9   4  425729   18146   1
  17  -9  -4   30760    7043  -2
  13   9   4   30760    7043   1
  14   9   4  104668   11099   1
  15   9   4    3764    8550   1
  16   9   4  164594   14114   1
  17   9   4    4172    6222   1
  18   9   4  189207   15550   1
  19   9   4    1638    6323   1
 -22  10   4    7946    6349   1
 -21  10   4    5402    5308   1
 -20  10   4     -17    4181   1
 -19  10   4    5293    4227   1
 -18  10   4   53789    6556   1
 -13 -10  -4   44702    5769  -2
 -17  10   4   44702    5769   1
 -12 -10  -4  160324    9679  -2
 -16  10   4  160324    9679   1
 -11 -10  -4   63026    5149  -2
 -15  10   4   63026    5149   1
 -10 -10  -4  343785   11672  -2
 -14  10   4  343785   11672   1
  -9 -10  -4   10956    2822  -2
 -13  10   4   10956    2822   1
  -8 -10  -4  132049    6361  -2
 -12  10   4  132049    6361   1
  -7 -10  -4    1669    2457  -2
 -11  10   4    1669    2457   1
  -6 -10  -4  157249    6842  -2
 -10  10   4  157249    6842   1
  -5 -10  -4   53172    3695  -2
  -9  10   4   53172    3695   1
  -4 -10  -4  144439    8831  -2
  -8  10   4  144439    8831   1
  -3 -10  -4   53159    4179  -2
  -7  10   4   53159    4179   1
  -2 -10  -4  196320    5733  -2
  -6  10   4  196320    5733   1
  -1 -10  -4    4538    2085  -2
  -5  10   4    4538    2085   1
   0 -10  -4  199761    5316  -2
  -4  10   4  199761    5316   1
   1 -10  -4     169    1611  -2
  -3  10   4     169    1611   1
   2 -10  -4   96706    4435  -2
  -2  10   4   96706    4435   1
   3 -10  -4    8270    2129  -2
  -1  10   4    8270    2129   1
   4 -10  -4  153800    4852  -2
   0  10   4  153800    4852   1
   5 -10  -4   63404    3411  -2
   1  10   4   63404    3411   1
   6 -10  -4  195669    5728  -2
   2  10   4  195669    5728   1
   7 -10  -4    4459    1649  -2
   3  10   4    4459    1649   1
   8 -10  -4   99789    3936  -2
   4  10   4   99789    3936   1
   9 -10  -4    6557    1924  -2
   5  10   4    6557    1924   1
  10 -10  -4   42880    4303  -2
   6  10   4   42880    4303   1
  11 -10  -4   14423    2126  -2
   7  10   4   14423    2126   1
  12 -10  -4  144041    4960  -2
   8  10   4  144041    4960   1
  13 -10  -4   45832    4368  -2
   9  10   4   45832    4368   1
  14 -10  -4  139394    4680  -2
  10  10   4  139394    4680   1
  15 -10  -4   32576    2929  -2
  11  10   4   32576    2929   1
  16 -10  -4   26588    7214  -2
  12  10   4   26588    7214   1
  17 -10  -4   10185    5835  -2
  13  10   4   10185    5835   1
  14  10   4   36060    7913   1
  15  10   4   -6161    8534   1
  16  10   4    6098    6297   1
  17  10   4    4808    8828   1
  18  10   4    7162    6646   1
 -22  11   4   -4245    4245   1
 -21  11   4   -4035    4035   1
 -20  11   4   11930    4869   1
 -19  11   4     146    4204   1
 -18  11   4    6050    4145   1
 -13 -11  -4    2643    4175  -2
 -17  11   4    2643    4175   1
 -12 -11  -4    5991    6151  -2
 -16  11   4    5991    6151   1
 -11 -11  -4    1199    4001  -2
 -15  11   4    1199    4001   1
 -10 -11  -4   13109    4493  -2
 -14  11   4   13109    4493   1
  -9 -11  -4    2251    2701  -2
 -13  11   4    2251    2701   1
  -8 -11  -4   11560    3084  -2
 -12  11   4   11560    3084   1
  -7 -11  -4  119574    8078  -2
 -11  11   4  119574    8078   1
  -6 -11  -4     132    2482  -2
 -10  11   4     132    2482   1
  -5 -11  -4   38267    3788  -2
  -9  11   4   38267    3788   1
  -4 -11  -4    1932    2465  -2
  -8  11   4    1932    2465   1
  -3 -11  -4    6512    2057  -2
  -7  11   4    6512    2057   1
  -2 -11  -4     901    1999  -2
  -6  11   4     901    1999   1
  -1 -11  -4  169575    5420  -2
  -5  11   4  169575    5420   1
   0 -11  -4   76169    5377  -2
  -4  11   4   76169    5377   1
   1 -11  -4   65418    4413  -2
  -3  11   4   65418    4413   1
   2 -11  -4  107765    4563  -2
  -2  11   4  107765    4563   1
   3 -11  -4   31506    2753  -2
  -1  11   4   31506    2753   1
   4 -11  -4   77869    5257  -2
   0  11   4   77869    5257   1
   5 -11  -4   13956    2248  -2
   1  11   4   13956    2248   1
   6 -11  -4     420    2084  -2
   2  11   4     420    2084   1
   7 -11  -4   49986    3182  -2
   3  11   4   49986    3182   1
   8 -11  -4     452    1785  -2
   4  11   4     452    1785   1
   9 -11  -4   77533    4182  -2
   5  11   4   77533    4182   1
  10 -11  -4    5323    2081  -2
   6  11   4    5323    2081   1
  11 -11  -4  157291    5225  -2
   7  11   4  157291    5225   1
  12 -11  -4   19973    3266  -2
   8  11   4   19973    3266   1
  13 -11  -4   21875    2974  -2
   9  11   4   21875    2974   1
  14 -11  -4    3685    2359  -2
  10  11   4    3685    2359   1
  15 -11  -4    3100    2194  -2
  11  11   4    3100    2194   1
  16 -11  -4   11420    2396  -2
  12  11   4   11420    2396   1
  17 -11  -4    2742    3465  -2
  13  11   4    2742    3465   1
  14  11   4   77074   10562   1
  15  11   4   -3746    5739   1
  16  11   4   40293    8850   1
  17  11   4    8727    6549   1
  18  11   4    4189    6197   1
 -21  12   4    7537    4811   1
 -20  12   4  167487   10788   1
 -19  12   4   -1207    4070   1
 -18  12   4  179041   11029   1
 -13 -12  -4   38063    5925  -2
 -17  12   4   38063    5925   1
 -12 -12  -4  104299   15985  -2
 -16  12   4  104299   15985   1
 -11 -12  -4   29699    5570  -2
 -15  12   4   29699    5570   1
 -10 -12  -4   57424    6611  -2
 -14  12   4   57424    6611   1
  -9 -12  -4    2285    3672  -2
 -13  12   4    2285    3672   1
  -8 -12  -4  265945   16611  -2
 -12  12   4  265945   16611   1
  -7 -12  -4    9094    4210  -2
 -11  12   4    9094    4210   1
  -6 -12  -4  205133    9238  -2
 -10  12   4  205133    9238   1
  -5 -12  -4   25600    3531  -2
  -9  12   4   25600    3531   1
  -4 -12  -4  322738    9390  -2
  -8  12   4  322738    9390   1
  -3 -12  -4    7992    2681  -2
  -7  12   4    7992    2681   1
  -2 -12  -4  263834    7688  -2
  -6  12   4  263834    7688   1
  -1 -12  -4   48739    3455  -2
  -5  12   4   48739    3455   1
   0 -12  -4  479157   11488  -2
  -4  12   4  479157   11488   1
   1 -12  -4   29424    2927  -2
  -3  12   4   29424    2927   1
   2 -12  -4  618279   10090  -2
  -2  12   4  618279   10090   1
   3 -12  -4  149769    6182  -2
  -1  12   4  149769    6182   1
   4 -12  -4  421221   13453  -2
   0  12   4  421221   13453   1
   5 -12  -4   85132    4772  -2
   1  12   4   85132    4772   1
   6 -12  -4  215685    7843  -2
   2  12   4  215685    7843   1
   7 -12  -4   -1957    1957  -2
   3  12   4   -1957    1957   1
   8 -12  -4  122033    5132  -2
   4  12   4  122033    5132   1
   9 -12  -4   60571    4074  -2
   5  12   4   60571    4074   1
  10 -12  -4  127876    5593  -2
   6  12   4  127876    5593   1
  11 -12  -4   24656    3556  -2
   7  12   4   24656    3556   1
  12 -12  -4  178935    5890  -2
   8  12   4  178935    5890   1
  13 -12  -4      -3    2180  -2
   9  12   4      -3    2180   1
  14 -12  -4   31586    4021  -2
  10  12   4   31586    4021   1
  15 -12  -4    3930    2717  -2
  11  12   4    3930    2717   1
  16 -12  -4   25675    5116  -2
  12  12   4   25675    5116   1
  17 -12  -4    3783    4060  -2
  13  12   4    3783    4060   1
  14  12   4    5184    5874   1
  15  12   4    7458    6678   1
  16  12   4    5563    6195   1
  17  12   4   13364    7507   1
 -20  13   4    8432    6396   1
 -19  13   4   35719    6482   1
 -18  13   4   31634   10965   1
 -13 -13  -4   -1765    4082  -2
 -17  13   4   -1765    4082   1
 -12 -13  -4   11690    4657  -2
 -16  13   4   11690    4657   1
 -11 -13  -4   14950    8864  -2
 -15  13   4   14950    8864   1
 -10 -13  -4    5673    5649  -2
 -14  13   4    5673    5649   1
  -9 -13  -4   -3635    3653  -2
 -13  13   4   -3635    3653   1
  -8 -13  -4  120770   13673  -2
 -12  13   4  120770   13673   1
  -7 -13  -4    8175    4171  -2
 -11  13   4    8175    4171   1
  -6 -13  -4  202307   20563  -2
 -10  13   4  202307   20563   1
  -5 -13  -4  106646    7959  -2
  -9  13   4  106646    7959   1
  -4 -13  -4  184082   15878  -2
  -8  13   4  184082   15878   1
  -3 -13  -4   24107    4870  -2
  -7  13   4   24107    4870   1
  -2 -13  -4  199122    9415  -2
  -6  13   4  199122    9415   1
  -1 -13  -4    3810    3344  -2
  -5  13   4    3810    3344   1
   0 -13  -4  129747    8081  -2
  -4  13   4  129747    8081   1
   1 -13  -4   20811    3316  -2
  -3  13   4   20811    3316   1
   2 -13  -4  202922    6752  -2
  -2  13   4  202922    6752   1
   3 -13  -4    3790    2515  -2
  -1  13   4    3790    2515   1
   4 -13  -4  171335    7033  -2
   0  13   4  171335    7033   1
   5 -13  -4   18923    2986  -2
   1  13   4   18923    2986   1
   6 -13  -4  307015    9786  -2
   2  13   4  307015    9786   1
   7 -13  -4    1573    3627  -2
   3  13   4    1573    3627   1
   8 -13  -4  400433   12075  -2
   4  13   4  400433   12075   1
   9 -13  -4   43916    3731  -2
   5  13   4   43916    3731   1
  10 -13  -4  536699   10525  -2
   6  13   4  536699   10525   1
  11 -13  -4   24547    3238  -2
   7  13   4   24547    3238   1
  12 -13  -4  330101    9166  -2
   8  13   4  330101    9166   1
  13 -13  -4    -903    2846  -2
   9  13   4    -903    2846   1
  14 -13  -4  102840    5331  -2
  10  13   4  102840    5331   1
  15 -13  -4   15863    2816  -2
  11  13   4   15863    2816   1
  16 -13  -4  110259    5221  -2
  12  13   4  110259    5221   1
  17 -13  -4    1144    3169  -2
  13  13   4    1144    3169   1
  14  13   4  186227    7984   1
  15  13   4   19611    9046   1
  16  13   4  147242   15110   1
 -19  14   4   14833    6815   1
 -18  14   4  118346    9491   1
 -13 -14  -4     512    4780  -2
 -17  14   4     512    4780   1
 -12 -14  -4  124069   11643  -2
 -16  14   4  124069   11643   1
 -11 -14  -4    8159    5585  -2
 -15  14   4    8159    5585   1
 -10 -14  -4   75128    8105  -2
 -14  14   4   75128    8105   1
  -9 -14  -4    3032    4997  -2
 -13  14   4    3032    4997   1
  -8 -14  -4  104117    8027  -2
 -12  14   4  104117    8027   1
  -7 -14  -4   19436    6589  -2
 -11  14   4   19436    6589   1
  -6 -14  -4  204977   14638  -2
 -10  14   4  204977   14638   1
  -5 -14  -4   47241    6721  -2
  -9  14   4   47241    6721   1
  -4 -14  -4  430589   16330  -2
  -8  14   4  430589   16330   1
  -3 -14  -4   20622    4579  -2
  -7  14   4   20622    4579   1
  -2 -14  -4  308493   11238  -2
  -6  14   4  308493   11238   1
  -1 -14  -4   24709    4938  -2
  -5  14   4   24709    4938   1
   0 -14  -4  112067    7970  -2
  -4  14   4  112067    7970   1
   1 -14  -4   64095    6236  -2
  -3  14   4   64095    6236   1
   2 -14  -4  140762    9757  -2
  -2  14   4  140762    9757   1
   3 -14  -4   12388    4246  -2
  -1  14   4   12388    4246   1
   4 -14  -4  103743    5908  -2
   0  14   4  103743    5908   1
   5 -14  -4    3139    2371  -2
   1  14   4    3139    2371   1
   6 -14  -4  158725    8171  -2
   2  14   4  158725    8171   1
   7 -14  -4    3835    2960  -2
   3  14   4    3835    2960   1
   8 -14  -4  166484    6687  -2
   4  14   4  166484    6687   1
   9 -14  -4    4654    2668  -2
   5  14   4    4654    2668   1
  10 -14  -4  105820    5998  -2
   6  14   4  105820    5998   1
  11 -14  -4    7127    4027  -2
   7  14   4    7127    4027   1
  12 -14  -4  100229    5586  -2
   8  14   4  100229    5586   1
  13 -14  -4   78658    5029  -2
   9  14   4   78658    5029   1
  14 -14  -4   58103    5183  -2
  10  14   4   58103    5183   1
  15 -14  -4    7268    3012  -2
  11  14   4    7268    3012   1
  16 -14  -4   28990    5628  -2
  12  14   4   28990    5628   1
  17 -14  -4   -2830    2830  -2
  13  14   4   -2830    2830   1
  14  14   4   11604    3828   1
  15  14   4   28528    4861   1
 -18  15   4    -298    4369   1
 -13 -15  -4   -4478    4478  -2
 -17  15   4   -4478    4478   1
 -12 -15  -4     158    5920  -2
 -16  15   4     158    5920   1
 -11 -15  -4   -3814    4717  -2
 -15  15   4   -3814    4717   1
 -10 -15  -4   19299    6466  -2
 -14  15   4   19299    6466   1
  -9 -15  -4    7476    4583  -2
 -13  15   4    7476    4583   1
  -8 -15  -4     285    4093  -2
 -12  15   4     285    4093   1
  -7 -15  -4   10872    4457  -2
 -11  15   4   10872    4457   1
  -6 -15  -4   17114    5130  -2
 -10  15   4   17114    5130   1
  -5 -15  -4    2107    4143  -2
  -9  15   4    2107    4143   1
  -4 -15  -4    4567    4355  -2
  -8  15   4    4567    4355   1
  -3 -15  -4    2945    3999  -2
  -7  15   4    2945    3999   1
  -2 -15  -4   19169    4924  -2
  -6  15   4   19169    4924   1
  -1 -15  -4   17762    5816  -2
  -5  15   4   17762    5816   1
   0 -15  -4   23684    5110  -2
  -4  15   4   23684    5110   1
   1 -15  -4   32179    5457  -2
  -3  15   4   32179    5457   1
   2 -15  -4    3022    4310  -2
  -2  15   4    3022    4310   1
   3 -15  -4    6291    3985  -2
  -1  15   4    6291    3985   1
   4 -15  -4    1478    3622  -2
   0  15   4    1478    3622   1
   5 -15  -4  149208    9410  -2
   1  15   4  149208    9410   1
   6 -15  -4   20008    4786  -2
   2  15   4   20008    4786   1
   7 -15  -4  128555   14684  -2
   3  15   4  128555   14684   1
   8 -15  -4    4240    3043  -2
   4  15   4    4240    3043   1
   9 -15  -4    5658    2994  -2
   5  15   4    5658    2994   1
  10 -15  -4    1564    2565  -2
   6  15   4    1564    2565   1
  11 -15  -4    3940    2578  -2
   7  15   4    3940    2578   1
  12 -15  -4   -2252    2347  -2
   8  15   4   -2252    2347   1
  13 -15  -4   20752    3449  -2
   9  15   4   20752    3449   1
  14 -15  -4    5635    3701  -2
  10  15   4    5635    3701   1
  15 -15  -4   30950    5967  -2
  11  15   4   30950    5967   1
  16 -15  -4   13182    3855  -2
  12  15   4   13182    3855   1
  17 -15  -4   12492    4693  -2
  13  15   4   12492    4693   1
  14  15   4    3495    3825   1
 -13 -16  -4    4658    5081  -2
 -17  16   4    4658    5081   1
 -12 -16  -4   39114    6673  -2
 -16  16   4   39114    6673   1
 -11 -16  -4   13317    5303  -2
 -15  16   4   13317    5303   1
 -10 -16  -4   81394    9491  -2
 -14  16   4   81394    9491   1
  -9 -16  -4    7632    4858  -2
 -13  16   4    7632    4858   1
  -8 -16  -4  158010   12768  -2
 -12  16   4  158010   12768   1
  -7 -16  -4   29544    6979  -2
 -11  16   4   29544    6979   1
  -6 -16  -4   66876    7064  -2
 -10  16   4   66876    7064   1
  -5 -16  -4   55790    7943  -2
  -9  16   4   55790    7943   1
  -4 -16  -4   51250    6678  -2
  -8  16   4   51250    6678   1
  -3 -16  -4    7645    4749  -2
  -7  16   4    7645    4749   1
  -2 -16  -4  154200   10399  -2
  -6  16   4  154200   10399   1
  -1 -16  -4    5821    5624  -2
  -5  16   4    5821    5624   1
   0 -16  -4  283342   11626  -2
  -4  16   4  283342   11626   1
   1 -16  -4   17450    4706  -2
  -3  16   4   17450    4706   1
   2 -16  -4  388669   13117  -2
  -2  16   4  388669   13117   1
   3 -16  -4   67896   10875  -2
  -1  16   4   67896   10875   1
   4 -16  -4  245869   11114  -2
   0  16   4  245869   11114   1
   5 -16  -4   52242    6178  -2
   1  16   4   52242    6178   1
   6 -16  -4   82133    7096  -2
   2  16   4   82133    7096   1
   7 -16  -4    1952    3608  -2
   3  16   4    1952    3608   1
   8 -16  -4   22055    7083  -2
   4  16   4   22055    7083   1
   9 -16  -4   -1044    5354  -2
   5  16   4   -1044    5354   1
  10 -16  -4   29178    7257  -2
   6  16   4   29178    7257   1
  11 -16  -4    3426    8746  -2
   7  16   4    3426    8746   1
  12 -16  -4   25560    4929  -2
   8  16   4   25560    4929   1
  13 -16  -4   -2910    2910  -2
   9  16   4   -2910    2910   1
  14 -16  -4   32843    4921  -2
  10  16   4   32843    4921   1
  15 -16  -4    8564    4211  -2
  11  16   4    8564    4211   1
  16 -16  -4   25506    6674  -2
  12  16   4   25506    6674   1
  17 -16  -4   25971   15956  -2
  13  16   4   25971   15956   1
 -12 -17  -4   10627    5256  -2
 -16  17   4   10627    5256   1
 -11 -17  -4   18808    5583  -2
 -15  17   4   18808    5583   1
 -10 -17  -4   -1726    4640  -2
 -14  17   4   -1726    4640   1
  -9 -17  -4    9066    5313  -2
 -13  17   4    9066    5313   1
  -8 -17  -4   19983    5285  -2
 -12  17   4   19983    5285   1
  -7 -17  -4    4803    4510  -2
 -11  17   4    4803    4510   1
  -6 -17  -4  105533    9180  -2
 -10  17   4  105533    9180   1
  -5 -17  -4    8489    4675  -2
  -9  17   4    8489    4675   1
  -4 -17  -4   21899    7404  -2
  -8  17   4   21899    7404   1
  -3 -17  -4   -1442    3796  -2
  -7  17   4   -1442    3796   1
  -2 -17  -4   16917    4954  -2
  -6  17   4   16917    4954   1
  -1 -17  -4   17216    4816  -2
  -5  17   4   17216    4816   1
   0 -17  -4   63094   10281  -2
  -4  17   4   63094   10281   1
   1 -17  -4   12973    4655  -2
  -3  17   4   12973    4655   1
   2 -17  -4  179172   10914  -2
  -2  17   4  179172   10914   1
   3 -17  -4   25324    5040  -2
  -1  17   4   25324    5040   1
   4 -17  -4  216432   12161  -2
   0  17   4  216432   12161   1
   5 -17  -4    2454    3844  -2
   1  17   4    2454    3844   1
   6 -17  -4  105430    8466  -2
   2  17   4  105430    8466   1
   7 -17  -4   12721    4360  -2
   3  17   4   12721    4360   1
   8 -17  -4  139542    9891  -2
   4  17   4  139542    9891   1
   9 -17  -4    4274    6067  -2
   5  17   4    4274    6067   1
  10 -17  -4  235579   17500  -2
   6  17   4  235579   17500   1
  12 -17  -4  223800   27768  -2
   8  17   4  223800   27768   1
  13 -17  -4    6010    7279  -2
   9  17   4    6010    7279   1
  14 -17  -4   93206   13537  -2
  10  17   4   93206   13537   1
  15 -17  -4   12826    8584  -2
  11  17   4   12826    8584   1
  16 -17  -4  133664   18176  -2
  12  17   4  133664   18176   1
 -10 -18  -4   75538    8182  -2
 -14  18   4   75538    8182   1
  -9 -18  -4   14662    5505  -2
 -13  18   4   14662    5505   1
  -8 -18  -4  159875   17172  -2
 -12  18   4  159875   17172   1
  -7 -18  -4   10659    5061  -2
 -11  18   4   10659    5061   1
  -6 -18  -4  241804   19385  -2
 -10  18   4  241804   19385   1
  -5 -18  -4   13298    5648  -2
  -9  18   4   13298    5648   1
  -4 -18  -4  168537   11032  -2
  -8  18   4  168537   11032   1
  -3 -18  -4    4580    4304  -2
  -7  18   4    4580    4304   1
  -2 -18  -4  144226   10339  -2
  -6  18   4  144226   10339   1
  -1 -18  -4   16125    4776  -2
  -5  18   4   16125    4776   1
   0 -18  -4  216005   12655  -2
  -4  18   4  216005   12655   1
   1 -18  -4    8735    5741  -2
  -3  18   4    8735    5741   1
   2 -18  -4  241092   14732  -2
  -2  18   4  241092   14732   1
   3 -18  -4   14282    4796  -2
  -1  18   4   14282    4796   1
   4 -18  -4  226329   12547  -2
   0  18   4  226329   12547   1
   5 -18  -4   28061    5220  -2
   1  18   4   28061    5220   1
   6 -18  -4   95910    8543  -2
   2  18   4   95910    8543   1
   7 -18  -4   51422    6885  -2
   3  18   4   51422    6885   1
   8 -18  -4   32920    7554  -2
   4  18   4   32920    7554   1
   9 -18  -4    6772    4909  -2
   5  18   4    6772    4909   1
  10 -18  -4   95026    8598  -2
   6  18   4   95026    8598   1
  11 -18  -4     751   10998  -2
   7  18   4     751   10998   1
  12 -18  -4   59816   10875  -2
   8  18   4   59816   10875   1
  13 -18  -4    5888    7719  -2
   9  18   4    5888    7719   1
  14 -18  -4   96901   14284  -2
  10  18   4   96901   14284   1
  -8 -19  -4     158    4414  -2
 -12  19   4     158    4414   1
  -7 -19  -4     484    4554  -2
 -11  19   4     484    4554   1
  -6 -19  -4    5890    4660  -2
 -10  19   4    5890    4660   1
  -5 -19  -4    7280    4857  -2
  -9  19   4    7280    4857   1
  -4 -19  -4   -4483    4483  -2
  -8  19   4   -4483    4483   1
  -3 -19  -4    7653    5639  -2
  -7  19   4    7653    5639   1
  -2 -19  -4   -4280    4399  -2
  -6  19   4   -4280    4399   1
  -1 -19  -4    5107    4532  -2
  -5  19   4    5107    4532   1
   0 -19  -4    1641    4425  -2
  -4  19   4    1641    4425   1
   1 -19  -4    2055    4296  -2
  -3  19   4    2055    4296   1
   2 -19  -4   10952    5091  -2
  -2  19   4   10952    5091   1
   3 -19  -4    6095    4465  -2
  -1  19   4    6095    4465   1
   4 -19  -4   11440    5887  -2
   0  19   4   11440    5887   1
   5 -19  -4   14712    7280  -2
   1  19   4   14712    7280   1
   6 -19  -4   13441    5114  -2
   2  19   4   13441    5114   1
   7 -19  -4    8563    4585  -2
   3  19   4    8563    4585   1
   8 -19  -4    3561    4549  -2
   4  19   4    3561    4549   1
   9 -19  -4   -1195    4385  -2
   5  19   4   -1195    4385   1
  10 -19  -4    2778    4680  -2
   6  19   4    2778    4680   1
  11 -19  -4     667    5026  -2
   7  19   4     667    5026   1
  12 -19  -4   -2127    4800  -2
   8  19   4   -2127    4800   1
  -6 -20  -4   41426    6933  -2
 -10  20   4   41426    6933   1
  -5 -20  -4   22034    6209  -2
  -9  20   4   22034    6209   1
  -4 -20  -4   26341   10314  -2
  -8  20   4   26341   10314   1
  -3 -20  -4   87839    9118  -2
  -7  20   4   87839    9118   1
  -2 -20  -4   59550    9594  -2
  -6  20   4   59550    9594   1
  -1 -20  -4   37841    7053  -2
  -5  20   4   37841    7053   1
   0 -20  -4   46306    8160  -2
  -4  20   4   46306    8160   1
   1 -20  -4   -3123    4580  -2
  -3  20   4   -3123    4580   1
   2 -20  -4   14861    5465  -2
  -2  20   4   14861    5465   1
   3 -20  -4    2141    4355  -2
  -1  20   4    2141    4355   1
   4 -20  -4    5763    4490  -2
   0  20   4    5763    4490   1
   5 -20  -4   11636    8468  -2
   1  20   4   11636    8468   1
   6 -20  -4   13842    4990  -2
   2  20   4   13842    4990   1
   7 -20  -4   15342    4892  -2
   3  20   4   15342    4892   1
   8 -20  -4   60463    7745  -2
   4  20   4   60463    7745   1
   9 -20  -4    4138    4371  -2
   5  20   4    4138    4371   1
  10 -20  -4   15356    5533  -2
   6  20   4   15356    5533   1
  -3 -21  -4    4873    7349  -2
  -7  21   4    4873    7349   1
  -2 -21  -4   26999    6868  -2
  -6  21   4   26999    6868   1
  -1 -21  -4    6058    9910  -2
  -5  21   4    6058    9910   1
   0 -21  -4   86171   11600  -2
  -4  21   4   86171   11600   1
   1 -21  -4    3606    4514  -2
  -3  21   4    3606    4514   1
   2 -21  -4  142034   11394  -2
  -2  21   4  142034   11394   1
   3 -21  -4    1415    4719  -2
  -1  21   4    1415    4719   1
   4 -21  -4  115149   10504  -2
   0  21   4  115149   10504   1
   5 -21  -4   -3778    5716  -2
   1  21   4   -3778    5716   1
   6 -21  -4   44752    7571  -2
   2  21   4   44752    7571   1
   7 -21  -4    3084    6659  -2
   3  21   4    3084    6659   1
 -25   1   5    8771    6756   1
 -24   1   5   11422    5358   1
 -23   1   5    5400    4955   1
 -22   1   5   47787    6530   1
 -21   1   5   12597    6617   1
 -20   1   5   93949    8663   1
 -19   1   5   36833    5317   1
 -13  -1  -5  181165    7967  -2
 -18   1   5  181165    7967   1
 -12  -1  -5  107291    5897  -2
 -17   1   5  107291    5897   1
 -11  -1  -5  210071    6430  -2
 -16   1   5  210071    6430   1
 -10  -1  -5   76910    4554  -2
 -15   1   5   76910    4554   1
  -9  -1  -5  286914    6702  -2
 -14   1   5  286914    6702   1
  -8  -1  -5   63740    3462  -2
 -13   1   5   63740    3462   1
  -7  -1  -5  248710    6058  -2
 -12   1   5  248710    6058   1
  -6  -1  -5   69948    4312  -2
 -11   1   5   69948    4312   1
  -5  -1  -5  341990    7352  -2
 -10   1   5  341990    7352   1
  -4  -1  -5   75199    5231  -2
  -9   1   5   75199    5231   1
  -3  -1  -5  327671    6054  -2
  -8   1   5  327671    6054   1
  -2  -1  -5   22635    2079  -2
  -7   1   5   22635    2079   1
  -1  -1  -5  346454    5825  -2
  -6   1   5  346454    5825   1
   0  -1  -5  207077    4289  -2
  -5   1   5  207077    4289   1
   1  -1  -5 1898194   21922  -2
  -4   1   5 1898194   21922   1
   3  -1  -5 2738374   36277  -2
  -2   1   5 2738374   36277   1
   5  -1  -5 1073503   10864  -2
   0   1   5 1073503   10864   1
   6  -1  -5   71233    1896  -2
   1   1   5   71233    1896   1
   7  -1  -5  127789    2517  -2
   2   1   5  127789    2517   1
   8  -1  -5   73190    7475  -2
   3   1   5   73190    7475   1
   9  -1  -5  388608    7153  -2
   4   1   5  388608    7153   1
  10  -1  -5   80559    3108  -2
   5   1   5   80559    3108   1
  11  -1  -5  209578    5980  -2
   6   1   5  209578    5980   1
  12  -1  -5   84300    3397  -2
   7   1   5   84300    3397   1
  13  -1  -5  398677    7625  -2
   8   1   5  398677    7625   1
  14  -1  -5   25486    3138  -2
   9   1   5   25486    3138   1
  15  -1  -5  383713    8561  -2
  10   1   5  383713    8561   1
  16  -1  -5   14008    2892  -2
  11   1   5   14008    2892   1
  17  -1  -5  265429    6872  -2
  12   1   5  265429    6872   1
  18  -1  -5   12301    2492  -2
  13   1   5   12301    2492   1
  14   1   5  209431    6534   1
  15   1   5    8129    2728   1
  16   1   5  103755    5279   1
  17   1   5    1061    2612   1
  18   1   5   15708    3136   1
  19   1   5    1202    2226   1
  20   1   5    1752    1858   1
 -25   2   5   14182    5349   1
 -24   2   5   26945    6087   1
 -23   2   5   68661    9823   1
 -22   2   5   96568    8355   1
 -21   2   5   79878    7628   1
 -20   2   5  260032   14228   1
 -19   2   5   54581    6315   1
 -13  -2  -5  178637    8040  -2
 -18   2   5  178637    8040   1
 -12  -2  -5   32299    3477  -2
 -17   2   5   32299    3477   1
 -11  -2  -5   94482    5104  -2
 -16   2   5   94482    5104   1
 -10  -2  -5   34141    3800  -2
 -15   2   5   34141    3800   1
  -9  -2  -5  261570    9050  -2
 -14   2   5  261570    9050   1
  -8  -2  -5   20265    2437  -2
 -13   2   5   20265    2437   1
  -7  -2  -5  282646    6432  -2
 -12   2   5  282646    6432   1
  -6  -2  -5   15292    2280  -2
 -11   2   5   15292    2280   1
  -5  -2  -5  191523    5106  -2
 -10   2   5  191523    5106   1
  -4  -2  -5   87405    3715  -2
  -9   2   5   87405    3715   1
  -3  -2  -5   77549    3453  -2
  -8   2   5   77549    3453   1
  -2  -2  -5   21799    2052  -2
  -7   2   5   21799    2052   1
  -1  -2  -5   24240    2076  -2
  -6   2   5   24240    2076   1
   0  -2  -5   78733    3109  -2
  -5   2   5   78733    3109   1
   1  -2  -5  103173    3406  -2
  -4   2   5  103173    3406   1
   2  -2  -5  103025    3256  -2
  -3   2   5  103025    3256   1
   3  -2  -5  440660    6841  -2
  -2   2   5  440660    6841   1
   4  -2  -5   41138    2350  -2
  -1   2   5   41138    2350   1
   5  -2  -5  162764    3012  -2
   0   2   5  162764    3012   1
   6  -2  -5   35463    1555  -2
   1   2   5   35463    1555   1
   7  -2  -5  143070    4149  -2
   2   2   5  143070    4149   1
   8  -2  -5   34272    5078  -2
   3   2   5   34272    5078   1
   9  -2  -5  147911    4326  -2
   4   2   5  147911    4326   1
  10  -2  -5   23799    2703  -2
   5   2   5   23799    2703   1
  11  -2  -5   84686    5210  -2
   6   2   5   84686    5210   1
  12  -2  -5   45010    3587  -2
   7   2   5   45010    3587   1
  13  -2  -5  174947    6250  -2
   8   2   5  174947    6250   1
  14  -2  -5   23283    2455  -2
   9   2   5   23283    2455   1
  15  -2  -5  134119    5094  -2
  10   2   5  134119    5094   1
  16  -2  -5  140325    5367  -2
  11   2   5  140325    5367   1
  17  -2  -5   88962    4827  -2
  12   2   5   88962    4827   1
  18  -2  -5   64330    4303  -2
  13   2   5   64330    4303   1
  14   2   5   22342    3334   1
  15   2   5   30719    3493   1
  16   2   5   48078    4398   1
  17   2   5    8345    3208   1
  18   2   5  138043    7908   1
  19   2   5    9799    3725   1
  20   2   5    2677    3820   1
 -25   3   5   42687    6876   1
 -24   3   5   99026    9020   1
 -23   3   5    8964    4901   1
 -22   3   5   41110    6260   1
 -21   3   5    -851    4138   1
 -20   3   5   57230    6808   1
 -19   3   5   11446    4072   1
 -13  -3  -5   86952    8321  -2
 -18   3   5   86952    8321   1
 -12  -3  -5  143013    6990  -2
 -17   3   5  143013    6990   1
 -11  -3  -5  184556    6497  -2
 -16   3   5  184556    6497   1
 -10  -3  -5  105779    5005  -2
 -15   3   5  105779    5005   1
  -9  -3  -5  515460    9173  -2
 -14   3   5  515460    9173   1
  -8  -3  -5   57317    3146  -2
 -13   3   5   57317    3146   1
  -7  -3  -5  675846   10326  -2
 -12   3   5  675846   10326   1
  -6  -3  -5  109475    5748  -2
 -11   3   5  109475    5748   1
  -5  -3  -5 1140728   14196  -2
 -10   3   5 1140728   14196   1
  -3  -3  -5 1222683   14341  -2
  -8   3   5 1222683   14341   1
  -2  -3  -5  478847    7404  -2
  -7   3   5  478847    7404   1
  -1  -3  -5 1123639   12978  -2
  -6   3   5 1123639   12978   1
   0  -3  -5  309586    5382  -2
  -5   3   5  309586    5382   1
   1  -3  -5  790239    9591  -2
  -4   3   5  790239    9591   1
   2  -3  -5  114093    3658  -2
  -3   3   5  114093    3658   1
   3  -3  -5  569147    7231  -2
  -2   3   5  569147    7231   1
   4  -3  -5  219158    4853  -2
  -1   3   5  219158    4853   1
   5  -3  -5  826789    9218  -2
   0   3   5  826789    9218   1
   6  -3  -5  364440    4789  -2
   1   3   5  364440    4789   1
   7  -3  -5 1410283   20425  -2
   2   3   5 1410283   20425   1
   8  -3  -5  279441    6474  -2
   3   3   5  279441    6474   1
   9  -3  -5 1744773   24598  -2
   4   3   5 1744773   24598   1
  10  -3  -5  194659    7580  -2
   5   3   5  194659    7580   1
  11  -3  -5  875181   14234  -2
   6   3   5  875181   14234   1
  13  -3  -5  503108   10028  -2
   8   3   5  503108   10028   1
  14  -3  -5   45533    4407  -2
   9   3   5   45533    4407   1
  15  -3  -5  227646    6789  -2
  10   3   5  227646    6789   1
  16  -3  -5   16300    2717  -2
  11   3   5   16300    2717   1
  17  -3  -5  106525    5600  -2
  12   3   5  106525    5600   1
  18  -3  -5    2632    2708  -2
  13   3   5    2632    2708   1
  14   3   5  160244    6935   1
  15   3   5    6721    3254   1
  16   3   5   90219    5849   1
  17   3   5   17662    3993   1
  18   3   5   43693    4690   1
  19   3   5   10492    4651   1
  20   3   5   18284   12151   1
 -25   4   5    8950    5014   1
 -24   4   5    6429    4948   1
 -23   4   5    2862    4611   1
 -22   4   5    4218    4707   1
 -21   4   5    2756    4274   1
 -20   4   5    5960    4401   1
 -19   4   5    1328    3993   1
 -13  -4  -5   -2718    2718  -2
 -18   4   5   -2718    2718   1
 -12  -4  -5    4714    3074  -2
 -17   4   5    4714    3074   1
 -11  -4  -5   25367    3392  -2
 -16   4   5   25367    3392   1
 -10  -4  -5    3785    2769  -2
 -15   4   5    3785    2769   1
  -9  -4  -5    8333    2396  -2
 -14   4   5    8333    2396   1
  -8  -4  -5   62204    3943  -2
 -13   4   5   62204    3943   1
  -7  -4  -5    6019    2086  -2
 -12   4   5    6019    2086   1
  -6  -4  -5   -1703    1703  -2
 -11   4   5   -1703    1703   1
  -5  -4  -5  109431    4446  -2
 -10   4   5  109431    4446   1
  -4  -4  -5    9593    1986  -2
  -9   4   5    9593    1986   1
  -3  -4  -5  313041    6069  -2
  -8   4   5  313041    6069   1
  -2  -4  -5    2319    1567  -2
  -7   4   5    2319    1567   1
  -1  -4  -5   36593    2390  -2
  -6   4   5   36593    2390   1
   0  -4  -5   41714    2453  -2
  -5   4   5   41714    2453   1
   1  -4  -5  114118    3610  -2
  -4   4   5  114118    3610   1
   2  -4  -5   22766    1859  -2
  -3   4   5   22766    1859   1
   3  -4  -5   33741    3021  -2
  -2   4   5   33741    3021   1
   4  -4  -5   51257    2263  -2
  -1   4   5   51257    2263   1
   5  -4  -5  132341    3051  -2
   0   4   5  132341    3051   1
   6  -4  -5   91839    3393  -2
   1   4   5   91839    3393   1
   7  -4  -5    2105    1073  -2
   2   4   5    2105    1073   1
   8  -4  -5   61228    3545  -2
   3   4   5   61228    3545   1
   9  -4  -5  111390    5562  -2
   4   4   5  111390    5562   1
  10  -4  -5    9230    2171  -2
   5   4   5    9230    2171   1
  11  -4  -5    2548    3184  -2
   6   4   5    2548    3184   1
  12  -4  -5   10494    2500  -2
   7   4   5   10494    2500   1
  13  -4  -5   50376    4182  -2
   8   4   5   50376    4182   1
  14  -4  -5   43260    3857  -2
   9   4   5   43260    3857   1
  15  -4  -5   90392    5259  -2
  10   4   5   90392    5259   1
  16  -4  -5    3773    3260  -2
  11   4   5    3773    3260   1
  17  -4  -5     296    2734  -2
  12   4   5     296    2734   1
  18  -4  -5   -1868    2837  -2
  13   4   5   -1868    2837   1
  14   4   5    1636    2981   1
  15   4   5   27017    4200   1
  16   4   5     605    3363   1
  17   4   5     493    3494   1
  18   4   5    6282    3470   1
  19   4   5    1882    5292   1
  20   4   5    -619    4396   1
 -25   5   5    2091    4595   1
 -24   5   5    7167    4888   1
 -23   5   5    3661    4852   1
 -22   5   5   20365    5647   1
 -21   5   5   29549    5639   1
 -20   5   5   26852    8722   1
 -19   5   5   10974    4571   1
 -13  -5  -5   96866    6181  -2
 -18   5   5   96866    6181   1
 -12  -5  -5   11385    3187  -2
 -17   5   5   11385    3187   1
 -11  -5  -5   53134    4766  -2
 -16   5   5   53134    4766   1
 -10  -5  -5   23629    3026  -2
 -15   5   5   23629    3026   1
  -9  -5  -5   93016    5366  -2
 -14   5   5   93016    5366   1
  -8  -5  -5   24808    2370  -2
 -13   5   5   24808    2370   1
  -7  -5  -5  172976    6233  -2
 -12   5   5  172976    6233   1
  -6  -5  -5   23613    2401  -2
 -11   5   5   23613    2401   1
  -5  -5  -5  242174    5761  -2
 -10   5   5  242174    5761   1
  -4  -5  -5   38972    2586  -2
  -9   5   5   38972    2586   1
  -3  -5  -5  316200    6249  -2
  -8   5   5  316200    6249   1
  -2  -5  -5   75928    3433  -2
  -7   5   5   75928    3433   1
  -1  -5  -5   70373    3245  -2
  -6   5   5   70373    3245   1
   0  -5  -5   58162    3532  -2
  -5   5   5   58162    3532   1
   1  -5  -5  228261    4717  -2
  -4   5   5  228261    4717   1
   2  -5  -5   48876    2440  -2
  -3   5   5   48876    2440   1
   3  -5  -5  277532    4932  -2
  -2   5   5  277532    4932   1
   4  -5  -5   87043    3586  -2
  -1   5   5   87043    3586   1
   5  -5  -5  332303    5196  -2
   0   5   5  332303    5196   1
   6  -5  -5   67965    2705  -2
   1   5   5   67965    2705   1
   7  -5  -5  123304    3529  -2
   2   5   5  123304    3529   1
   8  -5  -5   83318    2597  -2
   3   5   5   83318    2597   1
   9  -5  -5  359262    8432  -2
   4   5   5  359262    8432   1
  10  -5  -5   29294    4406  -2
   5   5   5   29294    4406   1
  11  -5  -5  183626    6084  -2
   6   5   5  183626    6084   1
  12  -5  -5   20962    2740  -2
   7   5   5   20962    2740   1
  13  -5  -5  315933    8445  -2
   8   5   5  315933    8445   1
  14  -5  -5   10829    3964  -2
   9   5   5   10829    3964   1
  15  -5  -5   93840    5587  -2
  10   5   5   93840    5587   1
  16  -5  -5     591    2760  -2
  11   5   5     591    2760   1
  17  -5  -5  109608    6394  -2
  12   5   5  109608    6394   1
  18  -5  -5    3557    3270  -2
  13   5   5    3557    3270   1
  14   5   5  108440    8184   1
  15   5   5   -1242    4480   1
  16   5   5   44514    5015   1
  17   5   5   -3361    3901   1
  18   5   5   16356    4585   1
  19   5   5    5220    5023   1
  20   5   5   11708    7472   1
 -24   6   5   45128    6871   1
 -23   6   5   14308    5113   1
 -22   6   5   56701    7122   1
 -21   6   5    8033    4514   1
 -20   6   5  127983    9103   1
 -19   6   5   10289    4279   1
 -13  -6  -5  230907    9615  -2
 -18   6   5  230907    9615   1
 -12  -6  -5   17263    4147  -2
 -17   6   5   17263    4147   1
 -11  -6  -5   69570    5270  -2
 -16   6   5   69570    5270   1
 -10  -6  -5   44308    4194  -2
 -15   6   5   44308    4194   1
  -9  -6  -5   45678    4339  -2
 -14   6   5   45678    4339   1
  -8  -6  -5  121547    5643  -2
 -13   6   5  121547    5643   1
  -7  -6  -5  199723    5699  -2
 -12   6   5  199723    5699   1
  -6  -6  -5  132226    5541  -2
 -11   6   5  132226    5541   1
  -5  -6  -5  184367    5307  -2
 -10   6   5  184367    5307   1
  -4  -6  -5  121235    4642  -2
  -9   6   5  121235    4642   1
  -3  -6  -5  378082    7019  -2
  -8   6   5  378082    7019   1
  -2  -6  -5   25347    2430  -2
  -7   6   5   25347    2430   1
  -1  -6  -5   49070    2974  -2
  -6   6   5   49070    2974   1
   0  -6  -5   38644    2629  -2
  -5   6   5   38644    2629   1
   1  -6  -5   17501    1978  -2
  -4   6   5   17501    1978   1
   2  -6  -5     143    1396  -2
  -3   6   5     143    1396   1
   3  -6  -5    1003    1658  -2
  -2   6   5    1003    1658   1
   4  -6  -5   59931    3149  -2
  -1   6   5   59931    3149   1
   5  -6  -5    8398    1492  -2
   0   6   5    8398    1492   1
   6  -6  -5   42926    2550  -2
   1   6   5   42926    2550   1
   7  -6  -5    6121    1458  -2
   2   6   5    6121    1458   1
   8  -6  -5  154215    3882  -2
   3   6   5  154215    3882   1
   9  -6  -5   75589    2610  -2
   4   6   5   75589    2610   1
  10  -6  -5   76894    4596  -2
   5   6   5   76894    4596   1
  11  -6  -5  103015    6364  -2
   6   6   5  103015    6364   1
  12  -6  -5   97414    5328  -2
   7   6   5   97414    5328   1
  13  -6  -5   52556    4462  -2
   8   6   5   52556    4462   1
  14  -6  -5    4555    2774  -2
   9   6   5    4555    2774   1
  15  -6  -5   44178    5886  -2
  10   6   5   44178    5886   1
  16  -6  -5    7863    5318  -2
  11   6   5    7863    5318   1
  17  -6  -5  103648    6977  -2
  12   6   5  103648    6977   1
  18  -6  -5    9387    3381  -2
  13   6   5    9387    3381   1
  14   6   5   66801    5844   1
  15   6   5   32850    6652   1
  16   6   5   79534   12349   1
  17   6   5    7846    8744   1
  18   6   5   44553    7905   1
  19   6   5   11061   10245   1
 -24   7   5   70695    8525   1
 -23   7   5    7987    6151   1
 -22   7   5  102571    8490   1
 -21   7   5   12100    5143   1
 -20   7   5   87603    7883   1
 -19   7   5   54033    9198   1
 -13  -7  -5  109002    8359  -2
 -18   7   5  109002    8359   1
 -12  -7  -5   22746    3994  -2
 -17   7   5   22746    3994   1
 -11  -7  -5  188326   10814  -2
 -16   7   5  188326   10814   1
 -10  -7  -5   21552    3350  -2
 -15   7   5   21552    3350   1
  -9  -7  -5  104492    5859  -2
 -14   7   5  104492    5859   1
  -8  -7  -5   16152    2803  -2
 -13   7   5   16152    2803   1
  -7  -7  -5  314611    8045  -2
 -12   7   5  314611    8045   1
  -6  -7  -5  100517    4412  -2
 -11   7   5  100517    4412   1
  -5  -7  -5  960391   14118  -2
 -10   7   5  960391   14118   1
  -4  -7  -5  249027    8484  -2
  -9   7   5  249027    8484   1
  -3  -7  -5 1225172   15087  -2
  -8   7   5 1225172   15087   1
  -2  -7  -5  301748   15164  -2
  -7   7   5  301748   15164   1
  -1  -7  -5 1499180   17181  -2
  -6   7   5 1499180   17181   1
   0  -7  -5  281559    6707  -2
  -5   7   5  281559    6707   1
   1  -7  -5  652209   10773  -2
  -4   7   5  652209   10773   1
   2  -7  -5   44842    2496  -2
  -3   7   5   44842    2496   1
   3  -7  -5  319197    5773  -2
  -2   7   5  319197    5773   1
   4  -7  -5   95966    4155  -2
  -1   7   5   95966    4155   1
   5  -7  -5 1544912   16582  -2
   0   7   5 1544912   16582   1
   6  -7  -5  257556    8917  -2
   1   7   5  257556    8917   1
   7  -7  -5 1632863   38210  -2
   2   7   5 1632863   38210   1
   8  -7  -5  179831   14968  -2
   3   7   5  179831   14968   1
   9  -7  -5 1067406   11990  -2
   4   7   5 1067406   11990   1
  11  -7  -5  629184   12861  -2
   6   7   5  629184   12861   1
  12  -7  -5   88268    5350  -2
   7   7   5   88268    5350   1
  13  -7  -5  204669   11420  -2
   8   7   5  204669   11420   1
  14  -7  -5   10992    3294  -2
   9   7   5   10992    3294   1
  15  -7  -5  130864    7367  -2
  10   7   5  130864    7367   1
  16  -7  -5   19641    3677  -2
  11   7   5   19641    3677   1
  17  -7  -5  216211    8629  -2
  12   7   5  216211    8629   1
  18  -7  -5    3327    3595  -2
  13   7   5    3327    3595   1
  14   7   5  226417   12396   1
  15   7   5   32342    6691   1
  16   7   5  110622   10982   1
  17   7   5   49360    8170   1
  18   7   5   73783    9659   1
  19   7   5   11331    6311   1
 -23   8   5    4134    4699   1
 -22   8   5    -482    4437   1
 -21   8   5   -3697    4009   1
 -20   8   5   61998    8794   1
 -19   8   5   -3571    3571   1
 -13  -8  -5   66846    9504  -2
 -18   8   5   66846    9504   1
 -12  -8  -5   -3574    3574  -2
 -17   8   5   -3574    3574   1
 -11  -8  -5    1437    2834  -2
 -16   8   5    1437    2834   1
 -10  -8  -5   -2103    3046  -2
 -15   8   5   -2103    3046   1
  -9  -8  -5    4075    2710  -2
 -14   8   5    4075    2710   1
  -8  -8  -5    9392    2675  -2
 -13   8   5    9392    2675   1
  -7  -8  -5   30130    3288  -2
 -12   8   5   30130    3288   1
  -6  -8  -5    2008    2054  -2
 -11   8   5    2008    2054   1
  -5  -8  -5     -90    1841  -2
 -10   8   5     -90    1841   1
  -4  -8  -5   38369    3234  -2
  -9   8   5   38369    3234   1
  -3  -8  -5     933    1770  -2
  -8   8   5     933    1770   1
  -2  -8  -5    1166    1880  -2
  -7   8   5    1166    1880   1
  -1  -8  -5   18324    2261  -2
  -6   8   5   18324    2261   1
   0  -8  -5   12184    2033  -2
  -5   8   5   12184    2033   1
   1  -8  -5   91595    3895  -2
  -4   8   5   91595    3895   1
   2  -8  -5    1180    1559  -2
  -3   8   5    1180    1559   1
   3  -8  -5   22976    2297  -2
  -2   8   5   22976    2297   1
   4  -8  -5   12246    1842  -2
  -1   8   5   12246    1842   1
   5  -8  -5   28026    2414  -2
   0   8   5   28026    2414   1
   6  -8  -5    4309    1612  -2
   1   8   5    4309    1612   1
   7  -8  -5   16546    2069  -2
   2   8   5   16546    2069   1
   8  -8  -5     213    1346  -2
   3   8   5     213    1346   1
   9  -8  -5   67683    2931  -2
   4   8   5   67683    2931   1
  10  -8  -5    3781    1458  -2
   5   8   5    3781    1458   1
  11  -8  -5   21025    2609  -2
   6   8   5   21025    2609   1
  12  -8  -5    4147    1341  -2
   7   8   5    4147    1341   1
  13  -8  -5    8613    3179  -2
   8   8   5    8613    3179   1
  14  -8  -5   -1304    2782  -2
   9   8   5   -1304    2782   1
  15  -8  -5    -676    4412  -2
  10   8   5    -676    4412   1
  16  -8  -5   15321    4175  -2
  11   8   5   15321    4175   1
  17  -8  -5    6114    5468  -2
  12   8   5    6114    5468   1
  18  -8  -5    -736    4682  -2
  13   8   5    -736    4682   1
  14   8   5    5877    5506   1
  15   8   5   -1875    4959   1
  16   8   5   12040    6207   1
  17   8   5    1928    5631   1
  18   8   5   26159   16658   1
 -23   9   5    2743    4509   1
 -22   9   5   17411    5263   1
 -21   9   5    6022    4504   1
 -20   9   5   11535    4828   1
 -19   9   5   -1829    3681   1
 -13  -9  -5    1739    4018  -2
 -18   9   5    1739    4018   1
 -12  -9  -5   -2641    3993  -2
 -17   9   5   -2641    3993   1
 -11  -9  -5   -3406    3406  -2
 -16   9   5   -3406    3406   1
 -10  -9  -5    9131    3162  -2
 -15   9   5    9131    3162   1
  -9  -9  -5   50246    5525  -2
 -14   9   5   50246    5525   1
  -8  -9  -5   78216    5137  -2
 -13   9   5   78216    5137   1
  -7  -9  -5  171790    9948  -2
 -12   9   5  171790    9948   1
  -6  -9  -5   30582    3320  -2
 -11   9   5   30582    3320   1
  -5  -9  -5  106339    4897  -2
 -10   9   5  106339    4897   1
  -4  -9  -5   49729    3800  -2
  -9   9   5   49729    3800   1
  -3  -9  -5   47430    3291  -2
  -8   9   5   47430    3291   1
  -2  -9  -5  393084    8051  -2
  -7   9   5  393084    8051   1
  -1  -9  -5  115568    4638  -2
  -6   9   5  115568    4638   1
   0  -9  -5  130549    4736  -2
  -5   9   5  130549    4736   1
   1  -9  -5  154066    4995  -2
  -4   9   5  154066    4995   1
   2  -9  -5   67117    3419  -2
  -3   9   5   67117    3419   1
   3  -9  -5   18943    2160  -2
  -2   9   5   18943    2160   1
   4  -9  -5   76648    3636  -2
  -1   9   5   76648    3636   1
   5  -9  -5  153433    4346  -2
   0   9   5  153433    4346   1
   6  -9  -5  147931    4447  -2
   1   9   5  147931    4447   1
   7  -9  -5   87945    4855  -2
   2   9   5   87945    4855   1
   8  -9  -5  159314    5931  -2
   3   9   5  159314    5931   1
   9  -9  -5  215969    4800  -2
   4   9   5  215969    4800   1
  10  -9  -5   10779    1959  -2
   5   9   5   10779    1959   1
  11  -9  -5  124381    3975  -2
   6   9   5  124381    3975   1
  12  -9  -5   83041    6856  -2
   7   9   5   83041    6856   1
  13  -9  -5  125108    5118  -2
   8   9   5  125108    5118   1
  14  -9  -5   55804    5672  -2
   9   9   5   55804    5672   1
  15  -9  -5    -919    7783  -2
  10   9   5    -919    7783   1
  16  -9  -5    2525    7636  -2
  11   9   5    2525    7636   1
  17  -9  -5   -2496    4835  -2
  12   9   5   -2496    4835   1
  18  -9  -5   -1932    4977  -2
  13   9   5   -1932    4977   1
  14   9   5    7182    5928   1
  15   9   5   -5438    6902   1
  16   9   5   34204    8249   1
  17   9   5   11212    7716   1
  18   9   5   36249   11177   1
 -22  10   5   49737    7192   1
 -21  10   5    9874    4904   1
 -20  10   5   18942    5216   1
 -19  10   5    6350    4332   1
 -13 -10  -5   37586    6073  -2
 -18  10   5   37586    6073   1
 -12 -10  -5   56681    6667  -2
 -17  10   5   56681    6667   1
 -11 -10  -5   53708    6402  -2
 -16  10   5   53708    6402   1
 -10 -10  -5   57918    6593  -2
 -15  10   5   57918    6593   1
  -9 -10  -5  162175    9474  -2
 -14  10   5  162175    9474   1
  -8 -10  -5  114728    6423  -2
 -13  10   5  114728    6423   1
  -7 -10  -5   55824    4818  -2
 -12  10   5   55824    4818   1
  -6 -10  -5   35692    5873  -2
 -11  10   5   35692    5873   1
  -5 -10  -5  108897    5892  -2
 -10  10   5  108897    5892   1
  -4 -10  -5    8448    2224  -2
  -9  10   5    8448    2224   1
  -3 -10  -5  204886    6165  -2
  -8  10   5  204886    6165   1
  -2 -10  -5   15841    2318  -2
  -7  10   5   15841    2318   1
  -1 -10  -5   75674    3877  -2
  -6  10   5   75674    3877   1
   0 -10  -5   36300    3476  -2
  -5  10   5   36300    3476   1
   1 -10  -5    1558    1682  -2
  -4  10   5    1558    1682   1
   2 -10  -5    9005    1872  -2
  -3  10   5    9005    1872   1
   3 -10  -5   59767    3411  -2
  -2  10   5   59767    3411   1
   4 -10  -5   28498    2556  -2
  -1  10   5   28498    2556   1
   5 -10  -5   62937    3413  -2
   0  10   5   62937    3413   1
   6 -10  -5  126443    4420  -2
   1  10   5  126443    4420   1
   7 -10  -5    6289    1856  -2
   2  10   5    6289    1856   1
   8 -10  -5   23900    2161  -2
   3  10   5   23900    2161   1
   9 -10  -5   -1420    1732  -2
   4  10   5   -1420    1732   1
  10 -10  -5   10955    1913  -2
   5  10   5   10955    1913   1
  11 -10  -5   82356    3597  -2
   6  10   5   82356    3597   1
  12 -10  -5  103785    5745  -2
   7  10   5  103785    5745   1
  13 -10  -5   67748    4491  -2
   8  10   5   67748    4491   1
  14 -10  -5   53076   10023  -2
   9  10   5   53076   10023   1
  15 -10  -5   64948    6047  -2
  10  10   5   64948    6047   1
  16 -10  -5   62583    9094  -2
  11  10   5   62583    9094   1
  17 -10  -5   94306   14912  -2
  12  10   5   94306   14912   1
  18 -10  -5    4985    5660  -2
  13  10   5    4985    5660   1
  14  10   5   43773    8358   1
  15  10   5    9515   12513   1
  16  10   5   97978   18810   1
  17  10   5   16382    6649   1
 -22  11   5   49344    7064   1
 -21  11   5   28214    6002   1
 -20  11   5   80980    8968   1
 -19  11   5   10628    4601   1
 -13 -11  -5  174364   10467  -2
 -18  11   5  174364   10467   1
 -12 -11  -5   56915    7547  -2
 -17  11   5   56915    7547   1
 -11 -11  -5  237172   11095  -2
 -16  11   5  237172   11095   1
 -10 -11  -5   49568    5890  -2
 -15  11   5   49568    5890   1
  -9 -11  -5  438551   13771  -2
 -14  11   5  438551   13771   1
  -8 -11  -5   46165    7041  -2
 -13  11   5   46165    7041   1
  -7 -11  -5  388506   12467  -2
 -12  11   5  388506   12467   1
  -6 -11  -5   36399    6883  -2
 -11  11   5   36399    6883   1
  -5 -11  -5  395642   13790  -2
 -10  11   5  395642   13790   1
  -4 -11  -5   62238    9546  -2
  -9  11   5   62238    9546   1
  -3 -11  -5  569797   12635  -2
  -8  11   5  569797   12635   1
  -2 -11  -5   38593    3832  -2
  -7  11   5   38593    3832   1
  -1 -11  -5  611355   14078  -2
  -6  11   5  611355   14078   1
   0 -11  -5   97529   10995  -2
  -5  11   5   97529   10995   1
   1 -11  -5 1180601   15977  -2
  -4  11   5 1180601   15977   1
   2 -11  -5  140140   11049  -2
  -3  11   5  140140   11049   1
   3 -11  -5 1250286   18079  -2
  -2  11   5 1250286   18079   1
   4 -11  -5  261241   15795  -2
  -1  11   5  261241   15795   1
   5 -11  -5 1049919   13970  -2
   0  11   5 1049919   13970   1
   6 -11  -5  137765   12626  -2
   1  11   5  137765   12626   1
   7 -11  -5  534389    8767  -2
   2  11   5  534389    8767   1
   8 -11  -5   80595    9605  -2
   3  11   5   80595    9605   1
   9 -11  -5  471926    9016  -2
   4  11   5  471926    9016   1
  10 -11  -5   39499    2827  -2
   5  11   5   39499    2827   1
  11 -11  -5  308881    7018  -2
   6  11   5  308881    7018   1
  12 -11  -5   33550    5859  -2
   7  11   5   33550    5859   1
  13 -11  -5  566068   13239  -2
   8  11   5  566068   13239   1
  14 -11  -5   17311    5512  -2
   9  11   5   17311    5512   1
  15 -11  -5  292977    8485  -2
  10  11   5  292977    8485   1
  16 -11  -5   21722    9071  -2
  11  11   5   21722    9071   1
  17 -11  -5  122559   14210  -2
  12  11   5  122559   14210   1
  18 -11  -5   39666    8514  -2
  13  11   5   39666    8514   1
  14  11   5   80535   18127   1
  15  11   5   11397    6045   1
  16  11   5   89373   17768   1
  17  11   5    6400    6256   1
 -21  12   5   10128    5164   1
 -20  12   5   28773    6025   1
 -19  12   5   -1760    4729   1
 -13 -12  -5   10982    4606  -2
 -18  12   5   10982    4606   1
 -12 -12  -5     872    4127  -2
 -17  12   5     872    4127   1
 -11 -12  -5   37470    6299  -2
 -16  12   5   37470    6299   1
 -10 -12  -5   -3825    3825  -2
 -15  12   5   -3825    3825   1
  -9 -12  -5   29508    5682  -2
 -14  12   5   29508    5682   1
  -8 -12  -5   37786    7112  -2
 -13  12   5   37786    7112   1
  -7 -12  -5    4787    4057  -2
 -12  12   5    4787    4057   1
  -6 -12  -5   15351    5845  -2
 -11  12   5   15351    5845   1
  -5 -12  -5   -1110    5035  -2
 -10  12   5   -1110    5035   1
  -4 -12  -5    8083    3849  -2
  -9  12   5    8083    3849   1
  -3 -12  -5   19318    4061  -2
  -8  12   5   19318    4061   1
  -2 -12  -5   39631    5102  -2
  -7  12   5   39631    5102   1
  -1 -12  -5    1258    3768  -2
  -6  12   5    1258    3768   1
   0 -12  -5   51089    5095  -2
  -5  12   5   51089    5095   1
   1 -12  -5   65937    5471  -2
  -4  12   5   65937    5471   1
   2 -12  -5    3782    2192  -2
  -3  12   5    3782    2192   1
   3 -12  -5   37694    3774  -2
  -2  12   5   37694    3774   1
   4 -12  -5   88970    5345  -2
  -1  12   5   88970    5345   1
   5 -12  -5    5352    2249  -2
   0  12   5    5352    2249   1
   6 -12  -5   -1818    1938  -2
   1  12   5   -1818    1938   1
   7 -12  -5   75949   11018  -2
   2  12   5   75949   11018   1
   8 -12  -5    -621    2063  -2
   3  12   5    -621    2063   1
   9 -12  -5    1399    2140  -2
   4  12   5    1399    2140   1
  10 -12  -5    6929    2496  -2
   5  12   5    6929    2496   1
  11 -12  -5   67227    4382  -2
   6  12   5   67227    4382   1
  12 -12  -5   16954    3337  -2
   7  12   5   16954    3337   1
  13 -12  -5  108002    7319  -2
   8  12   5  108002    7319   1
  14 -12  -5    9946    3107  -2
   9  12   5    9946    3107   1
  15 -12  -5   50904    4751  -2
  10  12   5   50904    4751   1
  16 -12  -5    6326    2197  -2
  11  12   5    6326    2197   1
  17 -12  -5   12091    6087  -2
  12  12   5   12091    6087   1
  18 -12  -5     928    6114  -2
  13  12   5     928    6114   1
  14  12   5   -4801   11112   1
  15  12   5   11079   10784   1
  16  12   5    9349    6863   1
 -20  13   5    3971    4726   1
 -19  13   5   14169    5380   1
 -13 -13  -5    6299    5838  -2
 -18  13   5    6299    5838   1
 -12 -13  -5   20100    6782  -2
 -17  13   5   20100    6782   1
 -11 -13  -5     -31    3964  -2
 -16  13   5     -31    3964   1
 -10 -13  -5     698    4058  -2
 -15  13   5     698    4058   1
  -9 -13  -5    5737    4207  -2
 -14  13   5    5737    4207   1
  -8 -13  -5    2091    4051  -2
 -13  13   5    2091    4051   1
  -7 -13  -5    -707    3841  -2
 -12  13   5    -707    3841   1
  -6 -13  -5    8860    4187  -2
 -11  13   5    8860    4187   1
  -5 -13  -5   -3128    3359  -2
 -10  13   5   -3128    3359   1
  -4 -13  -5   57743    6420  -2
  -9  13   5   57743    6420   1
  -3 -13  -5   -1431    3383  -2
  -8  13   5   -1431    3383   1
  -2 -13  -5    8890    3903  -2
  -7  13   5    8890    3903   1
  -1 -13  -5   10645    3505  -2
  -6  13   5   10645    3505   1
   0 -13  -5    3373    3156  -2
  -5  13   5    3373    3156   1
   1 -13  -5    5201    3155  -2
  -4  13   5    5201    3155   1
   2 -13  -5   24917    4359  -2
  -3  13   5   24917    4359   1
   3 -13  -5    4241    2479  -2
  -2  13   5    4241    2479   1
   4 -13  -5   51563    5757  -2
  -1  13   5   51563    5757   1
   5 -13  -5   12303    3157  -2
   0  13   5   12303    3157   1
   6 -13  -5  129625    6837  -2
   1  13   5  129625    6837   1
   7 -13  -5   20901    4426  -2
   2  13   5   20901    4426   1
   8 -13  -5   51689    4181  -2
   3  13   5   51689    4181   1
   9 -13  -5    4231    2544  -2
   4  13   5    4231    2544   1
  10 -13  -5   -2135    2135  -2
   5  13   5   -2135    2135   1
  11 -13  -5    1992    2303  -2
   6  13   5    1992    2303   1
  12 -13  -5   -1979    2231  -2
   7  13   5   -1979    2231   1
  13 -13  -5   26268    3999  -2
   8  13   5   26268    3999   1
  14 -13  -5    4086    2977  -2
   9  13   5    4086    2977   1
  15 -13  -5    9282    2539  -2
  10  13   5    9282    2539   1
  16 -13  -5    1472    3089  -2
  11  13   5    1472    3089   1
  17 -13  -5   14299    2732  -2
  12  13   5   14299    2732   1
  18 -13  -5   19011    7520  -2
  13  13   5   19011    7520   1
  14  13   5   -2798    5881   1
  15  13   5   28408    8996   1
 -19  14   5   44995    6777   1
 -13 -14  -5   36394    6381  -2
 -18  14   5   36394    6381   1
 -12 -14  -5   11174    5471  -2
 -17  14   5   11174    5471   1
 -11 -14  -5   93300   10899  -2
 -16  14   5   93300   10899   1
 -10 -14  -5   11691    4720  -2
 -15  14   5   11691    4720   1
  -9 -14  -5  110374    9109  -2
 -14  14   5  110374    9109   1
  -8 -14  -5    7988    4316  -2
 -13  14   5    7988    4316   1
  -7 -14  -5    3485    4223  -2
 -12  14   5    3485    4223   1
  -6 -14  -5   26101    5506  -2
 -11  14   5   26101    5506   1
  -5 -14  -5    2150    4015  -2
 -10  14   5    2150    4015   1
  -4 -14  -5   48387    8294  -2
  -9  14   5   48387    8294   1
  -3 -14  -5   48043    6121  -2
  -8  14   5   48043    6121   1
  -2 -14  -5   54295    6280  -2
  -7  14   5   54295    6280   1
  -1 -14  -5   54684    6163  -2
  -6  14   5   54684    6163   1
   0 -14  -5   48806    5958  -2
  -5  14   5   48806    5958   1
   1 -14  -5   26775    4779  -2
  -4  14   5   26775    4779   1
   2 -14  -5   35533    5267  -2
  -3  14   5   35533    5267   1
   3 -14  -5    4427    3539  -2
  -2  14   5    4427    3539   1
   4 -14  -5   68440    6683  -2
  -1  14   5   68440    6683   1
   5 -14  -5   73993    5088  -2
   0  14   5   73993    5088   1
   6 -14  -5  114178    6385  -2
   1  14   5  114178    6385   1
   7 -14  -5   28468    3843  -2
   2  14   5   28468    3843   1
   8 -14  -5   11406    3028  -2
   3  14   5   11406    3028   1
   9 -14  -5   69650    5016  -2
   4  14   5   69650    5016   1
  10 -14  -5   11465    3714  -2
   5  14   5   11465    3714   1
  11 -14  -5   85581    6871  -2
   6  14   5   85581    6871   1
  12 -14  -5     793    2415  -2
   7  14   5     793    2415   1
  13 -14  -5   15439    3084  -2
   8  14   5   15439    3084   1
  14 -14  -5    3935    2490  -2
   9  14   5    3935    2490   1
  15 -14  -5    5774    2511  -2
  10  14   5    5774    2511   1
  16 -14  -5    3134    3510  -2
  11  14   5    3134    3510   1
  17 -14  -5    5204    2593  -2
  12  14   5    5204    2593   1
  18 -14  -5    7012    3390  -2
  13  14   5    7012    3390   1
  14  14   5   22786    8800   1
 -13 -15  -5  136498   10933  -2
 -18  15   5  136498   10933   1
 -12 -15  -5    8613    4651  -2
 -17  15   5    8613    4651   1
 -11 -15  -5  174368   11078  -2
 -16  15   5  174368   11078   1
 -10 -15  -5   24901    6454  -2
 -15  15   5   24901    6454   1
  -9 -15  -5  190326   11511  -2
 -14  15   5  190326   11511   1
  -8 -15  -5   12290    6306  -2
 -13  15   5   12290    6306   1
  -7 -15  -5  261962   12695  -2
 -12  15   5  261962   12695   1
  -6 -15  -5   23372    4960  -2
 -11  15   5   23372    4960   1
  -5 -15  -5  218468   12145  -2
 -10  15   5  218468   12145   1
  -4 -15  -5   27873    8742  -2
  -9  15   5   27873    8742   1
  -3 -15  -5  324161   12266  -2
  -8  15   5  324161   12266   1
  -2 -15  -5   32165    8261  -2
  -7  15   5   32165    8261   1
  -1 -15  -5  314009   11840  -2
  -6  15   5  314009   11840   1
   0 -15  -5  111107    7721  -2
  -5  15   5  111107    7721   1
   1 -15  -5  407511   15778  -2
  -4  15   5  407511   15778   1
   2 -15  -5  124373    8003  -2
  -3  15   5  124373    8003   1
   3 -15  -5  665085   17457  -2
  -2  15   5  665085   17457   1
   4 -15  -5   83493    8237  -2
  -1  15   5   83493    8237   1
   5 -15  -5  443777   13381  -2
   0  15   5  443777   13381   1
   6 -15  -5  102272   10126  -2
   1  15   5  102272   10126   1
   7 -15  -5  333636   11615  -2
   2  15   5  333636   11615   1
   8 -15  -5   31971    3497  -2
   3  15   5   31971    3497   1
   9 -15  -5  283070    8279  -2
   4  15   5  283070    8279   1
  10 -15  -5   20406    3696  -2
   5  15   5   20406    3696   1
  11 -15  -5  232356   10796  -2
   6  15   5  232356   10796   1
  12 -15  -5   23321    3184  -2
   7  15   5   23321    3184   1
  13 -15  -5  212458    9801  -2
   8  15   5  212458    9801   1
  14 -15  -5    5475    2907  -2
   9  15   5    5475    2907   1
  15 -15  -5  259527    9403  -2
  10  15   5  259527    9403   1
  16 -15  -5   33837    5076  -2
  11  15   5   33837    5076   1
  17 -15  -5  159723    6857  -2
  12  15   5  159723    6857   1
  18 -15  -5   11916    3121  -2
  13  15   5   11916    3121   1
 -12 -16  -5   12303    6565  -2
 -17  16   5   12303    6565   1
 -11 -16  -5   10428    6024  -2
 -16  16   5   10428    6024   1
 -10 -16  -5   20632    6085  -2
 -15  16   5   20632    6085   1
  -9 -16  -5   17544    5287  -2
 -14  16   5   17544    5287   1
  -8 -16  -5    4298    4787  -2
 -13  16   5    4298    4787   1
  -7 -16  -5    1610    4236  -2
 -12  16   5    1610    4236   1
  -6 -16  -5    5149    4211  -2
 -11  16   5    5149    4211   1
  -5 -16  -5   10134    4752  -2
 -10  16   5   10134    4752   1
  -4 -16  -5    7993    4244  -2
  -9  16   5    7993    4244   1
  -3 -16  -5   69333    8049  -2
  -8  16   5   69333    8049   1
  -2 -16  -5   -3539    3539  -2
  -7  16   5   -3539    3539   1
  -1 -16  -5   -1023    3826  -2
  -6  16   5   -1023    3826   1
   0 -16  -5    5525    4291  -2
  -5  16   5    5525    4291   1
   1 -16  -5    8938    4691  -2
  -4  16   5    8938    4691   1
   2 -16  -5    2324    5925  -2
  -3  16   5    2324    5925   1
   3 -16  -5   -1224    3653  -2
  -2  16   5   -1224    3653   1
   4 -16  -5    4652    3797  -2
  -1  16   5    4652    3797   1
   5 -16  -5   -1371    3786  -2
   0  16   5   -1371    3786   1
   6 -16  -5    5478    3950  -2
   1  16   5    5478    3950   1
   7 -16  -5    4734    3931  -2
   2  16   5    4734    3931   1
   8 -16  -5   19924    4551  -2
   3  16   5   19924    4551   1
   9 -16  -5    5916    3991  -2
   4  16   5    5916    3991   1
  10 -16  -5    3102    3851  -2
   5  16   5    3102    3851   1
  11 -16  -5   51278    7165  -2
   6  16   5   51278    7165   1
  12 -16  -5   -1451    2530  -2
   7  16   5   -1451    2530   1
  13 -16  -5   61051    6535  -2
   8  16   5   61051    6535   1
  14 -16  -5    1501    3056  -2
   9  16   5    1501    3056   1
  15 -16  -5   22087    3855  -2
  10  16   5   22087    3855   1
  16 -16  -5   -3715    3715  -2
  11  16   5   -3715    3715   1
  17 -16  -5   11720    3211  -2
  12  16   5   11720    3211   1
 -11 -17  -5   -4244    4244  -2
 -16  17   5   -4244    4244   1
 -10 -17  -5   27073    6124  -2
 -15  17   5   27073    6124   1
  -9 -17  -5    -347    4723  -2
 -14  17   5    -347    4723   1
  -8 -17  -5   17217    5526  -2
 -13  17   5   17217    5526   1
  -7 -17  -5   17369    5838  -2
 -12  17   5   17369    5838   1
  -6 -17  -5   21893    5954  -2
 -11  17   5   21893    5954   1
  -5 -17  -5   55886    7444  -2
 -10  17   5   55886    7444   1
  -4 -17  -5   45336    6568  -2
  -9  17   5   45336    6568   1
  -3 -17  -5   10467    4674  -2
  -8  17   5   10467    4674   1
  -2 -17  -5   33961    6223  -2
  -7  17   5   33961    6223   1
  -1 -17  -5    3052    4715  -2
  -6  17   5    3052    4715   1
   0 -17  -5   29031    5589  -2
  -5  17   5   29031    5589   1
   1 -17  -5     338    3866  -2
  -4  17   5     338    3866   1
   2 -17  -5   28227    5494  -2
  -3  17   5   28227    5494   1
   3 -17  -5   11470    4551  -2
  -2  17   5   11470    4551   1
   4 -17  -5    9815    4856  -2
  -1  17   5    9815    4856   1
   5 -17  -5    4509    3870  -2
   0  17   5    4509    3870   1
   6 -17  -5   10091    4691  -2
   1  17   5   10091    4691   1
   7 -17  -5   12764    4563  -2
   2  17   5   12764    4563   1
   8 -17  -5    8278    4409  -2
   3  17   5    8278    4409   1
   9 -17  -5    5907    3995  -2
   4  17   5    5907    3995   1
  10 -17  -5    7228    4327  -2
   5  17   5    7228    4327   1
  11 -17  -5   42451    6125  -2
   6  17   5   42451    6125   1
  12 -17  -5   10150    7806  -2
   7  17   5   10150    7806   1
  13 -17  -5    8973    5279  -2
   8  17   5    8973    5279   1
  14 -17  -5    2267    4462  -2
   9  17   5    2267    4462   1
  15 -17  -5   -2611    2791  -2
  10  17   5   -2611    2791   1
  16 -17  -5   -1568    6269  -2
  11  17   5   -1568    6269   1
  -9 -18  -5    6870    5065  -2
 -14  18   5    6870    5065   1
  -8 -18  -5   12737    5823  -2
 -13  18   5   12737    5823   1
  -7 -18  -5    7333    5755  -2
 -12  18   5    7333    5755   1
  -6 -18  -5   15345    6504  -2
 -11  18   5   15345    6504   1
  -5 -18  -5    -928    4305  -2
 -10  18   5    -928    4305   1
  -4 -18  -5    9358    6226  -2
  -9  18   5    9358    6226   1
  -3 -18  -5    5771    4998  -2
  -8  18   5    5771    4998   1
  -2 -18  -5   -3830    3830  -2
  -7  18   5   -3830    3830   1
  -1 -18  -5   12302    5121  -2
  -6  18   5   12302    5121   1
   0 -18  -5   -1641    4098  -2
  -5  18   5   -1641    4098   1
   1 -18  -5   14956    4935  -2
  -4  18   5   14956    4935   1
   2 -18  -5   15885    4904  -2
  -3  18   5   15885    4904   1
   3 -18  -5   22595    5650  -2
  -2  18   5   22595    5650   1
   4 -18  -5    2047    6092  -2
  -1  18   5    2047    6092   1
   5 -18  -5     223    3764  -2
   0  18   5     223    3764   1
   6 -18  -5    1611    4254  -2
   1  18   5    1611    4254   1
   7 -18  -5    5622    4249  -2
   2  18   5    5622    4249   1
   8 -18  -5   -2505    3865  -2
   3  18   5   -2505    3865   1
   9 -18  -5   17133    7140  -2
   4  18   5   17133    7140   1
  10 -18  -5   -3973    3973  -2
   5  18   5   -3973    3973   1
  11 -18  -5   33912    6019  -2
   6  18   5   33912    6019   1
  12 -18  -5   -4416    5875  -2
   7  18   5   -4416    5875   1
  13 -18  -5    2043    4397  -2
   8  18   5    2043    4397   1
  14 -18  -5    4938    7501  -2
   9  18   5    4938    7501   1
  -7 -19  -5  149855   18136  -2
 -12  19   5  149855   18136   1
  -6 -19  -5    7317    5998  -2
 -11  19   5    7317    5998   1
  -5 -19  -5  246833   14015  -2
 -10  19   5  246833   14015   1
  -4 -19  -5   12730    5239  -2
  -9  19   5   12730    5239   1
  -3 -19  -5  239173   15288  -2
  -8  19   5  239173   15288   1
  -2 -19  -5   30293    6884  -2
  -7  19   5   30293    6884   1
  -1 -19  -5  209997   12138  -2
  -6  19   5  209997   12138   1
   0 -19  -5   22783    5534  -2
  -5  19   5   22783    5534   1
   1 -19  -5  158573   11184  -2
  -4  19   5  158573   11184   1
   2 -19  -5   17795    5222  -2
  -3  19   5   17795    5222   1
   3 -19  -5   94569    9927  -2
  -2  19   5   94569    9927   1
   4 -19  -5    4249    6078  -2
  -1  19   5    4249    6078   1
   5 -19  -5  192726   17827  -2
   0  19   5  192726   17827   1
   6 -19  -5   16821    4807  -2
   1  19   5   16821    4807   1
   7 -19  -5  332804   13160  -2
   2  19   5  332804   13160   1
   8 -19  -5   27861    5620  -2
   3  19   5   27861    5620   1
   9 -19  -5  318169   13163  -2
   4  19   5  318169   13163   1
  10 -19  -5   10306    4592  -2
   5  19   5   10306    4592   1
  11 -19  -5  193314   15646  -2
   6  19   5  193314   15646   1
  12 -19  -5    2605    4425  -2
   7  19   5    2605    4425   1
  13 -19  -5   94695   25908  -2
   8  19   5   94695   25908   1
  -5 -20  -5   16856    5608  -2
 -10  20   5   16856    5608   1
  -4 -20  -5   -2705    4004  -2
  -9  20   5   -2705    4004   1
  -3 -20  -5   28342    8765  -2
  -8  20   5   28342    8765   1
  -2 -20  -5    6352    6887  -2
  -7  20   5    6352    6887   1
  -1 -20  -5    4093    4641  -2
  -6  20   5    4093    4641   1
   0 -20  -5   15256    7531  -2
  -5  20   5   15256    7531   1
   1 -20  -5   16071    7146  -2
  -4  20   5   16071    7146   1
   2 -20  -5   -2840    4221  -2
  -3  20   5   -2840    4221   1
   3 -20  -5   13094    5332  -2
  -2  20   5   13094    5332   1
   4 -20  -5   32804    6668  -2
  -1  20   5   32804    6668   1
   5 -20  -5   -1449    4062  -2
   0  20   5   -1449    4062   1
   6 -20  -5   48884    7409  -2
   1  20   5   48884    7409   1
   7 -20  -5   -1227    4116  -2
   2  20   5   -1227    4116   1
   8 -20  -5   -3433    4220  -2
   3  20   5   -3433    4220   1
   9 -20  -5     130    4414  -2
   4  20   5     130    4414   1
  10 -20  -5    5066    4698  -2
   5  20   5    5066    4698   1
  -1 -21  -5   18213    6164  -2
  -6  21   5   18213    6164   1
   0 -21  -5   17165    5966  -2
  -5  21   5   17165    5966   1
   1 -21  -5    2532    5577  -2
  -4  21   5    2532    5577   1
   2 -21  -5   19078    6151  -2
  -3  21   5   19078    6151   1
   3 -21  -5   27066    6264  -2
  -2  21   5   27066    6264   1
   4 -21  -5     730    4324  -2
  -1  21   5     730    4324   1
   5 -21  -5   14163    7675  -2
   0  21   5   14163    7675   1
   6 -21  -5    8575    5464  -2
   1  21   5    8575    5464   1
 -25   0   6   63443   23738   1
 -24   0   6    5490    7747   1
 -23   0   6   70331   10921   1
 -22   0   6   31084    7706   1
 -21   0   6  190965   15983   1
 -20   0   6  134923   12785   1
 -19   0   6  125625   12816   1
 -12   0  -6  310065   21194  -2
 -18   0   6  310065   21194   1
 -11   0  -6   85364   10027  -2
 -17   0   6   85364   10027   1
 -10   0  -6  256655    9727  -2
 -16   0   6  256655    9727   1
  -9   0  -6   10756    3515  -2
 -15   0   6   10756    3515   1
  -8   0  -6  145736   15962  -2
 -14   0   6  145736   15962   1
  -7   0  -6    8375    3046  -2
 -13   0   6    8375    3046   1
  -6   0  -6  110922    6121  -2
 -12   0   6  110922    6121   1
  -5   0  -6   61598    5084  -2
 -11   0   6   61598    5084   1
  -4   0  -6  521261   13178  -2
 -10   0   6  521261   13178   1
  -3   0  -6   66054    4864  -2
  -9   0   6   66054    4864   1
  -2   0  -6  411211    9950  -2
  -8   0   6  411211    9950   1
  -1   0  -6    5740    2454  -2
  -7   0   6    5740    2454   1
   0   0  -6 1692159   25447  -2
  -6   0   6 1692159   25447   1
   1   0  -6    3768    2093  -2
  -5   0   6    3768    2093   1
   2   0  -6 1396607   21120  -2
  -4   0   6 1396607   21120   1
   3   0  -6    4160    1967  -2
  -3   0   6    4160    1967   1
   4   0  -6 1472320   21238  -2
  -2   0   6 1472320   21238   1
   5   0  -6    4066    1631  -2
  -1   0   6    4066    1631   1
   6   0  -6 1571705   21777  -2
   0   0   6 1571705   21777   1
   7   0  -6    8201    1648  -2
   1   0   6    8201    1648   1
   8   0  -6  656476   10479  -2
   2   0   6  656476   10479   1
   9   0  -6   50314    2413  -2
   3   0   6   50314    2413   1
  10   0  -6 1129931   15522  -2
   4   0   6 1129931   15522   1
  11   0  -6    6007    1846  -2
   5   0   6    6007    1846   1
  12   0  -6  635125   19055  -2
   6   0   6  635125   19055   1
 -25   1   6    3345    4834   1
 -24   1   6   13237    5755   1
 -23   1   6   20519    6017   1
 -22   1   6   40157    6635   1
 -21   1   6   10113    4839   1
 -20   1   6  369681   13554   1
 -19   1   6   10470    4604   1
 -12  -1  -6  478248   14209  -2
 -18   1   6  478248   14209   1
 -11  -1  -6    9888    2864  -2
 -17   1   6    9888    2864   1
 -10  -1  -6  126499    6671  -2
 -16   1   6  126499    6671   1
  -9  -1  -6   16381    2765  -2
 -15   1   6   16381    2765   1
  -8  -1  -6  386707    8713  -2
 -14   1   6  386707    8713   1
  -7  -1  -6     250    1972  -2
 -13   1   6     250    1972   1
  -6  -1  -6  574723   10059  -2
 -12   1   6  574723   10059   1
  -5  -1  -6    6613    2067  -2
 -11   1   6    6613    2067   1
  -4  -1  -6  739324   10691  -2
 -10   1   6  739324   10691   1
  -3  -1  -6  172827    6236  -2
  -9   1   6  172827    6236   1
  -2  -1  -6  225332    5496  -2
  -8   1   6  225332    5496   1
  -1  -1  -6   40523    2632  -2
  -7   1   6   40523    2632   1
   0  -1  -6  190688    5541  -2
  -6   1   6  190688    5541   1
   1  -1  -6   27873    2540  -2
  -5   1   6   27873    2540   1
   2  -1  -6  330348    5447  -2
  -4   1   6  330348    5447   1
   3  -1  -6    3543    1479  -2
  -3   1   6    3543    1479   1
   4  -1  -6  288647    5366  -2
  -2   1   6  288647    5366   1
   5  -1  -6   83842    2728  -2
  -1   1   6   83842    2728   1
   6  -1  -6   84998    2863  -2
   0   1   6   84998    2863   1
   7  -1  -6   40098    1745  -2
   1   1   6   40098    1745   1
   8  -1  -6   69646    1946  -2
   2   1   6   69646    1946   1
   9  -1  -6  179254    4498  -2
   3   1   6  179254    4498   1
  10  -1  -6  408861    7380  -2
   4   1   6  408861    7380   1
  11  -1  -6     437    1710  -2
   5   1   6     437    1710   1
  12  -1  -6  380064   10211  -2
   6   1   6  380064   10211   1
  13  -1  -6   14165    1942  -2
   7   1   6   14165    1942   1
  14  -1  -6  138978    4336  -2
   8   1   6  138978    4336   1
  15  -1  -6   16749    2979  -2
   9   1   6   16749    2979   1
  16  -1  -6   24330    3117  -2
  10   1   6   24330    3117   1
  17  -1  -6    3956    2288  -2
  11   1   6    3956    2288   1
  18  -1  -6   20602    3334  -2
  12   1   6   20602    3334   1
  13   1   6   39908    3398   1
  14   1   6   14555    4765   1
  15   1   6   76557    4284   1
  16   1   6    2326    2256   1
  17   1   6    8934    4014   1
 -25   2   6    2172    4694   1
 -24   2   6   12563    5329   1
 -23   2   6    7406    4928   1
 -22   2   6    7855    4785   1
 -21   2   6   29972    5939   1
 -20   2   6    3212   12354   1
 -19   2   6    2252    4155   1
 -12  -2  -6   21509    7258  -2
 -18   2   6   21509    7258   1
 -11  -2  -6   28388    4368  -2
 -17   2   6   28388    4368   1
 -10  -2  -6   12846    2691  -2
 -16   2   6   12846    2691   1
  -9  -2  -6   16626    2835  -2
 -15   2   6   16626    2835   1
  -8  -2  -6   26189    2858  -2
 -14   2   6   26189    2858   1
  -7  -2  -6   40203    3410  -2
 -13   2   6   40203    3410   1
  -6  -2  -6   19767    2571  -2
 -12   2   6   19767    2571   1
  -5  -2  -6     355    1884  -2
 -11   2   6     355    1884   1
  -4  -2  -6   10265    2346  -2
 -10   2   6   10265    2346   1
  -3  -2  -6   51173    3117  -2
  -9   2   6   51173    3117   1
  -2  -2  -6  114411    5732  -2
  -8   2   6  114411    5732   1
  -1  -2  -6    2408    1663  -2
  -7   2   6    2408    1663   1
   0  -2  -6   60638    3020  -2
  -6   2   6   60638    3020   1
   1  -2  -6  129413    3760  -2
  -5   2   6  129413    3760   1
   2  -2  -6   12656    2176  -2
  -4   2   6   12656    2176   1
   3  -2  -6     -14    1267  -2
  -3   2   6     -14    1267   1
   4  -2  -6   11301    1475  -2
  -2   2   6   11301    1475   1
   5  -2  -6  132947    3066  -2
  -1   2   6  132947    3066   1
   6  -2  -6   32412    2203  -2
   0   2   6   32412    2203   1
   7  -2  -6    2354    1153  -2
   1   2   6    2354    1153   1
   8  -2  -6  145899    2859  -2
   2   2   6  145899    2859   1
   9  -2  -6    9553    1973  -2
   3   2   6    9553    1973   1
  10  -2  -6   82412    5791  -2
   4   2   6   82412    5791   1
  11  -2  -6    5174    2527  -2
   5   2   6    5174    2527   1
  12  -2  -6  106063    4280  -2
   6   2   6  106063    4280   1
  13  -2  -6    1382    3782  -2
   7   2   6    1382    3782   1
  14  -2  -6  106136    4494  -2
   8   2   6  106136    4494   1
  15  -2  -6    4916    2087  -2
   9   2   6    4916    2087   1
  16  -2  -6   20971    2733  -2
  10   2   6   20971    2733   1
  17  -2  -6   10227    2552  -2
  11   2   6   10227    2552   1
  18  -2  -6    5786    2626  -2
  12   2   6    5786    2626   1
  13   2   6     925    2446   1
  14   2   6    9483    3165   1
  15   2   6   19441    4325   1
  16   2   6    3528    2729   1
  17   2   6   12593    4530   1
  18   2   6    -369    2306   1
  19   2   6   -1096    1909   1
 -25   3   6   11349    6038   1
 -24   3   6   49223    7215   1
 -23   3   6    2612    4764   1
 -22   3   6  115711    9150   1
 -21   3   6    5581    4690   1
 -20   3   6   45469    6681   1
 -19   3   6   22432    6622   1
 -12  -3  -6   46965    6158  -2
 -18   3   6   46965    6158   1
 -11  -3  -6   62671    5233  -2
 -17   3   6   62671    5233   1
 -10  -3  -6  210569    6976  -2
 -16   3   6  210569    6976   1
  -9  -3  -6   14232    3062  -2
 -15   3   6   14232    3062   1
  -8  -3  -6  198984    6608  -2
 -14   3   6  198984    6608   1
  -7  -3  -6    -199    1987  -2
 -13   3   6    -199    1987   1
  -6  -3  -6   22102    2670  -2
 -12   3   6   22102    2670   1
  -5  -3  -6    1080    1903  -2
 -11   3   6    1080    1903   1
  -4  -3  -6  134831    4949  -2
 -10   3   6  134831    4949   1
  -3  -3  -6   18822    2321  -2
  -9   3   6   18822    2321   1
  -2  -3  -6  158417    4554  -2
  -8   3   6  158417    4554   1
  -1  -3  -6   52330    2967  -2
  -7   3   6   52330    2967   1
   0  -3  -6   41225    2612  -2
  -6   3   6   41225    2612   1
   1  -3  -6   28290    2199  -2
  -5   3   6   28290    2199   1
   2  -3  -6  249135    4814  -2
  -4   3   6  249135    4814   1
   3  -3  -6    -329    1203  -2
  -3   3   6    -329    1203   1
   4  -3  -6  223842    4250  -2
  -2   3   6  223842    4250   1
   5  -3  -6   51782    2346  -2
  -1   3   6   51782    2346   1
   6  -3  -6   43425    2051  -2
   0   3   6   43425    2051   1
   7  -3  -6   15780    1733  -2
   1   3   6   15780    1733   1
   8  -3  -6   62033    2819  -2
   2   3   6   62033    2819   1
   9  -3  -6   31400    2833  -2
   3   3   6   31400    2833   1
  10  -3  -6   65780    5228  -2
   4   3   6   65780    5228   1
  11  -3  -6    3738    2022  -2
   5   3   6    3738    2022   1
  12  -3  -6   19657    2580  -2
   6   3   6   19657    2580   1
  13  -3  -6   11354    3438  -2
   7   3   6   11354    3438   1
  14  -3  -6   26844    2765  -2
   8   3   6   26844    2765   1
  15  -3  -6   11770    2491  -2
   9   3   6   11770    2491   1
  16  -3  -6   18327    2557  -2
  10   3   6   18327    2557   1
  17  -3  -6  141696    5797  -2
  11   3   6  141696    5797   1
  18  -3  -6    2149    2462  -2
  12   3   6    2149    2462   1
  13   3   6   37039    4230   1
  14   3   6   17481    3226   1
  15   3   6   12369    3271   1
  16   3   6   11902    3276   1
  17   3   6   25360    3918   1
  18   3   6    1180    3037   1
  19   3   6    7803    4611   1
 -25   4   6   53580    7518   1
 -24   4   6   12277    4830   1
 -23   4   6    3849    5111   1
 -22   4   6   12737    4632   1
 -21   4   6    -857    4202   1
 -20   4   6   25041    5091   1
 -19   4   6   36551    6773   1
 -12  -4  -6   64266   10018  -2
 -18   4   6   64266   10018   1
 -11  -4  -6  216340    8335  -2
 -17   4   6  216340    8335   1
 -10  -4  -6  110748    5992  -2
 -16   4   6  110748    5992   1
  -9  -4  -6   64035    4184  -2
 -15   4   6   64035    4184   1
  -8  -4  -6  344564   11611  -2
 -14   4   6  344564   11611   1
  -7  -4  -6   10567    2355  -2
 -13   4   6   10567    2355   1
  -6  -4  -6  484170    9188  -2
 -12   4   6  484170    9188   1
  -5  -4  -6   76948    4959  -2
 -11   4   6   76948    4959   1
  -4  -4  -6  583738    9310  -2
 -10   4   6  583738    9310   1
  -3  -4  -6   91825    4041  -2
  -9   4   6   91825    4041   1
  -2  -4  -6  684846    9872  -2
  -8   4   6  684846    9872   1
  -1  -4  -6   35414    2590  -2
  -7   4   6   35414    2590   1
   0  -4  -6  309691    5883  -2
  -6   4   6  309691    5883   1
   1  -4  -6   11108    1826  -2
  -5   4   6   11108    1826   1
   2  -4  -6  664090    8872  -2
  -4   4   6  664090    8872   1
   3  -4  -6    -865    1283  -2
  -3   4   6    -865    1283   1
   4  -4  -6  750100    9287  -2
  -2   4   6  750100    9287   1
   5  -4  -6    5361    1369  -2
  -1   4   6    5361    1369   1
   6  -4  -6  395217    5694  -2
   0   4   6  395217    5694   1
   7  -4  -6   11546    1694  -2
   1   4   6   11546    1694   1
   8  -4  -6  976804   12378  -2
   2   4   6  976804   12378   1
   9  -4  -6  104689    4930  -2
   3   4   6  104689    4930   1
  10  -4  -6  917445   24034  -2
   4   4   6  917445   24034   1
  11  -4  -6   13806    2397  -2
   5   4   6   13806    2397   1
  12  -4  -6  561574   10935  -2
   6   4   6  561574   10935   1
  13  -4  -6   38254    3425  -2
   7   4   6   38254    3425   1
  14  -4  -6  770673   19692  -2
   8   4   6  770673   19692   1
  15  -4  -6    8392    3612  -2
   9   4   6    8392    3612   1
  16  -4  -6  334342    8904  -2
  10   4   6  334342    8904   1
  17  -4  -6    4885    2845  -2
  11   4   6    4885    2845   1
  18  -4  -6  284758    8602  -2
  12   4   6  284758    8602   1
  13   4   6    4959    3041   1
  14   4   6  263568    8625   1
  15   4   6   11190    3420   1
  16   4   6  188400   11954   1
  17   4   6    3786    4065   1
  18   4   6   69160   12773   1
  19   4   6    2021    2964   1
 -25   5   6    3314    4833   1
 -24   5   6   38585    6871   1
 -23   5   6   11446    7361   1
 -22   5   6  155775   10572   1
 -21   5   6    4853    4412   1
 -20   5   6  252488   12033   1
 -19   5   6    7708    5146   1
 -12  -5  -6  219399   11344  -2
 -18   5   6  219399   11344   1
 -11  -5  -6    7059    3170  -2
 -17   5   6    7059    3170   1
 -10  -5  -6  142907    9595  -2
 -16   5   6  142907    9595   1
  -9  -5  -6  215342    7577  -2
 -15   5   6  215342    7577   1
  -8  -5  -6  278713    6988  -2
 -14   5   6  278713    6988   1
  -7  -5  -6   45199    3675  -2
 -13   5   6   45199    3675   1
  -6  -5  -6  364524    7530  -2
 -12   5   6  364524    7530   1
  -5  -5  -6   21861    2677  -2
 -11   5   6   21861    2677   1
  -4  -5  -6  402430    7611  -2
 -10   5   6  402430    7611   1
  -3  -5  -6    6566    2000  -2
  -9   5   6    6566    2000   1
  -2  -5  -6  716037   10313  -2
  -8   5   6  716037   10313   1
  -1  -5  -6   10963    2054  -2
  -7   5   6   10963    2054   1
   0  -5  -6  270845    6629  -2
  -6   5   6  270845    6629   1
   1  -5  -6   18578    2059  -2
  -5   5   6   18578    2059   1
   2  -5  -6  375408    6343  -2
  -4   5   6  375408    6343   1
   3  -5  -6    8156    1656  -2
  -3   5   6    8156    1656   1
   4  -5  -6  317391    7750  -2
  -2   5   6  317391    7750   1
   5  -5  -6  101628    3506  -2
  -1   5   6  101628    3506   1
   6  -5  -6  206088    5227  -2
   0   5   6  206088    5227   1
   7  -5  -6    5877    1725  -2
   1   5   6    5877    1725   1
   8  -5  -6  470994    7396  -2
   2   5   6  470994    7396   1
   9  -5  -6   25174    2267  -2
   3   5   6   25174    2267   1
  10  -5  -6  276849    7495  -2
   4   5   6  276849    7495   1
  11  -5  -6   28387    3711  -2
   5   5   6   28387    3711   1
  12  -5  -6  135285    5446  -2
   6   5   6  135285    5446   1
  13  -5  -6    9191    2545  -2
   7   5   6    9191    2545   1
  14  -5  -6   38305    4468  -2
   8   5   6   38305    4468   1
  15  -5  -6  207312    7408  -2
   9   5   6  207312    7408   1
  16  -5  -6   47335    4309  -2
  10   5   6   47335    4309   1
  17  -5  -6   61288    4964  -2
  11   5   6   61288    4964   1
  18  -5  -6   20816    3679  -2
  12   5   6   20816    3679   1
  13   5   6    -520    2975   1
  14   5   6   38411    9990   1
  15   5   6    4160    3242   1
  16   5   6    7313    3445   1
  17   5   6    2742    3481   1
  18   5   6   22675    7076   1
  19   5   6   10255    7663   1
 -24   6   6   15393    5603   1
 -23   6   6   10107    5199   1
 -22   6   6    2433    4549   1
 -21   6   6    3717    4402   1
 -20   6   6    6760    4354   1
 -19   6   6    4635    5153   1
 -12  -6  -6    1898    4106  -2
 -18   6   6    1898    4106   1
 -11  -6  -6   50450    6197  -2
 -17   6   6   50450    6197   1
 -10  -6  -6   12591    3872  -2
 -16   6   6   12591    3872   1
  -9  -6  -6   19606    3364  -2
 -15   6   6   19606    3364   1
  -8  -6  -6   -2215    2215  -2
 -14   6   6   -2215    2215   1
  -7  -6  -6   29281    3032  -2
 -13   6   6   29281    3032   1
  -6  -6  -6   35703    3252  -2
 -12   6   6   35703    3252   1
  -5  -6  -6    1154    1843  -2
 -11   6   6    1154    1843   1
  -4  -6  -6   10265    2144  -2
 -10   6   6   10265    2144   1
  -3  -6  -6   71955    3753  -2
  -9   6   6   71955    3753   1
  -2  -6  -6  215673    5414  -2
  -8   6   6  215673    5414   1
  -1  -6  -6    9952    2035  -2
  -7   6   6    9952    2035   1
   0  -6  -6  142843    4691  -2
  -6   6   6  142843    4691   1
   1  -6  -6    4559    1647  -2
  -5   6   6    4559    1647   1
   2  -6  -6  119581    4046  -2
  -4   6   6  119581    4046   1
   3  -6  -6   37089    2822  -2
  -3   6   6   37089    2822   1
   4  -6  -6  126897    3910  -2
  -2   6   6  126897    3910   1
   5  -6  -6    9860    2120  -2
  -1   6   6    9860    2120   1
   6  -6  -6  264677    4957  -2
   0   6   6  264677    4957   1
   7  -6  -6   71220    2927  -2
   1   6   6   71220    2927   1
   8  -6  -6  234813    4371  -2
   2   6   6  234813    4371   1
   9  -6  -6   44533    2195  -2
   3   6   6   44533    2195   1
  10  -6  -6   24542    4205  -2
   4   6   6   24542    4205   1
  11  -6  -6   23847    3266  -2
   5   6   6   23847    3266   1
  12  -6  -6   23139    3462  -2
   6   6   6   23139    3462   1
  13  -6  -6  148142    6930  -2
   7   6   6  148142    6930   1
  14  -6  -6    6660    2817  -2
   8   6   6    6660    2817   1
  15  -6  -6   52563    4691  -2
   9   6   6   52563    4691   1
  16  -6  -6    6783    5544  -2
  10   6   6    6783    5544   1
  17  -6  -6    3765    3527  -2
  11   6   6    3765    3527   1
  18  -6  -6   11607    3731  -2
  12   6   6   11607    3731   1
  13   6   6   -1895    3193   1
  14   6   6   58775    5454   1
  15   6   6   -1551    4648   1
  16   6   6   19659    4891   1
  17   6   6    9702    5537   1
  18   6   6   19250    6297   1
 -24   7   6   46058   15646   1
 -23   7   6    5485    4733   1
 -22   7   6    -525    4126   1
 -21   7   6    5475    5073   1
 -20   7   6   14820    5028   1
 -19   7   6    4661    6603   1
 -12  -7  -6   33425    6233  -2
 -18   7   6   33425    6233   1
 -11  -7  -6     961    4060  -2
 -17   7   6     961    4060   1
 -10  -7  -6  153130    7607  -2
 -16   7   6  153130    7607   1
  -9  -7  -6     359    2973  -2
 -15   7   6     359    2973   1
  -8  -7  -6  203583    7982  -2
 -14   7   6  203583    7982   1
  -7  -7  -6   -2244    2244  -2
 -13   7   6   -2244    2244   1
  -6  -7  -6  106054    5027  -2
 -12   7   6  106054    5027   1
  -5  -7  -6    3126    2274  -2
 -11   7   6    3126    2274   1
  -4  -7  -6  161417    5397  -2
 -10   7   6  161417    5397   1
  -3  -7  -6  164836    6167  -2
  -9   7   6  164836    6167   1
  -2  -7  -6   30596    2859  -2
  -8   7   6   30596    2859   1
  -1  -7  -6    3759    1763  -2
  -7   7   6    3759    1763   1
   0  -7  -6    8125    1949  -2
  -6   7   6    8125    1949   1
   1  -7  -6   55139    3221  -2
  -5   7   6   55139    3221   1
   2  -7  -6  115749    4303  -2
  -4   7   6  115749    4303   1
   3  -7  -6    1792    1966  -2
  -3   7   6    1792    1966   1
   4  -7  -6   66932    3167  -2
  -2   7   6   66932    3167   1
   5  -7  -6   15271    2112  -2
  -1   7   6   15271    2112   1
   6  -7  -6   49600    2793  -2
   0   7   6   49600    2793   1
   7  -7  -6   29256    2278  -2
   1   7   6   29256    2278   1
   8  -7  -6   49247    3179  -2
   2   7   6   49247    3179   1
   9  -7  -6   47284    2618  -2
   3   7   6   47284    2618   1
  10  -7  -6   29943    2582  -2
   4   7   6   29943    2582   1
  11  -7  -6    2157    2210  -2
   5   7   6    2157    2210   1
  12  -7  -6   18422    3122  -2
   6   7   6   18422    3122   1
  13  -7  -6    4751    2650  -2
   7   7   6    4751    2650   1
  14  -7  -6   17153    3153  -2
   8   7   6   17153    3153   1
  15  -7  -6    2971    3232  -2
   9   7   6    2971    3232   1
  16  -7  -6   68204    5413  -2
  10   7   6   68204    5413   1
  17  -7  -6    1171    3163  -2
  11   7   6    1171    3163   1
  18  -7  -6    4502    6076  -2
  12   7   6    4502    6076   1
  13   7   6     458    3473   1
  14   7   6    7723   14504   1
  15   7   6   27964    6870   1
  16   7   6     840    5088   1
  17   7   6    5555    6057   1
  18   7   6      51    5592   1
 -24   8   6   18910    5260   1
 -23   8   6   21892    6135   1
 -22   8   6   14297    5581   1
 -21   8   6   33726    6184   1
 -20   8   6    5694    5110   1
 -19   8   6   34869    5956   1
 -12  -8  -6   10330    4529  -2
 -18   8   6   10330    4529   1
 -11  -8  -6   45414    6170  -2
 -17   8   6   45414    6170   1
 -10  -8  -6   12286    4318  -2
 -16   8   6   12286    4318   1
  -9  -8  -6  129917    7768  -2
 -15   8   6  129917    7768   1
  -8  -8  -6  313446   11145  -2
 -14   8   6  313446   11145   1
  -7  -8  -6   42666    4322  -2
 -13   8   6   42666    4322   1
  -6  -8  -6  191294    6862  -2
 -12   8   6  191294    6862   1
  -5  -8  -6    -942    1781  -2
 -11   8   6    -942    1781   1
  -4  -8  -6  376897    7860  -2
 -10   8   6  376897    7860   1
  -3  -8  -6    3787    2241  -2
  -9   8   6    3787    2241   1
  -2  -8  -6  350572    8372  -2
  -8   8   6  350572    8372   1
  -1  -8  -6   11911    2090  -2
  -7   8   6   11911    2090   1
   0  -8  -6  329642    6804  -2
  -6   8   6  329642    6804   1
   1  -8  -6   36423    4310  -2
  -5   8   6   36423    4310   1
   2  -8  -6  492348    8059  -2
  -4   8   6  492348    8059   1
   3  -8  -6    2312    1591  -2
  -3   8   6    2312    1591   1
   4  -8  -6  908726   11679  -2
  -2   8   6  908726   11679   1
   5  -8  -6   26482    2466  -2
  -1   8   6   26482    2466   1
   6  -8  -6  458200    7279  -2
   0   8   6  458200    7279   1
   7  -8  -6   25512    2237  -2
   1   8   6   25512    2237   1
   8  -8  -6  511976    7591  -2
   2   8   6  511976    7591   1
   9  -8  -6    2371    1426  -2
   3   8   6    2371    1426   1
  10  -8  -6  567044    8309  -2
   4   8   6  567044    8309   1
  11  -8  -6    3626    1666  -2
   5   8   6    3626    1666   1
  12  -8  -6  435047    7747  -2
   6   8   6  435047    7747   1
  13  -8  -6   18545    3560  -2
   7   8   6   18545    3560   1
  14  -8  -6  859662   17161  -2
   8   8   6  859662   17161   1
  15  -8  -6   39975    5025  -2
   9   8   6   39975    5025   1
  16  -8  -6  235569   22711  -2
  10   8   6  235569   22711   1
  17  -8  -6    2203    3532  -2
  11   8   6    2203    3532   1
  18  -8  -6  182455   13411  -2
  12   8   6  182455   13411   1
  13   8   6   -1152    5874   1
  14   8   6   75780    9104   1
  15   8   6    -531    5061   1
  16   8   6   96417   10713   1
  17   8   6   10068    5887   1
  18   8   6  113425   11751   1
 -23   9   6    -127    4237   1
 -22   9   6  109675    9785   1
 -21   9   6    -553    3958   1
 -20   9   6  173580   16513   1
 -19   9   6     298    4199   1
 -12  -9  -6  182504   11930  -2
 -18   9   6  182504   11930   1
 -11  -9  -6   20053    5055  -2
 -17   9   6   20053    5055   1
 -10  -9  -6  277513   11788  -2
 -16   9   6  277513   11788   1
  -9  -9  -6   29543    5157  -2
 -15   9   6   29543    5157   1
  -8  -9  -6  361700   12209  -2
 -14   9   6  361700   12209   1
  -7  -9  -6    7764    2824  -2
 -13   9   6    7764    2824   1
  -6  -9  -6  460533   13034  -2
 -12   9   6  460533   13034   1
  -5  -9  -6    1267    2392  -2
 -11   9   6    1267    2392   1
  -4  -9  -6  519178    9409  -2
 -10   9   6  519178    9409   1
  -3  -9  -6    6129    2656  -2
  -9   9   6    6129    2656   1
  -2  -9  -6  382863    7581  -2
  -8   9   6  382863    7581   1
  -1  -9  -6    5742    1920  -2
  -7   9   6    5742    1920   1
   0  -9  -6  216026    5958  -2
  -6   9   6  216026    5958   1
   1  -9  -6  206116    6185  -2
  -5   9   6  206116    6185   1
   2  -9  -6  617485   10886  -2
  -4   9   6  617485   10886   1
   3  -9  -6    7237    3812  -2
  -3   9   6    7237    3812   1
   4  -9  -6  490117    9150  -2
  -2   9   6  490117    9150   1
   5  -9  -6  146169    5003  -2
  -1   9   6  146169    5003   1
   6  -9  -6  251087    6169  -2
   0   9   6  251087    6169   1
   7  -9  -6   16727    2154  -2
   1   9   6   16727    2154   1
   8  -9  -6  224111    5031  -2
   2   9   6  224111    5031   1
   9  -9  -6    7439    1735  -2
   3   9   6    7439    1735   1
  10  -9  -6  241955    6571  -2
   4   9   6  241955    6571   1
  11  -9  -6    1358    1468  -2
   5   9   6    1358    1468   1
  12  -9  -6   75534    9361  -2
   6   9   6   75534    9361   1
  13  -9  -6   34540    2421  -2
   7   9   6   34540    2421   1
  14  -9  -6   26864    3720  -2
   8   9   6   26864    3720   1
  15  -9  -6   29981    6876  -2
   9   9   6   29981    6876   1
  16  -9  -6   31126    6466  -2
  10   9   6   31126    6466   1
  17  -9  -6   48184    8235  -2
  11   9   6   48184    8235   1
  18  -9  -6   28983    6667  -2
  12   9   6   28983    6667   1
  13   9   6   11832    6484   1
  14   9   6   21467    6529   1
  15   9   6   11246    6510   1
  16   9   6    9902    6058   1
  17   9   6    6685    6715   1
 -23  10   6    5959    4960   1
 -22  10   6   10633    5162   1
 -21  10   6    -119    4307   1
 -20  10   6    1596    5531   1
 -19  10   6   18214    5328   1
 -12 -10  -6   39401    6004  -2
 -18  10   6   39401    6004   1
 -11 -10  -6   59396    7050  -2
 -17  10   6   59396    7050   1
 -10 -10  -6  125058   10545  -2
 -16  10   6  125058   10545   1
  -9 -10  -6    6777    4158  -2
 -15  10   6    6777    4158   1
  -8 -10  -6   73452    6739  -2
 -14  10   6   73452    6739   1
  -7 -10  -6    8093    4022  -2
 -13  10   6    8093    4022   1
  -6 -10  -6   -2208    3975  -2
 -12  10   6   -2208    3975   1
  -5 -10  -6    7671    2642  -2
 -11  10   6    7671    2642   1
  -4 -10  -6   66878    5207  -2
 -10  10   6   66878    5207   1
  -3 -10  -6    1573    2169  -2
  -9  10   6    1573    2169   1
  -2 -10  -6   56471    3885  -2
  -8  10   6   56471    3885   1
  -1 -10  -6   66414    3947  -2
  -7  10   6   66414    3947   1
   0 -10  -6   51876    3321  -2
  -6  10   6   51876    3321   1
   1 -10  -6   49456    3917  -2
  -5  10   6   49456    3917   1
   2 -10  -6  277866    6269  -2
  -4  10   6  277866    6269   1
   3 -10  -6   54891    4815  -2
  -3  10   6   54891    4815   1
   4 -10  -6  420853    7625  -2
  -2  10   6  420853    7625   1
   5 -10  -6   11351    2334  -2
  -1  10   6   11351    2334   1
   6 -10  -6  197453    5116  -2
   0  10   6  197453    5116   1
   7 -10  -6   17904    2227  -2
   1  10   6   17904    2227   1
   8 -10  -6  125150    4790  -2
   2  10   6  125150    4790   1
   9 -10  -6   22274    2425  -2
   3  10   6   22274    2425   1
  10 -10  -6  169908    4623  -2
   4  10   6  169908    4623   1
  11 -10  -6   33173    2561  -2
   5  10   6   33173    2561   1
  12 -10  -6   47869    3103  -2
   6  10   6   47869    3103   1
  13 -10  -6   27846    2670  -2
   7  10   6   27846    2670   1
  14 -10  -6  147052    7763  -2
   8  10   6  147052    7763   1
  15 -10  -6   49184    7896  -2
   9  10   6   49184    7896   1
  16 -10  -6  205141   14971  -2
  10  10   6  205141   14971   1
  17 -10  -6    8964    6000  -2
  11  10   6    8964    6000   1
  18 -10  -6  129790   12753  -2
  12  10   6  129790   12753   1
  13  10   6    6679    6287   1
  14  10   6   43112    8364   1
  15  10   6   21999    7543   1
  16  10   6   20875    7014   1
  17  10   6   -1120    5847   1
 -22  11   6    8484    5013   1
 -21  11   6   -4011    4330   1
 -20  11   6   -2656    4456   1
 -19  11   6   -4105    4105   1
 -12 -11  -6   32261    6120  -2
 -18  11   6   32261    6120   1
 -11 -11  -6   -4330    4773  -2
 -17  11   6   -4330    4773   1
 -10 -11  -6   13754    6424  -2
 -16  11   6   13754    6424   1
  -9 -11  -6   24627    5615  -2
 -15  11   6   24627    5615   1
  -8 -11  -6   30783    7855  -2
 -14  11   6   30783    7855   1
  -7 -11  -6  111092   10046  -2
 -13  11   6  111092   10046   1
  -6 -11  -6    4222    3965  -2
 -12  11   6    4222    3965   1
  -5 -11  -6   46630    5684  -2
 -11  11   6   46630    5684   1
  -4 -11  -6    6697    3619  -2
 -10  11   6    6697    3619   1
  -3 -11  -6    2008    3354  -2
  -9  11   6    2008    3354   1
  -2 -11  -6    8478    2939  -2
  -8  11   6    8478    2939   1
  -1 -11  -6   -1422    1834  -2
  -7  11   6   -1422    1834   1
   0 -11  -6   46180    3889  -2
  -6  11   6   46180    3889   1
   1 -11  -6   77347    4084  -2
  -5  11   6   77347    4084   1
   2 -11  -6   25480    2767  -2
  -4  11   6   25480    2767   1
   3 -11  -6   36468    3289  -2
  -3  11   6   36468    3289   1
   4 -11  -6    6245    1997  -2
  -2  11   6    6245    1997   1
   5 -11  -6  160923    6229  -2
  -1  11   6  160923    6229   1
   6 -11  -6    2914    1862  -2
   0  11   6    2914    1862   1
   7 -11  -6   14695    3044  -2
   1  11   6   14695    3044   1
   8 -11  -6    5354    2675  -2
   2  11   6    5354    2675   1
   9 -11  -6    2756    1948  -2
   3  11   6    2756    1948   1
  10 -11  -6   31868    3088  -2
   4  11   6   31868    3088   1
  11 -11  -6   10549    2301  -2
   5  11   6   10549    2301   1
  12 -11  -6   -1830    2233  -2
   6  11   6   -1830    2233   1
  13 -11  -6   46025    5319  -2
   7  11   6   46025    5319   1
  14 -11  -6   72769    5925  -2
   8  11   6   72769    5925   1
  15 -11  -6   31672    3938  -2
   9  11   6   31672    3938   1
  16 -11  -6   13370    5859  -2
  10  11   6   13370    5859   1
  17 -11  -6   -4587    4587  -2
  11  11   6   -4587    4587   1
  18 -11  -6   -1830    5809  -2
  12  11   6   -1830    5809   1
  13  11   6   -6184    6184   1
  14  11   6   18948    7390   1
  15  11   6    1915    6226   1
  16  11   6   10220    6982   1
 -21  12   6   51601    7109   1
 -20  12   6   11586    5420   1
 -19  12   6    1110    6261   1
 -12 -12  -6   45585    6334  -2
 -18  12   6   45585    6334   1
 -11 -12  -6   13996    4530  -2
 -17  12   6   13996    4530   1
 -10 -12  -6   14237    4399  -2
 -16  12   6   14237    4399   1
  -9 -12  -6   20348    6006  -2
 -15  12   6   20348    6006   1
  -8 -12  -6   15122    8591  -2
 -14  12   6   15122    8591   1
  -7 -12  -6   39615    5980  -2
 -13  12   6   39615    5980   1
  -6 -12  -6   54060    8313  -2
 -12  12   6   54060    8313   1
  -5 -12  -6    3729    3715  -2
 -11  12   6    3729    3715   1
  -4 -12  -6  149478    9683  -2
 -10  12   6  149478    9683   1
  -3 -12  -6    6833    3793  -2
  -9  12   6    6833    3793   1
  -2 -12  -6  304130   10771  -2
  -8  12   6  304130   10771   1
  -1 -12  -6     612    3141  -2
  -7  12   6     612    3141   1
   0 -12  -6  338393   11007  -2
  -6  12   6  338393   11007   1
   1 -12  -6   17731    2991  -2
  -5  12   6   17731    2991   1
   2 -12  -6  122189    7243  -2
  -4  12   6  122189    7243   1
   3 -12  -6   24483    3230  -2
  -3  12   6   24483    3230   1
   4 -12  -6  186806    6462  -2
  -2  12   6  186806    6462   1
   5 -12  -6   44400    4905  -2
  -1  12   6   44400    4905   1
   6 -12  -6  476376    9824  -2
   0  12   6  476376    9824   1
   7 -12  -6    5116    2402  -2
   1  12   6    5116    2402   1
   8 -12  -6  336597   10093  -2
   2  12   6  336597   10093   1
   9 -12  -6    2727    2286  -2
   3  12   6    2727    2286   1
  10 -12  -6  135222    5644  -2
   4  12   6  135222    5644   1
  11 -12  -6   -2081    2081  -2
   5  12   6   -2081    2081   1
  12 -12  -6  148269    8302  -2
   6  12   6  148269    8302   1
  13 -12  -6   19813    2726  -2
   7  12   6   19813    2726   1
  14 -12  -6  157293    5325  -2
   8  12   6  157293    5325   1
  15 -12  -6   45829    6416  -2
   9  12   6   45829    6416   1
  16 -12  -6  181816    9921  -2
  10  12   6  181816    9921   1
  17 -12  -6   10983    6233  -2
  11  12   6   10983    6233   1
  18 -12  -6  169464   14989  -2
  12  12   6  169464   14989   1
  13  12   6   10068    6484   1
  14  12   6   76374   10819   1
  15  12   6   11708    6558   1
 -21  13   6   14682    7520   1
 -20  13   6  146375   10804   1
 -19  13   6    -142    4727   1
 -12 -13  -6  223573   16685  -2
 -18  13   6  223573   16685   1
 -11 -13  -6    3053    4606  -2
 -17  13   6    3053    4606   1
 -10 -13  -6  317148   13707  -2
 -16  13   6  317148   13707   1
  -9 -13  -6    3670    4250  -2
 -15  13   6    3670    4250   1
  -8 -13  -6  218316   12938  -2
 -14  13   6  218316   12938   1
  -7 -13  -6    7830    4325  -2
 -13  13   6    7830    4325   1
  -6 -13  -6  156699   19927  -2
 -12  13   6  156699   19927   1
  -5 -13  -6   14628    4499  -2
 -11  13   6   14628    4499   1
  -4 -13  -6  228203   10733  -2
 -10  13   6  228203   10733   1
  -3 -13  -6   59337   11760  -2
  -9  13   6   59337   11760   1
  -2 -13  -6  380053   22395  -2
  -8  13   6  380053   22395   1
  -1 -13  -6   88056    7315  -2
  -7  13   6   88056    7315   1
   0 -13  -6  481007   13687  -2
  -6  13   6  481007   13687   1
   1 -13  -6   12893    4859  -2
  -5  13   6   12893    4859   1
   2 -13  -6  300542   10612  -2
  -4  13   6  300542   10612   1
   3 -13  -6   10803    2740  -2
  -3  13   6   10803    2740   1
   4 -13  -6  261659    9515  -2
  -2  13   6  261659    9515   1
   5 -13  -6    5649    2496  -2
  -1  13   6    5649    2496   1
   6 -13  -6  234934    7200  -2
   0  13   6  234934    7200   1
   7 -13  -6   38159    3739  -2
   1  13   6   38159    3739   1
   8 -13  -6   95791    5590  -2
   2  13   6   95791    5590   1
   9 -13  -6   30924    3545  -2
   3  13   6   30924    3545   1
  10 -13  -6  104715    5313  -2
   4  13   6  104715    5313   1
  11 -13  -6   46172    3915  -2
   5  13   6   46172    3915   1
  12 -13  -6   50174    3945  -2
   6  13   6   50174    3945   1
  13 -13  -6    4105    2455  -2
   7  13   6    4105    2455   1
  14 -13  -6   87586   10811  -2
   8  13   6   87586   10811   1
  15 -13  -6    -320    2162  -2
   9  13   6    -320    2162   1
  16 -13  -6   38361    6220  -2
  10  13   6   38361    6220   1
  17 -13  -6    6507    5943  -2
  11  13   6    6507    5943   1
  18 -13  -6   15962    6843  -2
  12  13   6   15962    6843   1
  13  13   6    8745    8663   1
  14  13   6   23376    7260   1
  15  13   6   79756   11500   1
 -20  14   6   16353    5467   1
 -19  14   6    6186    5073   1
 -12 -14  -6   67669    7778  -2
 -18  14   6   67669    7778   1
 -11 -14  -6   -1124    4246  -2
 -17  14   6   -1124    4246   1
 -10 -14  -6   36413    6138  -2
 -16  14   6   36413    6138   1
  -9 -14  -6   14150    7639  -2
 -15  14   6   14150    7639   1
  -8 -14  -6   11737    5559  -2
 -14  14   6   11737    5559   1
  -7 -14  -6    3250    4503  -2
 -13  14   6    3250    4503   1
  -6 -14  -6   36756    5718  -2
 -12  14   6   36756    5718   1
  -5 -14  -6   27500    5449  -2
 -11  14   6   27500    5449   1
  -4 -14  -6  103121    8131  -2
 -10  14   6  103121    8131   1
  -3 -14  -6   52555    6623  -2
  -9  14   6   52555    6623   1
  -2 -14  -6  242319   14274  -2
  -8  14   6  242319   14274   1
  -1 -14  -6    2577    3901  -2
  -7  14   6    2577    3901   1
   0 -14  -6  206561   11013  -2
  -6  14   6  206561   11013   1
   1 -14  -6    6215    4033  -2
  -5  14   6    6215    4033   1
   2 -14  -6  106205    8131  -2
  -4  14   6  106205    8131   1
   3 -14  -6   34468    6992  -2
  -3  14   6   34468    6992   1
   4 -14  -6  129002    9315  -2
  -2  14   6  129002    9315   1
   5 -14  -6    3091    3938  -2
  -1  14   6    3091    3938   1
   6 -14  -6  253016    9797  -2
   0  14   6  253016    9797   1
   7 -14  -6   12181    5581  -2
   1  14   6   12181    5581   1
   8 -14  -6  301250    8358  -2
   2  14   6  301250    8358   1
   9 -14  -6    4598    2623  -2
   3  14   6    4598    2623   1
  10 -14  -6  145642    9140  -2
   4  14   6  145642    9140   1
  11 -14  -6   21515    4501  -2
   5  14   6   21515    4501   1
  12 -14  -6  118772    5975  -2
   6  14   6  118772    5975   1
  13 -14  -6   25298    5509  -2
   7  14   6   25298    5509   1
  14 -14  -6  130890    5694  -2
   8  14   6  130890    5694   1
  15 -14  -6    8350    2650  -2
   9  14   6    8350    2650   1
  16 -14  -6  127846   15252  -2
  10  14   6  127846   15252   1
  17 -14  -6     967    2207  -2
  11  14   6     967    2207   1
  18 -14  -6  114967   13346  -2
  12  14   6  114967   13346   1
  13  14   6    5466    7235   1
 -19  15   6    5320    5039   1
 -12 -15  -6     295    4595  -2
 -18  15   6     295    4595   1
 -11 -15  -6   -4348    4467  -2
 -17  15   6   -4348    4467   1
 -10 -15  -6    7159    5270  -2
 -16  15   6    7159    5270   1
  -9 -15  -6   -5120    5120  -2
 -15  15   6   -5120    5120   1
  -8 -15  -6    8121    4688  -2
 -14  15   6    8121    4688   1
  -7 -15  -6    8477    4461  -2
 -13  15   6    8477    4461   1
  -6 -15  -6    -923    3794  -2
 -12  15   6    -923    3794   1
  -5 -15  -6    4880    5883  -2
 -11  15   6    4880    5883   1
  -4 -15  -6    7684    4420  -2
 -10  15   6    7684    4420   1
  -3 -15  -6   42343   10465  -2
  -9  15   6   42343   10465   1
  -2 -15  -6   37412    5783  -2
  -8  15   6   37412    5783   1
  -1 -15  -6   66721    6926  -2
  -7  15   6   66721    6926   1
   0 -15  -6   18637    4726  -2
  -6  15   6   18637    4726   1
   1 -15  -6  140227    9191  -2
  -5  15   6  140227    9191   1
   2 -15  -6   14040    5072  -2
  -4  15   6   14040    5072   1
   3 -15  -6   35479    6201  -2
  -3  15   6   35479    6201   1
   4 -15  -6   10231    4324  -2
  -2  15   6   10231    4324   1
   5 -15  -6   60018    6359  -2
  -1  15   6   60018    6359   1
   6 -15  -6    5250    3787  -2
   0  15   6    5250    3787   1
   7 -15  -6   37713    5271  -2
   1  15   6   37713    5271   1
   8 -15  -6    9639    3627  -2
   2  15   6    9639    3627   1
   9 -15  -6    4535    2620  -2
   3  15   6    4535    2620   1
  10 -15  -6    3107    3189  -2
   4  15   6    3107    3189   1
  11 -15  -6   10128    3057  -2
   5  15   6   10128    3057   1
  12 -15  -6   -1463    2469  -2
   6  15   6   -1463    2469   1
  13 -15  -6    -592    3771  -2
   7  15   6    -592    3771   1
  14 -15  -6   -2234    2475  -2
   8  15   6   -2234    2475   1
  15 -15  -6   -2450    2450  -2
   9  15   6   -2450    2450   1
  16 -15  -6    3323    2578  -2
  10  15   6    3323    2578   1
  17 -15  -6    5501    2603  -2
  11  15   6    5501    2603   1
  18 -15  -6      67    2452  -2
  12  15   6      67    2452   1
  13  15   6    2760    7958   1
 -11 -16  -6     768    4797  -2
 -17  16   6     768    4797   1
 -10 -16  -6   23613    5792  -2
 -16  16   6   23613    5792   1
  -9 -16  -6   -4174    4174  -2
 -15  16   6   -4174    4174   1
  -8 -16  -6   32887    6181  -2
 -14  16   6   32887    6181   1
  -7 -16  -6    6973    5058  -2
 -13  16   6    6973    5058   1
  -6 -16  -6   13274    8154  -2
 -12  16   6   13274    8154   1
  -5 -16  -6   -1422    4156  -2
 -11  16   6   -1422    4156   1
  -4 -16  -6   16127    5072  -2
 -10  16   6   16127    5072   1
  -3 -16  -6    -254    4228  -2
  -9  16   6    -254    4228   1
  -2 -16  -6   23799    6754  -2
  -8  16   6   23799    6754   1
  -1 -16  -6     772    4046  -2
  -7  16   6     772    4046   1
   0 -16  -6   52863    6831  -2
  -6  16   6   52863    6831   1
   1 -16  -6   -2408    3553  -2
  -5  16   6   -2408    3553   1
   2 -16  -6   92948    7732  -2
  -4  16   6   92948    7732   1
   3 -16  -6   13234    4344  -2
  -3  16   6   13234    4344   1
   4 -16  -6  138819    9071  -2
  -2  16   6  138819    9071   1
   5 -16  -6   36296    5604  -2
  -1  16   6   36296    5604   1
   6 -16  -6   53922    7818  -2
   0  16   6   53922    7818   1
   7 -16  -6    4560    3753  -2
   1  16   6    4560    3753   1
   8 -16  -6   76124    7109  -2
   2  16   6   76124    7109   1
   9 -16  -6    4095    3704  -2
   3  16   6    4095    3704   1
  10 -16  -6  112708    8369  -2
   4  16   6  112708    8369   1
  11 -16  -6   17154    3677  -2
   5  16   6   17154    3677   1
  12 -16  -6   47012    4422  -2
   6  16   6   47012    4422   1
  13 -16  -6   56121    5970  -2
   7  16   6   56121    5970   1
  14 -16  -6   78718    5407  -2
   8  16   6   78718    5407   1
  15 -16  -6   11481    4067  -2
   9  16   6   11481    4067   1
  16 -16  -6  111602   15091  -2
  10  16   6  111602   15091   1
  17 -16  -6    6379    2773  -2
  11  16   6    6379    2773   1
 -10 -17  -6  177919   12099  -2
 -16  17   6  177919   12099   1
  -9 -17  -6   10587    5370  -2
 -15  17   6   10587    5370   1
  -8 -17  -6  167849   14459  -2
 -14  17   6  167849   14459   1
  -7 -17  -6   11991    5248  -2
 -13  17   6   11991    5248   1
  -6 -17  -6   50048    8230  -2
 -12  17   6   50048    8230   1
  -5 -17  -6    3443    4974  -2
 -11  17   6    3443    4974   1
  -4 -17  -6  105333    9354  -2
 -10  17   6  105333    9354   1
  -3 -17  -6   11671    4828  -2
  -9  17   6   11671    4828   1
  -2 -17  -6  210188   21429  -2
  -8  17   6  210188   21429   1
  -1 -17  -6    5772    4752  -2
  -7  17   6    5772    4752   1
   0 -17  -6  191523   15128  -2
  -6  17   6  191523   15128   1
   1 -17  -6   22310    5303  -2
  -5  17   6   22310    5303   1
   2 -17  -6  162523   10598  -2
  -4  17   6  162523   10598   1
   3 -17  -6    7835    4153  -2
  -3  17   6    7835    4153   1
   4 -17  -6  118105   12325  -2
  -2  17   6  118105   12325   1
   5 -17  -6   18993    4863  -2
  -1  17   6   18993    4863   1
   6 -17  -6  180666   11043  -2
   0  17   6  180666   11043   1
   7 -17  -6   -3530    3530  -2
   1  17   6   -3530    3530   1
   8 -17  -6  151452   10682  -2
   2  17   6  151452   10682   1
   9 -17  -6    3851    3995  -2
   3  17   6    3851    3995   1
  10 -17  -6   21839    5166  -2
   4  17   6   21839    5166   1
  11 -17  -6    4863    4350  -2
   5  17   6    4863    4350   1
  12 -17  -6     828    5593  -2
   6  17   6     828    5593   1
  13 -17  -6   10753    4491  -2
   7  17   6   10753    4491   1
  14 -17  -6    7549    3339  -2
   8  17   6    7549    3339   1
  15 -17  -6   12681    3607  -2
   9  17   6   12681    3607   1
  16 -17  -6    5356    4698  -2
  10  17   6    5356    4698   1
  -8 -18  -6   36341    7745  -2
 -14  18   6   36341    7745   1
  -7 -18  -6   15317    5934  -2
 -13  18   6   15317    5934   1
  -6 -18  -6   90840    8546  -2
 -12  18   6   90840    8546   1
  -5 -18  -6   25351    6078  -2
 -11  18   6   25351    6078   1
  -4 -18  -6  164055   11238  -2
 -10  18   6  164055   11238   1
  -3 -18  -6    2762    4864  -2
  -9  18   6    2762    4864   1
  -2 -18  -6  136723   11807  -2
  -8  18   6  136723   11807   1
  -1 -18  -6    6884    4528  -2
  -7  18   6    6884    4528   1
   0 -18  -6   48811    6759  -2
  -6  18   6   48811    6759   1
   1 -18  -6   14534    4871  -2
  -5  18   6   14534    4871   1
   2 -18  -6   93595    8858  -2
  -4  18   6   93595    8858   1
   3 -18  -6    5558    4403  -2
  -3  18   6    5558    4403   1
   4 -18  -6   77256    7608  -2
  -2  18   6   77256    7608   1
   5 -18  -6    4810    4281  -2
  -1  18   6    4810    4281   1
   6 -18  -6  136478    9832  -2
   0  18   6  136478    9832   1
   7 -18  -6   14367    4915  -2
   1  18   6   14367    4915   1
   8 -18  -6  197787   19251  -2
   2  18   6  197787   19251   1
   9 -18  -6   14023    6697  -2
   3  18   6   14023    6697   1
  10 -18  -6  171593   10983  -2
   4  18   6  171593   10983   1
  11 -18  -6    -137    3966  -2
   5  18   6    -137    3966   1
  12 -18  -6  180665   10757  -2
   6  18   6  180665   10757   1
  13 -18  -6    4226    4309  -2
   7  18   6    4226    4309   1
  14 -18  -6   93403    8700  -2
   8  18   6   93403    8700   1
  -6 -19  -6    9892    5325  -2
 -12  19   6    9892    5325   1
  -5 -19  -6   10475    5831  -2
 -11  19   6   10475    5831   1
  -4 -19  -6    6877    6943  -2
 -10  19   6    6877    6943   1
  -3 -19  -6   28256    7850  -2
  -9  19   6   28256    7850   1
  -2 -19  -6    8098    7118  -2
  -8  19   6    8098    7118   1
  -1 -19  -6   13914   10927  -2
  -7  19   6   13914   10927   1
   0 -19  -6   22477    7155  -2
  -6  19   6   22477    7155   1
   1 -19  -6    3674    5452  -2
  -5  19   6    3674    5452   1
   2 -19  -6   16420    6058  -2
  -4  19   6   16420    6058   1
   3 -19  -6   15146    5288  -2
  -3  19   6   15146    5288   1
   4 -19  -6    4343    4408  -2
  -2  19   6    4343    4408   1
   5 -19  -6    2444    4131  -2
  -1  19   6    2444    4131   1
   6 -19  -6    2707    4644  -2
   0  19   6    2707    4644   1
   7 -19  -6    3609    4319  -2
   1  19   6    3609    4319   1
   8 -19  -6   11367    4732  -2
   2  19   6   11367    4732   1
   9 -19  -6   -4242    4242  -2
   3  19   6   -4242    4242   1
  10 -19  -6    -436    4042  -2
   4  19   6    -436    4042   1
  11 -19  -6     302    5049  -2
   5  19   6     302    5049   1
  12 -19  -6    2121    4248  -2
   6  19   6    2121    4248   1
  -4 -20  -6   -2089    4765  -2
 -10  20   6   -2089    4765   1
  -3 -20  -6    -532    5327  -2
  -9  20   6    -532    5327   1
  -2 -20  -6    -837    4786  -2
  -8  20   6    -837    4786   1
  -1 -20  -6    2930    4968  -2
  -7  20   6    2930    4968   1
   0 -20  -6   57358    9931  -2
  -6  20   6   57358    9931   1
   1 -20  -6    5320    4851  -2
  -5  20   6    5320    4851   1
   2 -20  -6   36093   16269  -2
  -4  20   6   36093   16269   1
   3 -20  -6     139    4743  -2
  -3  20   6     139    4743   1
   4 -20  -6   24490    5802  -2
  -2  20   6   24490    5802   1
   5 -20  -6    2597    4429  -2
  -1  20   6    2597    4429   1
   6 -20  -6    3127    4662  -2
   0  20   6    3127    4662   1
   7 -20  -6   16203    5612  -2
   1  20   6   16203    5612   1
   8 -20  -6   18682    5463  -2
   2  20   6   18682    5463   1
   9 -20  -6   41969    6856  -2
   3  20   6   41969    6856   1
  10 -20  -6   32543    6304  -2
   4  20   6   32543    6304   1
   2 -21  -6   67065    8243  -2
  -4  21   6   67065    8243   1
   3 -21  -6   13383    5332  -2
  -3  21   6   13383    5332   1
   4 -21  -6   40712    6978  -2
  -2  21   6   40712    6978   1
 -26   1   7   51589   10757   1
 -25   1   7    4499    5120   1
 -24   1   7   71450   14012   1
 -23   1   7    1516    4819   1
 -22   1   7    5010    4932   1
 -21   1   7   34051    6020   1
 -20   1   7   11832    7714   1
 -12  -1  -7   83220    7583  -2
 -19   1   7   83220    7583   1
 -11  -1  -7    5930    4321  -2
 -18   1   7    5930    4321   1
 -10  -1  -7  166512   14506  -2
 -17   1   7  166512   14506   1
  -9  -1  -7    4384    2511  -2
 -16   1   7    4384    2511   1
  -8  -1  -7   31904    3109  -2
 -15   1   7   31904    3109   1
  -7  -1  -7   25338    3052  -2
 -14   1   7   25338    3052   1
  -6  -1  -7   30477    3267  -2
 -13   1   7   30477    3267   1
  -5  -1  -7    6286    2573  -2
 -12   1   7    6286    2573   1
  -4  -1  -7   34046    2799  -2
 -11   1   7   34046    2799   1
  -3  -1  -7   59465    3625  -2
 -10   1   7   59465    3625   1
  -2  -1  -7    1961    1842  -2
  -9   1   7    1961    1842   1
  -1  -1  -7   62899    3413  -2
  -8   1   7   62899    3413   1
   0  -1  -7   55590    3104  -2
  -7   1   7   55590    3104   1
   1  -1  -7  108833    3914  -2
  -6   1   7  108833    3914   1
   2  -1  -7  138827    4313  -2
  -5   1   7  138827    4313   1
   3  -1  -7  163284    4491  -2
  -4   1   7  163284    4491   1
   4  -1  -7   40550    3338  -2
  -3   1   7   40550    3338   1
   5  -1  -7  277370    4875  -2
  -2   1   7  277370    4875   1
   6  -1  -7   33984    1974  -2
  -1   1   7   33984    1974   1
   7  -1  -7   50324    2524  -2
   0   1   7   50324    2524   1
   8  -1  -7   28674    1682  -2
   1   1   7   28674    1682   1
   9  -1  -7   15372    1381  -2
   2   1   7   15372    1381   1
  10  -1  -7   13757    1420  -2
   3   1   7   13757    1420   1
  11  -1  -7  150781    4270  -2
   4   1   7  150781    4270   1
  12  -1  -7    1440    1451  -2
   5   1   7    1440    1451   1
  13  -1  -7  204664    5049  -2
   6   1   7  204664    5049   1
  14  -1  -7   10736    1933  -2
   7   1   7   10736    1933   1
  15  -1  -7  151330    4482  -2
   8   1   7  151330    4482   1
  16  -1  -7   45695    4878  -2
   9   1   7   45695    4878   1
  17  -1  -7  182271   13419  -2
  10   1   7  182271   13419   1
  18  -1  -7    9812    2658  -2
  11   1   7    9812    2658   1
  19  -1  -7  162802    7329  -2
  12   1   7  162802    7329   1
 -25   2   7   19248    6103   1
 -24   2   7  101962   11787   1
 -23   2   7    1713    4995   1
 -22   2   7  251618   13394   1
 -21   2   7    9735    4850   1
 -20   2   7  286442   13793   1
 -12  -2  -7   16846    6480  -2
 -19   2   7   16846    6480   1
 -11  -2  -7  283133   11410  -2
 -18   2   7  283133   11410   1
 -10  -2  -7   16337    4069  -2
 -17   2   7   16337    4069   1
  -9  -2  -7  287728    8375  -2
 -16   2   7  287728    8375   1
  -8  -2  -7   60082    5375  -2
 -15   2   7   60082    5375   1
  -7  -2  -7  889585   13138  -2
 -14   2   7  889585   13138   1
  -6  -2  -7  116222    4997  -2
 -13   2   7  116222    4997   1
  -5  -2  -7 1342097   16853  -2
 -12   2   7 1342097   16853   1
  -4  -2  -7  231996    9663  -2
 -11   2   7  231996    9663   1
  -3  -2  -7 1897563   21245  -2
 -10   2   7 1897563   21245   1
  -1  -2  -7 1133220   13977  -2
  -8   2   7 1133220   13977   1
   0  -2  -7  195931    4877  -2
  -7   2   7  195931    4877   1
   1  -2  -7 1193082   13991  -2
  -6   2   7 1193082   13991   1
   2  -2  -7  231986    4921  -2
  -5   2   7  231986    4921   1
   3  -2  -7 1569338   16782  -2
  -4   2   7 1569338   16782   1
   5  -2  -7 1266841   15831  -2
  -2   2   7 1266841   15831   1
   6  -2  -7  266318    4543  -2
  -1   2   7  266318    4543   1
   7  -2  -7  878055    9834  -2
   0   2   7  878055    9834   1
   8  -2  -7  212515    4404  -2
   1   2   7  212515    4404   1
   9  -2  -7 1703807   16482  -2
   2   2   7 1703807   16482   1
  11  -2  -7 1207821   17980  -2
   4   2   7 1207821   17980   1
  12  -2  -7  226098   11161  -2
   5   2   7  226098   11161   1
  13  -2  -7  758720   12514  -2
   6   2   7  758720   12514   1
  14  -2  -7  254714   12956  -2
   7   2   7  254714   12956   1
  15  -2  -7  134003    4792  -2
   8   2   7  134003    4792   1
  16  -2  -7   19812    2277  -2
   9   2   7   19812    2277   1
  17  -2  -7  156921    5430  -2
  10   2   7  156921    5430   1
  18  -2  -7  189681    5988  -2
  11   2   7  189681    5988   1
  19  -2  -7  194285    6242  -2
  12   2   7  194285    6242   1
  13   2   7   50065    4851   1
  14   2   7  140884    5627   1
  15   2   7   35503    3293   1
  16   2   7   41816    4620   1
  17   2   7    4286    3399   1
 -25   3   7   25374    6185   1
 -24   3   7    5775    6005   1
 -23   3   7    7661    5141   1
 -22   3   7   71398    7734   1
 -21   3   7   34837    5780   1
 -20   3   7   79755    8022   1
 -12  -3  -7   89291   15816  -2
 -19   3   7   89291   15816   1
 -11  -3  -7   81533    7732  -2
 -18   3   7   81533    7732   1
 -10  -3  -7  119891    8418  -2
 -17   3   7  119891    8418   1
  -9  -3  -7   16760    3835  -2
 -16   3   7   16760    3835   1
  -8  -3  -7   32409    3023  -2
 -15   3   7   32409    3023   1
  -7  -3  -7   19103    2890  -2
 -14   3   7   19103    2890   1
  -6  -3  -7   65034    9141  -2
 -13   3   7   65034    9141   1
  -5  -3  -7      34    2334  -2
 -12   3   7      34    2334   1
  -4  -3  -7  126229    4855  -2
 -11   3   7  126229    4855   1
  -3  -3  -7    3629    1955  -2
 -10   3   7    3629    1955   1
  -2  -3  -7  280971    7764  -2
  -9   3   7  280971    7764   1
  -1  -3  -7   60348    3347  -2
  -8   3   7   60348    3347   1
   0  -3  -7   17236    2197  -2
  -7   3   7   17236    2197   1
   1  -3  -7   47915    2888  -2
  -6   3   7   47915    2888   1
   2  -3  -7   10334    1811  -2
  -5   3   7   10334    1811   1
   3  -3  -7  190874    4430  -2
  -4   3   7  190874    4430   1
   4  -3  -7   40578    2957  -2
  -3   3   7   40578    2957   1
   5  -3  -7   63328    2810  -2
  -2   3   7   63328    2810   1
   6  -3  -7   30703    2066  -2
  -1   3   7   30703    2066   1
   7  -3  -7   33263    2001  -2
   0   3   7   33263    2001   1
   8  -3  -7   84760    4365  -2
   1   3   7   84760    4365   1
   9  -3  -7  304049    4382  -2
   2   3   7  304049    4382   1
  10  -3  -7   31105    2948  -2
   3   3   7   31105    2948   1
  11  -3  -7  430081    8850  -2
   4   3   7  430081    8850   1
  12  -3  -7     946    1913  -2
   5   3   7     946    1913   1
  13  -3  -7  399881    8544  -2
   6   3   7  399881    8544   1
  14  -3  -7   34169    3072  -2
   7   3   7   34169    3072   1
  15  -3  -7  247730   11026  -2
   8   3   7  247730   11026   1
  16  -3  -7    5386    2305  -2
   9   3   7    5386    2305   1
  17  -3  -7   32263    3764  -2
  10   3   7   32263    3764   1
  18  -3  -7    4557    2411  -2
  11   3   7    4557    2411   1
  19  -3  -7  150312    6147  -2
  12   3   7  150312    6147   1
  13   3   7    4061    2699   1
  14   3   7  177570    6791   1
  15   3   7    6274    2893   1
  16   3   7   81551    5234   1
  17   3   7    9740    3049   1
  18   3   7    3118    2192   1
 -25   4   7    5484    6777   1
 -24   4   7   12397    5603   1
 -23   4   7   39077    6666   1
 -22   4   7   21439    5872   1
 -21   4   7   38701    6312   1
 -20   4   7   32027    5813   1
 -12  -4  -7    7470    4440  -2
 -19   4   7    7470    4440   1
 -11  -4  -7   11149    5004  -2
 -18   4   7   11149    5004   1
 -10  -4  -7   -3591    3591  -2
 -17   4   7   -3591    3591   1
  -9  -4  -7    5533    2873  -2
 -16   4   7    5533    2873   1
  -8  -4  -7   82775    5525  -2
 -15   4   7   82775    5525   1
  -7  -4  -7  117682    7437  -2
 -14   4   7  117682    7437   1
  -6  -4  -7    3135    2264  -2
 -13   4   7    3135    2264   1
  -5  -4  -7   57388    3676  -2
 -12   4   7   57388    3676   1
  -4  -4  -7   17869    2458  -2
 -11   4   7   17869    2458   1
  -3  -4  -7  182497    6109  -2
 -10   4   7  182497    6109   1
  -2  -4  -7   41716    2967  -2
  -9   4   7   41716    2967   1
  -1  -4  -7   22083    2562  -2
  -8   4   7   22083    2562   1
   0  -4  -7   15873    2202  -2
  -7   4   7   15873    2202   1
   1  -4  -7   12364    1948  -2
  -6   4   7   12364    1948   1
   2  -4  -7   56870    3122  -2
  -5   4   7   56870    3122   1
   3  -4  -7   23850    2162  -2
  -4   4   7   23850    2162   1
   4  -4  -7   51435    2776  -2
  -3   4   7   51435    2776   1
   5  -4  -7   22323    2011  -2
  -2   4   7   22323    2011   1
   6  -4  -7   95786    4044  -2
  -1   4   7   95786    4044   1
   7  -4  -7   12158    1560  -2
   0   4   7   12158    1560   1
   8  -4  -7    6718    1327  -2
   1   4   7    6718    1327   1
   9  -4  -7  192421    4284  -2
   2   4   7  192421    4284   1
  10  -4  -7  108034    4889  -2
   3   4   7  108034    4889   1
  11  -4  -7  100020    5022  -2
   4   4   7  100020    5022   1
  12  -4  -7   30769    3035  -2
   5   4   7   30769    3035   1
  13  -4  -7   25171    3015  -2
   6   4   7   25171    3015   1
  14  -4  -7   20203    3369  -2
   7   4   7   20203    3369   1
  15  -4  -7    8518    2831  -2
   8   4   7    8518    2831   1
  16  -4  -7   72383    7517  -2
   9   4   7   72383    7517   1
  17  -4  -7    9497    3589  -2
  10   4   7    9497    3589   1
  18  -4  -7   14608    3357  -2
  11   4   7   14608    3357   1
  19  -4  -7  106105    6059  -2
  12   4   7  106105    6059   1
  13   4   7   -2643    2643   1
  14   4   7   41809    4323   1
  15   4   7    3859    3530   1
  16   4   7    4098    3114   1
  17   4   7    9334    3478   1
  18   4   7   10265    5863   1
 -25   5   7   23834   12628   1
 -24   5   7   59678   12589   1
 -23   5   7   44978    6615   1
 -22   5   7    4224    4852   1
 -21   5   7   26518    5444   1
 -20   5   7   -3973    3973   1
 -12  -5  -7   10856    9957  -2
 -19   5   7   10856    9957   1
 -11  -5  -7    -144    4189  -2
 -18   5   7    -144    4189   1
 -10  -5  -7    4473    4097  -2
 -17   5   7    4473    4097   1
  -9  -5  -7   23569    3969  -2
 -16   5   7   23569    3969   1
  -8  -5  -7   10899    3927  -2
 -15   5   7   10899    3927   1
  -7  -5  -7   16177    2768  -2
 -14   5   7   16177    2768   1
  -6  -5  -7   24346    3221  -2
 -13   5   7   24346    3221   1
  -5  -5  -7   17850    3238  -2
 -12   5   7   17850    3238   1
  -4  -5  -7    8878    2199  -2
 -11   5   7    8878    2199   1
  -3  -5  -7   55738    3655  -2
 -10   5   7   55738    3655   1
  -2  -5  -7   38294    3383  -2
  -9   5   7   38294    3383   1
  -1  -5  -7   85285    5498  -2
  -8   5   7   85285    5498   1
   0  -5  -7   52186    3257  -2
  -7   5   7   52186    3257   1
   1  -5  -7   14821    2399  -2
  -6   5   7   14821    2399   1
   2  -5  -7   11483    1894  -2
  -5   5   7   11483    1894   1
   3  -5  -7   11850    1920  -2
  -4   5   7   11850    1920   1
   4  -5  -7    3419    1551  -2
  -3   5   7    3419    1551   1
   5  -5  -7  104773    3741  -2
  -2   5   7  104773    3741   1
   6  -5  -7   17387    1889  -2
  -1   5   7   17387    1889   1
   7  -5  -7  144889    4715  -2
   0   5   7  144889    4715   1
   8  -5  -7    6878    1806  -2
   1   5   7    6878    1806   1
   9  -5  -7  196022    4156  -2
   2   5   7  196022    4156   1
  10  -5  -7    4241    2247  -2
   3   5   7    4241    2247   1
  11  -5  -7  110797    5528  -2
   4   5   7  110797    5528   1
  12  -5  -7    5029    2307  -2
   5   5   7    5029    2307   1
  13  -5  -7  105735    5453  -2
   6   5   7  105735    5453   1
  14  -5  -7   50516    4167  -2
   7   5   7   50516    4167   1
  15  -5  -7   83043   12318  -2
   8   5   7   83043   12318   1
  16  -5  -7    5610    2867  -2
   9   5   7    5610    2867   1
  17  -5  -7  106283    6155  -2
  10   5   7  106283    6155   1
  18  -5  -7    5990    3401  -2
  11   5   7    5990    3401   1
  19  -5  -7   37302    4445  -2
  12   5   7   37302    4445   1
  13   5   7     655    2940   1
  14   5   7   38321    5352   1
  15   5   7   -2041    3278   1
  16   5   7   22134    3950   1
  17   5   7    6203    3513   1
  18   5   7   15815    4097   1
 -25   6   7     597    5209   1
 -24   6   7   51463    7670   1
 -23   6   7   14628    6254   1
 -22   6   7  137959   10023   1
 -21   6   7    6452    4424   1
 -20   6   7  301305   14219   1
 -12  -6  -7    9729    4765  -2
 -19   6   7    9729    4765   1
 -11  -6  -7  321180   12275  -2
 -18   6   7  321180   12275   1
 -10  -6  -7   34458    5409  -2
 -17   6   7   34458    5409   1
  -9  -6  -7  271646   10853  -2
 -16   6   7  271646   10853   1
  -8  -6  -7   51947    4277  -2
 -15   6   7   51947    4277   1
  -7  -6  -7  428005   11046  -2
 -14   6   7  428005   11046   1
  -6  -6  -7   57053    5482  -2
 -13   6   7   57053    5482   1
  -5  -6  -7  731577   12111  -2
 -12   6   7  731577   12111   1
  -4  -6  -7   80680    4457  -2
 -11   6   7   80680    4457   1
  -3  -6  -7  855515   14272  -2
 -10   6   7  855515   14272   1
  -2  -6  -7   59119    3232  -2
  -9   6   7   59119    3232   1
  -1  -6  -7 1247038   15505  -2
  -8   6   7 1247038   15505   1
   0  -6  -7  221788    5498  -2
  -7   6   7  221788    5498   1
   1  -6  -7 1072780   13547  -2
  -6   6   7 1072780   13547   1
   2  -6  -7  151114    4516  -2
  -5   6   7  151114    4516   1
   3  -6  -7 1282361   15039  -2
  -4   6   7 1282361   15039   1
   4  -6  -7  223209    5774  -2
  -3   6   7  223209    5774   1
   5  -6  -7  894479   11232  -2
  -2   6   7  894479   11232   1
   6  -6  -7  273416    5280  -2
  -1   6   7  273416    5280   1
   7  -6  -7  673430   10591  -2
   0   6   7  673430   10591   1
   8  -6  -7  367175   30336  -2
   1   6   7  367175   30336   1
   9  -6  -7  481207    6748  -2
   2   6   7  481207    6748   1
  10  -6  -7  134928    7993  -2
   3   6   7  134928    7993   1
  11  -6  -7  557976   11899  -2
   4   6   7  557976   11899   1
  13  -6  -7  467126   10816  -2
   6   6   7  467126   10816   1
  14  -6  -7   52945    4539  -2
   7   6   7   52945    4539   1
  15  -6  -7  408828   10309  -2
   8   6   7  408828   10309   1
  16  -6  -7   54906    4570  -2
   9   6   7   54906    4570   1
  17  -6  -7  217477    8170  -2
  10   6   7  217477    8170   1
  18  -6  -7   26307    6788  -2
  11   6   7   26307    6788   1
  19  -6  -7   54605    6546  -2
  12   6   7   54605    6546   1
  13   6   7   12798    3379   1
  14   6   7   26894    4302   1
  15   6   7    4136    4715   1
  16   6   7   13747    4380   1
  17   6   7   -3344    9480   1
  18   6   7   15755    6310   1
 -24   7   7   21002    6956   1
 -23   7   7   13787    5328   1
 -22   7   7   15711    5359   1
 -21   7   7   97978    8573   1
 -20   7   7    7769    4571   1
 -12  -7  -7   55673    7206  -2
 -19   7   7   55673    7206   1
 -11  -7  -7   18217    5130  -2
 -18   7   7   18217    5130   1
 -10  -7  -7   37772    5870  -2
 -17   7   7   37772    5870   1
  -9  -7  -7   79883    7281  -2
 -16   7   7   79883    7281   1
  -8  -7  -7    7741    4079  -2
 -15   7   7    7741    4079   1
  -7  -7  -7   47493    4500  -2
 -14   7   7   47493    4500   1
  -6  -7  -7   19149    3463  -2
 -13   7   7   19149    3463   1
  -5  -7  -7   25877    2970  -2
 -12   7   7   25877    2970   1
  -4  -7  -7  188366    8105  -2
 -11   7   7  188366    8105   1
  -3  -7  -7   98173    4610  -2
 -10   7   7   98173    4610   1
  -2  -7  -7  127337    6899  -2
  -9   7   7  127337    6899   1
  -1  -7  -7  217023    5675  -2
  -8   7   7  217023    5675   1
   0  -7  -7   72924    4742  -2
  -7   7   7   72924    4742   1
   1  -7  -7   29609    4018  -2
  -6   7   7   29609    4018   1
   2  -7  -7   25930    2482  -2
  -5   7   7   25930    2482   1
   3  -7  -7   10527    1870  -2
  -4   7   7   10527    1870   1
   4  -7  -7   75047    3528  -2
  -3   7   7   75047    3528   1
   5  -7  -7   19931    3402  -2
  -2   7   7   19931    3402   1
   6  -7  -7   34784    3609  -2
  -1   7   7   34784    3609   1
   7  -7  -7  278813    5379  -2
   0   7   7  278813    5379   1
   8  -7  -7   65661    2872  -2
   1   7   7   65661    2872   1
   9  -7  -7  513386    8961  -2
   2   7   7  513386    8961   1
  10  -7  -7   68701    2769  -2
   3   7   7   68701    2769   1
  11  -7  -7  299312    5215  -2
   4   7   7  299312    5215   1
  12  -7  -7   -2478    2478  -2
   5   7   7   -2478    2478   1
  13  -7  -7  126383    6569  -2
   6   7   7  126383    6569   1
  14  -7  -7   37951    4433  -2
   7   7   7   37951    4433   1
  15  -7  -7   63910    6106  -2
   8   7   7   63910    6106   1
  16  -7  -7   10352    3335  -2
   9   7   7   10352    3335   1
  17  -7  -7   31316    4665  -2
  10   7   7   31316    4665   1
  18  -7  -7   48313    5370  -2
  11   7   7   48313    5370   1
  19  -7  -7  140569   11062  -2
  12   7   7  140569   11062   1
  13   7   7    9697    3773   1
  14   7   7  194402   12768   1
  15   7   7    1883    5825   1
  16   7   7  122639   23022   1
  17   7   7   -1785    4706   1
 -24   8   7    5587    5325   1
 -23   8   7   -2309    9545   1
 -22   8   7  136041   10264   1
 -21   8   7    6184    4532   1
 -20   8   7  187261   11254   1
 -12  -8  -7   28572    6566  -2
 -19   8   7   28572    6566   1
 -11  -8  -7   68077    7586  -2
 -18   8   7   68077    7586   1
 -10  -8  -7   -3845    3845  -2
 -17   8   7   -3845    3845   1
  -9  -8  -7     338    4193  -2
 -16   8   7     338    4193   1
  -8  -8  -7    6031    4098  -2
 -15   8   7    6031    4098   1
  -7  -8  -7   34494    6435  -2
 -14   8   7   34494    6435   1
  -6  -8  -7   11209    2847  -2
 -13   8   7   11209    2847   1
  -5  -8  -7   72825    5620  -2
 -12   8   7   72825    5620   1
  -4  -8  -7   25188    3578  -2
 -11   8   7   25188    3578   1
  -3  -8  -7  146037    6602  -2
 -10   8   7  146037    6602   1
  -2  -8  -7    2000    1878  -2
  -9   8   7    2000    1878   1
  -1  -8  -7   55139    3502  -2
  -8   8   7   55139    3502   1
   0  -8  -7   43264    3394  -2
  -7   8   7   43264    3394   1
   1  -8  -7   73372    4155  -2
  -6   8   7   73372    4155   1
   2  -8  -7  135622    4759  -2
  -5   8   7  135622    4759   1
   3  -8  -7  495882    9745  -2
  -4   8   7  495882    9745   1
   4  -8  -7   77105    4053  -2
  -3   8   7   77105    4053   1
   5  -8  -7  291598    5958  -2
  -2   8   7  291598    5958   1
   6  -8  -7   14496    2021  -2
  -1   8   7   14496    2021   1
   7  -8  -7   13421    2251  -2
   0   8   7   13421    2251   1
   8  -8  -7   60060    3018  -2
   1   8   7   60060    3018   1
   9  -8  -7   32913    3184  -2
   2   8   7   32913    3184   1
  10  -8  -7  122636    6342  -2
   3   8   7  122636    6342   1
  11  -8  -7  138422    8410  -2
   4   8   7  138422    8410   1
  12  -8  -7   37564    4171  -2
   5   8   7   37564    4171   1
  13  -8  -7   82683    5862  -2
   6   8   7   82683    5862   1
  14  -8  -7   25812    5430  -2
   7   8   7   25812    5430   1
  15  -8  -7   45595    5736  -2
   8   8   7   45595    5736   1
  16  -8  -7   14859    5689  -2
   9   8   7   14859    5689   1
  17  -8  -7     333    3313  -2
  10   8   7     333    3313   1
  18  -8  -7   57108    8031  -2
  11   8   7   57108    8031   1
  19  -8  -7    -778    4915  -2
  12   8   7    -778    4915   1
  13   8   7   19639    6786   1
  14   8   7     638    5487   1
  15   8   7    9192    5987   1
  16   8   7    5060    6967   1
  17   8   7     702    5423   1
 -23   9   7   11273    5398   1
 -22   9   7    9423    6439   1
 -21   9   7    2025    4673   1
 -20   9   7   71163    8563   1
 -12  -9  -7   -3269    3986  -2
 -19   9   7   -3269    3986   1
 -11  -9  -7   66361   13166  -2
 -18   9   7   66361   13166   1
 -10  -9  -7    1775    6005  -2
 -17   9   7    1775    6005   1
  -9  -9  -7   91166    7668  -2
 -16   9   7   91166    7668   1
  -8  -9  -7   59288    6480  -2
 -15   9   7   59288    6480   1
  -7  -9  -7   54634    6241  -2
 -14   9   7   54634    6241   1
  -6  -9  -7    8336    4031  -2
 -13   9   7    8336    4031   1
  -5  -9  -7    9104    3026  -2
 -12   9   7    9104    3026   1
  -4  -9  -7    9462    2775  -2
 -11   9   7    9462    2775   1
  -3  -9  -7    6383    2313  -2
 -10   9   7    6383    2313   1
  -2  -9  -7   13009    2665  -2
  -9   9   7   13009    2665   1
  -1  -9  -7   38897    6965  -2
  -8   9   7   38897    6965   1
   0  -9  -7     -13    1802  -2
  -7   9   7     -13    1802   1
   1  -9  -7    9660    2371  -2
  -6   9   7    9660    2371   1
   2  -9  -7   16404    2253  -2
  -5   9   7   16404    2253   1
   3  -9  -7    3791    1771  -2
  -4   9   7    3791    1771   1
   4  -9  -7   20854    2341  -2
  -3   9   7   20854    2341   1
   5  -9  -7   86510    3933  -2
  -2   9   7   86510    3933   1
   6  -9  -7    2815    1920  -2
  -1   9   7    2815    1920   1
   7  -9  -7   11461    1969  -2
   0   9   7   11461    1969   1
   8  -9  -7   23603    2955  -2
   1   9   7   23603    2955   1
   9  -9  -7   36084    2635  -2
   2   9   7   36084    2635   1
  10  -9  -7    1456    1759  -2
   3   9   7    1456    1759   1
  11  -9  -7   37203    2599  -2
   4   9   7   37203    2599   1
  12  -9  -7      69    1738  -2
   5   9   7      69    1738   1
  13  -9  -7  123961    4802  -2
   6   9   7  123961    4802   1
  14  -9  -7   53790    5045  -2
   7   9   7   53790    5045   1
  15  -9  -7  135347   11148  -2
   8   9   7  135347   11148   1
  17  -9  -7   19803    8124  -2
  10   9   7   19803    8124   1
  18  -9  -7   10216    5703  -2
  11   9   7   10216    5703   1
  19  -9  -7   -3057    5352  -2
  12   9   7   -3057    5352   1
  13   9   7   14196    6182   1
  14   9   7    7377    6105   1
  15   9   7   39132    8290   1
  16   9   7    7224    5926   1
 -23  10   7   12206    5699   1
 -22  10   7   21305    5755   1
 -21  10   7   20758    6510   1
 -20  10   7  118298    9651   1
 -12 -10  -7   25066    6019  -2
 -19  10   7   25066    6019   1
 -11 -10  -7  166306   10860  -2
 -18  10   7  166306   10860   1
 -10 -10  -7   26535    5227  -2
 -17  10   7   26535    5227   1
  -9 -10  -7  409736   17019  -2
 -16  10   7  409736   17019   1
  -8 -10  -7   63674   12706  -2
 -15  10   7   63674   12706   1
  -7 -10  -7  383660   13147  -2
 -14  10   7  383660   13147   1
  -6 -10  -7   41575    5504  -2
 -13  10   7   41575    5504   1
  -5 -10  -7  255963   11657  -2
 -12  10   7  255963   11657   1
  -4 -10  -7   22681    4331  -2
 -11  10   7   22681    4331   1
  -3 -10  -7  439701   12831  -2
 -10  10   7  439701   12831   1
  -2 -10  -7   65864    9349  -2
  -9  10   7   65864    9349   1
  -1 -10  -7  648344   10673  -2
  -8  10   7  648344   10673   1
   0 -10  -7   50049    3424  -2
  -7  10   7   50049    3424   1
   1 -10  -7  522269   15366  -2
  -6  10   7  522269   15366   1
   2 -10  -7   98031    4761  -2
  -5  10   7   98031    4761   1
   3 -10  -7  501584   10073  -2
  -4  10   7  501584   10073   1
   4 -10  -7   63483    7542  -2
  -3  10   7   63483    7542   1
   5 -10  -7  445466    9166  -2
  -2  10   7  445466    9166   1
   6 -10  -7   94926    7207  -2
  -1  10   7   94926    7207   1
   7 -10  -7  501438    8650  -2
   0  10   7  501438    8650   1
   8 -10  -7  107596   11143  -2
   1  10   7  107596   11143   1
   9 -10  -7  567084    8833  -2
   2  10   7  567084    8833   1
  10 -10  -7   78697    7027  -2
   3  10   7   78697    7027   1
  11 -10  -7  177510    5161  -2
   4  10   7  177510    5161   1
  12 -10  -7   23417    3094  -2
   5  10   7   23417    3094   1
  13 -10  -7  152111    5262  -2
   6  10   7  152111    5262   1
  14 -10  -7   44349    3668  -2
   7  10   7   44349    3668   1
  15 -10  -7  309177   14754  -2
   8  10   7  309177   14754   1
  17 -10  -7  146959   16707  -2
  10  10   7  146959   16707   1
  18 -10  -7    4278    5113  -2
  11  10   7    4278    5113   1
  19 -10  -7  185295   15066  -2
  12  10   7  185295   15066   1
  13  10   7    1420    5817   1
  14  10   7   69043   10049   1
  15  10   7   22353    7814   1
  16  10   7   15423    7095   1
 -22  11   7   17197    5650   1
 -21  11   7   11760    5178   1
 -20  11   7    9372    6309   1
 -12 -11  -7   39136    6370  -2
 -19  11   7   39136    6370   1
 -11 -11  -7   16371    5221  -2
 -18  11   7   16371    5221   1
 -10 -11  -7   52952    6736  -2
 -17  11   7   52952    6736   1
  -9 -11  -7   17252    5130  -2
 -16  11   7   17252    5130   1
  -8 -11  -7   64896    8101  -2
 -15  11   7   64896    8101   1
  -7 -11  -7   27727    5711  -2
 -14  11   7   27727    5711   1
  -6 -11  -7   27012    5100  -2
 -13  11   7   27012    5100   1
  -5 -11  -7   76015    7271  -2
 -12  11   7   76015    7271   1
  -4 -11  -7   54034    6008  -2
 -11  11   7   54034    6008   1
  -3 -11  -7    3098    4334  -2
 -10  11   7    3098    4334   1
  -2 -11  -7   18923    4189  -2
  -9  11   7   18923    4189   1
  -1 -11  -7    4914    3395  -2
  -8  11   7    4914    3395   1
   0 -11  -7   33243    3778  -2
  -7  11   7   33243    3778   1
   1 -11  -7   18680    3121  -2
  -6  11   7   18680    3121   1
   2 -11  -7   36555    3420  -2
  -5  11   7   36555    3420   1
   3 -11  -7   23230    3045  -2
  -4  11   7   23230    3045   1
   4 -11  -7    3980    3839  -2
  -3  11   7    3980    3839   1
   5 -11  -7  163891    6411  -2
  -2  11   7  163891    6411   1
   6 -11  -7    4565    2295  -2
  -1  11   7    4565    2295   1
   7 -11  -7   69082    4336  -2
   0  11   7   69082    4336   1
   8 -11  -7    -458    1974  -2
   1  11   7    -458    1974   1
   9 -11  -7   30312    3108  -2
   2  11   7   30312    3108   1
  10 -11  -7   -1867    1867  -2
   3  11   7   -1867    1867   1
  11 -11  -7   34879    5507  -2
   4  11   7   34879    5507   1
  12 -11  -7   11358    2308  -2
   5  11   7   11358    2308   1
  13 -11  -7  159896    5160  -2
   6  11   7  159896    5160   1
  14 -11  -7   12339    2979  -2
   7  11   7   12339    2979   1
  15 -11  -7  247035   25436  -2
   8  11   7  247035   25436   1
  17 -11  -7  182110   15292  -2
  10  11   7  182110   15292   1
  18 -11  -7    5617   13362  -2
  11  11   7    5617   13362   1
  19 -11  -7  134888   12787  -2
  12  11   7  134888   12787   1
  13  11   7     336    6576   1
  14  11   7   79106   10621   1
  15  11   7   -5152    5152   1
 -21  12   7    7528    5083   1
 -20  12   7   46978    7683   1
 -12 -12  -7   39531    8366  -2
 -19  12   7   39531    8366   1
 -11 -12  -7   66936    7686  -2
 -18  12   7   66936    7686   1
 -10 -12  -7   17114    5469  -2
 -17  12   7   17114    5469   1
  -9 -12  -7  174333   11322  -2
 -16  12   7  174333   11322   1
  -8 -12  -7   19726    5325  -2
 -15  12   7   19726    5325   1
  -7 -12  -7  215257   12745  -2
 -14  12   7  215257   12745   1
  -6 -12  -7   48948    6603  -2
 -13  12   7   48948    6603   1
  -5 -12  -7  275373   11404  -2
 -12  12   7  275373   11404   1
  -4 -12  -7   28232    4705  -2
 -11  12   7   28232    4705   1
  -3 -12  -7  127243    8701  -2
 -10  12   7  127243    8701   1
  -2 -12  -7   25840    4615  -2
  -9  12   7   25840    4615   1
  -1 -12  -7   62186    6025  -2
  -8  12   7   62186    6025   1
   0 -12  -7   41079    5088  -2
  -7  12   7   41079    5088   1
   1 -12  -7  211393    9651  -2
  -6  12   7  211393    9651   1
   2 -12  -7   19042    2860  -2
  -5  12   7   19042    2860   1
   3 -12  -7  158253    7506  -2
  -4  12   7  158253    7506   1
   4 -12  -7   55070    4656  -2
  -3  12   7   55070    4656   1
   5 -12  -7   82574    5078  -2
  -2  12   7   82574    5078   1
   6 -12  -7  197883    8979  -2
  -1  12   7  197883    8979   1
   7 -12  -7  124436    5879  -2
   0  12   7  124436    5879   1
   8 -12  -7  166228    6238  -2
   1  12   7  166228    6238   1
   9 -12  -7  186932    7340  -2
   2  12   7  186932    7340   1
  10 -12  -7  102077    5000  -2
   3  12   7  102077    5000   1
  11 -12  -7  366955    9873  -2
   4  12   7  366955    9873   1
  12 -12  -7   46416    4981  -2
   5  12   7   46416    4981   1
  13 -12  -7  192325    5977  -2
   6  12   7  192325    5977   1
  14 -12  -7   20308    5603  -2
   7  12   7   20308    5603   1
  15 -12  -7   75734    5440  -2
   8  12   7   75734    5440   1
  17 -12  -7   30558    8323  -2
  10  12   7   30558    8323   1
  18 -12  -7   24006    8597  -2
  11  12   7   24006    8597   1
  19 -12  -7   32737    8122  -2
  12  12   7   32737    8122   1
  13  12   7   26817   18273   1
  14  12   7   22257    7718   1
 -21  13   7    2276    4819   1
 -20  13   7   11881    6331   1
 -12 -13  -7   -4268    4268  -2
 -19  13   7   -4268    4268   1
 -11 -13  -7   -2064    4619  -2
 -18  13   7   -2064    4619   1
 -10 -13  -7   -2929    3965  -2
 -17  13   7   -2929    3965   1
  -9 -13  -7   -3845    3845  -2
 -16  13   7   -3845    3845   1
  -8 -13  -7   -1422    6604  -2
 -15  13   7   -1422    6604   1
  -7 -13  -7    4072    4611  -2
 -14  13   7    4072    4611   1
  -6 -13  -7   21032    5930  -2
 -13  13   7   21032    5930   1
  -5 -13  -7      52    4173  -2
 -12  13   7      52    4173   1
  -4 -13  -7    1161    3930  -2
 -11  13   7    1161    3930   1
  -3 -13  -7   -3656    3656  -2
 -10  13   7   -3656    3656   1
  -2 -13  -7   39245    9198  -2
  -9  13   7   39245    9198   1
  -1 -13  -7    6103    4076  -2
  -8  13   7    6103    4076   1
   0 -13  -7   20490    4660  -2
  -7  13   7   20490    4660   1
   1 -13  -7   47222    5779  -2
  -6  13   7   47222    5779   1
   2 -13  -7   -2238    3432  -2
  -5  13   7   -2238    3432   1
   3 -13  -7   -1338    3315  -2
  -4  13   7   -1338    3315   1
   4 -13  -7    -229    2371  -2
  -3  13   7    -229    2371   1
   5 -13  -7    5141    2783  -2
  -2  13   7    5141    2783   1
   6 -13  -7    7527    2808  -2
  -1  13   7    7527    2808   1
   7 -13  -7  126188    8568  -2
   0  13   7  126188    8568   1
   8 -13  -7    7129    3620  -2
   1  13   7    7129    3620   1
   9 -13  -7   40790    3878  -2
   2  13   7   40790    3878   1
  10 -13  -7    1450    2408  -2
   3  13   7    1450    2408   1
  11 -13  -7     387    2292  -2
   4  13   7     387    2292   1
  12 -13  -7   35926    4103  -2
   5  13   7   35926    4103   1
  13 -13  -7     734    2160  -2
   6  13   7     734    2160   1
  14 -13  -7   22889    3636  -2
   7  13   7   22889    3636   1
  15 -13  -7    2677    2177  -2
   8  13   7    2677    2177   1
  16 -13  -7    5503    2282  -2
   9  13   7    5503    2282   1
  17 -13  -7   26020    8143  -2
  10  13   7   26020    8143   1
  18 -13  -7    8186    7022  -2
  11  13   7    8186    7022   1
  19 -13  -7   -2950    6073  -2
  12  13   7   -2950    6073   1
  13  13   7   26328    9017   1
  14  13   7   -5502    5502   1
 -20  14   7    6884    5193   1
 -12 -14  -7    2617    4827  -2
 -19  14   7    2617    4827   1
 -11 -14  -7   59063    9152  -2
 -18  14   7   59063    9152   1
 -10 -14  -7   -3549    4614  -2
 -17  14   7   -3549    4614   1
  -9 -14  -7  126327    9944  -2
 -16  14   7  126327    9944   1
  -8 -14  -7   12299    6645  -2
 -15  14   7   12299    6645   1
  -7 -14  -7  127486   13155  -2
 -14  14   7  127486   13155   1
  -6 -14  -7   13277    4854  -2
 -13  14   7   13277    4854   1
  -5 -14  -7  123376    9394  -2
 -12  14   7  123376    9394   1
  -4 -14  -7    6556    7272  -2
 -11  14   7    6556    7272   1
  -3 -14  -7  275947   12405  -2
 -10  14   7  275947   12405   1
  -2 -14  -7   21270    4742  -2
  -9  14   7   21270    4742   1
  -1 -14  -7  276969   11882  -2
  -8  14   7  276969   11882   1
   0 -14  -7  108983    7864  -2
  -7  14   7  108983    7864   1
   1 -14  -7  224337   11248  -2
  -6  14   7  224337   11248   1
   2 -14  -7   41108    8020  -2
  -5  14   7   41108    8020   1
   3 -14  -7  157009    9457  -2
  -4  14   7  157009    9457   1
   4 -14  -7   23985    5741  -2
  -3  14   7   23985    5741   1
   5 -14  -7  202213   10338  -2
  -2  14   7  202213   10338   1
   6 -14  -7   18925    3082  -2
  -1  14   7   18925    3082   1
   7 -14  -7  265099    8662  -2
   0  14   7  265099    8662   1
   8 -14  -7   36063    4125  -2
   1  14   7   36063    4125   1
   9 -14  -7  220298    7176  -2
   2  14   7  220298    7176   1
  10 -14  -7   21840    3220  -2
   3  14   7   21840    3220   1
  11 -14  -7  154023    8912  -2
   4  14   7  154023    8912   1
  12 -14  -7   17402    3209  -2
   5  14   7   17402    3209   1
  13 -14  -7   92417    5070  -2
   6  14   7   92417    5070   1
  14 -14  -7    9154    2628  -2
   7  14   7    9154    2628   1
  15 -14  -7   77368    4908  -2
   8  14   7   77368    4908   1
  16 -14  -7    7267    3546  -2
   9  14   7    7267    3546   1
  17 -14  -7   44820    7226  -2
  10  14   7   44820    7226   1
  18 -14  -7    5357   13933  -2
  11  14   7    5357   13933   1
  19 -14  -7     953    4672  -2
  12  14   7     953    4672   1
  13  14   7    6756   10360   1
 -12 -15  -7   10307    5351  -2
 -19  15   7   10307    5351   1
 -11 -15  -7    1643    5004  -2
 -18  15   7    1643    5004   1
 -10 -15  -7   35455    6997  -2
 -17  15   7   35455    6997   1
  -9 -15  -7   -3071    7903  -2
 -16  15   7   -3071    7903   1
  -8 -15  -7   88248   18877  -2
 -15  15   7   88248   18877   1
  -7 -15  -7    4609    4535  -2
 -14  15   7    4609    4535   1
  -6 -15  -7   71359    7456  -2
 -13  15   7   71359    7456   1
  -5 -15  -7   30036    6030  -2
 -12  15   7   30036    6030   1
  -4 -15  -7    -861    4309  -2
 -11  15   7    -861    4309   1
  -3 -15  -7    6069    5157  -2
 -10  15   7    6069    5157   1
  -2 -15  -7   -1715    4210  -2
  -9  15   7   -1715    4210   1
  -1 -15  -7    7602    4211  -2
  -8  15   7    7602    4211   1
   0 -15  -7    8308    4275  -2
  -7  15   7    8308    4275   1
   1 -15  -7   31596    5716  -2
  -6  15   7   31596    5716   1
   2 -15  -7   29665    5581  -2
  -5  15   7   29665    5581   1
   3 -15  -7  172987   10210  -2
  -4  15   7  172987   10210   1
   4 -15  -7   25249    5007  -2
  -3  15   7   25249    5007   1
   5 -15  -7  114162    8387  -2
  -2  15   7  114162    8387   1
   6 -15  -7    2990    3563  -2
  -1  15   7    2990    3563   1
   7 -15  -7   75402    7093  -2
   0  15   7   75402    7093   1
   8 -15  -7    -137    3422  -2
   1  15   7    -137    3422   1
   9 -15  -7   56134    6359  -2
   2  15   7   56134    6359   1
  10 -15  -7    3681    3292  -2
   3  15   7    3681    3292   1
  11 -15  -7    2185    2688  -2
   4  15   7    2185    2688   1
  12 -15  -7   37697    4045  -2
   5  15   7   37697    4045   1
  13 -15  -7   19912    4058  -2
   6  15   7   19912    4058   1
  14 -15  -7   43692    4099  -2
   7  15   7   43692    4099   1
  15 -15  -7  142735    6867  -2
   8  15   7  142735    6867   1
  16 -15  -7    4346    3970  -2
   9  15   7    4346    3970   1
  17 -15  -7  163090    6029  -2
  10  15   7  163090    6029   1
  19 -15  -7   48796   25959  -2
  12  15   7   48796   25959   1
 -10 -16  -7    4361    5012  -2
 -17  16   7    4361    5012   1
  -9 -16  -7  114951   10077  -2
 -16  16   7  114951   10077   1
  -8 -16  -7    4194    4940  -2
 -15  16   7    4194    4940   1
  -7 -16  -7  138872   10990  -2
 -14  16   7  138872   10990   1
  -6 -16  -7   18571    6615  -2
 -13  16   7   18571    6615   1
  -5 -16  -7   85393   10856  -2
 -12  16   7   85393   10856   1
  -4 -16  -7   24581    5657  -2
 -11  16   7   24581    5657   1
  -3 -16  -7  111759    9112  -2
 -10  16   7  111759    9112   1
  -2 -16  -7   37842    5960  -2
  -9  16   7   37842    5960   1
  -1 -16  -7  224178   12518  -2
  -8  16   7  224178   12518   1
   0 -16  -7   17358    4721  -2
  -7  16   7   17358    4721   1
   1 -16  -7  264251   12881  -2
  -6  16   7  264251   12881   1
   2 -16  -7   23362    4510  -2
  -5  16   7   23362    4510   1
   3 -16  -7  260053   12522  -2
  -4  16   7  260053   12522   1
   4 -16  -7   39793   11055  -2
  -3  16   7   39793   11055   1
   5 -16  -7  246050   11831  -2
  -2  16   7  246050   11831   1
   6 -16  -7   41938    5357  -2
  -1  16   7   41938    5357   1
   7 -16  -7  206663   11021  -2
   0  16   7  206663   11021   1
   8 -16  -7   17419    4186  -2
   1  16   7   17419    4186   1
   9 -16  -7  179372   10548  -2
   2  16   7  179372   10548   1
  10 -16  -7   21235    4886  -2
   3  16   7   21235    4886   1
  11 -16  -7  114212    6766  -2
   4  16   7  114212    6766   1
  12 -16  -7   30231    3767  -2
   5  16   7   30231    3767   1
  13 -16  -7   27677    4551  -2
   6  16   7   27677    4551   1
  14 -16  -7   21426    3453  -2
   7  16   7   21426    3453   1
  15 -16  -7   14552    4921  -2
   8  16   7   14552    4921   1
  16 -16  -7   41291    5168  -2
   9  16   7   41291    5168   1
  17 -16  -7   48876    4254  -2
  10  16   7   48876    4254   1
  -9 -17  -7    6670    5895  -2
 -16  17   7    6670    5895   1
  -8 -17  -7   14380    6031  -2
 -15  17   7   14380    6031   1
  -7 -17  -7    5687    5038  -2
 -14  17   7    5687    5038   1
  -6 -17  -7    4736    5667  -2
 -13  17   7    4736    5667   1
  -5 -17  -7   23075    6135  -2
 -12  17   7   23075    6135   1
  -4 -17  -7   -4452    4452  -2
 -11  17   7   -4452    4452   1
  -3 -17  -7   19655    5792  -2
 -10  17   7   19655    5792   1
  -2 -17  -7     642    4441  -2
  -9  17   7     642    4441   1
  -1 -17  -7   -3918    3918  -2
  -8  17   7   -3918    3918   1
   0 -17  -7    8721    4821  -2
  -7  17   7    8721    4821   1
   1 -17  -7      11    6407  -2
  -6  17   7      11    6407   1
   2 -17  -7    2210    5336  -2
  -5  17   7    2210    5336   1
   3 -17  -7   -1086    3738  -2
  -4  17   7   -1086    3738   1
   4 -17  -7   26538    7507  -2
  -3  17   7   26538    7507   1
   5 -17  -7    -404    3627  -2
  -2  17   7    -404    3627   1
   6 -17  -7    3605    4004  -2
  -1  17   7    3605    4004   1
   7 -17  -7     333    3797  -2
   0  17   7     333    3797   1
   8 -17  -7    -911    3800  -2
   1  17   7    -911    3800   1
   9 -17  -7    -927    3879  -2
   2  17   7    -927    3879   1
  10 -17  -7    2456    4225  -2
   3  17   7    2456    4225   1
  11 -17  -7     918    4093  -2
   4  17   7     918    4093   1
  12 -17  -7   -5711    5711  -2
   5  17   7   -5711    5711   1
  13 -17  -7     834    5643  -2
   6  17   7     834    5643   1
  14 -17  -7    5886    3048  -2
   7  17   7    5886    3048   1
  15 -17  -7    3692    4406  -2
   8  17   7    3692    4406   1
  16 -17  -7   10600    6354  -2
   9  17   7   10600    6354   1
  -7 -18  -7   56809    7829  -2
 -14  18   7   56809    7829   1
  -6 -18  -7   23947    7858  -2
 -13  18   7   23947    7858   1
  -5 -18  -7   40195    9850  -2
 -12  18   7   40195    9850   1
  -4 -18  -7   10694    6217  -2
 -11  18   7   10694    6217   1
  -3 -18  -7   72430    8523  -2
 -10  18   7   72430    8523   1
  -2 -18  -7    7960    5176  -2
  -9  18   7    7960    5176   1
  -1 -18  -7   90724    8977  -2
  -8  18   7   90724    8977   1
   0 -18  -7   11803    5590  -2
  -7  18   7   11803    5590   1
   1 -18  -7   68121    8008  -2
  -6  18   7   68121    8008   1
   2 -18  -7   24297    7607  -2
  -5  18   7   24297    7607   1
   3 -18  -7   64925    7620  -2
  -4  18   7   64925    7620   1
   4 -18  -7   29633    5917  -2
  -3  18   7   29633    5917   1
   5 -18  -7   69519    7593  -2
  -2  18   7   69519    7593   1
   6 -18  -7    3510    4309  -2
  -1  18   7    3510    4309   1
   7 -18  -7   78249   12063  -2
   0  18   7   78249   12063   1
   8 -18  -7   14728    5624  -2
   1  18   7   14728    5624   1
   9 -18  -7   29787    5857  -2
   2  18   7   29787    5857   1
  10 -18  -7   13783    6226  -2
   3  18   7   13783    6226   1
  11 -18  -7   15250    5220  -2
   4  18   7   15250    5220   1
  12 -18  -7    5566    4409  -2
   5  18   7    5566    4409   1
  13 -18  -7   65387    7197  -2
   6  18   7   65387    7197   1
  14 -18  -7   -3077    3900  -2
   7  18   7   -3077    3900   1
  -5 -19  -7   -2559    4694  -2
 -12  19   7   -2559    4694   1
  -4 -19  -7    7628    5925  -2
 -11  19   7    7628    5925   1
  -3 -19  -7    2657    5874  -2
 -10  19   7    2657    5874   1
  -2 -19  -7    1012    4748  -2
  -9  19   7    1012    4748   1
  -1 -19  -7    1215    5287  -2
  -8  19   7    1215    5287   1
   0 -19  -7    3549    6072  -2
  -7  19   7    3549    6072   1
   1 -19  -7    2011    4554  -2
  -6  19   7    2011    4554   1
   2 -19  -7    4915    4631  -2
  -5  19   7    4915    4631   1
   3 -19  -7    2788    4256  -2
[truncated: 400,344 more chars]
