# Supplementary material for: Synthesis, Crystal Structure and Spin-Orbit Coupling Analysis for Mono-Scorpionate Eu(III) Complexes
Source: Preprints.org preprint supplement (doi:10.20944/preprints202308.1806.v1), 2023-08-25
Supplement: Supplementary file 1 [file supplementary › PPR4.cif]

data_ppr4
_audit_creation_date               2023-07-28
_audit_creation_method
;
Olex2 1.5
(compiled 2023.03.06 svn.rbb2c1857 for OlexSys, GUI svn.r6748)
;
_shelx_SHELXL_version_number       '2014/7'
_audit_contact_author_address      ?
_audit_contact_author_email        ?
_audit_contact_author_name         ''
_audit_contact_author_phone        ?
_publ_contact_author_id_orcid      ?
_publ_section_references
;
Dolomanov, O.V., Bourhis, L.J., Gildea, R.J, Howard, J.A.K. & Puschmann, H.
 (2009), J. Appl. Cryst. 42, 339-341.

Sheldrick, G.M. (2015). Acta Cryst. A71, 3-8.

Sheldrick, G.M. (2015). Acta Cryst. C71, 3-8.
;
_chemical_name_common              ?
_chemical_name_systematic          ?
_chemical_formula_moiety           'C16 H22 Eu N9 O9, C2 H3 N'
_chemical_formula_sum              'C18 H25 Eu N10 O9'
_chemical_formula_weight           677.44
_chemical_melting_point            ?
loop_
  _atom_type_symbol
  _atom_type_description
  _atom_type_scat_dispersion_real
  _atom_type_scat_dispersion_imag
  _atom_type_scat_source
 'C' 'C' 0.0033 0.0016 'International Tables Vol C Tables 4.2.6.8 and 6.1.1.4'
 'H' 'H' 0.0000 0.0000 'International Tables Vol C Tables 4.2.6.8 and 6.1.1.4'
 'Eu' 'Eu' -0.1578 3.6682
 'International Tables Vol C Tables 4.2.6.8 and 6.1.1.4'
 'N' 'N' 0.0061 0.0033 'International Tables Vol C Tables 4.2.6.8 and 6.1.1.4'
 'O' 'O' 0.0106 0.0060 'International Tables Vol C Tables 4.2.6.8 and 6.1.1.4'

_shelx_space_group_comment
;
The symmetry employed for this shelxl refinement is uniquely defined
by the following loop, which should always be used as a source of
symmetry information in preference to the above space-group names.
They are only intended as comments.
;
_space_group_crystal_system        'monoclinic'
_space_group_IT_number             14
_space_group_name_H-M_alt          'P 1 21/n 1'
_space_group_name_Hall             '-P 2yn'
loop_
  _space_group_symop_operation_xyz
 'x, y, z'
 '-x+1/2, y+1/2, -z+1/2'
 '-x, -y, -z'
 'x-1/2, -y-1/2, z-1/2'

_cell_length_a                     10.8259(6)
_cell_length_b                     14.9846(7)
_cell_length_c                     16.4034(8)
_cell_angle_alpha                  90
_cell_angle_beta                   95.786(2)
_cell_angle_gamma                  90
_cell_volume                       2647.4(2)
_cell_formula_units_Z              4
_cell_measurement_reflns_used      9905
_cell_measurement_temperature      150(2)
_cell_measurement_theta_max        30.46
_cell_measurement_theta_min        2.33
_shelx_estimated_absorpt_T_max     0.829
_shelx_estimated_absorpt_T_min     0.793
_exptl_absorpt_coefficient_mu      2.434
_exptl_absorpt_correction_T_max    0.7461
_exptl_absorpt_correction_T_min    0.6154
_exptl_absorpt_correction_type     multi-scan
_exptl_absorpt_process_details    
 'SADABS-2016/2 (Bruker,2016/2) was used for absorption correction. wR2(int) was 0.1235 before and 0.0552 after correction. The Ratio of minimum to maximum transmission is 0.8248. The \l/2 correction factor is Not present.'
_exptl_absorpt_special_details     ?
_exptl_crystal_colour              colourless
_exptl_crystal_colour_primary      colourless
_exptl_crystal_density_diffrn      1.700
_exptl_crystal_density_meas        ?
_exptl_crystal_density_method      ?
_exptl_crystal_description         prism
_exptl_crystal_F_000               1352
_exptl_crystal_size_max            0.1
_exptl_crystal_size_mid            0.1
_exptl_crystal_size_min            0.08
_exptl_transmission_factor_max     ?
_exptl_transmission_factor_min     ?
_diffrn_reflns_av_R_equivalents    0.0473
_diffrn_reflns_av_unetI/netI       0.0393
_diffrn_reflns_Laue_measured_fraction_full  0.997
_diffrn_reflns_Laue_measured_fraction_max  0.988
_diffrn_reflns_limit_h_max         15
_diffrn_reflns_limit_h_min         -13
_diffrn_reflns_limit_k_max         21
_diffrn_reflns_limit_k_min         -21
_diffrn_reflns_limit_l_max         22
_diffrn_reflns_limit_l_min         -23
_diffrn_reflns_number              36783
_diffrn_reflns_point_group_measured_fraction_full  0.997
_diffrn_reflns_point_group_measured_fraction_max  0.988
_diffrn_reflns_theta_full          25.242
_diffrn_reflns_theta_max           30.524
_diffrn_reflns_theta_min           2.158
_diffrn_ambient_temperature        150(2)
_diffrn_detector                   PIXEL
_diffrn_detector_area_resol_mean   7.41
_diffrn_detector_type              'Bruker PHOTON III area detector'
_diffrn_measured_fraction_theta_full  0.997
_diffrn_measured_fraction_theta_max  0.988
_diffrn_measurement_device         'three-circle diffractometer'
_diffrn_measurement_device_type    'Bruker D8 Venture diffractometer'
_diffrn_measurement_method         '\w and \f scans'
_diffrn_radiation_monochromator    'Incoatec HELIOS multilayer mirrors'
_diffrn_radiation_type             'MoK\a'
_diffrn_radiation_wavelength       0.71073
_diffrn_source                     'Incoatec IuS3.0 microfocus X-ray tube'
_diffrn_source_current             1.4
_diffrn_source_power               0.07
_diffrn_source_voltage             50.0
_diffrn_special_details            ?
_diffrn_standards_interval_count   .
_diffrn_standards_interval_time    .
_diffrn_standards_number           .
_reflns_Friedel_coverage           0.000
_reflns_Friedel_fraction_full      .
_reflns_Friedel_fraction_max       .
_reflns_number_gt                  6803
_reflns_number_total               8022
_reflns_special_details
;
 Reflections were merged by SHELXL according to the crystal
 class for the calculation of statistics and refinement.
 
 _reflns_Friedel_fraction is defined as the number of unique
 Friedel pairs measured divided by the number that would be
 possible theoretically, ignoring centric projections and
 systematic absences.
;
_reflns_threshold_expression       'I > 2\s(I)'
_computing_cell_refinement         'Bruker SAINT'
_computing_data_collection         'Bruker APEX3'
_computing_data_reduction          'Bruker SAINT'
_computing_molecular_graphics      'Olex2 1.5 (Dolomanov et al., 2009)'
_computing_publication_material    'Olex2 1.5 (Dolomanov et al., 2009)'
_computing_structure_refinement    'SHELXL 2014/7 (Sheldrick, 2015)'
_computing_structure_solution      'SHELXT 2014/5 (Sheldrick, 2014)'
_refine_diff_density_max           0.524
_refine_diff_density_min           -0.618
_refine_diff_density_rms           0.106
_refine_ls_extinction_coef         .
_refine_ls_extinction_method       none
_refine_ls_goodness_of_fit_ref     1.072
_refine_ls_hydrogen_treatment      constr
_refine_ls_matrix_type             full
_refine_ls_number_parameters       350
_refine_ls_number_reflns           8022
_refine_ls_number_restraints       0
_refine_ls_R_factor_all            0.0354
_refine_ls_R_factor_gt             0.0276
_refine_ls_restrained_S_all        1.072
_refine_ls_shift/su_max            0.001
_refine_ls_shift/su_mean           0.000
_refine_ls_structure_factor_coef   Fsqd
_refine_ls_weighting_details      
 'w=1/[\s^2^(Fo^2^)+(0.0164P)^2^+1.4563P] where P=(Fo^2^+2Fc^2^)/3'
_refine_ls_weighting_scheme        calc
_refine_ls_wR_factor_gt            0.0525
_refine_ls_wR_factor_ref           0.0581
_refine_special_details            ?
_olex2_refinement_description
;
1. Fixed Uiso
 At 1.2 times of:
  All C(H) groups
 At 1.5 times of:
  All C(H,H,H) groups
2.a Ternary CH refined with riding coordinates:
 C1(H1)
2.b Aromatic/amide H refined with riding coordinates:
 C3(H3), C8(H8), C13(H13)
2.c Idealised Me refined as rotating group:
 C5(H5A,H5B,H5C), C6(H6A,H6B,H6C), C10(H10A,H10B,H10C), C11(H11A,H11B,H11C),
 C15(H15A,H15B,H15C), C16(H16A,H16B,H16C), C18(H18A,H18B,H18C)
;
_atom_sites_solution_hydrogens     geom
_atom_sites_solution_primary       dual
_atom_sites_solution_secondary     ?
loop_
  _atom_site_label
  _atom_site_type_symbol
  _atom_site_fract_x
  _atom_site_fract_y
  _atom_site_fract_z
  _atom_site_U_iso_or_equiv
  _atom_site_adp_type
  _atom_site_occupancy
  _atom_site_site_symmetry_order
  _atom_site_calc_flag
  _atom_site_refinement_flags_posn
  _atom_site_refinement_flags_adp
  _atom_site_refinement_flags_occupancy
  _atom_site_disorder_assembly
  _atom_site_disorder_group
 Eu1 Eu 0.41769(2) 0.33730(2) 0.66202(2) 0.01718(4) Uani 1 1 d . . . . .
 O1 O 0.28246(16) 0.40972(11) 0.75271(11) 0.0267(4) Uani 1 1 d . . . . .
 O2 O 0.24973(16) 0.26869(11) 0.73404(11) 0.0277(4) Uani 1 1 d . . . . .
 O3 O 0.14142(18) 0.34328(12) 0.81645(12) 0.0356(4) Uani 1 1 d . . . . .
 O4 O 0.22548(16) 0.36616(12) 0.57124(11) 0.0291(4) Uani 1 1 d . . . . .
 O5 O 0.39893(17) 0.38534(12) 0.51877(11) 0.0309(4) Uani 1 1 d . . . . .
 O6 O 0.22428(19) 0.40746(14) 0.44338(12) 0.0433(5) Uani 1 1 d . . . . .
 O7 O 0.36327(17) 0.19795(11) 0.58668(11) 0.0289(4) Uani 1 1 d . . . . .
 O8 O 0.48882(16) 0.18541(11) 0.69675(11) 0.0277(4) Uani 1 1 d . . . . .
 O9 O 0.42088(19) 0.06584(12) 0.63134(14) 0.0446(5) Uani 1 1 d . . . . .
 N1 N 0.64085(18) 0.34576(12) 0.62735(12) 0.0196(4) Uani 1 1 d . . . . .
 N2 N 0.72797(17) 0.40203(12) 0.66647(11) 0.0191(4) Uani 1 1 d . . . . .
 N3 N 0.56181(17) 0.35013(12) 0.79510(11) 0.0182(4) Uani 1 1 d . . . . .
 N4 N 0.66642(17) 0.40242(12) 0.80215(11) 0.0186(4) Uani 1 1 d . . . . .
 N5 N 0.48753(17) 0.49708(12) 0.67745(12) 0.0194(4) Uani 1 1 d . . . . .
 N6 N 0.60409(17) 0.52219(12) 0.70996(11) 0.0179(4) Uani 1 1 d . . . . .
 N7 N 0.22116(19) 0.34050(13) 0.76942(13) 0.0242(4) Uani 1 1 d . . . . .
 N8 N 0.2810(2) 0.38682(14) 0.50858(13) 0.0284(5) Uani 1 1 d . . . . .
 N9 N 0.42373(19) 0.14631(13) 0.63803(14) 0.0266(5) Uani 1 1 d . . . . .
 C1 C 0.6980(2) 0.45689(14) 0.73439(14) 0.0195(4) Uani 1 1 d . . . . .
 H1 H 0.7751 0.4905 0.7541 0.023 Uiso 1 1 calc R U . . .
 C2 C 0.7019(2) 0.30154(16) 0.57262(14) 0.0236(5) Uani 1 1 d . . . . .
 C3 C 0.8264(2) 0.32922(18) 0.57789(16) 0.0300(6) Uani 1 1 d . . . . .
 H3 H 0.8886 0.3075 0.5461 0.036 Uiso 1 1 calc R U . . .
 C4 C 0.8414(2) 0.39344(16) 0.63745(15) 0.0237(5) Uani 1 1 d . . . . .
 C5 C 0.6386(3) 0.23380(18) 0.51646(16) 0.0318(6) Uani 1 1 d . . . . .
 H5A H 0.6432 0.1753 0.5432 0.048 Uiso 1 1 calc R U . . .
 H5B H 0.6796 0.2310 0.4659 0.048 Uiso 1 1 calc R U . . .
 H5C H 0.5514 0.2506 0.5033 0.048 Uiso 1 1 calc R U . . .
 C6 C 0.9517(2) 0.4484(2) 0.66686(17) 0.0329(6) Uani 1 1 d . . . . .
 H6A H 0.9334 0.5116 0.6558 0.049 Uiso 1 1 calc R U . . .
 H6B H 1.0228 0.4302 0.6382 0.049 Uiso 1 1 calc R U . . .
 H6C H 0.9715 0.4395 0.7259 0.049 Uiso 1 1 calc R U . . .
 C7 C 0.5666(2) 0.30578(16) 0.86643(14) 0.0212(5) Uani 1 1 d . . . . .
 C8 C 0.6731(2) 0.32912(16) 0.91775(15) 0.0251(5) Uani 1 1 d . . . . .
 H8 H 0.6970 0.3067 0.9712 0.030 Uiso 1 1 calc R U . . .
 C9 C 0.7359(2) 0.39052(16) 0.87600(14) 0.0217(5) Uani 1 1 d . . . . .
 C10 C 0.4672(2) 0.24233(18) 0.88581(16) 0.0304(6) Uani 1 1 d . . . . .
 H10A H 0.4042 0.2746 0.9131 0.046 Uiso 1 1 calc R U . . .
 H10B H 0.5035 0.1952 0.9221 0.046 Uiso 1 1 calc R U . . .
 H10C H 0.4286 0.2156 0.8350 0.046 Uiso 1 1 calc R U . . .
 C11 C 0.8541(2) 0.4390(2) 0.90012(17) 0.0358(6) Uani 1 1 d . . . . .
 H11A H 0.9177 0.4191 0.8657 0.054 Uiso 1 1 calc R U . . .
 H11B H 0.8817 0.4265 0.9577 0.054 Uiso 1 1 calc R U . . .
 H11C H 0.8406 0.5033 0.8928 0.054 Uiso 1 1 calc R U . . .
 C12 C 0.4263(2) 0.57386(15) 0.66294(15) 0.0235(5) Uani 1 1 d . . . . .
 C13 C 0.5028(2) 0.64652(15) 0.68672(16) 0.0251(5) Uani 1 1 d . . . . .
 H13 H 0.4806 0.7078 0.6830 0.030 Uiso 1 1 calc R U . . .
 C14 C 0.6151(2) 0.61265(15) 0.71617(14) 0.0219(5) Uani 1 1 d . . . . .
 C15 C 0.2949(2) 0.57615(17) 0.62646(19) 0.0358(7) Uani 1 1 d . . . . .
 H15A H 0.2917 0.5667 0.5672 0.054 Uiso 1 1 calc R U . . .
 H15B H 0.2586 0.6343 0.6372 0.054 Uiso 1 1 calc R U . . .
 H15C H 0.2480 0.5290 0.6509 0.054 Uiso 1 1 calc R U . . .
 C16 C 0.7314(2) 0.65794(16) 0.74949(17) 0.0302(6) Uani 1 1 d . . . . .
 H16A H 0.7510 0.6415 0.8072 0.045 Uiso 1 1 calc R U . . .
 H16B H 0.7205 0.7227 0.7450 0.045 Uiso 1 1 calc R U . . .
 H16C H 0.7996 0.6394 0.7182 0.045 Uiso 1 1 calc R U . . .
 N10 N 0.6165(3) 0.5881(2) 0.9415(2) 0.0694(10) Uani 1 1 d . . . . .
 C17 C 0.5166(3) 0.5772(2) 0.91698(19) 0.0414(7) Uani 1 1 d . . . . .
 C18 C 0.3894(3) 0.5640(3) 0.8847(2) 0.0530(9) Uani 1 1 d . . . . .
 H18A H 0.3848 0.5164 0.8435 0.079 Uiso 1 1 calc R U . . .
 H18B H 0.3565 0.6194 0.8593 0.079 Uiso 1 1 calc R U . . .
 H18C H 0.3401 0.5472 0.9292 0.079 Uiso 1 1 calc R U . . .

loop_
  _atom_site_aniso_label
  _atom_site_aniso_U_11
  _atom_site_aniso_U_22
  _atom_site_aniso_U_33
  _atom_site_aniso_U_23
  _atom_site_aniso_U_13
  _atom_site_aniso_U_12
 Eu1 0.01517(6) 0.01963(5) 0.01617(6) 0.00023(4) -0.00113(4) -0.00050(4)
 O1 0.0241(9) 0.0242(8) 0.0329(10) -0.0018(7) 0.0085(7) -0.0051(7)
 O2 0.0288(10) 0.0223(8) 0.0330(10) 0.0010(7) 0.0075(8) -0.0021(7)
 O3 0.0331(11) 0.0397(10) 0.0370(11) 0.0035(8) 0.0184(9) -0.0028(8)
 O4 0.0242(9) 0.0383(10) 0.0241(9) 0.0028(8) -0.0015(7) 0.0037(8)
 O5 0.0275(10) 0.0416(10) 0.0227(9) 0.0066(8) -0.0020(7) -0.0009(8)
 O6 0.0466(13) 0.0527(13) 0.0271(10) 0.0066(9) -0.0138(9) 0.0074(10)
 O7 0.0318(10) 0.0268(8) 0.0260(9) -0.0036(7) -0.0085(8) 0.0013(8)
 O8 0.0243(9) 0.0264(8) 0.0300(10) 0.0000(7) -0.0089(7) 0.0018(7)
 O9 0.0451(13) 0.0218(9) 0.0642(15) -0.0081(9) -0.0075(10) 0.0049(9)
 N1 0.0187(10) 0.0217(9) 0.0180(10) -0.0003(7) 0.0002(7) 0.0006(7)
 N2 0.0162(9) 0.0241(9) 0.0169(9) 0.0013(8) 0.0015(7) 0.0018(7)
 N3 0.0172(9) 0.0219(9) 0.0151(9) 0.0004(7) -0.0004(7) -0.0026(7)
 N4 0.0172(9) 0.0222(9) 0.0160(9) 0.0013(7) -0.0006(7) -0.0016(7)
 N5 0.0144(9) 0.0203(9) 0.0230(10) 0.0011(8) -0.0008(7) 0.0007(7)
 N6 0.0160(9) 0.0181(8) 0.0192(9) 0.0007(7) -0.0002(7) 0.0002(7)
 N7 0.0208(10) 0.0273(10) 0.0246(11) 0.0040(8) 0.0024(8) -0.0015(8)
 N8 0.0336(13) 0.0266(10) 0.0229(11) -0.0010(9) -0.0076(9) 0.0032(9)
 N9 0.0225(11) 0.0247(10) 0.0319(12) -0.0025(9) 0.0000(9) 0.0017(8)
 C1 0.0157(11) 0.0210(10) 0.0215(11) 0.0007(9) 0.0007(9) -0.0010(8)
 C2 0.0264(13) 0.0280(11) 0.0165(11) 0.0018(9) 0.0029(9) 0.0053(10)
 C3 0.0240(13) 0.0430(15) 0.0243(13) 0.0029(11) 0.0090(10) 0.0089(11)
 C4 0.0160(11) 0.0335(12) 0.0223(12) 0.0071(10) 0.0049(9) 0.0061(9)
 C5 0.0347(15) 0.0373(14) 0.0233(13) -0.0089(11) 0.0030(11) 0.0047(12)
 C6 0.0182(12) 0.0475(16) 0.0335(15) 0.0049(12) 0.0059(10) -0.0002(11)
 C7 0.0212(12) 0.0253(11) 0.0173(11) -0.0015(9) 0.0032(9) -0.0007(9)
 C8 0.0250(13) 0.0313(12) 0.0183(12) 0.0027(10) -0.0018(9) -0.0003(10)
 C9 0.0189(11) 0.0273(11) 0.0177(11) -0.0002(9) -0.0036(9) 0.0002(9)
 C10 0.0309(14) 0.0383(14) 0.0220(12) 0.0082(11) 0.0023(10) -0.0102(11)
 C11 0.0291(15) 0.0450(16) 0.0306(14) 0.0031(12) -0.0094(11) -0.0105(12)
 C12 0.0222(12) 0.0215(10) 0.0263(13) 0.0032(9) 0.0003(9) 0.0024(9)
 C13 0.0264(13) 0.0194(10) 0.0293(13) 0.0012(9) 0.0015(10) 0.0036(9)
 C14 0.0261(12) 0.0182(10) 0.0215(12) 0.0005(9) 0.0035(9) -0.0016(9)
 C15 0.0236(14) 0.0262(12) 0.0547(19) 0.0047(12) -0.0100(12) 0.0049(10)
 C16 0.0328(15) 0.0250(12) 0.0317(14) -0.0030(10) -0.0017(11) -0.0079(11)
 N10 0.0466(19) 0.073(2) 0.087(3) 0.0177(19) -0.0016(17) -0.0122(17)
 C17 0.0458(19) 0.0382(15) 0.0411(17) -0.0031(13) 0.0083(14) 0.0002(14)
 C18 0.044(2) 0.071(2) 0.0436(19) -0.0143(17) -0.0007(15) -0.0055(17)

_geom_special_details
;
 All esds (except the esd in the dihedral angle between two l.s. planes)
 are estimated using the full covariance matrix.  The cell esds are taken
 into account individually in the estimation of esds in distances, angles
 and torsion angles; correlations between esds in cell parameters are only
 used when they are defined by crystal symmetry.  An approximate (isotropic)
 treatment of cell esds is used for estimating esds involving l.s. planes.
;
loop_
  _geom_bond_atom_site_label_1
  _geom_bond_atom_site_label_2
  _geom_bond_distance
  _geom_bond_site_symmetry_2
  _geom_bond_publ_flag
 Eu1 O1 2.4440(17) . ?
 Eu1 O2 2.4883(17) . ?
 Eu1 O4 2.4718(17) . ?
 Eu1 O5 2.4465(17) . ?
 Eu1 O7 2.4674(17) . ?
 Eu1 O8 2.4514(17) . ?
 Eu1 N1 2.5402(19) . ?
 Eu1 N3 2.5592(19) . ?
 Eu1 N5 2.5158(18) . ?
 Eu1 N7 2.896(2) . ?
 Eu1 N8 2.885(2) . ?
 Eu1 N9 2.890(2) . ?
 O1 N7 1.276(2) . ?
 O2 N7 1.275(3) . ?
 O3 N7 1.215(3) . ?
 O4 N8 1.280(3) . ?
 O5 N8 1.271(3) . ?
 O6 N8 1.218(3) . ?
 O7 N9 1.275(3) . ?
 O8 N9 1.277(3) . ?
 O9 N9 1.211(3) . ?
 N1 N2 1.375(3) . ?
 N1 C2 1.342(3) . ?
 N2 C1 1.447(3) . ?
 N2 C4 1.367(3) . ?
 N3 N4 1.372(2) . ?
 N3 C7 1.342(3) . ?
 N4 C1 1.448(3) . ?
 N4 C9 1.371(3) . ?
 N5 N6 1.372(2) . ?
 N5 C12 1.337(3) . ?
 N6 C1 1.439(3) . ?
 N6 C14 1.364(3) . ?
 C1 H1 1.0000 . ?
 C2 C3 1.405(4) . ?
 C2 C5 1.490(3) . ?
 C3 H3 0.9500 . ?
 C3 C4 1.369(4) . ?
 C4 C6 1.490(4) . ?
 C5 H5A 0.9800 . ?
 C5 H5B 0.9800 . ?
 C5 H5C 0.9800 . ?
 C6 H6A 0.9800 . ?
 C6 H6B 0.9800 . ?
 C6 H6C 0.9800 . ?
 C7 C8 1.401(3) . ?
 C7 C10 1.495(3) . ?
 C8 H8 0.9500 . ?
 C8 C9 1.368(3) . ?
 C9 C11 1.490(3) . ?
 C10 H10A 0.9800 . ?
 C10 H10B 0.9800 . ?
 C10 H10C 0.9800 . ?
 C11 H11A 0.9800 . ?
 C11 H11B 0.9800 . ?
 C11 H11C 0.9800 . ?
 C12 C13 1.399(3) . ?
 C12 C15 1.487(3) . ?
 C13 H13 0.9500 . ?
 C13 C14 1.360(3) . ?
 C14 C16 1.485(3) . ?
 C15 H15A 0.9800 . ?
 C15 H15B 0.9800 . ?
 C15 H15C 0.9800 . ?
 C16 H16A 0.9800 . ?
 C16 H16B 0.9800 . ?
 C16 H16C 0.9800 . ?
 N10 C17 1.128(4) . ?
 C17 C18 1.438(4) . ?
 C18 H18A 0.9800 . ?
 C18 H18B 0.9800 . ?
 C18 H18C 0.9800 . ?

loop_
  _geom_angle_atom_site_label_1
  _geom_angle_atom_site_label_2
  _geom_angle_atom_site_label_3
  _geom_angle
  _geom_angle_site_symmetry_1
  _geom_angle_site_symmetry_3
  _geom_angle_publ_flag
 O1 Eu1 O2 51.92(5) . . ?
 O1 Eu1 O4 76.67(6) . . ?
 O1 Eu1 O5 117.20(6) . . ?
 O1 Eu1 O7 123.59(6) . . ?
 O1 Eu1 O8 117.66(6) . . ?
 O1 Eu1 N1 139.08(6) . . ?
 O1 Eu1 N3 78.38(6) . . ?
 O1 Eu1 N5 73.06(6) . . ?
 O1 Eu1 N7 25.91(5) . . ?
 O1 Eu1 N8 97.51(6) . . ?
 O1 Eu1 N9 123.07(6) . . ?
 O2 Eu1 N1 152.11(6) . . ?
 O2 Eu1 N3 92.17(6) . . ?
 O2 Eu1 N5 124.89(6) . . ?
 O2 Eu1 N7 26.01(5) . . ?
 O2 Eu1 N8 100.68(6) . . ?
 O2 Eu1 N9 71.53(6) . . ?
 O4 Eu1 O2 75.36(6) . . ?
 O4 Eu1 N1 128.19(6) . . ?
 O4 Eu1 N3 154.76(6) . . ?
 O4 Eu1 N5 96.91(6) . . ?
 O4 Eu1 N7 74.82(6) . . ?
 O4 Eu1 N8 26.21(6) . . ?
 O4 Eu1 N9 96.92(6) . . ?
 O5 Eu1 O2 125.71(6) . . ?
 O5 Eu1 O4 52.16(6) . . ?
 O5 Eu1 O7 77.02(6) . . ?
 O5 Eu1 O8 119.35(6) . . ?
 O5 Eu1 N1 76.06(6) . . ?
 O5 Eu1 N3 141.41(6) . . ?
 O5 Eu1 N5 79.14(6) . . ?
 O5 Eu1 N7 125.76(6) . . ?
 O5 Eu1 N8 25.95(6) . . ?
 O5 Eu1 N9 99.29(6) . . ?
 O7 Eu1 O2 74.88(6) . . ?
 O7 Eu1 O4 72.68(6) . . ?
 O7 Eu1 N1 96.58(6) . . ?
 O7 Eu1 N3 125.81(6) . . ?
 O7 Eu1 N5 155.49(6) . . ?
 O7 Eu1 N7 99.54(6) . . ?
 O7 Eu1 N8 72.85(6) . . ?
 O7 Eu1 N9 26.03(6) . . ?
 O8 Eu1 O2 74.55(6) . . ?
 O8 Eu1 O4 121.87(6) . . ?
 O8 Eu1 O7 51.99(6) . . ?
 O8 Eu1 N1 79.33(6) . . ?
 O8 Eu1 N3 73.82(6) . . ?
 O8 Eu1 N5 140.90(6) . . ?
 O8 Eu1 N7 96.13(6) . . ?
 O8 Eu1 N8 124.26(6) . . ?
 O8 Eu1 N9 26.03(6) . . ?
 N1 Eu1 N3 71.06(6) . . ?
 N1 Eu1 N7 155.35(6) . . ?
 N1 Eu1 N8 101.98(6) . . ?
 N1 Eu1 N9 89.08(6) . . ?
 N3 Eu1 N7 84.38(6) . . ?
 N3 Eu1 N8 160.01(6) . . ?
 N3 Eu1 N9 99.81(6) . . ?
 N5 Eu1 N1 72.06(6) . . ?
 N5 Eu1 N3 72.03(6) . . ?
 N5 Eu1 N7 98.91(6) . . ?
 N5 Eu1 N8 88.02(6) . . ?
 N5 Eu1 N9 160.95(6) . . ?
 N8 Eu1 N7 100.53(6) . . ?
 N8 Eu1 N9 98.77(6) . . ?
 N9 Eu1 N7 97.31(6) . . ?
 N7 O1 Eu1 97.25(13) . . ?
 N7 O2 Eu1 95.15(13) . . ?
 N8 O4 Eu1 95.23(13) . . ?
 N8 O5 Eu1 96.68(14) . . ?
 N9 O7 Eu1 95.85(13) . . ?
 N9 O8 Eu1 96.56(13) . . ?
 N2 N1 Eu1 123.32(13) . . ?
 C2 N1 Eu1 131.95(16) . . ?
 C2 N1 N2 104.73(18) . . ?
 N1 N2 C1 120.74(18) . . ?
 C4 N2 N1 112.20(18) . . ?
 C4 N2 C1 126.89(19) . . ?
 N4 N3 Eu1 122.80(13) . . ?
 C7 N3 Eu1 132.32(15) . . ?
 C7 N3 N4 104.47(18) . . ?
 N3 N4 C1 120.94(18) . . ?
 C9 N4 N3 111.99(18) . . ?
 C9 N4 C1 126.92(19) . . ?
 N6 N5 Eu1 123.74(13) . . ?
 C12 N5 Eu1 131.49(15) . . ?
 C12 N5 N6 104.66(18) . . ?
 N5 N6 C1 121.21(17) . . ?
 C14 N6 N5 111.82(18) . . ?
 C14 N6 C1 126.96(19) . . ?
 O1 N7 Eu1 56.83(11) . . ?
 O2 N7 Eu1 58.83(11) . . ?
 O2 N7 O1 115.65(19) . . ?
 O3 N7 Eu1 177.80(18) . . ?
 O3 N7 O1 121.8(2) . . ?
 O3 N7 O2 122.6(2) . . ?
 O4 N8 Eu1 58.55(11) . . ?
 O5 N8 Eu1 57.37(11) . . ?
 O5 N8 O4 115.92(19) . . ?
 O6 N8 Eu1 179.3(2) . . ?
 O6 N8 O4 122.1(2) . . ?
 O6 N8 O5 122.0(2) . . ?
 O7 N9 Eu1 58.12(11) . . ?
 O7 N9 O8 115.30(19) . . ?
 O8 N9 Eu1 57.41(11) . . ?
 O9 N9 Eu1 176.01(19) . . ?
 O9 N9 O7 122.5(2) . . ?
 O9 N9 O8 122.2(2) . . ?
 N2 C1 H1 106.9 . . ?
 N4 C1 N2 111.06(18) . . ?
 N4 C1 H1 106.9 . . ?
 N6 C1 N2 112.25(18) . . ?
 N6 C1 N4 112.48(18) . . ?
 N6 C1 H1 106.9 . . ?
 N1 C2 C3 110.3(2) . . ?
 N1 C2 C5 121.6(2) . . ?
 C3 C2 C5 128.1(2) . . ?
 C2 C3 H3 126.4 . . ?
 C4 C3 C2 107.2(2) . . ?
 C4 C3 H3 126.4 . . ?
 N2 C4 C3 105.6(2) . . ?
 N2 C4 C6 123.6(2) . . ?
 C3 C4 C6 130.8(2) . . ?
 C2 C5 H5A 109.5 . . ?
 C2 C5 H5B 109.5 . . ?
 C2 C5 H5C 109.5 . . ?
 H5A C5 H5B 109.5 . . ?
 H5A C5 H5C 109.5 . . ?
 H5B C5 H5C 109.5 . . ?
 C4 C6 H6A 109.5 . . ?
 C4 C6 H6B 109.5 . . ?
 C4 C6 H6C 109.5 . . ?
 H6A C6 H6B 109.5 . . ?
 H6A C6 H6C 109.5 . . ?
 H6B C6 H6C 109.5 . . ?
 N3 C7 C8 111.0(2) . . ?
 N3 C7 C10 122.3(2) . . ?
 C8 C7 C10 126.7(2) . . ?
 C7 C8 H8 126.7 . . ?
 C9 C8 C7 106.7(2) . . ?
 C9 C8 H8 126.7 . . ?
 N4 C9 C11 123.4(2) . . ?
 C8 C9 N4 105.9(2) . . ?
 C8 C9 C11 130.7(2) . . ?
 C7 C10 H10A 109.5 . . ?
 C7 C10 H10B 109.5 . . ?
 C7 C10 H10C 109.5 . . ?
 H10A C10 H10B 109.5 . . ?
 H10A C10 H10C 109.5 . . ?
 H10B C10 H10C 109.5 . . ?
 C9 C11 H11A 109.5 . . ?
 C9 C11 H11B 109.5 . . ?
 C9 C11 H11C 109.5 . . ?
 H11A C11 H11B 109.5 . . ?
 H11A C11 H11C 109.5 . . ?
 H11B C11 H11C 109.5 . . ?
 N5 C12 C13 110.6(2) . . ?
 N5 C12 C15 121.9(2) . . ?
 C13 C12 C15 127.5(2) . . ?
 C12 C13 H13 126.5 . . ?
 C14 C13 C12 106.9(2) . . ?
 C14 C13 H13 126.5 . . ?
 N6 C14 C16 123.1(2) . . ?
 C13 C14 N6 106.0(2) . . ?
 C13 C14 C16 130.9(2) . . ?
 C12 C15 H15A 109.5 . . ?
 C12 C15 H15B 109.5 . . ?
 C12 C15 H15C 109.5 . . ?
 H15A C15 H15B 109.5 . . ?
 H15A C15 H15C 109.5 . . ?
 H15B C15 H15C 109.5 . . ?
 C14 C16 H16A 109.5 . . ?
 C14 C16 H16B 109.5 . . ?
 C14 C16 H16C 109.5 . . ?
 H16A C16 H16B 109.5 . . ?
 H16A C16 H16C 109.5 . . ?
 H16B C16 H16C 109.5 . . ?
 N10 C17 C18 179.2(4) . . ?
 C17 C18 H18A 109.5 . . ?
 C17 C18 H18B 109.5 . . ?
 C17 C18 H18C 109.5 . . ?
 H18A C18 H18B 109.5 . . ?
 H18A C18 H18C 109.5 . . ?
 H18B C18 H18C 109.5 . . ?

_shelx_res_file
;
    ppr4.res created by SHELXL-2014/7

TITL ppr4_a.res in P2(1)/n
REM Old TITL PPR4 in P2(1)/n
REM SHELXT solution in P2(1)/n
REM R1 0.062, Rweak 0.003, Alpha 0.107, Orientation as input
REM Formula found by SHELXT: C27 O10 Eu
CELL 0.71073 10.8259 14.9846 16.4034 90 95.786 90
ZERR 4 0.0006 0.0007 0.0008 0 0.002 0
LATT 1
SYMM 0.5-X,0.5+Y,0.5-Z
SFAC C H Eu N O
UNIT 72 100 4 40 36

L.S. 4
PLAN  1
SIZE 0.1 0.1 0.08
TEMP -123(2)
list 4
MORE -1
BOND $H
fmap 2
acta
OMIT 0 1 1
OMIT 0 0 22
OMIT 0 2 23
OMIT 4 0 20
OMIT 12 9 9
OMIT 2 0 20
OMIT 3 1 21
OMIT 1 1 23
OMIT 2 0 22
OMIT 3 2 22
OMIT 3 0 21
OMIT 9 3 16
OMIT 3 1 20
OMIT 1 1 22
OMIT 4 1 21
OMIT 5 0 19
OMIT 2 2 22
OMIT 3 0 19
OMIT 2 1 22
OMIT 6 5 18
OMIT 2 2 1
OMIT 0 1 5
OMIT 1 0 21
OMIT 1 0 7
OMIT 2 2 3
OMIT 1 0 23
REM <olex2.extras>
REM <HklSrc "%.\\PPR4.hkl">
REM </olex2.extras>

WGHT    0.016400    1.456300
FVAR       0.27603
EU1   3    0.417694    0.337300    0.662022    11.00000    0.01517    0.01963 =
         0.01617    0.00023   -0.00113   -0.00050
O1    5    0.282455    0.409724    0.752709    11.00000    0.02405    0.02419 =
         0.03292   -0.00185    0.00854   -0.00506
O2    5    0.249729    0.268695    0.734036    11.00000    0.02876    0.02228 =
         0.03301    0.00103    0.00747   -0.00209
O3    5    0.141415    0.343283    0.816445    11.00000    0.03312    0.03975 =
         0.03701    0.00349    0.01841   -0.00282
O4    5    0.225482    0.366160    0.571242    11.00000    0.02422    0.03832 =
         0.02410    0.00275   -0.00152    0.00369
O5    5    0.398933    0.385342    0.518766    11.00000    0.02752    0.04159 =
         0.02270    0.00656   -0.00199   -0.00087
O6    5    0.224284    0.407464    0.443379    11.00000    0.04659    0.05273 =
         0.02709    0.00661   -0.01375    0.00743
O7    5    0.363269    0.197950    0.586678    11.00000    0.03176    0.02678 =
         0.02598   -0.00363   -0.00847    0.00128
O8    5    0.488819    0.185406    0.696747    11.00000    0.02430    0.02638 =
         0.03001    0.00001   -0.00895    0.00183
O9    5    0.420876    0.065842    0.631341    11.00000    0.04514    0.02182 =
         0.06418   -0.00809   -0.00752    0.00486
N1    4    0.640846    0.345763    0.627354    11.00000    0.01870    0.02171 =
         0.01803   -0.00031    0.00022    0.00062
N2    4    0.727969    0.402027    0.666474    11.00000    0.01616    0.02413 =
         0.01693    0.00126    0.00150    0.00184
N3    4    0.561809    0.350134    0.795101    11.00000    0.01724    0.02192 =
         0.01506    0.00040   -0.00039   -0.00256
N4    4    0.666422    0.402416    0.802154    11.00000    0.01716    0.02216 =
         0.01598    0.00131   -0.00057   -0.00160
N5    4    0.487534    0.497075    0.677447    11.00000    0.01442    0.02025 =
         0.02303    0.00106   -0.00077    0.00070
N6    4    0.604090    0.522189    0.709955    11.00000    0.01600    0.01814 =
         0.01920    0.00070   -0.00025    0.00021
N7    4    0.221160    0.340504    0.769421    11.00000    0.02082    0.02730 =
         0.02462    0.00399    0.00238   -0.00148
N8    4    0.280988    0.386815    0.508583    11.00000    0.03364    0.02660 =
         0.02288   -0.00100   -0.00758    0.00317
N9    4    0.423728    0.146310    0.638034    11.00000    0.02248    0.02475 =
         0.03194   -0.00255   -0.00004    0.00169
C1    1    0.698022    0.456890    0.734395    11.00000    0.01569    0.02096 =
         0.02153    0.00074    0.00071   -0.00101
AFIX  13
H1    2    0.775088    0.490525    0.754074    11.00000   -1.20000
AFIX   0
C2    1    0.701876    0.301537    0.572624    11.00000    0.02636    0.02799 =
         0.01650    0.00178    0.00292    0.00535
C3    1    0.826395    0.329224    0.577888    11.00000    0.02404    0.04299 =
         0.02430    0.00289    0.00900    0.00890
AFIX  43
H3    2    0.888564    0.307461    0.546073    11.00000   -1.20000
AFIX   0
C4    1    0.841414    0.393441    0.637447    11.00000    0.01597    0.03351 =
         0.02226    0.00705    0.00487    0.00606
C5    1    0.638634    0.233799    0.516462    11.00000    0.03470    0.03732 =
         0.02328   -0.00886    0.00300    0.00473
AFIX 137
H5A   2    0.643242    0.175255    0.543227    11.00000   -1.50000
H5B   2    0.679643    0.230972    0.465922    11.00000   -1.50000
H5C   2    0.551425    0.250621    0.503304    11.00000   -1.50000
AFIX   0
C6    1    0.951744    0.448393    0.666860    11.00000    0.01822    0.04749 =
         0.03354    0.00487    0.00591   -0.00015
AFIX 137
H6A   2    0.933446    0.511551    0.655837    11.00000   -1.50000
H6B   2    1.022798    0.430235    0.638159    11.00000   -1.50000
H6C   2    0.971536    0.439525    0.725924    11.00000   -1.50000
AFIX   0
C7    1    0.566644    0.305776    0.866428    11.00000    0.02124    0.02531 =
         0.01733   -0.00146    0.00316   -0.00073
C8    1    0.673072    0.329117    0.917753    11.00000    0.02500    0.03126 =
         0.01832    0.00274   -0.00177   -0.00035
AFIX  43
H8    2    0.696993    0.306663    0.971177    11.00000   -1.20000
AFIX   0
C9    1    0.735852    0.390517    0.875997    11.00000    0.01890    0.02732 =
         0.01765   -0.00023   -0.00357    0.00021
C10   1    0.467157    0.242334    0.885807    11.00000    0.03092    0.03830 =
         0.02198    0.00817    0.00230   -0.01025
AFIX 137
H10A  2    0.404152    0.274565    0.913094    11.00000   -1.50000
H10B  2    0.503531    0.195214    0.922080    11.00000   -1.50000
H10C  2    0.428554    0.215625    0.834953    11.00000   -1.50000
AFIX   0
C11   1    0.854056    0.439009    0.900120    11.00000    0.02908    0.04502 =
         0.03064    0.00313   -0.00939   -0.01048
AFIX 137
H11A  2    0.917688    0.419094    0.865719    11.00000   -1.50000
H11B  2    0.881668    0.426528    0.957730    11.00000   -1.50000
H11C  2    0.840557    0.503300    0.892776    11.00000   -1.50000
AFIX   0
C12   1    0.426312    0.573860    0.662939    11.00000    0.02220    0.02151 =
         0.02626    0.00323    0.00033    0.00239
C13   1    0.502805    0.646521    0.686719    11.00000    0.02645    0.01940 =
         0.02930    0.00120    0.00146    0.00365
AFIX  43
H13   2    0.480554    0.707820    0.683004    11.00000   -1.20000
AFIX   0
C14   1    0.615100    0.612645    0.716170    11.00000    0.02613    0.01818 =
         0.02150    0.00051    0.00350   -0.00159
C15   1    0.294937    0.576151    0.626455    11.00000    0.02360    0.02621 =
         0.05467    0.00466   -0.00997    0.00491
AFIX 137
H15A  2    0.291684    0.566662    0.567166    11.00000   -1.50000
H15B  2    0.258565    0.634329    0.637241    11.00000   -1.50000
H15C  2    0.247969    0.528971    0.650910    11.00000   -1.50000
AFIX   0
C16   1    0.731429    0.657936    0.749487    11.00000    0.03283    0.02503 =
         0.03166   -0.00298   -0.00171   -0.00790
AFIX 137
H16A  2    0.750996    0.641525    0.807176    11.00000   -1.50000
H16B  2    0.720455    0.722732    0.745036    11.00000   -1.50000
H16C  2    0.799581    0.639433    0.718231    11.00000   -1.50000
AFIX   0

N10   4    0.616543    0.588058    0.941546    11.00000    0.04664    0.07337 =
         0.08661    0.01768   -0.00156   -0.01217
C17   1    0.516586    0.577185    0.916976    11.00000    0.04582    0.03821 =
         0.04106   -0.00313    0.00830    0.00019
C18   1    0.389373    0.563999    0.884689    11.00000    0.04356    0.07062 =
         0.04365   -0.01434   -0.00065   -0.00546
AFIX 137
H18A  2    0.384827    0.516383    0.843541    11.00000   -1.50000
H18B  2    0.356497    0.619431    0.859283    11.00000   -1.50000
H18C  2    0.340127    0.547198    0.929247    11.00000   -1.50000
AFIX   0
HKLF 4

REM  ppr4_a.res in P2(1)/n
REM R1 =  0.0276 for    6803 Fo > 4sig(Fo)  and  0.0354 for all    8022 data
REM    350 parameters refined using      0 restraints

END

WGHT      0.0164      1.4563

REM Highest difference peak  0.524,  deepest hole -0.618,  1-sigma level  0.106
Q1    1   0.7035  0.4022  0.8446  11.00000  0.05    0.52
;
_shelx_res_checksum                5173
_shelx_hkl_file
;
   1   0   0    0.30    0.30
  -1   0   0   -0.10    0.20
  -2   0   0    7.20    1.60
  -2   0   0    7.80    2.00
   2   0   0    9.50    2.30
   2   0   0    4.00    1.20
   2   0   0    3.20    1.80
  -3   0   0   -0.50    0.90
  -3   0   0    0.30    1.10
   3   0   0    0.60    0.90
   3   0   0   -2.20    1.00
   3   0   0    1.40    1.60
  -4   0   0  353.96   14.30
  -4   0   0  349.57   15.20
   4   0   0  339.37   18.90
   4   0   0  363.16   15.80
   4   0   0  356.86   14.80
  -5   0   0   -0.20    1.00
   5   0   0   -0.50    1.10
  -5   0   0   -0.70    1.20
   5   0   0    1.40    2.20
   5   0   0   -0.50    1.10
   6   0   0 3090.69   93.29
  -6   0   0 3083.09   82.89
  -7   0   0   -1.40    0.80
  -7   0   0   -0.10    1.10
   7   0   0    0.90    2.70
   7   0   0   -1.60    1.20
   8   0   0  126.39   19.20
   8   0   0  110.59   15.30
   9   0   0    0.60    3.20
  -9   0   0    0.40    1.80
   9   0   0    1.10    2.60
  10   0   0  224.68   19.10
  10   0   0  219.38   31.90
 -10   0   0  178.68   23.70
  11   0   0    2.00    3.70
  11   0   0    2.50    4.70
 -11   0   0    2.20    3.80
  12   0   0  656.73   47.30
  12   0   0  683.33   39.50
 -13   0   0    0.90    2.40
  13   0   0    1.40    4.00
  13   0   0   -0.60    3.00
  14   0   0  346.97   29.40
  15   0   0    3.30    4.60
  -1  -1   0 3429.06   79.79
   1   1   0 3291.57   79.59
  -1   1   0 3374.96   78.49
  -2  -1   0 1857.91   49.99
   2  -1   0 1854.51   48.90
  -2   1   0 1859.81   48.50
   2   1   0 1907.61   53.29
  -3  -1   0   90.19    6.50
  -3  -1   0   82.39    8.20
   3  -1   0   78.29    5.80
  -3  -1   0   92.89    6.20
   3  -1   0   90.49    7.40
   3  -1   0   95.39    5.60
   3   1   0   91.09    8.70
  -3   1   0   93.29    7.10
   3   1   0   87.89    6.50
  -3   1   0   85.69    5.10
   3   1   0   90.39    6.20
  -4  -1   0 3938.11  104.89
   4  -1   0 3992.10  104.59
   4   1   0 4192.88  106.89
  -4   1   0 3973.50  103.59
  -5  -1   0  357.96   21.20
   5  -1   0  345.77   20.10
   5  -1   0  347.17   15.20
  -5  -1   0  307.37   15.80
  -5  -1   0  311.37   15.20
   5  -1   0  314.17   16.10
   5   1   0  328.77   16.80
  -5   1   0  326.07   15.70
   5   1   0  346.57   16.40
   5   1   0  326.97   21.10
  -5   1   0  316.17   14.00
  -5   1   0  343.77   18.40
   6  -1   0   48.00   10.60
   6  -1   0   47.90    8.30
  -6  -1   0   41.10    7.20
  -6  -1   0   59.69   12.10
  -6  -1   0   41.20    6.90
   6  -1   0   56.79    8.00
  -6   1   0   50.59    8.20
  -6   1   0   56.49   10.20
   6   1   0   42.10    7.30
  -6   1   0   52.29    7.10
   6   1   0   52.69    9.10
   6   1   0   61.99   12.90
   7  -1   0  583.84   26.90
  -7  -1   0  559.74   25.90
   7  -1   0  606.14   32.60
  -7  -1   0  552.64   24.40
  -7  -1   0  594.74   32.20
  -7   1   0  592.04   29.40
  -7   1   0  568.84   23.10
   7   1   0  599.54   27.50
  -7   1   0  618.04   26.20
   7   1   0  595.84   34.20
   8  -1   0  631.14   35.90
   8  -1   0  634.14   29.80
  -8  -1   0  635.34   35.20
  -8   1   0  629.84   32.30
   8   1   0  626.64   30.10
   8   1   0  553.74   35.70
   9  -1   0  153.18   19.30
  -9  -1   0  144.59   20.60
   9  -1   0  131.69   22.10
  -9   1   0  151.08   20.30
   9   1   0  101.39   14.10
   9   1   0  154.18   24.80
  10  -1   0  422.46   27.00
  10  -1   0  448.46   34.10
 -10   1   0  507.85   31.30
  10   1   0  517.35   37.80
  10   1   0  499.95   29.40
  11  -1   0  284.97   37.40
  11  -1   0  248.98   21.20
 -11   1   0  281.87   23.80
  11   1   0  319.27   40.70
  11   1   0  230.08   20.90
  12  -1   0   26.70   12.10
  12  -1   0   25.00    9.30
 -12  -1   0    1.30    2.80
  12   1   0   11.90    7.20
  13  -1   0   64.09   15.40
  13  -1   0   63.19   19.40
  13   1   0   66.59   14.50
  13   1   0   84.79   31.40
  14  -1   0  236.88   28.60
  14   1   0  209.58   26.80
  15  -1   0    2.40    4.00
  15   1   0   -0.30    4.10
   0  -2   0  767.02   21.60
   0   2   0  788.12   21.70
  -1  -2   0  425.96   15.90
  -1  -2   0  412.76   12.90
   1  -2   0  432.36   12.40
  -1  -2   0  426.16   13.40
   1   2   0  416.86   13.30
   1   2   0  425.96   15.90
  -1   2   0  403.66   12.10
   1   2   0  405.46   12.90
  -2  -2   0   69.89    7.00
  -2  -2   0   66.29    4.90
   2  -2   0   78.89    3.50
   2  -2   0   64.79    4.10
  -2  -2   0   69.69    5.20
  -2   2   0   77.79    4.80
   2   2   0   64.79    5.10
   2   2   0   67.39    4.90
  -2   2   0   72.99    3.60
   2   2   0   49.99    6.60
  -2   2   0   72.99    3.00
  -3  -2   0  519.75   23.70
   3  -2   0  540.65   18.30
   3  -2   0  534.25   19.20
  -3  -2   0  495.75   18.40
   3  -2   0  529.25   16.10
  -3   2   0  528.65   15.40
   3   2   0  548.25   19.10
  -3   2   0  534.55   19.50
   3   2   0  511.85   23.60
   3   2   0  527.05   19.30
  -3   2   0  521.55   17.50
  -4  -2   0   58.09   10.00
   4  -2   0   60.59    8.30
   4  -2   0   69.79    7.80
  -4  -2   0   64.99    7.70
  -4  -2   0   74.39    8.90
   4  -2   0   56.79    4.80
   4   2   0   58.19    7.70
  -4   2   0   57.39    4.40
  -4   2   0   61.69    5.70
   4   2   0   61.29    6.10
  -4   2   0   55.59    5.70
   4   2   0   79.09   14.10
  -5  -2   0 1006.00   32.90
   5  -2   0 1004.20   37.00
   5  -2   0  948.81   32.70
  -5  -2   0  997.00   33.90
  -5  -2   0  986.90   40.80
   5  -2   0 1033.70   30.90
   5   2   0  967.90   41.30
  -5   2   0  983.80   29.20
  -5   2   0  979.20   33.80
   5   2   0  928.51   33.70
   5   2   0 1054.39   34.20
  -5   2   0  952.70   31.90
   6  -2   0  210.98   12.40
   6  -2   0  213.08   13.90
   6  -2   0  228.78   17.00
  -6  -2   0  214.28   13.50
  -6  -2   0  225.08   18.60
  -6  -2   0  216.18   14.10
  -6   2   0  218.68   14.60
   6   2   0  210.88   13.90
  -6   2   0  242.38   13.90
  -6   2   0  222.38   11.50
   6   2   0  222.68   14.80
   6   2   0  193.68   18.10
  -7  -2   0 1345.67   54.89
   7  -2   0 1315.27   45.60
  -7  -2   0 1294.97   45.30
   7  -2   0 1363.86   52.39
  -7   2   0 1357.86   47.40
  -7   2   0 1313.97   44.00
  -7   2   0 1317.37   40.20
   7   2   0 1373.56   47.40
   7   2   0 1327.67   56.79
  -8  -2   0   51.79    8.60
   8  -2   0   52.49   12.10
  -8  -2   0   72.59   15.10
   8  -2   0   52.19   10.40
   8   2   0   47.60    9.80
  -8   2   0   60.69   12.20
  -8   2   0   66.19   12.10
   8   2   0   51.09   13.40
   9  -2   0  724.03   34.10
   9  -2   0  697.63   40.00
  -9  -2   0  702.83   40.50
   9   2   0  735.93   35.30
   9   2   0  664.03   42.80
  -9   2   0  742.73   35.40
  10  -2   0   -1.70    2.00
  10  -2   0    1.40    3.70
 -10  -2   0    5.10    4.90
  10   2   0   -0.40    2.40
  10   2   0    1.40    3.20
 -10   2   0    2.80    3.00
 -11  -2   0   12.20    7.50
  11  -2   0    4.80    4.40
  11  -2   0   12.40    5.80
 -11   2   0    8.70    5.60
  11   2   0   11.10    6.00
  11   2   0    2.90    3.80
  12  -2   0  143.09   26.40
  12  -2   0  211.08   26.20
  12   2   0  143.19   25.00
  12   2   0  125.69   25.30
  13  -2   0   66.09   19.60
  13  -2   0   61.69   14.30
  13   2   0   52.69   12.90
  14  -2   0   19.90    7.80
  14   2   0   36.10   12.90
  15  -2   0  291.77   34.50
  15   2   0  257.67   44.40
   0  -3   0   -0.10    0.60
   0  -3   0    0.40    0.50
   0  -3   0    2.20    1.20
   0   3   0    0.40    0.80
   1  -3   0 2323.57   57.49
  -1  -3   0 2240.88   59.49
  -1   3   0 2289.47   57.29
   1   3   0 2295.67   59.69
   2  -3   0  349.07   12.80
   2  -3   0  358.66    9.20
  -2  -3   0  359.26   13.80
  -2  -3   0  359.16   14.20
   2  -3   0  347.57   12.40
  -2  -3   0  368.76   18.00
   2   3   0  344.67   17.50
   2   3   0  374.26   13.90
   2   3   0  338.67   13.90
  -3  -3   0   14.30    4.50
   3  -3   0   22.20    4.00
   3  -3   0   27.40    2.50
  -3  -3   0   23.60    4.40
   3  -3   0   26.40    4.30
  -3  -3   0   20.20    3.70
  -3   3   0   25.10    1.80
   3   3   0   18.10    5.00
  -3   3   0   23.00    2.10
  -3   3   0   21.40    3.40
   3   3   0   36.40    5.40
   3   3   0   24.80    4.60
  -4  -3   0  382.76   22.50
   4  -3   0  400.66   16.60
  -4  -3   0  371.26   16.80
   4  -3   0  388.56   13.80
  -4  -3   0  367.96   17.20
   4  -3   0  410.76   17.50
  -4   3   0  388.86   16.10
   4   3   0  402.46   23.30
   4   3   0  373.16   17.50
   4   3   0  355.36   16.80
  -4   3   0  380.36   14.40
  -4   3   0  397.06   12.60
  -5  -3   0 2167.58   60.79
  -5  -3   0 2135.99   61.69
  -5  -3   0 2311.67   72.69
  -5   3   0 2056.39   58.79
  -5   3   0 2160.88   58.29
   5   3   0 2107.99   62.09
   5   3   0 2198.88   61.79
  -6  -3   0  136.49   10.90
  -6  -3   0  166.78   16.50
   6  -3   0  116.99    8.70
   6  -3   0  141.99   10.90
   6  -3   0  119.99   11.80
  -6   3   0  133.39   10.20
   6   3   0  124.09   11.30
   6   3   0  172.58   23.00
  -6   3   0  150.28   20.60
   7  -3   0 1941.01   66.19
  -7  -3   0 1878.41   60.89
  -7  -3   0 1957.00   60.39
  -7  -3   0 2014.40   72.99
   7  -3   0 2033.00   61.09
  -7   3   0 1960.00   53.59
  -7   3   0 1950.01   58.99
  -7   3   0 2001.90   60.29
   8  -3   0   14.30    5.30
  -8  -3   0    6.40    4.40
  -8  -3   0   13.20    4.70
   8  -3   0   13.00    6.10
  -8   3   0   18.70    6.20
   8   3   0    1.60    2.90
   8   3   0   10.10    5.20
   9  -3   0   56.99   13.20
  -9  -3   0   95.19   19.40
   9  -3   0   65.09   12.10
   9   3   0   60.19   12.50
   9   3   0   58.19   15.20
  -9   3   0   69.79   12.10
 -10  -3   0   18.10    8.90
  10  -3   0   28.20   10.60
  10  -3   0   13.80    6.20
 -10   3   0   18.00    6.40
  10   3   0   16.50    8.90
  10   3   0    9.50    5.20
  11  -3   0  365.16   26.00
 -11  -3   0  512.85   69.19
  11  -3   0  349.67   30.60
  11   3   0  449.36   29.60
  11   3   0  416.96   37.00
 -11   3   0  441.66   27.00
 -12  -3   0   -0.40    1.90
  12  -3   0    7.10    7.00
  12  -3   0    6.40    5.60
  12   3   0    8.80    6.50
 -12   3   0    1.30    2.10
  12   3   0    5.30    7.60
  13  -3   0  369.36   28.40
  13  -3   0  307.37   38.90
  13   3   0  384.56   30.30
  14  -3   0   -1.20    2.20
  14   3   0   -2.10    2.00
  15  -3   0    4.80    5.70
  15   3   0   -2.20    4.30
   0  -4   0 8665.73  201.18
   0   4   0 8679.83  200.98
  -1  -4   0 1025.40   33.70
   1   4   0 1045.90   30.00
   1   4   0 1058.99   33.50
  -2  -4   0  168.48   12.50
  -2  -4   0  168.08    9.20
  -2  -4   0  183.58    9.90
   2   4   0  150.48   11.70
  -2   4   0  176.08    8.40
   2   4   0  183.58    9.90
   3  -4   0 1104.29   31.90
  -3  -4   0 1114.79   34.60
   3  -4   0 1073.09   32.10
  -3  -4   0 1053.19   40.80
  -3  -4   0 1126.69   34.10
   3   4   0 1160.88   34.40
   3   4   0 1064.19   34.40
   3   4   0 1113.19   41.50
   4  -4   0  236.98   11.70
   4  -4   0  209.38    8.80
   4  -4   0  210.18   11.20
   4  -4   0  212.68   11.60
  -4  -4   0  208.78   16.90
  -4  -4   0  206.08   12.70
  -4  -4   0  216.78   18.50
  -4   4   0  205.58    6.90
  -4   4   0  211.58    6.50
   4   4   0  214.08   13.10
   4   4   0  209.38   12.50
  -4   4   0  209.28   11.30
   4   4   0  216.58   17.20
   5  -4   0  628.64   20.10
  -5  -4   0  577.44   31.60
   5  -4   0  561.14   23.00
  -5  -4   0  563.04   24.60
  -5  -4   0  542.45   23.70
   5  -4   0  615.04   24.60
  -5   4   0  588.34   17.10
  -5   4   0  583.44   18.90
   5   4   0  602.54   25.70
   5   4   0  532.85   31.00
  -5   4   0  595.54   23.00
  -6  -4   0 1064.99   39.40
  -6  -4   0 1116.39   39.20
   6  -4   0 1084.19   40.30
  -6  -4   0 1181.38   50.29
   6  -4   0 1159.38   38.70
  -6   4   0 1072.99   36.80
  -6   4   0 1110.19   31.00
  -6   4   0 1129.29   34.10
   6   4   0 1084.89   49.80
   6   4   0 1077.19   40.30
  -7  -4   0  316.27   19.10
  -7  -4   0  369.96   27.40
   7  -4   0  378.36   20.10
   7  -4   0  338.47   21.60
  -7   4   0  324.37   13.90
   7   4   0  344.77   27.40
  -7   4   0  342.57   18.50
  -7   4   0  335.07   16.80
   7   4   0  341.67   20.90
   8  -4   0  138.29   15.60
   8  -4   0  133.69   18.80
  -8  -4   0  126.69   12.20
  -8  -4   0  135.19   20.80
   8   4   0  150.18   18.10
   8   4   0  131.89   20.50
  -8   4   0  123.69   10.70
  -9  -4   0  581.44   39.10
   9  -4   0  630.74   36.20
   9  -4   0  683.83   32.50
  -9   4   0  661.23   29.00
   9   4   0  673.93   34.30
 -10  -4   0   72.09   17.60
  10  -4   0   46.10   10.90
  10  -4   0   49.50   12.90
  10   4   0   37.40    9.90
  10   4   0   54.89   16.20
 -10   4   0   61.39   10.90
  11  -4   0  270.77   21.80
 -11  -4   0  230.68   30.60
  11  -4   0  225.78   30.10
  11   4   0  265.67   22.90
 -11   4   0  241.68   18.10
  11   4   0  299.37   41.10
  12  -4   0  215.28   25.50
  12  -4   0  252.27   34.30
  12   4   0  229.18   28.10
 -12   4   0  244.68   18.80
  12   4   0  255.17   40.10
  13  -4   0   37.40   13.00
  13  -4   0   34.60   10.90
  13   4   0   34.50   11.10
  14  -4   0   88.89   16.90
  14   4   0  123.89   21.30
  15  -4   0  156.98   24.20
  15   4   0  169.78   26.60
   0  -5   0    0.90    1.10
   0  -5   0    1.80    1.70
   0  -5   0    1.10    0.90
   0   5   0    1.10    1.00
   1  -5   0   13.30    3.00
  -1  -5   0   17.50    3.70
   1  -5   0   18.00    2.10
  -1  -5   0   15.50    3.10
  -1  -5   0   10.90    3.80
  -1   5   0   13.80    2.90
   1   5   0   12.10    2.90
   1   5   0    9.20    3.50
  -2  -5   0  953.10   31.00
  -2  -5   0 1044.50   30.70
   2  -5   0  943.71   28.60
  -2  -5   0  964.40   36.70
   2   5   0  997.80   36.50
   2   5   0  970.50   31.00
  -3  -5   0  169.18   10.90
   3  -5   0  172.68    9.50
   3  -5   0  177.08    5.60
  -3  -5   0  171.48   14.60
   3  -5   0  167.88    6.30
  -3  -5   0  159.08   10.20
   3  -5   0  176.98    9.90
   3   5   0  161.88   14.00
   3   5   0  168.68   11.00
   4  -5   0 1195.98   36.60
  -4  -5   0 1081.09   46.30
  -4  -5   0 1098.89   37.80
   4  -5   0 1215.38   36.10
  -4  -5   0 1217.48   39.40
   4  -5   0 1244.98   34.10
   4   5   0 1189.28   47.60
   4   5   0 1251.27   40.00
   5  -5   0  289.57   15.20
   5  -5   0  289.77   14.90
  -5  -5   0  271.97   16.40
   5  -5   0  270.87   14.30
  -5  -5   0  290.47   16.50
  -5  -5   0  305.07   22.90
   5   5   0  266.87   16.60
   5   5   0  252.97   21.20
  -6  -5   0    1.10    2.00
   6  -5   0    2.10    2.50
  -6  -5   0   -0.50    2.00
   6  -5   0    1.30    1.80
  -6  -5   0   -0.30    1.10
   6   5   0    2.80    2.80
  -6   5   0    1.00    1.00
  -6   5   0    0.10    1.10
  -6   5   0    1.20    1.00
   6   5   0    1.00    2.70
  -7  -5   0  268.27   17.70
   7  -5   0  258.97   16.60
   7  -5   0  243.78   17.50
  -7  -5   0  253.97   23.40
  -7   5   0  268.97   12.00
  -7   5   0  259.27   10.60
   7   5   0  253.47   23.90
  -7   5   0  215.58   14.90
   7   5   0  243.08   17.90
  -8  -5   0  959.20   39.60
  -8  -5   0  954.40   50.69
   8  -5   0 1025.70   39.70
   8  -5   0  962.10   42.20
   8   5   0  998.70   42.40
  -8   5   0  996.40   32.20
   8   5   0 1007.70   53.49
   9  -5   0   65.89   13.80
   9  -5   0   59.99   10.90
  -9  -5   0   76.19   18.70
  -9   5   0   76.19    9.70
   9   5   0   60.89   11.50
   9   5   0   48.00   13.60
 -10  -5   0  737.13   47.00
  10  -5   0  778.82   42.00
  10  -5   0  756.82   36.60
  10   5   0  710.43   38.30
 -10   5   0  744.03   29.80
  10   5   0  707.83   48.80
  11  -5   0  173.08   22.10
  11  -5   0  143.09   22.00
 -11  -5   0  149.29   26.00
 -11   5   0  133.79   13.30
  11   5   0  142.69   45.00
  11   5   0  119.89   18.70
  12  -5   0   12.40    7.50
  12  -5   0   10.60    6.30
  12   5   0    4.50    6.60
  12   5   0   14.80    7.10
  13  -5   0   57.29   16.70
  13  -5   0   59.39   13.60
  13   5   0   57.49   15.10
  14  -5   0  202.68   27.50
  14   5   0  191.58   26.90
   0  -6   0 1745.43   47.50
  -1  -6   0  739.63   28.90
  -1  -6   0  703.83   23.00
   1  -6   0  697.13   23.20
   1  -6   0  721.13   22.60
   1  -6   0  727.03   19.50
  -1  -6   0  723.93   24.70
   1   6   0  653.23   26.70
  -1   6   0  684.33   22.80
   1   6   0  723.53   24.40
  -2  -6   0 1633.34   54.09
  -2  -6   0 1604.14   45.40
  -2  -6   0 1650.03   47.10
   2   6   0 1509.05   51.79
   2   6   0 1639.64   47.00
   3  -6   0  125.29    8.80
   3  -6   0  141.89    9.00
  -3  -6   0  152.78   10.40
  -3  -6   0  158.48   11.00
  -3  -6   0  149.29   14.20
  -3   6   0  143.09    9.00
   3   6   0  141.19   10.50
   3   6   0  138.89   13.50
  -4  -6   0  571.94   24.70
   4  -6   0  593.54   18.30
  -4  -6   0  589.54   32.00
   4  -6   0  564.04   22.10
   4  -6   0  567.24   21.80
   4   6   0  544.95   30.60
   4   6   0  544.15   24.30
   5  -6   0   34.00    5.70
  -5  -6   0   27.70    6.30
   5  -6   0   45.40    7.30
   5  -6   0   29.30    5.70
  -5  -6   0   39.60    7.90
  -5  -6   0   41.30   11.70
   5   6   0   51.19    9.70
   5   6   0   39.00   10.80
   6  -6   0  745.23   29.10
  -6  -6   0  798.42   33.40
   6  -6   0  799.42   30.90
  -6  -6   0  840.92   43.50
   6  -6   0  834.52   30.70
  -6  -6   0  805.82   32.90
   6   6   0  750.62   41.80
   6   6   0  765.72   36.70
   7  -6   0    5.50    3.00
  -7  -6   0    2.80    3.90
  -7  -6   0    6.30    3.40
   7  -6   0    4.60    2.90
   7  -6   0    8.90    4.50
   7   6   0   13.70    7.90
   7   6   0    3.70    3.30
  -8  -6   0  347.27   29.50
   8  -6   0  323.87   21.70
  -8  -6   0  328.07   21.30
   8  -6   0  341.87   20.60
   8   6   0  335.27   22.80
   8   6   0  302.47   28.40
  -8   6   0  320.47   10.40
  -9  -6   0   69.89   16.10
   9  -6   0   62.19   12.80
   9  -6   0   63.79   11.50
   9   6   0   51.29   23.20
   9   6   0   44.70   10.30
 -10  -6   0  256.57   36.50
  10  -6   0  167.68   20.50
  10  -6   0  195.48   24.80
  10   6   0  167.08   21.70
  10   6   0  188.48   32.20
  11  -6   0   17.90    7.80
 -11  -6   0   34.00   11.80
  11  -6   0   26.50    9.50
  11   6   0   11.10    7.70
  11   6   0   10.60    7.90
  12  -6   0  570.44   38.60
  12  -6   0  572.64   39.50
  12   6   0  658.93   39.70
  13  -6   0   10.60    6.90
 -13  -6   0    0.10    2.60
  13   6   0    9.10    6.60
  14  -6   0  156.08   23.00
  14   6   0  176.68   28.40
   0  -7   0   -1.00    0.60
   0  -7   0    0.70    1.60
   0  -7   0    2.30    1.60
   0   7   0    1.80    1.70
  -1  -7   0 1455.15   48.90
   1  -7   0 1481.25   42.50
  -1  -7   0 1475.75   43.90
  -1   7   0 1485.15   42.10
   1   7   0 1511.95   43.80
  -2  -7   0  579.44   28.80
  -2  -7   0  606.34   22.70
  -2  -7   0  553.74   23.10
   2  -7   0  604.14   21.80
   2  -7   0  588.34   15.70
   2   7   0  629.54   24.10
   2   7   0  566.84   27.40
  -2   7   0  596.54   21.50
   3  -7   0  182.08   10.70
  -3  -7   0  160.38   15.40
  -3  -7   0  152.18   10.90
  -3  -7   0  188.48   12.70
  -3   7   0  169.38   10.30
   3   7   0  174.78   15.50
   3   7   0  148.19   11.30
  -4  -7   0  846.32   32.00
   4  -7   0  842.72   29.50
  -4  -7   0  806.82   35.30
   4  -7   0  855.61   23.30
  -4  -7   0  970.20   43.40
   4  -7   0  856.31   30.00
   4   7   0  880.31   33.50
   4   7   0  850.01   40.60
   5  -7   0  843.12   30.70
   5  -7   0  841.22   26.50
  -5  -7   0  758.52   31.80
   5  -7   0  800.72   29.60
  -5  -7   0  848.22   43.00
  -5  -7   0  814.72   33.40
   5   7   0  868.21   34.30
   5   7   0  811.02   41.90
   6  -7   0    7.80    3.40
  -6  -7   0    6.80    3.60
  -6  -7   0    4.20    4.20
   6  -7   0    5.40    3.20
   6  -7   0    6.00    3.20
   6   7   0    2.50    2.90
   6   7   0    4.40    3.10
   7  -7   0   52.59    8.50
   7  -7   0   74.99   11.20
   7  -7   0   85.59   17.80
  -7  -7   0   73.59   17.30
  -7  -7   0   69.39   12.00
   7   7   0   45.60   10.30
   7   7   0   86.39   21.80
   8  -7   0  357.46   21.50
  -8  -7   0  344.27   30.40
  -8  -7   0  320.07   21.70
   8  -7   0  351.06   21.80
   8   7   0  342.27   30.90
   8   7   0  316.27   22.70
   9  -7   0    2.10    2.90
  -9  -7   0    1.00    2.70
   9  -7   0   11.30    5.40
   9   7   0    2.50    3.90
   9   7   0    1.30    4.20
  10  -7   0  280.67   23.00
  10  -7   0  299.97   22.00
 -10  -7   0  361.06   44.60
  10   7   0  323.57   25.20
 -11  -7   0  160.58   27.30
  11  -7   0  157.58   23.00
  11  -7   0  156.08   21.50
  11   7   0  156.78   21.20
  12  -7   0    1.50    3.40
 -12  -7   0    0.60    2.60
  12   7   0    2.00    3.80
  13  -7   0  101.49   20.60
  13  -7   0  120.89   20.10
  13   7   0  151.58   24.90
  14  -7   0  177.28   24.70
  14   7   0  224.98   40.00
   0  -8   0  380.96   19.50
   0  -8   0  377.56   14.90
   0  -8   0  382.66   17.50
   0   8   0  375.56   17.00
  -1  -8   0  409.06   18.90
  -1  -8   0  360.66   21.30
  -1  -8   0  415.96   17.10
   1  -8   0  403.66   17.90
   1  -8   0  419.46   14.20
   1  -8   0  402.36   17.60
  -1   8   0  402.36   17.40
   1   8   0  426.26   18.90
   2  -8   0  198.98    9.80
  -2  -8   0  198.58   12.10
  -2  -8   0  201.98   13.00
  -2  -8   0  227.38   17.50
   2  -8   0  207.38   11.90
   2  -8   0  218.38    7.80
   2   8   0  184.98   12.50
   2   8   0  192.08   15.30
  -2   8   0  190.78   11.30
   3  -8   0 1379.96   42.20
  -3  -8   0 1356.26   45.40
  -3  -8   0 1407.76   44.20
  -3  -8   0 1480.45   55.79
   3   8   0 1289.57   51.89
   3   8   0 1410.66   45.80
  -3   8   0 1395.46   41.70
  -4  -8   0  111.79   16.50
   4  -8   0  139.09   10.30
  -4  -8   0  143.49   11.80
  -4  -8   0  153.38   12.40
   4  -8   0  155.18   11.10
   4   8   0  111.09   18.40
   4   8   0  135.89   11.90
   5  -8   0  281.87   16.10
   5  -8   0  258.27   11.30
  -5  -8   0  291.57   17.90
   5  -8   0  269.77   15.30
  -5  -8   0  249.97   22.90
  -5  -8   0  261.07   19.40
   5   8   0  298.07   24.30
   5   8   0  265.87   18.00
   6  -8   0   39.30    8.10
  -6  -8   0   31.00    8.40
  -6  -8   0   36.40   10.70
   6  -8   0   37.10    6.30
   6  -8   0   36.40    7.00
   6   8   0   30.50   10.40
   6   8   0   25.70    7.40
   7  -8   0  213.28   14.30
  -7  -8   0  236.28   18.00
   7  -8   0  221.28   16.90
   7  -8   0  223.88   15.90
  -7  -8   0  209.78   27.60
   7   8   0  220.48   18.10
   7   8   0  227.78   30.50
   8  -8   0  179.98   15.00
  -8  -8   0  253.67   34.40
  -8  -8   0  164.28   22.30
   8  -8   0  156.68   13.70
   8   8   0  156.78   19.90
   9  -8   0  581.64   31.00
  -9  -8   0  627.94   44.50
   9  -8   0  662.33   32.00
   9   8   0  616.14   34.90
  10  -8   0   23.10    8.30
  10  -8   0   26.70    8.70
 -10  -8   0   18.10    9.30
  10   8   0    8.90    5.40
  11  -8   0  148.79   20.70
 -11  -8   0  107.59   21.40
  11  -8   0  131.59   20.00
  11   8   0  164.48   21.90
  12  -8   0   27.10    9.40
  12  -8   0   28.40    9.60
  12   8   0   20.40    8.70
  13  -8   0   68.99   15.10
  13   8   0   61.09   14.70
  14  -8   0   24.70    9.10
  14   8   0   33.10   12.40
   0  -9   0    0.70    1.00
   0  -9   0   -0.20    1.50
   0  -9   0   -0.60    1.10
   0   9   0    0.20    1.30
   1  -9   0  668.93   26.10
  -1  -9   0  670.13   24.20
   1  -9   0  639.44   25.10
   1  -9   0  667.53   21.00
  -1  -9   0  636.14   30.70
  -1  -9   0  641.34   26.40
  -1   9   0  666.23   25.00
   1   9   0  674.43   26.30
  -2  -9   0   28.10    6.00
   2  -9   0   29.40    6.00
  -2  -9   0   25.40    8.10
  -2  -9   0   33.60    6.90
   2  -9   0   31.70    3.00
   2  -9   0   31.70    5.30
   2   9   0   28.30    6.30
  -2   9   0   26.90    5.60
  -3  -9   0    3.30    2.50
   3  -9   0    6.20    1.30
  -3  -9   0    8.00    3.30
  -3  -9   0    2.00    2.60
   3  -9   0   11.50    3.80
   3  -9   0    7.10    1.90
   3   9   0    7.90    3.70
  -3   9   0    5.00    2.80
   3   9   0   15.60    6.30
  -4  -9   0  131.69   11.60
   4  -9   0  121.79   10.40
   4  -9   0  131.29   10.30
  -4  -9   0  190.58   14.30
  -4  -9   0  153.48   22.30
   4   9   0  142.09   19.70
  -5  -9   0  951.10   48.10
   5  -9   0  837.72   32.40
   5  -9   0  855.71   24.30
   5  -9   0  875.31   33.10
   5   9   0  854.61   45.10
   5   9   0  914.61   37.50
  -6  -9   0   38.50   12.90
   6  -9   0   32.10    5.30
  -6  -9   0   21.90    6.70
   6  -9   0   26.80    6.30
   6  -9   0   21.60    5.90
   6   9   0   27.80    7.60
   7  -9   0  612.84   24.90
  -7  -9   0  614.94   31.40
  -7  -9   0  569.24   40.80
   7  -9   0  646.74   29.10
   7   9   0  568.54   31.40
   8  -9   0  131.29   16.70
   8  -9   0  116.39   14.20
   8   9   0  103.79   16.10
  -9  -9   0   40.70   15.40
   9  -9   0   55.39   11.20
   9  -9   0   53.99   11.50
   9   9   0   35.50    9.90
  10  -9   0  104.09   17.90
 -10  -9   0   82.29   22.00
  10  -9   0  110.99   17.10
  10   9   0   95.99   17.10
 -11  -9   0  329.67   44.50
  11  -9   0  307.87   25.80
  11  -9   0  345.07   25.00
  11   9   0  357.36   28.40
  12  -9   0   10.70    6.80
 -12  -9   0    4.90    6.90
  12  -9   0    5.20    4.60
  12   9   0   11.20    7.10
  13  -9   0  215.98   26.90
  13  -9   0  232.08   29.60
  13   9   0  207.28   28.30
   0 -10   0  630.24   26.30
   0 -10   0  648.54   23.00
   0 -10   0  619.84   32.60
   0  10   0  652.83   26.20
  -1 -10   0    0.10    1.60
   1 -10   0    1.20    1.60
   1 -10   0    3.00    1.70
   1 -10   0    3.40    2.90
  -1  10   0    3.80    2.60
   1  10   0    2.30    2.70
   2 -10   0  362.66   18.60
   2 -10   0  378.16   13.50
  -2 -10   0  406.06   21.00
  -2 -10   0  404.36   19.40
   2 -10   0  403.86   17.80
   2  10   0  408.36   20.90
  -2  10   0  395.86   18.70
   3 -10   0  339.37   10.70
   3 -10   0  321.97   13.20
  -3 -10   0  320.07   19.30
   3 -10   0  339.37   17.70
  -3 -10   0  341.07   18.60
  -3 -10   0  351.06   26.10
  -3  10   0  297.77   16.40
   4 -10   0  206.98   14.00
  -4 -10   0  247.68   22.90
   4 -10   0  212.78   14.40
  -4 -10   0  224.38   15.90
   4  10   0  230.78   16.70
   5 -10   0  186.28   13.40
  -5 -10   0  189.28   15.30
  -5 -10   0  233.68   31.20
   5 -10   0  179.68   13.60
   5  10   0  171.78   15.20
  -6 -10   0  603.04   40.50
   6 -10   0  615.34   27.80
  -6 -10   0  600.14   30.60
   6  10   0  559.84   30.40
   7 -10   0   42.40    9.10
  -7 -10   0   42.60    9.80
  -7 -10   0   29.50   10.90
   7 -10   0   36.30    6.70
   7  10   0   50.99   12.10
  -8 -10   0  177.68   23.20
  -8 -10   0  197.58   30.10
   8 -10   0  184.38   13.20
   8 -10   0  175.48   15.40
   8  10   0  165.58   20.20
  -9 -10   0  250.17   37.80
   9 -10   0  256.07   17.70
  -9 -10   0  294.67   35.50
   9 -10   0  251.37   19.50
   9  10   0  237.68   21.90
  10 -10   0   13.70    6.10
  10 -10   0    5.80    4.10
 -10 -10   0   18.60   11.50
  10  10   0    1.00    3.40
  11 -10   0   75.29   14.30
 -11 -10   0   88.69   25.20
  11 -10   0   59.99   13.70
  11  10   0   41.80   12.70
  12 -10   0  159.58   21.80
  12 -10   0  136.49   20.60
  12  10   0  157.58   24.70
  13 -10   0   16.30    7.40
  13  10   0   23.90   12.90
   0 -11   0    8.30    3.40
   0 -11   0   11.20    3.50
   0 -11   0   14.10    5.20
   0  11   0   11.00    3.80
  -1 -11   0  171.38   11.80
   1 -11   0  166.18   12.50
  -1 -11   0  164.18   15.70
  -1 -11   0  168.18   13.20
   1 -11   0  175.78    9.90
   1 -11   0  161.48   13.00
  -1  11   0  156.28   11.80
   1  11   0  181.78   13.30
  -2 -11   0  368.76   26.00
  -2 -11   0  338.07   20.10
   2 -11   0  381.46   14.20
  -2 -11   0  397.06   19.90
   2 -11   0  398.26   20.00
   2 -11   0  361.16   17.90
  -2  11   0  402.26   19.50
  -3 -11   0   11.60    4.80
  -3 -11   0   15.20    7.20
   3 -11   0   16.10    3.80
   3 -11   0   13.70    2.50
   3 -11   0   23.60    6.00
  -3  11   0   14.00    4.70
   3  11   0   17.20    5.90
   4 -11   0  943.71   35.90
  -4 -11   0 1029.90   39.40
  -4 -11   0  993.00   50.39
  -4  11   0 1011.40   36.30
   4  11   0  924.11   39.20
   5 -11   0   30.80    7.20
  -5 -11   0   40.20    9.40
   5 -11   0   28.80    6.90
  -5 -11   0   26.80   10.80
   5  11   0   22.70    7.70
  -6 -11   0  136.99   25.00
   6 -11   0   98.59   13.00
  -6 -11   0   95.89   13.90
   6  11   0   86.99   13.70
  -7 -11   0  108.09   15.10
   7 -11   0  130.09   15.40
  -7 -11   0  123.49   22.80
   7  11   0  121.89   17.60
   8 -11   0  376.86   23.50
  -8 -11   0  365.46   34.80
   8 -11   0  395.56   18.20
  -8 -11   0  347.67   25.10
   8  11   0  396.26   27.70
  -9 -11   0   -0.30    2.10
   9 -11   0    3.20    2.60
  -9 -11   0    0.70    4.60
   9 -11   0    0.90    2.80
   9  11   0   -3.30    1.60
  10 -11   0  413.46   23.90
  10 -11   0  437.26   27.60
  10  11   0  471.15   32.80
 -11 -11   0   -0.20    4.10
  11  11   0    1.40    3.40
 -12 -11   0    2.40    6.40
  12 -11   0    2.10    3.30
  12  11   0    5.50    5.70
  13 -11   0   12.90    7.40
 -13 -11   0   -1.00    3.30
  13  11   0   18.50    8.60
   0 -12   0 1919.81   60.79
   0 -12   0 1907.91   65.19
   0 -12   0 1991.40   55.59
   1 -12   0   64.29    7.60
  -1 -12   0   78.59   10.40
   1 -12   0   75.19   11.70
   1 -12   0   81.79   12.10
  -1 -12   0   81.39   14.60
  -1  12   0   68.39   10.80
   1  12   0   61.79   10.00
   2 -12   0  252.57   16.30
   2 -12   0  252.47   15.30
   2 -12   0  268.57   11.80
  -2 -12   0  263.17   22.40
  -2 -12   0  247.08   16.00
   2  12   0  262.17   17.70
  -2  12   0  267.07   18.10
  -3 -12   0   41.30    8.60
   3 -12   0   23.50    5.90
   3 -12   0   33.80    5.90
   3 -12   0   37.70    4.40
  -3 -12   0   24.60    9.90
   3  12   0   37.20    8.40
  -4 -12   0  117.99   15.80
  -4 -12   0  147.89   24.90
  -4  12   0  106.49   12.50
   4  12   0  116.09   15.20
  -5 -12   0    4.80    5.50
   5 -12   0    5.20    3.70
  -5 -12   0    6.50    4.40
   5  12   0    8.80    4.80
  -6 -12   0  513.35   29.30
   6 -12   0  541.75   27.10
  -6 -12   0  527.55   39.60
   6  12   0  518.15   30.20
  -7 -12   0   -0.90    1.70
  -7 -12   0    0.80    5.50
   7 -12   0    3.20    3.60
   7  12   0    5.90    4.50
  -8 -12   0  115.59   24.00
   8 -12   0  149.09   18.30
  -8 -12   0  146.89   20.50
   8  12   0  100.49   16.60
   9 -12   0    0.20    2.60
  -9 -12   0    0.20    4.00
  -9 -12   0    1.10    2.60
   9  12   0    9.90    5.50
  10 -12   0   31.30    8.70
 -10 -12   0   59.29   19.00
  10  12   0   71.49   16.10
  11 -12   0   37.70   10.40
 -11 -12   0   27.80   14.50
  11  12   0   32.90   11.10
  12 -12   0  333.97   26.30
 -12 -12   0  276.77   41.90
  12  12   0  314.67   37.10
   0 -13   0    9.50    3.50
   0 -13   0   11.90    5.50
   0  13   0    8.20    4.00
  -1 -13   0  521.65   23.60
   1 -13   0  497.95   26.50
   1 -13   0  497.75   20.30
  -1 -13   0  563.34   32.50
  -1  13   0  473.55   23.90
   1  13   0  520.05   25.80
   2 -13   0  279.97   17.20
   2 -13   0  296.67   13.30
  -2 -13   0  314.07   25.30
  -2 -13   0  296.07   18.10
  -2  13   0  286.07   17.70
   2  13   0  280.67   19.00
   3 -13   0   61.49    8.30
  -3 -13   0   53.29   13.80
   3 -13   0   53.49    4.60
  -3 -13   0   64.29   10.60
  -3  13   0   54.39    9.00
   3  13   0   53.29   10.70
  -4 -13   0  287.57   19.90
  -4 -13   0  293.07   27.30
   4  13   0  326.37   21.70
  -4  13   0  304.17   18.50
   5 -13   0  179.68   14.90
  -5 -13   0  153.78   15.20
  -5 -13   0  204.78   30.30
   5  13   0  175.38   21.80
  -6 -13   0   19.70    9.80
  -6 -13   0    3.30    3.50
   6 -13   0    7.20    4.30
   6  13   0    3.20    4.10
   7 -13   0  103.09   15.10
  -7 -13   0   80.59   18.80
  -7 -13   0   95.89   16.40
   7  13   0   82.39   14.60
  -8 -13   0  199.98   19.70
   8 -13   0  187.68   21.80
  -8 -13   0  242.38   35.50
   8  13   0  249.97   22.50
  -9 -13   0    5.50    7.60
   9 -13   0    4.40    4.30
   9  13   0    2.60    4.90
  10 -13   0   68.49   15.50
 -10 -13   0   70.99   22.10
  10  13   0   60.39   14.00
  11 -13   0  126.29   18.90
 -11 -13   0  172.98   34.60
  11  13   0  152.98   23.80
 -12 -13   0    8.10    9.10
  12 -13   0    5.70    4.30
  12  13   0   18.90    8.40
   0 -14   0   22.50    5.70
   0 -14   0   31.80    9.50
   0  14   0   25.80    7.30
   1 -14   0  462.35   19.80
  -1 -14   0  430.36   29.40
  -1 -14   0  494.35   23.20
   1 -14   0  484.75   26.60
  -1  14   0  446.96   23.80
   1  14   0  429.26   24.30
   2 -14   0   32.40    7.70
  -2 -14   0   19.20    8.50
   2 -14   0   24.50    4.80
  -2 -14   0   20.40    6.60
  -2  14   0   17.50    6.00
   2  14   0   25.20    7.00
  -3 -14   0  631.14   30.30
   3 -14   0  655.93   25.40
   3 -14   0  631.24   20.70
  -3 -14   0  591.44   39.10
   3  14   0  622.04   31.70
  -3  14   0  654.13   29.20
   4 -14   0    9.10    2.40
  -4 -14   0    9.30    6.00
  -4 -14   0   12.90    5.40
   4  14   0   11.90    5.80
  -4  14   0   12.80    5.20
  -5 -14   0  229.28   18.90
   5 -14   0  246.38   18.20
  -5 -14   0  184.98   27.20
   5  14   0  261.47   20.70
   6 -14   0    2.70    3.80
  -6 -14   0    2.10    3.10
  -6 -14   0    6.20    7.40
   6  14   0    5.10    4.70
   7 -14   0  173.08   19.70
  -7 -14   0  155.28   27.20
  -7 -14   0  173.88   21.60
   7  14   0  183.28   23.50
  -8 -14   0    4.50    5.30
   8 -14   0    4.80    4.30
  -8 -14   0   -1.20    2.10
   8  14   0    7.30    5.80
   9 -14   0  301.97   22.60
  -9 -14   0  248.38   34.70
   9  14   0  228.58   27.50
 -10 -14   0   -2.10    2.70
  10 -14   0    0.70    2.70
  10  14   0    1.00    3.80
  11 -14   0   49.70   12.90
 -11 -14   0   22.70   14.30
  11  14   0   44.00   15.50
   0 -15   0    1.10    2.30
   0 -15   0    0.60    3.30
   0  15   0    1.10    2.90
  -1 -15   0  445.36   22.60
   1 -15   0  406.16   25.20
   1 -15   0  408.96   19.30
  -1 -15   0  430.06   29.90
   1  15   0  434.76   24.80
  -1  15   0  413.76   23.40
  -2 -15   0   21.60    9.00
  -2 -15   0   17.30    5.90
   2 -15   0    8.30    4.10
   2 -15   0   16.50    4.20
  -2  15   0   20.30    6.30
   2  15   0   10.60    5.40
   3 -15   0   27.00    4.50
  -3 -15   0   12.60    5.40
   3 -15   0   24.00    5.80
  -3 -15   0   26.30   10.00
   3  15   0   20.70    7.70
  -3  15   0   27.10    7.50
   4 -15   0   53.49    4.10
  -4 -15   0   56.99   15.10
  -4 -15   0   70.69   12.60
   4  15   0   52.49   10.90
  -4  15   0   54.29    9.80
  -5 -15   0  372.56   25.10
   5 -15   0  358.36   22.90
  -5 -15   0  342.17   32.90
   5  15   0  345.17   25.00
  -6 -15   0   -4.20    2.00
  -6 -15   0    2.80    3.80
   6 -15   0   -2.10    1.50
   6  15   0    0.90    4.80
  -7 -15   0  379.46   27.70
   7 -15   0  380.76   24.80
   7  15   0  393.46   28.60
  -8 -15   0   68.49   19.60
   8 -15   0   64.99   12.50
   8  15   0   64.09   14.30
  -9 -15   0    8.30    9.50
   9  15   0    5.70    6.00
  10 -15   0   30.10    9.40
 -10 -15   0   67.69   23.20
  10  15   0   34.30   12.50
   0 -16   0  460.95   22.70
   0 -16   0  463.35   30.10
   0  16   0  445.76   25.70
   1 -16   0   93.79    8.90
  -1 -16   0   93.89   18.00
  -1 -16   0   72.39   11.80
   1 -16   0  111.69   16.50
   1  16   0   66.09   11.90
  -1  16   0   85.39   13.60
  -2 -16   0    7.20    6.90
   2 -16   0    2.40    2.80
  -2 -16   0    2.10    3.20
   2 -16   0    7.00    3.30
  -2  16   0    0.10    2.60
   2  16   0    9.40    5.30
   3 -16   0  309.57   13.70
   3 -16   0  292.47   16.70
  -3 -16   0  278.97   20.30
  -3  16   0  306.27   20.30
   3  16   0  336.07   23.30
  -4 -16   0   65.29   12.50
  -4 -16   0   58.29   16.30
   4  16   0   86.39   15.30
  -4  16   0   96.39   14.80
   5 -16   0   66.29   12.90
  -5 -16   0   68.99   13.50
  -5 -16   0   65.69   18.10
   5  16   0   73.19   17.60
  -6 -16   0  235.18   21.50
  -6 -16   0  306.67   42.20
   6 -16   0  281.67   21.00
   6  16   0  298.57   24.50
   7 -16   0   82.59   14.80
  -7 -16   0  100.79   24.40
   7  16   0   83.99   16.50
  -8 -16   0   39.20   14.50
   8 -16   0   47.40   14.20
   8  16   0   62.49   14.30
   9 -16   0  128.79   18.40
  -9 -16   0  163.78   34.60
   9  16   0  125.89   21.80
  10 -16   0   14.20    6.80
 -10 -16   0   10.80    9.80
  10  16   0   15.80    9.20
   0 -17   0   -0.30    1.70
   0 -17   0    7.80    5.60
   0  17   0    3.30    4.10
   1 -17   0    5.10    4.70
   1 -17   0   -0.20    3.20
  -1 -17   0    3.40    5.00
  -1 -17   0    0.80    1.80
  -1  17   0    3.50    3.80
   1  17   0    0.60    3.10
  -2 -17   0  243.68   18.20
   2 -17   0  229.68   13.50
   2 -17   0  243.28   18.00
  -2 -17   0  281.97   26.70
   2  17   0  250.77   20.20
  -2  17   0  249.18   18.80
  -3 -17   0   -1.90    2.70
   3 -17   0   -0.50    1.10
   3 -17   0   -0.70    1.70
  -3 -17   0    1.50    2.60
   3  17   0   -2.00    2.70
  -3  17   0   -3.00    1.80
  -4 -17   0  334.77   24.00
  -4 -17   0  361.16   33.50
   4  17   0  339.67   25.40
  -4  17   0  327.97   22.20
  -5 -17   0   12.40    6.70
   5 -17   0   13.40    5.50
  -5 -17   0    9.20    7.60
   5  17   0    6.40    5.20
  -6 -17   0    3.10    5.50
   6 -17   0    4.90    3.70
   6  17   0    0.10    3.20
  -7 -17   0    1.90    4.60
   7  17   0    7.70    6.30
  -8 -17   0  205.88   36.80
   8 -17   0  186.08   21.90
   8  17   0  237.28   30.30
   9 -17   0    0.40    3.40
  -9 -17   0    2.20    5.40
   0 -18   0  351.46   27.20
   0 -18   0  322.97   19.90
   0  18   0  363.46   24.00
   1 -18   0    2.60    4.30
  -1 -18   0    2.20    2.80
  -1 -18   0    7.70    6.40
   1 -18   0    2.10    3.00
  -1  18   0    4.50    4.40
   1  18   0    0.30    3.40
   2 -18   0   38.40    9.10
   2 -18   0   38.60    6.90
  -2 -18   0   36.90    8.90
  -2 -18   0   17.30    8.70
  -2  18   0   34.70    8.80
   3 -18   0   82.89   10.90
  -3 -18   0   58.89   11.90
  -3 -18   0   72.09   18.20
   3 -18   0   69.79    6.60
  -3  18   0   83.59   13.90
   3  18   0   87.89   16.20
  -4 -18   0   57.69   16.50
  -4 -18   0   77.69   15.30
  -4  18   0   61.99   11.20
   4  18   0   93.19   17.20
   5 -18   0   32.20    9.20
  -5 -18   0   46.60   16.50
   5  18   0   38.00   11.90
  -6 -18   0  213.88   35.50
   6 -18   0  140.49   19.30
   6  18   0  226.68   28.00
   7 -18   0    8.80    5.70
  -7 -18   0    4.20    7.60
   7  18   0    7.80    6.60
   8 -18   0   17.40    6.80
  -8 -18   0   30.20   14.10
   8  18   0   27.30   11.90
   0 -19   0   -0.10    2.90
   0 -19   0   -0.60    1.50
   0  19   0   -0.40    2.10
   1 -19   0  185.28   13.90
  -1 -19   0  194.08   26.80
  -1 -19   0  213.98   17.10
   1 -19   0  204.58   19.10
  -1  19   0  232.78   26.90
   1  19   0  147.49   19.80
   2 -19   0  126.09   10.40
   2 -19   0  138.59   17.40
  -2 -19   0  125.89   17.70
  -2 -19   0  141.49   24.80
   2  19   0  115.69   17.70
   3 -19   0   -0.90    1.50
   3 -19   0    3.60    2.50
  -3 -19   0    0.30    3.60
   3  19   0    7.10    5.50
   4 -19   0   50.69   11.50
  -4 -19   0   58.59   16.60
   4  19   0   69.49   14.20
  -5 -19   0   99.09   24.30
   5 -19   0  101.99   16.70
   5  19   0   80.29   15.80
   6 -19   0    2.80    3.00
  -6 -19   0    0.40    3.60
   6  19   0    1.30    3.30
   7 -19   0   68.69   13.50
  -7 -19   0   98.59   26.00
   7  19   0   90.59   19.30
   0 -20   0   22.40    9.30
   0 -20   0   19.70    6.10
   0  20   0   17.40    6.70
   1 -20   0   67.89   10.70
  -1 -20   0   72.59   16.10
  -1 -20   0   49.40   15.90
   1 -20   0   58.69   12.60
   1  20   0   60.49   12.40
  -1  20   0   55.49   11.50
   2 -20   0    1.30    2.40
   2 -20   0    0.00    1.60
  -2 -20   0    1.30    3.40
   2  20   0   -3.50    1.60
  -2  20   0   -1.80    2.00
  -3 -20   0  347.47   33.20
   3 -20   0  274.47   14.10
   3 -20   0  292.27   16.80
  -3  20   0  300.47   22.50
   3  20   0  268.77   23.10
   4 -20   0    1.50    3.40
  -4 -20   0    5.70    6.30
   4  20   0    0.30    3.30
   5 -20   0   74.29   14.20
  -5 -20   0   23.30   16.50
   5  20   0   85.99   16.80
   0 -21   0    2.00    2.90
   0 -21   0    2.10    3.90
   0  21   0    3.70    3.40
  -1 -21   0  119.69   21.20
   1 -21   0  118.59   24.20
   1 -21   0  141.19   12.70
   1  21   0  142.09   20.50
  -1  21   0  125.69   17.90
   2 -21   0   51.89   10.50
  -2 -21   0   42.70   13.20
  -2  21   0   59.99   12.50
   2  21   0   75.99   15.20
  15   0  -1  161.08   23.90
  14   0  -1    0.30    3.50
 -13   0   1    0.60    2.60
  13   0  -1   14.80    8.00
  13   0  -1    6.80    6.80
  12   0  -1    4.90    4.90
 -12   0   1    0.20    1.90
  12   0  -1    0.90    3.00
  11   0  -1  446.46   36.60
 -11   0   1  518.75   34.60
  11   0  -1  504.55   31.10
 -10   0   1    0.10    1.60
  10   0  -1    1.30    2.40
  10   0  -1    3.20    4.20
   9   0  -1 1025.40   43.20
  -9   0   1 1052.19   48.20
   9   0  -1 1034.10   51.99
   8   0  -1    1.50    2.90
   8   0  -1    4.40    4.00
   8   0  -1   -0.70    1.80
  -8   0   1    0.10    1.10
   7   0  -1   42.70    7.40
   7   0  -1   41.10    8.60
   7   0  -1   27.40    8.00
  -7   0   1   41.00    8.20
  -7   0   1   31.10    5.60
   6   0  -1    1.30    2.20
  -6   0   1    1.70    2.20
   6   0  -1   -0.70    1.70
   6   0  -1    0.70    1.80
  -6   0   1   -0.20    1.20
  -5   0   1 4821.92  127.89
   5   0  -1 5004.50  130.19
   4   0  -1   -1.00    0.80
   4   0  -1   -0.60    1.40
   4   0  -1    1.60    1.80
  -4   0   1    0.80    1.20
  -4   0   1   -1.30    0.60
  -3   0   1 3187.28   83.09
   3   0  -1 3265.97   84.09
  -2   0   1    2.00    1.10
   2   0  -1    3.30    1.70
   2   0  -1    0.10    0.60
  -2   0   1   -0.40    0.60
   1   0  -1  842.42   22.90
  -1   0   1  830.02   22.80
  -1   0  -1 3242.48   75.69
  -2   0  -1    0.00    0.90
   2   0   1   -0.20    0.90
   2   0   1   -0.50    0.60
   3   0   1 1389.06   42.90
   4   0   1   -1.40    1.20
  -4   0  -1    0.50    1.10
  -4   0  -1   -0.40    0.80
   4   0   1    2.20    2.00
  -5   0  -1    5.40    2.80
   5   0   1    4.20    2.30
  -5   0  -1    5.90    2.40
   5   0   1    4.70    3.50
  -6   0  -1    1.30    1.60
   6   0   1   -0.90    1.10
  -6   0  -1    1.50    1.80
   6   0   1   -1.40    1.50
   7   0   1 1468.75   58.59
  -7   0  -1 1483.55   48.30
   7   0   1 1487.15   49.50
  -7   0  -1 1464.75   46.00
   8   0   1   -0.10    2.00
   8   0   1   -2.10    1.20
   9   0   1  522.05   35.30
   9   0   1  544.45   28.70
  -9   0  -1  449.06   29.50
  10   0   1    6.20    4.40
 -10   0  -1    0.40    2.40
  10   0   1   -0.80    2.50
  11   0   1    5.30    4.60
  11   0   1   12.30    8.20
 -11   0  -1    9.80    5.80
  12   0   1    0.60    3.50
 -12   0  -1   -0.50    1.70
  12   0   1   -0.20    3.50
  13   0   1  494.35   68.89
  13   0   1  414.96   30.70
  14   0   1    4.00    4.70
  15   0   1  541.55   38.40
  15  -1  -1   88.09   17.70
  15   1  -1  116.19   22.60
  14  -1  -1    4.00    4.60
  14   1  -1    7.40    5.80
  13  -1  -1  406.36   37.50
  13  -1  -1  414.16   30.60
  13   1  -1  314.17   44.50
  13   1  -1  330.87   27.80
  12  -1  -1   49.00   15.40
  12  -1  -1   44.70   12.80
  12   1  -1   17.50   11.90
  11  -1  -1   71.79   19.30
  11  -1  -1  102.89   17.80
  11   1  -1   43.10   14.00
 -11   1   1   86.39   17.30
  11   1  -1   72.69   14.50
  10  -1  -1  357.16   24.60
  10  -1  -1  406.66   31.70
  10   1  -1  368.46   31.60
 -10   1   1  364.36   26.50
  10   1  -1  402.46   26.40
  -9  -1   1  528.25   33.80
   9  -1  -1  585.54   30.20
   9  -1  -1  480.85   33.50
  -9   1   1  581.04   32.40
   9   1  -1  571.74   30.20
   9   1  -1  529.65   36.40
  -8  -1   1   18.70    6.70
   8  -1  -1   11.70    4.50
   8  -1  -1    7.00    3.90
  -8  -1   1    7.50    4.80
   8  -1  -1   15.00    7.10
   8   1  -1    5.90    4.10
   8   1  -1    7.90    5.30
   8   1  -1    9.50    3.80
  -8   1   1    7.60    4.50
   7  -1  -1 2350.66   69.19
  -7  -1   1 2300.37   67.69
   7  -1  -1 2275.37   76.79
  -7  -1   1 2262.87   76.89
  -7  -1   1 2228.78   65.19
  -7   1   1 2275.67   63.09
   7   1  -1 2292.87   79.69
  -7   1   1 2269.57   72.59
   7   1  -1 2326.37   69.59
  -7   1   1 2257.67   66.79
  -6  -1   1  380.66   24.20
  -6  -1   1  404.16   20.00
   6  -1  -1  425.86   20.80
   6  -1  -1  435.96   19.00
   6  -1  -1  401.66   24.10
  -6  -1   1  436.66   19.20
  -6   1   1  429.86   17.80
   6   1  -1  396.46   25.60
  -6   1   1  433.66   20.00
   6   1  -1  445.66   20.30
   6   1  -1  385.86   20.30
  -6   1   1  408.06   22.60
   5  -1  -1   68.39   10.70
  -5  -1   1   54.59    7.40
  -5  -1   1   55.19   10.90
   5  -1  -1   52.29    6.60
   5  -1  -1   59.69    8.60
  -5  -1   1   50.39    6.90
  -5   1   1   84.89   10.10
   5   1  -1   55.09    7.90
  -5   1   1   56.89    8.80
  -5   1   1   58.49    5.40
   5   1  -1   45.10    9.60
   5   1  -1   53.19    8.30
  -4  -1   1   80.79   10.40
   4  -1  -1   97.39    7.50
  -4  -1   1   97.49    7.10
   4  -1  -1   88.69    6.40
   4  -1  -1   92.49   11.50
  -4  -1   1   95.79    7.50
  -4   1   1   99.69    7.40
   4   1  -1  100.09    7.40
  -4   1   1   86.19    8.20
  -4   1   1   97.99    6.30
   4   1  -1   69.29    9.90
   4   1  -1   90.99    7.60
  -3  -1   1 1018.00   30.30
  -3  -1   1 1044.20   29.70
   3  -1  -1 1014.60   32.70
  -3  -1   1 1000.10   35.20
   3   1  -1 1020.70   35.50
  -3   1   1 1049.70   32.20
  -3   1   1 1045.30   29.90
   2  -1  -1  262.87   11.10
  -2  -1   1  248.88   12.80
   2  -1  -1  246.48   10.70
  -2  -1   1  248.18    9.70
   2  -1  -1  242.48    8.50
  -2   1   1  260.17   10.70
  -2   1   1  258.57    8.40
   2   1  -1  226.98   12.30
  -2   1   1  249.28    9.80
   2   1  -1  241.68   10.10
   1  -1  -1 5845.52  133.29
  -1  -1   1 5706.23  133.19
   1  -1  -1 5892.41  133.69
   1   1  -1 5771.22  133.39
   0  -1  -1    2.50    0.70
   1  -1   1 1078.09   26.90
  -1  -1  -1 1065.59   29.40
  -1   1  -1 1085.89   26.80
   1   1   1 1075.49   29.40
   2  -1   1   28.20    4.30
  -2  -1  -1   24.50    3.90
  -2  -1  -1   25.20    4.80
   2  -1   1   24.80    3.20
  -2   1  -1   25.30    3.00
  -2   1  -1   18.80    3.30
   2   1   1   12.60    2.60
  -2   1  -1   20.00    2.90
   2   1   1   24.50    4.60
  -3  -1  -1  342.37   14.00
   3  -1   1  351.36   13.40
   3  -1   1  333.87   15.60
  -3  -1  -1  334.57   13.60
  -3   1  -1  352.06   15.00
   3   1   1  361.76   14.40
   3   1   1  323.77   17.40
  -3   1  -1  333.57   12.20
  -3   1  -1  336.17   13.00
   4  -1   1 1118.09   38.40
  -4  -1  -1 1132.49   34.60
  -4  -1  -1 1080.79   33.50
  -4  -1  -1 1154.48   40.40
  -4   1  -1 1086.29   31.70
   4   1   1 1083.49   34.50
  -4   1  -1 1154.58   36.80
  -4   1  -1 1131.09   33.40
   4   1   1 1121.29   41.20
  -5  -1  -1 2530.55   76.89
   5   1   1 2597.34   79.49
  -5   1  -1 2584.34   72.99
  -6  -1  -1  151.68   14.40
   6  -1   1  159.18   14.80
   6  -1   1  170.08   12.10
  -6  -1  -1  141.99   11.10
  -6  -1  -1  152.68   10.80
   6   1   1  157.88   12.10
   6   1   1  149.39   19.40
  -6   1  -1  158.38   11.20
  -6   1  -1  152.98   10.00
  -6   1  -1  158.38   13.20
   7  -1   1  252.07   20.20
  -7  -1  -1  235.08   14.60
  -7  -1  -1  213.88   18.40
  -7  -1  -1  229.58   15.20
   7  -1   1  220.28   15.30
  -7   1  -1  235.88   15.10
  -7   1  -1  259.07   18.30
  -7   1  -1  226.68   13.40
   7   1   1  230.68   16.00
   7   1   1  205.38   19.60
   8  -1   1  233.08   21.10
  -8  -1  -1  237.18   20.50
   8  -1   1  235.88   16.90
   8   1   1  212.48   21.30
  -8   1  -1  248.58   16.70
  -8   1  -1  243.48   18.90
   8   1   1  220.38   16.80
   9  -1   1  146.29   17.20
  -9  -1  -1  149.49   20.90
   9  -1   1  153.38   23.40
   9   1   1  112.39   19.10
  -9   1  -1  184.38   22.70
   9   1   1  190.88   21.30
  10  -1   1   41.80   13.00
  10  -1   1   36.20   10.20
 -10  -1  -1   51.19   17.10
 -10   1  -1   44.40   11.80
  10   1   1   22.30    9.70
  10   1   1   36.10    9.40
  11  -1   1  725.53   37.30
  11  -1   1  599.14   42.90
  11   1   1  687.03   37.10
 -11   1  -1  704.03   39.10
  12  -1   1   11.50    8.40
  12  -1   1   35.20   10.90
  12   1   1   34.50   17.40
  12   1   1   20.50   10.60
  13  -1   1  104.59   18.20
  13  -1   1   99.69   22.40
  13   1   1  139.99   22.90
  14  -1   1  114.59   19.90
  14   1   1   77.29   16.20
  15  -1   1   35.30   12.30
  15   1   1   22.50   10.60
  15  -2  -1   19.40    8.60
  15   2  -1   16.40   11.40
  14  -2  -1  274.57   33.20
  14   2  -1  333.77   29.20
  13  -2  -1   -1.60    2.30
  13  -2  -1    2.00    4.30
 -13   2   1    0.00    2.20
  13   2  -1   -1.10    2.60
  12  -2  -1  335.97   31.80
  12  -2  -1  317.67   25.70
  12   2  -1  364.26   35.60
  12   2  -1  355.96   28.00
 -11  -2   1   55.69   13.80
  11  -2  -1   65.89   13.80
  11  -2  -1   83.99   19.10
  11   2  -1   49.99   12.60
  11   2  -1   47.70   14.20
 -11   2   1   54.59   12.40
 -10  -2   1  276.97   25.80
  10  -2  -1  233.18   23.50
  10  -2  -1  242.48   20.00
  10   2  -1  281.87   22.00
  10   2  -1  241.48   33.80
 -10   2   1  264.97   21.20
   9  -2  -1   77.39   14.00
  -9  -2   1   91.69   18.70
   9  -2  -1   56.59   12.70
   9   2  -1   78.99   13.30
   9   2  -1   83.19   21.10
  -9   2   1   87.09   14.80
   8  -2  -1 1035.50   40.50
  -8  -2   1  970.50   37.40
  -8  -2   1  978.40   47.70
   8  -2  -1 1020.20   36.90
   8  -2  -1 1008.60   46.30
   8   2  -1 1015.10   50.79
   8   2  -1  966.30   40.50
  -8   2   1  987.50   41.00
   8   2  -1 1014.20   39.50
  -7  -2   1   46.80    7.90
   7  -2  -1   85.79   10.70
  -7  -2   1   46.90   11.10
   7  -2  -1   67.09   12.50
   7  -2  -1  101.79   13.80
  -7   2   1   96.69   12.90
   7   2  -1   98.69   18.00
  -7   2   1   77.09   11.00
  -7   2   1   75.39    7.00
   7   2  -1   74.79   12.30
   7   2  -1   61.89    9.40
  -6  -2   1 1186.88   38.80
  -6  -2   1 1210.88   48.90
   6  -2  -1 1207.98   40.30
   6  -2  -1 1132.99   44.10
  -6  -2   1 1181.98   40.00
  -6   2   1 1160.58   34.90
   6   2  -1 1153.98   40.80
  -6   2   1 1143.89   38.70
   6   2  -1 1200.08   39.90
   6   2  -1 1077.89   48.00
  -6   2   1 1187.48   41.40
   5  -2  -1  438.66   22.70
  -5  -2   1  551.44   21.40
  -5  -2   1  503.45   27.40
   5  -2  -1  504.05   18.70
  -5  -2   1  502.55   21.50
   5  -2  -1  504.15   21.30
  -5   2   1  489.65   17.60
  -5   2   1  503.15   21.90
   5   2  -1  516.35   28.00
   5   2  -1  469.55   21.60
   5   2  -1  494.05   21.00
  -5   2   1  513.85   20.80
  -4  -2   1    9.10    3.00
  -4  -2   1    4.40    2.40
   4  -2  -1    7.00    2.10
   4  -2  -1    6.80    3.00
   4  -2  -1    4.60    3.00
  -4  -2   1    8.50    4.30
  -4   2   1    9.00    3.30
   4   2  -1    4.90    3.00
   4   2  -1    4.10    2.30
  -4   2   1    9.90    2.90
   4   2  -1    3.30    1.80
  -4   2   1    8.90    2.20
   3  -2  -1  727.13   24.20
  -3  -2   1  755.52   25.10
  -3  -2   1  794.22   25.00
  -3  -2   1  827.92   31.40
   3  -2  -1  790.92   25.60
  -3   2   1  795.82   24.60
   3   2  -1  765.32   25.40
  -3   2   1  799.42   24.20
   3   2  -1  777.42   30.70
   3   2  -1  816.72   25.20
   2  -2  -1  141.69    7.10
   2  -2  -1  146.79    5.40
   2  -2  -1  147.59    7.40
  -2  -2   1  123.29    9.60
  -2  -2   1  145.89    7.50
   2  -2  -1  145.19    6.90
   2   2  -1  158.18    8.00
  -2   2   1  151.08    6.20
   2   2  -1  162.28    7.80
   2   2  -1  137.19    9.90
  -2   2   1  153.58    5.20
   1  -2  -1  166.38    5.20
  -1  -2   1  153.18    6.70
   1  -2  -1  179.98    7.00
  -1  -2   1  160.48    6.80
  -1  -2   1  182.58    9.60
   1   2  -1  157.98    6.80
   1   2  -1  155.58    6.80
  -1   2   1  159.48    6.80
   0  -2   1 4848.61  110.39
   0   2   1 4757.72  112.79
   0   2  -1 4901.81  110.29
   1  -2   1 1757.72   42.30
   1  -2   1 1741.33   42.60
  -1  -2  -1 1747.93   46.50
   1   2   1 1751.52   46.60
  -2  -2  -1 2492.05   73.39
   3  -2   1  177.68    8.60
   3  -2   1  148.59    9.10
  -3  -2  -1  151.08   11.80
  -3  -2  -1  165.38    9.20
  -3  -2  -1  155.28    9.20
   3   2   1  136.19   11.50
  -3   2  -1  171.08    7.10
   3   2   1  129.49    8.60
  -3   2  -1  186.38    8.60
  -3   2  -1  169.28    8.50
  -4  -2  -1 1615.24   53.99
  -4  -2  -1 1617.14   47.10
  -4   2  -1 1682.63   45.20
  -5  -2  -1   -0.60    0.90
   5  -2   1    2.70    1.90
  -5  -2  -1    2.70    2.00
  -5  -2  -1   -1.60    1.00
   5  -2   1    3.70    2.70
   5   2   1    3.20    3.20
   5   2   1    4.30    2.90
  -5   2  -1    6.80    2.30
  -5   2  -1    2.90    2.10
  -5   2  -1    1.00    1.50
   6  -2   1  688.23   32.40
  -6  -2  -1  708.63   27.60
  -6  -2  -1  693.93   28.40
   6  -2   1  701.83   27.80
  -6  -2  -1  685.33   34.50
  -6   2  -1  729.63   27.00
   6   2   1  731.73   29.40
   6   2   1  737.33   37.20
  -6   2  -1  710.33   27.00
  -6   2  -1  680.23   28.70
   7  -2   1  157.78   20.00
  -7  -2  -1  159.88   12.90
   7  -2   1  171.68   13.20
  -7  -2  -1  192.88   17.30
  -7  -2  -1  174.08   21.90
  -7   2  -1  172.18   13.90
  -7   2  -1  154.48   10.30
  -7   2  -1  143.49   13.00
   7   2   1  141.79   19.10
   7   2   1  155.18   13.20
  -8  -2  -1  111.79   11.00
   8  -2   1  132.99   16.80
  -8  -2  -1  135.89   20.60
   8  -2   1  107.99   17.40
  -8   2  -1  124.39   15.90
  -8   2  -1  116.19   14.70
   8   2   1  129.69   16.60
   9  -2   1   27.30    9.40
   9  -2   1   37.10    8.60
  -9  -2  -1   20.80    8.20
   9   2   1   37.70   10.20
   9   2   1   39.80   13.40
  -9   2  -1   36.50    9.70
  10  -2   1  377.06   24.50
 -10  -2  -1  368.76   29.40
  10  -2   1  376.86   30.40
  10   2   1  361.46   32.40
 -10   2  -1  373.66   27.90
  10   2   1  318.87   23.50
  11  -2   1   12.40    7.10
  11  -2   1   10.30    6.40
 -11  -2  -1   11.50    6.40
 -11   2  -1    5.60    4.40
  11   2   1    5.20    5.60
  11   2   1    9.70    6.30
  12  -2   1  276.87   36.10
  12  -2   1  239.58   21.60
  12   2   1  212.68   29.20
  12   2   1  256.27   37.70
  13  -2   1   97.89   18.10
  13  -2   1   85.79   21.50
  13   2   1   84.79   17.40
  14  -2   1   -0.90    2.30
  14   2   1    1.30    4.10
  15  -2   1   43.90   13.70
  15   2   1   84.09   23.80
  15  -3  -1   13.90    8.30
  15   3  -1    3.10    6.80
  14  -3  -1   45.30   14.00
  14   3  -1   43.20   13.60
  13  -3  -1   28.20   10.30
  13  -3  -1   17.60    9.20
  13   3  -1   23.00    9.30
  12  -3  -1   29.20    9.80
  12  -3  -1   52.29   15.70
  12   3  -1   42.40   14.20
  12   3  -1   54.39   13.90
 -11  -3   1    7.00    7.30
  11  -3  -1   11.70    6.70
  11  -3  -1    2.50    3.60
  11   3  -1   -0.50    2.70
  11   3  -1    2.00    4.70
 -11   3   1    3.30    3.00
  10  -3  -1 1405.66   54.39
 -10  -3   1 1421.06   75.29
  10  -3  -1 1329.97   60.79
 -10   3   1 1373.56   52.29
  10   3  -1 1322.87   67.39
  10   3  -1 1439.86   56.39
   9  -3  -1    8.10    4.60
  -9  -3   1    1.10    3.20
   9  -3  -1    6.00    4.90
   9   3  -1    0.80    3.00
   9   3  -1    7.70    5.20
  -9   3   1    0.10    1.80
   8  -3  -1  344.27   21.40
  -8  -3   1  377.66   21.20
   8  -3  -1  435.86   20.70
   8  -3  -1  358.26   25.20
  -8  -3   1  396.36   29.40
   8   3  -1  412.76   23.10
   8   3  -1  422.46   24.50
   8   3  -1  365.06   29.30
  -8   3   1  369.76   21.50
  -7  -3   1  368.16   20.70
  -7  -3   1  396.76   20.50
  -7  -3   1  382.96   27.40
   7  -3  -1  367.96   23.40
   7  -3  -1  362.36   20.40
   7   3  -1  350.66   27.00
  -7   3   1  364.06   19.40
  -7   3   1  378.96   20.10
   7   3  -1  400.76   21.60
  -7   3   1  353.06   15.70
  -6  -3   1  290.97   22.50
   6  -3  -1  284.67   16.70
   6  -3  -1  312.17   19.40
   6  -3  -1  321.37   14.90
  -6  -3   1  292.17   16.60
   6   3  -1  327.07   17.90
  -6   3   1  334.57   17.10
   6   3  -1  299.07   23.10
   6   3  -1  331.17   18.80
   5  -3  -1  160.48    8.80
   5  -3  -1  144.49   10.50
  -5  -3   1  134.39   10.20
  -5  -3   1  155.98   11.20
  -5  -3   1  165.68   15.70
   5  -3  -1  136.49   11.20
   5   3  -1  142.99   10.70
   5   3  -1  127.29   10.60
  -5   3   1  143.49    9.70
  -5   3   1  132.09    9.70
  -5   3   1  142.69    7.40
  -4  -3   1 2080.09   66.39
  -4  -3   1 2081.39   57.29
   4   3  -1 1990.10   65.79
   3  -3  -1   35.40    5.30
   3  -3  -1   28.90    4.90
   3  -3  -1   23.80    2.30
  -3  -3   1   35.60    5.50
   3  -3  -1   35.60    5.30
  -3  -3   1   40.10    8.50
  -3  -3   1   27.00    4.90
  -3   3   1   29.00    2.50
   3   3  -1   31.60    7.70
   3   3  -1   35.40    5.70
   3   3  -1   38.70    6.60
  -3   3   1   30.00    2.00
   2  -3  -1  207.58   10.40
   2  -3  -1  209.38    6.30
  -2  -3   1  197.58   13.10
   2  -3  -1  218.58    9.80
  -2  -3   1  201.38    9.80
  -2   3   1  214.28    9.50
   2   3  -1  203.78    9.70
   2   3  -1  226.28   13.50
   2   3  -1  204.98   10.00
   1  -3  -1   10.40    2.10
   1  -3  -1   12.70    1.70
  -1  -3   1   12.80    3.70
  -1  -3   1   15.60    2.70
  -1  -3   1    9.20    2.20
  -1   3   1   10.80    2.10
   0  -3  -1 1272.07   36.00
   0  -3   1 1287.17   33.80
   0   3  -1 1219.78   33.30
   0   3   1 1262.87   35.80
   1  -3   1 1776.12   45.10
  -1  -3  -1 1815.12   49.80
   1   3   1 1832.72   49.90
  -1   3  -1 1792.72   45.20
  -2  -3  -1  264.77   11.90
   2  -3   1  259.07   10.80
   2  -3   1  263.27    9.60
  -2  -3  -1  266.27   15.00
  -2  -3  -1  253.17   11.30
   2  -3   1  255.27    8.90
   2   3   1  238.88   11.40
   2   3   1  277.37   15.30
  -2   3  -1  259.37    7.20
  -3  -3  -1  111.49    7.80
  -3  -3  -1  106.99   10.40
  -3  -3  -1  111.79    8.00
   3  -3   1  107.39    6.90
   3  -3   1  118.09    6.90
   3   3   1  116.89   14.00
  -3   3  -1  115.89    4.90
  -3   3  -1  119.89    5.70
   3   3   1  119.59    8.40
   4  -3   1  690.53   23.60
   4  -3   1  663.73   25.00
  -4  -3  -1  720.13   32.10
  -4  -3  -1  714.13   25.50
  -4  -3  -1  688.83   25.60
   4   3   1  708.83   26.20
  -4   3  -1  670.63   20.00
  -4   3  -1  689.83   22.10
  -4   3  -1  675.93   23.00
   5  -3   1    3.10    2.10
   5  -3   1    4.10    3.00
  -5  -3  -1    1.20    1.80
  -5  -3  -1    7.50    3.00
  -5  -3  -1    1.90    2.60
  -5   3  -1    1.30    1.70
   5   3   1    3.30    2.30
  -5   3  -1    2.80    1.80
  -5   3  -1    3.40    1.60
   5   3   1    5.10    3.60
   6  -3   1  943.91   38.00
  -6  -3  -1  916.61   33.90
   6  -3   1  960.40   33.70
  -6  -3  -1  935.51   42.70
   6   3   1  927.01   35.60
  -6   3  -1  957.20   32.70
  -6   3  -1  958.20   33.20
   6   3   1  906.51   43.70
  -6   3  -1  910.21   28.60
  -7  -3  -1   47.00    8.90
   7  -3   1   47.80    9.00
  -7  -3  -1   49.20    9.40
  -7  -3  -1   44.40   10.40
   7  -3   1   34.30    8.80
  -7   3  -1   45.80   12.60
  -7   3  -1   41.90    6.30
  -7   3  -1   84.19   14.00
   7   3   1   60.19   16.80
   8  -3   1 1518.65   54.69
  -8  -3  -1 1385.66   59.79
  -8  -3  -1 1395.06   48.80
   8  -3   1 1346.97   55.69
  -8   3  -1 1468.55   48.10
   8   3   1 1244.18   60.59
  -8   3  -1 1424.26   49.10
   8   3   1 1425.56   51.59
  -9  -3  -1    2.80    3.90
   9  -3   1   11.00    5.20
   9  -3   1    4.00    4.40
   9   3   1    2.60    5.00
  -9   3  -1    8.10    4.50
   9   3   1    9.50    5.30
  10  -3   1  302.97   26.80
 -10  -3  -1  379.46   30.70
  10  -3   1  362.36   24.00
  10   3   1  346.37   24.70
 -10   3  -1  357.86   23.20
  10   3   1  368.06   33.20
  11  -3   1    7.00    5.70
  11  -3   1    4.30    4.70
  11   3   1    3.00    4.30
 -11   3  -1    3.20    3.00
  11   3   1    4.70    4.30
  12  -3   1  262.97   22.40
  12  -3   1  244.78   32.90
  12   3   1  263.67   30.70
  12   3   1  252.57   40.70
  13  -3   1    8.80    6.40
  13  -3   1    5.70    5.70
 -13  -3  -1   -0.10    2.40
  13   3   1    0.20    3.70
  14  -3   1  260.07   30.10
  14   3   1  253.37   32.90
  15  -3   1    9.60    6.90
  15   3   1   11.30   11.80
  15  -4  -1   55.29   14.40
  15   4  -1   77.69   19.50
  14  -4  -1  240.48   31.60
  14   4  -1  192.48   26.80
  13  -4  -1    7.50    6.60
  13  -4  -1    7.20    5.70
 -13  -4   1    1.10    2.60
  13   4  -1    9.90    6.60
  12  -4  -1  213.48   28.10
  12  -4  -1  199.28   28.50
  12   4  -1  173.68   33.30
  12   4  -1  205.58   25.10
 -12   4   1  226.78   18.10
  11  -4  -1  125.99   21.70
  11  -4  -1  119.09   17.40
 -11  -4   1  103.29   20.80
  11   4  -1  167.08   23.10
 -11   4   1  129.79   16.60
  11   4  -1  148.19   28.80
 -10  -4   1   17.10    8.60
  10  -4  -1   32.70   10.80
  10  -4  -1   18.00    6.50
 -10   4   1   23.40    6.80
  10   4  -1   15.10    8.80
  10   4  -1   38.80   10.80
   9  -4  -1  684.93   32.60
  -9  -4   1  611.24   40.10
   9  -4  -1  643.74   36.00
   9   4  -1  608.54   32.60
  -9   4   1  613.44   27.90
   9   4  -1  515.85   38.80
  -8  -4   1  901.91   48.00
  -8  -4   1  888.41   36.50
   8  -4  -1  899.91   33.00
   8  -4  -1  915.51   41.60
   8  -4  -1  921.81   37.70
  -8   4   1  919.81   34.00
   8   4  -1  916.41   39.40
   7  -4  -1   21.80    5.10
   7  -4  -1   19.20    6.30
  -7  -4   1   12.30    7.20
   7  -4  -1   11.20    4.50
  -7  -4   1   16.10    4.90
  -7   4   1   16.70    4.60
  -7   4   1   19.40    3.80
   7   4  -1    9.40    4.20
  -7   4   1   13.00    4.30
   7   4  -1   17.20    6.30
   7   4  -1    6.90    5.90
   6  -4  -1 1270.47   44.50
  -6  -4   1 1307.07   54.49
   6  -4  -1 1277.67   42.50
  -6  -4   1 1242.18   42.60
  -6  -4   1 1231.18   43.30
  -6   4   1 1275.17   36.20
  -6   4   1 1248.58   41.50
  -6   4   1 1283.07   37.90
   6   4  -1 1259.27   43.40
   6   4  -1 1285.47   44.60
   5  -4  -1  981.80   33.10
  -5  -4   1  917.11   42.20
  -5  -4   1  940.41   34.00
   5  -4  -1  979.90   28.00
   5  -4  -1  957.70   33.30
   5   4  -1  900.51   41.90
  -5   4   1  969.30   32.50
  -5   4   1  916.11   27.20
  -5   4   1  936.51   25.30
   5   4  -1  967.70   34.00
   5   4  -1  912.51   34.20
   4  -4  -1  223.48   12.30
   4  -4  -1  205.78   11.10
  -4  -4   1  266.57   17.80
  -4  -4   1  231.38   17.90
   4  -4  -1  229.38    8.90
  -4  -4   1  213.48   12.80
   4  -4  -1  224.98   11.80
   4   4  -1  193.58   12.50
   4   4  -1  196.18   12.20
  -3  -4   1  467.25   18.60
  -3  -4   1  458.45   24.10
   3  -4  -1  449.56   14.80
  -3  -4   1  462.95   18.80
   3  -4  -1  450.25   17.30
   3  -4  -1  462.65   17.80
   3  -4  -1  478.45   12.90
   3   4  -1  463.45   18.90
   3   4  -1  458.85   18.40
   3   4  -1  453.45   23.70
   2  -4  -1 2505.85   66.89
  -2  -4   1 2609.64   69.39
   2   4  -1 2497.95   69.09
  -2   4   1 2468.85   66.49
  -1  -4   1  207.58   12.40
  -1  -4   1  200.18    9.30
   1  -4  -1  209.78    7.90
  -1  -4   1  206.18    9.20
   1   4  -1  206.28    9.40
  -1   4   1  192.58    9.10
   0  -4   1 2132.39   56.39
   0   4   1 2237.08   58.79
  -1  -4  -1  468.35   17.40
   1  -4   1  493.45   15.30
  -1  -4  -1  515.75   20.80
   1   4   1  496.35   17.70
  -1   4  -1  499.15   16.30
   1   4   1  509.45   20.50
   2  -4   1  119.99    5.00
  -2  -4  -1  127.09    8.30
   2  -4   1  116.69    6.50
   2  -4   1  126.79    6.50
  -2  -4  -1  120.59   10.40
  -2  -4  -1  118.99    7.70
   2   4   1  114.19    7.90
   2   4   1  133.59   10.90
  -3  -4  -1 1556.34   52.59
  -3  -4  -1 1597.04   45.80
   3   4   1 1588.74   45.80
   3   4   1 1522.95   52.49
  -4  -4  -1 2825.72   83.69
  -4  -4  -1 2689.53   73.29
   4   4   1 2629.14   82.89
  -5  -4  -1  126.59   10.60
   5  -4   1  118.39    9.10
  -5  -4  -1  114.49    9.80
  -5  -4  -1  145.69   19.60
   5  -4   1  133.89   10.50
   5   4   1  115.59   10.30
  -5   4  -1  125.59    7.40
  -5   4  -1  119.39    6.20
  -5   4  -1  112.39    8.60
   5   4   1  139.89   18.20
   6  -4   1 2303.77   68.69
  -6  -4  -1 2218.88   65.99
  -6  -4  -1 2280.37   67.49
  -6  -4  -1 2201.38   77.69
  -6   4  -1 2246.28   63.29
   6   4   1 2256.87   68.09
   6   4   1 2294.67   80.39
  -6   4  -1 2256.17   60.49
   7  -4   1  628.54   27.10
  -7  -4  -1  615.64   36.20
  -7  -4  -1  559.94   26.90
   7  -4   1  645.14   31.40
  -7   4  -1  640.94   24.70
   7   4   1  578.44   36.70
   7   4   1  580.64   28.80
  -7   4  -1  599.44   28.30
   8  -4   1   14.10    6.60
  -8  -4  -1   13.80    4.80
  -8  -4  -1   21.20    9.20
   8  -4   1   12.30    5.30
   8   4   1   15.70    8.00
  -8   4  -1   14.90    4.80
   8   4   1   29.90    8.10
  -8   4  -1   19.30    5.90
   9  -4   1  581.94   29.50
  -9  -4  -1  648.64   40.20
   9  -4   1  527.15   33.40
  -9   4  -1  576.54   26.80
   9   4   1  554.14   40.20
   9   4   1  604.94   32.30
 -10  -4  -1  538.05   38.20
  10  -4   1  529.65   29.60
  10  -4   1  523.75   35.40
 -10   4  -1  528.05   26.70
  10   4   1  471.65   39.00
  10   4   1  589.04   33.10
  11  -4   1   10.50    5.60
 -11  -4  -1   14.70    7.60
  11  -4   1   22.90   10.60
  11   4   1   14.60    6.70
  11   4   1   10.70    8.30
 -11   4  -1   21.10    6.60
  12  -4   1  283.57   36.90
  12  -4   1  262.57   22.60
 -12   4  -1  294.17   20.80
  12   4   1  339.87   48.10
  12   4   1  316.67   26.20
  13  -4   1   28.00    9.50
  13  -4   1   44.00   16.20
  13   4   1   22.30    9.40
  14  -4   1    3.30    4.20
  14   4   1   -1.50    2.70
  15  -4   1  154.88   23.90
  15   4   1  104.19   19.50
  15  -5  -1  102.79   20.80
  15   5  -1  101.29   20.60
  14  -5  -1   43.10   12.10
  14   5  -1   38.70   12.00
  13  -5  -1  298.37   38.30
  13  -5  -1  307.17   26.00
  13   5  -1  324.97   28.30
  12  -5  -1   39.80   13.30
  12   5  -1   23.10    9.30
  12   5  -1   38.40   16.10
  11  -5  -1  141.29   18.90
 -11  -5   1  126.99   22.00
  11  -5  -1  146.19   23.00
 -11   5   1  159.48   15.60
  11   5  -1  164.38   35.80
  11   5  -1  140.59   21.30
  10  -5  -1  165.48   21.20
  10  -5  -1  186.38   24.00
 -10  -5   1  137.69   23.20
 -10   5   1  147.59   11.70
  10   5  -1  177.08   22.00
  10   5  -1  154.38   28.10
   9  -5  -1  570.34   33.00
  -9  -5   1  590.94   40.30
   9  -5  -1  589.84   30.40
   9   5  -1  536.05   39.70
  -9   5   1  590.94   24.00
   9   5  -1  588.54   32.40
   8  -5  -1    9.50    4.50
  -8  -5   1   10.80    5.40
   8  -5  -1    6.50    4.00
  -8  -5   1    3.80    5.10
   8   5  -1    3.00    3.50
  -8   5   1    6.60    2.70
   8   5  -1    3.30    3.80
   7  -5  -1 1126.29   35.10
   7  -5  -1 1114.29   40.80
  -7  -5   1 1128.49   53.39
  -7  -5   1 1144.39   41.60
   7  -5  -1 1094.09   42.40
  -7   5   1 1072.29   31.90
   7   5  -1 1096.39   43.00
   7   5  -1 1092.29   41.80
  -7   5   1 1101.79   30.00
  -7   5   1 1076.79   39.40
   7   5  -1 1045.40   52.49
  -6  -5   1    8.30    5.10
  -6  -5   1    7.80    3.60
   6  -5  -1    6.10    3.20
  -6  -5   1    2.10    2.50
   6  -5  -1    2.70    1.80
   6  -5  -1    7.90    3.20
   6  -5  -1    4.10    2.80
  -6   5   1    6.30    1.70
   6   5  -1    7.20    3.50
   6   5  -1    8.20    5.70
   6   5  -1    3.00    2.80
   5  -5  -1  358.26   17.20
   5  -5  -1  370.56   17.20
   5  -5  -1  387.36   13.70
  -5  -5   1  356.96   18.70
  -5  -5   1  347.67   25.10
  -5  -5   1  362.36   19.10
   5  -5  -1  350.86   17.60
   5   5  -1  352.16   18.70
   5   5  -1  381.26   20.00
   5   5  -1  350.56   24.90
  -4  -5   1  450.15   20.00
   4  -5  -1  446.56   13.40
  -4  -5   1  436.46   19.90
   4  -5  -1  423.46   18.50
   4  -5  -1  430.56   18.20
   4  -5  -1  426.76   16.00
  -4  -5   1  449.66   26.70
   4   5  -1  429.76   20.10
   4   5  -1  377.16   24.30
  -3  -5   1 1086.29   34.40
  -3  -5   1 1064.59   34.60
  -3  -5   1 1125.49   43.10
   3  -5  -1 1071.89   33.40
   3  -5  -1 1090.09   33.00
   3   5  -1 1085.59   34.80
   3   5  -1 1049.59   41.40
   3   5  -1 1095.19   34.20
  -2  -5   1  206.78   10.80
   2  -5  -1  199.48   10.20
  -2  -5   1  203.78   11.10
  -2  -5   1  207.08   14.90
   2   5  -1  197.58   10.90
  -2   5   1  196.68   10.10
   2   5  -1  216.68   14.60
   2   5  -1  191.08   10.30
  -1  -5   1 4578.64  114.39
   1  -5  -1 4596.14  114.49
   1   5  -1 4707.93  114.79
  -1   5   1 4509.65  113.69
   0  -5  -1   32.30    5.20
   0  -5   1   31.40    3.80
   0  -5  -1   33.70    5.00
   0  -5   1   40.70    5.60
   0   5  -1   28.30    2.70
   0   5   1   37.60    5.30
   0   5  -1   35.20    4.60
   0   5   1   29.60    4.40
   1  -5   1  820.42   23.90
  -1  -5  -1  829.02   26.60
  -1  -5  -1  783.12   29.60
   1   5   1  829.32   26.30
  -1   5  -1  821.22   23.60
   1   5   1  790.62   29.20
   2  -5   1  622.84   16.00
  -2  -5  -1  561.54   21.90
  -2  -5  -1  588.14   26.80
  -2  -5  -1  624.44   21.70
   2   5   1  607.14   22.50
   2   5   1  591.74   26.60
  -2   5  -1  607.24   19.20
  -3  -5  -1  307.77   19.60
   3  -5   1  268.47   12.30
  -3  -5  -1  301.87   15.30
  -3  -5  -1  286.27   14.30
   3  -5   1  268.47   10.00
   3  -5   1  274.67   12.10
   3   5   1  292.87   15.10
   3   5   1  276.57   18.70
   4  -5   1  172.18    9.40
  -4  -5  -1  193.48   12.60
   4  -5   1  172.88   10.20
  -4  -5  -1  209.38   17.30
   4  -5   1  175.88    9.90
  -4  -5  -1  149.39   11.10
   4   5   1  204.78   13.10
   4   5   1  144.59   14.70
  -5  -5  -1 4267.97  116.19
   5   5   1 4245.38  124.79
  -6  -5  -1   27.20    6.00
  -6  -5  -1   54.89   13.70
   6  -5   1   37.70    7.70
   6  -5   1   51.99    8.80
  -6  -5  -1   46.10    8.30
   6   5   1   50.99   12.50
  -6   5  -1   49.90    7.80
  -6   5  -1   40.70    3.80
  -6   5  -1   41.30    3.30
   6   5   1   50.99    9.40
   7  -5   1  386.16   22.70
   7  -5   1  375.96   20.10
  -7  -5  -1  363.26   21.10
  -7  -5  -1  380.66   28.70
  -7   5  -1  342.17   18.80
   7   5   1  347.97   21.80
   7   5   1  402.96   30.50
  -7   5  -1  412.66   16.00
   8  -5   1  130.69   17.90
  -8  -5  -1  126.29   12.80
  -8  -5  -1   93.19   16.20
   8  -5   1  152.28   13.20
   8   5   1  150.48   25.10
  -8   5  -1  138.79    9.60
   8   5   1  117.69   15.60
  -8   5  -1  135.19   15.70
   9  -5   1   72.29   14.60
   9  -5   1  116.99   16.60
  -9  -5  -1   86.69   18.20
  -9   5  -1   99.99    8.90
   9   5   1   99.69   16.00
   9   5   1  120.49   25.00
  10  -5   1   16.40    6.50
  10  -5   1   30.00    9.90
 -10  -5  -1   34.00   12.60
 -10   5  -1   26.00    6.80
  10   5   1   20.20   10.20
  10   5   1   31.40    9.60
 -11  -5  -1  591.64   42.60
  11  -5   1  513.75   30.80
  11  -5   1  559.14   37.80
  11   5   1  576.44   35.00
 -11   5  -1  538.85   25.70
  12  -5   1   47.00   12.00
  12  -5   1   51.69   15.70
  12   5   1   14.80   10.90
  12   5   1   45.70   13.20
  13  -5   1   86.59   19.70
  13  -5   1  116.19   18.70
  13   5   1  110.59   20.70
  14  -5   1   23.50    9.30
  14   5   1   37.60   12.60
  14  -6  -1   14.70    7.80
  14   6  -1   15.10    8.00
  13  -6  -1   -0.30    2.60
  13  -6  -1    2.50    4.40
 -13  -6   1   -0.50    2.60
  13   6  -1   -2.60    2.10
  12  -6  -1   24.00    9.80
  12  -6  -1   16.10    9.60
  12   6  -1   24.70   10.10
  11  -6  -1  382.46   29.30
 -11  -6   1  381.16   35.20
  11  -6  -1  336.87   25.10
  11   6  -1  347.57   45.40
  10  -6  -1    3.60    4.10
  10  -6  -1   -0.30    3.00
 -10  -6   1   -1.80    1.70
  10   6  -1    3.40    6.00
  10   6  -1   -1.20    1.90
   9  -6  -1  499.15   27.40
  -9  -6   1  461.95   36.40
   9  -6  -1  475.85   28.90
   9   6  -1  487.75   29.50
   9   6  -1  430.76   40.80
   8  -6  -1    6.50    3.70
   8  -6  -1    0.70    2.70
  -8  -6   1    1.70    3.40
   8   6  -1    6.60    4.50
   8   6  -1   11.50    5.40
  -7  -6   1    5.10    4.50
  -7  -6   1    7.50    4.10
   7  -6  -1    9.10    4.00
   7  -6  -1   11.20    4.60
   7  -6  -1    2.80    2.00
   7   6  -1    0.20    1.80
   7   6  -1    3.90    4.70
  -6  -6   1   50.19    9.30
  -6  -6   1   47.60   11.30
   6  -6  -1   43.10    8.80
   6  -6  -1   47.80    8.80
  -6  -6   1   47.80    8.70
   6  -6  -1   40.60    7.40
   6   6  -1   46.80    8.10
   6   6  -1   38.00   11.10
   5  -6  -1  743.83   21.60
  -5  -6   1  769.82   30.30
  -5  -6   1  729.33   30.20
  -5  -6   1  680.23   37.80
   5  -6  -1  744.93   25.70
   5  -6  -1  742.13   28.60
   5  -6  -1  757.22   28.10
   5   6  -1  736.83   29.90
   5   6  -1  756.12   31.00
   5   6  -1  716.83   38.00
  -4  -6   1   97.49   19.30
   4  -6  -1   89.89    7.70
  -4  -6   1   98.59   11.90
   4  -6  -1   78.69    4.00
  -4  -6   1   92.49   11.30
   4  -6  -1   83.29    5.40
   4  -6  -1   94.69    8.20
   4   6  -1   74.79    9.70
   4   6  -1   68.49    9.00
   4   6  -1   95.19   16.20
  -3  -6   1  988.20   33.50
  -3  -6   1 1062.99   34.70
   3  -6  -1 1024.00   32.50
  -3  -6   1 1042.90   42.70
   3   6  -1 1021.30   34.40
   3   6  -1  977.40   40.80
   3   6  -1 1005.00   33.50
  -3   6   1 1080.89   32.80
  -2  -6   1  205.58   15.50
  -2  -6   1  191.18   11.30
  -2  -6   1  203.28   11.20
   2  -6  -1  186.78   10.60
   2  -6  -1  209.28    7.40
  -2   6   1  197.18   10.70
   2   6  -1  201.28   11.60
  -1  -6   1  201.18   10.80
   1  -6  -1  214.18   11.10
  -1  -6   1  211.98   10.40
   1  -6  -1  204.08   10.00
  -1  -6   1  210.38   14.20
   1   6  -1  206.58    9.90
   1   6  -1  200.78   10.70
  -1   6   1  194.88   10.50
   0  -6   1  315.17   12.00
   0  -6  -1  322.77   14.30
   0  -6  -1  304.27   15.30
   0  -6   1  323.27   15.90
   0  -6   1  312.97   13.30
   0   6   1  305.77   14.00
   0   6  -1  313.07   13.10
   0   6   1  296.37   13.80
  -1  -6  -1 2237.08   60.29
  -2  -6  -1   74.49    9.20
  -2  -6  -1   54.19    7.10
  -2  -6  -1   87.09   13.10
   2  -6   1   57.19    3.30
   2  -6   1   57.59    5.10
  -2   6  -1   61.49    5.10
   2   6   1   61.79    8.40
   2   6   1   56.89    9.20
  -3  -6  -1 2159.48   69.69
  -3  -6  -1 2179.08   61.39
   3   6   1 2084.09   68.99
   4  -6   1   51.29    6.80
  -4  -6  -1   45.20    7.50
  -4  -6  -1   80.69   11.10
   4  -6   1   53.49    4.70
  -4  -6  -1   58.49   11.00
   4  -6   1   55.59    6.90
   4   6   1   71.29   14.10
   4   6   1   47.40    7.90
  -5  -6  -1   48.00   11.90
  -5  -6  -1   39.30    7.30
   5  -6   1   36.70    6.60
   5  -6   1   39.50    6.50
  -5  -6  -1   30.80    7.00
   5  -6   1   38.40    6.60
   5   6   1   31.00    9.80
   5   6   1   38.30    7.60
  -6  -6  -1    1.20    2.80
  -6  -6  -1    3.60    2.60
   6  -6   1    5.40    3.00
   6  -6   1    4.90    2.90
  -6  -6  -1    2.20    2.50
   6  -6   1    5.40    2.60
   6   6   1    1.80    2.60
   6   6   1    1.60    2.70
  -7  -6  -1  397.36   22.60
  -7  -6  -1  390.66   29.90
   7  -6   1  399.76   21.00
   7  -6   1  429.56   23.10
   7  -6   1  360.36   19.10
   7   6   1  398.96   31.20
   7   6   1  387.96   23.30
  -8  -6  -1    9.80    5.80
   8  -6   1   18.60    6.40
  -8  -6  -1   18.40    6.80
   8  -6   1   21.80    6.70
   8   6   1    4.40    4.80
  -8   6  -1   12.20    2.60
   8   6   1    6.50    4.40
   9  -6   1  264.67   21.50
   9  -6   1  316.07   20.80
  -9  -6  -1  291.07   28.20
   9   6   1  252.97   47.40
  -9   6  -1  296.57   13.40
   9   6   1  291.07   22.30
 -10  -6  -1   13.00    8.30
  10  -6   1    7.30    5.40
  10  -6   1    6.30    4.50
  10   6   1   -1.50    2.50
  10   6   1    4.50    5.40
  11  -6   1    1.10    3.30
 -11  -6  -1   -1.30    2.30
  11  -6   1    0.60    3.40
  11   6   1   -0.80    2.90
  11   6   1   -2.20    2.40
  12  -6   1   23.00    9.80
  12  -6   1   12.30    7.20
  12   6   1   -0.60    3.10
  13  -6   1  294.27   29.80
  13  -6   1  310.27   25.60
  13   6   1  344.67   29.10
  14  -6   1    1.60    3.80
  14   6   1    0.30    3.40
  14  -7  -1   40.50   11.60
  14   7  -1   11.20    7.50
  13  -7  -1  167.38   27.10
  13  -7  -1  170.48   23.40
  13   7  -1  144.09   22.60
  12  -7  -1   10.80    7.40
 -12  -7   1    0.00    2.20
  12  -7  -1   10.50    6.50
  12   7  -1    7.90    6.20
 -11  -7   1  133.59   29.10
  11  -7  -1   88.69   17.00
  11  -7  -1  117.69   18.00
  11   7  -1  109.79   17.50
 -10  -7   1  352.96   33.60
  10  -7  -1  359.46   25.70
  10  -7  -1  326.37   23.40
  10   7  -1  354.16   26.50
  -9  -7   1  178.18   29.20
   9  -7  -1  202.38   16.90
   9  -7  -1  165.68   16.10
   9   7  -1  165.48   22.60
   9   7  -1  198.28   31.60
   8  -7  -1   92.69   13.70
  -8  -7   1  140.59   13.80
  -8  -7   1  130.49   24.40
   8  -7  -1  144.39   17.70
   8   7  -1  138.09   18.70
   8   7  -1  168.18   28.30
   7  -7  -1  290.77   20.10
   7  -7  -1  284.77   18.40
  -7  -7   1  328.17   20.50
   7  -7  -1  304.67   18.00
  -7  -7   1  329.97   28.30
   7   7  -1  294.67   20.70
   6  -7  -1   84.69    5.90
  -6  -7   1   72.49   10.60
  -6  -7   1   81.59   14.50
   6  -7  -1   86.49   11.70
   6  -7  -1   88.49   12.00
   6  -7  -1   87.09    8.00
   6   7  -1   89.89   17.40
   6   7  -1  104.89   14.60
   5  -7  -1  494.35   18.20
  -5  -7   1  475.15   23.50
   5  -7  -1  483.55   21.70
  -5  -7   1  565.84   34.10
  -5  -7   1  464.25   23.60
   5  -7  -1  472.55   22.10
   5  -7  -1  502.35   15.10
   5   7  -1  522.45   32.20
   5   7  -1  491.95   24.60
   4  -7  -1 1356.76   42.70
   4  -7  -1 1310.07   33.90
  -4  -7   1 1313.27   44.40
   4  -7  -1 1343.27   41.90
  -4  -7   1 1316.37   54.69
  -4  -7   1 1410.86   44.90
   4   7  -1 1361.26   45.00
   4   7  -1 1389.16   54.39
  -3  -7   1 1419.46   44.90
   3  -7  -1 1428.86   43.00
  -3  -7   1 1453.85   44.60
  -3  -7   1 1499.15   55.29
   3   7  -1 1378.66   44.70
   3   7  -1 1383.86   52.39
  -3   7   1 1479.95   42.90
  -2  -7   1    8.70    4.40
   2  -7  -1   26.70    5.20
   2  -7  -1   17.90    3.00
  -2  -7   1   15.00    4.00
  -2  -7   1   15.20    4.50
  -2   7   1   18.20    4.30
   2   7  -1   14.30    4.00
  -1  -7   1 1273.77   36.90
  -1  -7   1 1290.67   44.60
   1  -7  -1 1224.78   36.70
   1  -7  -1 1247.88   38.10
  -1  -7   1 1217.48   37.80
  -1   7   1 1265.27   37.70
   1   7  -1 1254.67   37.70
   0  -7  -1 1096.99   36.20
   0  -7   1 1053.99   32.60
   0  -7   1 1036.30   30.30
   0  -7  -1 1080.89   30.80
   0  -7   1 1102.39   36.90
   0  -7  -1 1063.99   34.00
   0   7   1 1045.00   33.50
   0   7  -1 1020.20   32.00
  -1  -7  -1  805.02   28.60
   1  -7   1  807.82   26.00
  -1  -7  -1  788.92   32.20
   1  -7   1  827.02   23.00
  -1  -7  -1  812.42   26.50
   1   7   1  772.12   30.60
   1   7   1  798.72   28.30
  -1   7  -1  828.92   25.90
   2  -7   1  545.55   15.90
   2  -7   1  556.84   20.30
  -2  -7  -1  579.34   22.20
  -2  -7  -1  565.14   23.40
  -2  -7  -1  584.74   28.60
  -2   7  -1  598.54   20.50
   2   7   1  547.05   23.00
   2   7   1  577.24   27.70
  -3  -7  -1  566.24   23.40
  -3  -7  -1  584.34   30.60
  -3  -7  -1  577.34   24.60
   3  -7   1  530.85   20.40
   3  -7   1  582.64   16.00
   3   7   1  526.45   28.90
  -3   7  -1  535.85   20.30
   3   7   1  573.54   24.50
   4  -7   1   48.10    7.00
  -4  -7  -1   56.89    9.60
   4  -7   1   47.60    6.90
   4  -7   1   44.50    4.00
  -4  -7  -1   48.30   10.00
  -4  -7  -1   42.00   10.30
   4   7   1   42.00    9.50
   4   7   1   33.40    7.00
  -5  -7  -1  873.41   35.60
  -5  -7  -1  930.71   35.40
   5  -7   1  900.21   29.00
   5  -7   1  884.81   31.10
   5  -7   1  951.50   32.20
  -5  -7  -1  914.61   45.00
   5   7   1  869.51   44.30
   5   7   1  906.21   36.30
  -6  -7  -1  113.49   18.30
   6  -7   1  108.19   12.30
  -6  -7  -1  141.49   18.60
   6  -7   1   92.59    8.80
   6  -7   1  104.19   11.90
   6   7   1  107.49   14.80
   6   7   1   81.59   16.00
  -7  -7  -1  148.89   13.70
  -7  -7  -1  185.78   28.00
   7  -7   1  148.29   11.60
   7  -7   1  142.89   12.40
   7  -7   1  145.19   12.20
   7   7   1  152.28   18.80
   7   7   1  150.48   23.20
  -8  -7  -1   78.29   23.30
   8  -7   1   65.29   11.00
   8  -7   1   61.99   11.60
  -8  -7  -1   49.99   10.10
   8   7   1   60.79   15.60
   8   7   1   46.50   10.10
   9  -7   1   27.30    7.50
   9  -7   1   26.90    8.40
  -9  -7  -1   52.69   17.00
   9   7   1   28.60    9.50
   9   7   1   34.10   12.90
  10  -7   1  114.79   15.90
 -10  -7  -1   96.29   21.50
  10  -7   1  133.89   20.10
  10   7   1  118.49   17.60
  11  -7   1  528.05   31.30
  11  -7   1  577.64   36.70
 -11  -7  -1  572.44   44.10
  11   7   1  551.34   39.20
  12  -7   1  123.79   22.70
  12  -7   1  158.68   23.30
  12   7   1  127.49   20.20
  13  -7   1   38.40   10.80
  13  -7   1   25.10   10.70
  13   7   1   37.00   13.10
  14  -7   1  167.58   23.50
  14  -8  -1  177.18   25.30
  14   8  -1  218.98   30.10
  13  -8  -1    9.60    6.70
 -13  -8   1    0.00    3.20
  13   8  -1   13.70    8.80
  12  -8  -1  171.18   23.70
  12  -8  -1  147.69   22.40
  12   8  -1  133.09   20.80
  11  -8  -1   12.30    5.70
 -11  -8   1   22.90   11.10
  11  -8  -1   18.20    7.40
  11   8  -1   28.20   10.20
  10  -8  -1    2.10    3.70
 -10  -8   1    7.80    6.50
  10  -8  -1   12.70    5.60
  10   8  -1   17.20    7.40
  -9  -8   1   78.89   20.20
   9  -8  -1   67.59   13.20
   9  -8  -1   36.50    9.20
   9   8  -1   85.39   16.20
   8  -8  -1  918.31   36.60
   8  -8  -1  904.91   38.30
  -8  -8   1  914.31   52.89
  -8  -8   1  720.83   41.60
   8   8  -1  970.70   80.29
   8   8  -1  964.90   42.40
   7  -8  -1    3.50    2.90
  -7  -8   1    4.00    5.70
  -7  -8   1    2.20    2.70
   7  -8  -1    5.50    3.00
   7   8  -1    8.00    4.80
   7   8  -1    7.50    5.50
  -6  -8   1  404.46   22.80
   6  -8  -1  386.46   20.30
   6  -8  -1  427.16   21.90
   6  -8  -1  395.06   17.20
  -6  -8   1  418.36   31.70
   6   8  -1  328.57   27.80
   6   8  -1  371.56   22.70
   5  -8  -1   24.00    3.80
  -5  -8   1   24.40    6.30
   5  -8  -1   32.40    7.70
  -5  -8   1   12.80    5.70
   5  -8  -1   19.30    5.50
  -5  -8   1   25.90    6.80
   5   8  -1   20.20    8.60
   5   8  -1   32.50   12.00
   4  -8  -1   87.59   11.40
  -4  -8   1   87.49   10.90
   4  -8  -1  100.99   11.70
  -4  -8   1   99.99   11.90
  -4  -8   1   99.19   17.10
   4   8  -1   74.59   10.50
   4   8  -1   86.69   17.60
  -3  -8   1  391.26   26.10
  -3  -8   1  422.46   20.10
   3  -8  -1  387.96   18.50
  -3  -8   1  418.96   20.50
   3   8  -1  427.46   20.60
  -3   8   1  422.06   18.70
  -2  -8   1 2394.06   75.19
  -2  -8   1 2344.37   64.09
  -2  -8   1 2287.27   65.09
   2  -8  -1 2278.97   63.79
   2   8  -1 2314.17   64.79
  -1  -8   1   27.30    5.30
  -1  -8   1   33.10    8.40
   1  -8  -1   24.30    4.90
  -1  -8   1   26.70    4.80
   1  -8  -1   28.70    5.50
   1  -8  -1   30.30    4.10
  -1   8   1   25.40    5.10
   1   8  -1   25.20    5.20
   0  -8  -1 1315.77   41.50
   0  -8   1 1326.37   40.20
   0  -8  -1 1364.26   37.80
   0  -8  -1 1355.96   44.20
   0  -8   1 1351.56   37.90
   0  -8   1 1315.17   44.60
   0   8  -1 1359.66   40.00
   0   8   1 1317.87   41.10
   1  -8   1  141.79    9.30
  -1  -8  -1  151.78   13.10
   1  -8   1  129.49    9.80
   1  -8   1  151.58    7.70
  -1  -8  -1  153.88    9.70
  -1  -8  -1  133.79   10.40
   1   8   1  139.89   11.70
   1   8   1  168.38   11.30
  -1   8  -1  146.09    9.30
   2  -8   1   32.90    5.90
  -2  -8  -1   25.20    5.50
   2  -8   1   24.40    3.20
  -2  -8  -1   25.50    5.60
  -2  -8  -1   41.10   10.20
   2   8   1   23.30    7.10
  -2   8  -1   27.30    5.00
   2   8   1   30.70    6.60
   3  -8   1  231.78    8.30
  -3  -8  -1  224.78   14.10
   3  -8   1  226.88   12.50
  -3  -8  -1  233.18   19.30
   3   8   1  208.48   14.40
   3   8   1  244.98   21.80
  -3   8  -1  234.88   12.40
   4  -8   1 1682.53   42.10
  -4  -8  -1 1633.14   52.49
  -4  -8  -1 1642.94   63.89
  -4  -8  -1 1653.23   54.19
   4  -8   1 1706.33   48.90
   4  -8   1 1721.93   49.50
   4   8   1 1590.54   62.89
   4   8   1 1690.73   54.19
   5  -8   1    0.40    1.10
  -5  -8  -1   -0.60    1.30
   5  -8   1    1.80    1.60
   5  -8   1    0.00    1.00
  -5  -8  -1    1.10    2.80
   5   8   1    1.60    2.20
   5   8   1    2.30    2.70
  -6  -8  -1  714.63   32.10
  -6  -8  -1  716.13   42.10
   6  -8   1  711.53   31.00
   6  -8   1  698.93   26.40
   6  -8   1  770.72   29.80
   6   8   1  718.63   33.40
   6   8   1  642.84   40.40
   7  -8   1  210.18   17.40
  -7  -8  -1  233.58   30.20
   7  -8   1  224.18   14.90
  -7  -8  -1  205.88   16.70
   7  -8   1  216.68   14.90
   7   8   1  228.08   18.40
   7   8   1  243.38   31.00
  -8  -8  -1   17.00    5.90
   8  -8   1   11.00    4.90
   8  -8   1   17.30    6.20
  -8  -8  -1   22.90   10.90
   8   8   1    8.10    4.70
   9  -8   1  104.59   15.70
  -9  -8  -1   98.29   19.90
   9  -8   1   96.89   14.10
   9   8   1  103.99   16.40
 -10  -8  -1  441.66   37.70
  10  -8   1  375.46   24.50
  10  -8   1  343.07   25.40
  10   8   1  368.06   28.10
  11  -8   1   11.90    6.30
  11  -8   1   27.60    9.30
 -11  -8  -1    4.60    5.60
  11   8   1    8.20    5.40
  12  -8   1  112.69   20.80
  12   8   1  159.78   25.30
  13  -8   1   49.30   13.50
  13  -8   1   20.10   13.80
  13   8   1   62.19   15.70
  14  -8   1   19.00    7.80
  14   8   1   26.00   10.30
  14  -9  -1   32.20   10.90
  14   9  -1   38.80   12.50
 -13  -9   1   -0.60    3.10
  13  -9  -1    9.10    5.70
  13   9  -1   13.50    8.70
  12  -9  -1   92.29   17.50
  12   9  -1   67.09   15.10
  11  -9  -1   27.10    9.50
 -11  -9   1   53.79   19.50
  11  -9  -1   28.90    9.70
  11   9  -1   26.90    9.40
  10  -9  -1  462.55   28.10
  10  -9  -1  423.56   40.00
  10   9  -1  398.06   33.20
   9  -9  -1  162.48   14.60
  -9  -9   1  218.68   34.70
   9  -9  -1  196.78   17.20
   9   9  -1  210.98   24.80
   8  -9  -1  126.49   11.50
   8  -9  -1  124.59   15.60
   8   9  -1  135.49   17.90
   7  -9  -1   79.69    7.90
  -7  -9   1   59.09   16.10
  -7  -9   1  105.69   15.50
   7  -9  -1   78.19   12.40
   7   9  -1   53.39   10.80
  -6  -9   1  137.29   13.30
   6  -9  -1  164.78   18.80
   6  -9  -1  137.39    8.50
  -6  -9   1  200.08   29.50
   6  -9  -1  162.58   13.20
   6   9  -1  156.58   18.40
   5  -9  -1   26.50    6.30
  -5  -9   1   23.30   10.00
   5  -9  -1   25.90    6.70
   5   9  -1   24.70    8.90
   5   9  -1    7.70    4.00
   4  -9  -1 1684.33   51.89
  -4  -9   1 1726.93   53.79
  -4  -9   1 1513.25   52.89
  -4  -9   1 1676.33   66.09
   4   9  -1 1681.03   54.19
   4   9  -1 1532.45   62.39
  -4   9   1 1690.63   50.89
  -3  -9   1   26.20    6.00
   3  -9  -1   25.90    3.40
  -3  -9   1   19.40    5.90
   3  -9  -1   20.20    1.80
  -3  -9   1   23.70    8.40
   3  -9  -1   20.30    5.40
   3   9  -1   14.40    4.90
  -3   9   1   19.80    5.10
   2  -9  -1  231.68   14.00
  -2  -9   1  255.87   19.80
   2  -9  -1  246.88   11.90
   2  -9  -1  246.08    9.30
  -2  -9   1  220.08   13.40
  -2  -9   1  220.18   14.30
  -2   9   1  233.78   13.70
   2   9  -1  216.18   14.00
   1  -9  -1   49.50    7.80
  -1  -9   1   46.60   10.20
  -1  -9   1   34.20    5.80
  -1  -9   1   40.20    7.10
   1  -9  -1   39.30    6.90
   1  -9  -1   41.50    4.10
  -1   9   1   41.70    7.30
   1   9  -1   44.70    7.50
   0  -9  -1   71.69    6.10
   0  -9   1   84.79   12.30
   0  -9   1   65.19    8.60
   0  -9  -1   74.99   10.80
   0  -9   1   72.79    6.10
   0  -9  -1   74.39    9.30
   0   9   1   61.49    8.70
   0   9  -1   78.39    9.60
   1  -9   1    0.70    1.10
   1  -9   1    0.40    0.90
  -1  -9  -1    1.70    1.70
   1  -9   1    2.20    2.10
  -1  -9  -1    0.30    1.00
  -1  -9  -1    1.30    2.30
   1   9   1   -0.30    1.30
  -1   9  -1   -0.20    1.40
  -2  -9  -1 1336.87   42.80
  -2  -9  -1 1363.36   52.19
  -2  -9  -1 1280.37   48.10
   2  -9   1 1348.97   41.40
   2   9   1 1371.76   50.19
  -2   9  -1 1388.76   40.90
   2   9   1 1379.76   44.90
   3  -9   1   15.30    2.50
  -3  -9  -1   13.20    5.10
  -3  -9  -1   10.30    3.70
  -3  -9  -1    4.00    3.40
   3  -9   1   12.20    3.70
   3   9   1   12.70    5.80
   3   9   1    9.80    4.40
  -3   9  -1   13.30    4.20
   4  -9   1  355.86   17.50
  -4  -9  -1  398.46   24.50
   4  -9   1  398.06   18.70
  -4  -9  -1  372.56   27.20
  -4  -9  -1  354.96   20.00
   4  -9   1  362.16   12.20
   4   9   1  331.87   25.30
   4   9   1  377.96   21.40
   5  -9   1  339.57   17.50
  -5  -9  -1  313.47   26.50
   5  -9   1  320.47   17.40
   5  -9   1  349.87   13.40
   5   9   1  331.97   20.90
   5   9   1  290.57   25.60
   6  -9   1  289.77   17.20
  -6  -9  -1  319.37   27.90
   6  -9   1  307.87   17.30
  -6  -9  -1  299.87   20.10
   6  -9   1  296.47   14.60
   6   9   1  307.07   21.10
   7  -9   1   17.30    5.90
   7  -9   1    7.80    3.60
  -7  -9  -1    7.80    8.70
  -7  -9  -1    3.60    3.30
   7  -9   1   12.40    5.00
   7   9   1    6.60    4.30
   8  -9   1  813.32   35.50
  -8  -9  -1  966.40   62.49
   8  -9   1  842.32   34.70
   8   9   1  818.82   40.40
  -9  -9  -1   -1.90    2.70
   9  -9   1    2.80    3.00
   9  -9   1    6.80    4.50
   9   9   1    2.10    3.20
  10  -9   1  209.58   18.80
 -10  -9  -1  243.48   33.00
  10  -9   1  247.18   19.60
  10   9   1  198.08   23.80
  11  -9   1   15.10    6.80
 -11  -9  -1   20.10   10.60
  11  -9   1    5.30    5.90
  11   9   1   19.30    9.00
  12  -9   1   60.09   14.40
  12  -9   1   60.29   13.00
  12   9   1   98.39   19.40
 -13  -9  -1   -0.10    3.10
  13  -9   1   -0.50    2.30
  13  -9   1    2.00    4.40
  13   9   1    5.40    6.10
  13 -10  -1   13.80    6.80
 -13 -10   1    1.00    4.00
  13  10  -1    3.10    5.30
  12 -10  -1   86.89   16.80
  12  10  -1   97.19   19.90
 -11 -10   1  282.07   43.40
  11  10  -1  284.87   25.80
  10 -10  -1   22.10    7.70
 -10 -10   1   28.70   13.10
  10  10  -1   16.40    8.60
  -9 -10   1  136.19   19.60
  -9 -10   1  119.69   21.40
   9 -10  -1  211.78   23.90
   9  10  -1  180.28   21.90
  -8 -10   1  311.07   42.20
   8 -10  -1  270.57   19.70
  -8 -10   1  262.87   21.50
   8  10  -1  291.77   23.00
   7 -10  -1   41.60    9.30
  -7 -10   1   33.20    8.50
  -7 -10   1   45.20   13.60
   7  10  -1   35.90   10.00
  -6 -10   1  266.57   26.80
  -6 -10   1  242.48   18.50
   6 -10  -1  258.07   17.50
   6  10  -1  280.87   20.30
  -5 -10   1  637.94   39.90
  -5 -10   1  559.04   27.90
   5 -10  -1  540.95   25.50
   5 -10  -1  562.24   29.70
   5  10  -1  570.94   28.70
   4 -10  -1  110.69   13.30
  -4 -10   1  106.39   13.40
  -4 -10   1  119.39   20.80
   4  10  -1   94.39   13.50
  -4  10   1  101.89   12.20
   3 -10  -1  567.24   25.10
  -3 -10   1  590.14   25.90
   3 -10  -1  570.94   16.00
   3 -10  -1  590.54   18.50
  -3 -10   1  619.04   35.80
  -3 -10   1  533.15   26.00
   3  10  -1  557.94   26.20
  -3  10   1  559.84   24.30
   2 -10  -1  329.07   15.40
  -2 -10   1  246.38   37.20
   2 -10  -1  323.27   12.00
  -2 -10   1  320.47   18.30
  -2 -10   1  315.57   17.00
  -2  10   1  313.67   16.90
   2  10  -1  313.37   17.60
   1 -10  -1   29.70    4.70
  -1 -10   1   27.70    5.80
  -1 -10   1   24.00    5.80
   1 -10  -1   23.80    6.50
  -1  10   1   25.80    6.10
   1  10  -1   20.60    5.10
   0 -10  -1  491.65   30.80
   0 -10  -1  456.45   24.70
   0 -10  -1  471.05   19.00
   0 -10   1  470.25   21.40
   0 -10   1  406.26   34.00
   0 -10   1  490.65   19.10
   0  10   1  459.65   21.70
   0  10  -1  489.95   21.20
   1 -10   1  957.90   33.70
  -1 -10  -1  929.81   35.90
   1 -10   1 1081.99   41.50
   1 -10   1 1004.30   29.70
  -1 -10  -1 1000.10   33.40
   1  10   1  936.31   35.40
  -1  10  -1  949.90   33.00
   2 -10   1   40.20    7.20
  -2 -10  -1   54.29    9.80
  -2 -10  -1   39.00   12.00
   2 -10   1   47.30    4.20
  -2 -10  -1   49.80    8.00
  -2  10  -1   56.29    7.90
   2  10   1   41.80   10.30
   2  10   1   55.29   10.00
   3 -10   1  368.36   12.50
  -3 -10  -1  348.57   23.20
  -3 -10  -1  387.36   20.20
  -3 -10  -1  383.76   26.90
   3 -10   1  365.06   18.10
   3  10   1  382.66   21.20
  -3  10  -1  374.96   17.70
   4 -10   1  743.73   28.90
  -4 -10  -1  733.93   31.50
   4 -10   1  731.83   28.20
  -4 -10  -1  707.73   40.30
   4 -10   1  720.23   20.60
   4  10   1  745.03   32.90
   5 -10   1   13.50    4.60
  -5 -10  -1   12.10    7.50
   5 -10   1   10.40    2.50
  -5 -10  -1    8.60    4.30
   5 -10   1   16.40    5.30
   5  10   1   10.20    5.10
   6 -10   1  322.27   14.40
   6 -10   1  335.97   18.70
   6 -10   1  318.67   21.30
  -6 -10  -1  348.27   22.20
  -6 -10  -1  352.26   30.20
   6  10   1  322.37   22.20
  -7 -10  -1  490.45   37.30
  -7 -10  -1  409.76   26.00
   7 -10   1  420.96   23.10
   7  10   1  504.25   29.20
  -8 -10  -1   11.10    6.60
  -8 -10  -1    7.00    6.60
   8 -10   1    4.90    3.90
   8 -10   1    6.40    3.70
   8  10   1   17.90    6.90
   9 -10   1  352.36   22.90
  -9 -10  -1  325.97   33.10
   9 -10   1  365.96   22.20
   9  10   1  410.76   28.90
  10 -10   1  291.57   21.70
  10 -10   1  293.97   21.50
 -10 -10  -1  249.08   34.50
  10  10   1  362.56   28.00
  11 -10   1   10.40    6.00
 -11 -10  -1    7.80    8.60
  11 -10   1    6.60    4.40
  11  10   1   13.80    7.90
  12 -10   1   80.39   15.70
  12 -10   1   75.79   14.40
  12  10   1  118.19   21.00
  13 -10   1  208.58   27.20
  13 -10   1  216.98   26.00
  13 -11  -1  147.29   23.10
  13  11  -1  244.98   34.50
  12 -11  -1   13.10    7.00
 -12 -11   1   11.30    8.30
  12  11  -1   -1.50    3.00
 -11 -11   1   76.99   20.70
  11 -11  -1   86.79   16.40
  11  11  -1   83.69   17.90
 -10 -11   1   11.10    7.50
  10 -11  -1   19.60    7.20
  10  11  -1   38.80   11.30
   9 -11  -1  367.26   24.80
  -9 -11   1  384.66   27.90
  -9 -11   1  382.66   37.30
   9  11  -1  462.85   53.09
   8 -11  -1   18.00    6.40
  -8 -11   1   16.90   11.20
  -8 -11   1   13.80    5.80
   8  11  -1   11.80    5.60
  -7 -11   1  707.43   47.10
  -7 -11   1  636.24   33.40
   7 -11  -1  600.84   30.30
   7  11  -1  617.64   34.00
  -6 -11   1  110.89   22.50
  -6 -11   1   93.79   13.80
   6 -11  -1   79.39   12.70
   6  11  -1   94.19   15.90
  -5 -11   1  502.65   26.70
   5 -11  -1  488.15   25.00
  -5 -11   1  478.95   35.70
   5  11  -1  491.55   27.20
  -4 -11   1   65.79   10.80
   4 -11  -1   86.99   12.30
  -4 -11   1   64.29   14.00
   4  11  -1   63.19   11.00
  -4  11   1   98.59   14.60
   3 -11  -1  379.16   12.40
   3 -11  -1  404.46   15.20
  -3 -11   1  394.16   21.00
  -3 -11   1  389.96   28.40
   3 -11  -1  353.36   19.90
   3  11  -1  345.47   20.50
  -3  11   1  394.06   20.20
  -2 -11   1   80.69   11.80
   2 -11  -1   61.39    5.00
   2 -11  -1   75.99    9.70
  -2 -11   1   74.09   10.00
  -2 -11   1   59.89   12.80
   2 -11  -1   62.49   10.00
   2  11  -1   64.99   10.10
  -2  11   1   60.09    9.30
  -1 -11   1  788.42   37.30
   1 -11  -1  778.82   31.10
  -1 -11   1  725.33   30.90
   1 -11  -1  742.53   24.90
  -1 -11   1  715.43   30.10
   1 -11  -1  764.22   31.00
   1  11  -1  756.12   30.10
  -1  11   1  761.62   30.10
   0 -11  -1   17.40    4.40
   0 -11   1    8.10    4.80
   0 -11  -1   18.70    6.00
   0 -11   1   21.00    4.80
   0 -11  -1   11.90    5.30
   0  11  -1   12.80    4.10
   0  11   1   21.00    5.80
   1 -11   1  488.55   23.20
  -1 -11  -1  536.95   25.90
  -1 -11  -1  547.05   23.20
  -1 -11  -1  565.04   30.20
   1 -11   1  610.64   27.40
   1 -11   1  528.35   19.90
  -1  11  -1  576.64   23.70
  -2 -11  -1   61.99   12.70
   2 -11   1   71.69    5.60
   2 -11   1   82.49    8.30
  -2 -11  -1   77.09   10.70
   2 -11   1   66.49    9.50
  -2  11  -1   78.29   10.10
   2  11   1   73.49   10.70
   3 -11   1  172.88    8.10
  -3 -11  -1  203.38   14.60
  -3 -11  -1  182.78   24.00
   3 -11   1  178.28   10.80
  -3  11  -1  180.28   12.30
   3  11   1  198.88   15.30
   4 -11   1    4.60    1.70
   4 -11   1    6.20    3.30
  -4 -11  -1   10.20    4.90
   4 -11   1    7.70    3.40
  -4 -11  -1    1.20    3.10
   4  11   1    5.80    4.20
   5 -11   1 1580.14   50.49
  -5 -11  -1 1527.65   68.09
   5 -11   1 1451.75   49.00
  -5 -11  -1 1538.05   54.39
   5  11   1 1561.74   56.09
   6 -11   1    0.30    2.00
   6 -11   1    3.60    1.80
  -6 -11  -1    4.00    5.10
  -6 -11  -1   -1.00    2.00
   6  11   1    3.20    3.10
   7 -11   1  214.18   11.90
  -7 -11  -1  228.58   19.20
  -7 -11  -1  197.78   28.90
   7 -11   1  211.58   16.10
   7  11   1  249.28   20.60
   8 -11   1  162.28   19.20
  -8 -11  -1  133.79   18.80
  -8 -11  -1  142.89   26.20
   8 -11   1  132.39   10.70
   8  11   1  107.99   17.50
   9 -11   1  117.19   11.40
  -9 -11  -1   95.59   18.70
  -9 -11  -1   89.29   19.90
   9 -11   1  121.09   16.30
   9  11   1  113.69   19.30
  10 -11   1    5.40    3.80
 -10 -11  -1   15.30    8.60
  10 -11   1    9.30    5.10
  10  11   1    4.40    5.30
  11 -11   1  485.35   28.90
 -11 -11  -1  462.45   43.30
  11 -11   1  478.05   29.80
  11  11   1  456.35   33.70
  12 -11   1   -0.60    2.00
  12 -11   1    4.90    4.60
 -12 -11  -1    7.00    8.40
  12  11   1    1.80    3.90
  13 -11   1   28.70    9.70
  13  11   1   36.90   11.50
  12 -12  -1    7.30    4.70
 -12 -12   1   15.80    9.80
  12  12  -1   18.70    9.60
  11 -12  -1  105.59   17.40
 -11 -12   1  151.78   30.00
  11  12  -1  127.19   20.30
  10 -12  -1    4.30    4.00
 -10 -12   1    6.20    5.80
  10  12  -1   -2.30    2.70
  -9 -12   1  334.67   26.70
   9 -12  -1  395.36   26.00
  -9 -12   1  458.05   41.40
   9  12  -1  406.36   29.60
  -8 -12   1    6.40    5.60
  -8 -12   1    2.10    2.80
   8 -12  -1    5.30    3.70
   8  12  -1    4.90    4.30
  -7 -12   1   25.00   11.20
  -7 -12   1   15.90    6.70
   7 -12  -1   13.60    6.00
   7  12  -1   34.40   10.10
   6 -12  -1   62.89   11.10
  -6 -12   1   69.69   18.70
  -6 -12   1   64.29   12.20
   6  12  -1   58.99   12.30
  -5 -12   1  932.91   52.39
  -5 -12   1  853.31   38.20
   5 -12  -1  912.21   37.30
   5  12  -1  906.41   39.90
  -4 -12   1    3.70    5.70
  -4 -12   1   12.80    5.20
  -4  12   1   11.00    4.60
   4  12  -1    7.90    4.60
   3 -12  -1  523.95   19.80
   3 -12  -1  523.75   16.80
  -3 -12   1  579.74   26.80
  -3 -12   1  559.74   35.80
   3  12  -1  547.55   27.00
  -3  12   1  537.65   25.30
   2 -12  -1   32.40    4.90
  -2 -12   1   17.30    5.10
   2 -12  -1   27.40    6.30
  -2 -12   1   23.00    7.90
  -2  12   1   26.60    6.80
   2  12  -1   28.80    7.10
  -1 -12   1   22.20    7.90
   1 -12  -1   24.70    6.70
  -1 -12   1   11.40    4.70
  -1 -12   1   11.10    4.10
   1 -12  -1   18.70    4.40
  -1  12   1   19.00    5.50
   0 -12   1   59.19    9.80
   0 -12   1   55.09   12.00
   0 -12  -1   60.99    8.40
   0 -12  -1   53.19   11.20
   0 -12   1   45.60    7.10
   0  12   1   49.60    9.20
   0  12  -1   60.39    9.60
   1 -12   1  831.52   35.80
  -1 -12  -1  890.41   41.00
  -1 -12  -1  902.51   32.50
   1 -12   1  909.21   29.30
   1 -12   1  822.12   33.20
  -1  12  -1  917.51   33.30
   1  12   1  886.61   35.50
  -2 -12  -1   45.90   12.80
  -2 -12  -1   34.30    7.30
   2 -12   1   52.99    6.50
   2 -12   1   41.40    7.90
   2 -12   1   48.40    8.80
  -2  12  -1   51.89    8.70
   2  12   1   33.90    7.70
  -3 -12  -1  875.51   35.90
   3 -12   1  915.41   31.40
   3 -12   1  841.22   33.50
  -3 -12  -1  912.91   46.60
   3 -12   1  934.71   26.50
  -3  12  -1  929.61   33.70
   3  12   1  935.51   38.70
  -4 -12  -1   98.09   17.50
   4 -12   1  104.59    7.20
   4 -12   1  107.59   13.30
  -4 -12  -1  103.59   13.40
   4 -12   1  111.79    7.40
   4 -12   1  110.09   14.70
   4  12   1  115.89   16.10
  -5 -12  -1   10.90    7.10
  -5 -12  -1    9.80    4.90
   5 -12   1   11.90    4.70
   5  12   1   13.00    5.50
   6 -12   1   34.00    7.90
  -6 -12  -1   35.30   13.30
  -6 -12  -1   33.30    8.80
   6  12   1   49.90   11.50
  -7 -12  -1  440.36   28.20
  -7 -12  -1  408.36   36.20
   7 -12   1  446.46   24.40
   7  12   1  412.76   27.90
   8 -12   1    8.80    4.60
  -8 -12  -1   11.60    8.90
   8 -12   1    9.50    3.10
  -8 -12  -1    6.10    4.80
   9 -12   1  424.46   25.90
  -9 -12  -1  420.76   39.30
   9 -12   1  420.66   20.50
  -9 -12  -1  384.86   30.30
   9  12   1  426.66   30.40
  10 -12   1   -1.10    1.80
  10 -12   1    4.50    3.20
 -10 -12  -1   15.40   10.40
  10  12   1    9.70    7.20
 -11 -12  -1    3.20    5.00
  11 -12   1   -0.60    1.90
  11  12   1    1.80    4.50
 -12 -12  -1    2.40    4.90
  12 -12   1    2.10    3.10
  12  12   1   -3.10    3.80
  12 -13  -1   25.00    9.40
  12  13  -1   19.10    9.60
  11 -13  -1   27.20    9.40
  11  13  -1   20.90    9.10
  10 -13  -1  197.28   23.10
 -10 -13   1   98.99   21.80
  10  13  -1  119.49   20.00
   9 -13  -1   67.39   13.60
  -9 -13   1   75.89   21.90
   9  13  -1   50.19   12.40
  -8 -13   1   92.99   16.90
   8 -13  -1  108.29   16.00
  -8 -13   1  151.08   30.50
   8  13  -1  110.99   17.40
  -7 -13   1  141.09   24.20
   7 -13  -1  174.18   16.00
  -7 -13   1  199.58   18.60
   7  13  -1  184.98   22.00
  -6 -13   1   72.39   19.70
  -6 -13   1  101.79   16.70
   6 -13  -1  104.99   15.50
   6  13  -1   94.79   15.50
   5 -13  -1    1.60    3.40
  -5 -13   1    2.00    2.30
  -5 -13   1    0.30    4.70
   5  13  -1    6.60    5.30
  -4 -13   1  291.17   19.80
  -4 -13   1  255.37   26.10
  -4  13   1  303.47   18.80
   4  13  -1  273.37   19.90
  -3 -13   1   96.29   19.40
   3 -13  -1   84.09    7.40
  -3 -13   1   97.69   12.90
   3 -13  -1   85.49    5.80
  -3  13   1   82.59   11.30
   3  13  -1   85.09   13.30
   2 -13  -1   94.29    7.10
   2 -13  -1  111.49   10.20
  -2 -13   1  131.49   21.40
  -2 -13   1  103.19   13.10
   2  13  -1   94.69   12.90
  -2  13   1  123.59   15.20
  -1 -13   1  380.56   26.60
  -1 -13   1  372.96   19.50
   1 -13  -1  354.86   16.50
   1 -13  -1  336.17   21.00
  -1  13   1  355.26   20.50
   1  13  -1  369.36   20.70
   0 -13  -1   97.79   15.20
   0 -13   1   87.39   14.90
   0 -13  -1   78.79    8.00
   0 -13   1   82.99    8.10
   0  13   1   76.79   11.90
   0  13  -1   77.49   11.50
  -1 -13  -1  171.48   17.40
  -1 -13  -1  169.48   12.60
   1 -13   1  166.38   15.00
   1 -13   1  164.18   18.90
   1 -13   1  158.88   10.70
   1  13   1  164.08   14.20
  -1  13  -1  193.98   14.00
  -2 -13  -1  530.15   25.60
  -2 -13  -1  557.54   34.30
   2 -13   1  550.94   26.10
   2 -13   1  572.44   20.60
   2 -13   1  534.85   26.00
  -2  13  -1  561.04   28.50
   2  13   1  582.44   28.90
  -3 -13  -1   39.50    8.40
   3 -13   1   36.40    4.90
   3 -13   1   46.50   14.00
   3 -13   1   44.90    7.70
  -3 -13  -1   25.40    9.40
  -3  13  -1   41.70    8.20
   3  13   1   43.90   10.30
   4 -13   1  134.29    6.90
   4 -13   1  130.19    8.40
  -4 -13  -1  154.28   14.20
  -4 -13  -1  161.38   24.90
  -4  13  -1  142.49   15.50
   4  13   1  139.89   17.90
  -5 -13  -1  146.49   14.70
  -5 -13  -1  137.39   22.50
   5 -13   1  134.19   12.30
   5  13   1  138.29   19.30
   6 -13   1   41.00    8.60
  -6 -13  -1   29.50   10.70
  -6 -13  -1   52.49   11.20
   6  13   1   46.50   10.90
   7 -13   1   69.49   11.30
  -7 -13  -1   61.69   12.10
  -7 -13  -1   58.39   17.80
   7  13   1  103.89   17.70
  -8 -13  -1  286.57   23.80
   8 -13   1  296.67   20.80
  -8 -13  -1  224.88   32.50
   8  13   1  289.97   24.60
  -9 -13  -1   70.39   20.80
   9 -13   1   81.79   14.40
   9  13   1   77.89   16.60
  10 -13   1   63.49   13.40
 -10 -13  -1   70.79   21.60
  10  13   1   68.39   15.90
  11 -13   1  102.29   17.40
 -11 -13  -1   61.19   18.70
  11  13   1   76.59   17.00
  12 -13   1   93.49   16.70
 -12 -13  -1  105.29   26.70
  12  13   1   93.69   19.10
  11 -14  -1    4.80    4.10
 -11 -14   1   -0.70    4.50
  11  14  -1    8.30    6.40
  10 -14  -1   16.70    7.30
 -10 -14   1   23.60   15.60
  10  14  -1   11.50    7.20
   9 -14  -1   14.80    7.80
  -9 -14   1    9.70    7.30
   9  14  -1   22.20    9.40
  -8 -14   1  144.19   21.10
  -8 -14   1  184.18   33.50
   8 -14  -1  151.08   19.20
   8  14  -1  155.78   22.70
  -7 -14   1    6.50    7.40
   7 -14  -1    7.40    5.20
  -7 -14   1    5.80    4.70
   6 -14  -1  387.16   24.10
  -6 -14   1  371.56   35.10
  -6 -14   1  372.46   26.20
   6  14  -1  338.57   25.00
   5 -14  -1   31.50    8.30
  -5 -14   1   11.10    4.90
  -5 -14   1   17.40    7.60
   5  14  -1   23.30    8.20
  -4 -14   1    0.70    3.10
  -4 -14   1   -0.30    2.20
  -4  14   1    4.00    3.40
   4  14  -1   -1.50    2.40
   3 -14  -1    2.60    2.50
  -3 -14   1    0.50    2.60
  -3 -14   1   -0.40    3.50
   3 -14  -1    4.30    1.90
   3  14  -1    4.20    3.80
  -3  14   1    6.90    4.30
  -2 -14   1  480.25   28.10
  -2 -14   1  434.46   32.00
   2 -14  -1  484.15   23.80
   2 -14  -1  493.05   19.00
  -2  14   1  518.35   25.90
   2  14  -1  482.05   26.00
   1 -14  -1   24.40    5.40
   1 -14  -1   24.50    7.20
  -1 -14   1   18.70    5.70
  -1 -14   1   11.70    6.30
   1  14  -1   23.10    6.90
  -1  14   1   26.70    7.90
   0 -14   1  856.81   40.60
   0 -14  -1  795.02   30.80
   0 -14   1  822.22   31.10
   0 -14  -1  792.42   38.50
   0  14   1  846.12   35.70
   0  14  -1  844.22   34.30
   1 -14   1   54.29    8.10
  -1 -14  -1   41.30   11.00
  -1 -14  -1   45.40    8.40
   1 -14   1   59.49   11.70
   1  14   1   43.20    9.90
  -1  14  -1   42.60    8.90
  -2 -14  -1   40.50   11.60
  -2 -14  -1   36.40    9.20
   2 -14   1   53.19   10.30
   2 -14   1   42.70    6.50
   2  14   1   28.10    7.90
  -2  14  -1   52.19    9.70
   3 -14   1   36.30    5.30
   3 -14   1   34.60    7.20
  -3 -14  -1   19.60    8.70
  -3 -14  -1   28.00    7.60
  -3  14  -1   33.90    7.30
   3  14   1   36.10    9.20
  -4 -14  -1  372.66   31.60
   4 -14   1  392.46   16.00
   4 -14   1  352.16   13.20
  -4 -14  -1  407.76   24.60
  -4  14  -1  361.06   20.60
   4  14   1  350.06   24.10
  -5 -14  -1   -2.50    1.90
   5 -14   1   -0.50    2.00
  -5 -14  -1    1.90    2.60
   5  14   1    3.10    3.60
  -6 -14  -1  329.67   24.40
   6 -14   1  330.57   21.10
  -6 -14  -1  326.67   32.50
   6  14   1  326.77   24.60
  -7 -14  -1    6.30    5.30
   7 -14   1    3.60    3.40
  -7 -14  -1    4.10    5.50
   7  14   1   10.00    6.50
   8 -14   1    1.80    3.10
  -8 -14  -1   -3.40    2.50
   8  14   1   -2.20    2.70
   9 -14   1   16.70    6.80
  -9 -14  -1    8.60    7.90
   9  14   1    9.00    6.60
 -10 -14  -1  182.68   33.80
  10  14   1  190.48   27.40
  11 -14   1   -1.00    2.30
 -11 -14  -1    2.90    4.80
 -11 -15   1    6.00    7.70
  11 -15  -1    2.70    3.40
  11  15  -1    0.40    3.00
  10 -15  -1  284.97   23.40
 -10 -15   1  222.38   37.20
  10  15  -1  271.97   32.00
  -9 -15   1   75.39   20.90
   9 -15  -1   57.19   13.60
   9  15  -1   71.19   15.80
   8 -15  -1   68.49   12.60
  -8 -15   1   55.99   20.40
   8  15  -1   51.19   13.40
   7 -15  -1   34.80    9.10
  -7 -15   1   35.70   10.90
   7  15  -1   37.60   10.50
  -6 -15   1  123.49   21.20
   6 -15  -1  143.89   19.20
  -6 -15   1  123.69   25.10
   6  15  -1  114.99   20.00
   5 -15  -1   45.30   10.60
  -5 -15   1   46.70   14.20
  -5 -15   1   35.20    9.80
   5  15  -1   52.29   12.10
  -4 -15   1  723.03   35.50
  -4 -15   1  748.13   47.80
   4  15  -1  736.03   36.50
  -4  15   1  771.12   34.40
  -3 -15   1   14.90    8.30
  -3 -15   1   14.60    6.20
   3 -15  -1   16.60    3.70
   3 -15  -1   13.70    4.30
  -3  15   1   15.70    6.50
   3  15  -1   17.10    6.60
  -2 -15   1   60.69   10.50
  -2 -15   1   31.50   11.40
   2 -15  -1   53.79    7.20
   2 -15  -1   60.99   10.40
  -2  15   1   40.40    9.20
   2  15  -1   49.90   10.30
   1 -15  -1   17.10    4.80
  -1 -15   1   43.60   13.10
   1 -15  -1   36.40    9.40
  -1 -15   1   15.70    5.30
   1  15  -1   29.10    7.50
  -1  15   1   23.30    6.60
   0 -15   1  214.28   14.40
   0 -15  -1  205.28   14.00
   0 -15  -1  219.28   19.40
   0 -15   1  225.08   20.30
   0  15   1  210.78   16.90
   0  15  -1  187.08   15.30
   1 -15   1   30.10    8.70
   1 -15   1   37.30    6.90
  -1 -15  -1   42.70    8.40
  -1 -15  -1   36.20   10.40
  -1  15  -1   43.70    9.10
   1  15   1   41.10   10.30
   2 -15   1  513.85   21.10
  -2 -15  -1  561.54   36.40
   2 -15   1  566.54   28.20
  -2 -15  -1  528.25   27.00
   2  15   1  562.34   29.80
  -2  15  -1  556.54   26.80
  -3 -15  -1   36.70    8.80
  -3 -15  -1   43.00   13.30
   3 -15   1   52.99    9.00
   3 -15   1   34.00    5.30
   3  15   1   31.20    8.10
  -3  15  -1   49.60    9.50
  -4 -15  -1  123.09   16.10
   4 -15   1  123.39    7.10
  -4 -15  -1  131.99   24.50
   4 -15   1  127.99    8.60
   4  15   1  112.89   17.00
  -4  15  -1  134.69   15.40
   5 -15   1  185.88   15.70
  -5 -15  -1  176.98   29.40
  -5 -15  -1  167.98   16.80
   5  15   1  193.28   22.50
   6 -15   1  144.69   17.70
  -6 -15  -1  127.49   23.90
   6  15   1  152.38   20.80
  -7 -15  -1   22.40    8.80
  -7 -15  -1   45.40   24.70
   7 -15   1   25.30    7.70
   7  15   1   31.20   10.00
   8 -15   1  241.18   19.40
  -8 -15  -1  198.38   32.10
   8  15   1  307.97   25.80
  -9 -15  -1   -0.10    3.20
   9 -15   1    3.20    3.40
   9  15   1   -0.90    3.30
  10 -15   1  136.99   19.70
 -10 -15  -1  132.29   28.80
  10  15   1  168.78   25.40
 -10 -16   1    2.90    6.00
  10 -16  -1    4.70    4.50
  10  16  -1   -3.90    4.50
  -9 -16   1  113.49   24.20
   9 -16  -1  128.89   18.90
   9  16  -1  152.88   23.30
   8 -16  -1  101.39   16.40
  -8 -16   1   75.59   19.80
   8  16  -1   96.69   18.60
   7 -16  -1    4.00    3.70
  -7 -16   1   -1.40    4.50
   7  16  -1    0.30    2.80
  -6 -16   1   91.39   16.30
   6 -16  -1   75.29   13.40
  -6 -16   1  101.39   23.70
   6  16  -1   81.39   15.20
  -5 -16   1  226.48   35.10
  -5 -16   1  223.28   19.60
   5 -16  -1  219.48   18.70
   5  16  -1  203.68   28.20
  -4 -16   1    1.30    2.90
  -4 -16   1    1.80    3.70
   4  16  -1    2.90    3.00
  -4  16   1    1.00    3.10
   3 -16  -1  144.19   11.10
  -3 -16   1  137.49   17.80
   3 -16  -1  144.99    8.80
   3  16  -1  139.89   18.10
  -3  16   1  169.28   15.10
   2 -16  -1  264.67   17.90
  -2 -16   1  255.87   18.40
  -2 -16   1  265.57   36.90
   2 -16  -1  275.67   14.40
  -2  16   1  278.47   19.80
   2  16  -1  258.07   19.60
  -1 -16   1    3.90    3.40
   1 -16  -1    5.00    4.10
  -1 -16   1    7.10    6.20
   1 -16  -1    1.50    2.30
  -1  16   1    2.10    3.50
   1  16  -1    9.00    4.90
   0 -16   1  330.87   25.90
   0 -16   1  330.27   19.20
   0 -16  -1  413.26   27.50
   0 -16  -1  391.06   20.30
   0  16   1  390.96   24.00
   0  16  -1  353.96   22.10
   1 -16   1  164.68   12.00
   1 -16   1  166.78   16.60
  -1 -16  -1  161.28   13.60
  -1 -16  -1  194.38   25.00
   1  16   1  153.08   19.00
  -1  16  -1  170.48   14.70
  -2 -16  -1   93.09   13.90
   2 -16   1   90.59    8.10
   2 -16   1   73.69   12.40
  -2 -16  -1  109.89   24.90
   2  16   1   77.89   13.30
  -2  16  -1   93.89   13.80
  -3 -16  -1  199.88   17.00
   3 -16   1  196.68   11.00
   3 -16   1  185.88   13.90
   3  16   1  209.28   18.60
  -3  16  -1  179.08   14.90
   4 -16   1   64.69    7.70
   4 -16   1   63.19    5.10
  -4 -16  -1   58.19   16.80
  -4 -16  -1   60.99   11.90
   4  16   1   71.29   14.90
  -4  16  -1   73.49   12.40
  -5 -16  -1    1.00    2.70
   5 -16   1    4.70    3.40
  -5 -16  -1   -2.10    2.50
   5  16   1    4.80    5.30
  -6 -16  -1  194.88   33.50
   6 -16   1  177.08   16.00
  -6 -16  -1  143.89   20.00
   6  16   1  158.58   23.30
  -7 -16  -1  202.98   33.60
   7 -16   1  193.68   17.20
   7  16   1  207.68   26.30
  -8 -16  -1   -0.90    4.10
   8 -16   1    1.40    3.40
   8  16   1   -0.10    3.30
  -9 -16  -1  204.38   36.40
   9 -16   1  154.38   19.60
   9  16   1  155.18   23.10
  10 -16   1   38.00   10.00
 -10 -16  -1   34.30   15.30
  10  16   1   39.20   12.30
  -9 -17   1  106.99   27.20
   9 -17  -1   82.89   15.20
   9  17  -1   74.39   16.10
   8 -17  -1    0.70    3.00
  -8 -17   1   -2.30    2.70
   8  17  -1   13.90    8.00
  -7 -17   1  281.97   39.90
   7 -17  -1  337.37   24.60
   7  17  -1  328.97   27.00
   6 -17  -1    4.10    3.70
  -6 -17   1    1.30    4.50
   6  17  -1    6.80    5.50
   5 -17  -1   43.50   10.40
  -5 -17   1   47.00   11.70
  -5 -17   1   60.19   18.10
   5  17  -1   55.19   13.30
  -4 -17   1    7.10    6.60
  -4 -17   1   16.70    6.70
  -4  17   1    9.20    5.30
  -3 -17   1   30.60    8.90
   3 -17  -1   54.29    6.80
   3 -17  -1   57.29    8.70
  -3 -17   1   19.30    9.60
  -3  17   1   37.60    9.50
   3  17  -1   48.00   11.30
   2 -17  -1    3.60    3.20
   2 -17  -1    2.60    2.50
  -2 -17   1    1.30    2.50
  -2 -17   1   12.30    7.50
   2  17  -1    7.30    4.90
  -2  17   1   -1.30    2.00
   1 -17  -1  396.86   25.60
  -1 -17   1  350.66   29.20
  -1 -17   1  431.26   23.60
  -1  17   1  408.36   24.90
   1  17  -1  392.86   24.60
   0 -17  -1   -2.80    2.10
   0 -17   1   -2.00    3.10
   0 -17  -1    3.30    3.00
   0 -17   1   -0.10    2.30
   0  17   1    1.70    3.70
   0  17  -1    3.70    3.80
  -1 -17  -1  112.59   14.50
   1 -17   1   90.49   15.50
   1 -17   1  128.49   12.20
  -1 -17  -1  105.09   19.40
  -1  17  -1  109.29   15.30
   1  17   1  127.79   18.20
  -2 -17  -1   62.79   11.30
   2 -17   1   49.30   10.60
  -2 -17  -1   56.29   15.30
   2 -17   1   56.39    8.10
  -2  17  -1   77.19   12.00
   2  17   1   49.30   11.00
  -3 -17  -1  133.69   17.20
   3 -17   1  119.59    8.70
   3 -17   1  126.49   11.50
  -3 -17  -1  143.99   25.30
  -3  17  -1  130.69   16.00
   4 -17   1    6.80    5.20
  -4 -17  -1    0.60    3.40
  -4 -17  -1    3.00    3.30
   4 -17   1    5.70    2.40
   4 -17   1    4.00    2.50
   4  17   1   10.40    5.80
   5 -17   1  425.56   25.90
  -5 -17  -1  416.46   37.60
  -5 -17  -1  412.86   29.70
   5  17   1  469.35   30.80
   6 -17   1    7.50    4.50
  -6 -17  -1    0.60    4.10
   6  17   1    7.10    5.30
   7 -17   1  132.19   18.10
  -7 -17  -1  134.49   29.20
   7  17   1  136.09   21.60
  -8 -17  -1   -2.40    2.80
   8 -17   1    5.00    4.70
   8  17   1   -3.00    3.30
   9 -17   1   74.09   14.20
  -9 -17  -1   44.90   17.30
   9  17   1   65.79   18.20
   8 -18  -1   54.79   12.10
  -8 -18   1   70.29   22.80
   8  18  -1   64.09   15.30
   7 -18  -1    1.40    3.00
  -7 -18   1    0.20    5.10
   7  18  -1    2.00    3.60
   6 -18  -1   22.00    7.60
  -6 -18   1   31.60   14.20
   6  18  -1   25.40    8.90
   5 -18  -1  255.37   21.60
  -5 -18   1  320.37   42.80
   5  18  -1  260.77   23.00
  -4 -18   1   -0.70    2.00
  -4 -18   1   -0.90    2.70
  -4  18   1    2.00    3.80
   4  18  -1    2.50    3.10
  -3 -18   1  146.59   26.10
   3 -18  -1  198.88   13.40
  -3 -18   1  176.28   16.90
   3 -18  -1  179.38   10.50
   3  18  -1  216.78   25.20
  -3  18   1  186.08   21.70
   2 -18  -1   42.90    9.40
  -2 -18   1   46.70   14.20
   2 -18  -1   41.00    7.10
  -2 -18   1   29.30    7.80
  -2  18   1   44.80   10.30
   2  18  -1   48.60   10.90
  -1 -18   1    9.40    5.30
   1 -18  -1    5.60    4.90
  -1 -18   1    7.60    6.30
   1 -18  -1   11.80    4.40
   1  18  -1    4.20    3.90
  -1  18   1   12.60    5.80
   0 -18   1  177.78   24.90
   0 -18  -1  200.28   15.20
   0 -18  -1  204.48   25.40
   0 -18   1  207.38   15.60
   0  18   1  167.18   19.40
   0  18  -1  205.28   17.40
  -1 -18  -1  212.78   27.20
   1 -18   1  186.48   18.60
   1 -18   1  182.98   13.50
  -1 -18  -1  193.78   15.80
  -1  18  -1  198.78   16.90
   1  18   1  182.48   30.90
  -2 -18  -1    0.10    2.60
   2 -18   1    3.00    3.60
  -2 -18  -1   -0.80    3.20
   2 -18   1    0.10    1.70
   2  18   1   -1.10    1.90
  -2  18  -1   -0.50    1.90
  -3 -18  -1  220.68   30.80
   3 -18   1  279.07   17.60
  -3 -18  -1  267.17   20.90
   3 -18   1  281.07   14.30
   3  18   1  279.07   23.00
  -3  18  -1  313.97   20.90
   4 -18   1   96.29   15.10
  -4 -18  -1  117.19   24.10
  -4 -18  -1   81.19   18.30
   4  18   1   82.19   14.80
   5 -18   1    3.60    3.40
  -5 -18  -1   -1.80    2.40
   5  18   1   -2.80    2.10
   6 -18   1   56.39   11.60
  -6 -18  -1   51.29   17.10
   6  18   1   22.40    9.00
   7 -18   1  199.48   18.30
  -7 -18  -1  164.58   32.70
   7  18   1  178.78   26.50
  -8 -18  -1    3.80    6.70
   8 -18   1    5.70    4.60
   7 -19  -1   27.60   10.00
  -7 -19   1   43.50   18.30
   7  19  -1   36.40   11.00
  -6 -19   1   17.00   10.20
   6 -19  -1   17.60    7.40
   6  19  -1   33.80   11.10
   5 -19  -1   13.10    7.10
  -5 -19   1    7.40    7.00
   5  19  -1    9.30    6.00
  -4 -19   1  346.17   34.50
   4  19  -1  317.17   24.70
  -4  19   1  250.87   21.00
   3 -19  -1   77.19   10.40
  -3 -19   1   73.79   19.40
   3 -19  -1   63.69    6.40
  -3  19   1   79.39   14.50
   3  19  -1   86.79   15.50
  -2 -19   1   11.80    6.00
   2 -19  -1   17.00    4.80
   2 -19  -1    5.10    3.80
  -2 -19   1   13.10    8.30
   2  19  -1    6.80    4.50
  -2  19   1   20.20    8.00
  -1 -19   1   65.29   11.70
  -1 -19   1   55.99   14.90
   1 -19  -1   67.79   14.00
   1 -19  -1   62.69   10.10
   1  19  -1   67.99   12.90
  -1  19   1   38.70    9.60
   0 -19   1   66.29   11.40
   0 -19   1   69.89   15.00
   0 -19  -1   88.19   12.80
   0 -19  -1   80.69   16.40
   0  19   1   90.49   15.70
   0  19  -1   82.79   16.70
  -1 -19  -1    0.10    2.10
   1 -19   1    0.60    1.70
  -1 -19  -1   -0.10    3.90
   1 -19   1   -0.60    2.20
  -1  19  -1   -1.40    2.30
   1  19   1    6.20    4.40
   2 -19   1  189.38   13.10
  -2 -19  -1  175.88   26.50
  -2 -19  -1  186.28   16.80
   2 -19   1  170.58   16.20
  -2  19  -1  187.88   16.80
   2  19   1  177.08   22.40
   3 -19   1    0.70    1.50
  -3 -19  -1   -1.20    2.30
   3 -19   1    3.30    3.40
   3  19   1   -3.00    1.90
  -3  19  -1   -0.60    2.40
  -4 -19  -1   86.09   20.00
   4 -19   1  102.39   18.60
   4  19   1   68.59   13.90
  -5 -19  -1   59.99   17.40
   5 -19   1   80.29   16.40
   5  19   1   99.69   19.00
   6 -19   1   26.30    8.60
  -6 -19  -1   46.00   17.30
   6  19   1   18.70    8.80
   7 -19   1    2.10    3.20
  -5 -20   1    4.70    5.90
   5 -20  -1   14.80    7.20
   5  20  -1   24.00    9.60
  -4 -20   1   -0.70    2.70
   4 -20  -1    2.50    3.20
   4  20  -1   -2.00    1.80
  -4  20   1   -1.00    1.90
  -3 -20   1    2.30    4.10
   3 -20  -1   10.50    4.10
   3 -20  -1    8.30    3.00
  -3  20   1    4.30    4.00
   3  20  -1   -0.80    2.40
   2 -20  -1  292.07   20.10
   2 -20  -1  265.37   15.70
  -2 -20   1  328.07   31.00
   2  20  -1  283.97   22.90
  -2  20   1  269.47   22.00
   1 -20  -1   16.90    7.50
  -1 -20   1   21.30   10.80
  -1 -20   1    3.60    4.60
   1 -20  -1   14.20    5.00
  -1  20   1    3.30    4.70
   1  20  -1   18.60    7.90
   0 -20  -1  153.48   14.00
   0 -20   1  144.49   13.60
   0 -20   1  179.98   25.00
   0 -20  -1  169.38   23.60
   0  20  -1  137.29   18.20
   0  20   1  147.39   20.20
  -1 -20  -1    2.60    4.30
   1 -20   1    3.40    3.00
   1 -20   1    9.20    5.90
  -1  20  -1    7.60    4.80
   1  20   1    8.20    5.40
   2 -20   1   -1.70    1.60
   2 -20   1    3.40    2.50
  -2 -20  -1    7.60    6.30
   2  20   1    7.70    5.10
  -2  20  -1   -0.60    1.90
   3 -20   1    1.10    2.30
   3 -20   1    2.30    2.40
  -3 -20  -1    2.50    4.30
  -3  20  -1   -1.10    1.90
   3  20   1    2.80    3.80
  -4 -20  -1  154.18   35.60
   4 -20   1  101.59   15.80
   4  20   1  107.69   17.70
  -5 -20  -1    0.50    4.00
   5 -20   1   -2.70    1.70
   5  20   1    1.60    3.20
  -2 -21   1   36.80   12.80
   2 -21  -1   32.90    8.30
   2  21  -1   45.70   12.30
  -2  21   1   49.60   12.20
  -1 -21   1   54.49   14.60
   1 -21  -1   57.89    9.60
   1 -21  -1   59.49   15.30
  -1  21   1   70.89   15.00
   1  21  -1   80.19   15.00
   0 -21   1   36.50   11.40
   0 -21  -1   36.20    8.60
   0 -21   1   49.99   10.00
   0 -21  -1   96.79   18.20
   0  21  -1   48.30   11.20
   0  21   1   46.00   11.50
   1 -21   1   13.40    8.00
  -1 -21  -1    4.90    5.10
   1 -21   1    6.90    3.80
  -1  21  -1   10.80    5.80
   1  21   1    8.70    5.60
   2 -21   1  168.78   30.30
  -2 -21  -1  202.38   29.50
   2  21   1  200.38   24.90
  -2  21  -1  145.79   18.60
  15   0  -2    0.50    3.40
  14   0  -2  527.05   37.10
 -13   0   2   -0.20    2.40
  13   0  -2   -0.30    2.80
  13   0  -2   -0.50    2.50
  12   0  -2   75.79   20.80
 -11   0   2    4.10    4.30
  11   0  -2    3.10    3.80
  11   0  -2   -1.00    2.70
 -10   0   2  778.62   42.30
  10   0  -2  739.03   45.10
  10   0  -2  802.12   38.60
  10   0  -2  706.23   34.10
   9   0  -2   -1.30    2.00
  -9   0   2    0.70    2.60
   9   0  -2    2.90    4.50
   9   0  -2   -0.40    1.70
   8   0  -2  940.21   47.00
   8   0  -2 1025.80   41.00
   8   0  -2 1018.40   38.30
   7   0  -2   -1.20    1.40
   7   0  -2   -0.60    2.00
   7   0  -2    0.70    1.80
  -7   0   2    1.30    2.00
  -7   0   2    1.70    1.70
   6   0  -2  178.78   11.70
   6   0  -2  164.58   12.50
  -6   0   2  160.08   10.70
   6   0  -2  183.18   16.30
  -6   0   2  155.88   11.60
  -5   0   2    0.10    1.30
   5   0  -2    1.50    2.70
   5   0  -2    3.70    2.20
   5   0  -2    0.00    1.40
  -5   0   2   -0.70    0.90
  -4   0   2 4450.95  114.09
   4   0  -2 4409.16  115.29
  -3   0   2   -0.70    0.90
   3   0  -2    0.20    1.10
   3   0  -2   -1.00    1.10
  -3   0   2    0.10    0.90
   3   0  -2   -0.40    0.90
  -2   0   2 9646.04  225.68
   2   0  -2 9999.00  226.58
   1   0  -2    2.40    1.00
  -1   0   2    0.10    0.50
  -1   0   2   -0.10    0.40
   1   0  -2    0.80    0.60
   0   0  -2 4062.49   92.69
   1   0   2    0.10    0.70
  -1   0  -2    1.40    0.70
  -1   0  -2   -0.20    0.70
   1   0   2    0.70    0.60
   2   0   2 3620.84   88.49
  -2   0  -2 3652.63   88.49
   3   0   2   -0.40    0.90
   3   0   2    0.40    0.90
  -3   0  -2    0.10    1.30
  -4   0  -2 1638.54   50.99
   4   0   2 1612.44   52.69
  -4   0  -2 1676.63   46.10
  -5   0  -2    2.30    1.60
  -5   0  -2   -0.70    0.90
  -5   0  -2    2.00    2.40
   5   0   2    1.50    1.80
   5   0   2   -0.90    1.30
   6   0   2 1385.26   44.80
  -6   0  -2 1389.26   42.70
   6   0   2 1418.96   53.79
  -6   0  -2 1328.77   43.40
   7   0   2    0.10    1.70
  -7   0  -2   -0.80    0.80
   7   0   2    1.00    2.30
  -7   0  -2   -0.90    0.80
   8   0   2  336.07   20.40
   8   0   2  294.07   24.80
   9   0   2   -0.50    2.00
  -9   0  -2    1.50    2.40
   9   0   2    7.10    4.40
 -10   0  -2 1568.44   62.89
  10   0   2 1396.66   67.69
  10   0   2 1546.45   57.39
 -11   0  -2    4.40    4.70
  11   0   2    2.90    4.10
  11   0   2   -0.80    2.40
  12   0   2  285.17   23.70
  12   0   2  337.37   43.70
  13   0   2    4.20    4.70
 -13   0  -2    0.30    2.60
  14   0   2   71.09   15.90
  15   0   2    0.10    2.70
  15  -1  -2   70.49   16.70
  15   1  -2   91.09   21.60
  14  -1  -2    4.70    5.40
  14   1  -2    5.90    5.80
  13  -1  -2  176.98   25.80
  13  -1  -2  151.08   29.30
  13   1  -2  104.99   25.90
  13   1  -2  171.38   25.60
  12  -1  -2  292.37   39.70
  12  -1  -2  238.38   37.50
  12   1  -2  336.27   49.30
  11  -1  -2   -1.10    2.80
  11  -1  -2   -3.60    1.60
  11   1  -2    3.60    4.40
  11   1  -2    1.70    4.20
 -11   1   2    1.10    2.80
  10  -1  -2  381.26   30.60
  10  -1  -2  339.97   22.00
  10  -1  -2  363.26   25.00
  10   1  -2  326.87   29.80
  10   1  -2  384.06   23.90
  10   1  -2  363.96   25.20
 -10   1   2  385.56   27.40
   9  -1  -2  163.78   22.60
  -9  -1   2  145.59   20.80
   9  -1  -2  166.88   14.00
   9  -1  -2  164.78   19.40
  -9   1   2  159.18   20.00
   9   1  -2  175.48   25.30
   9   1  -2  180.38   16.50
   9   1  -2  180.78   15.20
   8  -1  -2    4.30    3.00
   8  -1  -2    1.50    2.70
   8  -1  -2    2.00    2.80
  -8  -1   2    4.60    5.30
   8   1  -2    1.80    2.60
  -8   1   2    4.40    4.40
   8   1  -2    6.80    4.10
   8   1  -2    0.30    2.30
   7  -1  -2  347.07   23.90
  -7  -1   2  335.57   24.00
  -7  -1   2  310.77   17.10
   7  -1  -2  348.27   20.00
   7  -1  -2  330.87   17.50
  -7  -1   2  327.37   18.80
  -7   1   2  327.57   21.70
   7   1  -2  304.67   17.80
  -7   1   2  331.37   18.30
   7   1  -2  293.47   18.90
   7   1  -2  287.37   23.30
  -7   1   2  310.47   15.80
  -6  -1   2 1504.45   45.80
  -6  -1   2 1503.35   55.89
   6  -1  -2 1470.85   48.00
   6  -1  -2 1425.86   53.39
  -6   1   2 1568.44   44.00
   6   1  -2 1533.25   49.10
   6   1  -2 1532.65   46.90
  -6   1   2 1540.15   52.49
  -6   1   2 1456.55   46.40
   6   1  -2 1409.16   55.69
   5  -1  -2  228.48   16.20
   5  -1  -2  246.68   12.40
   5  -1  -2  255.87   14.30
  -5  -1   2  233.58   17.40
  -5  -1   2  235.28   12.80
   5   1  -2  242.28   14.30
  -5   1   2  227.28   11.50
   5   1  -2  236.08   17.70
   5   1  -2  221.58   12.80
  -5   1   2  230.68   15.60
  -5   1   2  242.48   13.40
  -4  -1   2 1701.53   54.49
   4  -1  -2 1680.33   51.59
  -4  -1   2 1733.13   47.50
  -4   1   2 1626.54   50.39
  -4   1   2 1624.64   46.50
   4   1  -2 1616.84   53.89
   4   1  -2 1661.73   47.80
   3  -1  -2   28.70    4.80
  -3  -1   2   39.50    7.60
   3  -1  -2   34.20    4.50
  -3  -1   2   41.70    5.90
  -3  -1   2   24.10    4.30
   3  -1  -2   42.20    7.10
   3   1  -2   35.90    5.50
  -3   1   2   34.90    4.30
  -3   1   2   32.50    4.90
   3   1  -2   35.80    8.80
   3   1  -2   34.50    5.00
  -3   1   2   35.90    6.20
   2  -1  -2   33.00    3.80
  -2  -1   2   34.30    4.30
  -2  -1   2   29.60    3.90
   2  -1  -2   17.50    2.80
  -2  -1   2   28.20    6.90
   2   1  -2   20.00    3.00
   2   1  -2   28.40    4.00
  -2   1   2   20.70    3.10
  -2   1   2   29.30    3.50
  -2   1   2   31.90    4.70
   1  -1  -2  941.61   26.40
  -1  -1   2  912.21   25.50
   1   1  -2  909.81   25.60
  -1   1   2  935.01   26.50
   0  -1  -2 3722.43   86.59
   0  -1   2 3687.03   82.79
   0   1  -2 3688.83   82.79
   0   1   2 3614.84   86.29
  -1  -1  -2  145.49    8.10
  -1  -1  -2  155.08    6.60
   1  -1   2  126.59    6.70
   1  -1   2  146.49    4.70
  -1   1  -2  146.69    4.70
   1   1   2  144.29    8.20
   1   1   2  148.99    6.40
  -2  -1  -2  906.81   26.20
  -2  -1  -2  953.90   30.50
   2  -1   2  884.31   27.90
   2   1   2  961.60   31.10
   3  -1   2  579.54   18.50
  -3  -1  -2  545.25   19.30
   3  -1   2  570.34   22.10
  -3  -1  -2  592.14   23.90
   3   1   2  561.34   19.60
  -3   1  -2  551.04   18.00
   3   1   2  533.45   23.90
  -3   1  -2  496.85   20.40
   4  -1   2  201.38   13.80
  -4  -1  -2  207.58   11.40
  -4  -1  -2  278.87   20.10
   4  -1   2  209.38   11.10
  -4  -1  -2  228.78   12.00
  -4   1  -2  208.48   10.40
   4   1   2  216.08   15.60
   4   1   2  208.48   11.70
  -4   1  -2  198.68   10.60
  -4   1  -2  226.38   13.30
   5  -1   2  351.66   16.70
  -5  -1  -2  358.66   16.80
   5  -1   2  370.96   21.40
  -5  -1  -2  395.46   22.20
  -5  -1  -2  354.66   17.30
  -5   1  -2  364.46   19.40
   5   1   2  376.76   23.20
   5   1   2  382.46   18.00
  -5   1  -2  354.16   16.40
  -5   1  -2  365.16   15.80
  -6  -1  -2  809.42   36.40
  -6  -1  -2  763.72   29.20
   6  -1   2  725.13   35.30
  -6  -1  -2  840.42   30.80
   6  -1   2  755.42   29.60
  -6   1  -2  788.72   29.20
   6   1   2  812.42   31.00
  -6   1  -2  807.72   28.10
   6   1   2  781.82   38.40
  -6   1  -2  861.21   34.20
   7  -1   2   59.49   12.50
  -7  -1  -2   40.80    8.30
   7  -1   2   60.89    9.70
  -7  -1  -2   60.79    9.20
  -7  -1  -2   50.69   10.30
   7   1   2   58.99   12.40
  -7   1  -2   53.79    8.10
  -7   1  -2   59.89   12.80
  -7   1  -2   50.59    9.80
   7   1   2   51.69    9.10
  -8  -1  -2  583.54   33.30
   8  -1   2  558.74   34.30
   8  -1   2  580.14   28.70
  -8   1  -2  579.74   26.80
   8   1   2  559.34   28.00
   8   1   2  548.85   35.70
  -8   1  -2  591.74   30.90
   9  -1   2  300.87   20.60
  -9  -1  -2  302.97   24.60
   9  -1   2  322.27   27.10
  -9   1  -2  312.77   22.90
   9   1   2  308.97   21.30
   9   1   2  267.67   26.00
  10  -1   2    5.00    4.40
  10  -1   2   -0.30    3.20
 -10  -1  -2    7.60    5.50
 -10   1  -2   30.80    9.40
  10   1   2   13.40    8.40
  10   1   2    6.80    5.10
  11  -1   2  117.29   17.10
  11  -1   2  116.89   23.10
  11   1   2  149.49   19.70
 -11   1  -2  175.38   24.50
  11   1   2  172.78   33.10
  12  -1   2  350.16   34.10
  12  -1   2  382.46   27.30
  12   1   2  390.26   33.50
  12   1   2  351.56   35.40
 -13  -1  -2    0.10    2.20
  13  -1   2    4.40    5.60
  13  -1   2   -1.50    3.40
 -13   1  -2    0.30    2.80
  13   1   2   -2.30    2.10
  14  -1   2  231.68   29.30
  14   1   2  296.37   26.80
  15  -1   2   45.70   13.20
  15   1   2   39.90   12.00
  15  -2  -2   22.90   10.00
  15   2  -2   44.70   21.60
  14  -2  -2  106.59   21.10
  14   2  -2   81.79   18.40
  13  -2  -2   75.09   15.50
  13  -2  -2   81.39   19.40
  13   2  -2   65.39   16.00
  12  -2  -2   16.80    9.00
  12  -2  -2   42.30   18.60
  12   2  -2   27.30    9.70
  12   2  -2   18.60   10.10
  11  -2  -2  381.86   26.70
 -11  -2   2  311.57   28.90
  11  -2  -2  296.27   28.20
  11   2  -2  371.96   26.80
  11   2  -2  318.47   31.50
 -11   2   2  333.87   25.20
  10  -2  -2  180.28   22.00
  10  -2  -2  149.59   22.80
  10  -2  -2  200.38   16.00
 -10  -2   2  252.17   33.60
 -10   2   2  159.78   20.60
  10   2  -2  169.18   21.20
  10   2  -2  196.28   17.20
  10   2  -2  179.08   27.60
   9  -2  -2  279.77   24.10
   9  -2  -2  294.47   20.90
   9  -2  -2  254.47   17.20
  -9  -2   2  261.87   24.40
   9   2  -2  324.57   21.00
   9   2  -2  336.37   42.20
  -9   2   2  284.37   21.60
   9   2  -2  269.27   20.60
   8  -2  -2  178.18   23.30
  -8  -2   2  168.28   22.80
   8  -2  -2  163.78   12.40
   8  -2  -2  117.69   14.20
  -8  -2   2  129.79   11.70
   8   2  -2  156.58   13.50
   8   2  -2  134.59   20.40
  -8   2   2  155.18   14.60
   8   2  -2  153.18   18.40
   7  -2  -2   87.79   11.40
  -7  -2   2  111.69   18.70
   7  -2  -2  115.29    9.60
  -7  -2   2  130.59   15.00
   7  -2  -2   93.59   14.20
   7   2  -2  123.09   11.10
   7   2  -2   94.39   13.10
  -7   2   2  113.29   10.40
  -7   2   2  119.59    8.80
  -7   2   2  122.39   15.80
   7   2  -2  108.59   16.30
   6  -2  -2  601.24   30.00
   6  -2  -2  632.24   26.90
   6  -2  -2  659.33   24.30
  -6  -2   2  654.03   27.10
  -6  -2   2  690.83   35.10
  -6  -2   2  633.64   25.80
  -6   2   2  633.44   28.40
   6   2  -2  689.33   28.60
   6   2  -2  637.04   34.30
  -6   2   2  680.53   23.20
  -6   2   2  655.23   26.40
   6   2  -2  663.63   27.00
   5  -2  -2 1422.26   40.00
  -5  -2   2 1336.67   42.80
   5  -2  -2 1369.66   43.20
  -5  -2   2 1398.76   42.30
  -5  -2   2 1356.66   51.69
   5  -2  -2 1399.86   47.10
  -5   2   2 1418.76   45.00
  -5   2   2 1421.96   42.70
  -5   2   2 1354.66   38.30
   5   2  -2 1392.36   52.09
   5   2  -2 1398.76   44.30
  -4  -2   2  442.66   18.30
   4  -2  -2  443.26   18.40
   4  -2  -2  443.76   15.80
   4  -2  -2  444.26   20.10
  -4  -2   2  434.36   17.80
   4   2  -2  460.95   19.20
   4   2  -2  446.06   18.30
   4   2  -2  426.76   23.40
  -4   2   2  416.46   14.90
  -4   2   2  394.46   18.20
  -3  -2   2  216.88   10.90
  -3  -2   2  220.58   11.00
   3  -2  -2  218.68   11.70
   3  -2  -2  228.68   11.30
   3  -2  -2  225.48    9.10
  -3  -2   2  222.28   15.00
   3   2  -2  226.78   14.80
   3   2  -2  225.28   11.20
  -3   2   2  195.88   10.40
  -3   2   2  238.48    9.00
  -3   2   2  232.48   11.30
   3   2  -2  233.38   11.60
  -2  -2   2  939.11   26.90
  -2  -2   2  912.01   32.50
  -2   2   2  961.00   26.90
  -1  -2   2  114.99    5.40
   1  -2  -2  120.99    5.60
  -1  -2   2  105.99    5.80
   1   2  -2  120.09    5.60
  -1   2   2  114.49    5.50
  -1   2   2  108.29    5.90
   0  -2  -2    1.60    1.30
   0  -2  -2    2.30    1.10
   0  -2   2    1.30    0.80
   0  -2   2    1.50    0.60
   0   2   2    1.10    1.00
   0   2   2    1.20    1.20
   0   2  -2    3.20    0.80
   1   2   2 1068.69   32.50
  -2  -2  -2  541.05   22.00
   2  -2   2  521.15   17.90
   2  -2   2  547.35   15.60
   2   2   2  555.64   22.70
   2   2   2  545.05   18.40
  -2   2  -2  527.75   17.10
  -2   2  -2  547.95   15.50
   3  -2   2   44.40    6.20
  -3  -2  -2   30.20    4.80
  -3  -2  -2   48.40    8.20
   3  -2   2   46.90    4.20
  -3   2  -2   46.60    5.80
  -3   2  -2   52.99    5.60
   3   2   2   52.99    7.20
   3   2   2   56.59    9.80
  -4  -2  -2   42.30    6.80
  -4  -2  -2   34.60    8.10
   4  -2   2   26.70    5.60
  -4  -2  -2   24.10    4.50
   4  -2   2   27.10    4.90
   4   2   2   28.40    7.70
  -4   2  -2   33.40    5.90
  -4   2  -2   42.90    5.10
  -4   2  -2   32.60    5.10
   4   2   2   28.50    5.20
   5  -2   2 1309.47   46.00
  -5  -2  -2 1364.56   49.80
   5  -2   2 1353.26   40.70
  -5  -2  -2 1330.57   42.30
  -5  -2  -2 1339.37   41.70
  -5   2  -2 1318.07   42.60
   5   2   2 1336.07   51.59
  -5   2  -2 1305.07   38.00
  -5   2  -2 1359.46   40.00
   5   2   2 1302.27   42.40
  -6  -2  -2   28.80    6.60
  -6  -2  -2   35.10    7.00
   6  -2   2   33.90    7.00
  -6  -2  -2   29.80    8.70
   6  -2   2   38.20    8.80
   6   2   2   30.00    9.30
   6   2   2   35.40    7.60
  -6   2  -2   22.60    5.20
  -6   2  -2   27.10    6.20
  -6   2  -2   22.80    5.40
  -7  -2  -2  870.31   34.60
  -7  -2  -2  854.91   33.50
  -7  -2  -2  879.71   41.80
   7  -2   2  887.31   40.90
   7  -2   2  949.31   34.80
  -7   2  -2  873.81   35.80
   7   2   2  903.21   35.70
   7   2   2  852.81   47.50
  -7   2  -2  844.22   30.00
   8  -2   2  188.28   18.70
  -8  -2  -2  217.48   20.20
  -8   2  -2  194.38   14.20
  -8   2  -2  182.48   15.50
   8   2   2  131.69   19.80
   8   2   2  189.78   15.60
   9  -2   2   35.30   10.80
  -9  -2  -2   17.50    7.60
   9  -2   2   45.40   10.10
   9   2   2   39.00   13.50
  -9   2  -2   48.80   10.50
   9   2   2   26.60    8.00
  10  -2   2  156.18   18.60
  10  -2   2  157.68   24.20
 -10  -2  -2  157.08   22.90
  10   2   2  209.98   24.10
  10   2   2  115.39   20.90
  11  -2   2  105.59   17.40
  11  -2   2   97.99   20.00
 -11  -2  -2   97.09   19.90
  11   2   2   66.49   14.20
  11   2   2   64.19   18.70
 -11   2  -2   82.29   15.30
  12  -2   2   73.49   14.50
  12  -2   2   88.69   20.70
  12   2   2   92.09   23.60
  12   2   2   78.89   18.00
  13  -2   2  192.28   32.80
  13  -2   2  219.18   25.30
  13   2   2  235.78   28.70
  14  -2   2   12.50    7.40
  14   2   2   19.90   10.70
  15  -2   2   40.20   12.70
  15   2   2   77.19   28.30
  15  -3  -2  123.09   23.30
  15   3  -2  163.68   36.10
  14  -3  -2    2.80    4.30
  14   3  -2   -4.10    2.00
  13  -3  -2  336.57   32.80
  13  -3  -2  328.07   27.40
  13   3  -2  314.87   27.50
  12  -3  -2    2.70    7.30
 -12  -3   2    0.20    1.90
  12  -3  -2    1.40    3.60
 -12   3   2    1.60    2.60
  12   3  -2    4.80    5.30
  12   3  -2   -1.60    2.60
  11  -3  -2   43.70   13.40
  11  -3  -2  112.69   18.70
 -11  -3   2   74.49   22.00
  11   3  -2   79.59   14.40
  11   3  -2   57.59   16.70
 -11   3   2   88.19   15.10
  10  -3  -2    0.70    2.40
  10  -3  -2   -1.00    2.80
 -10  -3   2    3.80    6.00
  10  -3  -2    6.70    5.50
  10   3  -2    5.60    4.30
 -10   3   2    4.10    3.60
  10   3  -2    5.10    4.80
  -9  -3   2 1636.24   70.59
   9  -3  -2 1665.63   65.79
   9  -3  -2 1682.73   59.69
   9  -3  -2 1748.53   54.59
   9   3  -2 1667.73   60.79
   9   3  -2 1570.54   71.49
  -9   3   2 1581.74   57.19
   9   3  -2 1746.33   59.49
   8  -3  -2   -1.40    1.40
   8  -3  -2    6.30    5.00
  -8  -3   2    0.30    2.30
   8  -3  -2    2.00    2.50
  -8  -3   2    2.20    2.70
  -8   3   2    1.20    2.60
   8   3  -2    0.40    2.60
   8   3  -2    0.10    2.00
   8   3  -2    0.10    2.90
   7  -3  -2 1414.36   48.30
  -7  -3   2 1435.16   47.20
  -7  -3   2 1399.06   59.29
   7  -3  -2 1380.26   52.49
  -7   3   2 1358.46   40.80
   7   3  -2 1492.75   61.09
  -7   3   2 1392.86   46.90
   7   3  -2 1532.45   69.59
  -7   3   2 1438.66   47.90
   7   3  -2 1419.96   48.40
   6  -3  -2   90.29   10.50
   6  -3  -2   94.19    7.50
  -6  -3   2   73.39   14.00
   6  -3  -2   95.29   13.50
  -6  -3   2  100.59   12.00
   6   3  -2  117.99   18.80
  -6   3   2  105.39   12.10
   6   3  -2   91.89    9.30
   6   3  -2   89.79   12.50
   5  -3  -2  307.87   17.60
  -5  -3   2  324.27   16.50
   5  -3  -2  342.17   14.00
   5  -3  -2  328.37   16.80
  -5  -3   2  313.07   22.20
  -5  -3   2  326.77   16.90
   5   3  -2  310.47   17.20
  -5   3   2  324.17   12.60
  -5   3   2  280.87   15.30
   5   3  -2  331.27   26.20
  -5   3   2  310.57   15.50
   4  -3  -2   39.80    4.70
   4  -3  -2   46.30    7.20
  -4  -3   2   29.90    5.30
  -4  -3   2   48.60   10.30
   4  -3  -2   22.60    4.50
  -4  -3   2   35.80    5.80
   4   3  -2   34.20    6.20
   4   3  -2   19.50    4.40
  -4   3   2   37.80    6.40
  -4   3   2   32.30    3.10
   4   3  -2   22.00    7.10
  -4   3   2   43.70    6.10
   3  -3  -2 2712.33   72.89
   3  -3  -2 2628.64   71.29
  -3  -3   2 2596.24   72.39
   3   3  -2 2565.14   72.79
  -2  -3   2 1428.16   40.40
  -1  -3   2 1213.28   34.70
   1  -3  -2 1246.88   36.70
  -1   3   2 1276.47   36.60
   1   3  -2 1218.88   34.80
   0  -3  -2  170.78    8.30
   0  -3  -2  182.38    9.20
   0  -3   2  180.78    7.50
   0  -3   2  191.08    6.70
   0   3   2  189.68    8.60
   0   3   2  182.28    9.20
   0   3  -2  164.28    7.10
   0   3  -2  184.38    6.50
   1  -3   2    3.10    1.00
  -1  -3  -2    5.00    2.30
   1  -3   2    2.00    1.10
  -1   3  -2    1.50    0.90
   1   3   2    2.90    2.00
   1   3   2    5.00    2.00
  -1   3  -2    1.50    0.80
  -2  -3  -2  134.89    8.30
   2  -3   2  141.49    6.20
  -2  -3  -2  154.58   11.20
   2  -3   2  150.38    6.40
   2  -3   2  144.49    7.30
  -2   3  -2  152.48    6.40
   2   3   2  140.79    8.50
   2   3   2  138.29   11.00
  -3  -3  -2 1843.82   51.19
  -4  -3  -2    1.30    1.50
  -4  -3  -2    0.20    1.60
   4  -3   2    2.50    2.30
  -4  -3  -2    5.80    4.80
   4  -3   2    2.10    1.60
  -4   3  -2    1.90    1.50
  -4   3  -2    1.60    1.40
   4   3   2    2.10    2.10
  -4   3  -2   -0.30    1.10
   4   3   2   -0.30    2.10
  -5  -3  -2 3406.56   90.49
   5   3   2 3409.26  102.59
  -6  -3  -2   32.60    6.90
   6  -3   2   28.70    5.80
   6  -3   2   19.40    6.20
  -6  -3  -2   29.20    7.50
  -6  -3  -2   33.60    9.90
  -6   3  -2   28.70    4.70
  -6   3  -2   30.40    6.30
   6   3   2   26.30    6.40
   6   3   2   49.80   12.60
  -6   3  -2   25.30    5.30
   7  -3   2    6.10    4.30
  -7  -3  -2    5.20    4.50
  -7  -3  -2    5.90    3.50
   7  -3   2    7.20    3.70
  -7   3  -2   13.30    4.80
   7   3   2    3.60    4.70
  -7   3  -2    8.40    4.70
   7   3   2   13.50    6.80
  -8  -3  -2   28.60    9.00
   8  -3   2   46.60   11.60
  -8  -3  -2   38.10    7.90
   8   3   2   48.50   13.50
  -8   3  -2   56.49   10.10
   8   3   2   50.79   10.40
  -8   3  -2   36.50    7.90
   9  -3   2  823.52   36.30
   9  -3   2  845.32   44.20
  -9  -3  -2  877.91   46.60
   9   3   2  804.02   38.10
   9   3   2  831.02   49.20
  -9   3  -2  845.82   36.50
  10  -3   2    5.40    4.10
  10  -3   2    0.40    2.50
 -10  -3  -2    2.30    4.10
 -10   3  -2    6.30    4.10
  10   3   2    2.20    3.60
  10   3   2    6.30    6.30
 -11  -3  -2  456.15   39.90
  11  -3   2  439.66   27.80
  11  -3   2  442.06   34.70
 -11   3  -2  433.16   26.80
  11   3   2  406.66   28.40
  11   3   2  388.16   36.70
 -12  -3  -2    0.00    1.90
  12  -3   2    0.50    2.60
  12  -3   2   -0.90    1.90
 -12   3  -2    1.20    1.80
  12   3   2    0.70    3.90
  12   3   2    2.20    4.20
 -13  -3  -2    3.30    4.80
  13  -3   2    3.00    4.60
  13  -3   2    0.50    3.70
  13   3   2    7.70    5.90
  14  -3   2   -0.20    2.10
  14   3   2   11.10    6.20
  15  -3   2   99.99   18.70
  15   3   2  103.39   31.20
  15  -4  -2    4.10    4.60
  15   4  -2   19.00    9.50
  14  -4  -2  223.98   30.00
  14   4  -2  232.48   31.80
  13  -4  -2   96.59   17.90
  13  -4  -2   87.09   21.00
  13   4  -2   72.69   16.60
  12  -4  -2   20.70    9.70
  12   4  -2   28.70   11.90
 -12   4   2   20.00    7.20
  12   4  -2   26.60   12.20
 -11  -4   2  437.16   36.20
  11  -4  -2  430.06   28.50
  11  -4  -2  378.16   30.60
 -11   4   2  397.46   25.00
  11   4  -2  422.56   29.20
  11   4  -2  379.26   35.90
  10  -4  -2  365.36   28.10
  10  -4  -2  366.06   24.80
 -10  -4   2  297.37   29.00
  10   4  -2  344.97   25.20
  10   4  -2  315.27   31.00
 -10   4   2  360.96   21.60
   9  -4  -2   63.49   11.10
  -9  -4   2   90.49   19.30
   9  -4  -2   64.69   10.20
   9  -4  -2   59.29   13.40
   9   4  -2   57.39   13.10
   9   4  -2   55.19   15.20
   9   4  -2   49.99   10.50
  -9   4   2   69.39   10.90
  -8  -4   2  502.35   34.80
   8  -4  -2  456.85   28.00
   8  -4  -2  530.75   22.90
  -8  -4   2  486.85   25.30
   8  -4  -2  501.05   26.40
   8   4  -2  549.54   28.70
   8   4  -2  462.15   34.00
  -8   4   2  505.15   23.70
   8   4  -2  539.45   27.40
  -7  -4   2  621.04   28.10
   7  -4  -2  598.64   28.40
   7  -4  -2  609.04   24.00
  -7  -4   2  654.33   38.40
   7  -4  -2  595.84   30.30
  -7   4   2  651.53   28.10
   7   4  -2  688.33   30.90
   7   4  -2  633.24   29.00
  -7   4   2  646.64   21.70
  -7   4   2  664.03   25.80
   7   4  -2  638.04   38.10
   6  -4  -2    0.60    2.50
   6  -4  -2    0.90    1.70
  -6  -4   2    2.30    3.00
  -6  -4   2   -1.00    1.30
  -6  -4   2    3.20    3.80
   6  -4  -2   -0.50    1.20
   6   4  -2    1.40    2.40
  -6   4   2   -1.60    1.30
  -6   4   2   -0.10    1.20
   6   4  -2    2.90    3.10
  -6   4   2    0.30    1.30
   6   4  -2    0.10    2.70
   5  -4  -2 1520.65   46.70
  -5  -4   2 1618.44   48.70
   5  -4  -2 1602.14   48.40
  -5  -4   2 1629.24   60.39
   5  -4  -2 1570.14   48.50
  -5  -4   2 1614.94   49.20
   5   4  -2 1477.05   57.99
   5   4  -2 1527.15   48.60
  -5   4   2 1557.84   47.50
   5   4  -2 1556.34   49.40
  -5   4   2 1609.34   42.70
   4  -4  -2  124.79    8.60
   4  -4  -2  129.09    8.90
   4  -4  -2  106.49    8.60
  -4  -4   2  118.19    9.20
   4  -4  -2  126.19    6.50
  -4  -4   2  157.38   14.70
   4   4  -2  116.19    9.40
  -4   4   2  110.39    4.90
   4   4  -2  153.58   19.30
   4   4  -2  102.19    8.60
  -4   4   2  114.59    5.60
   3  -4  -2   62.79    7.40
  -3  -4   2   48.60    9.10
  -3  -4   2   56.89    7.30
   3  -4  -2   57.29    3.60
   3  -4  -2   58.49    6.80
  -3  -4   2   60.79    7.50
   3   4  -2   74.79   12.20
   3   4  -2   68.69    8.40
   3   4  -2   63.19    7.90
  -2  -4   2 3056.79   80.49
   2  -4  -2 3063.79   80.29
   2   4  -2 3018.80   80.59
  -2   4   2 3084.29   80.29
  -1  -4   2  153.18    7.70
   1  -4  -2  148.89    8.30
  -1  -4   2  167.68    8.30
   1  -4  -2  152.08    7.40
   1   4  -2  155.28    7.70
  -1   4   2  154.88    6.80
  -1   4   2  156.38    8.40
   0  -4   2  205.88    8.20
   0  -4  -2  213.68   10.80
   0  -4   2  203.88    8.60
   0  -4  -2  214.78   10.20
   0   4   2  199.08   10.50
   0   4  -2  201.98    8.20
   0   4  -2  218.18    8.20
   1  -4   2 4091.29   96.89
  -1  -4  -2 4134.19  104.69
  -1   4  -2 4023.80   96.49
   1   4   2 4201.68  104.49
  -2  -4  -2 1075.19   37.30
  -2  -4  -2 1015.00   31.90
   2   4   2 1001.80   36.90
   2   4   2  995.60   31.60
  -3  -4  -2   74.79    9.10
   3  -4   2   61.59    4.90
  -3  -4  -2   59.99   10.20
   3  -4   2   61.79    4.80
   3  -4   2   64.69    6.10
   3   4   2   58.19    7.70
   3   4   2   75.59   12.50
  -3   4  -2   63.59    3.50
  -4  -4  -2 1302.77   48.70
   4  -4   2 1299.37   37.00
   4  -4   2 1253.37   38.80
  -4  -4  -2 1335.67   40.90
  -4  -4  -2 1221.78   40.40
  -4   4  -2 1270.97   32.80
  -4   4  -2 1244.28   36.30
   4   4   2 1276.87   41.10
   4   4   2 1313.97   49.80
  -4   4  -2 1254.97   34.20
   5  -4   2  478.15   19.40
   5  -4   2  465.45   21.80
  -5  -4  -2  476.65   21.70
  -5  -4  -2  458.75   21.80
  -5  -4  -2  443.36   27.20
  -5   4  -2  450.05   17.30
  -5   4  -2  446.66   15.50
   5   4   2  466.95   22.10
  -5   4  -2  463.25   18.80
   5   4   2  485.05   29.20
  -6  -4  -2   53.99    9.60
  -6  -4  -2   70.39   14.50
  -6  -4  -2   47.60    8.60
   6  -4   2   66.49    9.30
   6  -4   2   50.59    9.90
   6   4   2   37.70    8.20
  -6   4  -2   57.69    7.90
   6   4   2   44.30   11.50
  -6   4  -2   46.20    7.10
  -6   4  -2   47.10    4.50
  -7  -4  -2 1346.37   47.50
   7  -4   2 1400.56   46.10
  -7  -4  -2 1395.76   58.69
   7  -4   2 1429.26   58.09
   7   4   2 1390.46   49.60
  -7   4  -2 1359.76   43.50
  -7   4  -2 1384.76   48.10
   7   4   2 1339.17   60.49
  -8  -4  -2   60.09   11.20
  -8  -4  -2   55.99   14.40
  -8   4  -2   57.39    9.60
   8   4   2   87.99   18.70
  -8   4  -2   60.09    9.80
   8   4   2   67.69   12.60
   9  -4   2  233.78   17.70
  -9  -4  -2  237.08   31.30
   9   4   2  273.67   20.70
  -9   4  -2  271.87   17.50
   9   4   2  302.77   43.80
  10  -4   2  326.57   22.40
 -10  -4  -2  352.06   30.40
  10   4   2  324.77   40.90
  10   4   2  363.66   25.30
 -10   4  -2  335.77   20.80
  11  -4   2   92.09   15.90
 -11  -4  -2   80.09   18.50
  11   4   2   88.39   15.60
  11   4   2   74.69   19.40
 -11   4  -2   98.89   14.30
  12  -4   2   33.60    9.30
  12   4   2   34.30   11.40
  12   4   2   34.10   14.60
  13  -4   2  220.38   39.10
  13  -4   2  229.28   27.30
  13   4   2  204.38   26.10
  14  -4   2   10.00    6.70
  14   4   2   13.60    7.30
  15  -5  -2   43.10   15.90
  15   5  -2   44.30   13.90
  14  -5  -2   18.10    8.90
  14   5  -2   20.80   10.50
  13  -5  -2   13.70    8.10
  13  -5  -2   28.00    9.60
  13   5  -2   32.40   12.50
  12  -5  -2  324.57   29.30
  12  -5  -2  367.46   29.70
  12   5  -2  295.07   26.20
  12   5  -2  336.27   47.10
 -11  -5   2    1.80    4.20
  11  -5  -2    4.90    4.90
  11  -5  -2    4.20    5.00
  11   5  -2    1.90    4.20
  11   5  -2   -4.80    1.60
 -11   5   2    3.00    2.90
  10  -5  -2  403.46   29.20
 -10  -5   2  416.96   35.20
  10  -5  -2  429.96   27.10
 -10   5   2  436.16   21.30
  10   5  -2  369.86   34.40
  10   5  -2  441.76   29.00
   9  -5  -2  142.59   20.30
  -9  -5   2  138.99   24.50
   9  -5  -2  114.99   15.20
   9  -5  -2  121.79   11.10
   9   5  -2  124.69   17.50
   9   5  -2  135.79   24.50
   9   5  -2  142.39   20.70
  -9   5   2  142.89   10.90
  -8  -5   2   36.40   12.80
   8  -5  -2   28.60    8.70
  -8  -5   2   35.20    8.50
   8  -5  -2   23.60    5.50
   8  -5  -2   23.80    7.50
   8   5  -2   26.60    7.10
   8   5  -2   35.80    9.70
   8   5  -2   19.50    9.00
  -8   5   2   18.10    4.70
   7  -5  -2   42.40    6.60
  -7  -5   2   44.60    9.10
  -7  -5   2   38.60   11.50
   7  -5  -2   27.30    7.50
   7  -5  -2   35.00    7.30
  -7   5   2   38.00    7.40
  -7   5   2   32.20    4.30
   7   5  -2   33.90    8.20
   7   5  -2   36.60   12.00
   7   5  -2   38.40    8.40
  -7   5   2   36.40    5.30
   6  -5  -2 1216.48   42.00
   6  -5  -2 1298.07   44.00
  -6  -5   2 1293.57   45.10
  -6  -5   2 1341.77   44.90
   6  -5  -2 1293.77   44.10
   6  -5  -2 1366.76   37.70
  -6  -5   2 1236.88   55.39
  -6   5   2 1239.68   37.80
   6   5  -2 1231.98   55.09
   6   5  -2 1337.27   46.40
  -6   5   2 1335.87   34.10
   6   5  -2 1391.36   45.90
  -5  -5   2   31.20    6.70
  -5  -5   2   17.30    7.50
   5  -5  -2   32.70    4.50
   5  -5  -2   20.00    5.00
   5  -5  -2   37.90    7.00
  -5  -5   2   29.20    6.60
   5  -5  -2   21.60    5.10
   5   5  -2   17.80    5.30
   5   5  -2   29.70    6.30
   5   5  -2   30.20    9.00
  -4  -5   2 1565.14   49.10
  -4  -5   2 1246.18   40.60
   4  -5  -2 1206.28   36.50
   4  -5  -2 1263.47   39.40
   4  -5  -2 1243.58   39.90
   4   5  -2 1225.88   41.10
   3  -5  -2  464.75   18.90
   3  -5  -2  471.55   19.40
  -3  -5   2  446.86   25.60
  -3  -5   2  476.85   19.70
   3  -5  -2  492.85   14.00
  -3  -5   2  484.15   19.80
   3   5  -2  514.45   20.20
   3   5  -2  485.55   20.10
  -3   5   2  490.75   19.30
  -2  -5   2   27.00    4.60
  -2  -5   2   21.30    4.10
   2  -5  -2   35.80    5.70
   2  -5  -2   25.80    2.50
  -2  -5   2   32.00    7.50
  -2   5   2   18.10    3.60
   2   5  -2   32.10    5.10
   2   5  -2   41.40    6.00
  -1  -5   2  226.98   11.60
  -1  -5   2  240.38   14.80
  -1  -5   2  208.08   10.20
   1  -5  -2  216.48   11.00
   1  -5  -2  224.08   10.00
  -1   5   2  222.68   10.90
  -1   5   2  225.08    8.50
   1   5  -2  211.88   10.00
   1   5  -2  193.68    9.60
   0  -5   2 2319.27   60.09
   0  -5  -2 2229.28   64.19
   0   5   2 2281.47   64.29
   0   5  -2 2339.17   59.69
  -1  -5  -2  190.38   10.80
   1  -5   2  200.58    8.10
   1  -5   2  200.28    8.40
  -1  -5  -2  200.08   12.90
   1   5   2  196.68   12.80
  -1   5  -2  188.28    7.00
   1   5   2  190.88   10.70
  -1   5  -2  198.18    9.10
   2  -5   2  531.05   16.00
  -2  -5  -2  484.25   20.20
   2  -5   2  533.15   16.60
  -2  -5  -2  539.45   25.10
   2   5   2  468.05   23.90
  -2   5  -2  510.45   12.70
  -2   5  -2  514.55   16.40
   2   5   2  531.25   20.80
  -3  -5  -2  196.88   15.80
   3  -5   2  210.88    9.90
  -3  -5  -2  193.28   12.30
   3  -5   2  203.78    9.50
   3  -5   2  210.68    9.70
  -3  -5  -2  209.28   12.30
   3   5   2  213.28   16.60
   3   5   2  206.68   12.70
  -4  -5  -2   39.40    6.70
   4  -5   2   54.69    6.80
  -4  -5  -2   75.19   13.70
   4  -5   2   55.99    7.10
   4  -5   2   46.00    6.00
   4   5   2   56.99   10.90
  -4   5  -2   49.20    2.70
   4   5   2   41.50    7.40
  -4   5  -2   51.69    2.90
   5  -5   2 1170.68   35.80
   5  -5   2 1123.09   37.30
   5  -5   2 1102.89   34.40
  -5  -5  -2 1084.49   47.60
  -5  -5  -2 1135.79   39.20
  -5   5  -2 1101.09   34.80
  -5   5  -2 1097.19   29.70
   5   5   2 1115.49   39.90
   5   5   2 1035.00   47.90
  -5   5  -2 1111.29   28.60
   6  -5   2  912.21   32.50
  -6  -5  -2  885.01   35.40
  -6  -5  -2  894.71   36.00
   6  -5   2  904.41   35.60
  -6  -5  -2 1004.80   46.40
  -6   5  -2  920.01   27.70
  -6   5  -2  956.20   32.40
   6   5   2  954.40   40.90
   6   5   2  902.21   45.90
  -6   5  -2  893.51   25.80
   7  -5   2   13.50    5.50
  -7  -5  -2   19.80    5.70
  -7  -5  -2   20.10    7.60
   7  -5   2   28.60    6.90
   7   5   2   18.20    8.10
   7   5   2   15.00    6.30
  -7   5  -2   21.80    4.50
   8  -5   2  703.83   35.90
  -8  -5  -2  754.22   43.30
  -8  -5  -2  673.13   32.30
  -8   5  -2  762.32   30.80
   8   5   2  740.23   35.10
  -8   5  -2  739.73   26.90
   8   5   2  674.43   43.60
  -9  -5  -2  110.29   20.50
   9  -5   2  123.79   19.10
   9  -5   2  132.59   16.50
  -9   5  -2  132.89   10.60
   9   5   2  138.99   18.60
   9   5   2  181.68   29.50
  10  -5   2   -0.80    1.60
 -10  -5  -2   -0.60    2.00
  10  -5   2    6.20    4.30
 -10   5  -2    3.60    3.30
  10   5   2    4.50    3.80
  10   5   2   -0.50    2.50
  11  -5   2  220.58   24.50
  11  -5   2  191.98   27.80
 -11  -5  -2  199.68   31.60
 -11   5  -2  158.78   13.10
  11   5   2  155.38   28.70
  11   5   2  232.18   29.30
  12  -5   2  407.46   27.70
  12  -5   2  363.96   32.40
  12   5   2  435.76   31.10
  12   5   2  359.36   45.80
  13  -5   2    9.50    7.90
  13  -5   2    8.40    6.20
 -13  -5  -2    0.30    2.60
  13   5   2    8.90    6.10
  14  -5   2  331.37   27.30
  14   5   2  308.37   28.40
  14  -6  -2  421.96   32.30
  14   6  -2  363.96   31.90
  13  -6  -2    1.20    3.60
 -13  -6   2    0.10    2.80
  13   6  -2    0.90    3.70
  12  -6  -2   48.90   13.40
  12  -6  -2   72.59   15.70
  12   6  -2   77.09   16.50
  11  -6  -2    2.30    3.40
 -11  -6   2    2.10    3.80
  11  -6  -2   -0.10    2.70
  11   6  -2    0.80    3.60
 -10  -6   2  194.18   31.80
  10  -6  -2  199.28   18.00
  10  -6  -2  161.38   22.20
  10   6  -2  190.88   31.60
  10   6  -2  234.48   28.00
  -9  -6   2   -1.10    2.10
   9  -6  -2    3.50    3.70
   9  -6  -2    4.80    4.40
   9  -6  -2    3.00    2.60
   9   6  -2   -4.10    1.40
   9   6  -2    5.50    6.10
  -8  -6   2  500.45   26.80
  -8  -6   2  474.85   35.60
   8  -6  -2  473.45   26.60
   8  -6  -2  473.15   25.90
   8  -6  -2  493.75   20.80
   8   6  -2  462.45   27.60
   8   6  -2  439.06   34.50
  -7  -6   2   75.49   16.90
  -7  -6   2   98.09   13.90
   7  -6  -2   77.49   11.60
   7  -6  -2   81.79   11.60
   7  -6  -2   72.89    6.60
   7   6  -2   90.59   13.00
   7   6  -2   99.19   19.70
   7   6  -2   81.79   13.50
   6  -6  -2  258.87   16.30
  -6  -6   2  259.67   16.80
  -6  -6   2  332.77   32.50
   6  -6  -2  241.18   15.10
  -6  -6   2  243.18   16.60
   6  -6  -2  252.17   15.20
   6   6  -2  231.78   16.30
   6   6  -2  242.58   22.20
   5  -6  -2  112.09    8.40
  -5  -6   2   77.59   14.70
  -5  -6   2  172.98   24.40
   5  -6  -2  106.49    9.30
   5  -6  -2  108.39    9.80
   5  -6  -2  113.19    6.20
  -5  -6   2   92.99    9.40
   5   6  -2  101.79   16.10
   5   6  -2   91.29   11.20
   5   6  -2  111.39   10.30
  -4  -6   2  897.21   32.40
  -4  -6   2  878.81   41.40
   4  -6  -2  891.81   30.90
   4  -6  -2  853.11   31.20
   4   6  -2  872.21   32.50
   4   6  -2  922.71   32.70
   4   6  -2  897.51   40.70
  -3  -6   2   14.10    5.50
   3  -6  -2   24.80    2.20
  -3  -6   2   31.40    6.10
   3  -6  -2   17.30    4.30
  -3  -6   2   26.30    5.90
   3   6  -2   29.50    5.90
  -3   6   2   21.30    4.50
   3   6  -2   18.80    4.60
   2  -6  -2 4353.26  113.59
  -2  -6   2 4298.47  113.49
   2   6  -2 4361.16  113.69
  -2   6   2 4491.95  113.69
  -1  -6   2  546.65   25.10
  -1  -6   2  507.25   19.00
   1  -6  -2  509.45   20.10
   1  -6  -2  563.34   19.30
  -1  -6   2  547.85   19.20
   1   6  -2  538.65   18.70
  -1   6   2  510.75   19.90
   1   6  -2  515.35   18.90
   0  -6  -2 1571.64   45.20
   0  -6   2 1571.44   42.40
   0   6   2 1609.04   45.20
   1  -6   2    0.80    1.00
  -1  -6  -2   -1.10    1.40
  -1  -6  -2    0.00    1.40
   1   6   2    0.20    1.80
  -1   6  -2    1.60    0.80
  -1   6  -2    1.80    1.50
   1   6   2    2.00    1.90
  -2  -6  -2  167.18   11.20
   2  -6   2  184.88    7.80
  -2  -6  -2  168.38   13.80
   2  -6   2  164.98    8.50
   2   6   2  171.08   13.90
   2   6   2  176.78   11.40
  -2   6  -2  178.08    8.60
   3  -6   2   61.09    6.70
  -3  -6  -2   38.10    5.90
  -3  -6  -2   46.20    9.10
   3  -6   2   51.79    4.40
  -3  -6  -2   30.40    5.80
   3  -6   2   55.39    6.40
   3   6   2   54.89   11.30
   3   6   2   48.80    7.50
   4  -6   2 2234.88   58.09
  -4  -6  -2 2179.68   63.29
  -4  -6  -2 2310.97   75.19
  -4  -6  -2 2108.19   63.99
   4   6   2 2133.09   73.99
  -5  -6  -2  169.48   13.40
  -5  -6  -2  135.99   11.80
   5  -6   2  176.78   10.60
   5  -6   2  156.88   10.70
   5  -6   2  155.18   10.50
   5   6   2  165.38   13.30
   5   6   2  183.98   18.30
  -6  -6  -2  363.46   20.70
  -6  -6  -2  395.56   28.30
   6  -6   2  341.37   19.00
   6  -6   2  357.06   17.30
   6  -6   2  359.96   18.10
   6   6   2  391.66   22.10
   6   6   2  314.57   26.30
  -7  -6  -2   -0.20    1.00
   7  -6   2   -0.50    0.90
   7  -6   2   -0.10    1.30
  -7  -6  -2    1.90    3.30
   7  -6   2    0.20    1.80
  -7   6  -2    0.90    1.20
   7   6   2    1.60    3.40
   7   6   2   -1.30    1.60
  -8  -6  -2  285.07   20.20
  -8  -6  -2  368.36   29.90
   8  -6   2  314.17   21.60
   8  -6   2  333.07   22.70
   8   6   2  330.07   22.60
   8   6   2  345.17   30.70
  -8   6  -2  298.17   18.20
  -8   6  -2  321.57   13.10
   9  -6   2    7.30    4.90
   9  -6   2    5.60    4.10
  -9  -6  -2   -0.30    3.60
  -9   6  -2    5.20    2.10
   9   6   2    8.60    5.30
   9   6   2    6.00    5.00
  10  -6   2  778.52   37.30
 -10  -6  -2  889.31   52.39
  10  -6   2  844.22   44.40
  10   6   2  905.71   43.30
  10   6   2  827.92   54.89
 -11  -6  -2    1.30    3.00
  11  -6   2    4.80    4.60
  11  -6   2    6.30    6.00
  11   6   2    2.50    5.60
  11   6   2   18.80    8.10
  12  -6   2   95.89   17.20
  12  -6   2   97.89   20.60
  12   6   2   91.19   16.60
  13  -6   2    0.40    2.00
 -13  -6  -2    2.00    4.10
  13  -6   2    3.30    5.00
  13   6   2    3.30    4.00
  14  -6   2   31.60   11.10
  14   6   2   50.09   15.10
  14   7  -2   21.20   11.70
  13  -7  -2   75.49   16.10
  13   7  -2  142.79   25.00
  12  -7  -2   96.29   17.30
  12   7  -2  120.09   21.50
 -11  -7   2   11.30    7.80
  11  -7  -2    9.00    5.80
  11  -7  -2    9.50    5.50
  11   7  -2    8.40    6.10
  10  -7  -2  252.47   21.60
 -10  -7   2  302.07   38.60
  10  -7  -2  303.27   22.50
  10   7  -2  272.07   57.39
  10   7  -2  335.67   25.50
   9  -7  -2  309.67   21.80
  -9  -7   2  293.97   29.70
   9  -7  -2  239.48   19.60
   9   7  -2  357.56   50.89
   9   7  -2  328.37   24.10
  -8  -7   2    1.80    3.70
  -8  -7   2   -0.40    3.00
   8  -7  -2    9.40    4.80
   8  -7  -2    7.90    3.20
   8  -7  -2    2.80    3.20
   8   7  -2   17.00    9.00
   8   7  -2    2.10    3.00
   7  -7  -2  334.37   18.90
  -7  -7   2  278.17   19.40
  -7  -7   2  354.26   29.70
   7  -7  -2  324.97   14.30
   7  -7  -2  307.87   19.50
   7   7  -2  333.87   21.90
   7   7  -2  333.97   21.30
  -6  -7   2  567.84   26.90
   6  -7  -2  563.84   23.10
   6  -7  -2  590.14   18.80
   6  -7  -2  579.84   26.40
  -6  -7   2  551.64   36.00
   6  -7  -2  537.35   24.70
   6   7  -2  521.65   26.40
   6   7  -2  507.65   26.70
   6   7  -2  480.05   33.30
  -5  -7   2   86.09   11.20
  -5  -7   2  132.99   22.00
   5  -7  -2  119.89   13.90
  -5  -7   2  108.89   13.50
   5  -7  -2   86.89    5.00
   5  -7  -2  115.99   16.80
   5   7  -2   75.59   10.30
   5   7  -2   73.69   15.00
   5   7  -2   74.09   11.20
   4  -7  -2  965.40   33.90
   4  -7  -2  932.91   32.90
  -4  -7   2  927.81   44.20
  -4  -7   2  906.61   33.90
  -4  -7   2  928.61   34.40
   4  -7  -2  944.41   23.90
   4   7  -2  936.81   34.70
   4   7  -2  960.60   34.20
   3  -7  -2 1109.79   27.50
   3  -7  -2 1039.10   35.30
  -3  -7   2 1119.39   46.70
  -3  -7   2 1072.59   36.20
  -3  -7   2 1123.79   36.50
   3   7  -2 1030.40   35.30
   3   7  -2 1100.59   36.70
  -3   7   2 1069.09   35.10
  -2  -7   2   31.30    5.60
   2  -7  -2   28.60    5.30
  -2  -7   2   17.90    5.80
   2  -7  -2   33.10    4.40
  -2  -7   2   26.30    5.20
   2   7  -2   27.00    5.10
  -2   7   2   39.90    6.60
   2   7  -2   24.80    4.90
  -1  -7   2  902.41   36.30
   1  -7  -2  882.11   30.50
  -1  -7   2  903.41   28.90
  -1  -7   2  891.61   29.20
   1  -7  -2  917.91   29.50
   1   7  -2  926.61   29.20
  -1   7   2  921.61   30.50
   1   7  -2  927.01   28.10
   0  -7  -2 1609.54   49.00
   0  -7   2 1656.73   44.60
   0  -7  -2 1688.83   47.70
   0   7   2 1499.75   46.30
   0   7   2 1598.94   47.00
   1  -7   2   33.80    5.00
  -1  -7  -2   27.00    5.40
   1  -7   2   23.40    3.50
  -1  -7  -2   29.40    7.10
  -1   7  -2   24.90    4.20
   1   7   2   26.00    6.70
   1   7   2   22.20    5.00
  -2  -7  -2 1220.68   45.40
  -2  -7  -2 1212.58   37.80
  -2  -7  -2 1127.69   38.70
   2  -7   2 1148.19   33.90
   2   7   2 1209.88   39.20
   2   7   2 1176.88   44.50
  -2   7  -2 1223.28   34.00
  -3  -7  -2   19.70    5.30
  -3  -7  -2   23.60    7.80
  -3  -7  -2   14.60    4.00
   3  -7   2   24.60    3.80
   3  -7   2   23.40    4.30
   3  -7   2   25.70    4.70
   3   7   2   24.60    6.20
   3   7   2   24.10    6.80
  -4  -7  -2   79.19   10.20
   4  -7   2   81.99    6.90
  -4  -7  -2   98.59   15.90
   4  -7   2   89.89    6.50
   4  -7   2   79.29    7.00
  -4  -7  -2  134.39   15.20
   4   7   2  104.59   17.30
   4   7   2   86.09   10.80
  -5  -7  -2  708.93   30.90
   5  -7   2  747.83   26.60
  -5  -7  -2  743.33   32.10
   5  -7   2  774.72   27.70
   5  -7   2  766.92   27.10
  -5  -7  -2  788.72   41.00
   5   7   2  757.62   40.80
  -6  -7  -2  523.05   34.00
  -6  -7  -2  524.55   25.90
   6  -7   2  459.35   20.90
   6  -7   2  488.95   22.00
   6  -7   2  497.25   22.70
   6   7   2  471.55   25.80
   7  -7   2   20.10    6.20
   7  -7   2   18.00    4.90
  -7  -7  -2    2.70    5.60
  -7  -7  -2   15.00    5.20
   7  -7   2   25.20    6.30
   7   7   2   22.90    9.70
   7   7   2   25.80    7.40
  -8  -7  -2  471.35   26.90
   8  -7   2  425.36   23.10
  -8  -7  -2  509.95   36.60
   8  -7   2  443.36   26.00
   8   7   2  383.86   33.80
   8   7   2  450.65   27.30
   9  -7   2  298.57   22.60
   9  -7   2  291.27   19.90
  -9  -7  -2  289.47   28.60
   9   7   2  322.57   23.80
   9   7   2  243.68   31.60
 -10  -7  -2    0.50    3.60
  10  -7   2    2.40    3.90
  10  -7   2    2.60    3.70
  10   7   2   -0.20    3.50
  11  -7   2  227.98   25.00
  11  -7   2  202.98   27.00
 -11  -7  -2  177.48   28.20
  11   7   2  226.68   28.50
  12  -7   2  264.67   22.00
  12  -7   2  249.48   32.70
  12   7   2  233.98   29.50
  13  -7   2    6.00    6.00
  13  -7   2    6.20    5.50
 -13  -7  -2    3.90    6.40
  13   7   2    0.10    2.90
  14  -7   2  169.48   23.80
  14  -8  -2   27.30    9.90
  14   8  -2   27.20   10.50
  13  -8  -2   82.89   17.40
  13   8  -2   98.09   18.70
 -12  -8   2    0.00    2.20
  12  -8  -2    6.80    5.10
  12   8  -2    5.10    5.70
 -11  -8   2  390.36   37.80
  11  -8  -2  389.56   27.30
  11   8  -2  343.17   27.80
  10  -8  -2   13.50    6.50
 -10  -8   2   13.00   10.40
  10   8  -2   23.00    8.80
   9  -8  -2   41.90   10.50
  -9  -8   2   33.40   13.30
   9  -8  -2   33.60    8.90
   9   8  -2   31.20   10.00
  -8  -8   2  123.99   17.40
   8  -8  -2  123.79   15.70
  -8  -8   2   95.69   18.50
   8   8  -2  149.88   20.10
   8   8  -2  126.69   28.80
   7  -8  -2  108.99    7.30
  -7  -8   2  126.59   23.90
  -7  -8   2  111.59   14.60
   7  -8  -2   92.09   13.00
   7   8  -2   96.29   14.20
   7   8  -2  138.39   24.20
  -6  -8   2    3.60    4.90
   6  -8  -2   10.80    4.30
  -6  -8   2   10.40    4.20
   6  -8  -2   12.90    2.80
   6  -8  -2   10.60    4.50
   6   8  -2   19.60    6.50
   6   8  -2   18.70    8.60
   6   8  -2   14.00    6.00
   5  -8  -2 1104.29   39.70
   5  -8  -2 1148.19   28.50
  -5  -8   2 1069.09   52.39
  -5  -8   2 1052.99   40.10
   5  -8  -2 1090.19   38.80
  -5  -8   2 1016.90   40.00
   5   8  -2 1116.39   44.90
   5   8  -2 1373.56   60.79
   4  -8  -2  261.97   17.20
  -4  -8   2  272.57   16.40
  -4  -8   2  264.07   17.70
   4  -8  -2  270.47    8.20
   4  -8  -2  233.88   15.10
  -4  -8   2  230.48   21.20
   4   8  -2  271.07   16.20
   4   8  -2  238.98   15.90
   3  -8  -2  873.71   23.50
  -3  -8   2  881.81   32.00
   3  -8  -2  886.31   31.80
  -3  -8   2  867.81   41.50
  -3  -8   2  886.61   32.40
  -3   8   2  839.52   30.70
   3   8  -2  897.21   32.60
   2  -8  -2  620.84   24.40
  -2  -8   2  546.05   23.30
   2  -8  -2  605.44   20.20
  -2  -8   2  583.64   23.30
  -2  -8   2  606.74   31.40
   2   8  -2  598.94   23.90
  -2   8   2  597.44   23.70
   2   8  -2  576.84   22.50
  -1  -8   2  142.69    9.40
   1  -8  -2  149.29   10.10
   1  -8  -2  146.99   10.60
  -1  -8   2  127.59    9.30
  -1  -8   2  133.79   12.90
   1   8  -2  151.38    8.90
   1   8  -2  142.29    9.60
  -1   8   2  142.59   10.30
   0  -8   2   37.00    7.50
   0  -8  -2   37.40    7.50
   0  -8  -2   41.90    6.70
   0  -8   2   33.90    5.70
   0   8  -2   38.00    5.70
   0   8   2   32.30    5.90
   0   8   2   35.80    6.10
  -1  -8  -2 2450.25   67.59
   1  -8   2 2384.16   62.59
   1   8   2 2324.27   69.89
  -2  -8  -2  247.58   15.40
  -2  -8  -2  279.77   19.60
   2  -8   2  272.97   12.90
  -2  -8  -2  271.47   14.80
   2  -8   2  263.37   10.60
   2   8   2  242.28   15.10
  -2   8  -2  280.37   12.70
   2   8   2  282.57   19.30
  -3  -8  -2  138.09   11.00
   3  -8   2  171.48    9.90
   3  -8   2  154.88    7.70
  -3  -8  -2  154.78   15.60
  -3  -8  -2  130.89   11.50
  -3   8  -2  138.19    9.00
   3   8   2  165.78   12.70
  -4  -8  -2  238.38   16.40
   4  -8   2  221.08   12.60
  -4  -8  -2  203.78   14.60
  -4  -8  -2  236.78   20.70
   4  -8   2  229.28   10.60
   4  -8   2  226.58   12.40
   4   8   2  242.08   16.80
   4   8   2  226.98   20.30
  -5  -8  -2  693.23   39.70
  -5  -8  -2  725.23   31.70
   5  -8   2  763.82   25.80
   5  -8   2  750.82   27.20
   5  -8   2  749.53   27.60
   5   8   2  716.13   40.70
   5   8   2  748.43   32.80
   6  -8   2  156.68   11.30
  -6  -8  -2  245.88   37.00
   6  -8   2  157.78   11.50
  -6  -8  -2  168.08   14.40
   6  -8   2  172.98   12.40
   6   8   2  200.58   22.00
   6   8   2  157.58   24.90
  -7  -8  -2  715.13   34.00
  -7  -8  -2  691.23   43.30
   7  -8   2  758.42   31.30
   7  -8   2  731.13   30.40
   7  -8   2  734.23   29.30
   7   8   2  752.12   35.90
   7   8   2  660.13   43.70
  -8  -8  -2    9.30    4.80
   8  -8   2    4.90    3.60
   8  -8   2   14.30    5.90
  -8  -8  -2   13.00    7.30
   8   8   2    1.10    3.30
   9  -8   2  217.48   18.60
   9  -8   2  208.98   16.60
  -9  -8  -2  206.28   30.60
   9   8   2  217.98   25.80
  10  -8   2   76.39   15.40
  10  -8   2   81.19   13.60
 -10  -8  -2  103.09   23.90
  11  -8   2   70.59   15.30
 -11  -8  -2   79.99   20.50
  11  -8   2   84.29   15.50
  11   8   2   75.19   15.80
 -12  -8  -2    0.30    2.60
  12  -8   2    2.70    3.50
  12  -8   2   10.30    6.70
  12   8   2   11.20    7.40
  13  -8   2  455.95   30.60
  13  -8   2  377.46   34.80
  13   8   2  427.26   33.40
  14  -8   2    5.60    4.70
  14   8   2    2.20    4.20
  14  -9  -2   -1.90    2.10
  14   9  -2    1.30    3.80
  13  -9  -2  168.48   25.40
  13   9  -2  150.88   25.20
  12  -9  -2   37.40   10.70
  12   9  -2   39.10   12.90
  11  -9  -2    6.40    5.60
 -11  -9   2    6.60    8.20
  11   9  -2   12.30    6.90
 -10  -9   2   16.20   11.40
  10  -9  -2   11.10    5.90
  10   9  -2   21.20   14.30
  -9  -9   2  837.22   54.89
   9  -9  -2  731.33   36.40
   9   9  -2  748.53   39.70
   8  -9  -2   69.79   13.40
   8   9  -2   46.40   10.80
   7  -9  -2  847.82   35.80
  -7  -9   2  793.62   36.90
  -7  -9   2  772.42   49.20
   7   9  -2  834.12   38.40
  -6  -9   2   24.60    8.10
   6  -9  -2   25.60    3.40
  -6  -9   2   27.10   11.10
   6  -9  -2   22.70    6.30
   6   9  -2   18.50    6.30
   5  -9  -2   15.20    5.20
   5  -9  -2   12.00    2.00
  -5  -9   2   14.60    7.90
  -5  -9   2    9.50    5.50
   5   9  -2   14.80    5.20
  -4  -9   2  111.19   13.60
  -4  -9   2  113.19   10.70
   4  -9  -2  112.39   10.10
  -4  -9   2  102.89   18.70
   4   9  -2  111.89   13.20
  -4   9   2  109.79   10.10
   4   9  -2  112.69   10.40
  -3  -9   2 1057.19   36.60
   3  -9  -2 1034.20   27.80
  -3  -9   2 1020.00   47.00
  -3  -9   2  955.50   39.00
  -3   9   2  993.40   35.30
   3   9  -2  992.10   36.50
   2  -9  -2   98.29    7.30
  -2  -9   2  113.09    9.30
   2  -9  -2  104.99   12.00
  -2  -9   2   99.79   15.00
  -2  -9   2  106.29    9.50
  -2   9   2  101.29    9.10
   2   9  -2  105.19    9.30
   1  -9  -2  639.34   25.30
   1  -9  -2  644.04   26.10
  -1  -9   2  654.63   24.10
  -1  -9   2  700.23   32.70
  -1  -9   2  601.34   24.60
  -1   9   2  631.44   25.70
   1   9  -2  622.94   24.50
   0  -9   2   28.40    5.50
   0  -9   2   25.80    7.10
   0  -9   2   22.60    4.50
   0  -9  -2   26.80    6.70
   0  -9  -2   25.00    5.60
   0   9   2   25.40    6.00
   0   9  -2   19.60    4.50
   1  -9   2    7.00    2.90
  -1  -9  -2   11.00    5.10
   1  -9   2    9.80    2.80
  -1  -9  -2    6.80    2.90
   1   9   2    7.40    3.60
  -1   9  -2    9.50    3.20
   1   9   2    9.20    4.00
  -2  -9  -2   16.20    6.90
  -2  -9  -2   14.90    4.50
   2  -9   2   15.00    3.10
  -2  -9  -2    9.20    3.80
   2  -9   2   26.10    5.00
   2   9   2   11.60    4.10
  -2   9  -2   17.00    4.20
   2   9   2   13.50    5.20
   3  -9   2  821.82   28.50
  -3  -9  -2  814.52   33.60
   3  -9   2  843.62   24.50
  -3  -9  -2  867.01   41.20
  -3  -9  -2  841.22   32.20
  -3   9  -2  870.91   28.40
   3   9   2  851.11   33.90
   3   9   2  754.92   38.40
  -4  -9  -2    4.20    2.80
   4  -9   2   11.30    4.00
  -4  -9  -2    5.10    4.20
   4  -9   2   11.00    3.60
   4  -9   2   13.20    3.00
   4   9   2    0.80    2.20
   4   9   2    5.50    4.40
   5  -9   2  831.22   30.10
   5  -9   2  842.32   27.20
   5  -9   2  856.71   30.90
  -5  -9  -2  821.42   35.50
  -5  -9  -2  798.72   44.10
   5   9   2  846.52   36.50
   6  -9   2  326.27   16.60
   6  -9   2  363.36   18.90
  -6  -9  -2  379.66   31.80
  -6  -9  -2  342.67   21.80
   6   9   2  325.27   22.00
   7  -9   2   26.80    6.40
   7  -9   2   36.70    9.40
   7  -9   2   31.40    7.00
  -7  -9  -2   23.10    7.40
   7   9   2   24.30    7.90
   8  -9   2   93.19   13.10
   8  -9   2  102.09   14.10
  -8  -9  -2   98.99   18.00
  -8  -9  -2   99.59   21.60
   8   9   2   69.49   12.90
   9  -9   2  560.34   28.50
   9  -9   2  544.35   29.70
  -9  -9  -2  562.94   42.30
   9   9   2  458.15   30.80
  10  -9   2    6.90    4.60
  10  -9   2    9.30    4.80
 -10  -9  -2    5.40    6.70
  10   9   2    0.10    3.30
  11  -9   2  418.46   26.80
 -11  -9  -2  365.36   36.70
  11   9   2  404.16   30.70
  12  -9   2   21.50    8.90
  12   9   2   16.50    7.80
  13  -9   2    3.20    5.10
  13  -9   2    2.60    3.30
 -13  -9  -2   -0.20    3.20
  13   9   2   -1.70    2.30
  13 -10  -2  157.68   24.50
  13  10  -2  122.49   22.40
  12 -10  -2    4.20    3.50
 -12 -10   2    0.00    2.80
  12  10  -2   11.80    7.50
 -11 -10   2   98.19   22.40
  11 -10  -2  124.39   18.40
  11  10  -2  118.79   20.20
  10 -10  -2  171.88   22.20
 -10 -10   2  135.89   26.00
  10  10  -2  176.78   24.50
  -9 -10   2  252.27   38.40
   9 -10  -2  151.28   18.40
  -9 -10   2  106.19   17.20
   9  10  -2  174.48   23.50
  -8 -10   2  633.54   35.10
   8 -10  -2  657.63   32.80
  -8 -10   2  646.34   46.40
   8  10  -2  632.44   34.90
  -7 -10   2  146.49   19.30
  -7 -10   2  143.39   27.70
   7 -10  -2  160.88   19.60
   7  10  -2  146.79   19.50
  -6 -10   2  141.09   25.30
  -6 -10   2  139.39   13.90
   6 -10  -2  156.48   13.70
   6  10  -2  132.49   16.90
  -5 -10   2  553.54   37.50
   5 -10  -2  544.85   26.50
  -5 -10   2  545.85   27.70
   5  10  -2  528.15   27.60
  -4 -10   2  438.46   22.60
  -4 -10   2  379.06   22.50
   4 -10  -2  365.46   20.40
  -4 -10   2  405.96   30.30
   4  10  -2  383.46   21.90
  -3 -10   2   74.29   10.50
  -3 -10   2   79.79   15.20
  -3 -10   2   82.09   11.20
   3 -10  -2   71.79   10.50
   3  10  -2   86.09   11.80
  -3  10   2   56.89    8.60
  -2 -10   2  331.17   18.30
  -2 -10   2  331.67   17.60
  -2 -10   2  297.07   25.80
   2 -10  -2  308.97   17.90
  -2  10   2  336.77   18.00
   2  10  -2  351.06   18.30
  -1 -10   2   53.99   15.40
  -1 -10   2   63.39    8.90
  -1 -10   2   64.59    8.40
   1 -10  -2   51.79    8.80
   1 -10  -2   57.69    5.40
   1  10  -2   59.49    8.50
  -1  10   2   53.39    9.00
   0 -10  -2  413.06   17.60
   0 -10   2  404.56   17.50
   0 -10  -2  365.36   20.10
   0 -10   2  419.16   19.40
   0  10  -2  433.86   19.00
   0  10   2  422.06   20.90
   1 -10   2  940.01   32.50
  -1 -10  -2  911.61   35.90
  -1 -10  -2  942.61   32.70
   1 -10   2  955.90   29.50
  -1 -10  -2  859.71   42.10
   1 -10   2 1014.40   42.50
   1  10   2  996.80   36.20
   1  10   2  919.21   37.00
  -1  10  -2 1019.00   32.40
  -2 -10  -2  197.28   14.50
  -2 -10  -2  192.58   12.90
  -2 -10  -2  185.08   22.60
   2 -10   2  151.48   10.50
   2 -10   2  151.98    8.50
  -2  10  -2  164.88   10.60
   3 -10   2   34.30    4.60
  -3 -10  -2   53.99   13.60
   3 -10   2   39.00    6.90
  -3 -10  -2   22.00    5.90
  -3  10  -2   32.80    6.10
   3  10   2   33.10    7.80
  -4 -10  -2  751.12   41.40
   4 -10   2  756.12   23.30
   4 -10   2  756.32   28.50
   4 -10   2  733.43   27.80
  -4 -10  -2  757.92   32.60
   4  10   2  739.93   33.30
  -5 -10  -2  284.77   21.90
   5 -10   2  279.37   12.80
   5 -10   2  276.07   15.90
   5 -10   2  270.37   15.50
  -5 -10  -2  290.27   26.10
   5  10   2  283.87   20.10
   6 -10   2  334.07   15.90
   6 -10   2  334.17   18.60
  -6 -10  -2  351.56   30.10
  -6 -10  -2  338.57   22.10
   6 -10   2  322.07   17.90
   6  10   2  337.37   23.10
  -7 -10  -2  259.57   20.10
   7 -10   2  238.28   14.90
   7 -10   2  278.57   17.60
   7 -10   2  256.17   18.20
  -7 -10  -2  173.58   25.60
   7  10   2  253.27   20.60
  -8 -10  -2  270.37   38.00
   8 -10   2  173.68   14.80
   8  10   2  198.08   22.90
   9 -10   2   45.30    9.80
   9 -10   2   48.00   10.30
  -9 -10  -2   65.29   19.40
  10 -10   2  360.86   24.60
  10 -10   2  351.46   23.50
 -10 -10  -2  392.46   37.20
  10  10   2  342.17   27.40
 -11 -10  -2    3.50    4.00
  11 -10   2   20.40    7.10
  11 -10   2   18.80    7.50
  11  10   2    5.20    5.00
  12 -10   2   22.10    7.90
  12 -10   2   32.90   10.70
  12  10   2   21.00    8.80
  13 -10   2   91.09   16.40
  13 -10   2   63.79   15.20
  13  10   2   80.09   24.80
  13 -11  -2   22.00    9.20
 -13 -11   2   -0.50    4.10
  13  11  -2   14.60    8.50
  12 -11  -2  310.27   25.80
 -12 -11   2  218.88   33.40
  12  11  -2  332.37   29.20
 -11 -11   2    6.80    9.10
  11 -11  -2    6.80    5.40
  11  11  -2    5.40    5.10
 -10 -11   2  206.18   31.00
  10 -11  -2  263.27   21.90
  10  11  -2  286.67   25.20
   9 -11  -2   67.39   12.50
  -9 -11   2   53.09   11.30
  -9 -11   2   71.39   20.40
  -8 -11   2   -2.40    2.80
   8 -11  -2    2.90    4.00
  -8 -11   2    1.50    3.40
   8  11  -2    3.60    4.40
   7 -11  -2   29.10    8.30
  -7 -11   2   12.50    8.50
  -7 -11   2   30.60    8.70
   7  11  -2   25.80    8.10
   6 -11  -2 1027.20   41.40
  -6 -11   2 1086.69   58.59
  -6 -11   2  986.00   42.80
   6  11  -2 1061.69   44.30
   5 -11  -2    0.70    2.10
  -5 -11   2   -1.50    1.80
  -5 -11   2   -1.70    2.90
   5  11  -2    1.80    2.70
  -4 -11   2  643.24   30.10
  -4 -11   2  732.33   42.90
   4  11  -2  682.43   31.20
  -4  11   2  672.03   29.30
  -3 -11   2  150.38   13.20
   3 -11  -2  176.28    9.50
   3 -11  -2  170.38   19.60
  -3 -11   2  198.28   14.40
   3 -11  -2  175.68    7.80
  -3 -11   2  214.98   27.70
   3  11  -2  221.88   20.10
  -3  11   2  185.58   13.80
  -2 -11   2   91.29   12.70
  -2 -11   2   96.69   17.90
   2 -11  -2   78.19    7.60
  -2 -11   2   79.49   10.40
   2 -11  -2   98.09   12.90
   2 -11  -2   79.79    5.90
   2  11  -2   87.09   11.40
   1 -11  -2   18.50    3.90
   1 -11  -2   15.40    5.20
   1 -11  -2    7.90    3.90
  -1 -11   2   11.20    5.20
   1  11  -2   20.20    5.20
   0 -11   2  931.71   39.60
   0 -11  -2  839.92   34.70
   0 -11  -2  912.11   37.30
   0 -11   2  844.22   32.20
   0 -11  -2  868.21   30.10
   0 -11   2  872.71   30.10
   0  11   2  902.61   38.20
   0  11  -2  884.31   31.80
   1 -11   2    4.90    3.10
   1 -11   2    1.10    1.60
   1 -11   2    0.50    2.50
  -1 -11  -2    0.10    2.20
  -1  11  -2    0.40    1.60
   1  11   2    2.60    2.60
   2 -11   2  949.80   33.50
   2 -11   2  953.10   28.90
   2 -11   2 1023.90   36.50
  -2 -11  -2  978.70   35.70
  -2 -11  -2  914.41   43.30
   2  11   2  874.21   36.70
  -2  11  -2  934.31   32.40
  -3 -11  -2  323.47   19.10
  -3 -11  -2  318.27   25.10
   3 -11   2  290.57   16.10
   3 -11   2  312.97   12.80
  -3  11  -2  298.87   15.70
   3  11   2  284.77   19.30
   4 -11   2   29.80    6.30
  -4 -11  -2   30.70   11.10
   4 -11   2   29.10    4.40
  -4 -11  -2   27.50    7.40
   4 -11   2   27.10    6.40
   4  11   2   26.80    7.70
   5 -11   2   35.80    7.10
   5 -11   2   52.79    6.30
   5 -11   2   49.70    8.90
  -5 -11  -2   40.70    9.50
  -5 -11  -2   43.40   13.30
   5  11   2   53.09   11.40
  -6 -11  -2  947.91   40.60
  -6 -11  -2  984.30   53.39
   6 -11   2  840.32   37.40
   6 -11   2  892.61   34.20
   6 -11   2  847.42   28.60
   6  11   2  889.51   41.00
  -7 -11  -2   27.30   12.40
  -7 -11  -2   12.80    5.50
   7 -11   2   24.10    6.80
   7 -11   2   22.90    5.40
   7  11   2   11.60    6.00
   8 -11   2  425.26   21.70
  -8 -11  -2  435.56   37.60
  -8 -11  -2  403.26   31.70
   8 -11   2  446.56   24.50
   8  11   2  454.15   29.80
   9 -11   2   54.69   10.00
   9 -11   2   63.89   11.70
  -9 -11  -2   45.60   16.00
   9  11   2   81.39   16.70
  10 -11   2    3.80    3.20
 -10 -11  -2    1.70    4.80
  10 -11   2    4.20    3.40
  10  11   2   -0.60    2.50
  11 -11   2   16.00    7.20
  11 -11   2   17.90    7.20
 -11 -11  -2   15.70   12.00
  11  11   2   23.00    9.80
  12 -11   2  249.18   22.20
  12 -11   2  221.88   20.40
  12  11   2  167.38   24.50
  13 -11   2   10.40    6.40
  13  11   2   13.50    8.50
 -12 -12   2   42.90   16.50
  12 -12  -2   57.99   14.30
  12  12  -2   81.99   18.20
  11 -12  -2   29.40    9.10
 -11 -12   2   41.10   17.60
  11  12  -2   45.60   13.20
 -10 -12   2  125.99   25.10
  10 -12  -2  156.88   26.00
  10  12  -2  142.49   21.50
   9 -12  -2   -0.90    2.20
  -9 -12   2   12.60   10.20
   9  12  -2    8.60    5.80
  -8 -12   2  504.95   42.60
   8 -12  -2  478.95   28.50
  -8 -12   2  492.35   30.90
   8  12  -2  543.75   33.00
  -7 -12   2   41.70   10.50
   7 -12  -2   32.70    8.50
  -7 -12   2   28.40   10.70
   7  12  -2   44.00   11.20
   6 -12  -2  107.59   14.30
  -6 -12   2  140.69   26.70
  -6 -12   2  112.19   16.30
   6  12  -2  122.59   17.00
  -5 -12   2  103.69   19.90
  -5 -12   2  120.89   16.60
   5 -12  -2  126.69   15.30
   5  12  -2  115.69   15.30
  -4 -12   2  324.47   28.50
  -4 -12   2  334.47   20.80
   4  12  -2  277.17   19.50
  -4  12   2  295.57   18.80
   3 -12  -2    7.80    2.10
  -3 -12   2    4.60    3.50
   3 -12  -2   10.00    3.10
  -3 -12   2    6.00    5.90
   3  12  -2    3.30    2.90
  -3  12   2   13.80    4.90
  -2 -12   2  985.60   37.90
  -2 -12   2  902.71   35.10
  -2 -12   2  951.70   46.80
   2 -12  -2  976.60   34.00
   2 -12  -2  966.70   29.20
  -2  12   2  935.21   36.50
   2  12  -2  944.81   40.20
  -1 -12   2    8.30    4.00
   1 -12  -2   23.10    6.60
   1 -12  -2    9.00    3.20
  -1 -12   2   13.30    4.70
  -1 -12   2   12.70    6.00
   1  12  -2   14.60    5.20
  -1  12   2    6.10    4.10
   0 -12   2  478.55   28.00
   0 -12  -2  449.66   25.60
   0 -12   2  396.76   21.10
   0 -12   2  472.45   20.40
   0 -12  -2  457.95   20.30
   0  12  -2  487.55   22.20
   0  12   2  444.06   23.30
   1 -12   2  206.48   11.90
   1 -12   2  201.38   16.50
  -1 -12  -2  215.28   14.10
   1 -12   2  191.48   15.30
  -1 -12  -2  194.88   17.80
  -1  12  -2  179.08   12.60
   1  12   2  192.38   15.20
   2 -12   2  578.54   27.20
  -2 -12  -2  631.14   27.40
  -2 -12  -2  617.54   34.90
   2 -12   2  594.74   21.30
  -2  12  -2  605.54   24.90
   2  12   2  579.64   28.80
  -3 -12  -2  101.59   18.60
   3 -12   2   94.19   11.80
  -3 -12  -2   89.99   11.90
   3 -12   2   87.69    6.60
   3 -12   2   86.19    8.80
   3  12   2   89.89   13.00
  -3  12  -2   97.99   11.50
  -4 -12  -2  417.26   24.10
   4 -12   2  411.96   21.00
   4 -12   2  471.45   22.30
  -4 -12  -2  422.76   32.00
   4 -12   2  437.76   16.10
   4  12   2  483.45   26.80
  -5 -12  -2    3.60    4.60
   5 -12   2   13.70    3.10
   5 -12   2    9.20    4.10
   5 -12   2   15.10    5.70
  -5 -12  -2   13.30    5.40
   5  12   2    7.60    4.70
  -6 -12  -2  335.67   23.40
   6 -12   2  362.66   14.70
  -6 -12  -2  286.47   28.80
   6 -12   2  367.16   20.50
   6  12   2  371.56   25.40
  -7 -12  -2   -2.70    2.20
   7 -12   2    1.60    2.70
   7 -12   2    5.40    2.60
  -7 -12  -2    3.10    3.80
   7  12   2    6.90    4.90
  -8 -12  -2  226.88   34.40
  -8 -12  -2  239.68   21.40
   8 -12   2  225.98   17.10
   8 -12   2  202.68   13.10
   8  12   2  172.68   22.00
  -9 -12  -2    4.50    6.80
  -9 -12  -2    2.00    4.30
   9 -12   2    5.20    3.10
   9 -12   2    0.60    2.20
   9  12   2   -2.50    2.10
  10 -12   2  404.96   25.80
  10 -12   2  388.96   23.10
 -10 -12  -2  418.16   40.20
  10  12   2  419.76   31.50
  11 -12   2    2.00    3.20
 -11 -12  -2    0.00    2.70
  11 -12   2   -1.10    1.70
  11  12   2   -2.30    1.80
  12 -12   2   46.70   12.30
 -12 -12  -2   43.00   15.70
  12 -12   2   48.90   11.30
  12 -13  -2   91.99   17.90
  12  13  -2   86.19   20.50
 -11 -13   2   -1.90    3.10
  11 -13  -2    1.00    2.30
  11  13  -2    2.70    5.70
 -10 -13   2   82.19   23.30
  10 -13  -2   63.49   13.60
  10  13  -2   57.59   14.60
   9 -13  -2  143.19   19.90
  -9 -13   2  169.18   32.60
   9  13  -2  187.48   26.20
  -8 -13   2    0.50    2.80
   8 -13  -2    0.30    2.30
  -8 -13   2   -4.30    2.40
   8  13  -2    6.20    5.50
  -7 -13   2  154.58   27.10
  -7 -13   2  161.78   21.40
   7 -13  -2  127.49   16.50
   7  13  -2  159.98   21.00
  -6 -13   2  106.29   21.60
  -6 -13   2  154.58   15.60
   6 -13  -2  163.88   19.30
   6  13  -2  146.79   19.70
  -5 -13   2   18.90    8.80
  -5 -13   2   12.60    5.50
   5 -13  -2   17.50    6.70
   5  13  -2   17.30    6.50
  -4 -13   2  192.98   26.00
  -4 -13   2  223.38   17.10
  -4  13   2  196.48   15.60
   4  13  -2  184.58   16.00
  -3 -13   2  514.85   26.30
  -3 -13   2  594.64   38.40
   3 -13  -2  509.55   17.50
   3 -13  -2  547.65   20.90
  -3  13   2  482.75   25.50
   3  13  -2  548.75   27.50
   2 -13  -2    1.90    2.20
  -2 -13   2   -1.10    2.50
   2 -13  -2    1.70    1.60
  -2 -13   2   -1.80    1.00
   2  13  -2    0.30    2.30
  -2  13   2    3.80    3.40
   1 -13  -2  613.94   28.50
  -1 -13   2  565.14   25.00
   1 -13  -2  545.25   21.80
  -1 -13   2  542.35   33.20
  -1  13   2  547.35   26.90
   1  13  -2  506.35   25.00
   0 -13  -2  177.58   16.10
   0 -13   2  158.78   13.00
   0 -13   2  174.38   12.10
   0 -13   2  172.18   17.00
   0 -13  -2  160.28   11.50
   0  13   2  145.19   13.30
   1 -13   2    3.10    3.80
  -1 -13  -2    1.90    2.30
   1 -13   2    7.20    3.80
  -1 -13  -2    5.90    4.60
   1 -13   2    4.90    2.70
   1  13   2    0.20    2.70
  -1  13  -2    4.10    2.90
   2 -13   2  386.76   22.10
  -2 -13  -2  371.06   27.40
  -2 -13  -2  374.66   21.00
   2 -13   2  388.26   16.60
   2 -13   2  378.56   20.40
  -2  13  -2  387.86   19.70
   2  13   2  372.56   22.90
   3 -13   2  224.78   11.30
  -3 -13  -2  202.08   15.90
   3 -13   2  214.28   14.80
   3 -13   2  238.88   15.30
  -3 -13  -2  253.37   31.80
  -3  13  -2  217.28   14.30
   3  13   2  245.08   18.80
  -4 -13  -2    6.60    5.60
   4 -13   2    3.40    1.90
   4 -13   2    2.70    2.30
  -4 -13  -2    1.10    1.70
   4 -13   2    4.20    2.80
   4 -13   2   -1.00    1.80
   4  13   2    3.60    3.80
   5 -13   2  184.88   14.30
  -5 -13  -2  186.78   16.80
   5 -13   2  196.08    9.30
  -5 -13  -2  229.78   33.40
   5  13   2  202.98   22.80
   6 -13   2  150.78   13.20
  -6 -13  -2  122.79   22.90
  -6 -13  -2  138.59   18.10
   6  13   2  173.68   22.50
   7 -13   2   19.70    6.30
  -7 -13  -2   14.20    7.00
  -7 -13  -2   13.30    9.50
  -8 -13  -2  134.39   20.70
   8 -13   2  122.39   16.00
   8 -13   2  134.69    8.80
  -8 -13  -2  166.28   30.80
   8  13   2  124.19   20.40
  -9 -13  -2  183.48   29.30
   9 -13   2  177.68   16.40
   9 -13   2  225.48   13.30
   9  13   2  201.78   27.20
  10 -13   2    6.80    4.40
 -10 -13  -2    5.10    7.50
  10 -13   2    3.00    2.60
  10  13   2   -0.40    2.90
 -11 -13  -2   70.19   23.30
  11 -13   2   66.19   15.00
  11  13   2   71.89   15.80
 -12 -13  -2   68.09   21.50
  12 -13   2  113.39   17.90
  12  13   2  124.19   23.40
  11 -14  -2  107.59   18.80
  11  14  -2  121.69   21.20
  10 -14  -2    3.30    3.40
 -10 -14   2    7.80    8.10
  10  14  -2    2.70    4.20
  -9 -14   2   80.89   20.60
   9 -14  -2   67.29   14.10
   9  14  -2  102.69   18.90
  -8 -14   2    1.60    3.90
   8 -14  -2    0.10    2.20
  -8 -14   2    1.60    3.90
   8  14  -2   -2.90    2.50
  -7 -14   2   84.89   14.70
  -7 -14   2  125.29   27.80
   7 -14  -2  106.79   16.80
   7  14  -2   96.99   17.80
  -6 -14   2   -4.60    2.20
  -6 -14   2    1.90    2.70
   6 -14  -2    3.80    3.60
   6  14  -2    6.60    5.20
  -5 -14   2  914.71   41.10
  -5 -14   2  821.12   52.69
   5 -14  -2  903.01   40.10
   5  14  -2  965.70   42.10
  -4 -14   2   18.40    9.60
  -4 -14   2   27.20    7.20
   4 -14  -2   27.00    2.70
  -4  14   2   32.00    7.80
   4  14  -2   23.80    7.20
  -3 -14   2   36.30   12.40
   3 -14  -2   28.50    5.90
   3 -14  -2   35.00    5.00
  -3 -14   2   37.70    9.20
  -3  14   2   23.10    7.00
   3  14  -2   31.30    8.40
   2 -14  -2    5.80    2.90
  -2 -14   2    1.90    4.60
   2 -14  -2    1.40    3.00
   2  14  -2   10.30    4.90
  -2  14   2    2.40    2.90
   1 -14  -2  184.28   15.40
   1 -14  -2  179.28   11.70
  -1 -14   2  181.48   13.70
  -1 -14   2  183.98   24.30
   1  14  -2  175.88   14.30
  -1  14   2  186.38   15.40
   0 -14   2    3.90    4.10
   0 -14   2   -0.60    2.00
   0 -14  -2   -0.60    2.10
   0 -14  -2   -0.30    1.50
   0  14  -2   -1.10    1.40
   0  14   2    2.00    2.90
  -1 -14  -2 1242.28   53.99
  -1 -14  -2 1292.87   44.80
   1 -14   2 1424.56   53.19
   1 -14   2 1294.37   41.40
  -1  14  -2 1326.07   45.10
   1  14   2 1357.46   49.99
  -2 -14  -2   19.40    9.10
  -2 -14  -2    7.80    6.00
   2 -14   2   12.00    3.50
   2 -14   2    6.60    3.90
   2  14   2   14.10    5.60
  -2  14  -2   12.20    4.60
  -3 -14  -2   99.89   14.90
  -3 -14  -2   94.29   17.60
   3 -14   2  100.09   13.10
  -3  14  -2   89.19   11.60
   3  14   2   63.89   11.90
   4 -14   2    2.40    2.60
  -4 -14  -2    0.60    2.50
   4 -14   2   -0.30    1.60
   4 -14   2    2.60    1.90
  -4 -14  -2    3.20    5.30
   4  14   2    1.40    3.40
   5 -14   2   65.19    5.60
   5 -14   2   63.09    4.90
   5 -14   2   73.89   11.40
  -5 -14  -2   66.89   12.90
  -5 -14  -2   65.59   17.80
   5  14   2   63.89   13.00
   6 -14   2    4.20    3.10
  -6 -14  -2    2.60    4.40
  -6 -14  -2   -1.60    1.90
   6  14   2   13.10    7.40
  -7 -14  -2  459.95   40.20
  -7 -14  -2  508.25   32.40
   7 -14   2  572.14   28.40
   7  14   2  522.15   33.10
   8 -14   2    2.70    3.30
  -8 -14  -2   -0.40    4.10
   8  14   2    3.10    3.80
  -9 -14  -2   50.09   25.30
   9 -14   2   57.49   11.90
   9  14   2   52.29   13.20
 -10 -14  -2   24.10   13.80
  10 -14   2   21.50    7.60
  10  14   2   11.20    7.80
  11 -14   2   41.80   10.30
 -11 -14  -2   47.60   17.80
  11  14   2   17.40    9.80
  11 -15  -2    6.20    5.20
 -11 -15   2    6.20    8.70
  11  15  -2    9.90    6.40
 -10 -15   2   13.30   10.50
  10  15  -2   18.70    9.60
   9 -15  -2  241.78   27.60
  -9 -15   2  247.38   40.70
   9  15  -2  283.57   25.70
   8 -15  -2   42.90   15.10
  -8 -15   2   31.70   15.00
   8  15  -2   10.80    5.90
  -7 -15   2  288.47   24.00
   7 -15  -2  261.57   21.20
   7  15  -2  255.67   22.70
  -6 -15   2  114.69   23.60
   6 -15  -2  103.19   17.10
   6  15  -2   84.09   15.00
  -5 -15   2    0.30    2.80
  -5 -15   2    3.20    5.90
   5 -15  -2    8.80    4.40
   5  15  -2    5.00    4.20
  -4 -15   2   24.40    7.70
   4 -15  -2   31.10    4.20
   4 -15  -2   31.50    3.00
  -4 -15   2   43.60   15.50
  -4  15   2   47.40   10.40
   4  15  -2   33.40    9.80
   3 -15  -2  389.06   15.40
  -3 -15   2  388.36   23.60
   3 -15  -2  399.46   18.60
  -3 -15   2  407.16   33.40
  -3  15   2  379.46   23.30
   3  15  -2  394.96   24.30
  -2 -15   2    1.00    1.90
  -2 -15   2    3.40    5.10
   2 -15  -2    0.20    2.20
   2 -15  -2   -0.20    1.30
  -2  15   2    0.80    2.90
   2  15  -2   -0.80    2.20
  -1 -15   2  343.47   20.00
  -1 -15   2  376.86   28.70
   1 -15  -2  352.76   22.40
   1 -15  -2  360.86   17.80
   1  15  -2  314.67   20.20
  -1  15   2  296.07   20.70
   0 -15  -2   46.80   11.10
   0 -15  -2   44.40    8.10
   0 -15   2   46.30   12.00
   0 -15   2   54.09    9.20
   0  15  -2   62.79   10.70
   0  15   2   38.50    9.10
   1 -15   2    0.10    3.00
  -1 -15  -2    3.00    2.50
  -1 -15  -2    0.50    3.00
   1 -15   2    1.00    1.90
   1  15   2   -1.90    2.10
  -1  15  -2   -2.00    2.00
   2 -15   2   63.89   12.00
   2 -15   2   71.29    8.90
  -2 -15  -2   47.70   12.50
  -2 -15  -2   62.39   10.80
   2  15   2   66.89   12.70
  -2  15  -2   59.39   10.20
   3 -15   2  588.24   22.30
   3 -15   2  618.34   28.10
  -3 -15  -2  665.13   41.30
  -3 -15  -2  586.24   30.20
  -3  15  -2  590.84   27.10
   3  15   2  575.84   32.00
   4 -15   2   26.10    5.60
  -4 -15  -2   13.80    8.10
   4 -15   2    8.90    4.70
  -4 -15  -2   20.50    6.90
   4 -15   2   18.70    3.80
   4  15   2   27.20    8.50
   5 -15   2  241.68   17.60
  -5 -15  -2  294.97   39.00
  -5 -15  -2  275.07   21.60
   5  15   2  323.97   40.90
   6 -15   2   57.49   10.80
  -6 -15  -2   72.99   23.00
   6  15   2   49.30   12.30
   7 -15   2    0.20    2.20
  -7 -15  -2    2.30    5.20
   7  15   2    2.30    5.00
  -8 -15  -2   80.09   21.90
   8 -15   2   59.89   11.70
   8  15   2   80.09   16.60
   9 -15   2  209.58   18.40
  -9 -15  -2  275.77   43.70
   9  15   2  257.77   31.30
 -10 -15  -2   -1.50    3.20
  10  15   2    3.50    4.10
  10 -16  -2   65.09   14.00
 -10 -16   2   69.09   20.50
  10  16  -2   87.59   25.00
  -9 -16   2   19.80   14.20
   9 -16  -2   20.00    8.00
   9  16  -2   16.00    7.50
   8 -16  -2  176.68   22.50
  -8 -16   2  188.08   33.60
   8  16  -2  188.98   25.80
  -7 -16   2   93.99   22.50
   7 -16  -2   87.49   18.30
   7  16  -2  116.69   18.80
  -6 -16   2   81.99   15.50
   6 -16  -2  103.29   16.90
  -6 -16   2   71.89   18.30
   6  16  -2   90.99   15.50
  -5 -16   2  233.98   34.70
  -5 -16   2  263.07   21.60
   5 -16  -2  316.97   22.80
   5  16  -2  243.48   21.30
  -4 -16   2   57.39   17.60
  -4 -16   2   78.89   13.60
   4  16  -2   76.59   14.20
  -4  16   2   61.19   11.70
  -3 -16   2   11.70    5.20
   3 -16  -2    8.70    3.40
   3 -16  -2   19.10    4.00
   3  16  -2    9.80    5.00
  -3  16   2   16.70    6.90
   2 -16  -2  148.29   13.20
  -2 -16   2  134.59   13.30
   2 -16  -2  142.19   10.00
  -2 -16   2  146.79   35.30
   2  16  -2  141.19   17.80
  -2  16   2  171.08   19.60
   1 -16  -2  108.79   15.70
   1 -16  -2  124.89   10.30
  -1 -16   2  127.49   12.10
  -1 -16   2  157.58   25.00
   1  16  -2  136.99   16.60
  -1  16   2  111.49   15.40
   0 -16  -2  240.38   20.80
   0 -16   2  240.88   22.50
   0 -16  -2  225.18   15.50
   0 -16   2  224.38   15.60
   0  16  -2  229.98   17.10
   0  16   2  258.77   19.60
  -1 -16  -2  234.88   16.80
  -1 -16  -2  237.58   30.40
   1 -16   2  240.28   20.50
   1 -16   2  230.98   14.60
   1  16   2  223.48   18.70
  -1  16  -2  223.78   16.30
  -2 -16  -2  238.48   17.80
   2 -16   2  220.88   13.60
   2 -16   2  244.88   19.10
   2  16   2  214.58   18.90
  -2  16  -2  195.68   15.30
  -3 -16  -2   63.69   12.10
  -3 -16  -2   79.89   21.30
   3 -16   2   56.69   10.40
   3 -16   2   63.09    8.00
   3  16   2   61.39   13.10
  -3  16  -2   64.69   10.80
  -4 -16  -2  207.88   28.90
   4 -16   2  215.98   13.40
  -4 -16  -2  199.48   18.20
   4 -16   2  200.48   10.60
   4 -16   2  222.58   17.10
   4  16   2  148.39   28.60
  -5 -16  -2   54.79   13.10
   5 -16   2   56.29   11.00
  -5 -16  -2   49.00   14.60
   5  16   2   56.69   12.90
   6 -16   2  102.19   14.80
  -6 -16  -2  120.69   26.90
  -6 -16  -2   89.59   22.70
   6  16   2   82.79   15.70
  -7 -16  -2  213.58   33.10
   7 -16   2  217.88   17.70
   7  16   2  234.88   27.40
  -8 -16  -2   36.70   15.80
   8 -16   2   42.30   10.30
   8  16   2   49.30   13.70
   9 -16   2    5.40    4.30
  -9 -16  -2   20.70   12.20
   9  16   2   22.00    8.80
  10 -16   2  117.79   17.00
  10  16   2  136.59   22.80
   9 -17  -2    2.80    3.70
  -9 -17   2    1.10    3.70
   9  17  -2    1.10    3.00
   8 -17  -2   26.70    8.90
  -8 -17   2   16.00   10.80
   8  17  -2   22.00    9.40
  -7 -17   2    7.90    9.70
   7 -17  -2    2.70    3.10
   7  17  -2    4.30    4.90
  -6 -17   2  348.47   46.80
   6 -17  -2  273.97   22.30
   6  17  -2  282.07   24.00
  -5 -17   2    7.50    5.50
  -5 -17   2    0.80    4.00
   5 -17  -2    6.20    6.10
   5  17  -2    0.30    2.50
  -4 -17   2  432.96   37.70
  -4 -17   2  389.56   26.30
   4  17  -2  390.16   26.50
  -4  17   2  451.85   27.00
  -3 -17   2    1.80    2.90
  -3 -17   2    0.40    5.50
   3 -17  -2   -1.50    1.50
   3 -17  -2    2.50    2.10
  -3  17   2    0.40    2.80
   3  17  -2   -1.00    1.90
   2 -17  -2   14.20    5.20
  -2 -17   2   11.00    5.30
  -2 -17   2    6.10    6.30
   2 -17  -2   13.90    4.30
   2  17  -2   13.10    6.30
  -2  17   2   18.30    7.20
  -1 -17   2   12.80    8.60
   1 -17  -2   12.50    5.70
  -1 -17   2    5.90    4.00
   1  17  -2   12.70    5.60
  -1  17   2    8.20    5.00
   0 -17  -2  353.06   25.80
   0 -17   2  323.97   19.40
   0 -17   2  347.07   27.50
   0 -17  -2  340.47   19.60
   0  17  -2  288.77   20.10
   0  17   2  347.17   23.70
  -1 -17  -2   31.90    8.10
   1 -17   2   31.60    7.30
  -1 -17  -2   29.10   10.40
   1 -17   2   26.50    9.30
  -1  17  -2   21.40    6.60
   1  17   2   28.00    8.90
   2 -17   2  271.17   20.60
   2 -17   2  283.27   15.70
  -2 -17  -2  280.87   26.00
  -2 -17  -2  245.98   18.80
  -2  17  -2  251.37   18.00
   2  17   2  328.77   44.00
   3 -17   2   -2.00    1.60
  -3 -17  -2    4.30    6.20
   3 -17   2    1.40    1.70
  -3 -17  -2    2.80    3.70
  -3  17  -2   -0.10    2.20
   3  17   2    2.90    4.20
   4 -17   2    1.40    2.40
  -4 -17  -2    6.20    4.10
   4 -17   2    2.40    1.80
  -4 -17  -2    1.20    4.40
   4 -17   2   -0.70    1.10
   4  17   2   -0.50    4.00
  -5 -17  -2    3.30    5.10
  -5 -17  -2   16.60    9.60
   5 -17   2    8.40    5.20
   5  17   2   12.50    6.80
   6 -17   2  418.06   24.90
  -6 -17  -2  377.16   36.90
   6  17   2  367.16   28.60
  -7 -17  -2   13.60    9.20
   7 -17   2   27.90    8.20
   7  17   2   21.40    9.00
  -8 -17  -2  155.88   33.00
   8 -17   2  211.68   18.40
   8  17   2  241.48   30.00
   9 -17   2    6.40    4.40
  -9 -17  -2    7.60    8.70
   9  17   2   11.70    7.10
  -8 -18   2  129.09   26.70
   8 -18  -2  144.79   21.90
   8  18  -2  189.08   26.50
   7 -18  -2   31.40   10.30
  -7 -18   2   24.00   15.30
   7  18  -2   39.00   11.80
  -6 -18   2   21.10   11.00
   6 -18  -2   25.30    8.70
   6  18  -2   17.30    8.10
  -5 -18   2   63.49   17.80
   5 -18  -2   62.89   13.20
   5  18  -2   53.89   12.20
  -4 -18   2   95.39   22.50
  -4 -18   2   87.49   19.80
  -4  18   2   50.79   11.30
   4  18  -2   73.09   14.70
   3 -18  -2   42.30    6.10
   3 -18  -2   35.80    6.90
  -3 -18   2   47.60   10.60
  -3 -18   2   17.30    9.70
  -3  18   2   44.70   12.50
   2 -18  -2  210.38   16.60
  -2 -18   2  236.28   31.10
   2 -18  -2  226.18   13.80
  -2 -18   2  221.38   17.90
   2  18  -2  245.38   19.60
  -1 -18   2   31.00    8.00
   1 -18  -2   29.80    9.40
   1 -18  -2   32.70    7.20
  -1 -18   2   33.90   11.70
  -1  18   2   39.00   15.80
   1  18  -2   44.80   10.10
   0 -18  -2   76.79   15.50
   0 -18   2   78.79   12.00
   0 -18  -2   61.19   10.70
   0 -18   2   43.90   12.90
   0  18   2   72.59   13.80
   0  18  -2   68.99   12.00
   1 -18   2   59.39    9.80
  -1 -18  -2   64.39   15.30
  -1 -18  -2   63.59   11.50
   1 -18   2   71.29   14.30
   1  18   2   87.39   15.80
  -1  18  -2   82.79   13.10
   2 -18   2  110.19   16.40
   2 -18   2  103.19    9.60
  -2 -18  -2   99.89   14.50
  -2 -18  -2  124.89   23.00
  -2  18  -2   88.39   13.00
   2  18   2  100.09   17.30
   3 -18   2    2.60    2.40
  -3 -18  -2   -0.70    3.40
  -3 -18  -2    0.50    2.00
   3 -18   2   -0.50    2.20
   3  18   2   -2.60    2.10
  -3  18  -2    2.70    3.10
   4 -18   2  164.78    9.50
   4 -18   2  177.98   11.40
   4 -18   2  169.78   19.40
  -4 -18  -2  169.48   27.20
   4  18   2  213.08   26.60
   5 -18   2   21.40    7.40
  -5 -18  -2   33.60   13.40
   5  18   2    7.00    6.10
  -6 -18  -2   51.89   15.70
   6 -18   2   64.49   11.80
   6  18   2   66.59   15.50
   7 -18   2   80.69   13.00
  -7 -18  -2   92.89   24.10
   7  18   2  101.09   20.00
  -8 -18  -2   36.90   14.70
   8 -18   2   42.10   10.30
   8  18   2   85.19   18.20
  -7 -19   2   87.19   23.40
   7 -19  -2   65.69   14.50
   7  19  -2   63.99   14.10
   6 -19  -2   30.40    9.60
  -6 -19   2   37.90   15.70
   6  19  -2   22.00    9.60
  -5 -19   2    6.30    7.70
   5 -19  -2    6.80    4.50
   5  19  -2    1.30    3.40
  -4 -19   2   38.50   14.10
   4  19  -2   57.99   13.00
  -4  19   2   63.09   13.00
  -3 -19   2  226.08   33.00
   3 -19  -2  212.88   13.90
   3 -19  -2  198.18   11.30
   3  19  -2  191.48   23.90
  -3  19   2  212.28   19.20
  -2 -19   2    1.40    3.40
   2 -19  -2    4.90    3.00
   2 -19  -2    0.10    2.30
  -2 -19   2    3.10    5.90
   2  19  -2    3.50    3.70
  -2  19   2    4.30    4.30
   1 -19  -2  109.89   17.20
  -1 -19   2   94.49   14.50
  -1 -19   2   90.09   19.00
   1 -19  -2  102.39   10.30
  -1  19   2   89.79   15.40
   1  19  -2  124.49   19.80
   0 -19  -2   64.19   14.00
   0 -19  -2   64.89   10.90
   0 -19   2   58.49   12.30
   0 -19   2   59.39   15.30
   0  19  -2   69.69   12.60
   0  19   2   52.09   11.80
  -1 -19  -2   -0.30    2.70
   1 -19   2    9.90    6.20
   1 -19   2    8.60    3.90
  -1 -19  -2   19.90    7.10
   1  19   2    4.10    5.30
  -1  19  -2   10.80    5.30
   2 -19   2  167.08   16.50
  -2 -19  -2  152.78   15.30
  -2 -19  -2  137.49   23.00
   2 -19   2  144.89   11.80
  -2  19  -2  139.09   17.00
   2  19   2  162.08   22.30
   3 -19   2  110.49    9.20
   3 -19   2  107.59   14.20
  -3 -19  -2   90.99   19.60
  -3  19  -2  102.79   14.40
   3  19   2   91.69   17.40
   4 -19   2    4.20    2.40
  -4 -19  -2    3.30    4.50
   4 -19   2    3.00    1.70
   4 -19   2    1.00    2.00
   4  19   2    8.70    6.10
  -5 -19  -2   42.50   14.40
   5 -19   2   87.29   13.90
   5  19   2   67.49   14.60
  -6 -19  -2   51.69   16.60
   6  19   2   64.99   16.40
   5 -20  -2  192.78   24.40
  -5 -20   2  170.68   43.70
   5  20  -2  129.69   20.70
  -4 -20   2    8.90    7.30
  -4  20   2    2.90    4.10
   4  20  -2   14.40    6.80
  -3 -20   2   57.69   16.90
   3 -20  -2   68.59    9.40
   3 -20  -2   53.19    6.80
   3  20  -2   67.19   13.40
  -3  20   2   40.40   10.70
   2 -20  -2    4.20    3.70
  -2 -20   2    5.90    5.10
   2 -20  -2    3.40    3.00
  -2  20   2    5.70    4.50
   2  20  -2    2.30    3.00
   1 -20  -2   59.69   12.70
   1 -20  -2   56.99    9.70
  -1 -20   2   77.99   18.70
  -1 -20   2   73.89   13.80
  -1  20   2   79.79   14.70
   1  20  -2   55.59   11.50
   0 -20  -2   12.70    7.10
   0 -20   2   16.30    8.40
   0 -20   2    8.10    4.80
   0 -20  -2   11.90    5.30
   0  20   2    8.20    6.20
   0  20  -2   11.20    5.20
   1 -20   2  310.47   25.50
  -1 -20  -2  358.46   29.40
   1 -20   2  300.97   19.30
  -1  20  -2  339.47   26.60
   1  20   2  332.87   25.60
   2 -20   2    0.20    1.70
  -2 -20  -2    5.80    5.40
   2 -20   2    3.30    3.40
   2  20   2    0.00    2.40
   3 -20   2   59.49   10.20
   3 -20   2   59.89   10.10
  -3 -20  -2   44.20   14.10
   3  20   2   57.89   13.20
   4 -20   2    2.50    2.70
   4  20   2    3.70    4.20
  -5 -20  -2   83.59   22.30
   5 -20   2   63.09   12.80
   5  20   2   80.29   18.50
   2 -21  -2    4.40    4.80
  -2 -21   2    1.30    3.70
   2 -21  -2   -0.80    1.70
   2  21  -2    0.90    3.50
  -2  21   2    1.60    3.40
   1 -21  -2  114.49   14.00
   1 -21  -2  118.59   17.80
  -1 -21   2  109.89   21.20
  -1  21   2  127.09   19.50
   1  21  -2   86.19   14.90
   0 -21  -2   45.40    9.70
   0 -21   2   43.40    9.70
   0 -21   2   52.59   13.80
   0 -21  -2   55.19   13.30
   0  21  -2   29.80    8.80
   0  21   2   44.00   11.40
  -1 -21  -2    5.30    5.30
   1 -21   2   12.40    6.70
   1 -21   2    8.60    4.40
  -1  21  -2    5.50    3.70
   1  21   2    9.70    5.90
  -2 -21  -2   29.90   11.10
   2 -21   2   29.90    8.70
   2  21   2   15.30    6.40
  -2  21  -2   25.90    8.30
  15   0  -3   11.80    7.30
  14   0  -3    1.70    4.60
  13   0  -3  498.15   34.70
  13   0  -3  486.15   42.00
  12   0  -3    0.20    3.70
  12   0  -3   -2.40    1.90
 -12   0   3    0.30    2.10
  11   0  -3  693.53   46.00
  11   0  -3  758.72   39.80
  11   0  -3  755.12   36.50
 -11   0   3  720.13   43.00
  10   0  -3   -1.40    1.80
  10   0  -3    1.10    3.00
 -10   0   3    0.80    2.50
  10   0  -3    0.20    2.90
  -9   0   3    4.10    3.70
   9   0  -3    8.70    5.50
   9   0  -3    5.60    3.60
   9   0  -3    1.30    3.30
   8   0  -3   -1.70    1.10
   8   0  -3    0.20    2.00
   8   0  -3    0.30    2.20
  -8   0   3    0.40    1.80
   7   0  -3 1508.35   48.00
  -7   0   3 1470.25   46.30
  -7   0   3 1461.65   48.90
   7   0  -3 1591.64   51.99
   7   0  -3 1421.96   57.79
  -6   0   3    2.80    2.50
   6   0  -3    0.60    2.80
   6   0  -3    2.10    2.30
  -6   0   3    0.60    1.60
   6   0  -3    0.10    1.50
  -5   0   3  826.32   30.00
   5   0  -3  920.41   30.10
   5   0  -3  872.61   31.50
   5   0  -3  866.81   36.70
  -5   0   3  857.91   28.70
   4   0  -3    2.00    2.00
  -4   0   3   -0.70    2.70
  -4   0   3    1.30    1.40
   4   0  -3    0.10    1.10
  -4   0   3    1.90    1.60
  -3   0   3 1248.98   35.50
  -3   0   3 1242.48   41.40
   2   0  -3   -0.10    0.90
   2   0  -3    1.90    1.30
  -2   0   3    3.40    1.70
  -2   0   3    7.50    2.00
   1   0  -3 3475.85   85.29
   1   0  -3 3628.44   86.09
  -1   0   3 3626.64   85.99
   0   0   3    0.10    0.50
   0   0  -3    0.70    0.90
   0   0   3    0.80    1.50
   0   0  -3   -0.20    0.40
  -1   0  -3 6636.74  152.78
   1   0   3 6688.33  152.48
  -2   0  -3   -0.30    1.20
  -2   0  -3   -0.20    0.90
   2   0   3    2.70    1.80
  -3   0  -3  496.05   21.30
   3   0   3  486.55   22.00
   3   0   3  492.45   17.40
   4   0   3   -0.50    1.00
  -4   0  -3    2.00    1.80
  -4   0  -3    3.50    2.20
   4   0   3   -1.00    0.80
   5   0   3 1748.53   50.29
  -5   0  -3 1723.03   56.09
   5   0   3 1793.02   59.79
  -5   0  -3 1658.73   49.40
  -5   0  -3 1709.23   49.80
  -6   0  -3    2.80    2.10
   6   0   3    0.80    1.50
   6   0   3    0.20    1.50
  -6   0  -3   -0.40    1.50
  -6   0  -3    0.10    1.20
  -7   0  -3  607.64   26.50
   7   0   3  640.74   35.80
   7   0   3  666.63   28.30
  -7   0  -3  611.94   26.10
   8   0   3    1.20    3.40
  -8   0  -3    2.00    2.20
   8   0   3   -0.10    2.20
   9   0   3  323.37   27.90
   9   0   3  309.17   21.00
  10   0   3   -1.60    3.20
  10   0   3    1.20    3.20
 -10   0  -3    2.80    3.40
  11   0   3  523.15   31.10
  11   0   3  526.25   40.70
  12   0   3    1.70    3.60
 -12   0  -3   -0.70    1.70
  12   0   3    0.60    3.50
  14   0   3    0.10    2.90
  15   0   3   27.00   10.50
  15  -1  -3  134.09   24.50
  15   1  -3  116.99   24.30
  14  -1  -3   38.60   12.80
  14   1  -3   29.90   12.50
  13  -1  -3   63.39   15.60
  13  -1  -3   52.69   17.30
  13   1  -3   74.59   16.20
  13   1  -3   53.99   17.60
  12  -1  -3  156.38   27.40
  12  -1  -3  157.38   27.80
  12   1  -3  148.69   21.10
  11  -1  -3  197.68   30.10
  11  -1  -3  209.08   25.60
  11  -1  -3  174.38   16.30
  11   1  -3  227.28   34.00
  11   1  -3  177.38   24.10
  11   1  -3  168.18   16.60
 -11   1   3  204.08   26.60
  10  -1  -3   40.40    9.30
  10  -1  -3   40.60   12.70
  10  -1  -3   35.60   10.20
  10   1  -3   52.99   16.00
  10   1  -3   27.40    7.90
  10   1  -3   45.50   11.10
 -10   1   3   28.10    8.90
   9  -1  -3 1036.10   43.90
  -9  -1   3 1050.69   51.49
   9  -1  -3 1080.29   40.60
   9  -1  -3  995.20   50.29
   9   1  -3 1032.50   44.20
   9   1  -3  966.50   51.49
   9   1  -3 1032.80   41.30
  -9   1   3 1084.39   48.30
  -8  -1   3  100.19   17.60
   8  -1  -3   87.99   12.60
   8  -1  -3   96.69   17.60
   8  -1  -3  109.69   15.20
   8   1  -3  113.39   16.40
   8   1  -3  113.59   15.90
   8   1  -3   80.99   15.60
  -8   1   3   93.29   14.80
   7  -1  -3  128.49   10.60
  -7  -1   3  131.19   10.70
  -7  -1   3  124.19   11.20
   7  -1  -3  146.79   12.70
   7  -1  -3  118.09   16.60
  -7  -1   3  162.28   21.30
  -7   1   3  139.29   15.50
  -7   1   3  125.19    9.70
   7   1  -3  158.88   22.50
   7   1  -3  135.99   16.80
   7   1  -3  128.09   11.20
  -7   1   3  154.48   20.10
   6  -1  -3  453.05   19.60
  -6  -1   3  433.16   20.80
  -6  -1   3  440.96   19.70
   6  -1  -3  434.46   21.40
  -6  -1   3  406.56   25.90
   6  -1  -3  410.96   24.80
   6   1  -3  404.66   26.00
   6   1  -3  428.76   21.70
  -6   1   3  410.06   23.90
  -6   1   3  427.76   20.60
   6   1  -3  450.05   20.70
  -6   1   3  413.06   18.00
  -5  -1   3 1112.59   44.20
   5  -1  -3 1120.49   42.10
  -5  -1   3 1106.59   36.50
   5  -1  -3 1119.59   34.60
  -5  -1   3 1080.79   35.00
   5  -1  -3 1130.29   37.50
   5   1  -3 1104.29   36.10
   5   1  -3 1100.49   44.10
   5   1  -3 1145.99   37.90
  -5   1   3 1139.69   41.50
  -5   1   3 1085.99   36.10
  -5   1   3 1117.29   33.80
  -4  -1   3  128.59   12.10
  -4  -1   3  132.29    9.00
  -4  -1   3  132.59    8.70
   4  -1  -3  127.89    8.10
  -4   1   3  129.29    7.80
  -4   1   3  115.79   10.40
   4   1  -3  133.39    8.90
   4   1  -3  121.69    9.10
   3  -1  -3 5130.39  126.69
  -3  -1   3 4936.71  125.59
   3   1  -3 5183.98  126.99
  -3   1   3 5072.39  126.09
  -2  -1   3 1914.41   51.79
   2  -1  -3 1974.00   53.29
   2   1  -3 1888.11   52.29
  -1  -1   3   15.50    2.30
   1  -1  -3   26.50    3.30
   1  -1  -3   16.00    3.40
   1   1  -3   19.80    3.50
  -1   1   3   16.90    3.00
   1   1  -3   23.70    3.10
   0  -1  -3 1149.98   31.50
   0   1  -3 1108.69   27.80
   0   1  -3 1114.49   27.60
   0   1   3 1155.78   31.30
   1  -1   3 1303.67   32.00
  -1  -1  -3 1326.67   36.70
   1   1   3 1296.67   36.30
  -1   1  -3 1313.47   32.20
  -2  -1  -3  102.49    8.40
   2  -1   3   93.29    5.00
   2  -1   3  103.69    7.70
  -2  -1  -3   94.69    6.10
  -2   1  -3  104.49    5.20
   2   1   3   98.99    6.20
   2   1   3   91.39    8.30
   3  -1   3 2935.71   75.19
  -3  -1  -3 2905.31   77.99
   3   1   3 3005.10   78.49
  -3   1  -3 2883.61   74.89
  -4  -1  -3    4.10    2.40
   4  -1   3    2.70    1.60
  -4  -1  -3    4.00    2.70
   4  -1   3    5.20    2.90
   4   1   3    8.00    4.20
   4   1   3    5.90    2.90
  -4   1  -3    2.30    1.50
   5  -1   3  295.97   19.20
  -5  -1  -3  280.27   15.00
  -5  -1  -3  302.27   15.50
   5  -1   3  270.77   14.30
  -5  -1  -3  310.97   19.70
   5   1   3  279.87   20.20
   5   1   3  282.47   15.30
  -5   1  -3  288.57   14.10
  -5   1  -3  285.87   14.20
   6  -1   3  154.08   15.10
  -6  -1  -3  159.38   11.70
   6  -1   3  189.38   12.60
  -6  -1  -3  165.28   15.20
  -6  -1  -3  182.18   12.60
  -6   1  -3  168.98   11.60
   6   1   3  164.88   16.50
   6   1   3  193.68   13.20
  -6   1  -3  170.68   14.00
   7  -1   3  317.97   18.40
  -7  -1  -3  319.47   22.90
  -7  -1  -3  343.47   19.10
  -7  -1  -3  357.76   19.00
   7  -1   3  327.27   24.10
   7   1   3  332.07   25.70
  -7   1  -3  340.07   21.60
  -7   1  -3  327.17   17.10
   7   1   3  331.27   19.30
   8  -1   3   42.80   11.50
   8  -1   3   36.20    9.20
  -8  -1  -3   43.40   11.20
   8   1   3   36.20    8.20
   8   1   3   50.29   13.20
  -8   1  -3   50.39   11.40
  -8   1  -3   27.30    6.60
  -9  -1  -3  771.42   41.20
   9  -1   3  790.72   44.80
   9  -1   3  825.32   36.00
   9   1   3  754.32   35.50
  -9   1  -3  796.82   39.10
   9   1   3  792.12   46.70
  10  -1   3   92.89   14.40
  10  -1   3  105.49   20.40
 -10  -1  -3  124.59   20.00
  10   1   3  135.59   18.80
 -10   1  -3   99.19   16.90
  11  -1   3  309.27   23.00
  11  -1   3  286.97   37.50
  11   1   3  294.87   23.10
  11   1   3  193.68   29.10
  12  -1   3   88.39   15.60
  12  -1   3   94.49   21.50
  12   1   3  121.19   25.80
  12   1   3   56.29   16.70
  13  -1   3  126.59   19.50
  13   1   3  140.69   21.70
  14  -1   3   39.40   11.90
  14   1   3   36.70   11.30
  15  -1   3  172.18   25.50
  15   1   3  166.88   25.70
  15  -2  -3   -1.70    2.50
  14  -2  -3  184.08   26.40
  14   2  -3  186.68   26.80
  13  -2  -3   46.40   13.10
  13  -2  -3   53.39   17.10
  13   2  -3   54.49   13.40
  12  -2  -3   68.09   21.50
  12  -2  -3   61.39   17.00
  12   2  -3   38.30   15.20
  12   2  -3   57.59   13.40
  11  -2  -3   83.59   16.10
  11  -2  -3   92.39   20.00
 -11  -2   3   78.89   17.60
  11  -2  -3   72.39   11.60
  11   2  -3   67.09   14.50
 -11   2   3   95.19   16.80
  11   2  -3   57.19   16.40
  11   2  -3   76.89   14.80
  10  -2  -3  590.94   28.70
  10  -2  -3  551.74   31.60
  10  -2  -3  499.25   35.20
 -10  -2   3  555.04   38.30
 -10   2   3  544.05   32.20
  10   2  -3  566.34   32.40
  10   2  -3  490.55   37.70
  10   2  -3  585.74   30.70
   9  -2  -3    1.60    2.90
   9  -2  -3    6.90    4.90
  -9  -2   3    7.30    6.50
   9  -2  -3    1.20    3.10
   9   2  -3    1.60    3.10
   9   2  -3    5.20    4.50
  -9   2   3    1.50    2.90
   9   2  -3   -2.40    1.40
  -8  -2   3  430.76   30.50
  -8  -2   3  365.56   21.00
   8  -2  -3  422.06   21.10
   8  -2  -3  424.86   24.10
   8  -2  -3  390.06   27.00
   8   2  -3  441.26   25.10
  -8   2   3  447.06   26.10
   8   2  -3  393.26   22.40
   8   2  -3  398.96   32.50
   7  -2  -3  109.69   16.60
  -7  -2   3  114.59   13.50
   7  -2  -3  110.19    9.40
  -7  -2   3  103.79   16.80
   7  -2  -3  152.08   17.10
  -7  -2   3  130.79   15.70
  -7   2   3  134.19   13.00
  -7   2   3  123.79    9.10
   7   2  -3  140.39   21.80
   7   2  -3  114.59   10.80
  -7   2   3  115.79   10.70
   6  -2  -3   15.70    4.50
  -6  -2   3   29.60    9.00
   6  -2  -3   29.10    5.90
  -6  -2   3   23.70    5.20
  -6  -2   3   21.50    8.20
   6  -2  -3   12.70    5.00
   6   2  -3   21.10    7.60
  -6   2   3   25.30    6.80
  -6   2   3   25.00    6.00
   6   2  -3   21.90    5.60
  -6   2   3   26.50    6.30
   6   2  -3   16.80    4.50
  -5  -2   3  231.78   18.50
   5  -2  -3  241.38   12.00
   5  -2  -3  203.28   15.00
   5  -2  -3  266.27   14.90
  -5  -2   3  218.88   13.40
  -5   2   3  213.28   10.90
   5   2  -3  255.17   14.80
   5   2  -3  228.58   18.10
   5   2  -3  219.48   13.30
  -5   2   3  218.38   14.60
  -5   2   3  227.58   13.30
  -4  -2   3 1712.23   56.59
  -4  -2   3 1604.64   46.40
  -4   2   3 1564.34   48.40
   4   2  -3 1578.04   47.10
  -4   2   3 1609.24   46.30
   3  -2  -3   65.49    4.90
  -3  -2   3   62.39    5.70
   3  -2  -3   67.29    6.00
  -3  -2   3   66.49    5.70
  -3  -2   3   71.29   11.20
   3   2  -3   66.29    6.00
  -3   2   3   63.79    6.40
  -3   2   3   57.89    4.60
   3   2  -3   66.19    6.00
  -3   2   3   69.19    6.00
  -2  -2   3 2421.66   64.09
   2  -2  -3 2499.15   66.49
   2  -2  -3 2427.76   65.09
   2   2  -3 2475.55   64.89
   1  -2  -3    4.40    1.50
   1  -2  -3    5.20    1.90
  -1  -2   3    2.30    1.20
  -1  -2   3    8.00    1.70
  -1   2   3    2.80    1.60
   1   2  -3    3.90    1.30
   1   2  -3    4.80    1.80
  -1   2   3    4.40    1.50
   0  -2   3    0.30    0.50
   0  -2   3   -0.50    0.90
   0  -2  -3   -0.20    0.90
   0  -2  -3    0.90    0.90
   0   2   3    0.80    1.00
   0   2   3    3.10    2.00
   0   2  -3    0.00    0.50
  -1  -2  -3  852.71   27.90
   1  -2   3  804.02   24.60
  -1  -2  -3  809.42   24.00
   1   2   3  812.02   27.80
   1   2   3  795.42   23.70
   2   2   3 2913.51   85.79
   3  -2   3   41.30    7.00
  -3  -2  -3   34.40    5.70
   3  -2   3   27.90    4.00
  -3   2  -3   34.90    4.30
   3   2   3   16.10    4.40
   3   2   3   30.10    5.30
  -3   2  -3   27.30    5.10
   4  -2   3 1062.69   37.10
  -4  -2  -3 1033.80   34.00
  -4   2  -3 1087.29   31.30
  -4   2  -3 1064.09   34.60
   4   2   3 1056.49   41.90
   4   2   3 1019.20   33.90
   5  -2   3  254.47   13.30
   5  -2   3  254.47   17.00
  -5  -2  -3  250.07   14.40
  -5  -2  -3  244.68   14.30
  -5   2  -3  245.08   12.30
   5   2   3  234.38   18.90
   5   2   3  255.97   14.80
  -5   2  -3  225.98   14.30
  -5   2  -3  249.18   12.80
   6  -2   3    2.70    2.40
  -6  -2  -3    0.30    1.20
   6  -2   3   -0.10    1.50
  -6  -2  -3    3.40    4.20
  -6  -2  -3    0.40    1.00
   6   2   3    2.90    2.80
   6   2   3    2.70    2.90
  -6   2  -3   -0.40    1.50
  -6   2  -3    1.70    1.80
  -6   2  -3    1.80    1.40
  -7  -2  -3  159.18   22.00
  -7  -2  -3  146.29   12.40
   7  -2   3  131.49   17.70
   7  -2   3  125.19   11.00
  -7  -2  -3  146.09   12.10
  -7   2  -3  128.59   12.20
  -7   2  -3  138.19   11.10
   7   2   3  164.18   17.80
   7   2   3  167.48   26.40
   8  -2   3  327.17   22.60
  -8  -2  -3  300.47   24.20
   8  -2   3  352.16   26.10
   8   2   3  292.67   26.10
  -8   2  -3  298.67   20.40
   8   2   3  307.47   20.30
  -8   2  -3  304.47   18.10
   9  -2   3   61.49   14.60
   9  -2   3   55.79   10.20
  -9  -2  -3   67.89   15.00
  -9   2  -3   48.10   10.80
   9   2   3   60.29   15.80
   9   2   3   64.29   12.80
  10  -2   3  562.04   39.00
  10  -2   3  637.94   32.30
 -10  -2  -3  637.94   39.30
  10   2   3  630.54   33.70
  10   2   3  580.84   42.30
  11  -2   3  120.59   21.50
  11  -2   3   89.59   14.60
  11   2   3   90.69   20.80
 -11   2  -3   99.89   17.20
  11   2   3  154.58   21.90
  12  -2   3    4.90    4.70
  12  -2   3    1.30    3.20
 -12  -2  -3    0.40    2.00
  12   2   3    6.30    6.10
  12   2   3    6.40    6.90
 -12   2  -3    0.80    1.90
  13  -2   3   98.09   17.50
  13   2   3   99.09   18.30
  14  -2   3   94.09   17.10
  14   2   3  141.69   22.40
  15  -2   3   12.40    7.50
  15  -3  -3    0.30    3.50
  15   3  -3    8.80    6.80
  14  -3  -3  145.49   24.50
  14   3  -3  126.89   21.10
 -13  -3   3    0.00    2.50
  13  -3  -3    2.20    4.90
  13   3  -3   13.90    7.60
  12  -3  -3  427.26   35.50
  12  -3  -3  460.85   35.40
  12   3  -3  529.85   34.40
  12   3  -3  488.85   42.10
  11  -3  -3    4.40    4.70
  11  -3  -3   10.80    6.80
 -11  -3   3    9.80    9.40
  11  -3  -3    3.40    3.90
  11   3  -3   13.50    8.70
 -11   3   3    7.30    4.80
  11   3  -3   10.50    5.50
  11   3  -3    9.50    5.50
  10  -3  -3  105.59   19.70
 -10  -3   3   69.99   20.40
  10  -3  -3  109.29   14.10
  10  -3  -3  105.49   16.40
 -10   3   3  112.19   16.10
  10   3  -3  100.79   21.70
  10   3  -3   71.99   12.10
  10   3  -3   82.19   15.40
   9  -3  -3   11.00    7.00
   9  -3  -3   15.80    5.40
  -9  -3   3    9.40    6.20
   9  -3  -3   23.00    8.10
   9   3  -3   10.70    5.60
   9   3  -3   15.70    7.60
   9   3  -3   13.00    5.90
  -9   3   3   12.50    5.60
  -8  -3   3  348.57   28.20
   8  -3  -3  308.67   23.20
  -8  -3   3  289.57   18.80
   8  -3  -3  353.86   21.70
   8  -3  -3  346.87   18.30
  -8   3   3  344.37   21.20
   8   3  -3  341.17   22.10
   8   3  -3  298.27   26.40
   8   3  -3  362.26   21.40
  -7  -3   3    9.60    4.50
   7  -3  -3   -1.40    3.10
   7  -3  -3    3.80    3.50
  -7  -3   3    6.20    3.90
   7  -3  -3    1.20    2.10
  -7  -3   3   -0.80    2.50
  -7   3   3    1.40    1.70
  -7   3   3    1.90    1.70
   7   3  -3    2.60    2.90
   7   3  -3    0.00    2.80
   7   3  -3    1.20    2.90
  -7   3   3    2.80    2.90
   6  -3  -3 1156.48   40.70
  -6  -3   3 1075.59   38.90
  -6  -3   3 1167.08   50.79
  -6  -3   3 1178.68   43.50
   6  -3  -3 1124.59   43.20
   6   3  -3 1186.58   41.80
   6   3  -3 1175.88   40.40
  -6   3   3 1159.48   34.50
  -6   3   3 1204.48   45.20
   5  -3  -3   46.90    5.90
   5  -3  -3   75.39   10.30
  -5  -3   3   48.70    7.10
  -5  -3   3   59.99   13.10
  -5  -3   3   49.30    8.10
   5  -3  -3   47.40    8.80
   5   3  -3   44.00    9.60
  -5   3   3   38.40    6.90
  -5   3   3   46.60    4.50
  -5   3   3   48.00    7.00
   5   3  -3   29.30    6.00
   5   3  -3   46.40    7.00
   4  -3  -3  430.66   15.30
  -4  -3   3  413.76   18.00
  -4  -3   3  385.26   17.80
  -4  -3   3  421.06   24.80
   4  -3  -3  421.36   18.60
  -4   3   3  422.86   17.80
  -4   3   3  403.46   14.60
   4   3  -3  394.46   18.30
  -4   3   3  407.76   18.00
   4   3  -3  392.46   18.00
  -3  -3   3   24.10    4.80
  -3  -3   3   20.80    4.10
   3  -3  -3   13.20    3.20
   3  -3  -3   18.10    3.00
   3  -3  -3   18.10    4.00
  -3  -3   3   15.00    4.70
   3   3  -3   17.10    3.50
  -3   3   3   27.00    4.50
  -3   3   3   17.00    2.80
  -2  -3   3  139.09    8.40
   2  -3  -3  122.99    7.70
   2  -3  -3  154.68    7.40
  -2  -3   3  147.39    8.80
  -2   3   3  141.59    7.00
   2   3  -3  127.29    7.60
   2   3  -3  153.58    8.60
  -2   3   3  141.39    8.20
   1  -3  -3    0.70    1.00
  -1  -3   3    3.80    1.50
   1  -3  -3    5.00    2.00
  -1  -3   3    0.40    0.90
   1   3  -3    2.00    1.20
  -1   3   3    1.50    1.30
   1   3  -3   -0.10    0.90
  -1   3   3    2.20    1.30
   0  -3   3  699.03   17.50
   0  -3  -3  669.33   23.00
   0  -3   3  643.84   20.60
   0   3   3  726.23   23.80
   0   3  -3  685.53   17.40
   0   3   3  665.63   21.30
  -1  -3  -3 1273.07   36.10
  -1  -3  -3 1332.17   40.00
   1   3   3 1264.07   42.90
   2  -3   3  686.83   22.80
  -2  -3  -3  685.93   27.70
  -2  -3  -3  702.53   23.70
   2   3   3  721.33   29.00
  -2   3  -3  699.03   21.40
   2   3   3  730.53   23.90
  -3  -3  -3 1029.60   38.40
   3  -3   3 1036.80   32.50
  -3  -3  -3  956.00   32.10
   3  -3   3  993.60   28.00
  -3   3  -3 1046.70   30.30
   3   3   3 1016.30   32.50
   3   3   3 1030.60   39.50
  -3   3  -3 1004.50   27.70
  -4  -3  -3 1525.85   53.89
   4  -3   3 1570.04   48.00
  -4  -3  -3 1589.44   47.00
   4   3   3 1515.35   46.70
  -4   3  -3 1539.75   44.30
  -4   3  -3 1609.54   42.50
   5  -3   3  254.37   13.10
  -5  -3  -3  242.98   14.70
  -5  -3  -3  240.68   18.80
  -5  -3  -3  247.18   14.80
   5  -3   3  227.48   15.60
   5   3   3  234.98   14.70
  -5   3  -3  242.58   13.60
   5   3   3  218.28   18.90
  -5   3  -3  224.88   12.00
  -5   3  -3  242.48   11.60
  -6  -3  -3 1803.62   55.19
   6  -3   3 1778.82   52.29
  -6  -3  -3 1756.52   64.29
   6  -3   3 1753.82   59.59
  -6  -3  -3 1726.63   55.09
   6   3   3 1772.22   67.59
  -6   3  -3 1733.43   48.90
  -6   3  -3 1742.63   50.89
   6   3   3 1725.93   55.49
  -6   3  -3 1791.02   53.89
   7  -3   3   17.70    5.70
  -7  -3  -3   16.10    7.30
  -7  -3  -3   19.50    6.20
  -7  -3  -3    7.90    3.60
   7  -3   3   11.70    5.50
   7   3   3   13.20    5.70
  -7   3  -3   14.10    4.90
  -7   3  -3   10.40    3.70
   7   3   3   17.80    7.20
  -8  -3  -3  261.37   23.10
   8  -3   3  231.68   16.40
   8  -3   3  248.48   21.30
  -8  -3  -3  258.17   26.00
  -8   3  -3  236.58   20.80
   8   3   3  218.78   27.70
   8   3   3  227.38   17.50
  -8   3  -3  235.38   15.50
  -9  -3  -3   10.80    6.50
   9  -3   3    6.00    3.90
   9  -3   3    3.10    3.80
   9   3   3    5.50    3.90
   9   3   3   -0.90    2.60
  -9   3  -3    6.30    3.80
  10  -3   3  147.89   22.50
  10  -3   3  187.48   16.50
 -10  -3  -3  188.38   27.30
  10   3   3  189.08   23.10
  10   3   3  203.48   30.50
 -10   3  -3  178.18   16.00
  11  -3   3    0.50    2.80
 -11  -3  -3    1.20    2.70
  11  -3   3    4.50    4.00
  11   3   3   11.70    8.30
 -11   3  -3    8.10    4.70
  11   3   3   -2.80    1.90
  12  -3   3  554.14   42.10
  12  -3   3  555.74   33.20
  12   3   3  538.75   46.20
  12   3   3  608.94   36.40
  13  -3   3   34.90   10.60
  13   3   3   29.60    9.80
  14  -3   3   49.80   13.20
  14   3   3   43.40   13.20
  15  -4  -3    8.10    6.70
  15   4  -3   17.00    9.50
  14  -4  -3  118.59   21.90
  14   4  -3  113.49   21.40
  13  -4  -3  130.29   20.50
  13   4  -3  170.18   25.30
  12  -4  -3   49.50   15.30
  12  -4  -3   38.60   11.10
  12   4  -3   27.70   13.80
 -12   4   3   20.40    7.10
  12   4  -3   37.10   12.20
 -11  -4   3   16.90    9.30
  11  -4  -3   28.10    7.70
  11  -4  -3   42.00   13.10
  11  -4  -3   11.30    6.10
  11   4  -3   21.40   11.60
 -11   4   3   29.10    8.60
  11   4  -3   37.50   12.50
  10  -4  -3  957.80   43.50
 -10  -4   3  974.20   54.89
  10  -4  -3  952.20   48.20
  10  -4  -3  956.40   38.00
  10   4  -3  883.51   54.09
 -10   4   3  969.50   39.80
  10   4  -3  894.71   42.10
  10   4  -3 1029.50   46.10
   9  -4  -3   12.80    6.90
   9  -4  -3   11.20    4.50
  -9  -4   3   10.40    8.10
   9  -4  -3   11.20    6.00
   9   4  -3    4.00    4.60
   9   4  -3   22.10   10.50
  -9   4   3    7.40    4.40
   9   4  -3   13.90    6.40
   8  -4  -3  491.85   29.20
   8  -4  -3  500.55   27.10
  -8  -4   3  570.14   37.50
   8  -4  -3  557.84   23.60
  -8  -4   3  509.75   26.30
   8   4  -3  573.34   28.40
  -8   4   3  492.35   24.20
   8   4  -3  498.95   35.30
   8   4  -3  530.25   28.70
   7  -4  -3  574.64   30.60
  -7  -4   3  607.64   37.00
  -7  -4   3  611.44   27.50
   7  -4  -3  597.24   23.30
   7  -4  -3  573.44   29.50
  -7   4   3  572.04   26.70
   7   4  -3  592.74   28.90
   7   4  -3  597.64   28.00
   7   4  -3  549.25   35.40
  -7   4   3  598.84   23.50
  -7   4   3  573.74   24.80
  -6  -4   3   51.59    9.30
   6  -4  -3   43.60    6.20
   6  -4  -3   41.80    8.40
   6  -4  -3   44.10    8.90
  -6  -4   3   41.00    7.60
  -6  -4   3   34.10    9.00
   6   4  -3   29.20    8.60
   6   4  -3   52.89    9.30
  -6   4   3   44.10    8.00
   6   4  -3   43.70    8.70
  -6   4   3   39.40    6.60
  -6   4   3   47.40    5.80
   5  -4  -3  208.58   13.70
   5  -4  -3  230.48   11.10
  -5  -4   3  255.37   14.90
  -5  -4   3  211.98   19.30
  -5  -4   3  222.98   14.10
   5   4  -3  258.67   15.10
   5   4  -3  368.36   30.70
  -5   4   3  261.87   12.70
  -5   4   3  223.88    9.90
   5   4  -3  222.88   14.60
  -4  -4   3  733.03   35.90
   4  -4  -3  744.73   27.60
   4  -4  -3  781.62   27.30
  -4  -4   3  747.83   27.50
  -4  -4   3  806.32   28.50
  -4   4   3  772.32   21.90
   4   4  -3  784.72   28.20
   4   4  -3  762.42   28.30
  -4   4   3  756.02   23.80
  -3  -4   3    1.10    1.60
  -3  -4   3    5.50    4.10
   3  -4  -3    0.00    0.80
   3  -4  -3    4.20    2.20
   3  -4  -3    0.40    1.20
  -3  -4   3    2.20    1.60
  -3   4   3    0.70    0.90
   3   4  -3    0.50    1.60
  -3   4   3    0.10    0.90
   3   4  -3    0.00    1.10
  -2  -4   3 2116.09   59.89
   2  -4  -3 2171.48   61.69
   2   4  -3 2165.38   60.59
  -2   4   3 2215.08   61.79
   1  -4  -3  943.81   29.30
  -1  -4   3  985.00   27.20
  -1  -4   3  969.50   28.80
   1  -4  -3  947.71   28.50
   1   4  -3  992.70   27.40
  -1   4   3 1009.50   28.70
   0  -4  -3 1245.18   35.90
   0   4   3 1260.77   37.70
  -1  -4  -3 1238.68   36.50
  -1  -4  -3 1291.37   40.40
   1   4   3 1219.18   40.30
   2  -4   3 1000.50   30.00
  -2  -4  -3 1036.80   32.60
  -2  -4  -3 1078.79   38.00
  -2   4  -3 1055.19   28.00
   2   4   3 1027.70   32.50
   2   4   3  988.30   37.70
   3  -4   3    5.70    2.00
  -3  -4  -3    7.00    3.10
  -3  -4  -3    9.50    4.60
   3  -4   3    3.50    2.00
   3  -4   3    5.20    1.90
   3   4   3    1.60    1.80
  -3   4  -3    5.90    2.00
   3   4   3    2.60    3.00
  -4  -4  -3 2316.37   73.79
  -4  -4  -3 2369.96   65.49
   4   4   3 2242.08   74.99
   5  -4   3 1088.69   33.80
  -5  -4  -3 1042.40   37.10
  -5  -4  -3 1075.39   37.90
  -5  -4  -3 1021.00   44.70
   5  -4   3 1062.89   38.20
   5   4   3 1023.90   37.50
  -5   4  -3 1077.09   33.40
  -5   4  -3 1048.70   30.70
  -5   4  -3 1080.79   33.00
  -6  -4  -3   69.19    9.50
   6  -4   3   98.19   13.80
   6  -4   3  108.99   11.90
  -6  -4  -3   89.89   12.50
  -6  -4  -3   97.69   16.80
  -6   4  -3   72.39    6.00
   6   4   3   89.89   17.90
  -6   4  -3   78.69    7.50
  -6   4  -3   98.69   10.70
   6   4   3  110.59   14.00
   7  -4   3  211.68   17.90
  -7  -4  -3  255.87   19.90
  -7  -4  -3  203.18   20.20
   7  -4   3  244.98   15.30
   7   4   3  209.98   16.30
  -7   4  -3  232.48   14.30
  -7   4  -3  237.88   14.30
   7   4   3  211.48   28.00
   8  -4   3 1457.45   49.00
  -8  -4  -3 1424.96   61.89
  -8  -4  -3 1300.77   49.30
   8  -4   3 1340.17   55.99
  -8   4  -3 1478.45   47.80
   8   4   3 1509.15   53.49
  -8   4  -3 1360.96   46.40
   8   4   3 1423.56   65.99
   9  -4   3    9.50    6.30
  -9  -4  -3    4.00    5.20
   9  -4   3    3.80    3.00
  -9   4  -3    3.50    2.70
   9   4   3    4.00    4.20
   9   4   3    4.80    4.50
 -10  -4  -3  233.88   30.60
  10  -4   3  263.47   24.60
  10  -4   3  277.87   20.00
  10   4   3  248.48   34.90
  10   4   3  242.48   20.70
 -10   4  -3  237.08   17.50
  11  -4   3  176.58   29.10
  11  -4   3  161.18   19.80
 -11  -4  -3  134.19   24.40
  11   4   3  146.29   20.80
 -11   4  -3  131.79   13.40
  11   4   3  125.49   26.60
  12  -4   3   12.30    8.40
  12  -4   3   11.60    6.70
  12   4   3   14.40    8.10
  13  -4   3   84.89   16.60
  13   4   3  123.49   21.80
  14  -4   3  129.99   20.20
  14   4   3  159.68   23.90
  15   5  -3  110.59   21.60
  14  -5  -3   16.60    8.30
  14   5  -3   12.90    8.00
  13  -5  -3   27.10    9.80
  13   5  -3   18.20    9.00
  12  -5  -3   75.19   14.50
  12   5  -3   91.89   21.50
  12   5  -3   68.79   16.60
  11  -5  -3  205.68   28.40
 -11  -5   3  216.48   34.60
  11  -5  -3  181.58   23.10
  11   5  -3  156.68   28.80
  11   5  -3  168.88   21.60
  10  -5  -3   81.29   16.60
  10  -5  -3   71.69   13.00
 -10  -5   3   63.19   18.20
  10  -5  -3   79.99   12.00
  10   5  -3   56.99   17.30
  10   5  -3   87.49   15.40
  10   5  -3   72.99   14.30
 -10   5   3   65.09   10.10
   9  -5  -3 1372.36   52.69
   9  -5  -3 1430.36   46.40
  -9  -5   3 1386.36   67.09
   9  -5  -3 1322.57   55.59
   9   5  -3 1436.56   55.59
  -9   5   3 1408.06   45.00
   9   5  -3 1442.76   56.29
   9   5  -3 1340.37   66.69
   8  -5  -3  123.59   10.00
   8  -5  -3  103.39   15.40
  -8  -5   3  143.29   17.50
   8  -5  -3  128.49   17.00
  -8  -5   3  137.59   23.60
  -8   5   3  109.19    9.00
   8   5  -3   92.19   14.60
   8   5  -3  139.79   24.70
   8   5  -3   96.99   13.90
  -7  -5   3   86.89   13.10
   7  -5  -3   62.69    8.10
  -7  -5   3   72.69   19.90
   7  -5  -3   66.59   11.50
   7  -5  -3   48.20    8.70
   7   5  -3   70.09   16.50
   7   5  -3   49.70    8.70
   7   5  -3   80.09   13.10
  -7   5   3   56.79    7.20
   6  -5  -3  170.58   12.50
  -6  -5   3  179.98   13.60
   6  -5  -3  165.58    9.70
  -6  -5   3  114.19   18.10
   6  -5  -3  172.88   13.30
  -6  -5   3  170.48   13.20
   6   5  -3  172.38   13.90
  -6   5   3  168.98    8.70
   6   5  -3  174.58   24.50
   6   5  -3  188.68   14.10
  -6   5   3  169.68    7.70
   5  -5  -3 1236.98   40.80
  -5  -5   3 1242.08   42.10
   5  -5  -3 1327.37   35.70
   5  -5  -3 1258.47   42.10
  -5  -5   3 1269.97   42.50
  -5  -5   3 1347.07   55.19
  -5   5   3 1238.88   31.10
   5   5  -3 1241.98   42.30
   5   5  -3 1274.97   43.10
  -5   5   3 1276.27   31.90
   4  -5  -3    6.10    2.80
   4  -5  -3    6.50    2.00
   4  -5  -3   10.60    3.90
  -4  -5   3    5.10    3.70
  -4  -5   3    4.00    2.40
   4   5  -3    6.90    3.10
   4   5  -3    5.20    2.70
  -3  -5   3 3830.72  103.69
   3  -5  -3 3912.21  104.19
  -3   5   3 3949.30  104.29
   3   5  -3 3925.91  105.09
   2  -5  -3    0.10    1.00
  -2  -5   3   -0.40    1.10
  -2  -5   3    1.70    2.60
   2  -5  -3   -0.10    1.00
  -2  -5   3    3.80    2.00
  -2   5   3    1.90    1.60
  -2   5   3    1.20    0.80
   2   5  -3   -0.30    0.90
   2   5  -3    0.50    1.20
  -1  -5   3   12.40    3.10
   1  -5  -3   16.70    3.70
  -1  -5   3   15.30    3.10
   1  -5  -3   12.20    3.40
  -1   5   3   14.50    3.30
   1   5  -3   10.50    2.70
  -1   5   3   14.90    3.90
   0  -5  -3  924.61   30.50
   0  -5  -3  868.81   28.70
   0  -5   3  841.72   26.30
   0  -5   3  905.11   24.90
   0   5   3  887.51   30.10
   0   5  -3  933.41   26.20
   0   5   3  914.51   28.90
  -1  -5  -3  548.95   23.60
   1  -5   3  512.35   15.50
   1  -5   3  526.85   17.60
  -1  -5  -3  532.85   20.60
  -1   5  -3  516.55   15.30
   1   5   3  533.85   20.40
  -1   5  -3  530.35   16.40
   1   5   3  522.95   23.40
   2  -5   3  172.68    9.30
  -2  -5  -3  160.78   10.80
  -2  -5  -3  184.58   13.90
   2  -5   3  188.48    7.60
   2   5   3  177.68   14.10
   2   5   3  180.08   11.20
  -2   5  -3  179.08    7.40
  -3  -5  -3 1083.09   42.60
   3  -5   3 1088.59   30.00
  -3  -5  -3 1098.89   36.60
   3  -5   3 1106.79   32.80
   3   5   3 1074.79   36.20
   4  -5   3  243.28   11.20
   4  -5   3  233.98   11.30
  -4  -5  -3  230.88   18.50
  -4  -5  -3  252.17   15.20
  -4  -5  -3  225.58   14.20
   4  -5   3  244.78   13.30
   4   5   3  210.58   14.10
   4   5   3  257.07   20.10
  -4   5  -3  226.78    9.00
  -4   5  -3  244.58    9.80
   5  -5   3 1373.46   43.70
   5  -5   3 1362.36   39.50
  -5  -5  -3 1382.06   54.19
  -5  -5  -3 1271.67   43.80
  -5  -5  -3 1287.67   44.60
  -5   5  -3 1277.07   36.00
   5   5   3 1236.58   43.90
  -5   5  -3 1326.37   38.90
  -5   5  -3 1276.77   36.30
   5   5   3 1254.07   53.99
   6  -5   3  459.45   20.50
   6  -5   3  485.65   24.50
  -6  -5  -3  465.25   24.10
  -6  -5  -3  460.95   23.50
   6   5   3  416.16   30.40
  -6   5  -3  478.15   18.40
  -6   5  -3  473.55   20.20
  -6   5  -3  481.75   16.70
  -7  -5  -3  117.99   20.60
  -7  -5  -3   61.19    9.50
   7  -5   3   96.79   14.80
   7  -5   3  119.19   13.50
  -7   5  -3   84.09    7.40
   7   5   3   93.19   13.70
   7   5   3   64.89   16.20
  -7   5  -3   87.99   10.70
  -8  -5  -3   -2.50    1.90
   8  -5   3   -0.70    1.70
  -8  -5  -3    0.10    1.90
   8  -5   3    3.70    3.90
   8   5   3    2.20    4.30
  -8   5  -3    1.60    2.20
  -8   5  -3    0.20    1.60
   8   5   3    9.20    5.00
   9  -5   3  848.02   43.30
   9  -5   3  826.62   35.80
  -9  -5  -3  915.01   49.90
   9   5   3  846.12   39.60
  -9   5  -3  811.02   31.50
   9   5   3  774.32   50.09
  10  -5   3   15.60    8.10
 -10  -5  -3   25.20   11.00
  10  -5   3   18.20    6.90
  10   5   3   17.00   14.30
  10   5   3   34.10   10.00
 -11  -5  -3  197.28   30.50
  11  -5   3  203.18   18.00
  11  -5   3  197.28   29.40
 -11   5  -3  186.08   14.40
  11   5   3  283.77   38.60
  11   5   3  144.89   28.60
  12  -5   3   60.99   16.40
  12  -5   3   69.09   13.70
  12   5   3   91.29   17.80
  12   5   3   70.99   23.30
  13  -5   3  123.59   26.30
  13  -5   3  118.39   19.00
  13   5   3   90.19   18.60
  14  -5   3   -0.50    2.70
  14   5   3   -1.40    2.30
  14  -6  -3   19.80   10.10
  14   6  -3   15.30    8.80
  13  -6  -3  288.47   26.00
  13   6  -3  355.66   30.10
 -12  -6   3    0.60    2.60
  12  -6  -3    0.30    3.40
  12   6  -3   -1.80    2.90
 -11  -6   3  344.47   34.20
  11  -6  -3  369.86   26.50
  11   6  -3  231.48   34.30
 -10  -6   3    7.30    6.30
  10  -6  -3    6.40    4.90
  10  -6  -3    8.40    3.80
  10   6  -3   12.40    5.80
  10   6  -3   -1.50    2.80
  10   6  -3   -1.10    2.20
   9  -6  -3    3.20    3.70
  -9  -6   3   -1.60    2.40
   9  -6  -3    4.50    2.70
   9   6  -3    2.90    3.30
   9   6  -3    2.50    4.30
   8  -6  -3   61.19    8.60
  -8  -6   3   33.50   10.40
   8  -6  -3   38.30    9.30
  -8  -6   3   37.50    8.00
   8   6  -3   22.50    8.70
   8   6  -3   39.50    9.10
   8   6  -3   51.69   11.70
  -7  -6   3  787.52   34.30
   7  -6  -3  833.02   27.70
  -7  -6   3  858.41   47.20
   7  -6  -3  778.72   34.00
   7   6  -3  754.32   44.30
   7   6  -3  814.62   36.20
   7   6  -3  848.42   35.70
  -6  -6   3    0.30    1.70
  -6  -6   3   -0.40    2.70
   6  -6  -3    3.50    2.80
  -6  -6   3    3.70    2.80
   6  -6  -3    1.30    2.40
   6  -6  -3    3.20    1.90
   6   6  -3    5.50    4.70
   6   6  -3    0.50    2.00
  -5  -6   3  273.17   16.70
   5  -6  -3  321.27   17.60
   5  -6  -3  289.87   11.70
  -5  -6   3  337.47   25.60
   5   6  -3  273.57   16.80
   5   6  -3  275.37   17.20
  -4  -6   3    5.70    2.90
   4  -6  -3   11.90    3.80
   4  -6  -3    9.50    2.30
   4  -6  -3    7.20    2.90
  -4  -6   3    9.60    4.90
  -4  -6   3   15.70    5.10
   4   6  -3    8.40    3.40
  -3  -6   3   59.59   12.70
  -3  -6   3   35.20    6.10
  -3  -6   3   45.50    6.90
   3  -6  -3   43.50    3.70
   3  -6  -3   55.39    8.20
   3   6  -3   45.80    7.10
  -3   6   3   52.99    7.70
   3   6  -3   60.29    8.50
  -2  -6   3  249.08   18.10
  -2  -6   3  221.88   11.90
  -2  -6   3  259.07   13.20
   2  -6  -3  204.98   12.30
   2  -6  -3  247.18   10.70
  -2   6   3  230.98   12.70
   2   6  -3  246.48   12.40
  -1  -6   3 4664.33  114.59
   1  -6  -3 4510.45  118.69
  -1   6   3 4496.75  117.79
   1   6  -3 4562.24  113.89
   0  -6  -3  193.08   12.20
   0  -6   3  184.18    9.60
   0  -6   3  187.98    9.00
   0  -6  -3  186.38   11.30
   0   6   3  220.68   12.00
   0   6  -3  193.28    8.90
   0   6  -3  182.38    9.00
   0   6   3  195.98   12.00
  -1  -6  -3 2694.33   72.19
  -2  -6  -3    2.70    3.00
   2  -6   3    1.30    1.10
   2  -6   3    2.60    1.60
  -2  -6  -3    4.40    2.90
   2   6   3    0.90    1.70
  -2   6  -3    1.70    0.90
   2   6   3    4.10    3.30
  -2   6  -3    2.20    1.40
  -3  -6  -3   18.00    5.70
  -3  -6  -3   22.00    5.80
   3  -6   3   19.60    4.00
   3  -6   3   24.10    3.90
   3  -6   3   18.50    3.50
   3   6   3   17.00    6.40
   3   6   3   14.80    4.20
  -3   6  -3   20.40    1.70
  -4  -6  -3   -0.30    1.80
   4  -6   3    0.80    1.50
  -4  -6  -3    1.30    2.10
   4  -6   3    0.50    1.10
   4  -6   3    0.80    1.00
   4   6   3   -1.60    1.40
  -4   6  -3    1.00    0.70
   4   6   3    0.10    1.80
  -4   6  -3    2.10    0.80
  -5  -6  -3 1604.64   62.89
   5  -6   3 1691.43   47.80
   5  -6   3 1626.94   50.09
  -5  -6  -3 1639.94   54.09
  -5  -6  -3 1685.33   53.39
   5  -6   3 1601.34   46.30
   5   6   3 1717.63   54.69
  -5   6  -3 1638.54   40.20
   5   6   3 1718.63   66.39
  -5   6  -3 1634.94   41.00
   6  -6   3   20.90    5.30
  -6  -6  -3   20.70    5.70
   6  -6   3   20.70    4.80
  -6  -6  -3   31.50   10.70
   6  -6   3   24.80    6.40
   6   6   3   25.80    7.50
  -6   6  -3   26.60    3.60
   6   6   3   37.10   10.80
  -6   6  -3   26.80    3.30
  -7  -6  -3   40.60    8.50
  -7  -6  -3   48.10   11.80
   7  -6   3   48.50    7.60
   7  -6   3   31.50    8.40
   7  -6   3   41.80    7.90
   7   6   3   38.90    9.00
  -7   6  -3   44.20    4.30
   7   6   3   50.79   14.30
   8  -6   3   42.70   10.20
  -8  -6  -3   68.79   14.60
  -8  -6  -3   38.90   11.10
   8  -6   3   63.49   10.30
  -8   6  -3   49.50    8.80
   8   6   3   46.60   10.90
  -9  -6  -3   -3.40    1.90
   9  -6   3   -0.80    2.40
   9  -6   3    0.10    1.90
   9   6   3    4.50    4.90
   9   6   3    3.70    4.10
  -9   6  -3    2.80    1.70
  10  -6   3   22.40    7.20
 -10  -6  -3   30.80   12.10
  10  -6   3   42.10   12.50
  10   6   3   24.70    7.90
  10   6   3   29.10   11.60
 -11  -6  -3  555.54   42.20
  11  -6   3  514.35   36.50
  11  -6   3  551.34   30.90
  11   6   3  543.25   34.30
 -12  -6  -3    0.20    2.20
  12  -6   3    0.10    2.10
  12  -6   3    3.40    3.90
  12   6   3    3.50    5.20
  13  -6   3  327.07   33.20
  13  -6   3  388.86   28.00
  13   6   3  417.96   32.20
  14  -6   3    7.90    5.70
  14   6   3   15.50    8.60
  14  -7  -3   28.20   10.30
  14   7  -3   12.70    7.10
  13  -7  -3   22.30    9.60
  13   7  -3   11.30    8.10
  12  -7  -3  239.48   27.90
  12   7  -3  295.67   26.40
 -11  -7   3   37.40   12.70
  11  -7  -3   85.49   16.50
  11   7  -3   49.30   12.60
 -10  -7   3  101.89   22.00
  10  -7  -3  132.79   11.50
  10  -7  -3  123.79   18.70
  10   7  -3  138.19   40.90
  10   7  -3  147.79   21.70
   9  -7  -3  656.43   33.90
   9  -7  -3  687.83   27.00
  -9  -7   3  651.23   45.70
   9   7  -3  701.83   35.70
   9   7  -3  634.44   35.30
   9   7  -3  663.93   46.10
  -8  -7   3   92.99   14.50
   8  -7  -3   96.69   15.60
   8  -7  -3   72.29    7.20
  -8  -7   3   57.89   13.30
   8   7  -3  101.99   16.50
   8   7  -3   84.19   19.60
   8   7  -3   96.29   15.40
   7  -7  -3  130.09   15.50
   7  -7  -3  101.29    7.50
  -7  -7   3  113.79   15.50
  -7  -7   3  153.28   25.20
   7   7  -3   79.99   12.00
   7   7  -3   73.29   11.90
   6  -7  -3  194.48   15.00
  -6  -7   3  197.78   15.10
  -6  -7   3  234.68   23.30
   6  -7  -3  204.28   14.50
   6  -7  -3  198.48    9.80
   6   7  -3  202.68   15.40
   6   7  -3  186.08   15.30
  -5  -7   3  679.13   29.30
   5  -7  -3  695.83   28.50
  -5  -7   3  721.73   40.40
   5  -7  -3  715.33   21.00
   5  -7  -3  714.63   29.60
  -5  -7   3  713.53   29.90
   5   7  -3  669.33   29.20
   5   7  -3  705.83   30.30
   4  -7  -3   16.70    5.20
  -4  -7   3   17.50    5.50
  -4  -7   3   23.90    6.10
   4  -7  -3   25.20    3.40
  -4  -7   3   33.30   11.10
   4  -7  -3   25.20    5.70
   4   7  -3   18.10    5.00
   4   7  -3   20.70    5.50
  -3  -7   3 2162.08   73.49
   3  -7  -3 2075.09   60.09
  -3  -7   3 2108.99   59.89
  -3  -7   3 2140.79   60.79
   3   7  -3 2089.39   59.99
  -2  -7   3  883.11   30.50
  -2  -7   3  846.32   38.60
   2  -7  -3  893.81   31.30
  -2  -7   3  893.61   30.00
   2  -7  -3  910.31   27.40
   2   7  -3  938.11   30.40
  -2   7   3  878.11   30.70
   1  -7  -3  321.07   15.10
  -1  -7   3  313.57   14.50
  -1  -7   3  307.37   13.90
   1  -7  -3  280.87   15.20
   1   7  -3  296.37   13.50
  -1   7   3  305.17   12.90
  -1   7   3  298.37   15.30
   1   7  -3  311.47   13.80
   0  -7  -3  669.83   26.70
   0  -7   3  669.23   22.10
   0  -7  -3  667.83   25.60
   0  -7   3  630.44   22.10
   0   7  -3  701.33   21.40
   0   7  -3  670.63   21.60
   0   7   3  672.53   25.40
   0   7   3  625.74   25.30
   1  -7   3  762.12   24.10
   1  -7   3  785.52   24.00
  -1  -7  -3  812.92   29.50
  -1  -7  -3  758.52   31.80
  -1   7  -3  780.72   23.50
   1   7   3  770.82   31.70
   1   7   3  787.82   28.80
  -1   7  -3  766.62   21.90
   2  -7   3  270.97   11.60
  -2  -7  -3  262.07   18.30
   2  -7   3  255.97   11.10
  -2  -7  -3  233.38   14.70
  -2   7  -3  252.47    7.90
   2   7   3  270.17   18.70
  -2   7  -3  266.97   11.00
   2   7   3  247.18   14.70
   3  -7   3  714.43   22.80
   3  -7   3  703.23   23.00
   3  -7   3  719.83   23.40
  -3  -7  -3  701.73   34.60
   3   7   3  691.83   34.80
   3   7   3  719.63   29.00
  -4  -7  -3  379.36   25.80
   4  -7   3  389.76   15.70
  -4  -7  -3  364.46   19.70
   4  -7   3  376.86   16.40
  -4  -7  -3  365.66   20.50
   4  -7   3  394.96   16.10
   4   7   3  388.76   20.90
   4   7   3  366.86   25.90
  -5  -7  -3  489.35   27.80
   5  -7   3  472.75   19.10
  -5  -7  -3  505.15   24.60
   5  -7   3  463.75   20.60
  -5  -7  -3  428.26   29.50
   5  -7   3  498.35   20.10
   5   7   3  424.36   30.60
   5   7   3  473.75   24.50
   6  -7   3  277.77   15.70
   6  -7   3  308.77   17.90
   6  -7   3  326.47   16.10
  -6  -7  -3  311.17   25.80
  -6  -7  -3  312.37   19.90
   6   7   3  312.57   20.40
   6   7   3  287.77   26.20
   7  -7   3  266.07   18.30
  -7  -7  -3  263.37   24.90
  -7  -7  -3  266.97   19.10
   7  -7   3  296.37   16.90
   7   7   3  261.67   19.70
   7   7   3  269.97   26.50
  -8  -7  -3   13.20    8.20
   8  -7   3   20.10    6.40
   8  -7   3   19.60    5.90
  -8  -7  -3   15.60    5.70
   8   7   3   14.10    8.20
   8   7   3    7.00    4.80
   9  -7   3  648.74   35.70
  -9  -7  -3  640.74   43.50
   9  -7   3  643.44   30.50
   9   7   3  621.44   34.60
   9   7   3  641.74   59.49
  10  -7   3  143.69   21.00
  10  -7   3  131.89   16.60
 -10  -7  -3  184.58   30.50
  10   7   3  117.79   19.50
  11  -7   3   62.19   12.50
 -11  -7  -3  100.79   23.20
  11  -7   3   70.79   15.70
  11   7   3   84.99   17.10
  12  -7   3  273.67   27.00
  12  -7   3  227.68   20.20
  12   7   3  246.98   29.90
  13  -7   3   87.49   15.80
  13  -7   3   89.89   20.80
  13   7   3  111.49   20.00
  14  -7   3   24.40    9.00
  14   7   3   34.50   13.60
  14  -8  -3  170.58   25.00
  14   8  -3  132.69   23.60
  13  -8  -3   46.30   13.50
  13   8  -3   24.00   10.10
  12  -8  -3   27.70    9.40
  12   8  -3   51.39   14.80
 -11  -8   3   10.20    9.10
  11  -8  -3   13.80    8.00
  11   8  -3   10.40    7.20
 -10  -8   3  347.67   34.70
  10  -8  -3  338.27   24.70
  10   8  -3  317.37   25.70
   9  -8  -3   -0.90    2.10
  -9  -8   3   -2.00    2.10
   9  -8  -3    4.20    3.10
   9   8  -3    0.60    3.50
  -8  -8   3 1003.10   44.00
   8  -8  -3 1077.09   43.80
  -8  -8   3 1075.99   59.39
   8  -8  -3 1060.19   33.60
   8   8  -3 1061.59   45.00
   8   8  -3 1042.20   45.80
   7  -8  -3  199.98   10.40
   7  -8  -3  202.58   16.10
  -7  -8   3  188.58   16.10
  -7  -8   3  222.28   31.00
   7   8  -3  195.08   16.60
   7   8  -3  229.18   18.30
  -6  -8   3   27.30   10.70
   6  -8  -3   29.20    7.60
  -6  -8   3   10.10    4.10
   6  -8  -3   23.50    3.80
   6   8  -3   13.70    5.60
   6   8  -3   22.10    6.40
   5  -8  -3  142.79   11.80
  -5  -8   3  108.39   10.90
   5  -8  -3  113.59   14.10
  -5  -8   3  133.39   11.90
  -5  -8   3  123.19   21.20
   5   8  -3  137.59   15.40
   5   8  -3  150.68   12.70
   4  -8  -3 1229.58   41.80
  -4  -8   3 1243.68   54.99
   4  -8  -3 1229.18   42.40
  -4  -8   3 1294.07   43.20
   4  -8  -3 1241.98   32.10
   4   8  -3 1237.68   42.60
  -4   8   3 1220.48   41.50
   4   8  -3 1154.48   41.20
   3  -8  -3   47.80    4.20
  -3  -8   3   44.90    8.10
   3  -8  -3   37.70    7.50
  -3  -8   3   21.20    7.10
  -3  -8   3   40.30    7.50
  -3   8   3   54.59    8.20
   3   8  -3   39.60    7.30
  -2  -8   3 1925.51   57.39
   2  -8  -3 1989.20   58.99
  -2  -8   3 2026.80   57.39
  -2  -8   3 2134.09   70.79
   2   8  -3 2095.49   57.79
  -2   8   3 2097.29   58.99
   2   8  -3 2005.80   56.79
   1  -8  -3  150.68   10.60
   1  -8  -3  140.29   10.90
  -1  -8   3  139.69    9.50
  -1  -8   3  149.09   14.10
  -1  -8   3  156.38   10.10
   1   8  -3  151.18    9.30
   1   8  -3  158.28    9.90
  -1   8   3  153.68    8.30
  -1   8   3  136.99   10.50
   0  -8   3  403.96   16.70
   0  -8   3  408.36   16.80
   0  -8  -3  448.76   21.50
   0  -8  -3  395.66   19.40
   0   8   3  398.36   19.30
   0   8  -3  417.36   16.50
   0   8   3  440.86   20.00
   1  -8   3  473.15   17.40
  -1  -8  -3  459.55   24.20
  -1  -8  -3  482.65   22.10
   1  -8   3  468.95   17.60
   1   8   3  450.85   21.20
  -1   8  -3  477.55   17.20
  -1   8  -3  445.36   14.50
   1   8   3  435.26   23.30
   2  -8   3  920.51   28.80
   2  -8   3  994.40   28.90
  -2  -8  -3  861.71   38.40
  -2  -8  -3  966.10   40.70
  -2   8  -3  986.50   28.90
   2   8   3  988.90   35.50
  -3  -8  -3   26.70    6.00
  -3  -8  -3   20.30    6.80
   3  -8   3   36.20    5.70
   3  -8   3   33.10    5.20
   3  -8   3   28.30    4.70
  -3  -8  -3   23.10    5.40
   3   8   3   30.90    7.20
   3   8   3   24.10    7.70
   4  -8   3 1416.26   40.60
  -4  -8  -3 1455.35   57.99
   4  -8   3 1424.26   40.50
  -4  -8  -3 1387.56   47.10
  -4  -8  -3 1321.97   47.90
   4  -8   3 1434.66   41.10
   4   8   3 1269.17   49.80
   4   8   3 1376.66   57.49
   5  -8   3   65.49    8.30
  -5  -8  -3   80.49   12.60
  -5  -8  -3   60.39   13.80
   5  -8   3   75.49    8.80
   5  -8   3   66.99    9.00
   5   8   3   84.39   16.90
   5   8   3   83.19   13.40
   6  -8   3   11.70    4.40
  -6  -8  -3    9.20    4.60
   6  -8   3   18.80    4.80
  -6  -8  -3   23.50   10.10
   6  -8   3   12.10    4.20
   6   8   3   10.40    4.80
   6   8   3   13.70    6.80
  -7  -8  -3   82.29   14.30
  -7  -8  -3   39.60   11.90
   7  -8   3   60.29    9.00
   7  -8   3   71.39   11.70
   7  -8   3   79.59   11.20
   7   8   3   44.60   10.20
  -8  -8  -3  539.35   39.00
   8  -8   3  524.15   24.80
   8  -8   3  567.84   29.70
  -8  -8  -3  527.15   29.90
   8  -8   3  575.54   26.90
   8   8   3  537.55   31.20
  -9  -8  -3    6.70    6.10
   9  -8   3   -0.50    2.20
   9  -8   3    2.00    3.20
   9   8   3   -1.10    2.70
 -10  -8  -3  374.06   34.50
  10  -8   3  325.47   25.60
  10  -8   3  374.56   23.50
  10   8   3  327.57   40.60
  11  -8   3   63.59   13.00
 -11  -8  -3   46.80   17.60
  11  -8   3   47.10   12.60
  11   8   3   40.80   12.00
  12  -8   3    0.40    2.30
  12  -8   3   -0.60    1.90
  12   8   3    5.50    5.30
  13  -8   3   39.40   13.40
  13  -8   3   43.90   11.80
  13   8   3   54.59   14.70
  14  -9  -3   95.89   19.70
  14   9  -3  126.69   24.70
  13  -9  -3    5.80    7.00
 -13  -9   3    0.30    3.30
  13   9  -3   -1.50    3.60
  12  -9  -3  215.88   25.80
  12   9  -3  297.37   27.00
 -11  -9   3   17.00    9.40
  11  -9  -3   12.40    6.70
  11   9  -3   21.80    9.70
  10  -9  -3  144.69   20.00
 -10  -9   3  214.28   36.60
   9  -9  -3  169.28   21.30
  -9  -9   3  103.49   19.90
   9   9  -3  154.28   20.00
   8  -9  -3  530.25   20.00
   8  -9  -3  505.05   28.60
  -8  -9   3  506.05   37.00
   8   9  -3  577.44   31.90
  -7  -9   3  109.09   26.10
   7  -9  -3   91.39    6.50
  -7  -9   3  124.49   17.20
   7  -9  -3  113.29   16.50
   7   9  -3  112.59   15.40
   7   9  -3  108.59   15.60
  -6  -9   3  702.93   33.20
   6  -9  -3  750.02   22.00
   6  -9  -3  753.02   33.00
  -6  -9   3  779.82   46.80
   6   9  -3  773.92   34.20
   6   9  -3  750.62   34.40
  -5  -9   3  103.29   20.70
   5  -9  -3   61.09    9.60
  -5  -9   3   69.99   11.00
   5  -9  -3   75.29    4.50
   5   9  -3   84.19   11.70
   5   9  -3   79.29   12.20
  -4  -9   3  344.67   19.40
   4  -9  -3  313.07   11.20
  -4  -9   3  313.47   18.60
   4  -9  -3  325.77   18.50
  -4  -9   3  351.66   27.50
   4   9  -3  328.07   19.10
  -4   9   3  316.67   18.20
   4   9  -3  313.47   18.20
  -3  -9   3   31.20    6.50
  -3  -9   3   31.80    9.00
   3  -9  -3   28.40    4.20
   3  -9  -3   50.19    8.90
  -3  -9   3   36.80    7.50
   3   9  -3   30.70    6.50
  -3   9   3   36.50    7.90
  -2  -9   3  304.97   22.70
   2  -9  -3  305.37   14.40
  -2  -9   3  287.27   16.00
   2  -9  -3  289.97   16.80
  -2  -9   3  294.37   16.00
  -2   9   3  301.67   16.70
   2   9  -3  306.97   16.10
   2   9  -3  294.37   15.20
   1  -9  -3    3.60    2.60
  -1  -9   3    3.20    2.40
  -1  -9   3    3.60    2.40
   1  -9  -3    6.20    3.80
  -1  -9   3    1.80    2.50
   1   9  -3    3.10    2.20
   1   9  -3    2.70    1.90
  -1   9   3    6.30    3.20
   0  -9  -3 1197.28   41.90
   0  -9  -3 1165.08   40.40
   0  -9   3 1121.49   35.70
   0  -9   3 1103.19   38.20
   0   9   3 1145.59   39.40
   0   9  -3 1152.18   33.00
   0   9   3 1147.49   38.70
   0   9  -3 1195.28   35.60
   1  -9   3  138.09    9.10
  -1  -9  -3  132.39   11.40
  -1  -9  -3  153.78   13.90
   1  -9   3  145.09    8.80
  -1   9  -3  141.99    8.90
   1   9   3  146.19   11.70
   1   9   3  129.69   12.20
  -2  -9  -3  155.88   12.70
  -2  -9  -3  127.89   16.30
   2  -9   3  141.39    8.50
  -2  -9  -3  142.69   11.00
   2  -9   3  137.99    8.90
  -2   9  -3  171.68    9.50
   2   9   3  137.49   17.80
   2   9   3  126.09   11.50
   3  -9   3  100.29    7.70
  -3  -9  -3  102.29    9.90
  -3  -9  -3  119.69   15.30
  -3  -9  -3  156.78   21.70
   3  -9   3  105.19    7.30
   3  -9   3  106.59    8.10
   3   9   3  125.89   18.70
   3   9   3   81.39   11.30
   4  -9   3  169.08   10.80
   4  -9   3  184.08   11.00
  -4  -9  -3  199.68   14.70
  -4  -9  -3  150.48   19.80
   4  -9   3  169.38   10.00
   4   9   3  198.88   25.10
   4   9   3  179.38   14.80
  -5  -9  -3   54.59   10.10
   5  -9   3   54.09    7.90
  -5  -9  -3   78.29   17.00
   5  -9   3   76.69    9.10
   5  -9   3   58.19    8.30
   5   9   3   51.09   10.30
   6  -9   3 1569.94   49.50
   6  -9   3 1588.94   48.70
  -6  -9  -3 1594.54   56.79
   6  -9   3 1613.94   49.80
   6   9   3 1669.23   58.59
   7  -9   3    4.30    3.00
   7  -9   3    8.90    3.50
  -7  -9  -3    3.60    6.30
  -7  -9  -3    1.40    2.80
   7  -9   3    6.60    3.40
   7   9   3   17.60    7.40
   8  -9   3  181.98   15.70
  -8  -9  -3  234.18   33.40
   8  -9   3  203.98   15.10
  -8  -9  -3  187.18   17.50
   8   9   3  223.68   25.30
   9  -9   3   28.80    7.60
  -9  -9  -3   60.89   18.40
   9  -9   3   32.00    8.80
   9   9   3   22.60    8.20
  10  -9   3   96.89   15.10
 -10  -9  -3   69.79   19.40
  10  -9   3   92.59   16.40
  10   9   3   86.99   20.60
 -11  -9  -3    9.70    7.50
  11  -9   3    6.30    4.90
  11  -9   3    3.00    3.60
  11   9   3    0.70    3.40
  12  -9   3  338.27   25.20
  12  -9   3  389.56   31.00
  12   9   3  332.67   28.90
  13  -9   3    3.90    4.20
  13  -9   3   14.50    6.90
 -13  -9  -3    1.30    4.00
  13   9   3   -0.30    3.60
  13 -10  -3  184.78   25.80
  13  10  -3  184.48   29.50
 -12 -10   3    8.60    7.00
  12 -10  -3    9.90    6.20
  12  10  -3   37.10   12.10
 -11 -10   3  204.68   35.80
  11 -10  -3  202.08   23.80
  11  10  -3  170.88   23.80
 -10 -10   3   98.49   21.90
  10 -10  -3  130.69   20.20
  10  10  -3  114.29   18.50
   9 -10  -3   68.99   13.40
   9  10  -3  100.59   16.70
   8 -10  -3  160.58   19.10
  -8 -10   3  188.68   29.60
  -8 -10   3  238.88   37.50
   8  10  -3  153.08   19.60
   7 -10  -3  304.07   20.90
  -7 -10   3  194.38   28.40
  -7 -10   3  331.37   22.50
   7 -10  -3  296.37   11.70
   7  10  -3  324.77   22.90
  -6 -10   3   19.50    5.70
   6 -10  -3   24.20    3.10
   6 -10  -3   19.60    6.00
  -6 -10   3   27.40   12.40
   6  10  -3   23.90    7.10
   6  10  -3   33.30    9.10
  -5 -10   3  121.89   19.90
   5 -10  -3   68.09   10.70
  -5 -10   3   79.59   17.40
   5 -10  -3   70.79    4.00
   5  10  -3   97.19   14.20
   5  10  -3   64.49   10.90
  -4 -10   3  336.97   20.10
   4 -10  -3  364.46   12.20
  -4 -10   3  341.37   28.10
  -4 -10   3  336.37   20.00
  -4  10   3  333.17   19.30
  -3 -10   3  107.89   12.90
   3 -10  -3  115.79    7.50
  -3 -10   3  105.69   17.70
  -3 -10   3  116.49   10.80
   3 -10  -3  126.09   11.30
   3  10  -3  128.19   14.00
   3  10  -3  128.29   10.70
   2 -10  -3  413.16   21.40
  -2 -10   3  372.86   26.50
  -2 -10   3  390.76   19.80
   2 -10  -3  406.26   18.00
  -2 -10   3  386.56   19.60
   2  10  -3  397.16   18.60
   2  10  -3  436.86   20.30
  -2  10   3  403.26   20.80
  -1 -10   3 1033.90   44.40
   1 -10  -3  958.70   35.30
  -1 -10   3  975.00   34.20
   1 -10  -3  970.50   36.60
  -1 -10   3  963.10   33.60
   1  10  -3  964.50   33.30
  -1  10   3 1034.00   36.60
   0 -10   3   29.90    8.30
   0 -10  -3   13.90    4.70
   0 -10  -3   13.30    5.10
   0 -10   3   23.90    5.40
   0 -10   3   21.30    4.90
   0  10  -3   24.30    5.20
   0  10   3   16.90    4.70
   0  10   3   12.10    4.70
  -1 -10  -3  345.97   22.30
   1 -10   3  371.06   17.00
  -1 -10  -3  326.97   19.50
   1 -10   3  372.66   16.00
  -1  10  -3  387.16   16.60
   2 -10   3  525.65   19.10
  -2 -10  -3  444.86   28.00
  -2 -10  -3  511.85   23.50
   2 -10   3  490.25   20.30
  -2  10  -3  528.95   20.10
   2  10   3  510.55   25.10
  -3 -10  -3   66.39   10.70
  -3 -10  -3   76.19   16.00
   3 -10   3   62.29    8.20
   3 -10   3   54.09    5.30
   3  10   3   58.69   10.70
  -3  10  -3   61.49    7.90
  -4 -10  -3  393.76   28.90
   4 -10   3  360.56   17.30
   4 -10   3  371.96   15.90
   4 -10   3  364.56   17.50
  -4 -10  -3  398.16   22.10
   4  10   3  428.36   23.80
   5 -10   3 1162.38   39.60
   5 -10   3 1205.78   39.50
   5 -10   3 1259.77   38.20
  -5 -10  -3 1240.98   58.09
   5  10   3 1327.97   49.20
   6 -10   3   11.10    4.20
   6 -10   3    5.60    3.00
  -6 -10  -3    1.10    3.00
  -6 -10  -3   13.60    8.00
   6  10   3    0.90    3.60
   7 -10   3  351.56   19.00
   7 -10   3  376.26   20.30
  -7 -10  -3  358.46   31.80
  -7 -10  -3  352.86   23.90
   7 -10   3  340.07   19.30
   7  10   3  351.66   24.70
   8 -10   3  349.96   21.30
   8 -10   3  330.97   20.10
  -8 -10  -3  340.87   25.90
  -8 -10  -3  362.46   33.20
   8  10   3  393.36   26.80
  -9 -10  -3    7.50    7.60
   9 -10   3   16.80    6.00
   9  10   3    5.00    5.20
 -10 -10  -3  207.18   30.70
  10 -10   3  274.17   21.80
  10 -10   3  254.17   19.40
  10  10   3  280.57   24.60
  11 -10   3  159.78   20.20
 -11 -10  -3  199.18   33.60
  11 -10   3  155.58   22.00
  11  10   3  139.59   20.60
  12 -10   3    6.40    6.00
 -12 -10  -3   -0.10    2.70
  12  10   3    7.10    5.30
  13 -10   3  193.18   27.10
  13 -10   3  179.98   23.30
  13  10   3  149.69   23.10
 -13 -11   3    4.10    5.50
  13 -11  -3   19.50    9.60
  13  11  -3   14.60    8.00
  12 -11  -3   24.50    9.80
 -12 -11   3    9.10    8.20
  12  11  -3   19.70    9.30
  11 -11  -3  149.69   22.10
 -11 -11   3  108.39   24.30
  11  11  -3  166.68   24.00
 -10 -11   3    4.40    5.60
  10  11  -3   10.90    6.20
  -9 -11   3  515.25   43.70
   9 -11  -3  458.35   28.60
  -9 -11   3  386.86   32.00
   9  11  -3  391.76   47.00
  -8 -11   3    7.90    7.40
   8 -11  -3    4.70    4.20
  -8 -11   3   15.30    7.10
   8  11  -3   18.40    8.10
   7 -11  -3  112.49   15.60
  -7 -11   3   97.19   13.90
  -7 -11   3   59.29   14.90
   7  11  -3  104.69   15.80
  -6 -11   3  142.29   27.00
   6 -11  -3  164.78   19.10
  -6 -11   3  103.49   13.20
   6  11  -3  141.29   18.40
  -5 -11   3  295.47   20.00
  -5 -11   3  297.87   28.50
   5 -11  -3  267.37   18.80
   5  11  -3  278.87   19.40
  -4 -11   3    4.80    4.80
   4 -11  -3   20.30    3.20
  -4 -11   3   11.60    4.50
   4  11  -3   17.10    6.20
  -4  11   3   13.20    4.90
   3 -11  -3  900.81   28.40
  -3 -11   3  872.51   35.20
  -3 -11   3  919.81   47.50
  -3 -11   3  867.31   34.90
  -3  11   3  889.91   35.20
   3  11  -3  915.21   35.60
   2 -11  -3    5.70    3.20
  -2 -11   3    7.30    3.40
  -2 -11   3    4.60    2.70
  -2 -11   3    9.30    5.60
  -2  11   3    3.80    3.30
   2  11  -3    3.60    2.90
  -1 -11   3  276.27   15.80
   1 -11  -3  257.67   16.50
  -1 -11   3  308.77   23.00
  -1 -11   3  275.27   16.10
   1  11  -3  289.07   15.90
  -1  11   3  263.77   17.00
   0 -11   3   58.79   12.40
   0 -11  -3   59.09    8.60
   0 -11  -3   59.19   11.10
   0 -11   3   46.20    7.30
   0 -11   3   56.19    8.40
   0  11   3   47.10    8.30
   0  11  -3   51.49    7.90
   1 -11   3  227.78   13.60
   1 -11   3  230.88   17.50
  -1 -11  -3  218.08   18.10
   1 -11   3  224.18   12.30
  -1 -11  -3  243.88   16.70
  -1  11  -3  214.08   12.70
   1  11   3  240.78   16.50
  -2 -11  -3   39.00    8.00
   2 -11   3   36.00    5.80
   2 -11   3   29.80    6.00
  -2 -11  -3   39.90   11.20
  -2  11  -3   33.80    6.30
   2  11   3   38.70    8.90
  -3 -11  -3 1260.67   44.10
  -3 -11  -3 1211.68   53.59
   3 -11   3 1150.48   38.10
   3 -11   3 1188.88   35.50
  -3  11  -3 1145.19   37.20
   3  11   3 1247.68   46.20
   4 -11   3   43.40    6.30
  -4 -11  -3   46.40   10.10
   4 -11   3   54.79    8.40
  -4 -11  -3   35.00   11.80
   4 -11   3   48.40    7.80
   4  11   3   48.70    9.80
  -5 -11  -3  324.67   28.50
   5 -11   3  359.46   18.30
   5 -11   3  348.67   16.00
   5 -11   3  336.87   17.70
  -5 -11  -3  362.16   22.90
   5  11   3  374.36   23.80
   6 -11   3  140.09   11.20
   6 -11   3  114.69   10.50
  -6 -11  -3  130.29   17.50
   6 -11   3  134.09   11.30
  -6 -11  -3  143.09   23.30
   6  11   3  125.79   17.00
  -7 -11  -3  250.27   20.30
   7 -11   3  215.58   15.00
   7 -11   3  235.68   15.00
   7 -11   3  241.68   16.30
  -7 -11  -3  294.47   38.00
   7  11   3  225.78   20.10
   8 -11   3   16.10    5.70
   8 -11   3   16.10    5.50
  -8 -11  -3   26.60   12.30
  -8 -11  -3    6.20    6.70
   8  11   3   23.00    8.60
   9 -11   3  727.03   33.50
  -9 -11  -3  734.43   50.69
   9 -11   3  657.33   31.90
   9  11   3  658.33   38.80
  10 -11   3   12.50    6.00
 -10 -11  -3   23.50   11.20
  10 -11   3   12.90    6.00
  10  11   3   27.00   10.60
  11 -11   3  131.79   18.70
  11 -11   3  104.89   17.50
 -11 -11  -3  105.49   25.40
  11  11   3   74.09   16.10
  12 -11   3   30.60   10.10
  12 -11   3   30.10    9.10
  12  11   3   22.80   10.70
  12 -12  -3    1.90    3.40
 -12 -12   3   15.20   10.00
  12  12  -3    2.10    4.10
 -11 -12   3   99.69   23.40
  11 -12  -3  138.89   20.80
  11  12  -3  110.59   20.80
  10 -12  -3    0.30    2.60
 -10 -12   3   -1.70    2.60
  10  12  -3    0.10    3.10
  -9 -12   3    6.50    7.30
   9 -12  -3    6.30    5.20
  -9 -12   3    5.00    4.60
   9  12  -3   12.00    6.60
   8 -12  -3   45.00   10.90
  -8 -12   3   39.50   13.40
  -8 -12   3   51.79   12.40
   8  12  -3   49.60   12.20
  -7 -12   3  602.44   45.40
  -7 -12   3  534.15   31.30
   7 -12  -3  513.05   29.30
   7  12  -3  547.05   31.70
  -6 -12   3    3.60    4.00
  -6 -12   3   -2.80    2.00
   6 -12  -3    1.90    2.60
   6  12  -3   -1.10    1.60
  -5 -12   3  364.76   32.20
  -5 -12   3  276.07   20.20
   5 -12  -3  299.77   20.50
   5  12  -3  297.97   20.80
  -4 -12   3   78.49   17.90
  -4 -12   3   87.19   13.80
   4 -12  -3   69.19    5.00
   4  12  -3   84.79   12.90
  -4  12   3   91.29   13.30
   3 -12  -3   26.00    5.10
  -3 -12   3   32.30   10.80
  -3 -12   3   25.20    7.00
   3  12  -3   20.00    6.10
  -3  12   3   36.30    8.30
  -2 -12   3   41.90    8.70
  -2 -12   3   39.40   11.90
  -2 -12   3   32.00    7.50
   2 -12  -3   27.00    4.90
   2 -12  -3   23.90    5.90
   2  12  -3   37.50    8.20
  -2  12   3   21.30    6.20
  -1 -12   3  626.34   35.80
  -1 -12   3  639.24   27.90
   1 -12  -3  638.34   28.90
  -1 -12   3  642.04   26.80
   1 -12  -3  651.83   24.30
   1  12  -3  650.43   27.10
  -1  12   3  678.73   29.90
   0 -12   3   70.09    9.40
   0 -12   3   53.39   11.90
   0 -12  -3   60.19   11.20
   0 -12  -3   65.09    8.80
   0  12   3   64.49   11.30
   0  12  -3   62.49    8.80
   1 -12   3 1699.53   49.10
  -1 -12  -3 1680.73   52.49
   1 -12   3 1623.24   51.39
  -1 -12  -3 1756.62   62.49
   1 -12   3 1731.53   60.09
   1  12   3 1709.03   56.89
  -1  12  -3 1611.14   49.80
  -2 -12  -3   -1.60    2.40
   2 -12   3    4.30    3.40
  -2 -12  -3    6.40    4.10
   2 -12   3   -1.00    1.20
   2 -12   3    3.70    2.20
   2  12   3    4.80    3.80
  -2  12  -3    1.40    2.40
  -3 -12  -3   19.30    5.90
   3 -12   3   19.20    5.20
   3 -12   3   22.60    4.70
  -3 -12  -3   23.00    8.70
  -3  12  -3   23.50    5.30
   3  12   3   23.80    7.40
   4 -12   3   30.50    5.30
   4 -12   3   32.70    6.50
   4 -12   3   27.60    6.90
  -4 -12  -3   32.90   11.50
  -4 -12  -3   30.70    7.10
   4  12   3   35.80    9.40
   5 -12   3  590.54   25.80
   5 -12   3  600.44   25.80
  -5 -12  -3  612.44   40.60
   5 -12   3  668.03   26.10
  -5 -12  -3  546.95   30.00
   5  12   3  636.04   33.10
   6 -12   3   62.99    9.80
  -6 -12  -3   74.19   12.70
   6 -12   3   65.39   13.10
  -6 -12  -3   91.59   20.90
   6 -12   3   68.79    8.80
   6  12   3   72.29   14.40
  -7 -12  -3  560.54   32.40
   7 -12   3  571.34   24.00
   7 -12   3  553.44   26.60
  -7 -12  -3  594.74   43.10
   7  12   3  529.55   32.50
   8 -12   3   34.50    7.30
  -8 -12  -3    8.00    6.70
   8 -12   3   31.00    8.20
  -8 -12  -3   31.60   13.10
   8  12   3   17.10    7.10
   9 -12   3   35.20    9.10
  -9 -12  -3   21.20   11.20
   9 -12   3   17.90    6.30
   9  12   3   14.40    7.50
  10 -12   3   12.70    5.50
 -10 -12  -3    7.30    6.90
  10 -12   3   24.00    7.40
  10  12   3   17.00    8.40
  11 -12   3  264.77   21.00
  11 -12   3  267.27   21.30
 -11 -12  -3  234.58   38.10
  11  12   3  279.97   33.60
  12 -12   3   -1.20    1.80
 -12 -12  -3    7.80    8.80
  12 -12   3   -1.30    2.00
  12  12   3   -1.20    2.60
  12 -13  -3   69.59   15.20
  12  13  -3   73.19   24.00
 -11 -13   3    0.60    4.60
  11 -13  -3   14.30    7.90
  11  13  -3   25.50   11.30
 -10 -13   3   39.60   14.60
  10 -13  -3   87.19   17.00
  10  13  -3   76.89   15.70
   9 -13  -3  218.48   37.10
  -9 -13   3  268.67   43.80
   9  13  -3  192.58   25.20
  -8 -13   3   69.59   14.30
  -8 -13   3   58.69   16.10
   8 -13  -3   57.29   12.00
  -7 -13   3   12.10    9.80
   7 -13  -3   14.10    6.70
  -7 -13   3    7.90    4.90
   7  13  -3    7.40    6.00
  -6 -13   3  201.98   28.50
   6 -13  -3  247.88   19.30
  -6 -13   3  215.28   18.90
   6  13  -3  231.78   19.60
   5 -13  -3  108.89   16.00
  -5 -13   3   73.89   13.40
  -5 -13   3   70.89   18.70
   5  13  -3   78.29   13.60
  -4 -13   3   52.69   11.10
  -4 -13   3   47.80   14.90
   4 -13  -3   36.00    3.30
   4 -13  -3   38.60    4.60
  -4  13   3   34.80    8.70
   4  13  -3   29.90    7.50
  -3 -13   3  444.56   24.30
   3 -13  -3  439.36   16.10
   3 -13  -3  433.36   18.60
  -3 -13   3  389.46   31.80
  -3  13   3  436.16   24.20
   3  13  -3  419.06   23.60
   2 -13  -3  190.58   10.90
  -2 -13   3  202.78   26.70
   2 -13  -3  186.78   13.40
  -2 -13   3  201.48   14.90
   2  13  -3  193.88   14.80
  -2  13   3  212.38   16.20
  -1 -13   3   67.59    9.80
   1 -13  -3   59.99    8.10
   1 -13  -3   59.79   10.80
  -1 -13   3   65.79   15.00
  -1 -13   3   50.29    9.80
  -1  13   3   66.49   12.00
   0 -13   3  809.92   32.90
   0 -13   3  863.31   31.60
   0 -13  -3  818.02   31.00
   0 -13  -3  787.82   37.10
   0 -13   3  851.61   41.60
   0  13  -3  889.01   32.50
   0  13   3  837.42   35.90
   1 -13   3   99.89   12.50
   1 -13   3  103.09    8.90
  -1 -13  -3   98.59   10.00
   1 -13   3  113.79   17.10
  -1 -13  -3   96.59   15.40
   1  13   3   95.99   13.30
  -1  13  -3  106.99    9.70
  -2 -13  -3  148.29   12.80
  -2 -13  -3  151.38   22.30
   2 -13   3  122.69    9.30
   2 -13   3  135.49   13.60
   2 -13   3  118.99   10.50
  -2  13  -3  120.59   10.20
   2  13   3  119.09   15.00
  -3 -13  -3  348.47   28.00
   3 -13   3  318.77   18.00
   3 -13   3  375.76   21.10
   3 -13   3  363.06   16.10
  -3 -13  -3  378.56   22.30
   3  13   3  305.87   21.80
  -3  13  -3  338.87   17.80
   4 -13   3   28.40    6.70
  -4 -13  -3    6.40    5.00
   4 -13   3   13.90    4.80
  -4 -13  -3   25.70    7.90
   4  13   3   23.00    8.20
   5 -13   3   56.09    9.70
  -5 -13  -3   38.70   11.70
  -5 -13  -3   45.00   10.40
   5 -13   3   51.99    6.90
   5  13   3   53.59   11.60
   6 -13   3  322.37   15.10
   6 -13   3  329.77   19.10
  -6 -13  -3  306.17   22.90
  -6 -13  -3  434.06   35.50
   6  13   3  315.87   24.10
   7 -13   3  100.59    8.30
  -7 -13  -3  117.49   18.80
   7 -13   3   69.09   11.60
  -7 -13  -3   59.79   15.80
   7  13   3   75.79   14.30
  -8 -13  -3   11.30    7.10
   8 -13   3    5.80    4.40
  -8 -13  -3    6.50    6.20
   8 -13   3    2.90    2.60
   8  13   3    4.90    5.30
  -9 -13  -3  123.49   27.00
   9 -13   3  115.39   10.80
   9 -13   3  138.09   17.50
   9  13   3  129.19   20.00
  10 -13   3   90.49   14.30
  10 -13   3  109.99   14.20
 -10 -13  -3   70.59   21.90
  10  13   3   72.89   15.90
  11 -13   3   47.30   11.20
  11  13   3   26.50   10.60
  11 -14  -3   20.10    8.40
 -11 -14   3    6.40    8.40
  11  14  -3   14.60    8.90
  10 -14  -3  267.47   23.50
 -10 -14   3  232.68   47.30
  10  14  -3  244.38   29.30
   9 -14  -3   -0.30    2.10
  -9 -14   3   -1.90    3.00
   9  14  -3   -1.70    2.70
  -8 -14   3  222.78   37.90
   8 -14  -3  208.68   27.70
   8  14  -3  247.58   22.50
  -7 -14   3   27.80   12.20
   7 -14  -3   18.10    6.90
  -7 -14   3    5.80    4.40
   7  14  -3   14.80    7.00
   6 -14  -3    1.50    3.30
  -6 -14   3   -2.40    3.50
  -6 -14   3    1.00    2.50
   6  14  -3   -3.20    1.90
  -5 -14   3   55.39   12.30
  -5 -14   3   36.20   13.50
   5 -14  -3   47.70   10.90
   5  14  -3   66.89   13.50
   4 -14  -3  864.81   24.10
  -4 -14   3  833.22   51.29
  -4 -14   3  812.52   37.80
   4 -14  -3  871.41   25.80
  -4  14   3  869.81   37.70
   4  14  -3  933.81   39.20
  -3 -14   3    6.30    3.70
   3 -14  -3    7.20    3.30
  -3 -14   3   17.30    9.10
   3 -14  -3   11.30    3.10
  -3  14   3   16.10    6.60
   3  14  -3   13.20    5.80
  -2 -14   3  439.26   32.50
   2 -14  -3  389.16   17.20
  -2 -14   3  386.06   25.30
   2 -14  -3  393.16   20.90
   2  14  -3  404.56   22.70
  -2  14   3  384.56   23.20
   1 -14  -3   32.60    6.50
  -1 -14   3   17.30    5.30
  -1 -14   3   28.20   10.50
   1 -14  -3   16.40    6.00
   1  14  -3   24.90    7.10
  -1  14   3   26.80    8.00
   0 -14  -3   15.30    6.60
   0 -14  -3   20.50    5.80
   0 -14   3   28.90   10.00
   0 -14   3   18.20    5.40
   0  14   3   23.20    7.50
   0  14  -3   17.10    5.70
  -1 -14  -3    2.20    2.60
  -1 -14  -3    4.40    4.50
   1 -14   3    0.50    2.00
   1 -14   3    0.10    1.40
   1 -14   3   -0.40    2.70
   1  14   3   -0.20    2.80
   2 -14   3  798.92   29.10
  -2 -14  -3  799.32   43.00
   2 -14   3  887.91   38.50
   2 -14   3  806.22   32.90
  -2  14  -3  844.82   34.80
   2  14   3  805.82   37.40
   3 -14   3   -1.30    1.60
  -3 -14  -3   -1.00    1.20
  -3 -14  -3   -0.90    3.50
   3 -14   3   -0.10    1.30
   3 -14   3    2.20    2.00
   3  14   3   -2.10    1.50
  -3  14  -3    5.90    4.10
   4 -14   3  183.98   11.10
   4 -14   3  208.48   14.50
   4 -14   3  197.58   14.50
  -4 -14  -3  227.88   31.10
  -4 -14  -3  191.28   16.80
   4 -14   3  197.48   14.50
   4  14   3  204.58   18.30
   5 -14   3    0.70    1.70
  -5 -14  -3    4.90    6.80
  -5 -14  -3    3.60    3.70
   5 -14   3    1.40    2.30
   5  14   3   -1.10    2.50
  -6 -14  -3    2.70    3.20
   6 -14   3    2.10    1.70
   6 -14   3   -0.30    1.80
  -6 -14  -3   -1.10    3.30
   6  14   3    3.10    5.10
  -7 -14  -3    4.80    3.70
   7 -14   3   13.30    5.20
  -7 -14  -3    8.90    7.80
   7  14   3   15.20    7.50
   8 -14   3  329.47   21.10
  -8 -14  -3  373.96   47.10
   8  14   3  293.97   25.60
  -9 -14  -3   -1.10    3.30
   9 -14   3    2.20    2.40
   9 -14   3    5.10    3.80
   9  14   3    8.10    5.50
 -10 -14  -3  228.38   38.60
  10 -14   3  210.08   18.00
  10 -14   3  190.18   12.90
  10  14   3  218.78   28.10
  11 -14   3   -0.70    1.70
 -11 -14  -3   -0.80    2.80
  11  14   3    7.70    6.90
  11 -15  -3   16.20    8.10
  11  15  -3   19.30    9.70
 -10 -15   3    6.90    7.80
  10 -15  -3   29.90   10.10
  10  15  -3   30.30   10.80
  -9 -15   3  101.69   26.90
   9 -15  -3   58.59   13.70
   9  15  -3   85.89   17.20
  -8 -15   3   95.19   23.90
   8 -15  -3  160.98   22.30
   8  15  -3  178.78   23.20
  -7 -15   3   10.30    6.00
   7 -15  -3    6.40    4.50
   7  15  -3   12.00    6.00
  -6 -15   3  488.65   42.50
   6 -15  -3  450.25   28.30
   6  15  -3  423.16   28.10
   5 -15  -3   45.20   10.30
  -5 -15   3   49.60   17.40
  -5 -15   3   34.80    8.80
   5  15  -3   44.90   11.20
   4 -15  -3  157.28    7.40
  -4 -15   3  179.18   16.40
   4 -15  -3  154.98    8.40
  -4 -15   3  131.69   24.30
  -4  15   3  154.98   18.00
   4  15  -3  159.48   19.30
   3 -15  -3  137.09    8.60
  -3 -15   3  135.59   23.00
  -3 -15   3  111.29   14.80
   3 -15  -3  162.38   11.30
  -3  15   3  144.59   18.30
   3  15  -3  166.18   19.60
   2 -15  -3  331.27   15.80
  -2 -15   3  346.47   29.70
  -2 -15   3  293.67   19.50
   2 -15  -3  336.37   19.60
   2  15  -3  305.17   20.20
  -2  15   3  335.47   22.10
  -1 -15   3   15.70    5.60
   1 -15  -3   10.50    5.30
   1 -15  -3   18.00    5.00
  -1 -15   3   14.50    7.80
   1  15  -3   19.50    6.50
  -1  15   3   12.90    5.80
   0 -15   3  646.44   37.60
   0 -15   3  636.84   27.70
   0 -15  -3  643.94   34.30
   0 -15  -3  629.54   27.50
   0  15  -3  676.63   29.30
   0  15   3  654.23   32.80
   1 -15   3   24.70    8.60
  -1 -15  -3   26.40    6.80
  -1 -15  -3   27.00    9.20
   1 -15   3   28.20    6.60
  -1  15  -3   20.70    6.10
   1  15   3   22.40    7.80
  -2 -15  -3   29.70    8.00
  -2 -15  -3   32.80   10.50
   2 -15   3   26.10    5.70
   2 -15   3   28.40    8.80
   2  15   3   31.20    9.60
  -2  15  -3   26.70    6.40
   3 -15   3  131.89   16.30
   3 -15   3  110.89    9.10
  -3 -15  -3   91.99   17.90
  -3 -15  -3   95.19   14.40
   3  15   3  109.19   16.60
  -3  15  -3   95.39   12.90
   4 -15   3  169.58   10.70
  -4 -15  -3  175.88   16.50
   4 -15   3  183.88   13.70
  -4 -15  -3  165.18   25.50
   4 -15   3  167.28   13.80
   4  15   3  166.38   21.10
  -5 -15  -3   40.70   10.30
   5 -15   3   39.40    5.70
   5 -15   3   37.90    6.60
  -5 -15  -3   37.00   14.10
   5 -15   3   37.80    8.30
   5  15   3   33.00   10.70
   6 -15   3  565.14   27.70
  -6 -15  -3  570.14   37.20
   6  15   3  592.04   35.50
   7 -15   3    3.40    3.00
  -7 -15  -3   19.40   11.90
   7  15   3    9.50    6.10
   8 -15   3   36.80    8.70
  -8 -15  -3   40.90   14.20
   8  15   3   36.20   12.50
   9 -15   3   61.79   11.60
  -9 -15  -3   62.99   21.30
   9  15   3   64.89   16.20
 -10 -15  -3   52.09   19.00
  10 -15   3   30.70    8.80
 -10 -16   3   43.40   18.40
  10 -16  -3   90.49   16.60
  10  16  -3   88.09   20.50
   9 -16  -3   -1.80    1.70
  -9 -16   3    1.90    6.10
   9  16  -3    3.80    4.20
  -8 -16   3   48.20   18.70
   8 -16  -3   38.60   11.00
   8  16  -3   61.49   15.40
  -7 -16   3  101.79   21.60
   7 -16  -3  132.69   19.10
   7  16  -3  161.18   21.20
  -6 -16   3    1.60    3.40
  -6 -16   3   -0.20    6.60
   6  16  -3    6.10    5.00
  -5 -16   3  206.18   32.90
  -5 -16   3  186.18   18.20
   5 -16  -3  214.18   19.40
   5  16  -3  196.58   23.10
  -4 -16   3  256.57   20.40
   4 -16  -3  240.68   11.00
   4 -16  -3  235.18    9.70
  -4 -16   3  218.08   30.80
   4  16  -3  231.18   19.30
  -4  16   3  263.97   20.20
  -3 -16   3    2.30    3.00
  -3 -16   3   -0.60    3.00
   3 -16  -3   -0.40    1.20
   3 -16  -3    0.00    2.00
   3  16  -3    0.10    2.20
  -3  16   3    3.70    3.00
   2 -16  -3  101.69    8.70
   2 -16  -3  103.79   13.90
  -2 -16   3  116.09   15.50
  -2  16   3  115.79   15.80
   2  16  -3   91.59   13.70
   1 -16  -3  195.88   13.20
  -1 -16   3  183.58   14.80
   1 -16  -3  171.48   16.90
  -1  16   3  171.28   20.10
   1  16  -3  189.48   15.30
   0 -16  -3   18.80    5.50
   0 -16   3   10.80    4.40
   0 -16   3    2.50    6.10
   0 -16  -3    7.00    6.70
   0  16   3    6.80    4.90
   0  16  -3   15.10    5.50
   1 -16   3  319.87   31.10
   1 -16   3  277.37   16.80
  -1 -16  -3  300.97   19.30
   1  16   3  274.07   21.30
  -1  16  -3  303.57   18.60
  -2 -16  -3  190.98   16.20
  -2 -16  -3  160.08   27.20
  -2  16  -3  205.78   15.00
   2  16   3  200.88   18.40
  -3 -16  -3   34.10    8.80
   3 -16   3   30.60    6.10
  -3 -16  -3   31.70   12.10
  -3  16  -3   37.70    8.10
   3  16   3    7.90    5.90
   4 -16   3   95.39   13.30
   4 -16   3   93.49   12.10
   4 -16   3   82.89    7.40
  -4 -16  -3   83.59   14.80
  -4 -16  -3   56.89   15.60
   4  16   3   63.29   12.80
   5 -16   3  248.98   17.50
  -5 -16  -3  244.98   35.10
  -5 -16  -3  265.67   22.00
   5 -16   3  250.27   13.40
   5 -16   3  248.08   11.80
   5  16   3  262.07   22.90
  -6 -16  -3    7.80    7.10
   6 -16   3    7.40    4.00
   6  16   3    9.50    6.50
   7 -16   3  245.38   18.20
  -7 -16  -3  307.57   44.00
   7  16   3  258.77   29.50
   8 -16   3   74.29   12.90
  -8 -16  -3   78.59   22.20
   8  16   3   72.99   16.00
   9 -16   3   14.40    6.00
  -9 -16  -3   16.40   11.70
   9  16   3    9.40    5.80
  -9 -17   3  435.86   56.09
   9 -17  -3  349.17   27.50
   9  17  -3  315.07   27.90
  -8 -17   3    9.80    8.60
   8 -17  -3    4.90    4.50
   8  17  -3   13.10    6.90
  -7 -17   3   43.40   17.70
   7 -17  -3   47.40   11.80
   7  17  -3   58.09   13.60
  -6 -17   3   20.40   12.20
   6 -17  -3   15.50    7.80
   6  17  -3   12.00    6.30
  -5 -17   3   75.99   16.20
  -5 -17   3  122.39   26.00
   5 -17  -3  102.69   16.80
   5  17  -3  123.69   19.50
  -4 -17   3    9.90    4.80
  -4 -17   3    1.30    6.40
   4 -17  -3   11.90    2.40
   4 -17  -3    6.70    2.40
   4  17  -3   13.20    6.60
  -4  17   3   18.70   11.30
  -3 -17   3  270.07   34.60
  -3 -17   3  384.16   32.10
   3 -17  -3  329.37   17.70
   3 -17  -3  332.97   14.90
  -3  17   3  304.67   22.50
   3  17  -3  353.96   23.50
  -2 -17   3   24.50   10.90
  -2 -17   3   26.10    7.80
   2 -17  -3   26.60    7.20
   2 -17  -3   29.40    6.00
   2  17  -3   25.80    8.30
  -2  17   3   25.80    8.10
   1 -17  -3   63.09   12.50
  -1 -17   3   57.59   10.80
  -1 -17   3   79.09   17.80
   1 -17  -3   53.19   10.20
   1  17  -3   49.00   10.20
  -1  17   3   49.60   10.40
   0 -17   3    7.70    6.10
   0 -17  -3   13.10    5.40
   0 -17   3    7.30    4.30
   0 -17  -3    6.80    5.10
   0  17  -3    7.60    4.10
   0  17   3   17.50    6.80
  -1 -17  -3  114.39   14.80
  -1 -17  -3   91.49   17.40
   1 -17   3   98.39   12.50
   1 -17   3   99.29   17.00
  -1  17  -3  102.29   13.90
  -2 -17  -3   -2.60    2.20
   2 -17   3    0.40    2.60
   2 -17   3    0.40    1.70
  -2 -17  -3   -0.90    1.70
   2  17   3   -0.50    3.50
  -2  17  -3   -2.40    1.60
  -3 -17  -3  351.16   31.00
  -3 -17  -3  359.36   25.50
   3 -17   3  384.86   18.50
   3 -17   3  385.26   23.40
  -3  17  -3  378.06   21.40
   3  17   3  329.27   25.30
  -4 -17  -3   -1.10    3.10
  -4 -17  -3    4.40    4.20
   4 -17   3    1.50    2.90
   4 -17   3    2.70    2.10
   4 -17   3    0.90    1.70
   4  17   3   -4.10    2.20
  -5 -17  -3   72.19   18.30
   5 -17   3  113.99   14.90
   5  17   3   80.39   15.90
   6 -17   3    5.20    4.00
  -6 -17  -3    2.00    4.60
   6  17   3   -0.20    3.20
   7 -17   3   67.39   11.90
  -7 -17  -3   76.99   21.70
   7  17   3   64.99   14.60
   8 -17   3    5.70    3.90
  -8 -17  -3   13.30   10.90
   8  17   3    3.70    5.30
   8 -18  -3   33.00   10.60
  -8 -18   3   65.49   21.50
   8  18  -3   27.50    9.80
  -7 -18   3  206.48   38.20
   7 -18  -3  116.09   18.20
   7  18  -3  157.88   22.60
  -6 -18   3    7.00    8.00
   6 -18  -3   -0.50    2.10
   6  18  -3    4.10    4.90
  -5 -18   3  160.58   31.70
   5 -18  -3  124.59   18.50
   5  18  -3  137.99   19.50
  -4 -18   3   45.50   15.80
   4  18  -3   36.90   11.00
  -4  18   3   28.50    9.10
  -3 -18   3   18.00    9.50
  -3 -18   3    9.10    5.20
   3 -18  -3   10.80    3.20
   3 -18  -3   12.30    4.20
  -3  18   3   14.80    6.90
   3  18  -3   16.70    7.90
  -2 -18   3   59.29   11.50
  -2 -18   3   93.09   21.70
   2 -18  -3   69.99    9.50
   2 -18  -3   69.99   11.80
   2  18  -3   60.89   11.60
  -2  18   3   95.19   16.40
  -1 -18   3  171.88   15.20
  -1 -18   3  181.08   28.70
   1 -18  -3  170.98   13.00
   1 -18  -3  163.98   16.40
   1  18  -3  173.08   15.60
  -1  18   3  159.98   20.20
   0 -18   3    8.10    6.80
   0 -18   3   -1.10    1.10
   0 -18  -3    0.20    2.90
   0 -18  -3    1.90    3.30
   0  18  -3    3.60    3.00
   0  18   3    5.80    4.90
  -1 -18  -3  247.38   23.50
  -1 -18  -3  233.88   17.90
   1 -18   3  253.27   16.80
   1 -18   3  254.07   23.00
   1  18   3  221.98   20.40
  -1  18  -3  254.57   18.20
  -2 -18  -3  102.49   15.30
   2 -18   3  105.99   17.40
  -2 -18  -3  151.88   24.50
   2 -18   3  119.29   10.80
   2  18   3  116.89   18.80
  -2  18  -3  129.79   15.40
   3 -18   3    1.40    1.80
  -3 -18  -3    3.20    5.60
  -3 -18  -3    7.10    4.90
   3 -18   3    4.40    3.70
  -3  18  -3   -0.20    3.10
   3  18   3    1.50    3.50
   4 -18   3   79.89    7.20
   4 -18   3   51.09    9.60
   4 -18   3   56.39    9.00
  -4 -18  -3   59.19   16.50
   4  18   3   87.79   17.30
  -5 -18  -3  250.07   34.40
   5 -18   3  238.08   18.10
   5  18   3  218.08   25.90
  -6 -18  -3   -0.30    3.00
   6 -18   3    1.00    2.80
   6  18   3    8.20    5.60
   7 -18   3   99.69   14.50
  -7 -18  -3   95.89   22.80
   7  18   3  103.79   19.90
  -7 -19   3    0.50    4.20
   7 -19  -3    8.80    5.60
   7  19  -3    7.20    5.90
  -6 -19   3   77.59   21.20
   6 -19  -3   80.29   15.90
   6  19  -3   74.39   16.80
  -5 -19   3   19.10   11.60
   5 -19  -3   18.70    7.70
   5  19  -3   15.70    7.20
  -4 -19   3   26.60   11.80
  -4  19   3   20.70    7.70
   4  19  -3   36.00   10.40
  -3 -19   3   98.59   23.70
   3 -19  -3   83.59   10.90
   3 -19  -3   71.29    6.90
   3  19  -3  102.29   16.90
  -3  19   3  100.79   16.90
   2 -19  -3  123.89   10.50
  -2 -19   3  139.79   26.40
   2 -19  -3  153.98   14.30
  -2 -19   3  130.39   17.70
  -2  19   3  130.59   18.40
  -1 -19   3   16.50    6.20
   1 -19  -3   27.10    6.60
  -1 -19   3   18.80    9.40
   1 -19  -3   17.60    7.10
   1  19  -3    9.40    5.00
  -1  19   3   13.50    6.90
   0 -19  -3  179.18   15.10
   0 -19  -3  198.38   19.90
   0 -19   3  190.68   27.00
   0  19   3  174.98   21.90
   0  19  -3  176.58   15.80
   1 -19   3   33.80    7.70
   1 -19   3   43.20   12.70
  -1 -19  -3   33.80    8.30
  -1 -19  -3   28.90   10.20
   1  19   3   25.70    8.90
  -1  19  -3   42.20    9.50
   2 -19   3   75.69   14.50
   2 -19   3   66.19   10.20
  -2 -19  -3   46.30   13.30
  -2 -19  -3   41.20    9.50
  -2  19  -3   49.10   10.00
   2  19   3   65.39   14.30
  -3 -19  -3   49.20   14.40
   3 -19   3   54.89   10.80
   3 -19   3   51.19    8.20
   3  19   3   47.40   11.50
  -3  19  -3   51.19   10.20
   4 -19   3   19.20    4.20
   4 -19   3   28.90    8.40
   4 -19   3   33.80    6.50
  -4 -19  -3   31.00   12.10
   4  19   3   22.70    9.00
  -5 -19  -3   11.40    9.10
   5 -19   3    9.70    5.10
   5  19   3    9.00    6.20
  -6 -19  -3  151.08   30.50
   6 -19   3  131.99   17.00
   6  19   3   90.79   20.80
   5 -20  -3    2.00    3.50
  -5 -20   3   16.10   12.30
   5  20  -3   14.10    6.90
  -4 -20   3  203.98   52.19
   4  20  -3  179.58   23.50
  -4  20   3  177.88   22.30
   3 -20  -3    0.80    2.10
   3 -20  -3    3.70    1.90
  -3 -20   3    6.00    5.70
  -3  20   3    3.20    4.50
   3  20  -3    4.70    3.80
  -2 -20   3  231.58   33.90
   2 -20  -3  232.98   14.80
   2 -20  -3  255.17   18.60
  -2  20   3  285.57   23.30
   2  20  -3  247.58   20.40
  -1 -20   3    1.10    3.40
   1 -20  -3    2.60    2.80
   1 -20  -3    4.00    4.10
  -1 -20   3    1.40    2.70
  -1  20   3   -1.40    2.10
   1  20  -3   -0.20    2.10
   0 -20  -3   28.90    7.90
   0 -20   3   30.50    7.70
   0 -20  -3   24.90    9.20
   0 -20   3   14.90    7.80
   0  20   3   26.20    9.40
   1 -20   3    5.70    3.90
  -1 -20  -3    3.60    4.80
   1 -20   3    4.80    4.70
  -1 -20  -3    1.10    3.60
   1  20   3   -0.80    2.40
  -1  20  -3    4.60    3.70
  -2 -20  -3  118.19   22.10
   2 -20   3  127.69   18.60
   2 -20   3  121.09   11.40
   2  20   3  143.79   20.20
  -2  20  -3  112.29   14.80
  -3 -20  -3   -0.40    4.30
   3 -20   3    2.30    2.90
   3  20   3    3.20    4.60
   4 -20   3  138.19    9.90
   4 -20   3  116.09    8.10
  -4 -20  -3  113.79   32.70
   4 -20   3   93.59   14.70
   4  20   3  121.19   20.80
   2 -21  -3   83.19   13.20
  -2 -21   3   67.19   18.50
   2 -21  -3  105.19   15.20
  -2  21   3   62.99   14.90
   2  21  -3   95.79   15.90
   1 -21  -3    4.70    4.50
   1 -21  -3    2.30    2.70
  -1 -21   3   -1.10    2.60
   1  21  -3    1.80    3.10
  -1  21   3    8.60    5.00
   0 -21  -3  188.98   24.10
   0 -21  -3  133.29   18.90
   0 -21   3  156.58   24.20
   0  21  -3  125.79   17.00
   0  21   3  141.59   20.80
   1 -21   3   73.49   16.10
   1 -21   3   30.60    7.70
  -1 -21  -3   40.80   12.20
  -1  21  -3   48.70   10.60
   1  21   3   25.20    8.20
   2 -21   3   28.80    9.10
  -2 -21  -3   14.30    8.10
   2  21   3   20.20    8.00
  -2  21  -3   15.10    6.60
  15   0  -4    3.50    6.20
  14   0  -4   28.20   11.80
 -13   0   4   -0.10    2.90
  13   0  -4    0.30    3.90
  12   0  -4  609.94   37.40
  12   0  -4  592.34   33.70
 -11   0   4    2.70    3.80
  11   0  -4    2.20    4.00
  11   0  -4    0.60    3.00
  10   0  -4  652.93   35.00
  10   0  -4  572.24   39.60
 -10   0   4  652.83   39.50
  10   0  -4  584.04   30.30
   9   0  -4    3.10    4.20
  -9   0   4   -0.80    1.40
   9   0  -4   -0.90    2.20
   9   0  -4   -0.20    3.00
   8   0  -4    6.80    3.50
   8   0  -4    6.30    4.30
   8   0  -4    4.90    3.70
  -7   0   4   -0.10    1.20
   7   0  -4   -1.00    1.10
  -7   0   4    0.30    1.30
  -6   0   4  922.21   32.40
   6   0  -4  937.51   33.50
   6   0  -4 1006.50   36.50
   5   0  -4   -0.20    1.10
  -5   0   4   -1.70    1.00
   5   0  -4   -1.20    0.70
  -5   0   4    1.10    1.60
  -5   0   4    1.00    1.40
   4   0  -4 6131.99  152.58
  -4   0   4 5899.71  150.68
   3   0  -4    1.90    1.60
   3   0  -4    1.50    1.30
  -3   0   4    3.60    1.90
  -3   0   4    4.20    2.00
   2   0  -4   11.10    2.70
  -2   0   4   14.00    3.80
   2   0  -4   13.10    3.00
  -1   0   4   -0.20    0.90
   1   0  -4    2.60    1.30
   0   0   4 3039.80   72.59
   0   0  -4 2994.60   72.59
   1   0   4    0.00    1.40
  -1   0  -4    0.50    1.60
  -1   0  -4    0.60    0.80
   1   0   4    1.00    0.90
   2   0   4 7874.51  183.58
  -2   0  -4 7921.51  183.98
  -3   0  -4   -0.80    0.70
   3   0   4    0.00    0.70
  -3   0  -4    1.70    2.00
   3   0   4    1.80    2.10
   4   0   4  249.88   17.30
   4   0   4  289.87   13.60
  -4   0  -4  267.87   13.10
  -4   0  -4  290.67   17.20
   5   0   4    2.60    2.00
   5   0   4   -0.90    1.30
  -5   0  -4   -1.10    0.60
  -5   0  -4   -1.40    0.80
  -6   0  -4   79.59   10.60
   6   0   4   51.89    8.70
  -6   0  -4   52.69   11.30
   6   0   4   70.19   14.00
  -7   0  -4   -0.50    0.70
   7   0   4    0.60    1.60
  -7   0  -4    2.10    2.70
   7   0   4    1.40    1.80
  -7   0  -4    1.30    2.00
   8   0   4 1191.28   55.39
   8   0   4 1184.78   43.60
  -8   0  -4 1089.79   45.20
   9   0   4    0.60    2.80
   9   0   4    2.80    3.50
  10   0   4  487.45   37.00
  10   0   4  489.35   28.00
 -10   0  -4  363.16   28.30
  11   0   4   -1.80    1.90
  11   0   4    0.60    3.10
 -11   0  -4    0.20    1.40
  12   0   4   99.69   17.00
  12   0   4  131.89   30.00
  13   0   4    1.70    3.50
  14   0   4  465.65   33.30
  15  -1  -4   55.69   22.00
  14  -1  -4  142.39   23.50
  14   1  -4  134.59   21.80
 -13  -1   4    1.80    3.10
  13  -1  -4    1.80    4.70
 -13   1   4    3.20    4.20
  13   1  -4   17.80    9.10
  12  -1  -4  372.66   28.30
  12  -1  -4  310.27   23.60
  12   1  -4  320.17   24.40
  12   1  -4  322.27   26.50
  11  -1  -4  248.38   19.60
  11  -1  -4  253.87   22.30
  11   1  -4  238.58   20.00
  11   1  -4  262.37   22.70
 -11   1   4  314.87   26.40
  10  -1  -4   81.59   15.50
  10  -1  -4   45.90   12.30
  10  -1  -4   74.69   13.10
 -10   1   4   70.39   14.60
  10   1  -4   64.29   11.20
  10   1  -4   74.69   17.70
  10   1  -4   58.79   13.30
   9  -1  -4  268.87   20.50
  -9  -1   4  313.47   26.50
   9  -1  -4  287.27   18.80
   9  -1  -4  249.58   23.70
  -9   1   4  277.37   23.10
   9   1  -4  272.67   25.70
   9   1  -4  324.47   20.70
   9   1  -4  265.57   20.70
   8  -1  -4  431.36   22.00
  -8  -1   4  411.36   29.50
   8  -1  -4  421.56   29.00
   8  -1  -4  420.76   24.50
   8   1  -4  433.56   25.10
   8   1  -4  428.46   30.60
  -8   1   4  402.76   27.00
  -7  -1   4   33.50    9.70
  -7  -1   4   29.00    6.80
   7  -1  -4   41.80    7.40
  -7  -1   4   34.40    7.00
  -7   1   4   30.80    6.10
   7   1  -4   44.40    8.70
  -7   1   4   29.80    6.70
  -7   1   4   43.10   11.00
  -6  -1   4  969.70   44.00
  -6  -1   4 1042.50   35.10
   6  -1  -4 1052.69   34.70
   6  -1  -4  968.80   36.70
  -6   1   4  977.00   35.20
   6   1  -4 1084.49   38.40
  -6   1   4 1045.50   42.40
   6   1  -4  970.70   35.50
   5  -1  -4  363.26   18.40
   5  -1  -4  362.26   16.60
  -5  -1   4  336.27   22.60
  -5  -1   4  366.66   17.10
  -5  -1   4  361.46   17.50
   5   1  -4  342.37   17.10
  -5   1   4  415.36   16.90
   5   1  -4  380.56   18.80
  -5   1   4  336.07   20.70
  -5   1   4  356.96   17.50
  -4  -1   4  934.31   29.90
   4  -1  -4  864.01   30.30
   4  -1  -4  915.21   28.80
  -4  -1   4  894.31   29.70
  -4  -1   4  869.81   37.00
   4   1  -4  943.51   30.40
  -4   1   4  907.11   28.50
   4   1  -4  870.71   30.30
  -4   1   4  853.11   34.50
  -4   1   4  901.51   30.00
   3  -1  -4   25.30    4.90
  -3  -1   4   21.50    4.00
  -3  -1   4   24.40    4.60
   3  -1  -4   27.20    4.50
  -3   1   4   22.10    3.80
   3   1  -4   18.90    3.70
  -3   1   4   31.40    5.20
   3   1  -4   23.10    4.60
   2  -1  -4 2406.96   64.09
  -2  -1   4 2315.27   62.19
   2  -1  -4 2320.17   62.59
   2   1  -4 2337.87   62.59
  -1  -1   4   26.90    3.40
   1  -1  -4   27.90    4.60
   1  -1  -4   25.50    3.50
  -1  -1   4   42.40    6.70
   1   1  -4   28.90    4.20
  -1   1   4   33.20    5.20
   1   1  -4   28.10    3.40
  -1   1   4   29.30    3.80
   0  -1   4  179.48    9.70
   0  -1  -4  169.18    7.60
   0  -1   4  173.28    6.10
   0  -1  -4  178.08   11.10
   0   1   4  165.18    7.50
   0   1  -4  182.18    9.30
   0   1   4  160.78    9.70
   0   1  -4  172.88    6.00
  -1  -1  -4    5.90    2.70
   1  -1   4    8.80    1.50
   1  -1   4    6.50    2.40
  -1  -1  -4    8.20    2.30
  -1   1  -4    2.90    1.80
  -1   1  -4    5.10    1.20
   1   1   4    6.50    2.10
   1   1   4    7.10    2.80
  -2  -1  -4   10.50    3.60
  -2  -1  -4   12.70    3.30
   2  -1   4    8.60    1.90
   2  -1   4   10.60    3.50
  -2   1  -4   11.30    2.20
   2   1   4   15.00    3.20
  -2   1  -4   11.80    3.60
   2   1   4    7.90    3.00
   3  -1   4  683.03   21.20
  -3  -1  -4  680.63   22.90
   3  -1   4  684.13   27.40
  -3  -1  -4  685.93   28.20
   3   1   4  677.33   22.80
   3   1   4  676.53   29.00
  -3   1  -4  664.93   21.00
   4  -1   4  887.41   34.90
   4  -1   4  837.22   27.50
  -4  -1  -4  896.71   29.40
  -4  -1  -4  889.51   35.40
   4   1   4  863.61   36.60
   4   1   4  916.11   29.60
  -4   1  -4  867.21   27.60
   5  -1   4   32.30    5.90
   5  -1   4   36.30    8.70
  -5  -1  -4   33.80    7.90
  -5  -1  -4   29.80    5.70
  -5   1  -4   34.20    6.10
   5   1   4   28.80    5.80
   5   1   4   27.70    8.30
  -6  -1  -4  925.41   39.80
   6  -1   4  936.01   32.50
  -6  -1  -4  842.12   32.50
  -6  -1  -4  862.21   32.50
   6  -1   4  863.31   39.90
  -6   1  -4  922.11   31.60
   6   1   4  858.71   32.90
   6   1   4  874.31   42.20
  -6   1  -4  853.91   31.00
  -7  -1  -4   68.89   10.60
  -7  -1  -4   58.99    9.00
  -7  -1  -4   51.79   10.90
   7  -1   4   58.69   13.00
   7  -1   4   83.49   11.80
  -7   1  -4   65.99   12.30
   7   1   4   89.29   12.80
   7   1   4   67.79   15.70
   8  -1   4   22.10    8.40
  -8  -1  -4   42.80   11.60
   8   1   4   39.80    9.00
   8   1   4   47.30   13.90
  -8   1  -4   33.30    8.00
  -8   1  -4   35.60    9.00
  -9  -1  -4  208.88   20.40
   9  -1   4  160.38   22.80
   9  -1   4  223.78   17.20
  -9   1  -4  228.88   19.50
   9   1   4  208.98   17.30
  10  -1   4  641.04   32.90
 -10  -1  -4  635.54   38.80
  10  -1   4  648.44   43.10
 -10   1  -4  712.53   37.70
  10   1   4  689.23   34.90
  10   1   4  641.94   44.60
  11  -1   4   11.90    7.50
  11  -1   4   20.60    7.30
  11   1   4   17.60    9.10
  11   1   4   32.80    9.90
  12  -1   4  325.87   24.90
  12  -1   4  295.77   40.70
  12   1   4  382.26   48.60
  13  -1   4  114.09   18.70
  13   1   4  148.69   22.10
  14  -1   4    2.20    3.40
  14   1   4    4.20    5.80
  15  -2  -4   31.10   13.60
  15   2  -4   22.30   14.20
  14  -2  -4   13.30    8.00
  14   2  -4    6.40    6.10
  13  -2  -4  488.35   34.30
  13   2  -4  444.86   33.40
  12  -2  -4   30.70   12.60
  12  -2  -4   17.80    8.60
  12   2  -4   19.60    7.80
  12   2  -4   10.00    6.50
 -11  -2   4    7.10    5.70
  11  -2  -4   20.30    7.20
  11  -2  -4   28.50    9.10
  11   2  -4   34.80   10.00
 -11   2   4   30.40   10.00
  11   2  -4   12.60    6.40
 -10  -2   4  162.38   25.20
  10  -2  -4  125.89   17.80
  10  -2  -4  170.38   14.80
 -10   2   4  152.88   21.10
  10   2  -4  150.48   15.10
  10   2  -4  155.58   21.90
  10   2  -4  152.78   26.50
   9  -2  -4  380.26   24.50
   9  -2  -4  364.86   20.80
  -9  -2   4  307.67   27.60
   9   2  -4  365.96   24.40
   9   2  -4  352.26   30.00
  -9   2   4  370.76   25.70
   9   2  -4  366.96   22.80
   8  -2  -4   75.19   10.30
   8  -2  -4   61.99   11.50
  -8  -2   4   58.19   13.90
   8   2  -4   88.19   13.50
  -8   2   4   72.69   13.30
   8   2  -4   80.19   13.10
   7  -2  -4  617.54   35.50
   7  -2  -4  616.14   35.10
  -7  -2   4  597.14   26.40
  -7  -2   4  571.24   26.80
  -7  -2   4  581.44   35.10
  -7   2   4  593.44   23.50
   7   2  -4  564.84   32.10
   7   2  -4  629.84   27.60
  -7   2   4  622.04   31.00
  -6  -2   4  105.29    9.40
   6  -2  -4   91.79   12.00
  -6  -2   4   86.09   14.20
   6  -2  -4   89.39    8.00
  -6  -2   4   85.39   11.60
  -6   2   4  114.89   13.00
   6   2  -4   95.59    9.40
  -6   2   4  104.79   14.50
  -6   2   4   90.99    7.70
   6   2  -4   76.99   10.20
  -5  -2   4  305.77   15.90
   5  -2  -4  311.67   16.90
  -5  -2   4  322.37   22.60
  -5  -2   4  309.67   16.20
   5  -2  -4  309.57   14.70
  -5   2   4  308.77   18.50
  -5   2   4  296.17   15.90
   5   2  -4  315.67   17.20
   5   2  -4  313.17   16.40
  -5   2   4  311.57   14.20
  -4  -2   4  804.92   28.20
  -4  -2   4  804.32   36.70
   4  -2  -4  840.62   26.80
  -4  -2   4  819.42   28.50
   4  -2  -4  821.82   29.10
   4   2  -4  839.42   29.20
  -4   2   4  872.11   32.40
   4   2  -4  864.31   29.70
  -4   2   4  819.12   28.80
  -4   2   4  856.41   26.80
  -3  -2   4   88.79    8.10
  -3  -2   4   87.39    6.70
   3  -2  -4   89.09    7.20
   3  -2  -4   99.39    6.70
   3   2  -4   82.99    6.80
  -3   2   4   92.19    6.50
   3   2  -4   87.09    7.20
   2  -2  -4   61.99    7.00
   2  -2  -4   37.30    5.20
  -2  -2   4   44.80    5.20
   2  -2  -4   54.79    6.90
  -2  -2   4   39.90    5.60
   2   2  -4   46.60    6.20
   2   2  -4   39.90    5.00
  -2   2   4   47.00    6.10
  -2   2   4   34.90    4.70
   1  -2  -4 1604.24   46.20
  -1  -2   4 1598.24   42.30
  -1   2   4 1651.53   46.40
   1   2  -4 1661.33   43.10
   0  -2   4   35.30    5.10
   0  -2  -4   28.80    4.50
   0   2   4   40.80    7.00
   0   2  -4   32.30    1.90
   0   2   4   36.70    4.70
   0   2  -4   26.80    4.10
   0   2  -4   30.80    2.00
  -1  -2  -4 2683.33   74.79
   1  -2   4 2720.73   61.49
   1   2   4 2790.82   71.39
   2  -2   4  981.50   32.30
  -2  -2  -4 1078.69   36.10
  -2  -2  -4  976.80   30.00
   2   2   4 1046.50   30.30
   2   2   4  953.40   35.50
  -3  -2  -4 1842.92   56.89
  -3  -2  -4 1824.32   50.19
   3   2   4 1741.73   57.59
  -4  -2  -4   10.80    4.90
   4  -2   4   16.10    5.00
   4  -2   4   15.80    3.60
  -4  -2  -4    9.50    3.60
  -4   2  -4   18.60    4.50
  -4   2  -4   18.20    3.80
   4   2   4   25.00    7.90
   4   2   4    9.30    3.10
  -5  -2  -4  942.41   40.40
  -5  -2  -4  972.40   34.20
   5  -2   4  983.50   39.20
   5  -2   4  996.90   31.90
  -5   2  -4  944.11   35.30
   5   2   4 1026.30   34.80
  -5   2  -4  992.20   31.30
   6  -2   4   33.40    6.70
  -6  -2  -4   19.60    5.40
  -6  -2  -4   17.60    6.60
   6  -2   4   25.20    7.60
  -6  -2  -4   27.80    7.40
  -6   2  -4   22.40    6.50
   6   2   4   19.80    5.30
  -6   2  -4   24.20    5.50
   6   2   4   19.20    7.80
  -6   2  -4   13.90    4.00
   7  -2   4  663.23   27.60
  -7  -2  -4  617.54   28.20
  -7  -2  -4  639.04   28.80
   7  -2   4  669.03   35.60
   7   2   4  644.44   38.40
   7   2   4  651.13   29.60
  -7   2  -4  675.93   30.80
  -7   2  -4  668.33   27.00
   8  -2   4  813.32   42.60
   8  -2   4  765.12   33.00
  -8  -2  -4  938.01   65.29
  -8   2  -4  792.82   36.00
   8   2   4  786.42   45.60
   8   2   4  788.12   34.90
  -8   2  -4  783.62   32.00
   9  -2   4  233.28   23.30
  -9  -2  -4  241.58   22.80
   9  -2   4  251.67   18.10
   9   2   4  254.67   19.40
  -9   2  -4  247.08   19.50
   9   2   4  300.67   37.70
  10  -2   4    4.30    5.50
  10  -2   4    4.80    4.30
 -10  -2  -4    3.40    3.90
 -10   2  -4    2.60    2.80
  10   2   4    0.90    3.50
  10   2   4    2.70    3.30
  11  -2   4  300.77   29.90
  11  -2   4  309.67   22.80
  11   2   4  344.67   25.10
  11   2   4  356.86   44.30
  12  -2   4   11.00    5.70
  12  -2   4    7.20    6.10
 -12  -2  -4   -0.10    1.90
  12   2   4   45.80   12.20
 -12   2  -4    0.30    1.80
  12   2   4   39.00   17.40
  13  -2   4   42.00   11.50
  13   2   4   54.29   14.10
  14  -2   4   23.90    9.30
  14   2   4   55.19   14.90
  15   3  -4   58.79   15.80
  14  -3  -4    6.30    6.80
  14   3  -4    5.70    5.10
  13  -3  -4   33.00   10.30
  13   3  -4   13.50    6.90
  12  -3  -4   13.90    7.30
  12  -3  -4    4.60    3.90
 -12  -3   4    0.30    2.10
 -12   3   4   -0.10    1.80
  12   3  -4    2.60    4.10
  12   3  -4   -0.30    3.60
  11  -3  -4  698.33   33.00
 -11  -3   4  646.54   50.89
  11  -3  -4  624.94   36.30
  11   3  -4  629.04   37.00
  11   3  -4  692.83   36.20
 -11   3   4  647.64   35.50
  10  -3  -4  154.08   19.50
 -10  -3   4  158.98   31.20
  10  -3  -4  157.18   13.90
  10   3  -4  164.88   22.50
  10   3  -4  160.98   15.90
 -10   3   4  157.48   16.00
  -9  -3   4  873.41   49.30
   9  -3  -4  847.52   34.00
   9  -3  -4  900.91   39.80
  -9   3   4  826.72   38.40
   9   3  -4  887.61   40.40
   9   3  -4  845.72   37.80
   9   3  -4  727.33   46.10
  -8  -3   4    4.80    3.60
   8  -3  -4   11.40    4.20
   8  -3  -4   12.70    5.50
  -8  -3   4    8.20    5.70
   8   3  -4    4.60    4.00
   8   3  -4   16.20    8.80
  -8   3   4    5.40    3.60
   8   3  -4   11.70    5.10
  -7  -3   4   51.09    9.80
   7  -3  -4   69.89   11.80
   7  -3  -4   71.69    9.80
  -7  -3   4   60.39   13.30
  -7   3   4   46.30    8.50
   7   3  -4   50.99    9.20
  -7   3   4   48.00   10.80
   7   3  -4   50.39    8.20
  -6  -3   4   16.00    5.30
  -6  -3   4   17.00    5.30
   6  -3  -4   14.20    5.40
  -6  -3   4    5.40    4.10
   6  -3  -4   14.50    4.20
   6   3  -4    9.60    4.50
   6   3  -4   11.40    4.50
  -6   3   4    7.90    4.10
  -6   3   4    8.20    3.00
  -6   3   4    7.30    3.30
  -5  -3   4 1647.74   49.50
  -5  -3   4 1664.23   49.70
  -5  -3   4 1662.73   61.79
   5  -3  -4 1589.84   49.90
  -5   3   4 1588.34   49.30
  -5   3   4 1600.14   44.80
   5   3  -4 1563.94   49.70
  -5   3   4 1660.43   51.09
   5   3  -4 1605.64   50.39
  -4  -3   4  130.19   18.00
   4  -3  -4  109.49    9.00
  -4  -3   4  111.49    8.60
  -4  -3   4  129.39    9.60
   4  -3  -4  124.89    7.80
   4  -3  -4  115.99    8.80
   4   3  -4  123.79    9.50
   4   3  -4  114.79    9.10
  -4   3   4  115.79    7.40
  -4   3   4  124.79    9.80
   3  -3  -4 2645.04   74.49
   3  -3  -4 2650.93   73.09
  -3  -3   4 2547.05   71.49
   3   3  -4 2523.55   72.49
   2  -3  -4  480.05   17.80
   2  -3  -4  472.65   17.00
  -2   3   4  464.85   17.10
   2   3  -4  449.86   16.50
   2   3  -4  459.75   18.10
  -2   3   4  478.85   17.80
  -1  -3   4   64.79    4.20
  -1  -3   4   62.29    5.50
   1  -3  -4   54.49    5.20
  -1   3   4   71.99    5.60
   1   3  -4   62.09    5.40
  -1   3   4   58.49    5.60
   1   3  -4   63.19    4.30
   0  -3  -4   82.59    6.10
   0  -3   4   88.19    6.40
   0  -3  -4   78.99    6.90
   0  -3   4   78.49    3.30
   0   3  -4   73.59    3.30
   0   3   4   84.69    6.10
   0   3   4   82.99    7.20
  -1  -3  -4 2453.55   68.29
   1   3   4 2517.75   67.99
  -2  -3  -4    1.40    1.50
  -2  -3  -4    3.10    2.30
   2  -3   4    1.10    0.70
   2  -3   4    4.40    2.30
   2   3   4    2.90    2.40
  -2   3  -4    3.20    0.90
  -2   3  -4    2.20    1.50
   2   3   4    1.30    1.50
  -3  -3  -4 2170.58   66.29
   3   3   4 2137.09   67.69
  -4  -3  -4   35.10    6.40
  -4  -3  -4   56.09   10.90
   4  -3   4   24.30    6.20
   4  -3   4   27.50    4.60
   4   3   4   30.80    5.80
  -4   3  -4   27.50    4.30
  -4   3  -4   33.10    5.70
   4   3   4   25.00    7.20
   5  -3   4    4.90    2.60
  -5  -3  -4    4.90    4.10
   5  -3   4    5.20    3.30
  -5  -3  -4    3.90    2.60
  -5   3  -4    8.10    3.40
  -5   3  -4    8.20    3.00
   5   3   4    0.60    2.30
   5   3   4    7.50    3.30
  -6  -3  -4    5.70    2.70
   6  -3   4    5.90    4.00
   6  -3   4    5.80    2.80
  -6  -3  -4    3.00    2.60
  -6  -3  -4    5.20    4.20
   6   3   4    0.50    2.50
  -6   3  -4    5.70    2.50
   6   3   4    3.40    2.60
  -6   3  -4    6.10    3.10
  -6   3  -4    7.60    2.90
  -7  -3  -4  974.30   38.70
  -7  -3  -4 1048.00   48.10
   7  -3   4 1050.59   37.00
   7  -3   4 1083.49   46.30
  -7  -3  -4  988.70   42.50
  -7   3  -4 1068.49   39.40
   7   3   4 1091.19   40.80
   7   3   4  969.10   50.29
  -7   3  -4 1025.60   35.70
   8  -3   4  121.09   14.70
   8  -3   4  113.89   19.30
  -8  -3  -4  112.79   18.80
   8   3   4   95.19   19.60
  -8   3  -4  119.79   13.30
   8   3   4  131.99   17.80
  -8   3  -4  139.99   21.90
   9  -3   4 1043.20   40.60
  -9  -3  -4 1069.19   51.99
   9  -3   4  976.60   49.90
   9   3   4  991.00   42.80
   9   3   4  876.01   52.89
  -9   3  -4  985.00   41.30
 -10  -3  -4   83.99   18.30
  10  -3   4   77.49   12.70
  10  -3   4   95.99   20.10
  10   3   4   63.09   16.30
 -10   3  -4   78.69   13.20
  10   3   4   73.69   13.80
  11  -3   4    9.80    7.00
  11  -3   4    7.90    5.40
 -11  -3  -4   -0.30    1.70
  11   3   4    5.30    4.70
  11   3   4    5.70    5.70
 -11   3  -4   -0.10    1.30
  12  -3   4    6.70    7.50
  12  -3   4    4.80    4.40
  12   3   4    4.10    4.20
  12   3   4   -0.30    3.20
 -12   3  -4    0.70    1.90
  13  -3   4  250.27   22.40
  13   3   4  295.97   25.70
  14  -3   4    1.80    4.20
  14   3   4    3.00    4.90
  15  -4  -4   36.30   18.00
  15   4  -4   42.70   12.80
  14  -4  -4   14.20    8.40
  14   4  -4    5.70    5.50
  13  -4  -4  240.38   31.00
  13   4  -4  244.08   31.50
  12  -4  -4  255.77   29.80
  12  -4  -4  260.67   20.10
  12   4  -4  175.78   22.60
 -12   4   4  253.97   20.20
  12   4  -4  271.07   23.40
  11  -4  -4   29.20    9.50
 -11  -4   4   51.49   16.30
  11  -4  -4   43.60    9.20
 -11   4   4   45.00   11.00
  11   4  -4   34.90    9.70
  11   4  -4   28.00    9.20
 -10  -4   4  236.28   33.20
  10  -4  -4  248.88   17.40
  10  -4  -4  232.68   20.10
  10   4  -4  224.88   19.30
  10   4  -4  234.28   20.90
 -10   4   4  223.78   17.70
  -9  -4   4  459.25   35.90
   9  -4  -4  504.35   28.70
   9  -4  -4  492.45   23.80
   9   4  -4  511.75   29.70
   9   4  -4  454.25   26.90
  -9   4   4  530.75   26.80
   8  -4  -4   88.19   10.80
  -8  -4   4   86.19   13.30
   8  -4  -4   80.79   12.20
  -8  -4   4  100.79   19.80
   8   4  -4   64.79   10.20
   8   4  -4   80.79   13.50
  -8   4   4   82.69   12.10
   7  -4  -4  969.00   32.80
  -7  -4   4  886.01   36.20
  -7  -4   4  982.10   49.60
   7  -4  -4  918.71   37.70
   7   4  -4 1024.00   40.00
  -7   4   4  894.31   34.90
  -6  -4   4  147.09   11.90
   6  -4  -4  123.09   10.70
   6  -4  -4  146.59    9.60
  -6  -4   4  131.49   11.20
  -6  -4   4  116.79   17.40
   6  -4  -4  141.69   12.10
   6   4  -4  132.49   12.10
   6   4  -4  143.49   11.90
  -6   4   4  148.49   11.20
  -6   4   4  139.69    8.50
   5  -4  -4  335.47   18.30
  -5  -4   4  360.26   25.70
   5  -4  -4  346.27   14.80
  -5  -4   4  356.06   18.30
  -5  -4   4  330.37   17.40
   5  -4  -4  349.27   17.60
   5   4  -4  346.97   18.70
   5   4  -4  362.96   18.70
  -5   4   4  378.16   17.30
  -5   4   4  338.47   14.00
   4  -4  -4  949.80   32.40
   4  -4  -4  946.71   28.70
  -4  -4   4 1037.90   44.20
  -4  -4   4  955.40   32.30
   4  -4  -4 1024.30   34.00
  -4  -4   4  935.41   32.90
   4   4  -4  957.20   33.40
  -4   4   4  936.11   28.10
   4   4  -4  956.10   33.20
  -4   4   4  992.10   31.80
   3  -4  -4   47.90    7.40
  -3  -4   4   50.89    7.00
   3  -4  -4   41.60    6.00
   3  -4  -4   54.19    4.80
  -3  -4   4   66.09    8.70
  -3   4   4   42.90    4.20
  -3   4   4   47.60    6.50
   3   4  -4   53.29    6.90
  -2  -4   4  540.45   18.60
   2  -4  -4  545.55   20.30
   2  -4  -4  529.45   18.70
  -2  -4   4  530.85   20.20
  -2   4   4  528.25   18.50
  -2   4   4  551.64   20.30
   2   4  -4  516.65   20.00
   2   4  -4  522.15   18.70
  -1  -4   4 3934.51   95.99
   1  -4  -4 3943.71  102.29
  -1   4   4 3988.10  101.89
   0  -4  -4  528.25   21.00
   0  -4   4  533.15   14.50
   0  -4  -4  530.35   19.50
   0  -4   4  500.35   18.50
   0   4   4  515.15   21.20
   0   4  -4  521.85   14.30
   0   4  -4  489.25   17.80
  -1  -4  -4 1139.99   37.60
  -1  -4  -4 1085.99   33.50
   1   4   4 1070.79   37.60
  -1   4  -4 1059.09   30.80
   2  -4   4  658.23   23.20
  -2  -4  -4  657.93   24.20
  -2  -4  -4  673.73   28.70
   2  -4   4  673.23   17.40
   2  -4   4  664.73   17.10
   2   4   4  610.34   23.30
   2   4   4  633.54   28.80
  -2   4  -4  662.73   21.30
   3   4   4 3144.89   92.39
   4  -4   4   46.50    7.90
  -4  -4  -4   57.29    8.70
  -4  -4  -4   65.79   12.70
   4  -4   4   55.79    6.30
   4   4   4   44.50    7.20
   4   4   4   51.19   11.10
  -4   4  -4   55.89    6.00
  -4   4  -4   56.69    5.60
  -5  -4  -4 2419.36   78.29
  -5  -4  -4 2289.17   71.89
   5  -4   4 2234.58   68.89
  -5   4  -4 2288.17   60.39
  -5   4  -4 2372.96   63.89
  -5   4  -4 2342.87   61.09
   5   4   4 2397.56   80.99
   5   4   4 2298.37   67.59
   6  -4   4  179.08   15.30
   6  -4   4  208.48   12.60
  -6  -4  -4  226.18   15.30
  -6  -4  -4  219.28   19.70
  -6  -4  -4  191.78   14.40
  -6   4  -4  196.08   12.70
  -6   4  -4  185.58   10.70
  -6   4  -4  201.78   11.90
   6   4   4  190.68   14.50
  -7  -4  -4   24.50    8.20
   7  -4   4   35.30    7.00
   7  -4   4   38.20    9.50
  -7  -4  -4   30.00    7.60
  -7   4  -4   48.20    8.00
  -7   4  -4   38.70    7.60
   7   4   4   25.20    9.00
   7   4   4   38.80    9.10
   8  -4   4  343.87   25.50
   8  -4   4  364.76   20.40
  -8  -4  -4  387.96   29.40
  -8   4  -4  346.97   19.00
  -8   4  -4  352.86   20.00
   8   4   4  339.07   29.90
   8   4   4  367.26   23.00
   9  -4   4  183.58   24.00
   9  -4   4  190.68   15.30
  -9  -4  -4  187.18   27.20
  -9   4  -4  172.28   14.30
   9   4   4  198.78   22.70
   9   4   4  164.18   26.40
  10  -4   4  219.18   28.50
  10  -4   4  228.98   18.00
 -10  -4  -4  248.48   32.20
  10   4   4  267.07   37.50
 -10   4  -4  208.08   16.50
  10   4   4  207.08   18.90
  11  -4   4  293.87   28.40
  11  -4   4  282.67   21.40
  11   4   4  306.77   24.10
 -11   4  -4  251.27   19.10
  11   4   4  264.47   38.40
  12  -4   4   68.09   13.70
  12  -4   4   53.09   16.00
  12   4   4   73.49   26.90
  12   4   4   51.39   13.20
  13  -4   4   75.49   14.50
  13   4   4   78.59   17.60
  14  -4   4   87.39   16.40
  14   4   4  144.69   25.10
  15   5  -4   18.80    9.50
  14  -5  -4  192.58   27.30
  14   5  -4  208.48   29.90
  13  -5  -4   20.50    9.40
  13   5  -4   21.10    9.00
  12  -5  -4  338.77   27.00
  12  -5  -4  305.97   21.40
  12   5  -4  327.77   27.60
  11  -5  -4   37.30   11.50
  11  -5  -4   29.70    8.20
 -11  -5   4   43.70   16.10
  11   5  -4   43.10   12.40
  11   5  -4   36.80   11.00
  10  -5  -4   23.40    6.40
 -10  -5   4   18.10   10.00
  10  -5  -4   20.00    8.10
  10   5  -4   15.20    6.80
  10   5  -4   10.00    5.50
 -10   5   4   25.90    6.50
   9  -5  -4   50.79   12.00
  -9  -5   4   35.30   13.30
   9  -5  -4   53.69    9.20
  -9   5   4   51.89    9.00
   9   5  -4   43.00    9.70
  -8  -5   4 1194.98   45.80
  -8  -5   4 1172.98   59.19
   8  -5  -4 1185.58   39.60
   8  -5  -4 1222.68   47.00
   8   5  -4 1187.38   47.70
  -8   5   4 1214.78   39.80
   8   5  -4 1212.98   46.90
   7  -5  -4   -0.50    1.10
  -7  -5   4    0.10    1.60
   7  -5  -4   -0.40    1.70
  -7  -5   4    5.70    5.40
  -7   5   4    0.80    1.20
   7   5  -4    1.10    2.20
   7   5  -4    2.50    2.90
  -6  -5   4  685.23   29.70
  -6  -5   4  759.42   41.70
   6  -5  -4  705.93   30.00
  -6  -5   4  634.34   28.50
   6  -5  -4  678.43   28.30
   6   5  -4  735.73   30.70
  -6   5   4  670.83   23.90
  -6   5   4  705.53   22.00
   6   5  -4  689.43   30.60
   5  -5  -4  363.86   14.60
  -5  -5   4  367.36   19.20
  -5  -5   4  302.67   17.20
   5  -5  -4  345.87   18.70
  -5  -5   4  354.56   26.40
  -5   5   4  343.57   14.00
   5   5  -4  321.77   18.30
  -5   5   4  336.87   12.50
   5   5  -4  334.57   18.60
   4  -5  -4    5.90    2.00
  -4  -5   4    6.40    2.60
   4  -5  -4    1.60    1.80
  -4  -5   4    2.90    3.40
   4  -5  -4    0.40    1.70
  -4  -5   4    3.50    2.40
  -4   5   4    8.50    2.10
  -4   5   4    5.30    1.80
   4   5  -4    2.50    2.20
   4   5  -4    1.30    1.90
  -3  -5   4  469.55   19.00
   3  -5  -4  464.55   19.70
  -3  -5   4  441.96   26.60
  -3  -5   4  451.35   19.80
   3  -5  -4  471.25   16.60
   3   5  -4  427.86   19.40
  -3   5   4  453.05   15.20
  -3   5   4  458.25   16.20
   3   5  -4  452.45   19.10
  -3   5   4  473.15   19.80
  -2  -5   4 1657.73   45.60
   2  -5  -4 1694.03   48.20
  -2   5   4 1673.23   44.60
   1  -5  -4   17.40    4.30
  -1  -5   4   12.70    2.80
   1  -5  -4   15.70    3.80
  -1  -5   4   19.00    3.90
  -1   5   4   14.80    3.90
   1   5  -4   21.60    3.60
  -1   5   4   13.20    3.60
   0  -5   4  317.27   14.00
   0  -5   4  335.97   11.20
   0  -5  -4  320.77   16.30
   0  -5  -4  332.77   15.40
   0   5   4  362.86   15.70
   0   5   4  304.87   16.20
   0   5  -4  330.97   10.90
   0   5  -4  327.57   13.50
  -1  -5  -4 1513.25   48.00
  -1  -5  -4 1433.06   43.70
   1   5   4 1511.15   48.80
   1   5   4 1480.55   43.70
  -2  -5  -4  144.49   12.60
   2  -5   4  146.29    6.10
   2  -5   4  160.08    9.50
  -2  -5  -4  139.79   10.20
   2  -5   4  146.59    5.90
   2   5   4  147.69   13.20
   2   5   4  123.79    9.50
  -2   5  -4  141.39    7.50
   3  -5   4  152.08    7.30
   3  -5   4  156.78    7.10
  -3  -5  -4  153.58   11.10
   3  -5   4  144.89    9.90
  -3  -5  -4  114.19   14.50
   3   5   4  150.98   11.10
   3   5   4  139.89   14.00
  -4  -5  -4 2200.08   64.29
  -4  -5  -4 2188.88   72.59
   4   5   4 2096.99   73.89
   4   5   4 2220.98   63.79
  -5  -5  -4    1.10    2.50
  -5  -5  -4   -1.00    1.80
   5  -5   4    1.70    1.80
   5  -5   4    7.50    3.60
  -5  -5  -4    8.70    4.00
  -5   5  -4    3.00    1.60
   5   5   4    5.70    3.00
  -5   5  -4    5.00    2.20
  -5   5  -4    3.80    2.20
   5   5   4    5.10    4.50
   6  -5   4  963.10   38.40
  -6  -5  -4  935.11   45.30
   6  -5   4  933.31   32.10
  -6  -5  -4  908.91   37.50
  -6  -5  -4  914.71   36.70
  -6   5  -4  931.31   30.80
  -6   5  -4  945.51   31.40
   6   5   4  892.41   36.70
   7  -5   4  321.17   22.10
  -7  -5  -4  304.87   25.60
  -7  -5  -4  313.87   23.30
   7  -5   4  337.97   18.00
   7   5   4  329.97   28.30
  -7   5  -4  316.77   16.60
   7   5   4  350.76   21.70
  -7   5  -4  310.37   16.20
  -8  -5  -4   30.70    9.80
   8  -5   4   53.39    9.40
  -8  -5  -4   44.90    9.70
   8  -5   4   42.70   10.80
  -8   5  -4   51.99    8.30
  -8   5  -4   49.20    8.90
   8   5   4   55.29   11.00
   8   5   4   68.89   18.10
  -9  -5  -4   52.29   15.20
   9  -5   4   78.39   15.80
   9  -5   4   87.99   13.30
   9   5   4   88.29   15.40
   9   5   4   62.49   17.30
  -9   5  -4   65.29    9.70
 -10  -5  -4  829.32   49.60
  10  -5   4  780.52   45.20
  10  -5   4  837.92   37.10
  10   5   4  902.91   42.60
  10   5   4  776.92   56.79
 -10   5  -4  789.72   34.80
  11  -5   4   12.00    7.30
 -11  -5  -4   11.70    7.80
  11  -5   4   12.50    6.10
 -11   5  -4   23.70    6.50
  11   5   4   15.20    9.30
  12  -5   4  317.87   23.80
  12  -5   4  312.37   30.70
  12   5   4  337.07   27.10
  13  -5   4   40.40   11.30
  13   5   4   36.40   10.80
  14  -5   4    3.90    5.00
  14   5   4    6.10    5.30
  14  -6  -4   27.40   10.00
  14   6  -4   25.00   11.20
  13  -6  -4    9.30    5.70
 -13  -6   4   -0.20    2.80
  13   6  -4   28.80   10.60
  12  -6  -4  227.58   26.30
  12   6  -4  242.88   28.70
  11  -6  -4    5.60    5.00
  11  -6  -4   10.20    4.30
 -11  -6   4    5.10    5.50
  11   6  -4   -0.80    4.10
  11   6  -4   16.30    7.80
  10  -6  -4  267.67   21.40
 -10  -6   4  176.88   25.60
  10  -6  -4  255.87   16.60
  10   6  -4  251.77   21.00
  10   6  -4  195.58   23.20
  -9  -6   4    8.80    7.20
   9  -6  -4   -0.70    2.60
   9  -6  -4    1.50    2.30
   9   6  -4    1.90    3.60
   9   6  -4   -1.50    2.80
   8  -6  -4  324.17   16.50
  -8  -6   4  351.96   30.90
   8  -6  -4  321.17   21.60
  -8  -6   4  310.97   20.90
  -8   6   4  287.17   11.90
   8   6  -4  337.37   22.10
   8   6  -4  293.27   21.50
  -7  -6   4   61.79   16.30
   7  -6  -4   52.19   10.20
   7  -6  -4   69.29    8.70
  -7  -6   4   64.39   11.70
   7   6  -4   67.09   12.40
   7   6  -4   90.69   14.60
   6  -6  -4  713.33   24.30
   6  -6  -4  683.93   29.50
   6  -6  -4  754.72   35.50
  -6  -6   4  776.22   32.10
  -6  -6   4  723.73   42.10
  -6  -6   4  717.63   30.70
   6   6  -4  684.63   30.80
  -5  -6   4   14.40    4.60
   5  -6  -4    6.60    3.00
   5  -6  -4    7.90    3.40
  -5  -6   4    8.80    5.10
   5  -6  -4   10.00    2.80
   5   6  -4    9.30    4.20
   5   6  -4   15.20    5.40
  -4  -6   4 2635.84   73.49
   4  -6  -4 2566.74   73.49
  -4  -6   4 2820.72   90.69
   4   6  -4 2726.83   78.29
   4   6  -4 2741.83   74.89
  -3  -6   4  329.47   16.50
   3  -6  -4  299.57   12.60
   3  -6  -4  313.77   16.10
  -3  -6   4  319.37   22.90
  -3  -6   4  292.27   15.00
  -3   6   4  293.57   15.50
   3   6  -4  317.17   15.70
   3   6  -4  297.97   15.80
  -2  -6   4  667.23   23.00
  -2  -6   4  634.14   24.30
   2  -6  -4  653.83   25.00
   2  -6  -4  663.13   22.40
   2   6  -4  626.34   22.80
   2   6  -4  653.73   24.20
  -2   6   4  657.33   20.80
  -2   6   4  671.73   25.00
  -1  -6   4    0.80    1.60
   1  -6  -4    5.90    2.80
  -1  -6   4    5.00    2.60
   1  -6  -4    4.00    2.50
  -1   6   4    4.00    2.40
  -1   6   4    5.50    2.30
   1   6  -4    1.90    1.80
   1   6  -4    3.60    2.00
   0  -6   4  808.82   25.90
   0  -6  -4  761.92   27.70
   0  -6   4  776.12   22.80
   0  -6  -4  760.12   29.20
   0   6   4  792.32   27.80
   0   6   4  765.72   29.30
   0   6  -4  760.52   24.50
   0   6  -4  786.52   22.50
  -1  -6  -4   59.09    9.80
   1  -6   4   54.09    5.30
  -1  -6  -4   61.49    8.60
   1  -6   4   56.59    3.90
  -1   6  -4   50.89    3.60
   1   6   4   43.20    6.90
  -1   6  -4   49.99    4.40
   1   6   4   79.39   11.80
  -2  -6  -4 1780.82   58.09
  -2  -6  -4 1710.13   52.09
   2   6   4 1744.13   51.59
   2   6   4 1700.73   58.39
   3  -6   4   71.29    6.70
  -3  -6  -4   74.59   10.40
   3  -6   4   73.39    4.90
  -3  -6  -4   77.89   13.00
   3  -6   4   70.59    5.00
   3   6   4   91.49   15.40
  -3   6  -4   72.39    4.80
   3   6   4   82.39   10.80
   4  -6   4  226.18   13.30
   4  -6   4  199.18    9.80
   4  -6   4  233.78   10.80
  -4  -6  -4  186.28   17.40
  -4  -6  -4  208.78   14.60
  -4   6  -4  211.78    9.10
   4   6   4  204.48   14.40
   5  -6   4    0.80    1.30
  -5  -6  -4    5.70    3.60
   5  -6   4    1.10    2.50
  -5  -6  -4    3.10    4.00
   5  -6   4    3.90    2.40
  -5  -6  -4    2.50    2.70
   5   6   4    2.60    3.00
  -5   6  -4    3.30    1.50
  -5   6  -4    1.40    1.40
   5   6   4    8.00    5.50
  -6  -6  -4  123.89   11.90
  -6  -6  -4  141.39   21.60
   6  -6   4  132.79    9.90
   6  -6   4  135.59   12.40
   6  -6   4  113.49    8.70
   6   6   4  133.49   20.90
  -6   6  -4  125.89    7.60
   6   6   4  110.19   14.40
  -7  -6  -4   33.40    7.70
  -7  -6  -4   41.90   11.40
   7  -6   4   48.10    8.50
   7  -6   4   39.20    9.20
  -7   6  -4   55.49    6.90
   7   6   4   90.19   19.70
  -7   6  -4   38.30    7.00
   7   6   4   52.19   11.30
   8  -6   4 1297.57   45.20
   8  -6   4 1211.68   51.79
  -8  -6  -4 1399.66   63.19
  -8  -6  -4 1243.28   49.80
  -8   6  -4 1277.07   43.70
   8   6   4 1397.56   67.59
  -8   6  -4 1306.67   39.60
   8   6   4 1372.46   51.99
  -9  -6  -4    8.60    6.20
   9  -6   4   13.80    5.40
   9  -6   4    9.50    5.70
   9   6   4   10.70    7.70
   9   6   4   13.10    5.90
  -9   6  -4   10.90    3.80
 -10  -6  -4   29.20   11.90
  10  -6   4   45.00   10.20
  10  -6   4   22.80    9.20
  10   6   4   40.30   15.60
  10   6   4   28.10    9.20
 -11  -6  -4   22.90   10.80
  11  -6   4   17.80    6.90
  11  -6   4   16.10    8.10
  11   6   4   15.70    7.20
  12  -6   4  130.89   25.10
  12  -6   4  131.59   18.60
  12   6   4  111.09   20.30
 -13  -6  -4   -0.80    2.80
  13  -6   4    2.20    2.90
  13   6   4    8.90    6.60
  14  -6   4  314.47   25.80
  14   6   4  330.87   50.79
  14  -7  -4  105.79   20.30
  14   7  -4  140.79   35.40
 -13  -7   4    0.50    2.60
  13  -7  -4    3.00    3.80
  13   7  -4    4.00    5.70
  12  -7  -4  134.09   20.80
  12   7  -4  182.18   26.10
  11  -7  -4  117.39   21.00
 -11  -7   4   92.59   19.70
  11  -7  -4  101.09   13.20
  11   7  -4  124.59   21.00
  10  -7  -4   -0.80    2.00
 -10  -7   4    4.40    5.50
  10  -7  -4    2.10    2.10
  10   7  -4    3.40    4.10
  10   7  -4   -1.30    2.30
   9  -7  -4  124.59   18.00
  -9  -7   4  170.98   30.20
   9  -7  -4  138.19   11.10
   9   7  -4  130.09   17.80
   9   7  -4  144.09   20.80
   8  -7  -4 1031.00   43.40
  -8  -7   4 1035.40   43.40
  -8  -7   4  990.20   56.39
   8  -7  -4 1072.89   34.90
   8   7  -4 1127.99   45.20
   8   7  -4  988.20   44.30
   7  -7  -4   20.30    7.00
  -7  -7   4   24.70    7.80
   7  -7  -4   13.80    3.60
  -7  -7   4   20.70   11.00
   7   7  -4   11.20    4.90
   7   7  -4   12.00    5.90
   6  -7  -4  139.59   12.60
  -6  -7   4  114.89   11.70
   6  -7  -4  126.69    8.00
  -6  -7   4  152.58   25.20
   6   7  -4  117.29   14.20
   6   7  -4   99.89   13.40
  -5  -7   4  494.65   33.50
  -5  -7   4  439.16   22.50
   5  -7  -4  503.05   18.90
   5  -7  -4  464.25   23.40
  -5  -7   4  472.45   23.80
   5  -7  -4  500.95   23.30
   5   7  -4  499.35   24.30
   5   7  -4  463.15   23.40
  -4  -7   4    2.00    2.10
   4  -7  -4    7.00    3.70
  -4  -7   4    6.00    4.90
   4  -7  -4    6.20    3.30
  -4  -7   4    5.30    3.20
   4  -7  -4    3.60    1.80
  -4   7   4    7.40    3.50
   4   7  -4    6.10    3.60
   4   7  -4    2.10    2.20
  -3  -7   4  824.52   41.10
  -3  -7   4  860.31   30.60
   3  -7  -4  915.31   27.00
  -3  -7   4  879.11   32.00
   3  -7  -4  848.82   31.70
   3   7  -4  888.01   31.50
  -3   7   4  892.91   31.80
   3   7  -4  851.41   30.80
   2  -7  -4 2030.20   59.69
  -2  -7   4 2072.09   56.79
  -2  -7   4 2063.29   58.69
  -2  -7   4 2156.28   71.49
   2   7  -4 2099.49   57.09
   1  -7  -4  182.58   11.80
   1  -7  -4  193.78   12.60
  -1  -7   4  193.98   11.40
  -1  -7   4  200.28   10.50
   1   7  -4  199.78   11.10
  -1   7   4  188.78   11.20
   1   7  -4  209.08   10.50
  -1   7   4  197.08   12.40
   0  -7  -4  778.82   29.40
   0  -7   4  832.82   26.90
   0  -7   4  811.92   26.90
   0  -7  -4  803.52   31.00
   0   7  -4  801.02   24.20
   0   7  -4  819.32   25.60
   0   7   4  784.42   30.60
  -1  -7  -4  135.49   10.60
   1  -7   4  131.59    8.70
   1  -7   4  131.39    7.10
  -1  -7  -4  137.79   12.20
   1   7   4  133.99   10.40
  -1   7  -4  124.79    6.60
   1   7   4  124.29   11.70
   2  -7   4   11.20    3.10
  -2  -7  -4   13.10    4.20
   2  -7   4   11.10    2.60
  -2  -7  -4   13.50    5.60
   2   7   4   14.10    4.70
   2   7   4   14.40    6.00
  -2   7  -4   12.60    2.40
  -2   7  -4   22.80    3.40
  -3  -7  -4  573.84   26.30
  -3  -7  -4  581.34   31.30
   3  -7   4  607.54   20.90
   3  -7   4  607.64   19.60
   3  -7   4  638.84   22.90
  -3   7  -4  598.34   17.00
   3   7   4  587.24   32.10
   3   7   4  571.64   25.70
   4  -7   4  601.44   20.40
  -4  -7  -4  614.94   33.50
  -4  -7  -4  515.25   25.80
   4  -7   4  565.04   22.80
   4  -7   4  564.14   19.50
  -4   7  -4  557.94   15.30
   4   7   4  546.65   26.10
   4   7   4  547.45   33.00
  -4   7  -4  562.24   16.90
  -5  -7  -4   14.00    6.00
  -5  -7  -4   18.20    6.10
   5  -7   4   11.70    3.40
   5  -7   4    9.50    3.90
   5  -7   4   15.60    4.00
   5   7   4    8.00    3.90
   5   7   4   17.40    8.70
  -5   7  -4   14.90    1.90
  -5   7  -4   13.40    1.80
  -6  -7  -4  486.65   26.00
  -6  -7  -4  523.55   34.10
   6  -7   4  492.85   21.20
   6  -7   4  516.65   20.80
   6  -7   4  535.65   25.60
   6   7   4  493.25   26.60
   6   7   4  458.75   33.80
  -7  -7  -4   68.99   14.40
   7  -7   4  100.09   12.30
   7  -7   4  113.79   15.30
  -7  -7  -4  107.69   15.80
   7  -7   4   88.89   10.40
   7   7   4   89.89   19.10
   7   7   4   83.49   14.50
  -7   7  -4   91.29    5.00
   8  -7   4  123.89   15.00
  -8  -7  -4  110.69   16.20
   8  -7   4  110.59   12.60
   8  -7   4  101.09   16.00
  -8  -7  -4  140.29   25.00
   8   7   4  115.29   16.30
   8   7   4   94.39   19.70
  -9  -7  -4  169.08   26.80
   9  -7   4  181.38   18.30
   9  -7   4  180.58   14.80
   9   7   4  160.68   20.10
  10  -7   4  229.98   17.90
 -10  -7  -4  275.47   36.80
  10  -7   4  249.18   23.20
  10   7   4  234.58   27.30
  11  -7   4   -0.60    1.60
  11  -7   4    1.90    2.60
 -11  -7  -4   -0.40    2.20
  11   7   4   -0.70    2.60
  12  -7   4  244.28   20.60
  12  -7   4  230.88   32.70
  12   7   4  254.77   31.10
  13  -7   4  137.49   20.10
  13   7   4  130.09   22.20
  14  -7   4    7.70    5.50
  14   7   4   -0.70    2.60
  14  -8  -4    0.50    3.00
  14   8  -4   11.00    8.70
  13  -8  -4  155.78   22.60
  13   8  -4  250.37   31.60
  12  -8  -4   20.50    9.00
  12   8  -4   15.00    8.20
 -11  -8   4   45.10   14.40
  11  -8  -4   77.69   15.00
  11   8  -4   87.89   16.40
  10  -8  -4   65.39   13.70
 -10  -8   4   63.49   15.70
  10  -8  -4   73.89   10.40
  10   8  -4  107.89   19.20
  10   8  -4   85.79   16.50
  -9  -8   4  212.48   30.30
   9  -8  -4  297.57   15.90
   9  -8  -4  264.67   21.30
   9   8  -4  251.67   21.20
   9   8  -4  278.47   22.60
   8  -8  -4   49.99    7.20
  -8  -8   4   30.70    7.60
   8  -8  -4   56.09   11.60
  -8  -8   4   49.10   15.70
   8   8  -4   24.30    7.80
   8   8  -4   40.00    9.60
  -7  -8   4  865.41   38.30
   7  -8  -4  906.21   28.60
  -7  -8   4  879.41   51.89
   7  -8  -4  852.21   37.50
   7   8  -4  885.41   38.60
   7   8  -4  906.61   39.70
  -6  -8   4  133.19   12.90
   6  -8  -4  127.99    7.80
   6  -8  -4  145.09   13.20
  -6  -8   4  143.09   24.20
   6   8  -4  136.99   13.10
   6   8  -4  144.09   17.00
  -5  -8   4    4.30    2.80
   5  -8  -4    6.60    3.90
   5  -8  -4   10.70    5.00
  -5  -8   4    7.40    3.30
  -5  -8   4    6.10    5.50
   5  -8  -4    6.90    2.40
   5   8  -4    5.80    3.80
   5   8  -4   11.50    4.50
  -4  -8   4  762.62   42.00
   4  -8  -4  764.02   31.10
   4  -8  -4  805.22   23.90
  -4  -8   4  738.53   31.10
  -4  -8   4  785.32   33.30
   4   8  -4  795.72   31.50
  -4   8   4  774.62   31.00
   4   8  -4  771.72   31.00
   3  -8  -4   22.60    4.10
  -3  -8   4   30.50    6.20
  -3  -8   4   17.40    7.60
   3  -8  -4   27.00    6.60
  -3  -8   4   43.70    8.20
   3   8  -4   28.70    6.30
   3   8  -4   28.80    6.00
  -3   8   4   22.00    5.90
  -2  -8   4   21.20    4.80
  -2  -8   4   12.90    6.20
   2  -8  -4   16.90    4.10
  -2  -8   4   20.50    5.30
  -2   8   4   34.30    7.20
   2   8  -4   25.90    5.30
   2   8  -4   22.00    5.10
   1  -8  -4 3007.30   86.79
  -1  -8   4 3087.49   78.19
   0  -8   4  674.33   22.60
   0  -8  -4  674.33   28.50
   0  -8  -4  634.74   29.40
   0  -8   4  671.93   24.10
   0   8  -4  638.54   22.10
   0   8  -4  666.13   21.90
   0   8   4  654.43   26.70
   1  -8   4   68.59    5.60
  -1  -8  -4   71.69   11.00
   1  -8   4   71.69    6.40
  -1  -8  -4   75.89   11.30
   1   8   4   95.49   15.40
   1   8   4   72.09   10.50
  -1   8  -4   76.89    5.60
  -1   8  -4   74.89    5.30
  -2  -8  -4  227.38   18.00
   2  -8   4  230.78   12.00
   2  -8   4  236.98   10.60
  -2  -8  -4  236.48   15.50
  -2   8  -4  205.08    9.70
   2   8   4  253.77   15.80
   2   8   4  211.38   17.50
  -2   8  -4  223.78    8.60
  -3  -8  -4  955.80   42.40
   3  -8   4  888.51   27.10
   3  -8   4  884.81   27.30
  -3  -8  -4  876.11   35.30
   3  -8   4  947.21   30.00
   3   8   4  800.92   40.40
   3   8   4  913.11   35.40
   4  -8   4    8.10    2.70
   4  -8   4    3.00    1.90
  -4  -8  -4    2.80    2.70
  -4  -8  -4    1.50    2.60
   4  -8   4    5.40    2.90
   4   8   4    5.30    3.70
   4   8   4    2.90    2.80
   5  -8   4 1148.69   35.30
  -5  -8  -4 1164.38   52.69
  -5  -8  -4 1054.19   41.60
   5  -8   4 1109.19   37.80
   5  -8   4 1109.69   34.20
   5   8   4 1086.09   42.70
   5   8   4 1074.09   52.89
   6  -8   4  140.69   10.00
  -6  -8  -4  186.38   26.40
  -6  -8  -4  149.39   14.00
   6  -8   4  143.09   12.20
   6  -8   4  151.68   10.70
   6   8   4  120.59   21.20
   6   8   4  153.08   19.20
   7  -8   4  117.89   10.30
  -7  -8  -4  145.89   25.40
   7  -8   4  107.39    9.40
  -7  -8  -4   91.49   14.60
   7  -8   4  121.29   12.30
   7   8   4  125.79   17.80
  -8  -8  -4  163.18   16.00
   8  -8   4  163.28   12.40
   8  -8   4  162.78   13.30
  -8  -8  -4  143.69   22.70
   8  -8   4  162.08   15.80
   8   8   4  122.69   16.60
  -9  -8  -4  219.68   31.20
   9  -8   4  174.38   14.70
   9  -8   4  199.98   18.80
   9   8   4  250.07   27.90
 -10  -8  -4    2.20    4.50
  10  -8   4   13.80    7.60
  10  -8   4   16.40    6.40
  10   8   4   13.30    6.60
  11  -8   4  380.06   30.50
  11  -8   4  414.16   25.80
  11   8   4  406.26   30.20
 -12  -8  -4    0.70    2.80
  12  -8   4    5.60    4.40
  12  -8   4    4.10    5.50
  12   8   4   -2.80    2.30
  13  -8   4   95.09   16.60
  13   8   4  120.69   22.00
 -13  -9   4    0.20    3.50
  13  -9  -4   14.20    7.30
  13   9  -4    8.80    6.00
  12  -9  -4   -0.20    2.30
 -12  -9   4   -0.40    2.50
  12   9  -4    5.40    6.00
 -11  -9   4  477.05   43.60
  11  -9  -4  422.96   29.70
  11   9  -4  403.96   31.00
  10  -9  -4    9.80    3.70
 -10  -9   4   10.50    9.20
  10  -9  -4    2.80    3.20
   9  -9  -4  647.14   24.80
  -9  -9   4  618.34   47.20
   9  -9  -4  652.53   34.70
   9   9  -4  596.44   34.20
   9   9  -4  605.84   35.20
  -8  -9   4  238.38   41.70
   8  -9  -4  192.88   22.10
   8  -9  -4  190.68   11.10
  -8  -9   4  195.58   18.30
   8   9  -4  192.68   18.00
   8   9  -4  152.78   19.30
   7  -9  -4   16.00    6.70
   7  -9  -4   13.30    3.30
  -7  -9   4    6.50    4.20
   7   9  -4   14.40    6.20
   7   9  -4    7.80    5.30
  -6  -9   4   47.60   14.50
  -6  -9   4   48.90   10.60
   6  -9  -4   40.10    5.10
   6  -9  -4   33.80    8.10
   6   9  -4   27.00    7.50
   6   9  -4   43.20    9.50
   5  -9  -4 1101.59   41.90
  -5  -9   4 1167.88   56.99
  -5  -9   4 1063.99   44.10
  -5  -9   4 1028.80   41.20
   5  -9  -4 1137.19   30.40
   5   9  -4 1056.09   41.20
   5   9  -4 1078.49   41.10
  -4  -9   4   33.10    7.90
  -4  -9   4   13.50    4.80
  -4  -9   4   21.70    8.50
   4  -9  -4   25.90    7.80
   4  -9  -4   21.60    3.80
   4   9  -4   27.50    6.60
   4   9  -4   23.10    6.20
  -4   9   4   18.40    5.30
  -3  -9   4 1418.96   45.80
  -3  -9   4 1484.35   60.99
  -3  -9   4 1359.16   46.50
   3  -9  -4 1433.66   47.70
   3   9  -4 1413.66   45.70
  -3   9   4 1447.66   47.40
   2  -9  -4  121.59    9.10
  -2  -9   4  148.09   20.80
  -2  -9   4  116.29    9.90
   2  -9  -4  118.19   10.70
  -2  -9   4  118.69    9.60
   2   9  -4  117.09    9.50
  -2   9   4  127.29   10.90
   2   9  -4  127.69    9.80
  -1  -9   4  114.09   16.10
   1  -9  -4  128.09   10.50
  -1  -9   4  117.39    8.90
   1  -9  -4  102.39   11.80
  -1  -9   4  123.29    9.60
   1   9  -4  116.29    8.70
  -1   9   4  125.99   10.70
  -1   9   4  116.19    8.30
   1   9  -4  117.79    8.70
   0  -9   4   11.40    3.40
   0  -9  -4   14.30    5.20
   0  -9   4    4.90    2.50
   0  -9  -4   11.70    5.00
   0   9  -4   13.90    3.50
   0   9   4    7.20    3.20
   0   9   4    7.10    3.40
   0   9  -4   11.20    3.30
  -1  -9  -4 1318.07   48.60
  -1  -9  -4 1255.27   44.70
   1  -9   4 1283.07   39.00
   1  -9   4 1332.47   38.10
  -1   9  -4 1300.17   35.20
   1   9   4 1290.87   47.70
  -1   9  -4 1322.97   37.10
   1   9   4 1324.67   44.60
  -2  -9  -4    5.80    3.70
  -2  -9  -4    6.10    4.00
   2  -9   4    7.30    2.90
   2  -9   4    5.20    2.10
  -2   9  -4    5.60    1.30
  -2   9  -4    5.90    2.20
   2   9   4    7.50    4.70
   3  -9   4  754.02   26.20
  -3  -9  -4  752.12   38.60
   3  -9   4  746.73   24.80
   3  -9   4  733.53   24.80
   3   9   4  728.43   38.30
   3   9   4  778.12   32.60
   4  -9   4  197.88   11.10
  -4  -9  -4  182.88   27.30
   4  -9   4  212.18   12.50
  -4  -9  -4  223.48   16.10
   4  -9   4  239.68   12.30
   4   9   4  231.58   16.90
   5  -9   4    3.40    2.60
   5  -9   4    4.20    2.30
   5  -9   4    7.20    2.90
  -5  -9  -4    0.90    2.00
   5   9   4   10.40    4.90
  -6  -9  -4  187.38   27.40
   6  -9   4  157.68   12.50
   6  -9   4  139.99   10.80
  -6  -9  -4  143.99   14.30
   6  -9   4  153.68   10.70
   6   9   4  185.88   21.60
  -7  -9  -4  851.01   49.80
  -7  -9  -4  888.11   40.60
   7  -9   4  911.21   37.20
   7  -9   4  936.31   34.00
   7   9   4  883.91   41.20
  -8  -9  -4   -3.40    2.10
   8  -9   4   -0.50    1.00
  -8  -9  -4   -1.00    1.30
   8  -9   4    0.70    1.90
   8   9   4   -0.70    1.80
   9  -9   4  501.95   25.70
  -9  -9  -4  497.55   39.40
   9  -9   4  414.26   27.50
   9   9   4  474.25   30.90
 -10  -9  -4   27.30   11.20
  10  -9   4   28.60    9.40
  10  -9   4   22.30    7.20
  10   9   4   20.90    8.60
 -11  -9  -4    3.40    4.70
  11  -9   4   -0.70    1.80
  11  -9   4    3.90    3.50
  11   9   4    1.40    3.70
  12  -9   4   17.40    9.90
 -12  -9  -4    1.30    3.10
  12  -9   4   14.30    6.20
  12   9   4    9.50    5.80
  13  -9   4  208.18   24.60
  13 -10  -4  243.68   31.60
  13  10  -4  156.68   26.70
  12 -10  -4  160.88   23.40
  12  10  -4  178.78   27.90
  11 -10  -4   52.19   13.10
 -11 -10   4   31.10   13.50
  11  10  -4   44.30   12.30
 -10 -10   4  237.78   40.50
  10 -10  -4  170.28   25.20
  10  10  -4  178.98   24.30
  -9 -10   4   72.79   19.50
   9 -10  -4   56.39   11.70
   9 -10  -4   88.69    7.60
   9  10  -4   60.49   12.70
   8 -10  -4  108.09    7.80
   8 -10  -4  105.59   15.10
  -8 -10   4  106.69   20.80
   8  10  -4  129.49   18.20
   8  10  -4  124.59   18.70
   7 -10  -4  542.25   18.50
  -7 -10   4  506.05   40.40
  -7 -10   4  515.65   29.60
   7 -10  -4  545.15   29.30
   7  10  -4  514.35   29.70
   7  10  -4  557.94   30.20
   6 -10  -4  132.99    7.10
   6 -10  -4  160.88   19.30
  -6 -10   4  144.19   18.00
  -6 -10   4  148.89   26.30
   6  10  -4  131.49   13.40
   6  10  -4  109.79   14.80
  -5 -10   4  109.09   19.70
   5 -10  -4  134.99    7.00
   5 -10  -4  102.99   13.40
  -5 -10   4  145.69   19.60
   5  10  -4  123.89   15.30
   5  10  -4  119.19   12.00
  -4 -10   4 1052.19   40.00
  -4 -10   4 1131.69   55.59
   4 -10  -4 1091.39   31.40
  -4 -10   4 1179.68   42.50
  -4  10   4 1101.19   40.90
   4  10  -4 1108.89   41.10
   4  10  -4 1056.89   41.40
  -3 -10   4  128.09   15.80
   3 -10  -4  101.69    7.70
  -3 -10   4  103.59   10.30
  -3 -10   4  138.19   22.60
  -3  10   4  128.59   15.20
   3  10  -4   95.29   11.70
   3  10  -4  100.39    9.60
  -2 -10   4  206.08   19.70
  -2 -10   4  157.68   11.60
   2 -10  -4  195.08   21.40
   2 -10  -4  171.58   11.50
  -2 -10   4  146.19   11.60
  -2  10   4  164.08   13.00
   2  10  -4  160.38   11.30
   2  10  -4  152.78   11.30
  -1 -10   4  577.24   32.30
   1 -10  -4  518.35   25.20
  -1 -10   4  542.05   22.40
   1 -10  -4  523.85   24.20
  -1 -10   4  529.75   22.80
  -1  10   4  509.85   24.60
   1  10  -4  502.85   21.30
   0 -10  -4  301.97   19.10
   0 -10   4  297.47   15.30
   0 -10   4  287.37   14.60
   0 -10  -4  293.17   19.10
   0  10   4  282.67   17.50
   0  10  -4  277.77   13.90
   0  10  -4  302.37   13.40
  -1 -10  -4  111.89   15.70
   1 -10   4  125.99    8.80
   1 -10   4  101.79    8.30
  -1  10  -4  104.99    6.30
  -1  10  -4  107.69    7.80
   1  10   4  135.39   11.90
  -2 -10  -4 1776.92   62.59
   2 -10   4 1647.84   47.30
   2 -10   4 1593.54   46.40
  -2  10  -4 1632.34   45.60
   2  10   4 1616.94   54.39
  -3 -10  -4  400.36   27.80
   3 -10   4  445.86   18.10
   3 -10   4  404.96   17.20
   3 -10   4  411.16   17.90
  -3 -10  -4  441.26   22.80
   3  10   4  430.26   23.90
   4 -10   4   50.39    7.20
   4 -10   4   57.09    7.40
  -4 -10  -4   56.69   14.00
   4 -10   4   52.79    7.80
  -4 -10  -4   43.90    8.90
   4  10   4   54.29   10.10
  -5 -10  -4  623.34   31.40
   5 -10   4  693.93   25.80
  -5 -10  -4  686.03   41.10
   5 -10   4  657.13   25.00
   5 -10   4  664.03   26.20
   5  10   4  716.33   33.80
  -6 -10  -4  189.78   16.70
   6 -10   4  176.78   13.00
  -6 -10  -4  226.08   29.40
   6 -10   4  177.58   11.80
   6 -10   4  171.48   12.10
   6  10   4  162.98   19.00
  -7 -10  -4   33.70    9.10
   7 -10   4   33.50    7.30
  -7 -10  -4   29.40   11.10
   7 -10   4   28.00    6.30
   7 -10   4   39.00    8.40
   7  10   4   19.60    7.20
   8 -10   4  453.45   25.70
  -8 -10  -4  548.05   41.00
   8 -10   4  532.55   25.40
   8 -10   4  552.54   28.60
  -8 -10  -4  458.85   29.60
   8  10   4  534.45   32.30
   9 -10   4   20.00    7.60
   9 -10   4   17.90    6.00
  -9 -10  -4   23.40   11.80
   9  10   4    9.20    6.50
  10 -10   4    4.30    4.00
 -10 -10  -4    1.10    2.90
  10 -10   4    2.30    3.00
  10  10   4    2.50    4.20
  11 -10   4  255.07   19.90
 -11 -10  -4  251.57   36.40
  11 -10   4  261.07   23.70
  11  10   4  214.08   27.00
  12 -10   4    1.70    3.40
 -12 -10  -4    7.00    7.40
  12 -10   4    1.80    3.30
  12  10   4   12.00    7.90
  13 -10   4    2.20    2.80
 -13 -10  -4   -0.20    3.60
  13  10   4    0.90    3.10
  13 -11  -4    6.60    5.00
 -13 -11   4   -0.20    3.50
  13  11  -4    2.00    4.40
 -12 -11   4   69.29   21.60
  12 -11  -4  127.29   21.50
  12  11  -4  148.49   24.90
  11 -11  -4   28.90    9.90
 -11 -11   4   28.10   15.10
  11  11  -4   29.10   10.10
 -10 -11   4    7.80    9.20
  10 -11  -4    4.40    4.20
  10  11  -4    5.80    5.80
   9 -11  -4   16.60    6.60
  -9 -11   4   15.30    9.70
   9  11  -4   28.70   12.10
   8 -11  -4  770.42   24.10
   8 -11  -4  820.12   38.80
  -8 -11   4  674.93   50.59
  -8 -11   4  842.02   50.69
   8  11  -4  743.13   38.90
   7 -11  -4   67.39    4.90
   7 -11  -4   60.59   12.30
  -7 -11   4   51.89   15.10
  -7 -11   4   79.59   14.40
   7  11  -4   55.39   11.40
   7  11  -4   55.29   11.50
   6 -11  -4  392.26   13.40
  -6 -11   4  417.46   35.90
   6 -11  -4  432.66   25.30
  -6 -11   4  413.86   25.60
   6  11  -4  423.56   25.70
   6  11  -4  448.16   27.00
   5 -11  -4   17.20    5.90
  -5 -11   4   14.40    5.40
   5 -11  -4   27.40    3.70
  -5 -11   4   15.90    8.30
   5  11  -4   16.20    5.60
   5  11  -4   13.80    5.40
  -4 -11   4   46.10   15.10
   4 -11  -4   38.50    5.20
  -4 -11   4   38.80    8.50
  -4  11   4   36.80    7.90
   4  11  -4   31.30    7.80
  -3 -11   4    4.70    3.30
  -3 -11   4    6.70    5.80
  -3 -11   4    3.20    2.80
   3 -11  -4    5.20    2.50
   3  11  -4    0.70    2.70
   3  11  -4    2.70    2.20
  -3  11   4    6.10    4.00
  -2 -11   4 1092.79   39.70
  -2 -11   4 1169.28   53.29
   2 -11  -4 1187.48   38.70
  -2  11   4 1127.59   41.50
   2  11  -4 1073.39   37.50
   2  11  -4 1125.69   38.70
  -1 -11   4    2.00    2.20
   1 -11  -4    3.30    2.90
  -1 -11   4   -0.70    0.90
  -1 -11   4   -0.80    2.60
  -1  11   4    1.40    2.40
   1  11  -4   -1.30    0.90
   1  11  -4    2.60    2.10
   0 -11  -4  842.22   36.10
   0 -11   4  817.02   30.10
   0 -11   4  849.02   40.20
   0 -11   4  844.22   30.20
   0  11  -4  819.62   29.00
   0  11   4  841.42   34.30
  -1 -11  -4  315.17   21.90
   1 -11   4  280.67   14.90
   1 -11   4  294.17   15.10
   1  11   4  290.07   18.90
  -1  11  -4  293.57   14.40
   2 -11   4  125.29    9.20
  -2 -11  -4  127.89   11.50
   2 -11   4  129.69    9.60
  -2 -11  -4  134.29   18.70
  -2  11  -4  143.49    9.40
   2  11   4  115.29   14.10
  -3 -11  -4   68.69   13.40
  -3 -11  -4   87.39   12.60
   3 -11   4   90.99    7.90
   3 -11   4   90.09    7.80
   3  11   4   97.79   14.80
   4 -11   4 1523.35   46.60
  -4 -11  -4 1606.94   55.39
  -4 -11  -4 1617.24   66.89
   4 -11   4 1592.74   47.00
   4 -11   4 1574.64   46.90
   4  11   4 1589.54   56.89
  -5 -11  -4    0.20    3.10
   5 -11   4    1.00    2.30
   5 -11   4   -0.30    1.60
   5 -11   4   -0.10    1.50
   5  11   4    2.20    3.50
   6 -11   4  811.22   30.40
   6 -11   4  713.93   31.80
  -6 -11  -4  750.92   46.40
   6 -11   4  786.72   30.50
  -6 -11  -4  738.33   36.70
   6  11   4  826.32   39.10
   7 -11   4   61.59    9.30
  -7 -11  -4   52.79   14.50
   7 -11   4   74.79   10.90
  -7 -11  -4   81.99   15.30
   7  11   4   83.09   15.00
  -8 -11  -4   52.59   16.40
   8 -11   4   54.19   10.80
  -8 -11  -4   36.90    9.80
   8 -11   4   45.60    9.00
   9 -11   4   33.50    8.50
   9 -11   4   42.10    9.90
  -9 -11  -4   56.59   16.50
   9  11   4   36.60   11.20
  10 -11   4  310.47   23.30
  10 -11   4  306.87   21.00
 -10 -11  -4  301.17   40.90
  10  11   4  311.27   26.70
  11 -11   4    0.70    2.20
  11 -11   4    4.70    4.30
 -11 -11  -4    1.10    3.40
  11  11   4   -0.50    2.90
  12 -11   4  130.99   21.10
  12 -11   4  141.59   24.80
  12  11   4  189.98   30.20
  12 -12  -4   80.79   17.10
 -12 -12   4   88.49   24.60
  12  12  -4  107.19   20.20
  11 -12  -4   27.80    9.20
 -11 -12   4   29.00   12.30
  11  12  -4   20.60    9.00
  10 -12  -4  442.96   30.30
  10  12  -4  407.76   31.00
   9 -12  -4   10.70   10.10
  -9 -12   4   -0.10    4.10
  -9 -12   4    3.30    6.20
   9  12  -4    6.10    5.70
   8 -12  -4   28.60    8.60
  -8 -12   4   28.00    8.80
  -8 -12   4   38.10   14.40
   8  12  -4   27.70    9.10
   7 -12  -4   58.29   12.60
  -7 -12   4   24.60   12.90
  -7 -12   4   49.10   11.20
   7  12  -4   43.10   11.10
   6 -12  -4   82.79   14.10
  -6 -12   4  132.69   24.30
  -6 -12   4  138.89   18.90
   6  12  -4   97.79   15.10
   5 -12  -4    9.70    5.00
  -5 -12   4   19.40    6.80
   5 -12  -4   18.90    3.00
  -5 -12   4   28.20   12.60
   5  12  -4   11.40    5.10
  -4 -12   4 1116.49   44.60
   4 -12  -4 1162.78   33.80
  -4 -12   4 1180.28   60.09
   4  12  -4 1198.28   44.60
  -4  12   4 1224.78   45.00
  -3 -12   4   10.20    6.30
  -3 -12   4   -0.50    3.40
  -3 -12   4    3.80    2.90
   3 -12  -4    6.00    3.20
   3  12  -4    2.40    3.50
  -3  12   4    3.20    3.40
  -2 -12   4  110.39   13.20
  -2 -12   4   91.49   17.00
  -2 -12   4  103.39   10.40
   2 -12  -4  106.59    9.90
  -2  12   4   77.19   12.60
   2  12  -4   79.99   11.20
   1 -12  -4   92.19   12.90
  -1 -12   4   80.19   15.30
   1  12  -4   82.89   10.70
  -1  12   4  106.39   14.60
   0 -12   4  449.86   20.80
   0 -12  -4  460.05   25.80
   0 -12   4  444.86   28.70
   0 -12   4  391.76   19.90
   0  12  -4  444.56   20.00
   0  12   4  438.06   24.10
   1 -12   4   15.20    4.60
   1 -12   4   21.20    5.30
  -1 -12  -4   17.20    5.50
  -1 -12  -4   15.30    6.20
   1 -12   4   26.60    8.40
   1  12   4    7.20    3.90
  -1  12  -4   18.10    4.90
   2 -12   4 1336.87   40.70
  -2 -12  -4 1265.67   54.09
  -2 -12  -4 1298.77   45.50
   2 -12   4 1240.78   40.60
   2  12   4 1232.78   47.70
  -2  12  -4 1305.47   39.90
   3 -12   4   76.79    7.30
   3 -12   4   79.49    9.80
  -3 -12  -4   60.29   14.70
  -3 -12  -4   60.69   10.30
  -3  12  -4   70.59    9.00
   3  12   4   65.89   12.30
   4 -12   4  140.09   10.70
  -4 -12  -4  142.79   13.90
   4 -12   4  145.09   10.60
   4 -12   4  138.69   10.10
  -4 -12  -4  137.19   20.40
   4  12   4  153.78   18.20
  -5 -12  -4   40.10   10.40
   5 -12   4   40.40    7.10
  -5 -12  -4   56.29   16.40
   5 -12   4   52.69    8.40
   5 -12   4   48.10    7.70
   5  12   4   47.20   11.20
  -6 -12  -4  180.58   17.30
   6 -12   4  210.68   14.10
   6 -12   4  218.18   13.90
   6 -12   4  221.98   14.20
  -6 -12  -4  269.77   34.70
   6  12   4  243.08   27.30
  -7 -12  -4   18.90   10.70
   7 -12   4    5.70    3.60
  -7 -12  -4   21.20    8.40
   7 -12   4   13.80    7.40
   7 -12   4    3.80    3.10
   7  12   4   -1.20    2.50
   8 -12   4  482.95   24.90
  -8 -12  -4  574.14   38.00
  -8 -12  -4  507.65   41.30
   8 -12   4  489.25   25.60
   8  12   4  524.75   33.30
  -9 -12  -4   86.49   22.10
   9 -12   4   70.19   12.10
   9 -12   4   75.09   12.90
   9  12   4   94.29   18.10
  10 -12   4   46.60   10.00
 -10 -12  -4   44.10   16.90
  10 -12   4   39.10    9.90
  10  12   4   39.50   13.30
  11 -12   4   20.90    7.80
 -11 -12  -4   21.30   13.30
  11 -12   4   21.90    7.80
  11  12   4   10.60    6.90
  12 -12   4   95.29   16.60
  12 -12   4   62.09   13.70
  12  12   4   73.19   17.80
  12 -13  -4   65.49   16.00
 -12 -13   4   30.10   19.90
  12  13  -4   89.99   31.10
 -11 -13   4  220.08   42.90
  11 -13  -4  117.49   19.00
  11  13  -4  123.19   22.50
  10 -13  -4    2.90    3.80
 -10 -13   4    4.70    6.60
  10  13  -4    7.00    5.40
   9 -13  -4  241.08   21.50
  -9 -13   4  191.28   32.50
   9  13  -4  244.98   29.50
  -8 -13   4   56.09   12.00
   8 -13  -4   70.09   14.20
  -8 -13   4   40.90   13.30
   8  13  -4   78.09   22.00
   7 -13  -4   -0.60    1.80
  -7 -13   4    5.30    4.00
  -7 -13   4   10.40    7.80
   7  13  -4   -0.30    2.40
   6 -13  -4  213.98   18.40
  -6 -13   4  161.98   27.70
  -6 -13   4  210.58   18.80
   6  13  -4  242.18   19.80
   5 -13  -4  489.15   14.80
   5 -13  -4  544.85   29.60
  -5 -13   4  426.66   26.70
  -5 -13   4  524.55   40.70
   5  13  -4  486.65   27.70
   4 -13  -4   91.79    6.90
  -4 -13   4  121.09   24.80
  -4 -13   4   83.19   13.90
  -4  13   4  104.89   15.20
   4  13  -4   95.19   13.30
   3 -13  -4  625.24   24.90
  -3 -13   4  701.63   43.70
  -3 -13   4  662.83   30.70
   3  13  -4  649.34   29.70
  -3  13   4  648.14   31.20
   2 -13  -4  172.08   13.30
  -2 -13   4  183.58   26.10
  -2 -13   4  155.38   13.40
  -2 -13   4  170.98   15.50
   2  13  -4  196.68   14.50
  -2  13   4  183.68   15.40
  -1 -13   4   20.80    8.00
  -1 -13   4   23.10    5.60
  -1 -13   4   33.50    7.70
   1 -13  -4   38.50    8.90
   1 -13  -4   21.90    5.10
  -1  13   4   63.29   12.30
   1  13  -4   39.60    8.00
   0 -13  -4  320.97   17.90
   0 -13   4  311.67   18.00
   0 -13   4  324.77   25.20
   0 -13   4  340.57   18.30
   0 -13  -4  319.07   22.10
   0  13  -4  361.46   18.10
   0  13   4  308.57   20.80
   1 -13   4  500.15   22.20
  -1 -13  -4  494.45   24.10
  -1 -13  -4  540.95   31.10
   1 -13   4  449.76   24.80
   1 -13   4  492.35   29.80
   1  13   4  514.65   27.60
  -1  13  -4  485.15   21.50
   2 -13   4    1.40    2.80
   2 -13   4    0.70    1.40
   2 -13   4   -0.30    1.70
  -2 -13  -4   -1.60    1.40
  -2 -13  -4   -0.70    2.60
  -2  13  -4   -0.20    1.80
   2  13   4   -2.30    1.60
   3 -13   4  119.19    9.40
   3 -13   4  113.49    9.90
  -3 -13  -4  108.59   20.00
  -3 -13  -4  123.19   16.80
   3  13   4  123.09   16.60
  -3  13  -4  121.69    9.80
  -4 -13  -4   74.69   11.60
  -4 -13  -4   78.09   16.70
   4 -13   4   95.79   11.20
   4 -13   4   84.69    7.90
   4  13   4   89.99   14.70
   5 -13   4   26.10    6.30
  -5 -13  -4   13.00    8.10
  -5 -13  -4   23.00    8.40
   5 -13   4   10.00    3.80
   5 -13   4   19.40    4.80
   5  13   4   22.30    8.20
   6 -13   4  161.88   18.10
   6 -13   4  156.68   12.20
  -6 -13  -4  165.58   28.80
   6 -13   4  147.19   11.20
  -6 -13  -4  173.08   21.10
   6  13   4  161.78   21.30
  -7 -13  -4  202.78   19.40
   7 -13   4  167.48   12.50
   7 -13   4  176.98   13.70
  -7 -13  -4  155.58   26.90
   7  13   4  164.58   22.10
   8 -13   4    2.60    2.30
   8 -13   4   -1.00    1.60
  -8 -13  -4    4.20    5.60
   8  13   4    0.00    3.50
   9 -13   4  118.49   15.10
   9 -13   4  135.79   16.50
  -9 -13  -4  143.59   27.20
   9  13   4  161.78   24.60
 -10 -13  -4  135.69   29.80
  10 -13   4  135.49   17.40
  10 -13   4  138.79   17.40
  10  13   4  144.99   22.20
 -11 -13  -4    1.50    4.30
  11 -13   4   -1.20    1.60
  11 -13   4   -0.10    2.40
  11  13   4    1.50    8.80
 -11 -14   4   14.00    9.00
  11 -14  -4   17.20    7.40
  11  14  -4   18.50    8.70
 -10 -14   4   10.10   10.00
  10 -14  -4    4.80    4.30
  10  14  -4   -1.40    2.70
   9 -14  -4  209.48   26.50
   9  14  -4  184.68   23.90
  -8 -14   4    0.10    4.40
   8 -14  -4    2.30    3.60
   8  14  -4    2.90    3.40
  -7 -14   4  395.76   27.70
  -7 -14   4  252.47   33.60
   7 -14  -4  370.66   25.70
   7  14  -4  358.86   26.20
  -6 -14   4   -1.00    3.50
  -6 -14   4    0.30    2.60
   6 -14  -4    0.70    3.30
   6  14  -4    0.30    3.30
  -5 -14   4   91.39   15.20
   5 -14  -4   50.29   11.10
  -5 -14   4   64.29   17.90
   5  14  -4  107.29   16.20
  -4 -14   4   -1.80    1.10
   4 -14  -4    2.70    1.90
  -4 -14   4    0.20    4.20
   4 -14  -4    2.80    1.60
   4  14  -4   -0.80    2.60
  -4  14   4    2.30    3.80
   3 -14  -4  503.35   21.90
  -3 -14   4  583.44   40.20
  -3 -14   4  470.45   26.10
   3  14  -4  479.65   25.80
  -3  14   4  465.75   26.70
   2 -14  -4    4.00    2.30
  -2 -14   4    3.80    3.10
  -2 -14   4    4.80    6.20
   2 -14  -4    1.50    2.30
   2  14  -4    0.30    2.20
  -2  14   4   -2.40    2.20
  -1 -14   4  435.66   22.90
   1 -14  -4  470.55   21.20
  -1 -14   4  449.26   32.50
   1 -14  -4  451.95   25.30
  -1  14   4  446.86   25.80
   1  14  -4  456.75   22.80
   0 -14   4   18.60    7.90
   0 -14  -4   16.30    6.90
   0 -14   4   29.20    7.50
   0 -14   4   19.50    5.40
   0 -14  -4   22.20    5.80
   0  14   4   18.60    6.90
   0  14  -4   24.40    6.80
   1 -14   4  273.57   16.20
   1 -14   4  285.87   22.90
   1 -14   4  285.57   17.40
  -1 -14  -4  274.07   22.40
  -1 -14  -4  280.47   17.90
   1  14   4  299.07   21.00
  -1  14  -4  299.37   16.60
  -2 -14  -4    5.20    3.90
  -2 -14  -4   -0.90    3.50
   2 -14   4    3.10    2.80
   2 -14   4    9.80    5.70
   2 -14   4   13.50    4.90
   2  14   4    7.20    5.40
  -2  14  -4    7.20    3.70
   3 -14   4  462.95   26.40
  -3 -14  -4  424.46   31.90
   3 -14   4  417.56   21.30
  -3 -14  -4  487.15   26.80
   3 -14   4  462.65   20.60
   3  14   4  479.15   28.30
  -3  14  -4  482.55   21.50
  -4 -14  -4   33.10   11.70
   4 -14   4   37.10    7.80
  -4 -14  -4   28.30    7.50
   4 -14   4   38.80    7.00
   4 -14   4   42.60    8.10
   4  14   4   28.20    9.00
   5 -14   4  392.26   20.60
   5 -14   4  467.45   19.90
  -5 -14  -4  347.07   31.80
  -5 -14  -4  414.56   26.70
   5  14   4  386.66   27.20
   6 -14   4   11.30    4.10
   6 -14   4    3.40    3.00
  -6 -14  -4    3.10    3.30
  -6 -14  -4   -0.90    4.10
   6  14   4    9.10    5.80
   7 -14   4   86.49   12.60
  -7 -14  -4   77.29   18.50
  -7 -14  -4   82.99   15.60
   7 -14   4   93.99    8.80
   7  14   4  108.99   18.50
   8 -14   4    5.30    2.80
   8 -14   4    1.10    2.50
  -8 -14  -4   -1.70    2.40
   8  14   4    3.70    4.70
   9 -14   4  130.49   11.40
  -9 -14  -4  127.59   29.30
   9 -14   4  129.29   16.50
   9  14   4  119.49   21.80
 -10 -14  -4   30.60   14.80
  10 -14   4   36.60    8.50
  10 -14   4   26.90    8.30
  10  14   4   34.80   12.10
  11 -14   4  252.77   20.20
  11 -14   4  271.67   19.00
 -11 -14  -4  317.47   48.20
  11  14   4  251.57   32.40
  10 -15  -4    5.00    5.20
 -10 -15   4    5.50    6.20
  10  15  -4    7.70    5.80
  -9 -15   4  186.48   36.70
   9 -15  -4  161.58   23.40
   9  15  -4  124.89   20.10
  -8 -15   4   70.79   22.00
   8 -15  -4   47.50   11.90
   8  15  -4   76.39   14.80
  -7 -15   4    2.10    5.90
   7 -15  -4   11.60    6.20
   7  15  -4    9.70    6.30
   6 -15  -4  104.79   17.40
  -6 -15   4   69.29   21.00
  -6 -15   4   73.49   14.10
   6  15  -4   71.39   13.80
   5 -15  -4  487.65   29.70
  -5 -15   4  465.55   28.80
  -5 -15   4  516.45   42.20
   5  15  -4  498.55   29.00
  -5  15   4  484.55   28.60
  -4 -15   4   14.30    8.60
   4 -15  -4   14.40    3.00
   4 -15  -4   12.80    3.60
  -4 -15   4   15.90    6.10
   4  15  -4    5.10    4.80
  -4  15   4   17.60    6.60
  -3 -15   4  246.78   18.80
   3 -15  -4  244.98   14.80
   3 -15  -4  236.48   12.40
  -3 -15   4  232.38   31.10
  -3  15   4  249.48   19.40
   3  15  -4  247.58   18.30
  -2 -15   4    5.90    4.10
  -2 -15   4   23.70   10.70
   2 -15  -4    2.60    2.40
   2 -15  -4   11.30    4.70
  -2  15   4    4.70    4.50
   2  15  -4   19.40    6.20
   1 -15  -4   16.60    6.40
  -1 -15   4   12.40    4.80
  -1 -15   4   18.10    8.30
   1 -15  -4   14.90    4.60
   1  15  -4   18.10    6.40
  -1  15   4   14.60    6.80
   0 -15  -4    6.00    3.60
   0 -15   4    2.60    4.10
   0 -15   4    1.30    2.50
   0 -15  -4    1.90    3.70
   0  15  -4    1.60    2.90
   0  15   4    3.60    4.10
  -1 -15  -4  343.17   20.60
   1 -15   4  333.67   18.60
   1 -15   4  347.17   26.10
  -1 -15  -4  348.97   26.10
  -1  15  -4  333.27   18.50
   1  15   4  335.07   23.10
  -2 -15  -4   21.80    9.50
   2 -15   4   17.60    5.20
   2 -15   4   30.30    9.30
  -2 -15  -4   21.80    7.00
   2 -15   4   24.60    6.40
   2  15   4   22.00    8.10
   3 -15   4  220.28   14.60
  -3 -15  -4  220.78   17.90
  -3 -15  -4  243.28   24.40
   3 -15   4  225.98   18.40
   3 -15   4  215.58   15.20
   3  15   4  221.58   19.50
   4 -15   4  140.49   10.60
   4 -15   4  164.98   19.10
  -4 -15  -4  136.49   18.00
   4 -15   4  152.98   12.50
  -4 -15  -4  150.88   24.90
   4 -15   4  199.58   15.70
   4  15   4  180.28   32.70
  -5 -15  -4    3.60    3.50
   5 -15   4   12.60    3.80
   5 -15   4    9.20    4.20
  -5 -15  -4   10.00    9.00
   5  15   4   16.20    7.70
  -6 -15  -4   69.99   13.60
   6 -15   4   78.19   11.30
   6 -15   4   79.39    7.40
  -6 -15  -4   69.69   17.90
   6  15   4   98.39   18.60
   7 -15   4  197.48   15.30
  -7 -15  -4  205.98   35.00
   7 -15   4  195.88   11.30
   7  15   4  160.48   22.50
   8 -15   4    7.10    4.40
  -8 -15  -4    1.60    6.00
   8  15   4    5.60    5.80
   9 -15   4  169.68   15.40
  -9 -15  -4  251.57   39.50
   9  15   4  250.77   30.90
  10 -15   4   25.50    7.70
 -10 -15  -4   17.70   11.00
  10  15   4   42.10   12.70
 -10 -16   4  144.59   29.80
  10 -16  -4  160.28   22.70
  10  16  -4  190.78   27.10
   9 -16  -4  100.29   17.40
  -9 -16   4  120.49   24.70
   9  16  -4  129.49   22.70
   8 -16  -4   15.70    7.60
  -8 -16   4   38.10   15.30
   8  16  -4   19.70    9.00
  -7 -16   4  150.88   29.90
   7 -16  -4  115.69   19.10
   7  16  -4  147.59   21.40
  -6 -16   4   24.20   13.80
   6 -16  -4   21.40    8.30
   6  16  -4   21.90   13.30
  -5 -16   4   12.30    6.50
  -5 -16   4   19.10   12.10
   5  16  -4    9.10    5.60
  -4 -16   4  329.27   23.60
  -4 -16   4  390.96   36.00
   4 -16  -4  331.97   13.30
   4  16  -4  350.96   23.50
  -4  16   4  386.06   25.10
  -3 -16   4  128.29   16.30
  -3 -16   4  127.19   23.60
   3 -16  -4  112.69    8.50
  -3  16   4  136.69   18.80
   3  16  -4  113.19   15.80
   2 -16  -4   33.70    6.40
  -2 -16   4   18.40   10.80
  -2 -16   4   41.10    9.00
   2  16  -4   33.10    8.40
  -2  16   4   32.70    8.90
   1 -16  -4  189.28   13.30
  -1 -16   4  171.58   29.70
  -1 -16   4  172.08   14.60
   1  16  -4  189.58   14.90
  -1  16   4  192.18   17.40
   0 -16  -4   31.70    7.60
   0 -16   4   46.40   16.60
   0 -16   4   34.20    7.60
   0 -16  -4   42.90   15.10
   0  16  -4   36.30    8.50
   0  16   4   39.30   10.30
   1 -16   4  108.79   10.50
   1 -16   4   90.99   20.00
  -1 -16  -4  103.09   19.90
  -1 -16  -4  103.99   14.70
   1  16   4  122.59   18.90
  -1  16  -4   76.69   11.10
   2 -16   4  351.86   21.40
  -2 -16  -4  365.86   23.00
  -2 -16  -4  359.46   28.90
   2 -16   4  387.06   26.80
  -2  16  -4  355.06   19.60
   2  16   4  364.86   26.10
  -3 -16  -4  111.89   16.20
  -3 -16  -4  112.09   21.50
   3 -16   4   91.89    9.10
   3 -16   4  111.69   16.30
   3  16   4   90.89   15.20
  -3  16  -4  129.89   11.30
  -4 -16  -4   20.90   10.10
   4 -16   4   27.40    7.20
   4 -16   4   23.60    5.30
  -4 -16  -4   19.10    7.20
   4 -16   4   24.60    7.10
   4  16   4    9.50    6.30
  -5 -16  -4  123.69   24.70
  -5 -16  -4  136.59   19.50
   5 -16   4  136.09   12.20
   5 -16   4  109.49   10.60
   5 -16   4  125.99    9.50
   5  16   4  105.29   17.10
   6 -16   4   80.59    7.60
   6 -16   4   97.29   13.10
  -6 -16  -4   38.10   13.30
   6 -16   4   72.29    6.40
   6  16   4   85.69   17.00
   7 -16   4   65.19   10.90
  -7 -16  -4   60.59   18.30
   7  16   4   47.60   13.30
  -8 -16  -4  117.89   23.70
   8 -16   4  117.69   14.90
   8  16   4  121.29   21.20
   9 -16   4   65.29   11.90
  -9 -16  -4   86.79   22.10
   9 -17  -4   -1.20    2.00
  -9 -17   4    4.60    8.00
   9  17  -4    6.40    5.20
  -8 -17   4  278.37   42.10
   8 -17  -4  291.17   24.80
   8  17  -4  252.77   29.90
  -7 -17   4   -3.30    2.90
   7 -17  -4    4.30    4.80
   7  17  -4    1.60    3.20
  -6 -17   4  204.68   33.50
   6 -17  -4  213.38   25.60
   6  17  -4  230.18   26.20
   5 -17  -4    5.20    4.20
  -5 -17   4   22.00   11.80
   4 -17  -4   11.50    3.20
  -4 -17   4    4.70    4.40
   4 -17  -4    6.10    2.00
  -4 -17   4    9.80    7.90
  -4  17   4    9.30    5.50
   4  17  -4   16.80    7.20
   3 -17  -4    0.30    2.00
  -3 -17   4   -1.40    3.20
   3 -17  -4    1.00    1.60
  -3  17   4    6.30    5.30
   3  17  -4    5.00    4.90
   2 -17  -4  317.57   20.30
   2 -17  -4  289.17   16.10
  -2 -17   4  298.27   20.90
  -2 -17   4  329.27   31.20
   2  17  -4  292.37   20.30
   1 -17  -4    3.30    3.80
  -1 -17   4   -0.60    3.10
  -1 -17   4    0.40    2.40
   1 -17  -4    2.20    2.30
   1  17  -4   -0.80    2.30
   0 -17   4  328.17   20.20
   0 -17  -4  328.97   19.80
   0 -17  -4  331.07   25.00
   0 -17   4  326.07   28.10
   0  17  -4  331.77   20.20
   0  17   4  308.07   26.60
  -1 -17  -4    0.10    3.10
   1 -17   4   -1.50    1.90
  -1 -17  -4    1.10    2.60
   1 -17   4    0.00    1.40
  -1  17  -4    2.60    2.80
   1  17   4    2.00    3.50
  -2 -17  -4   22.80    9.40
   2 -17   4   19.90    5.70
  -2 -17  -4   17.00    6.60
   2 -17   4   17.80    7.80
   2  17   4   13.40    6.60
  -2  17  -4   13.80    5.00
   3 -17   4    0.20    2.20
  -3 -17  -4   11.50    7.30
   3 -17   4    0.10    1.80
   3  17   4    1.50    3.20
  -3  17  -4    1.50    2.40
   4 -17   4  274.47   18.20
  -4 -17  -4  288.97   36.80
   4 -17   4  269.67   15.20
   4 -17   4  266.77   18.50
  -4 -17  -4  286.17   22.30
   4  17   4  180.28   22.50
   5 -17   4    0.50    2.00
   5 -17   4    1.90    2.10
  -5 -17  -4   -0.10    4.00
   5 -17   4    2.90    2.10
   5  17   4    3.50    4.80
  -6 -17  -4  376.36   36.30
   6 -17   4  339.97   20.90
   6  17   4  336.67   27.70
  -7 -17  -4   13.10    8.50
   7 -17   4   18.50    6.50
   7  17   4    8.50    6.30
  -8 -17  -4    7.00    8.40
   8 -17   4    0.50    1.90
  -8 -18   4   20.80   13.10
   8 -18  -4    6.70    5.10
   8  18  -4    7.50    5.30
  -7 -18   4   25.40   13.60
   7 -18  -4   36.20   10.50
   7  18  -4   50.19   13.50
   6 -18  -4   19.20    7.70
  -6 -18   4   28.80   12.60
   6  18  -4   37.80   11.00
  -5 -18   4   11.60    9.70
   5 -18  -4   13.00    6.80
   5  18  -4   18.20    7.70
  -4 -18   4  362.36   36.20
   4 -18  -4  284.17   12.80
   4 -18  -4  283.37   11.70
  -4  18   4  286.17   23.00
  -3 -18   4   45.90   15.40
  -3 -18   4   33.20    8.80
   3 -18  -4   42.10    8.00
   3 -18  -4   42.80    6.30
   3  18  -4   30.40    8.80
  -3  18   4   49.60   11.70
   2 -18  -4   41.70    7.50
   2 -18  -4   37.10    8.80
  -2 -18   4   48.20   16.00
  -2 -18   4   24.40    7.90
  -2  18   4   41.20   10.90
   2  18  -4   39.50    9.70
  -1 -18   4   82.09   13.80
   1 -18  -4   67.79   12.90
   1 -18  -4   78.79   10.90
  -1 -18   4   95.99   21.30
  -1  18   4   77.29   14.20
   1  18  -4   65.59   11.50
   0 -18  -4   45.50   11.80
   0 -18   4   52.89   14.70
   0 -18  -4   71.49   11.60
   0 -18   4   66.09   11.10
   0  18   4   73.29   14.80
   0  18  -4   51.39    9.90
  -1 -18  -4    6.60    4.40
  -1 -18  -4    2.00    4.00
   1 -18   4   13.40    5.00
   1 -18   4    9.60    6.50
   1  18   4    3.30    4.50
  -1  18  -4    5.80    3.50
   2 -18   4  293.37   23.70
   2 -18   4  261.97   17.20
  -2 -18  -4  289.57   21.20
  -2 -18  -4  278.27   26.70
  -2  18  -4  298.37   18.70
   2  18   4  323.07   25.00
   3 -18   4   44.10    7.70
   3 -18   4   50.19   11.40
  -3 -18  -4   48.90   14.30
  -3 -18  -4   32.40    9.30
   3  18   4   28.70    9.30
   4 -18   4   62.19    8.90
  -4 -18  -4   51.39   15.10
   4 -18   4   50.59   10.20
   4 -18   4   54.79   10.10
   4  18   4   57.79   14.40
   5 -18   4   80.89    7.30
   5 -18   4   80.49    7.90
   5 -18   4   78.09   12.20
  -5 -18  -4   79.89   19.10
   5  18   4   87.79   17.60
  -6 -18  -4   83.29   22.30
   6 -18   4   59.79   10.40
   6  18   4   31.70   10.40
   7 -18   4   12.40    5.70
  -7 -18  -4   10.00    7.40
   6 -19  -4   16.30    8.00
  -6 -19   4   15.10   10.90
   6  19  -4   15.20    6.50
   5 -19  -4  139.29   20.70
  -5 -19   4  152.88   31.20
   5  19  -4  160.18   22.10
  -4 -19   4    0.50    4.80
  -4  19   4    4.30    3.90
   4  19  -4    5.30    4.00
   3 -19  -4  129.49   11.00
  -3 -19   4  113.39   24.80
   3 -19  -4  110.79    8.70
  -3  19   4  123.19   18.00
   3  19  -4  110.79   17.70
   2 -19  -4   58.29    9.00
   2 -19  -4   65.19   11.50
  -2 -19   4   51.39   10.80
  -2 -19   4   32.30   12.70
  -2  19   4   60.79   13.00
   2  19  -4   56.69   11.20
  -1 -19   4    5.50    4.80
   1 -19  -4    0.00    1.50
   1 -19  -4    5.40    4.40
  -1 -19   4    0.90    2.30
  -1  19   4   -0.50    3.30
   1  19  -4   -1.00    2.00
   0 -19  -4   83.09   16.50
   0 -19   4   95.09   19.40
   0 -19  -4   85.59   13.20
   0  19  -4   92.69   13.70
   0  19   4   68.99   13.80
  -1 -19  -4  111.99   19.60
  -1 -19  -4  131.09   17.10
   1 -19   4  122.39   12.30
   1 -19   4  120.39   20.70
  -1  19  -4  101.49   13.80
   1  19   4   93.09   15.50
  -2 -19  -4    1.70    3.30
   2 -19   4   -0.10    2.00
   2 -19   4    5.60    4.70
  -2 -19  -4    4.00    4.70
  -2  19  -4    0.30    1.70
   2  19   4    1.00    2.70
   3 -19   4  171.98   16.50
   3 -19   4  144.09   17.60
   3 -19   4  176.08   13.20
  -3 -19  -4  162.68   25.20
   3  19   4  154.28   23.20
  -4 -19  -4   47.60   14.90
   4 -19   4   60.89   10.50
   4 -19   4   60.29   11.00
   4  19   4   56.09   14.00
  -5 -19  -4    0.10    3.00
   5 -19   4    3.00    3.00
   5  19   4    1.20    3.10
   6 -19   4   18.00    6.20
  -6 -19  -4   23.20   12.90
   6  19   4   16.20    9.20
  -5 -20   4    7.00    8.00
   5 -20  -4   11.10    6.10
   5  20  -4   11.20    6.60
   4  20  -4    1.40    3.70
  -4  20   4    4.20    5.00
  -3 -20   4  103.99   26.30
   3 -20  -4  108.39    8.60
   3 -20  -4  101.79    9.70
  -3  20   4  122.89   18.40
   3  20  -4   93.59   16.20
   2 -20  -4    1.40    2.00
   2 -20  -4    5.40    3.80
  -2 -20   4    4.80    5.50
  -2  20   4    3.90    5.20
   2  20  -4   -1.00    2.00
   1 -20  -4  188.38   14.70
   1 -20  -4  177.28   17.60
  -1 -20   4  189.68   29.40
  -1  20   4  190.78   23.20
   0 -20   4   -0.60    1.70
   0 -20  -4    0.20    1.80
   0 -20   4    2.00    4.10
   0 -20  -4    3.50    4.60
   0  20  -4    4.10    3.30
   0  20   4    2.00    2.60
  -1 -20  -4   80.29   17.20
   1 -20   4   93.49   17.80
   1 -20   4   83.49   13.00
   1  20   4   73.49   14.40
  -1  20  -4  105.29   14.80
   2 -20   4    9.40    5.30
  -2 -20  -4    4.20    4.80
   2 -20   4    3.80    3.10
  -2  20  -4    7.80    4.70
   2  20   4    3.10    3.70
   3 -20   4   53.69   11.50
   3 -20   4   51.99   10.90
   3  20   4   46.10   12.40
   4 -20   4    3.70    2.90
   4 -20   4    1.40    2.40
   4 -20   4    3.90    2.40
  -4 -20  -4    4.40    5.50
   4  20   4    4.80    5.50
   1 -21  -4    5.20    3.90
   1 -21  -4    4.00    2.80
  -1 -21   4    8.50    7.50
  -1  21   4   14.40    7.40
   1  21  -4    6.30    3.90
   0 -21   4    4.50    4.50
   0 -21  -4   19.50    8.80
   0  21   4   17.30    8.00
   0  21  -4    6.40    4.60
   1 -21   4   84.09   12.90
  -1 -21  -4   75.99   17.00
   1 -21   4   94.49   18.30
   1  21   4  107.89   19.70
  15   0  -5  104.39   28.80
  14   0  -5   -2.20    1.90
  13   0  -5  358.66   26.90
  13   0  -5  385.66   30.70
  12   0  -5    1.40    4.20
  12   0  -5    4.70    6.20
 -12   0   5    0.10    2.00
  11   0  -5   -1.40    2.30
 -11   0   5    2.00    3.30
  11   0  -5    1.60    3.90
  10   0  -5   -2.60    2.40
  10   0  -5   -0.30    2.00
 -10   0   5    1.90    2.50
   9   0  -5  483.05   28.70
   9   0  -5  542.65   27.20
  -9   0   5  460.65   32.50
   8   0  -5    1.40    2.50
   8   0  -5   -0.50    1.90
   7   0  -5  423.06   23.30
  -7   0   5  389.56   21.20
   7   0  -5  409.06   21.00
  -7   0   5  383.76   19.60
  -6   0   5    1.90    1.90
   6   0  -5    3.40    2.40
  -6   0   5   -0.80    0.70
   6   0  -5   -0.10    1.70
  -6   0   5    0.00    1.60
  -5   0   5  143.29   10.20
   5   0  -5  167.88   12.10
   5   0  -5  161.78   11.10
  -5   0   5  150.38   10.80
  -5   0   5  111.89   14.60
  -4   0   5    1.40    1.40
  -4   0   5    0.20    1.30
  -4   0   5    1.00    2.60
   4   0  -5   -1.20    0.70
   4   0  -5   -2.00    0.80
   3   0  -5 6166.58  151.38
  -3   0   5 6036.70  150.28
  -2   0   5   -0.10    1.20
  -2   0   5   -0.10    1.20
   2   0  -5   -0.40    0.90
   2   0  -5    1.30    1.40
   2   0  -5    0.10    1.10
   1   0  -5 6361.96  150.48
   1   0  -5 6462.35  151.58
   0   0  -5    4.00    2.40
   0   0   5    2.90    1.90
   0   0  -5    2.00    1.10
  -1   0  -5  432.46   18.70
   1   0   5  441.56   19.50
  -1   0  -5  432.06   14.10
   2   0   5    0.00    2.50
   2   0   5    3.10    1.50
  -2   0  -5   -0.50    1.00
  -2   0  -5    0.30    1.00
  -3   0  -5 4104.39  103.79
   3   0   5 4112.49  103.59
   4   0   5    0.00    1.50
  -4   0  -5   -1.50    0.80
  -4   0  -5   -0.80    0.90
   4   0   5    1.00    1.40
   5   0   5  499.65   20.90
  -5   0  -5  508.05   26.00
   5   0   5  512.35   28.40
  -5   0  -5  480.05   20.50
   6   0   5    3.40    2.50
  -6   0  -5    2.50    2.00
  -6   0  -5   -0.30    1.90
   6   0   5   -1.10    1.00
  -7   0  -5    0.50    3.00
  -7   0  -5    5.50    3.10
   7   0   5    2.70    2.50
   7   0   5    8.00    5.60
   8   0   5   -1.20    1.50
  -8   0  -5   -1.20    1.20
   8   0   5    0.50    2.10
  -8   0  -5    1.20    2.40
   9   0   5 2647.94   80.39
   9   0   5 2501.35   96.29
  10   0   5    0.10    2.00
  10   0   5   -1.10    2.30
  11   0   5  393.96   26.30
  11   0   5  354.06   46.50
 -12   0  -5   -0.10    1.80
  12   0   5    0.00    3.10
  12   0   5    3.80    3.30
  13   0   5    4.50    4.10
  14   0   5    2.70    4.80
  15   1  -5   25.20   13.60
  14  -1  -5   38.40   13.40
  14   1  -5   48.20   13.50
  13  -1  -5  122.39   19.50
  13  -1  -5  109.19   16.80
  13   1  -5   62.29   14.40
  13   1  -5  118.29   18.20
  12  -1  -5   31.10   10.20
  12  -1  -5   64.59   14.70
  12   1  -5   41.00   11.60
  12   1  -5   67.59   14.00
  11  -1  -5  278.37   20.80
  11  -1  -5  193.48   22.70
 -11   1   5  287.27   25.80
  11   1  -5  282.37   21.60
  11   1  -5  256.67   22.70
  10  -1  -5   47.30   10.30
  10  -1  -5   22.10    8.10
  10   1  -5   18.00    7.00
 -10   1   5   25.20    8.80
  10   1  -5   12.80    6.10
   9  -1  -5  142.39   13.20
   9  -1  -5  102.99   14.40
  -9  -1   5  193.28   28.50
  -9   1   5  126.69   18.90
   9   1  -5  136.09   17.60
   9   1  -5  113.69   14.20
   8  -1  -5   89.79   12.20
   8  -1  -5   61.89   11.00
  -8  -1   5   68.69   14.40
  -8   1   5   84.09   14.70
   8   1  -5   90.89   14.70
   8   1  -5   70.19   10.90
  -7  -1   5 1043.00   39.10
   7  -1  -5 1106.19   38.30
  -7  -1   5 1006.00   37.40
   7  -1  -5 1105.69   41.50
  -7  -1   5 1114.59   50.09
  -7   1   5 1043.20   36.50
  -7   1   5 1049.70   46.20
   7   1  -5 1071.19   41.60
   7   1  -5 1056.39   39.30
  -6  -1   5  212.08   13.80
   6  -1  -5  222.98   15.40
   6  -1  -5  245.88   14.40
  -6  -1   5  234.48   14.80
  -6  -1   5  265.07   21.40
   6   1  -5  249.18   15.20
   6   1  -5  249.97   16.20
  -6   1   5  239.68   15.00
  -6   1   5  222.58   14.70
  -6   1   5  217.48   18.00
  -5  -1   5 2402.36   64.89
  -5  -1   5 2376.86   76.89
  -5   1   5 2071.19   71.09
  -5   1   5 2351.06   62.99
  -5   1   5 2298.17   64.79
  -4  -1   5  202.08   11.70
   4  -1  -5  212.98   11.80
  -4  -1   5  207.48   16.80
   4  -1  -5  217.98   12.80
  -4  -1   5  200.98   12.00
   4   1  -5  194.48   12.00
   4   1  -5  191.88   12.00
  -4   1   5  191.58   11.30
  -4   1   5  200.28   12.00
   3  -1  -5  107.39    7.90
  -3  -1   5  134.19    8.40
  -3  -1   5  117.89    8.60
   3  -1  -5  131.29    8.40
   3  -1  -5  104.89    8.10
  -3   1   5  124.79    8.50
   3   1  -5  128.09    8.90
   3   1  -5  121.89    8.40
  -3   1   5  127.29    8.70
   2  -1  -5 2316.77   63.49
  -2  -1   5 2244.68   62.39
   2  -1  -5 2429.76   65.29
   2   1  -5 2344.27   63.19
  -1  -1   5 1374.76   40.20
   0  -1   5 2399.96   69.89
   1  -1   5 2311.27   57.09
  -1  -1  -5 2383.16   62.59
  -1   1  -5 2385.56   57.79
   1   1   5 2365.06   61.89
   2  -1   5   56.19    4.00
   2  -1   5   81.09   10.30
  -2  -1  -5   61.59    5.30
  -2   1  -5   75.69    9.50
  -2   1  -5   68.69    4.40
   2   1   5   90.99   12.20
   2   1   5   62.59    5.20
  -3  -1  -5  673.93   22.90
  -3  -1  -5  657.33   28.30
   3  -1   5  664.23   20.70
   3  -1   5  651.63   27.90
   3   1   5  635.74   29.10
  -3   1  -5  659.63   20.70
  -3   1  -5  652.63   26.20
   3   1   5  629.34   22.30
   4  -1   5  996.50   39.10
   4  -1   5 1045.90   31.00
  -4  -1  -5  989.20   32.40
  -4  -1  -5  967.30   38.50
  -4   1  -5 1011.50   30.70
  -4   1  -5  986.30   36.60
   4   1   5 1030.90   32.60
   4   1   5  983.60   40.90
   5  -1   5  439.86   18.80
  -5  -1  -5  460.45   20.20
   5  -1   5  409.66   24.70
  -5  -1  -5  410.26   24.30
   5   1   5  475.75   20.40
   5   1   5  440.86   27.00
  -5   1  -5  437.86   18.50
  -6  -1  -5  260.87   19.90
   6  -1   5  242.98   20.10
  -6  -1  -5  286.87   16.20
   6  -1   5  273.17   15.20
   6   1   5  250.17   15.50
   6   1   5  247.28   21.30
  -6   1  -5  262.47   14.60
   7  -1   5 1076.19   38.80
  -7  -1  -5 1087.99   39.80
  -7  -1  -5 1027.00   39.20
   7  -1   5 1054.59   49.20
  -7  -1  -5 1180.48   48.80
   7   1   5 1094.29   51.99
  -7   1  -5 1122.69   42.00
   7   1   5 1096.19   40.30
  -8  -1  -5  212.08   25.80
   8  -1   5  121.99   18.80
  -8   1  -5  147.29   12.50
  -8   1  -5  195.88   17.20
   8   1   5  152.28   13.70
  -9  -1  -5  127.79   21.20
   9  -1   5  134.29   16.40
   9  -1   5  133.79   23.10
   9   1   5  121.79   15.60
  -9   1  -5  144.79   19.90
   9   1   5  113.19   20.90
 -10  -1  -5  395.86   29.80
  10  -1   5  385.46   24.30
  10  -1   5  360.36   32.20
  10   1   5  338.37   23.60
  10   1   5  380.06   33.90
 -10   1  -5  375.96   26.90
  11  -1   5  186.98   22.00
  11  -1   5  189.18   30.10
  11   1   5  164.28   30.00
  11   1   5  174.08   21.10
  12  -1   5    2.90    4.50
  12  -1   5   -0.10    2.60
  12   1   5   10.00    9.10
 -12   1  -5   -0.10    2.20
  13  -1   5  525.55   33.50
  13   1   5  516.25   33.90
  14  -1   5   20.40    9.30
  14   1   5   27.00    9.60
  15  -2  -5   59.49   22.80
  15   2  -5   45.00   14.00
  14  -2  -5   27.60   11.00
  14   2  -5    5.60    5.70
  13  -2  -5   55.89   14.90
  13  -2  -5   36.60   10.60
  13   2  -5   40.10   13.40
  13   2  -5   81.99   16.10
  12  -2  -5  475.15   33.00
  12  -2  -5  510.05   30.30
  12   2  -5  536.65   35.20
  12   2  -5  490.55   31.20
  11  -2  -5   18.10    7.90
 -11  -2   5   33.70   12.80
  11  -2  -5   20.00    7.60
  11   2  -5   17.50    7.30
 -11   2   5   15.80    7.70
  11   2  -5   21.80    8.80
  10  -2  -5   68.89   11.90
  10  -2  -5   55.69   12.60
 -10  -2   5   31.30   11.70
 -10   2   5   53.89   12.60
  10   2  -5   68.79   13.40
  10   2  -5   59.79   12.00
  -9  -2   5  366.66   30.80
   9  -2  -5  419.36   26.10
   9  -2  -5  410.56   22.50
  -9   2   5  384.66   26.90
   9   2  -5  407.26   26.10
   9   2  -5  427.86   24.70
  -8  -2   5   16.70    8.00
   8  -2  -5   27.40    7.60
   8  -2  -5   31.30    6.90
  -8   2   5   29.60    9.40
   8   2  -5   28.80    7.30
   8   2  -5   19.00    6.30
  -7  -2   5   32.70    8.10
   7  -2  -5   28.90    6.90
  -7  -2   5   22.50    5.50
   7  -2  -5   28.60    7.80
  -7  -2   5   29.10    9.90
   7   2  -5   25.40    7.40
  -7   2   5   31.30    8.90
   7   2  -5   17.40    5.20
  -6  -2   5  664.33   27.40
  -6  -2   5  684.23   37.70
   6  -2  -5  690.93   26.40
   6  -2  -5  642.94   28.70
  -6  -2   5  717.63   28.50
   6   2  -5  692.53   28.60
  -6   2   5  674.13   32.20
  -6   2   5  664.43   28.00
   6   2  -5  688.33   29.60
  -6   2   5  655.23   25.20
  -5  -2   5   33.60    6.80
   5  -2  -5   37.60    7.20
  -5  -2   5   26.20    5.40
   5  -2  -5   31.90    6.00
  -5   2   5   22.20    5.10
  -5   2   5   33.20    8.00
   5   2  -5   32.20    6.30
  -5   2   5   49.20    7.30
   5   2  -5   45.80    8.00
  -4  -2   5 1707.23   49.30
   4  -2  -5 1644.64   49.30
  -4  -2   5 1766.72   67.89
   4   2  -5 1687.83   50.49
   4   2  -5 1766.62   51.09
  -4   2   5 1759.52   50.59
  -4   2   5 1747.63   48.60
  -4   2   5 1759.02   55.69
  -3  -2   5  465.55   19.80
   3  -2  -5  519.15   20.30
  -3  -2   5  491.65   18.70
   3  -2  -5  495.25   19.20
   3  -2  -5  515.95   19.30
   3   2  -5  501.15   19.40
   3   2  -5  515.55   20.50
  -3   2   5  505.65   19.50
   2  -2  -5  542.85   19.90
   2  -2  -5  534.15   19.90
   2  -2  -5  557.64   19.60
  -2   2   5  536.05   19.60
   2   2  -5  536.45   18.40
  -2   2   5  540.55   20.50
   2   2  -5  509.75   20.10
  -1  -2   5  241.28   12.60
   1  -2  -5  261.37   11.50
  -1  -2   5  247.08    9.40
   1  -2  -5  255.97   12.80
  -1   2   5  246.08   13.00
  -1   2   5  251.97   11.30
   1   2  -5  263.17    9.90
   0  -2  -5 1779.12   50.99
   0   2  -5 1797.52   43.90
   0   2  -5 1776.12   43.30
   0   2   5 1837.72   50.79
   1  -2   5   65.39    6.50
   1  -2   5   60.59    2.50
  -1  -2  -5   89.29   11.20
  -1  -2  -5   54.09    5.00
  -1   2  -5   57.39    5.80
   1   2   5   60.09    8.80
  -1   2  -5   58.79    2.60
   1   2   5   57.69    6.40
  -2  -2  -5 4688.23  118.09
   2  -2   5 4723.13  108.29
   2   2   5 4632.24  117.09
  -2   2  -5 4599.24  108.19
   3  -2   5  279.87   11.10
   3  -2   5  313.67   17.30
  -3  -2  -5  286.77   14.10
  -3  -2  -5  310.57   18.60
  -3   2  -5  298.27   11.20
   3   2   5  311.37   20.40
   3   2   5  276.97   13.70
   4  -2   5  116.09   11.20
  -4  -2  -5  112.99    9.00
  -4  -2  -5   97.89   13.50
   4  -2   5  122.69    7.70
   4   2   5  103.19    8.70
  -4   2  -5  123.59    7.50
   4   2   5  122.29   17.10
  -4   2  -5  117.89    9.90
   5  -2   5   30.60    8.20
   5  -2   5   38.90    6.30
  -5  -2  -5   37.10    7.10
  -5  -2  -5   35.30    8.30
  -5   2  -5   35.10    7.40
   5   2   5   17.80    6.10
   5   2   5   36.20    6.50
  -5   2  -5   33.00    5.60
   6  -2   5 1024.30   34.20
   6  -2   5  978.50   43.00
  -6  -2  -5 1012.10   44.20
   6   2   5  953.60   46.50
  -6   2  -5  914.51   37.50
  -6   2  -5 1029.30   33.60
   6   2   5  988.00   36.40
   7  -2   5    0.70    1.80
  -7  -2  -5    0.10    1.50
  -7  -2  -5    2.90    3.30
  -7  -2  -5    4.80    3.40
   7  -2   5   -1.80    1.10
  -7   2  -5    2.10    2.50
  -7   2  -5    3.50    2.40
   7   2   5    1.90    2.90
   8  -2   5  391.66   29.20
  -8  -2  -5  440.66   31.10
   8  -2   5  393.26   21.60
   8   2   5  379.56   31.30
  -8   2  -5  416.36   21.50
  -8   2  -5  400.76   24.70
   8   2   5  444.46   24.50
   9  -2   5   72.49   17.70
   9  -2   5   55.69   10.60
  -9   2  -5   69.49   13.80
   9   2   5   62.09   11.70
   9   2   5   60.09   17.20
  10  -2   5    5.40    5.80
  10  -2   5    2.70    3.60
 -10  -2  -5    2.70    4.50
  10   2   5    6.30    5.60
 -10   2  -5    6.20    4.40
  10   2   5    1.00    2.40
  11  -2   5   91.69   15.50
  11  -2   5  112.79   24.10
  11   2   5   78.29   19.70
  11   2   5   91.89   15.80
  12  -2   5  199.08   33.60
  12  -2   5  236.78   20.80
  12   2   5  280.37   44.20
  12   2   5  261.57   29.30
  13  -2   5    0.60    2.00
  13   2   5   10.80    6.80
  14  -2   5  124.89   20.10
[truncated: 723,250 more chars]
